# Supplementary material for: Global Transcriptome Profiling of Xanthomonas oryzae pv. oryzae under in planta Growth and in vitro Culture Conditions
Source: PubMed Central journal article supplement — Plant Pathol J. 2017 Oct 1;33(5):458–66. doi: 10.5423/PPJ.OA.04.2017.0076 (PMC5624488; doi:10.5423/ppj.oa.04.2017.0076), 2017-10-01
Supplement: ppj-33-458_suuppl.pdf [file ppj-33-458_suuppl.pdf]

**Supplementary Table 1.** Primer list for semi-quantitative RT-PCR

| Gene annotation                                    | gi number                        | Primer sequence 5'-3'           | DNA base quantity (mer) | Tm (50mM NaCl) | Fragment Size (bp) |
|----------------------------------------------------|----------------------------------|---------------------------------|-------------------------|----------------|--------------------|
| TonB-dependent receptor                            | gi 84625831 ref  YP_453203.1     | Forward : AAAGATACCGCGGATGCTGA  | 20                      | 52.3           | 2900               |
|                                                    |                                  | Reverse : GTGAATAACAGCTACGCACG  | 20                      | 53.6           |                    |
| Hypothetical protein WOO_1491                      | gi 84623148 ref  YP_450520.1     | Forward : GGTCTCATCAGCCAGCTGAG  | 20                      | 53.7           | 1140               |
|                                                    |                                  | Reverse : GAGTTCACCTCTCATCTCTCC | 20                      | 54.1           |                    |
| Aminotransferase and dihydrorhizobitoxine synthase | gi 84622935 ref  YP_450307.1     | Forward : ATGTCGTATCTCAATCATGA  | 20                      | 56.3           | 1320               |
|                                                    |                                  | Reverse : AACGTCATCAAGGCTGCGTT  | 20                      | 56.7           |                    |
| Porin O                                            | gi 84622659 ref  YP_450031.1     | Forward : GTGAGCAACGACACTTTGCG  | 20                      | 55.1           | 1190               |
|                                                    |                                  | Reverse : GAAGTCGTATTGGAAGCGGC  | 20                      | 52.3           |                    |
| 3-ketoacyl-ACP reductase                           | gi 84622657 ref  YP_450029.1     | Forward : GACCATGTGGAGCTCACCAT  | 20                      | 54.6           | 738                |
|                                                    |                                  | Reverse : ATGACTCTCCGCATCGCATA  | 20                      | 55.2           |                    |
| HrpF protein                                       | gi 84621766 ref  YP_449138.1     | Forward : GTCTCACTCGAAGTTGTCGG  | 20                      | 55             | 2330               |
|                                                    |                                  | Reverse : ATGTCGCTCAACATGCTTTC  | 20                      | 53.2           |                    |
| Hypothetical protein XOO_2904                      | gi 84624561 ref  YP_451933.1     | Forward : ATGGCTTTTCGATATGCATCT | 20                      | 54.7           | 500                |
|                                                    |                                  | Reverse : GGACTTCTTCACTTCCTGCA  | 20                      | 56             |                    |
| Protease                                           | gi 188578761 ref  YP_001915690.1 | Forward : GTGCTCGACACTACCACCTT  | 20                      | 53             | 1860               |
|                                                    |                                  | Reverse : CTGTCGAGCCATCAAGGACA  | 20                      | 51.5           |                    |
| 16s rRNA                                           | KY789442.1                       | Forward : CAGCAGCCGCGTAATAC     | 18                      | 58             | 410                |
|                                                    |                                  | Reverse : CCGTCAATTCCTTTGAGTTT  | 19                      | 58             |                    |

**Supplementary Table 2.** Quality of raw data

| <b>Sample</b>                | <b>Raw reads</b> | <b>N Include Reads No (%)</b> | <b>Total N No (%)</b> | <b>Q30</b> | <b>Q20</b> | <b>GC</b> |
|------------------------------|------------------|-------------------------------|-----------------------|------------|------------|-----------|
| <i>In vitro</i> -R1          | 26,646,901       | 108,305 (0.41)                | 149,288 (0.01)        | 94.75%     | 98.48%     | 53.61%    |
| <i>In vitro</i> -R2          | 26,646,901       | 27,673 (0.10)                 | 532,163 (0.02)        | 92.34%     | 96.42%     | 53.68%    |
| <i>In vitro</i> -summary     | 53,293,802       | 135,978 (0.26)                | 681,451 (0.01)        | 93.55%     | 97.45%     | 53.64%    |
| <i>In planta</i> (R)-R1      | 30,055,628       | 125,206 (0.42)                | 172,086 (0.01)        | 95.17%     | 98.66%     | 53.78%    |
| <i>In planta</i> (R)-R2      | 30,055,628       | 32,192 (0.11)                 | 607,670 (0.02)        | 92.80%     | 96.76%     | 53.85%    |
| <i>In planta</i> (R)-summary | 60,111,256       | 157,398 (0.26)                | 779,756 (0.01)        | 93.98%     | 97.71%     | 53.82%    |
| <i>In planta</i> (S)-R1      | 29,834,022       | 1,215,010 (0.41)              | 167,362 (0.01)        | 95.22%     | 98.69%     | 53.72%    |
| <i>In planta</i> (S)-R2      | 29,834,022       | 31,069 (0.10)                 | 594,035 (0.02)        | 93.41%     | 97.16%     | 53.78%    |
| <i>In planta</i> (S)-summary | 59,668,044       | 152,579 (0.26)                | 761,397 (0.01)        | 94.31%     | 97.92%     | 53.75%    |
| <b>Summary</b>               | 242,897,730      | 756,374 (0.26)                | 3,780,623 (0.01)      | 93.72%     | 97.43%     |           |

R1: Reads sequencing from the left.

R2: Reads sequencing from the right.

Q20: The percentage of bases with a Phred value N20.

Q30: The percentage of bases with a Phred value N30.

**Supplementary Table 3.** Mapped information of *Xoo* transcriptome.

| Sample           | Raw                    |              | Quality trim   |              |               | Mapped |            | Mapped      |               | Average coverage |       |
|------------------|------------------------|--------------|----------------|--------------|---------------|--------|------------|-------------|---------------|------------------|-------|
|                  | Reads No               | Reads Length | Clear NO       | Clear Length | %             | Reads  | %          | nucleotides | %             |                  |       |
| <i>In planta</i> | <b>Susceptible (S)</b> | 94,542,634   | 9,548,806,034  | 54,406,402   | 5,235,181,135 | 54.83% | 51,316,263 | 94.32%      | 4,899,612,529 | 93.59%           | 92.33 |
|                  | <b>Resistant (R)</b>   | 104,550,144  | 10,559,564,544 | 49,565,710   | 4,697,020,133 | 44.48% | 46,227,949 | 93.27%      | 4,347,491,854 | 92.56%           | 81.92 |
| <i>In vitro</i>  |                        | 92,620,466   | 9,354,667,066  | 45,734,982   | 4,468,510,187 | 47.77% | 45,001,417 | 98.40%      | 4,329,164,062 | 96.88%           | 81.57 |

**Supplementary Table 4.** Up-regulated genes during in planta [susceptible and resistant] growth as compared to the *in vitro*

| nearest_ref_id | Dongjin      | Samgwang    | <i>in vitro</i> | Description                                                                 |
|----------------|--------------|-------------|-----------------|-----------------------------------------------------------------------------|
| ACD56668       | 7.704028117  | 7.805498835 | 7.333039035     | chromosomal replication initiator protein DnaA                              |
| ACD56669       | 8.720815408  | 9.041097842 | 9.509448431     | DNA polymerase III, beta subunit                                            |
| ACD56670       | 7.058078336  | 7.537358197 | 6.068993189     | DNA replication and repair RecF protein                                     |
| ACD56671       | 8.50085781   | 8.626665453 | 8.010500133     | DNA gyrase, B subunit                                                       |
| ACD56672       | 8.74021251   | 8.607108344 | 8.716538267     | caax amino terminal protease family                                         |
| ACD56673       | 9.008039182  | 9.834101243 | 9.952961056     | peptidase M48, Ste24p                                                       |
| ACD56674       | 7.763199085  | 7.933047347 | 8.245362553     | tetratricopeptide repeat domain protein                                     |
| ACD56675       | 8.406566431  | 9.168779909 | 9.515163655     | TonB protein                                                                |
| ACD56676       | 9.79171804   | 9.895770658 | 10.20268708     | biopolymer transport ExbB protein                                           |
| ACD56677       | 9.787058564  | 10.01275023 | 10.04354683     | biopolymer transport ExbD1 protein                                          |
| ACD56678       | 9.370942362  | 9.387080306 | 9.248193249     | biopolymer transport ExbD2 protein                                          |
| ACD56684       | 7.147204925  | 7.224648088 | 7.353155649     | TonB-dependent outer membrane Receptor                                      |
| ACD56685       | 7.497835873  | 7.980939266 | 7.228145276     | conserved hypothetical protein                                              |
| ACD56692       | 7.494943563  | 7.138517562 | 8.003163695     | trans-2-enoyl-CoA reductase                                                 |
| ACD56696       | 9.554726975  | 9.60292708  | 9.105795916     | TonB-dependent receptor                                                     |
| ACD56702       | 0            | 0           | 0               | conserved hypothetical protein                                              |
| ACD56710       | 6.907239205  | 7.882086649 | 8.012764193     | conserved hypothetical protein                                              |
| ACD56711       | 7.434169494  | 6.715097143 | 6.112120437     | neutral protease A                                                          |
| ACD56712       | 9.33238347   | 9.085121868 | 9.542803601     | conserved domain protein                                                    |
| ACD56713       | 10.1769585   | 10.22209451 | 8.67175688      | conserved hypothetical protein                                              |
| ACD56716       | 13.62086129  | 14.33001351 | 12.78700672     | conserved hypothetical protein                                              |
| ACD56717       | 13.67350784  | 14.27720021 | 13.49498055     | conserved hypothetical protein                                              |
| ACD56718       | 11.22344668  | 11.9495094  | 9.655450223     | putative secreted protein                                                   |
| ACD56720       | 7.582036575  | 8.159513141 | 5.477152734     | conserved hypothetical protein                                              |
| ACD56721       | 6.88869455   | 7.251804289 | 7.472000292     | cell division inhibitor                                                     |
| ACD56724       | 7.138783757  | 7.076452206 | 8.19015555      | protease do                                                                 |
| ACD56725       | 9.888408407  | 10.75749002 | 10.43719028     | conserved hypothetical protein                                              |
| ACD56726       | 9.528723675  | 10.19746245 | 8.934286492     | putative membrane protein                                                   |
| ACD56727       | 9.357545407  | 10.34241918 | 8.16371508      | conserved hypothetical protein                                              |
| ACD56732       | 0            | 0           | 6.149846682     | transposase                                                                 |
| ACD56733       | 4.37422573   | 3.928521928 | 1.798440436     | ISXo8 transposase                                                           |
| ACD56734       | 8.279201972  | 7.896786486 | 7.606353389     | Hpa3                                                                        |
| ACD56735       | 6.97472432   | 6.894356997 | 6.516086082     | XopF1 effector                                                              |
| ACD56744       | 9.387515485  | 9.276610651 | 8.254282237     | hypothetical protein                                                        |
| ACD56747       | 9.309053374  | 9.650807633 | 9.600678606     | type III secretion protein HrpB1/HrpK                                       |
| ACD56748       | 8.731729716  | 8.606142376 | 8.197000396     | type III secretion protein HrpB2                                            |
| ACD56749       | 8.23148041   | 8.437548188 | 7.402952354     | type III secretion apparatus lipoprotein, YscJ/HrcJ family                  |
| ACD56750       | 7.719025962  | 8.201908261 | 7.137247341     | type III secretion protein HrpB4                                            |
| ACD56751       | 7.524306634  | 7.17447633  | 6.494041127     | type III secretion apparatus protein, HrpE/YscL family                      |
| ACD56752       | 6.956951088  | 7.215756242 | 6.226776313     | type III secretion apparatus H <sup>+</sup> -transporting two-sector ATPase |
| ACD56753       | 6.608646635  | 6.851024389 | 5.664428795     | type III secretion protein HrpB7                                            |
| ACD56755       | 7.620337143  | 7.535765265 | 7.039631932     | type III secretion apparatus protein SpaR/YscT/HrcT                         |
| ACD56756       | 7.314633089  | 7.627577657 | 8.38011469      | HrpA type III secretion outer membrane pore, YscC/HrcC family               |
| ACD56759       | 7.875190285  | 7.634586008 | 6.509634092     | Hpa2                                                                        |
| ACD56761       | 9.232934114  | 9.128004635 | 7.826078105     | hypothetical protein                                                        |
| ACD56767       | 7.029486015  | 7.180277179 | 6.330432912     | small-conductance mechanosensitive channel                                  |
| ACD56770       | 8.512527153  | 8.254872722 | 9.80890949      | ISXoo11 transposase                                                         |
| ACD56772       | 8.256397418  | 8.788594365 | 7.528071165     | inner membrane protein YedI                                                 |
| ACD56774       | 7.239063834  | 7.272555141 | 7.017131326     | YngK protein                                                                |
| ACD56777       | 8.996046902  | 10.07195837 | 9.32254111      | glycogen synthase                                                           |
| ACD56778       | 8.986342667  | 9.708463165 | 7.735887679     | 1,4-alpha-glucan branching enzyme                                           |
| ACD56779       | 7.518346292  | 7.964000011 | 6.684608376     | malto-oligosyltrehalose trehalohydrolase                                    |
| ACD56780       | 7.866413481  | 8.140016828 | 6.843720096     | 4-alpha-glucanotransferase                                                  |
| ACD56781       | 6.844561409  | 7.359187305 | 6.320269846     | malto-oligosyltrehalose synthase                                            |
| ACD56782       | 6.608625938  | 9.595906408 | 7.816081257     | hypothetical protein                                                        |
| ACD56783       | 7.310730919  | 7.262771391 | 6.780703794     | glycogen debranching enzyme GlgX                                            |
| ACD56784       | 6.932132057  | 6.801016346 | 5.783671419     | NAD-binding domain 4, putative                                              |
| ACD56787       | 9.80150467   | 9.082886171 | 10.42898821     | bacterial pre-peptidase C-terminal domain protein                           |
| ACD56789       | 7.151950119  | 6.814704221 | 7.218800538     | Rhs family protein                                                          |
| ACD56790       | -0.478165293 | 0           | 0               | ISXo8 transposase                                                           |

|          |             |             |             |                                                        |
|----------|-------------|-------------|-------------|--------------------------------------------------------|
| ACD56791 | 9.272415173 | 9.194146165 | 8.279568797 | hypothetical protein                                   |
| ACD56793 | 7.618532334 | 7.817488958 | 7.034468852 | putative secreted protein                              |
| ACD56794 | 8.744484051 | 8.861682476 | 10.00424856 | VirK                                                   |
| ACD56795 | 9.604214059 | 9.420692923 | 10.23340398 | conserved hypothetical protein                         |
| ACD56798 | 8.200354274 | 8.222954255 | 8.574911358 | ISXoo7 transposase                                     |
| ACD56799 | 10.33423976 | 10.98311474 | 10.33007655 | conserved hypothetical protein                         |
| ACD56800 | 11.50367669 | 12.03748518 | 10.95639068 | hypothetical protein                                   |
| ACD56804 | 6.235053032 | 6.709524999 | 6.948682604 | putative ISXoo5 transposase                            |
| ACD56805 | 7.197491934 | 6.540312506 | 7.261023    | ISXoo4 transposase                                     |
| ACD56806 | 0           | 0           | 0           | transposase                                            |
| ACD56811 | 0           | 0           | 0           | hypothetical protein                                   |
| ACD56812 | 8.590388689 | 8.908050297 | 7.412231097 | acriflavin resistance protein                          |
| ACD56814 | 8.478632117 | 7.696265128 | 8.225361702 | ABC transporter ATP-binding protein                    |
| ACD56815 | 7.572055938 | 7.063815694 | 7.471520777 | ABC transporter permease                               |
| ACD56816 | 7.169914983 | 7.314596839 | 6.453945517 | ABC transporter permease                               |
| ACD56823 | 7.114419084 | 7.088374845 | 7.37172438  | ATP-dependent RNA helicase                             |
| ACD56824 | 6.832864704 | 6.619358718 | 6.166564822 | conserved hypothetical protein                         |
| ACD56829 | 6.355541387 | 6.376792197 | 8.65837217  | TonB-dependent receptor                                |
| ACD56830 | 6.754687114 | 7.24216422  | 10.44122201 | conserved hypothetical protein                         |
| ACD56832 | 0           | 0           | 9.05638031  | lipoprotein, putative                                  |
| ACD56833 | 10.90363334 | 11.75923491 | 9.402423744 | conserved hypothetical protein                         |
| ACD56834 | 8.277454794 | 7.843330666 | 7.610463845 | lipoprotein, putative                                  |
| ACD56836 | 7.766045169 | 7.713895106 | 9.14863419  | conserved hypothetical protein                         |
| ACD56838 | 7.145157747 | 7.067606452 | 8.206955732 | glutamate synthase [NADPH] large chain                 |
| ACD56839 | 6.921043516 | 6.732309907 | 6.94373383  | glutamate synthase [NADPH] small chain                 |
| ACD56840 | 7.820083205 | 8.377657371 | 7.560447481 | ISxac1 transposase                                     |
| ACD56841 | 0           | 0           | 4.313398241 | transposase                                            |
| ACD56845 | 7.36677681  | 6.545755284 | 6.775392996 | transposase (IS4 family)                               |
| ACD56846 | 5.728731402 | 5.573722918 | 6.924004843 | ISxac1 transposase                                     |
| ACD56853 | 9.314096033 | 8.292533305 | 8.599912842 | hypothetical protein                                   |
| ACD56855 | 0           | 0           | 6.692106328 | hypothetical protein                                   |
| ACD56861 | 11.77353486 | 10.95875569 | 10.93329969 | hypothetical protein                                   |
| ACD56862 | 0           | 0           | 0           | putative transposase                                   |
| ACD56864 | 8.134128509 | 7.650204487 | 8.464974513 | IS1113 transposase                                     |
| ACD56865 | 0           | 0           | 0           | hypothetical protein                                   |
| ACD56866 | 5.051215468 | 4.921241127 | 3.35119014  | ISXoo5 transposase                                     |
| ACD56867 | 6.763650587 | 6.216146348 | 6.339078578 | transposase                                            |
| ACD56871 | 6.60786734  | 6.86273653  | 6.388310101 | nitrogen regulatory protein P-II                       |
| ACD56872 | 6.88156674  | 6.553469562 | 6.001295589 | conserved hypothetical protein                         |
| ACD56873 | 2.389698961 | 3.421438762 | 3.804962187 | ISXo2 putative transposase                             |
| ACD56874 | 7.356187837 | 7.781359714 | 6.923565191 | conserved hypothetical protein                         |
| ACD56875 | 7.25707664  | 6.879031796 | 7.271360308 | conserved hypothetical protein                         |
| ACD56878 | 6.912074971 | 6.459080739 | 7.292395261 | biosynthetic arginine decarboxylase                    |
| ACD56880 | 2.889037358 | 3.96597817  | 3.607176418 | transposase                                            |
| ACD56881 | 6.013200943 | 5.792941225 | 6.58684279  | Rhs element Vgr protein                                |
| ACD56882 | 6.520547968 | 6.068715948 | 6.662561571 | conserved hypothetical protein                         |
| ACD56883 | 7.379976117 | 7.171887335 | 7.860726963 | conserved hypothetical protein                         |
| ACD56885 | 7.09926364  | 6.730639956 | 7.025017717 | conserved hypothetical protein                         |
| ACD56886 | 6.753965486 | 6.620980752 | 7.327588571 | conserved hypothetical protein                         |
| ACD56890 | 6.656181712 | 6.919125522 | 6.204663083 | threonine dehydratase                                  |
| ACD56891 | 7.401894941 | 7.600344099 | 6.864532845 | conserved hypothetical protein                         |
| ACD56892 | 7.921710047 | 8.42161885  | 9.611701709 | conserved hypothetical protein                         |
| ACD56898 | 10.33339019 | 9.643809301 | 10.34913745 | transposase                                            |
| ACD56899 | 7.913332253 | 8.106829863 | 7.173966895 | conserved hypothetical protein                         |
| ACD56900 | 7.029430799 | 7.216425763 | 6.870894843 | periplasmic glucan biosynthesis protein                |
| ACD56904 | 7.348338663 | 7.49212558  | 6.64679629  | ATP-dependent DNA helicase Rep                         |
| ACD56905 | 9.831604937 | 0           | 8.341096238 | conserved domain protein                               |
| ACD56906 | 10.41140506 | 9.566999664 | 8.637425493 | conserved hypothetical protein                         |
| ACD56907 | 9.871112076 | 9.069205381 | 9.053917738 | hypothetical protein                                   |
| ACD56910 | 6.930725512 | 6.417072743 | 6.722534332 | 5'-nucleotidase, lipoprotein e(P4) family              |
| ACD56911 | 6.562361499 | 6.74192534  | 5.879041601 | orotidine 5'-phosphate decarboxylase                   |
| ACD56916 | 7.249748715 | 7.525787008 | 6.923315599 | conserved hypothetical protein                         |
| ACD56917 | 7.674863133 | 7.953701754 | 7.127622963 | glycerol-3-phosphate acyltransferase                   |
| ACD56918 | 7.445933573 | 7.505922679 | 6.830610274 | NADPH quinone reductase or zn-dependent oxidoreductase |

|          |             |             |             |                                                        |
|----------|-------------|-------------|-------------|--------------------------------------------------------|
| ACD56919 | 6.080659795 | 5.541431204 | 5.327299336 | NADPH quinone reductase or zn-dependent oxidoreductase |
| ACD56921 | 8.22134061  | 7.344260395 | 8.027126399 | conserved hypothetical protein                         |
| ACD56923 | 3.637621838 | 5.321650349 | 4.102044982 | ISXoo3 transposase ORF B                               |
| ACD56924 | 0.979601023 | 1.591909158 | 1.245842452 | ISXo2 putative transposase                             |
| ACD56925 | 8.417033912 | 7.752072839 | 9.514410297 | transposase                                            |
| ACD56930 | 7.963427883 | 8.131435149 | 8.601284238 | fatty acid desaturase                                  |
| ACD56931 | 8.632020958 | 8.335104467 | 7.941587599 | EF hand domain protein                                 |
| ACD56932 | 7.217977079 | 7.016329167 | 6.879730268 | ABC transporter ATP-binding protein                    |
| ACD56933 | 7.217773564 | 7.48094365  | 6.793752854 | ABC transporter amino acid permease                    |
| ACD56935 | 7.631460837 | 8.513443371 | 7.488322191 | conserved hypothetical protein                         |
| ACD56936 | 7.012043433 | 7.092154571 | 6.572826019 | conserved hypothetical protein                         |
| ACD56940 | 8.843362075 | 9.026639628 | 7.464537582 | conserved hypothetical protein                         |
| ACD56941 | 9.046799337 | 8.946993974 | 7.71168762  | conserved hypothetical protein                         |
| ACD56942 | 7.565262052 | 7.566465091 | 6.849711592 | possible malate permease                               |
| ACD56943 | 9.655160387 | 9.90708144  | 10.25561875 | partition protein                                      |
| ACD56944 | 7.368986552 | 7.944032641 | 7.224204313 | putative phosphoglycerate mutase family protein        |
| ACD56945 | 8.816138872 | 8.809112136 | 8.856366388 | Ycel like family                                       |
| ACD56946 | 7.379724919 | 7.643661413 | 7.242126102 | cardiolipin synthase                                   |
| ACD56947 | 8.050452722 | 8.28965467  | 7.948116052 | esterase Ydil                                          |
| ACD56948 | 8.039741585 | 8.292818552 | 6.93479954  | acetyltransferase                                      |
| ACD56949 | 6.95986287  | 6.909137045 | 6.413081209 | hydrolase, alpha/beta fold family protein              |
| ACD56950 | 6.581888994 | 6.487524937 | 6.280832002 | tetratricopeptide repeat family                        |
| ACD56951 | 6.923648379 | 6.828365012 | 7.7478573   | conserved hypothetical protein                         |
| ACD56952 | 7.103885747 | 7.119075995 | 6.772941338 | alcohol dehydrogenase                                  |
| ACD56954 | 9.340753631 | 8.936799865 | 9.021302045 | hypothetical protein                                   |
| ACD56956 | 7.545999248 | 7.458053843 | 8.38610822  | glutamine synthetase, type I                           |
| ACD56957 | 7.43970624  | 6.043217625 | 6.215263121 | nitrogen regulatory protein P-II                       |
| ACD56958 | 7.292100725 | 7.457093543 | 6.74823311  | ammonium transporter                                   |
| ACD56959 | 8.034413826 | 8.408669408 | 8.402116721 | two-component system sensor protein                    |
| ACD56960 | 7.253128912 | 7.346309836 | 6.638553207 | nitrogen regulation protein NR(I)                      |
| ACD56961 | 7.534645275 | 7.654457023 | 6.264406943 | superoxide dismutase                                   |
| ACD56962 | 8.201726967 | 7.904351624 | 7.449487092 | superoxide dismutase                                   |
| ACD56968 | 7.32297367  | 6.76008785  | 5.651800837 | hemagglutinin                                          |
| ACD56969 | 6.283149487 | 5.887939499 | 6.477664377 | hemagglutinin-like protein                             |
| ACD56972 | 6.996467839 | 6.940178499 | 7.022556461 | exodeoxyribonuclease V, gamma subunit                  |
| ACD56973 | 6.85127431  | 6.727280627 | 6.887890772 | exodeoxyribonuclease V beta chain                      |
| ACD56974 | 6.571124622 | 6.190334353 | 6.74582892  | exodeoxyribonuclease V, alpha subunit                  |
| ACD56975 | 8.131198468 | 8.898404883 | 9.536892155 | plasmid maintenance system killer protein              |
| ACD56976 | 6.950293432 | 7.72463663  | 8.372133735 | addiction module antidote protein, HigA family         |
| ACD56977 | 7.368934187 | 9.385942189 | 10.22491815 | hypothetical protein                                   |
| ACD56978 | 7.017465428 | 6.923101629 | 7.309912848 | XopQ effector                                          |
| ACD56980 | 7.6960286   | 8.532036373 | 7.4563462   | paar motif family                                      |
| ACD56981 | 8.388714778 | 7.752293664 | 9.308759944 | conserved hypothetical protein                         |
| ACD56982 | 7.72396805  | 7.583729672 | 8.195446032 | hypothetical protein                                   |
| ACD56985 | 6.528041462 | 6.065259941 | 6.112975303 | hypothetical protein                                   |
| ACD56987 | 7.390392546 | 7.631853672 | 7.219352477 | conserved hypothetical protein                         |
| ACD56990 | 7.291999464 | 6.74910515  | 6.477623905 | conserved hypothetical protein                         |
| ACD56991 | 6.612979044 | 6.715824748 | 6.837085441 | conserved hypothetical protein                         |
| ACD56992 | 0           | 10.49782191 | 10.46813526 | conserved hypothetical protein                         |
| ACD56995 | 8.419471474 | 8.439880739 | 9.081858876 | ISXo3 transposase ORF B                                |
| ACD56997 | 8.439905665 | 9.825784038 | 10.16460529 | oxidoreductase                                         |
| ACD56998 | 8.995207486 | 9.695257876 | 10.02197934 | DesA3_2                                                |
| ACD57003 | 0           | 0           | 0           | hypothetical protein                                   |
| ACD57004 | 10.39843375 | 10.76199162 | 9.917518281 | conserved hypothetical protein                         |
| ACD57009 | 6.935789738 | 6.904893486 | 6.555877493 | hexuranate transporter                                 |
| ACD57010 | 9.274138169 | 8.77825458  | 8.712344718 | xylanase                                               |
| ACD57011 | 7.749775591 | 6.971853901 | 7.218044911 | glycosyl hydrolase family 10                           |
| ACD57012 | 10.80491348 | 10.50472962 | 9.677342624 | lipoprotein, putative                                  |
| ACD57013 | 7.52994585  | 7.250127843 | 13.5828829  | glycosyl hydrolase family 10                           |
| ACD57014 | 7.762667726 | 7.071977136 | 9.883193125 | glucuronate isomerase                                  |
| ACD57015 | 9.164361414 | 8.995201831 | 11.00108443 | conserved hypothetical protein                         |
| ACD57016 | 8.597929633 | 9.117588561 | 7.32898901  | bleomycin resistance protein                           |
| ACD57025 | 6.842991399 | 6.915114518 | 6.262803331 | sal operon transcriptional repressor                   |
| ACD57027 | 7.975847968 | 7.672213165 | 6.598427738 | hypothetical protein                                   |

|          |             |             |             |                                                                       |
|----------|-------------|-------------|-------------|-----------------------------------------------------------------------|
| ACD57028 | 7.666018016 | 7.878418822 | 7.960795486 | ATPase of the PP-loop superfamily                                     |
| ACD57029 | 7.132813297 | 6.84067723  | 6.585754263 | recombination associated protein RdgC                                 |
| ACD57030 | 8.560936538 | 8.264883552 | 9.793780486 | protein of unknown function                                           |
| ACD57033 | 7.984674789 | 8.343598807 | 9.345899737 | conserved hypothetical protein                                        |
| ACD57034 | 11.12393385 | 11.43299593 | 13.73007735 | conserved domain protein                                              |
| ACD57035 | 9.187891436 | 9.284766276 | 10.33239466 | sec-independent protein translocase                                   |
| ACD57036 | 7.914086097 | 7.921477987 | 7.219323432 | twin arginine-targeting protein translocase TatC                      |
| ACD57041 | 6.520499253 | 6.158290569 | 6.555648996 | skwp protein 4                                                        |
| ACD57043 | 6.978138415 | 7.229011037 | 7.312156888 | glycyl-tRNA synthetase, alpha subunit                                 |
| ACD57045 | 6.623897581 | 6.342465854 | 6.785929746 | glycyl-tRNA synthetase, beta subunit                                  |
| ACD57046 | 7.348843211 | 7.02219024  | 7.29525466  | tetratricopeptide repeat family                                       |
| ACD57048 | 9.201241771 | 7.777840495 | 8.003242417 | hypothetical protein                                                  |
| ACD57053 | 8.385569088 | 8.365167596 | 8.550211927 | conserved hypothetical protein                                        |
| ACD57055 | 8.175280073 | 8.629560623 | 7.063697072 | conserved hypothetical protein                                        |
| ACD57058 | 6.925928231 | 8.048579509 | 5.605218735 | putative secreted protein                                             |
| ACD57059 | 5.569418178 | 6.086495062 | 5.935631824 | conserved hypothetical protein                                        |
| ACD57060 | 11.00886277 | 9.914694568 | 9.347670085 | putative membrane protein                                             |
| ACD57061 | 8.842447777 | 9.003728714 | 8.000450772 | conserved hypothetical protein                                        |
| ACD57062 | 8.750603155 | 6.884964165 | 7.1854305   | hypothetical protein                                                  |
| ACD57064 | 7.553276016 | 7.488932693 | 7.794409368 | acyl-CoA dehydrogenase                                                |
| ACD57065 | 7.181838026 | 7.236942195 | 7.21172285  | acyl-CoA carboxyltransferase beta chain                               |
| ACD57066 | 6.798556044 | 6.696188608 | 6.592243233 | biotin carboxylase                                                    |
| ACD57067 | 6.662832127 | 6.456186827 | 6.661136757 | dipeptidyl aminopeptidase                                             |
| ACD57071 | 0           | 0           | 0           | transposase                                                           |
| ACD57074 | 9.064917871 | 8.050469047 | 8.811522408 | ISxac1 transposase                                                    |
| ACD57087 | 6.212427319 | 6.728015724 | 6.305051221 | alpha/beta hydrolase fold                                             |
| ACD57088 | 8.146268269 | 8.241158517 | 8.094246628 | conserved hypothetical protein                                        |
| ACD57090 | 6.927019385 | 6.885122841 | 7.059398544 | deoxyribonuclease TatD                                                |
| ACD57095 | 7.641596603 | 7.20982374  | 7.745338188 | MFS transporter                                                       |
| ACD57098 | 6.985375191 | 6.77276983  | 6.036411019 | NAD-dependent deacetylase                                             |
| ACD57099 | 7.383445102 | 6.989604538 | 6.21985388  | FMN oxidoreductase                                                    |
| ACD57100 | 7.474379256 | 7.396365026 | 6.731033858 | dehydrogenase                                                         |
| ACD57101 | 7.505041382 | 7.377748458 | 7.322270694 | conserved hypothetical protein                                        |
| ACD57102 | 7.615879719 | 7.479262902 | 7.088014355 | formyltetrahydrofolate deformylase                                    |
| ACD57109 | 7.526507064 | 8.36732301  | 7.92150179  | FMN reductase                                                         |
| ACD57110 | 8.871427853 | 9.438307408 | 9.564869705 | conserved hypothetical protein                                        |
| ACD57111 | 7.85232975  | 8.355787143 | 7.931635786 | 5-methyltetrahydropteroyltrylglutamate-homocysteine methyltransferase |
| ACD57112 | 10.57858026 | 8.499738279 | 8.723640468 | hypothetical protein                                                  |
| ACD57114 | 6.740725224 | 7.050958725 | 6.617311708 | hypothetical protein                                                  |
| ACD57117 | 10.69569809 | 10.58909868 | 8.747410898 | hypothetical protein                                                  |
| ACD57119 | 8.792292503 | 8.550235019 | 8.571790559 | transcriptional regulatory protein                                    |
| ACD57123 | 9.678473381 | 9.719455563 | 7.961768007 | amino acid transporter                                                |
| ACD57125 | 7.094299419 | 7.134539267 | 6.865522959 | AMP-ligase                                                            |
| ACD57130 | 8.778569994 | 9.131638354 | 7.994217647 | xanthomonadin biosynthesis acyl carrier protein                       |
| ACD57131 | 7.927463912 | 8.417046574 | 6.751825207 | ketosynthase                                                          |
| ACD57132 | 7.69341726  | 8.221036037 | 7.212744413 | acyltransferase                                                       |
| ACD57133 | 7.460726184 | 8.015961361 | 7.35264378  | xanthomonadin biosynthesis dehydratase                                |
| ACD57134 | 7.209628818 | 7.723367427 | 7.530320495 | xanthomonadin biosynthesis acyltransferase                            |
| ACD57135 | 7.438101522 | 8.078951341 | 9.464419139 | fatty acyl CoA synthetase                                             |
| ACD57136 | 7.093222111 | 6.942397208 | 6.960604378 | membrane protein involved in xanthomonadin export                     |
| ACD57137 | 7.377904593 | 7.101345421 | 6.965703491 | xanthomonadin biosynthesis phosphotransferase/dehydratase             |
| ACD57139 | 9.367432225 | 9.184394364 | 10.04334177 | ISXoo2 transposase                                                    |
| ACD57140 | 9.057731852 | 9.496306548 | 9.046695676 | transposase                                                           |
| ACD57145 | 0           | 1.827981573 | 0           | transposase                                                           |
| ACD57147 | 15.61656894 | 15.87874545 | 16.64203759 | hypothetical protein                                                  |
| ACD57149 | 7.698544937 | 8.00114919  | 8.004675539 | ATP-dependent RNA helicase RhlB                                       |
| ACD57150 | 6.45705249  | 7.29586075  | 6.621631399 | cell division ATP-binding protein FtsE                                |
| ACD57151 | 7.073348967 | 7.363687985 | 6.834812326 | cell division protein                                                 |
| ACD57152 | 7.44681037  | 8.220465395 | 7.183546063 | response regulator protein                                            |
| ACD57153 | 7.910612752 | 8.377427461 | 7.211849368 | uracil-DNA glycosylase                                                |
| ACD57154 | 9.662593613 | 10.43756483 | 11.65001954 | alternative sigma factor RpoH                                         |
| ACD57157 | 9.933855862 | 8.939514571 | 11.4491796  | conserved hypothetical protein                                        |
| ACD57158 | 10.27722927 | 10.36272192 | 11.68465659 | protein of unknown function                                           |
| ACD57159 | 0           | 0           | 0           | ISxac1 transposase                                                    |

|          |             |             |              |                                                                |
|----------|-------------|-------------|--------------|----------------------------------------------------------------|
| ACD57160 | 7.325044554 | 7.437419184 | 8.592763484  | ISxac1 transposase                                             |
| ACD57161 | 10.4100909  | 11.01532445 | 12.4690974   | chaperonin GroS                                                |
| ACD57162 | 9.990813079 | 10.34540525 | 11.90646599  | chaperonin GroL                                                |
| ACD57164 | 6.493828236 | 6.595794545 | 6.635768899  | TonB-dependent outer membrane receptor                         |
| ACD57165 | 6.805666496 | 6.345247329 | 6.689369057  | TonB-dependent outer membrane receptor                         |
| ACD57166 | 8.041407274 | 7.609695873 | 9.473583998  | phospho-2-dehydro-3-deoxyheptonate aldolase                    |
| ACD57168 | 7.225650904 | 7.485958079 | 5.537960722  | conserved hypothetical protein                                 |
| ACD57169 | 6.583800363 | 6.775814367 | 6.21990614   | conserved hypothetical protein                                 |
| ACD57171 | 7.029375581 | 7.043388254 | 6.985249941  | conserved hypothetical protein                                 |
| ACD57173 | 7.683710488 | 8.695190005 | 6.1462866    | conserved hypothetical protein                                 |
| ACD57174 | 6.448187354 | 5.242499616 | 5.834488748  | conserved hypothetical protein                                 |
| ACD57178 | 6.439313955 | 6.7083528   | 6.009006705  | glutamate-ammonia-ligase adenyltransferase                     |
| ACD57182 | 6.027695934 | 6.241607595 | 5.572471347  | proteinase                                                     |
| ACD57183 | 6.522286489 | 6.192576886 | 6.137989122  | proteinase                                                     |
| ACD57186 | 7.839588036 | 7.592823271 | 7.747273258  | nitroreductase                                                 |
| ACD57187 | 8.124503911 | 8.140896218 | 7.969075643  | Ycel like family                                               |
| ACD57192 | 0           | 0           | 9.131288514  | hypothetical protein                                           |
| ACD57193 | 10.16937387 | 8.489474698 | 9.361009447  | conserved hypothetical protein                                 |
| ACD57194 | 10.46473973 | 11.30982306 | 9.852245468  | conserved hypothetical protein                                 |
| ACD57195 | 10.48237438 | 11.67967802 | 11.47485174  | transposase                                                    |
| ACD57196 | 7.435336892 | 6.42248027  | 8.509834373  | ISPsy21, transposase OrfB                                      |
| ACD57200 | 8.748444461 | 8.323518691 | 0            | hypothetical protein                                           |
| ACD57201 | 6.682938419 | 5.977199772 | 6.210079048  | lipase family                                                  |
| ACD57202 | 7.936390599 | 8.100567733 | 7.619618424  | conserved hypothetical protein                                 |
| ACD57203 | 0           | 8.447393228 | 10.25054714  | conserved hypothetical protein                                 |
| ACD57205 | 7.482477238 | 6.78217264  | 7.038776358  | arabinogalactan endo-1,4-beta-galactosidase                    |
| ACD57206 | 7.46562354  | 6.903689072 | 7.159205324  | arabinogalactan endo-1,4-beta-galactosidase                    |
| ACD57207 | 8.026102883 | 8.129416975 | 8.044798454  | pyruvate dehydrogenase E1 component                            |
| ACD57208 | 6.855279633 | 5.083804795 | 0            | ISXoo3 transposase ORF A                                       |
| ACD57209 | 6.105726262 | 5.480071198 | 5.289425053  | ISXoo3 transposase ORF B                                       |
| ACD57211 | 6.998319635 | 6.961924244 | 7.60783332   | DNA polymerase I                                               |
| ACD57213 | 4.401705548 | 4.55196506  | 4.712397685  | transposase                                                    |
| ACD57214 | 6.939285356 | 6.417945317 | 6.604840813  | ISXoo6 transposase                                             |
| ACD57216 | 7.597508827 | 7.949966743 | 7.292800151  | site-specific recombinase                                      |
| ACD57218 | 9.176542192 | 9.370565361 | 8.871289228  | proteinase inhibitor                                           |
| ACD57220 | 7.621202064 | 7.61321485  | 7.103906723  | MFS transporter                                                |
| ACD57221 | 6.898933872 | 6.677268619 | 6.33756125   | putative signal protein with HD-GYP domain                     |
| ACD57222 | 7.520846508 | 7.371811486 | 6.674997269  | transcriptional regulator MarR family                          |
| ACD57227 | 0           | 8.524757173 | 7.530679438  | hypothetical protein                                           |
| ACD57228 | 7.423485731 | 7.672701125 | 8.551231449  | ferredoxin                                                     |
| ACD57235 | 5.907231993 | 5.784090379 | 5.450647114  | conserved hypothetical protein                                 |
| ACD57236 | 7.381032402 | 7.703875896 | 6.819221104  | hypothetical tRNA/rRNA methyltransferase YibK                  |
| ACD57244 | 11.00361629 | 11.8675915  | 13.62763647  | conserved hypothetical protein                                 |
| ACD57251 | 5.725776596 | 4.554736183 | 5.5377185    | ISXo5 transposase                                              |
| ACD57252 | 8.109355335 | 6.444450077 | 7.644281722  | putative transposase                                           |
| ACD57253 | 0           | 0           | -0.459355699 | ISXo5 transposase                                              |
| ACD57254 | 4.429877032 | 5.457640254 | 6.018462817  | transposase (IS4 family)                                       |
| ACD57256 | 7.385327491 | 7.153116244 | 8.48756272   | conserved hypothetical protein                                 |
| ACD57261 | 6.082089416 | 6.557872615 | 5.619013837  | N-acyl-L-amino acid amidohydrolase                             |
| ACD57263 | 8.157058873 | 8.131321958 | 9.14974712   | 7-cyano-7-deazaguanine reductase                               |
| ACD57265 | 0           | 0.638963514 | -0.444768893 | IS1113 transposase                                             |
| ACD57270 | 8.395752612 | 8.211917489 | 8.62357061   | isocitrate dehydrogenase, NADP-dependent                       |
| ACD57271 | 7.947110898 | 8.535232601 | 8.029143641  | hypothetical protein                                           |
| ACD57272 | 8.892764402 | 7.921263744 | 9.008661115  | conserved domain protein                                       |
| ACD57276 | 7.059658115 | 7.346150243 | 7.114533608  | anthranilate synthase component II                             |
| ACD57277 | 10.67541901 | 11.14614223 | 10.63043095  | molybdopterin biosynthesis                                     |
| ACD57278 | 7.530203429 | 7.65881843  | 7.948449001  | nitrilotriacetate monooxygenase component B                    |
| ACD57279 | 7.764108585 | 7.255519616 | 6.880073254  | anthranilate phosphoribosyltransferase                         |
| ACD57280 | 7.81961071  | 8.044038867 | 8.540562041  | indole-3-glycerol phosphate synthase                           |
| ACD57281 | 7.238987432 | 7.401144048 | 6.046746417  | conserved hypothetical protein, putative                       |
| ACD57283 | 8.93619623  | 9.26728765  | 10.2820459   | S-adenosylmethionine decarboxylase proenzyme (AdoMetDC)(SamDC) |
| ACD57284 | 8.923003548 | 8.168531727 | 8.572810106  | SugE                                                           |
| ACD57286 | 11.50385058 | 12.04150516 | 11.59900623  | ribosomal protein L13                                          |
| ACD57287 | 9.649457386 | 10.17480088 | 9.912059997  | ribosomal protein S9                                           |



|          |             |             |              |                                                                                                                      |
|----------|-------------|-------------|--------------|----------------------------------------------------------------------------------------------------------------------|
| ACD57288 | 9.046823888 | 9.61479817  | 8.047434781  | pyrophosphatase, MutT/nudix family                                                                                   |
| ACD57289 | 8.001543309 | 8.743097524 | 10.91041038  | bacterioferritin                                                                                                     |
| ACD57293 | 9.540521359 | 10.32200699 | 7.532659824  | putative membrane protein                                                                                            |
| ACD57294 | 9.344970488 | 9.822844845 | 7.303488527  | cytochrome c oxidase, subunit II                                                                                     |
| ACD57295 | 8.757523355 | 9.188892929 | 7.497205173  | cytochrome c oxidase, subunit I                                                                                      |
| ACD57296 | 11.16798884 | 11.62563579 | 10.72395952  | conserved hypothetical protein                                                                                       |
| ACD57297 | 10.06688299 | 10.4148966  | 7.694601653  | cytochrome C oxidase assembly protein CtaG                                                                           |
| ACD57298 | 8.98031669  | 9.359338872 | 7.082276802  | cytochrome C oxidase subunit III                                                                                     |
| ACD57300 | 7.860559373 | 8.340655728 | 7.311984394  | conserved hypothetical protein                                                                                       |
| ACD57301 | 7.375777972 | 7.826262462 | 7.134005259  | conserved hypothetical protein                                                                                       |
| ACD57302 | 8.056648552 | 8.220818446 | 7.047243904  | cytochrome oxidase assembly protein                                                                                  |
| ACD57303 | 6.720538412 | 6.6441447   | 5.846954584  | protoheme IX farnesyltransferase                                                                                     |
| ACD57306 | 6.423073879 | 6.619757796 | 6.513121181  | hypothetical protein                                                                                                 |
| ACD57307 | 10.92632565 | 10.07630789 | 11.51396441  | hypothetical protein                                                                                                 |
| ACD57308 | 0           | 0           | -0.960457287 | ISXo8 transposase                                                                                                    |
| ACD57309 | 0           | 3.121325464 | 0            | ISXo1 transposase                                                                                                    |
| ACD57314 | 6.102513267 | 5.978850003 | 6.080700296  | conserved hypothetical protein                                                                                       |
| ACD57315 | 7.210476536 | 7.830318715 | 6.885488952  | conserved hypothetical protein                                                                                       |
| ACD57317 | 7.609969141 | 7.846881894 | 7.282133396  | multidrug efflux protein                                                                                             |
| ACD57318 | 8.311852739 | 8.377908929 | 8.824035884  | signal peptide peptidase SppA, 67K type                                                                              |
| ACD57320 | 7.650405564 | 7.499080498 | 7.701743104  | tropinone reductase-II                                                                                               |
| ACD57330 | 8.614963766 | 9.11914864  | 7.885812272  | peptide deformylase                                                                                                  |
| ACD57331 | 6.728519185 | 6.567816171 | 6.388282545  | methionyl-tRNA formyltransferase                                                                                     |
| ACD57332 | 7.140512829 | 7.279276273 | 6.705162355  | ribosomal RNA small subunit methyltransferase B                                                                      |
| ACD57333 | 7.511879131 | 7.368200866 | 6.753444085  | dolichyl-phosphate-mannose-protein mannosyltransferase                                                               |
| ACD57334 | 7.184240616 | 7.399717984 | 6.628385753  | O-Antigen Polymerase family                                                                                          |
| ACD57336 | 7.083011207 | 7.259837401 | 7.151128194  | CDP-Glycerolx3aPoly(glycerophosphate) glycerophosphotransferase family                                               |
| ACD57341 | 7.452463652 | 6.744228384 | 6.423068835  | N-acetyltransferase                                                                                                  |
| ACD57343 | 7.803252872 | 7.797227031 | 7.709001075  | D-tyrosyl-tRNA(Tyr) deacylase                                                                                        |
| ACD57344 | 8.559377091 | 8.84350341  | 9.150072197  | RNA polymerase sigma-70 factor                                                                                       |
| ACD57345 | 10.11467935 | 10.49555527 | 8.794961648  | conserved hypothetical protein                                                                                       |
| PXO_rna2 | 0           | 0           | 0            | XO_rna2 cDNA:pseudogene<br>chromosome:GCA_000019585.1:Chromosome:718477:718552:1 gene:PXO_rna2<br>transcript:PXO_rna |
| ACD57353 | 5.423621868 | 5.419319774 | 5.256312493  | transposase                                                                                                          |
| ACD57359 | 9.815605848 | 10.00244937 | 11.2981657   | transposase                                                                                                          |
| ACD57360 | 7.334630842 | 6.991521846 | 6.2239071    | ABC transporter ATP-binding protein                                                                                  |
| ACD57361 | 7.293848655 | 7.287232171 | 6.087189128  | membrane protein, putative                                                                                           |
| ACD57362 | 7.081659187 | 7.235315404 | 6.427711756  | conserved hypothetical protein                                                                                       |
| ACD57363 | 6.441342377 | 6.556722155 | 5.762707584  | TonB-dependent outer membrane Receptor                                                                               |
| ACD57368 | 11.19926745 | 11.56222334 | 11.84555278  | conserved hypothetical protein                                                                                       |
| ACD57372 | 0           | 0           | 0            | ISXo8 transposase                                                                                                    |
| ACD57375 | 0           | 0           | 0            | ISXoo12 transposase                                                                                                  |
| ACD57376 | 0           | 0           | 0            | ISXoo12 transposase                                                                                                  |
| ACD57377 | 3.424290603 | 4.629700494 | 5.087518002  | ISXoo11 transposase                                                                                                  |
| ACD57380 | 6.127373274 | 7.242002211 | 6.726354417  | peptidase M22, glycoprotease                                                                                         |
| ACD57381 | 7.929234733 | 8.067869927 | 7.677346148  | dihydroneopterin aldolase                                                                                            |
| ACD57382 | 6.63750302  | 6.57250318  | 6.031273878  | periplasmic beta-glucosidase                                                                                         |
| ACD57389 | 9.234601909 | 9.361224439 | 7.865386859  | membrane protein                                                                                                     |
| ACD57392 | 0           | 0           | 0            | putative ISXo8 transposase                                                                                           |
| ACD57404 | 7.046862076 | 6.553736796 | 6.0501904    | N-acetylmuramoyl-L-alanine amidase                                                                                   |
| ACD57405 | 5.79607596  | 6.083264436 | 6.022154722  | D-alanyl-D-alanine dipeptidase                                                                                       |
| ACD57406 | 9.357191286 | 9.251506081 | 9.202633209  | conserved domain protein                                                                                             |
| ACD57407 | 7.769745297 | 7.893471428 | 7.556513718  | conserved hypothetical protein                                                                                       |
| ACD57408 | 14.27246941 | 14.16405054 | 12.27680778  | EF hand domain protein                                                                                               |
| ACD57409 | 8.616331964 | 9.10183914  | 7.278449458  | conserved hypothetical protein                                                                                       |
| ACD57410 | 8.937041248 | 9.038433438 | 8.876974239  | HAD superfamily hydrolase                                                                                            |
| ACD57411 | 6.763929386 | 6.838334129 | 7.100346961  | conserved hypothetical protein                                                                                       |
| ACD57412 | 7.697627886 | 8.485696502 | 6.901965011  | conserved hypothetical protein                                                                                       |
| ACD57413 | 5.570687576 | 5.904821249 | 5.730574748  | ISXo3 transposase ORF B                                                                                              |
| ACD57415 | 6.906000659 | 6.85122433  | 5.647982163  | uroporphyrinogen-III synthase                                                                                        |
| ACD57416 | 7.209092647 | 7.034666927 | 6.700939026  | conserved hypothetical protein                                                                                       |
| ACD57417 | 7.153785073 | 7.2359472   | 6.912566041  | porphyrin biosynthesis protein                                                                                       |
| ACD57418 | 10.46350394 | 10.93183077 | 9.366512375  | hypothetical protein                                                                                                 |

|          |             |             |             |                                                             |
|----------|-------------|-------------|-------------|-------------------------------------------------------------|
| ACD57421 | 7.526843489 | 7.589239157 | 7.60347057  | conserved hypothetical protein                              |
| ACD57422 | 9.620388466 | 9.301891682 | 0           | IS1478 transposase                                          |
| ACD57429 | 7.115688751 | 6.837350404 | 6.562137081 | tryptophan 2,3-dioxygenase                                  |
| ACD57430 | 7.879816022 | 7.926527282 | 9.077170884 | di-tripeptide transporter                                   |
| ACD57431 | 7.936773369 | 8.106965923 | 8.865918815 | lipoprotein, putative                                       |
| ACD57433 | 7.763936023 | 7.595645381 | 7.797894932 | 4-hydroxyphenylpyruvate dioxygenase                         |
| ACD57434 | 6.882398504 | 7.220542783 | 6.903640874 | homogentisate 1,2-dioxygenase                               |
| ACD57441 | 10.43274023 | 0           | 0           | conserved hypothetical protein                              |
| ACD57447 | 8.499124359 | 8.163579238 | 8.424099087 | hypothetical protein                                        |
| ACD57448 | 0           | 0           | 0           | ISXo7 transposase                                           |
| ACD57450 | 7.467385461 | 6.276744166 | 5.750812819 | DnaJ domain protein                                         |
| ACD57451 | 0           | 10.39121136 | 9.006283996 | hypothetical protein                                        |
| ACD57452 | 7.093105882 | 6.717498217 | 7.345884217 | ribulose-phosphate 3-epimerase                              |
| ACD57453 | 7.44805021  | 7.145779337 | 7.760959407 | N-acetyltransferase                                         |
| ACD57454 | 8.583974066 | 9.16304329  | 8.980833618 | conserved hypothetical protein                              |
| ACD57455 | 6.77002292  | 6.562086696 | 6.449561375 | anthranilate synthase component I                           |
| ACD57456 | 6.419795048 | 6.499823569 | 5.624524982 | threonine aldolase                                          |
| ACD57458 | 4.949684331 | 3.564012265 | 4.937871652 | ISXoo3 transposase ORF B                                    |
| ACD57459 | 7.173747083 | 6.770710138 | 6.750807461 | putative secreted protein                                   |
| ACD57463 | 8.642271962 | 8.033054021 | 7.598179079 | conserved hypothetical protein                              |
| ACD57464 | 7.695722447 | 6.239909707 | 6.026636309 | conserved hypothetical protein                              |
| ACD57465 | 7.107101969 | 6.516186961 | 6.671109344 | conserved hypothetical protein                              |
| ACD57467 | 7.425131962 | 9.876687297 | 9.873687105 | hypothetical protein                                        |
| ACD57469 | 7.651101933 | 7.392635124 | 6.587972487 | drug/metabolite transporter superfamily protein             |
| ACD57475 | 8.224763833 | 8.267933683 | 7.033918499 | D-serine/D-alanine/glycine transporter                      |
| ACD57477 | 8.252277508 | 8.48029744  | 7.269902767 | magnesium and cobalt transport protein                      |
| ACD57480 | 11.05918896 | 11.6128685  | 10.28181414 | avidin family                                               |
| ACD57484 | 7.348312102 | 5.434995109 | 7.263963968 | conserved hypothetical protein                              |
| ACD57486 | 11.0204522  | 9.798261173 | 7.494751603 | endonuclease                                                |
| ACD57487 | 0           | 9.522785515 | 0           | conserved domain protein                                    |
| ACD57488 | 10.03287225 | 7.293066948 | 8.148161316 | endonuclease                                                |
| ACD57490 | 3.387941488 | 5.003912509 | 3.026769966 | ISXoo11 transposase                                         |
| ACD57492 | 6.689802338 | 6.152777658 | 6.790120385 | conserved hypothetical protein                              |
| ACD57495 | 6.724090873 | 7.658411446 | 7.419564172 | Putative signal protein with GAF,PAS(PAC) and GGDEF domains |
| ACD57498 | 9.06087153  | 9.419288168 | 8.818121975 | hypothetical protein                                        |
| ACD57501 | 7.044634548 | 7.273842212 | 6.818991123 | sulfate permease                                            |
| ACD57502 | 10.73533601 | 10.20350707 | 8.449536614 | hypothetical protein                                        |
| ACD57503 | 5.48050749  | 6.593925895 | 6.546375922 | hypothetical protein                                        |
| ACD57504 | 6.238532761 | 5.939003197 | 6.271134299 | Putative signal protein with GGDEF domain                   |
| ACD57505 | 0           | 9.154453593 | 0           | hypothetical protein                                        |
| ACD57506 | 6.762109587 | 6.896090168 | 7.326096865 | aminopeptidase                                              |
| ACD57508 | 0           | 3.640458974 | 5.192336218 | ISXoo13 transposase                                         |
| ACD57511 | 7.748467942 | 8.185757546 | 7.12188573  | glucans biosynthesis glucosyltransferase H                  |
| ACD57512 | 6.828415791 | 6.673217192 | 6.532796947 | carboxylesterase                                            |
| ACD57513 | 6.802787754 | 7.333441624 | 6.164337779 | two-component system sensor protein                         |
| ACD57514 | 7.429080294 | 7.662903317 | 7.163418223 | two-component system regulatory protein                     |
| ACD57515 | 6.938826819 | 7.469617399 | 7.555417396 | porphobilinogen deaminase                                   |
| ACD57517 | 8.085945092 | 7.992082942 | 8.235698343 | transcriptional regulator                                   |
| ACD57519 | 6.713901978 | 6.490343889 | 6.365358347 | conserved hypothetical protein                              |
| ACD57520 | 6.635091214 | 6.530654471 | 6.489647293 | prolyl oligopeptidase family protein                        |
| ACD57521 | 8.893362211 | 8.963832441 | 7.532270199 | hypothetical protein                                        |
| ACD57522 | 9.473291752 | 10.34951346 | 8.74634972  | conserved hypothetical protein                              |
| ACD57525 | 7.795546184 | 8.006511225 | 7.703536799 | protease II                                                 |
| ACD57526 | 7.811432496 | 7.135493828 | 7.502807941 | conserved hypothetical protein                              |
| ACD57527 | 9.489496775 | 10.21925324 | 10.58681165 | lipoprotein, putative                                       |
| ACD57528 | 7.070035051 | 7.679423798 | 6.92150774  | diaminopimelate epimerase                                   |
| ACD57529 | 7.085488393 | 6.920233743 | 6.016108494 | protein of unknown function                                 |
| ACD57530 | 7.10659958  | 6.770221189 | 6.125035246 | tyrosine recombinase XerC                                   |
| ACD57532 | 9.979653836 | 9.461385311 | 12.60431461 | ATP-dependent protease HslV                                 |
| ACD57533 | 7.324342588 | 7.277557081 | 8.660263364 | heat shock protein HslVU, ATPase subunit HslU               |
| ACD57537 | 11.16530902 | 11.38060176 | 13.71067731 | hypothetical protein                                        |
| ACD57540 | 6.143577091 | 5.85993974  | 6.010509084 | multidrug resistance efflux pump                            |
| ACD57541 | 6.177433491 | 5.837824694 | 7.530125379 | isrso5-transposase protein                                  |
| ACD57542 | 9.414010764 | 9.022656323 | 8.980091011 | isrso5-transposase protein                                  |

|          |             |             |             |                                                                            |
|----------|-------------|-------------|-------------|----------------------------------------------------------------------------|
| ACD57543 | 7.504739553 | 7.461070114 | 7.746668827 | ElaA                                                                       |
| ACD57544 | 7.75443993  | 8.06301211  | 7.839197488 | cytosine deaminase                                                         |
| ACD57545 | 7.722623128 | 7.072234454 | 7.875374617 | transposase                                                                |
| ACD57547 | 6.920317123 | 6.807625402 | 7.35146049  | rod shape-determining protein                                              |
| ACD57548 | 7.511270357 | 7.241611408 | 7.256916297 | rod shape-determining protein                                              |
| ACD57549 | 8.70215883  | 8.880936481 | 9.054780659 | rod shape-determining protein MreD                                         |
| ACD57550 | 6.83406647  | 6.898522789 | 6.317888308 | penicillin-binding protein 2                                               |
| ACD57551 | 7.141565626 | 6.809028508 | 6.434042692 | rod shape-determining protein RodA                                         |
| ACD57552 | 8.516834627 | 8.361316569 | 8.541534199 | transposase                                                                |
| ACD57553 | 7.314877757 | 7.140359445 | 7.705791334 | conserved hypothetical protein                                             |
| ACD57554 | 6.778760522 | 6.608387902 | 7.303351528 | conserved hypothetical protein                                             |
| ACD57555 | 6.742855081 | 6.640664305 | 6.958517916 | Rhs element Vgr protein                                                    |
| ACD57556 | 7.424989251 | 7.294510475 | 8.747921061 | LysM domain protein                                                        |
| ACD57557 | 5.989995013 | 5.407947519 | 5.735405739 | conserved hypothetical protein                                             |
| ACD57558 | 6.298658316 | 6.005730081 | 6.42669079  | endopolygalacturonase                                                      |
| ACD57559 | 8.039763514 | 8.312560808 | 9.424523243 | lytic murein transglycosylase B                                            |
| ACD57560 | 7.079122064 | 7.342972461 | 7.157842066 | rare lipoprotein A                                                         |
| ACD57562 | 7.390263556 | 7.29469426  | 9.026484712 | penicillin-binding protein 6                                               |
| ACD57563 | 6.35901507  | 6.133832691 | 5.519167596 | conserved hypothetical protein                                             |
| ACD57564 | 10.04115261 | 10.06435207 | 13.02521917 | putative secreted protein                                                  |
| ACD57565 | 8.711281515 | 8.559667704 | 8.327404437 | lipoyltransferase                                                          |
| ACD57566 | 10.74523733 | 10.72799701 | 11.50351769 | lipoinic acid synthetase                                                   |
| ACD57567 | 9.861904202 | 9.958696253 | 10.64500087 | tail-specific protease                                                     |
| ACD57569 | 8.761604418 | 9.180898738 | 7.378953728 | bifunctional NMN adenylyltransferase/Nudix hydrolase                       |
| ACD57570 | 7.223219802 | 6.841646111 | 6.242987326 | nicotinamide phosphoribosyltransferase                                     |
| ACD57571 | 8.396750328 | 7.864718543 | 7.99287604  | conserved hypothetical protein                                             |
| ACD57572 | 6.846204949 | 6.933253945 | 5.636354906 | conserved hypothetical protein                                             |
| ACD57573 | 9.134546968 | 0           | 8.729233254 | conserved hypothetical protein                                             |
| ACD57574 | 6.409165179 | 6.872434796 | 6.804131021 | conserved hypothetical protein                                             |
| ACD57575 | 6.530184697 | 6.985910229 | 7.889467458 | conserved hypothetical protein                                             |
| ACD57576 | 7.370347396 | 8.038869619 | 8.971557923 | rickettsia 17 kDa surface antigen family                                   |
| ACD57577 | 6.128336711 | 5.91375589  | 5.982503089 | conserved hypothetical protein                                             |
| ACD57578 | 7.481064782 | 7.927007529 | 7.922239482 | 6-phosphogluconate dehydrogenase (decarboxylating)                         |
| ACD57580 | 13.00399393 | 13.93871584 | 13.54825599 | putative phospholipid-binding domain family                                |
| ACD57581 | 7.542838417 | 7.952100554 | 7.520972191 | two-component system sensor protein                                        |
| ACD57582 | 7.684706549 | 7.988962975 | 7.327103486 | two-component system regulatory protein                                    |
| ACD57583 | 7.131805527 | 7.183198661 | 6.5700105   | histidine kinase-response regulator hybrid protein                         |
| ACD57584 | 8.075436363 | 8.268420357 | 7.217579713 | 2-amino-4-hydroxy-6-hydroxymethylidihydropteridine pyrophosphokinase       |
| ACD57586 | 6.95919055  | 6.818888897 | 6.811304042 | conserved hypothetical protein                                             |
| ACD57588 | 4.271410735 | 5.011916006 | 5.29408768  | ISXoo13 transposase                                                        |
| ACD57590 | 0           | 0           | 6.662034554 | transposase                                                                |
| ACD57592 | 6.661421833 | 6.097391679 | 6.062525427 | TonB-dependent receptor                                                    |
| ACD57593 | 8.195736373 | 8.829411967 | 8.762441838 | hypothetical protein                                                       |
| AGS47849 | 6.615738502 | 6.567251853 | 5.932840719 | truncated beta-galactosidase                                               |
| ACD57594 | 7.455047697 | 7.543070498 | 7.007711298 | membrane protein, putative                                                 |
| ACD57595 | 7.649701673 | 8.105452849 | 8.760357357 | transcriptional regulator GntR family                                      |
| ACD57597 | 8.141110871 | 8.069868619 | 7.8987223   | glucose-galactose transporter                                              |
| ACD57598 | 7.775228365 | 7.308948747 | 7.731895994 | transcriptional regulator Lacl family                                      |
| ACD57599 | 6.939026712 | 6.773442553 | 6.450600929 | glucosamine-fructose-6-phosphate aminotransferase                          |
| ACD57600 | 6.925109324 | 7.186510462 | 6.274056613 | N-acetylglucosamine-6-phosphate deacetylase                                |
| ACD57605 | 9.080271252 | 10.17806723 | 8.247486095 | hypothetical protein                                                       |
| ACD57607 | 0           | 0           | 0           | ISXo8 transposase                                                          |
| ACD57614 | 0           | 2.210292224 | 3.137047691 | ISXo3 transposase ORF B                                                    |
| ACD57621 | 0           | 0           | 0           | ISXoo3 transposase ORF A                                                   |
| ACD57622 | 0           | 1.930029534 | 0           | ISXoo3 transposase ORF B                                                   |
| ACD57629 | 6.040511109 | 7.090747595 | 6.218172814 | GTP-binding protein                                                        |
| ACD57632 | 7.413120146 | 7.497644297 | 7.226874552 | glutamate--cysteine ligase                                                 |
| ACD57633 | 10.18116468 | 10.09693912 | 7.779325391 | hypothetical protein                                                       |
| ACD57636 | 7.296714353 | 6.529639818 | 6.839266787 | glutamate--cysteine ligase                                                 |
| ACD57638 | 8.515869325 | 8.936852855 | 6.085278051 | conserved hypothetical protein                                             |
| ACD57641 | 7.926853393 | 8.382204665 | 7.69407228  | glycosyl transferase, group 1 family protein                               |
| ACD57642 | 0           | 0           | 0           | conserved hypothetical protein                                             |
| ACD57644 | 10.82442578 | 9.806430399 | 10.39921383 | conserved hypothetical protein                                             |
| ACD57645 | 6.929506975 | 6.784739527 | 6.28484908  | S-(hydroxymethyl)glutathione dehydrogenase/class III alcohol dehydrogenase |

|          |             |             |             |                                                                                              |
|----------|-------------|-------------|-------------|----------------------------------------------------------------------------------------------|
| ACD57647 | 8.07204147  | 8.270659751 | 6.935624753 | glutathione-dependent formaldehyde-activating enzyme (S-(hydroxymethyl)glutathione synthase) |
| ACD57649 | 6.440131648 | 6.672411198 | 5.567372036 | S-formylglutathione hydrolase                                                                |
| ACD57650 | 9.827447508 | 9.99703831  | 8.623534031 | conserved hypothetical protein                                                               |
| ACD57651 | 8.483122472 | 8.188123944 | 7.893968869 | lipoprotein, putative                                                                        |
| ACD57654 | 6.144754079 | 6.639224927 | 6.994557097 | conserved hypothetical protein                                                               |
| ACD57656 | 7.536643538 | 7.37340461  | 7.455713531 | TonB-dependent outer membrane Receptor                                                       |
| ACD57657 | 8.666408656 | 8.835564113 | 8.367720513 | serine hydroxymethyltransferase                                                              |
| ACD57658 | 8.820498107 | 9.217565173 | 8.768329911 | conserved hypothetical protein                                                               |
| ACD57659 | 6.997439199 | 7.505970301 | 6.011533656 | ATP cone domain protein                                                                      |
| ACD57660 | 7.896683573 | 7.668424099 | 6.427366486 | acetyltransferase                                                                            |
| ACD57661 | 7.283329168 | 7.564637294 | 6.271138035 | riboflavin biosynthesis protein RibD                                                         |
| ACD57663 | 7.95214716  | 7.760001331 | 6.369454269 | riboflavin synthase, alpha subunit                                                           |
| ACD57664 | 7.069852511 | 7.281095456 | 6.449617497 | riboflavin biosynthesis protein ribAB                                                        |
| ACD57665 | 7.033070544 | 7.954836074 | 6.594653046 | 6,7-dimethyl-8-ribityllumazine synthase                                                      |
| ACD57666 | 7.142597235 | 7.169273638 | 6.647760605 | transcription antitermination factor NusB                                                    |
| ACD57667 | 6.488277197 | 6.86757528  | 5.936783968 | thiamine-monophosphate kinase                                                                |
| ACD57668 | 11.15902615 | 10.72993508 | 10.47418251 | hypothetical protein                                                                         |
| ACD57669 | 5.668127636 | 6.219559641 | 5.7106687   | hydrolase CocE/NonD family protein subfamily                                                 |
| ACD57670 | 6.423228547 | 5.855267173 | 6.024264265 | conserved hypothetical protein                                                               |
| ACD57671 | 8.327247232 | 8.798040791 | 8.285046125 | conserved hypothetical protein                                                               |
| ACD57673 | 6.584959495 | 6.314660277 | 6.203073877 | conserved hypothetical protein                                                               |
| ACD57674 | 9.141854244 | 8.533933163 | 11.29526959 | conserved hypothetical protein                                                               |
| ACD57675 | 6.764990981 | 6.646825085 | 7.60889793  | K+-transporting ATPase, A subunit                                                            |
| ACD57676 | 7.028646501 | 6.71596199  | 7.709400929 | K+-transporting ATPase, B subunit                                                            |
| ACD57677 | 7.149818237 | 7.354125938 | 8.289534795 | K+-transporting ATPase, C subunit                                                            |
| ACD57678 | 6.648594866 | 6.780021321 | 6.205216545 | sensor protein KdpD                                                                          |
| ACD57679 | 7.161565256 | 7.256897432 | 7.179083035 | two-component system regulatory protein                                                      |
| ACD57684 | 6.453102687 | 6.746823317 | 6.269753192 | conserved hypothetical protein                                                               |
| ACD57686 | 8.308225248 | 8.631227995 | 8.029657172 | MraZ protein                                                                                 |
| ACD57687 | 7.197216693 | 7.241172821 | 6.320798744 | S-adenosyl-methyltransferase MraW                                                            |
| ACD57688 | 9.050575158 | 9.151734536 | 7.411663512 | cell division protein FtsL                                                                   |
| ACD57689 | 6.916464702 | 7.017688119 | 6.172109431 | peptidoglycan synthetase FtsI                                                                |
| ACD57690 | 7.034732946 | 7.296044363 | 6.116187986 | UDP-N-acetylmuramoylalanyl-D-glutamate--2, 6-diaminopimelate ligase                          |
| ACD57691 | 7.542366403 | 7.761198826 | 6.55810229  | UDP-N-acetylmuramoyl-tripeptide--D-alanyl-D-alanine ligase                                   |
| ACD57692 | 7.163377966 | 7.39752918  | 6.324445204 | phospho-N-acetylmuramoyl-pentapeptide-transferase                                            |
| ACD57693 | 7.799203898 | 7.365368846 | 6.673344414 | cell division protein FtsW                                                                   |
| ACD57694 | 6.881334249 | 6.71929298  | 5.800177725 | undecaprenyldiphospho-muramoylpentapeptide beta-N-acetylglucosaminyltransferase              |
| ACD57695 | 7.747138962 | 7.698760221 | 6.411616062 | UDP-N-acetylmuramate--alanine ligase                                                         |
| ACD57696 | 7.250630034 | 6.779693094 | 6.020119897 | D-alanine--D-alanine ligase                                                                  |
| ACD57697 | 7.215426219 | 7.38451612  | 6.282999427 | cell division protein FtsQ                                                                   |
| ACD57698 | 7.442653269 | 6.698246265 | 5.520019872 | cell division protein FtsA                                                                   |
| ACD57699 | 8.230659356 | 8.314120964 | 7.178684767 | cell division protein FtsZ                                                                   |
| ACD57700 | 8.706344057 | 9.272944648 | 9.102755224 | UDP-3-0-acyl N-acetylglucosamine deacetylase                                                 |
| ACD57702 | 7.554980168 | 8.008837561 | 6.661550098 | peptidase                                                                                    |
| ACD57703 | 8.041894563 | 7.969144733 | 7.582608688 | preprotein translocase, SecA subunit                                                         |
| ACD57704 | 7.670826176 | 8.077189581 | 7.24055285  | glyoxalase family protein                                                                    |
| ACD57705 | 7.120497098 | 6.724745757 | 6.075166777 | dgtp-pyrophosphohydrolase x3b thiamine phosphate synthase                                    |
| ACD57706 | 9.352105238 | 9.94220658  | 9.8769144   | hypothetical protein                                                                         |
| ACD57710 | 7.724200041 | 7.418898301 | 6.929495139 | quinone reductase                                                                            |
| ACD57711 | 6.327940604 | 6.188044796 | 6.466297566 | protease                                                                                     |
| ACD57713 | 0           | 0           | 8.425912426 | hypothetical protein                                                                         |
| ACD57715 | 7.633794454 | 7.067929068 | 7.659753342 | galactose 1-dehydrogenase                                                                    |
| ACD57717 | 7.407684152 | 7.339618441 | 6.388360046 | conserved hypothetical protein                                                               |
| ACD57718 | 7.016451748 | 6.912733684 | 7.413196325 | conserved hypothetical protein                                                               |
| ACD57719 | 7.59912435  | 7.378190796 | 7.117321024 | conserved hypothetical protein                                                               |
| ACD57721 | 7.41153641  | 8.224879569 | 6.047001728 | sulfotransferase                                                                             |
| ACD57722 | 7.081403545 | 7.129715761 | 6.325841503 | methyltransferase                                                                            |
| ACD57724 | 7.866512394 | 7.261831659 | 8.202481392 | hypothetical protein                                                                         |
| ACD57725 | 7.364677479 | 7.096219678 | 7.636233082 | phosphoenolpyruvate carboxylase                                                              |
| ACD57726 | 7.930122287 | 7.552138795 | 8.029552272 | transcriptional regulator TetR/acrR family                                                   |
| ACD57730 | 6.787719763 | 6.10576397  | 8.137057736 | TonB-dependent receptor                                                                      |
| ACD57731 | 6.585109768 | 6.617069223 | 7.697252561 | phosphoanhydride phosphohydrolase                                                            |

|          |             |             |              |                                                                                                                        |
|----------|-------------|-------------|--------------|------------------------------------------------------------------------------------------------------------------------|
| ACD57733 | 7.671894842 | 8.170250573 | 7.850349386  | integral membrane protein                                                                                              |
| ACD57734 | 6.937885772 | 7.374083112 | 6.532667615  | conserved hypothetical protein                                                                                         |
| ACD57737 | 0           | 0           | 7.647976408  | hypothetical protein                                                                                                   |
| ACD57741 | 10.18837867 | 9.552574964 | 10.80207202  | hypothetical protein                                                                                                   |
| ACD57745 | 6.643186624 | 6.641717975 | 6.742855081  | voltage-gated potassium channel beta subunit                                                                           |
| ACD57746 | 8.255123015 | 9.300180937 | 6.89858325   | conserved hypothetical protein                                                                                         |
| ACD57747 | 7.741015231 | 8.394282614 | 6.999075477  | conserved hypothetical protein                                                                                         |
| ACD57754 | 8.303917706 | 8.417228056 | 8.646623508  | acyl-CoA thioesterase I                                                                                                |
| ACD57755 | 8.670755376 | 9.553368184 | 10.09624077  | two-component system regulatory protein                                                                                |
| ACD57756 | 6.814076112 | 7.33596196  | 6.469395989  | two-component system sensor protein                                                                                    |
| ACD57760 | 7.130961749 | 7.577088886 | 7.087685593  | diacylglycerol kinase                                                                                                  |
| ACD57761 | 7.873542545 | 8.129030523 | 7.750479218  | LemA family protein                                                                                                    |
| ACD57762 | 6.891565004 | 7.171517098 | 6.267093783  | glycine rich protein                                                                                                   |
| ACD57763 | 6.192227707 | 7.054620597 | 6.297321664  | conserved hypothetical protein                                                                                         |
| ACD57764 | 7.367633159 | 7.351672494 | 6.974047416  | prolipoprotein diacylglyceryl transferase                                                                              |
| ACD57765 | 7.355139632 | 7.411316073 | 7.565627638  | thymidylate synthase                                                                                                   |
| ACD57766 | 11.19652221 | 11.75965104 | 11.43813688  | hypothetical protein                                                                                                   |
| ACD57767 | 7.555141267 | 7.582232324 | 7.607004746  | dihydrofolate reductase                                                                                                |
| ACD57777 | 6.772901761 | 7.098284796 | 7.932143871  | 2-polyprenyl-6-methoxyphenol 4-hydroxylase                                                                             |
| ACD57778 | 7.24830712  | 7.847414451 | 7.539856721  | VisC                                                                                                                   |
| ACD57779 | 7.098726937 | 6.088684372 | 12.37142273  | transposase                                                                                                            |
| ACD57780 | 3.283874373 | 0.568207261 | 1.146870242  | ISXo5 transposase                                                                                                      |
| ACD57781 | 5.071299313 | 5.476874168 | 7.101692092  | transposase                                                                                                            |
| ACD57783 | 7.537327133 | 7.40933153  | 7.87635732   | protocatechuate 3,4-dioxygenase beta chain                                                                             |
| ACD57784 | 7.886257482 | 9.601297239 | 8.147851067  | conserved domain protein                                                                                               |
| ACD57785 | 7.180287126 | 7.852104987 | 8.642524689  | transcriptional regulator                                                                                              |
| ACD57793 | 6.830077816 | 7.556621006 | 6.711605032  | glucose-fructose oxidoreductase                                                                                        |
| ACD57799 | 10.85457234 | 10.64591957 | 11.19479378  | transposase                                                                                                            |
| ACD57801 | 0           | 4.607762318 | 2.087520548  | ISXoo11 transposase                                                                                                    |
| ACD57802 | 8.431898703 | 8.377926277 | 8.546524095  | transposase, IS30 family                                                                                               |
| ACD57805 | 9.06207043  | 10.29556233 | 8.709073471  | cellulose biosynthesis protein                                                                                         |
| ACD57806 | 6.944097083 | 7.089360434 | 6.673443356  | glutathione S-transferase                                                                                              |
| ACD57807 | 7.897319094 | 7.052883181 | 7.106316909  | conserved hypothetical protein                                                                                         |
| ACD57815 | 6.853496704 | 6.543732498 | 6.298616163  | conserved hypothetical protein                                                                                         |
| ACD57816 | 7.348382928 | 7.80133329  | 8.07936211   | methionine-S-sulfoxide reductase                                                                                       |
| ACD57826 | 7.409161784 | 7.575448485 | 7.337666498  | protein methyltransferase HemK (Protein-glutamine N-methyltransferase hemK) (Protein-(glutamine-N5) MTase hemK)        |
| ACD57827 | 7.230990715 | 6.67067041  | 6.81905501   | conserved hypothetical protein                                                                                         |
| ACD57828 | 7.925352671 | 7.461020986 | 7.26358846   | 2-succinyl-6-hydroxy-2, 4-cyclohexadiene-1-carboxylate synthase, putative                                              |
| ACD57829 | 7.015771849 | 5.922395301 | 6.279432293  | hypothetical protein                                                                                                   |
| ACD57830 | 7.764447011 | 7.999932372 | 7.259338405  | proline iminopeptidase                                                                                                 |
| ACD57835 | 7.08329848  | 7.427103287 | 6.431907058  | conserved hypothetical protein                                                                                         |
| ACD57836 | 6.83406647  | 7.037019745 | 5.863688236  | pyridine nucleotide transhydrogenase                                                                                   |
| ACD57837 | 10.77959625 | 11.20584211 | 10.24989564  | hypothetical protein                                                                                                   |
| ACD57841 | 8.480757894 | 9.073338255 | 8.698228898  | pyridine nucleotide transhydrogenase subunit alpha                                                                     |
| ACD57842 | 7.26923891  | 7.221471121 | 6.988412026  | pyridine nucleotide transhydrogenase subunit beta                                                                      |
| ACD57845 | 8.162305721 | 8.495679175 | 8.809263298  | domain of unknown function protein                                                                                     |
| ACD57846 | 8.10142947  | 8.568860565 | 8.402590022  | branched-chain amino acid aminotransferase                                                                             |
| ACD57847 | 0           | 0           | 0            | extracellular protease                                                                                                 |
| ACD57848 | 0           | 0           | 0            | hypothetical protein                                                                                                   |
| ACD57849 | 1.706349306 | 2.283898073 | -1.422129881 | extracellular protease                                                                                                 |
| ACD57852 | 6.843506551 | 6.619663905 | 10.08881473  | xylanase                                                                                                               |
| ACD57855 | 7.574086366 | 7.492526197 | 6.729321638  | tRNA-processing ribonuclease BN                                                                                        |
| ACD57856 | 6.386126331 | 6.788372501 | 6.866932699  | thioredoxin                                                                                                            |
| ACD57857 | 7.964675869 | 8.49882129  | 7.611039556  | acylphosphatase                                                                                                        |
| ACD57858 | 7.024563477 | 8.265418142 | 9.064869382  | conserved hypothetical protein                                                                                         |
| ACD57864 | 7.21451341  | 7.584714516 | 7.907395451  | tetratricopeptide repeat family                                                                                        |
| ACD57865 | 6.324900589 | 7.005613322 | 5.988243859  | outer membrane lipoprotein LoIB                                                                                        |
| ACD57866 | 8.860441427 | 9.301516772 | 8.4995629    | 4-diphosphocytidyl-2C-methyl-D-erythritol kinase                                                                       |
| PXO_rna3 | 0           | 0           | 0            | XO_rna3 cdna:pseudogene<br>chromosome:GCA_000019585.1:Chromosome:1232205:1232281:1<br>gene:PXO_rna3 transcript:PXO_rna |
| ACD57867 | 7.669040943 | 7.975779198 | 7.942725616  | ribose-phosphate pyrophosphokinase                                                                                     |
| ACD57868 | 8.925450592 | 8.722640203 | 9.360138179  | 50S ribosomal protein L25                                                                                              |
| ACD57869 | 6.551565235 | 6.691045553 | 6.177299931  | peptidyl-tRNA hydrolase                                                                                                |

|          |              |             |             |                                                                                                                                 |
|----------|--------------|-------------|-------------|---------------------------------------------------------------------------------------------------------------------------------|
| ACD57870 | 7.191227046  | 7.045311906 | 7.003028732 | GTP-binding protein YchF                                                                                                        |
| PXO_rna4 | 0            | 0           | 0           | XO_rna4 cdna:pseudogene<br>chromosome:GCA_000019585.1:Chromosome:1236069:1236154:1<br>gene:PXO_rna4 transcript:PXO_rna          |
| PXO_rna5 | 0            | 0           | 0           | XO_rna5 cdna:pseudogene<br>chromosome:GCA_000019585.1:Chromosome:1236184:1236257:1<br>gene:PXO_rna5 transcript:PXO_rna          |
| PXO_rna6 | 0            | 0           | 0           | XO_rna6 cdna:pseudogene<br>chromosome:GCA_000019585.1:Chromosome:1236292:1236367:1<br>gene:PXO_rna6 transcript:PXO_rna          |
| PXO_rna7 | 0            | 0           | 0           | XO_rna7 cdna:pseudogene<br>chromosome:GCA_000019585.1:Chromosome:1237710:1237785:1<br>gene:PXO_rna7 transcript:PXO_rna          |
| ACD57872 | 9.470762574  | 9.635792475 | 9.561062596 | preprotein translocase subunit SecE                                                                                             |
| ACD57873 | 8.949835463  | 9.045857931 | 8.780615222 | transcription termination/antitermination factor NusG                                                                           |
| ACD57874 | 10.516660617 | 10.72900887 | 11.472635   | ribosomal protein L11                                                                                                           |
| ACD57875 | 9.259274841  | 9.411208011 | 10.0725078  | ribosomal protein L1                                                                                                            |
| ACD57876 | 8.966834185  | 9.206631015 | 9.894369125 | ribosomal protein L10, putative                                                                                                 |
| ACD57877 | 9.193503184  | 9.776000324 | 10.11800665 | ribosomal protein L7/L12                                                                                                        |
| ACD57878 | 9.015080476  | 8.912434307 | 9.229402864 | DNA-directed RNA polymerase, beta subunit                                                                                       |
| ACD57879 | 8.767843464  | 8.660808851 | 8.138471485 | DNA-directed RNA polymerase, beta' subunit                                                                                      |
| ACD57880 | 11.84155649  | 12.29105843 | 13.16950071 | ribosomal protein S12                                                                                                           |
| ACD57881 | 10.21939846  | 10.51747255 | 11.28842778 | ribosomal protein S7                                                                                                            |
| ACD57882 | 9.185829388  | 9.259856227 | 10.04201499 | translation elongation factor G                                                                                                 |
| ACD57885 | 9.09255367   | 0           | 6.656424863 | putative phenylacetaldehyde dehydrogenase                                                                                       |
| ACD57886 | 11.38225655  | 11.7088511  | 11.58752908 | ribosomal protein S10                                                                                                           |
| ACD57887 | 9.695558907  | 9.988088174 | 9.973453429 | ribosomal protein L3                                                                                                            |
| ACD57888 | 9.781412174  | 10.0423297  | 9.835380941 | ribosomal protein L4/L1 family                                                                                                  |
| ACD57889 | 11.50253349  | 11.52668018 | 11.74692994 | ribosomal protein L23                                                                                                           |
| ACD57890 | 9.198445041  | 9.111091319 | 9.005978163 | ribosomal protein L2                                                                                                            |
| ACD57891 | 10.70866146  | 10.75941386 | 10.3719073  | ribosomal protein S19                                                                                                           |
| ACD57892 | 10.82603201  | 10.99894295 | 10.064635   | ribosomal protein L22                                                                                                           |
| ACD57893 | 8.893987065  | 8.634952591 | 8.375469568 | ribosomal protein S3                                                                                                            |
| ACD57894 | 9.630407292  | 9.047107549 | 9.282136277 | ribosomal protein L16                                                                                                           |
| ACD57895 | 11.31498535  | 11.29420143 | 10.61942218 | ribosomal protein L29                                                                                                           |
| ACD57896 | 10.05417016  | 10.03754695 | 9.091369267 | ribosomal protein S17                                                                                                           |
| ACD57897 | 9.810635896  | 9.670965997 | 9.295330435 | ribosomal protein L14                                                                                                           |
| ACD57898 | 10.07666865  | 10.28118821 | 9.600464902 | ribosomal protein L24                                                                                                           |
| ACD57899 | 10.6091695   | 10.46821673 | 10.83608192 | 50S ribosomal protein L5                                                                                                        |
| ACD57900 | 10.43910364  | 10.34743313 | 10.14960742 | 30S ribosomal protein S14                                                                                                       |
| ACD57901 | 11.78033881  | 12.06867753 | 12.05246616 | ribosomal protein S8                                                                                                            |
| ACD57902 | 10.04555491  | 9.918702266 | 10.3488056  | 50S ribosomal protein L6                                                                                                        |
| ACD57903 | 10.98710765  | 11.20584822 | 11.31017536 | ribosomal protein L18                                                                                                           |
| ACD57904 | 10.1411492   | 10.20336024 | 10.48007322 | ribosomal protein S5                                                                                                            |
| ACD57905 | 11.74662348  | 11.91601752 | 12.47785943 | ribosomal protein L30                                                                                                           |
| ACD57906 | 10.70155772  | 10.27792665 | 11.62439795 | ribosomal protein L15                                                                                                           |
| ACD57907 | 8.534139439  | 8.996145791 | 7.753785022 | preprotein translocase, SecY subunit                                                                                            |
| ACD57908 | 11.35873361  | 11.49858996 | 12.05274804 | ribosomal protein S13p/S18e                                                                                                     |
| ACD57909 | 11.10177218  | 10.95152514 | 11.54495478 | ribosomal protein S11                                                                                                           |
| ACD57910 | 9.463395628  | 9.513737464 | 9.816506911 | ribosomal protein S4                                                                                                            |
| ACD57911 | 9.404707313  | 9.406224142 | 8.837240009 | DNA-directed RNA polymerase, alpha subunit                                                                                      |
| ACD57912 | 9.737440028  | 9.875720175 | 9.76376676  | ribosomal protein L17                                                                                                           |
| ACD57916 | 0            | 0           | 0           | transposase, IS30 family                                                                                                        |
| ACD57917 | 5.787798107  | 6.286175148 | 5.088773401 | transposase                                                                                                                     |
| ACD57919 | 7.643935536  | 7.165640655 | 7.357639971 | transposase                                                                                                                     |
| ACD57928 | 7.068079597  | 7.658597102 | 7.37086174  | putative sulfotransferase required for AvrXa21 activity ST (raxST)                                                              |
| ACD57929 | 7.349869467  | 7.285993972 | 7.503666755 | putative membrane fusion protein/putative ABC transporter protein required for AvrXa21 activity A (raxA)                        |
| ACD57930 | 7.210603164  | 7.010410616 | 6.87601345  | colicin V secretion/processing ATP-binding protein CvaB/putative ABC transporter protein required for AvrXa21 activity B (raxB) |
| ACD57931 | 7.406102939  | 6.861856138 | 6.124818188 | conserved hypothetical protein                                                                                                  |
| ACD57936 | 7.162300685  | 7.526788727 | 7.058381441 | two-component system regulatory protein (response regulator) required for AvrXa21 activity R (raxR)                             |
| ACD57937 | 6.961044467  | 6.146510636 | 6.304144115 | two-component system (histidine kinase) sensor protein required for AvrXa21 activity H (raxH)                                   |
| ACD57945 | 7.229049503  | 7.14291372  | 6.06233114  | two-component system sensor protein                                                                                             |
| ACD57946 | 7.590661896  | 7.707276296 | 7.334729154 | two-component system regulatory protein                                                                                         |
| ACD57947 | 9.096891693  | 9.699813605 | 9.26604158  | conserved hypothetical protein                                                                                                  |

|          |             |             |             |                                                           |
|----------|-------------|-------------|-------------|-----------------------------------------------------------|
| ACD57948 | 8.143102556 | 8.453406459 | 7.782755829 | conserved hypothetical protein                            |
| ACD57949 | 7.439373802 | 7.596808454 | 7.185995352 | DNA-3-methyladenine glycosylase                           |
| ACD57954 | 6.785445929 | 6.483270835 | 6.530613899 | phosphoribosylglycinamide formyltransferase 2             |
| ACD57956 | 0           | 0           | 0           | conserved hypothetical protein                            |
| ACD57958 | 8.209195022 | 8.201599558 | 8.41444001  | D-alanyl-D-alanine carboxypeptidase family                |
| ACD57959 | 10.48797063 | 10.80597759 | 10.1489341  | paar motif family                                         |
| ACD57960 | 7.789272795 | 8.015877756 | 7.609422553 | putative membrane protein                                 |
| ACD57961 | 6.991499171 | 6.915903274 | 6.908308549 | ImcF-related family                                       |
| ACD57962 | 7.490874938 | 6.982001024 | 6.266531705 | conserved hypothetical protein                            |
| ACD57963 | 7.03440282  | 7.21292919  | 6.689257221 | OmpA family domain protein                                |
| ACD57965 | 6.641258444 | 6.550769868 | 6.472146553 | Rhs element Vgr protein                                   |
| ACD57966 | 6.195550365 | 6.203445892 | 6.48309183  | ATPase involved in DNA repair                             |
| ACD57968 | 0           | 0           | 0           | ATPase involved in DNA repair                             |
| ACD57970 | 0           | 0           | 0           | ATPase involved in DNA repair                             |
| ACD57973 | 4.798403107 | 4.046814068 | 3.600697931 | ATPase involved in DNA repair                             |
| ACD57975 | 0           | 0           | 0           | ATPase involved in DNA repair                             |
| ACD57977 | 6.431537719 | 7.118401258 | 6.58772502  | Rhs element Vgr protein                                   |
| ACD57978 | 6.256487999 | 6.175434779 | 7.032508638 | Rhs element Vgr protein                                   |
| ACD57979 | 8.009739058 | 8.09502773  | 7.707731838 | conserved hypothetical protein                            |
| ACD57980 | 10.58864906 | 8.437281846 | 12.1343108  | conserved hypothetical protein                            |
| ACD57982 | 0           | 0           | 0.610558337 | ISXo8 transposase                                         |
| ACD57984 | 10.10670688 | 9.602899251 | 10.104887   | conserved hypothetical protein                            |
| ACD57985 | 13.44576498 | 12.80689596 | 13.0926531  | conserved hypothetical protein                            |
| ACD57991 | 8.193421867 | 7.656017204 | 8.270080366 | conserved hypothetical protein                            |
| ACD57992 | 7.2235577   | 7.389971136 | 6.742248796 | conserved hypothetical protein                            |
| ACD57997 | 7.310794527 | 7.869439619 | 8.997834333 | 2,3-bisphosphoglycerate-dependent phosphoglycerate mutase |
| ACD57998 | 9.44119711  | 9.860432115 | 8.630882301 | hypothetical protein                                      |
| ACD57999 | 8.460033982 | 8.937750446 | 7.274634403 | conserved hypothetical protein                            |
| ACD58000 | 8.409798228 | 6.541346015 | 7.46135666  | hypothetical protein                                      |
| ACD58001 | 6.560747048 | 6.170051232 | 6.128643968 | metallopeptidase                                          |
| ACD58002 | 6.74262607  | 6.260187536 | 5.720240153 | cardiolipin synthase                                      |
| ACD58008 | 10.11665586 | 10.9388812  | 9.662134275 | hypothetical protein                                      |
| ACD58014 | 7.070657661 | 7.191473822 | 6.712760839 | sensor protein CreC                                       |
| ACD58015 | 3.44343426  | 3.689120211 | 4.00267552  | ISXoo2 transposase                                        |
| ACD58019 | 0           | 0           | 0           | conserved hypothetical protein                            |
| ACD58020 | 5.953016076 | 6.02446153  | 5.668842447 | ISXoo6 transposase                                        |
| ACD58021 | 0           | 0           | 0           | DNA (cytosine-5)-methyltransferase PlmMCI                 |
| ACD58023 | 0           | 0           | 0           | conserved hypothetical protein                            |
| ACD58024 | 0           | 0           | 0           | transposase TnpA, ISL3 family                             |
| ACD58027 | 8.801785947 | 7.410951597 | 6.154844432 | transposase                                               |
| ACD58028 | 6.146926028 | 5.474984332 | 5.125667631 | ISXoo6 transposase                                        |
| ACD58030 | 7.532823435 | 7.119843772 | 6.249684253 | conserved hypothetical protein                            |
| ACD58031 | 6.634384167 | 6.504712544 | 5.984869569 | carbon-nitrogen hydrolase family protein                  |
| ACD58032 | 6.946847805 | 7.064106815 | 7.030104293 | glutamyl-tRNA synthetase                                  |
| ACD58033 | 7.472617738 | 7.750693589 | 6.810507371 | transcriptional regulator, Fur family                     |
| ACD58034 | 6.866969778 | 5.922480935 | 5.817546516 | cupin domain                                              |
| ACD58035 | 6.674587763 | 9.129878006 | 9.291467728 | conserved hypothetical protein                            |
| ACD58036 | 9.609356062 | 7.99859043  | 9.605336908 | transposase                                               |
| ACD58038 | 8.975363645 | 8.126818026 | 10.20105794 | hypothetical protein                                      |
| ACD58041 | 13.50882229 | 14.90847706 | 12.67204296 | conserved domain protein                                  |
| ACD58044 | 6.562677457 | 6.866376387 | 6.72374967  | molybdopterin biosynthesis protein                        |
| ACD58047 | 9.797170278 | 10.84323015 | 12.99463983 | outer membrane protein                                    |
| ACD58048 | 9.540815795 | 10.42642202 | 10.78830235 | hypothetical protein                                      |
| ACD58049 | 6.864161377 | 6.70887696  | 6.745640714 | acyl-CoA dehydrogenase 1                                  |
| ACD58050 | 8.117923562 | 8.262790179 | 7.86333142  | conserved hypothetical protein                            |
| ACD58051 | 6.391853625 | 5.283555127 | 6.173515246 | conserved hypothetical protein                            |
| ACD58052 | 9.989209982 | 9.326024936 | 9.341967962 | hypothetical protein                                      |
| ACD58053 | 10.50834942 | 10.45975947 | 10.30896467 | conserved hypothetical protein                            |
| ACD58054 | 7.308584768 | 7.229587923 | 6.518042512 | conserved hypothetical protein                            |
| ACD58055 | 6.996919716 | 6.33292987  | 6.112727235 | glutathione S-transferase                                 |
| ACD58056 | 6.492135196 | 6.588344359 | 5.813560602 | asparagine synthase (glutamine-hydrolyzing)               |
| ACD58057 | 7.436977989 | 7.317891925 | 7.350470727 | NADPH-dependent fmn reductase                             |
| ACD58058 | 7.180824165 | 7.401374477 | 6.53700868  | replicative DNA helicase                                  |
| ACD58059 | 6.929980315 | 6.950491743 | 6.130065982 | photolyase                                                |

|          |             |             |             |                                                                                                                       |
|----------|-------------|-------------|-------------|-----------------------------------------------------------------------------------------------------------------------|
| ACD58060 | 9.276803708 | 9.599990924 | 8.104284235 | hypothetical protein                                                                                                  |
| ACD58061 | 8.916046638 | 9.418571574 | 10.39330464 | OmpA family protein                                                                                                   |
| ACD58062 | 7.473072529 | 6.966372784 | 6.934693407 | short chain dehydrogenase                                                                                             |
| ACD58063 | 3.739912893 | 2.590499026 | 4.037698491 | IS1112 transposase                                                                                                    |
| ACD58068 | 9.071703685 | 9.173352337 | 9.025795687 | conserved hypothetical protein                                                                                        |
| ACD58069 | 9.475946172 | 9.411720704 | 8.072416693 | conserved hypothetical protein                                                                                        |
| ACD58073 | 10.53694653 | 10.41949676 | 11.48066905 | hypothetical protein                                                                                                  |
| ACD58076 | 6.144515496 | 6.511572404 | 5.438928216 | conserved hypothetical protein                                                                                        |
| ACD58077 | 5.770120736 | 6.453481363 | 7.67308996  | conserved hypothetical protein                                                                                        |
| ACD58078 | 9.196931567 | 9.307660759 | 8.773429365 | conserved hypothetical protein                                                                                        |
| ACD58079 | 6.70149361  | 7.053849877 | 7.781766234 | conserved hypothetical protein                                                                                        |
| ACD58080 | 6.853983176 | 8.425769792 | 7.27351589  | inner membrane protein                                                                                                |
| ACD58086 | 7.243116846 | 7.489021033 | 7.630383628 | ATP-dependent RNA helicase                                                                                            |
| ACD58087 | 6.734655433 | 6.604839331 | 5.995152073 | Putative signal protein with PAS(PAC), GGDEF and EAL domains                                                          |
| ACD58088 | 11.01959073 | 9.757901654 | 8.808385051 | hypothetical protein                                                                                                  |
| ACD58089 | 7.775709036 | 7.570440161 | 8.457323416 | ribosomal large subunit pseudouridine synthase F                                                                      |
| ACD58093 | 10.68582629 | 9.706508105 | 8.523162023 | hypothetical protein                                                                                                  |
| ACD58094 | 6.096291375 | 6.768250502 | 6.572788131 | regulator of ribonuclease activity A                                                                                  |
| ACD58095 | 6.900069786 | 6.378877453 | 6.002495506 | beta-lactamase                                                                                                        |
| ACD58096 | 6.900468352 | 7.16491698  | 6.028193401 | transporter, monovalent cation/x3aproton antiporter-2 (CPA2) family                                                   |
| ACD58099 | 6.903749317 | 6.08805677  | 6.662262477 | outer membrane channel protein                                                                                        |
| ACD58100 | 6.022492101 | 5.694582154 | 5.741059738 | outer membrane protein V                                                                                              |
| ACD58101 | 5.919709529 | 6.123188171 | 6.36151748  | RND efflux membrane fusion protein                                                                                    |
| ACD58102 | 6.720962434 | 6.314977425 | 5.805349213 | acriflavin resistance protein                                                                                         |
| ACD58103 | 6.956788504 | 6.474551234 | 5.970296895 | conserved hypothetical protein                                                                                        |
| ACD58104 | 7.175754121 | 6.958552715 | 6.158819703 | ABC transporter ATP-binding protein                                                                                   |
| ACD58111 | 6.438903273 | 6.592125104 | 6.429185769 | ISXoo6 transposase                                                                                                    |
| ACD58112 | 5.850744426 | 5.640644063 | 5.547890887 | RhsD protein                                                                                                          |
| ACD58114 | 6.547102748 | 5.301390104 | 6.25588024  | ISXo8 transposase                                                                                                     |
| ACD58115 | 0           | 0           | 0           | ISxac1 transposase                                                                                                    |
| ACD58116 | 3.719588697 | 2.147270875 | 2.561990808 | IS1112 transposase                                                                                                    |
| ACD58122 | 11.07736986 | 11.49504053 | 11.08682622 | pilin                                                                                                                 |
| ACD58123 | 7.17178728  | 6.858901042 | 6.057580239 | sulfatase domain protein                                                                                              |
| ACD58124 | 7.589074328 | 7.255850035 | 7.404528507 | spermine/spermidine synthase family protein                                                                           |
| ACD58125 | 7.559552995 | 7.919596322 | 6.906373537 | putative integral membrane protein                                                                                    |
| ACD58126 | 7.159689727 | 7.697662633 | 7.253431513 | type IV-A pilus assembly ATPase PilB                                                                                  |
| ACD58132 | 9.239125907 | 9.161827233 | 9.688862232 | succinyl-CoA synthetase beta chain                                                                                    |
| ACD58133 | 9.113182167 | 8.940748176 | 9.830160233 | chain A, Succinyl-Coa Synthetase (Succinate-Coa Ligase) (Adp-Forming) (E.C.)                                          |
| ACD58134 | 0           | 0           | 0           | hypothetical protein                                                                                                  |
| ACD58135 | 7.014288335 | 6.776169803 | 6.24549186  | hydrolyzing))                                                                                                         |
| ACD58136 | 9.89492384  | 9.450623609 | 8.452710735 | hypothetical protein                                                                                                  |
| ACD58138 | 7.130766169 | 7.024519153 | 7.356742461 | ribosomal large subunit pseudouridine synthase D                                                                      |
| ACD58139 | 6.865065116 | 6.947572654 | 6.318618727 | conserved hypothetical protein                                                                                        |
| ACD58140 | 6.587782016 | 6.938297555 | 6.063207384 | conserved hypothetical protein                                                                                        |
| ACD58141 | 6.960998148 | 6.945139463 | 6.006385553 | protein of unknown function                                                                                           |
| ACD58148 | 7.336569042 | 7.983352778 | 7.076217022 | lipoprotein, putative                                                                                                 |
| ACD58150 | 7.720846182 | 8.133912814 | 6.924171163 | inorganic anion transporter, sulfate permease (SulP) family protein                                                   |
| ACD58151 | 10.28564496 | 10.35777191 | 11.5333346  | conserved domain protein                                                                                              |
| ACD58154 | 8.910789616 | 9.269907441 | 10.81609566 | EF hand domain protein                                                                                                |
| ACD58160 | 8.794370375 | 9.074877344 | 8.403212325 | conserved hypothetical protein                                                                                        |
| ACD58163 | 11.89272494 | 12.65833423 | 13.3068734  | ribosomal protein L21                                                                                                 |
| ACD58164 | 10.72140684 | 11.68952194 | 11.08668029 | ribosomal protein L27                                                                                                 |
| ACD58165 | 7.772914953 | 7.7501442   | 8.142209191 | GTP-binding protein Obg/CgtA                                                                                          |
| ACD58167 | 7.054175583 | 7.189725741 | 6.216722581 | integral membrane protein MviN                                                                                        |
| ACD58168 | 6.643734998 | 7.175494661 | 7.007969128 | riboflavin biosynthesis protein RibF                                                                                  |
| ACD58169 | 6.782644451 | 7.153025016 | 6.224937434 | isoleucyl-tRNA synthetase                                                                                             |
| ACD58170 | 6.620925052 | 6.774510352 | 6.007928775 | signal peptidase II                                                                                                   |
| ACD58171 | 7.114533608 | 7.201859265 | 7.204091796 | 4-hydroxy-3-methylbut-2-enyl diphosphate reductase                                                                    |
| PXO_rna8 | 0           | 0           | 0           | XO_rna8 cDNA:pseudogene<br>chromosome:GCA_000019585.1:Chromosome:1542126:1542201:1<br>gene:PXO_rna8 transcript:PXO_ma |
| ACD58173 | 7.887263271 | 7.891990222 | 10.36738199 | ubiquinol oxidase, subunit II                                                                                         |
| ACD58174 | 8.115797973 | 7.912871377 | 9.56349565  | cytOchrome o ubiquinol oxidase, subunit I                                                                             |
| ACD58175 | 7.816030042 | 7.829545162 | 8.939579214 | cytOchrome o ubiquinol oxidase, subunit III                                                                           |



|          |             |             |             |                                           |
|----------|-------------|-------------|-------------|-------------------------------------------|
| ACD58176 | 8.454332199 | 8.7968216   | 8.783892043 | cytOchrome o ubiquinol oxidase subunit IV |
| ACD58177 | 7.099852731 | 6.940507412 | 7.382355995 | PDZ domain family protein                 |
| ACD58178 | 7.450270993 | 7.828682351 | 6.851711568 | Rhs element Vgr protein, putative         |
| ACD58179 | 6.706046995 | 6.850736926 | 5.533479251 | tetratricopeptide repeat domain protein   |
| ACD58181 | 0           | 0           | 0           | RHS Repeat family                         |
| ACD58182 | 0           | 0           | 0           | hypothetical protein                      |
| ACD58183 | 5.976808108 | 6.478664472 | 4.142290893 | RHS Repeat family                         |
| ACD58185 | 0           | 0           | 0           | transposase                               |
| ACD58187 | 5.80400708  | 5.74819285  | 5.987179864 | RhsD protein                              |
| ACD58189 | 4.194591403 | 3.746871676 | 3.261088461 | RhsD protein                              |
| ACD58190 | 2.175336168 | 0           | 0           | transposase                               |
| ACD58202 | 4.140705047 | 3.818022246 | 4.644600428 | isrso17-ISXo8 transposase protein         |
| ACD58203 | 0           | 0           | 0           | ISXo8 transposase                         |
| ACD58205 | 10.55424348 | 11.22278887 | 5.783941138 | conserved hypothetical protein            |
| ACD58206 | 9.641175699 | 10.22602678 | 5.988305219 | Scil protein                              |
| ACD58207 | 10.1691734  | 10.83929041 | 6.368518684 | conserved hypothetical protein            |
| ACD58208 | 9.006171771 | 9.715306539 | 5.398189591 | ImpE protein                              |
| ACD58209 | 9.000780309 | 9.445010706 | 5.829725272 | conserved hypothetical protein            |
| ACD58210 | 8.130560267 | 8.442719612 | 6.006753564 | SciC protein                              |
| ACD58211 | 7.456921114 | 7.821238252 | 5.752023316 | conserved hypothetical protein            |
| ACD58212 | 7.886653785 | 8.178580204 | 5.507553642 | CipB                                      |
| ACD58213 | 9.930347048 | 10.43295941 | 7.50458067  | transposase                               |
| ACD58214 | 10.49777202 | 11.1399286  | 9.733842388 | hypothetical protein                      |
| ACD58215 | 8.523060062 | 9.167658993 | 5.713503369 | Rhs-family protein                        |
| ACD58216 | 8.078294937 | 8.828939345 | 5.352253578 | conserved hypothetical protein            |
| ACD58217 | 9.186636735 | 9.865747187 | 6.93515326  | FHA domain protein                        |
| ACD58218 | 7.612293516 | 8.080449813 | 5.796618518 | ImpJ                                      |
| ACD58219 | 8.134344172 | 8.621355936 | 6.721181235 | OmpA family membrane protein              |
| ACD58220 | 6.892536745 | 7.27254581  | 6.03088118  | SciS protein                              |
| ACD58221 | 7.348427193 | 7.469381335 | 6.63144774  | conserved hypothetical protein            |
| ACD58222 | 8.717367975 | 9.133419676 | 7.481524991 | phosphoprotein phosphatase                |
| ACD58223 | 7.063686288 | 7.712279365 | 5.96945905  | protein kinase                            |
| ACD58224 | 6.77059122  | 7.473673284 | 7.173896959 | putative membrane protein                 |
| ACD58231 | 7.115719958 | 6.952904287 | 6.011025935 | transposase, Mutator family               |
| ACD58239 | 6.079881537 | 6.388780205 | 6.62072129  | membrane fusion protein                   |
| ACD58240 | 6.597756112 | 6.370997705 | 6.942056993 | RND superfamily protein                   |
| ACD58241 | 3.293504388 | 2.517414286 | 1.895985025 | ISXoo5 transposase                        |
| ACD58242 | 7.659011171 | 7.503722401 | 6.577667495 | cation/multidrug efflux pump              |
| ACD58244 | 9.875148807 | 8.593816865 | 8.313400055 | putative membrane protein                 |
| ACD58261 | 7.092535171 | 6.557607677 | 6.353753777 | NDP-hexose isomerase                      |
| ACD58262 | 6.977325723 | 6.19061091  | 6.351783784 | transferase hexapeptide repeat            |
| ACD58263 | 7.174366467 | 6.411043148 | 6.174712008 | conserved hypothetical protein            |
| ACD58264 | 6.913870753 | 6.866339292 | 5.977131066 | conserved hypothetical protein            |
| ACD58265 | 6.733598385 | 6.697926686 | 6.243865169 | aminotransferase                          |
| ACD58266 | 7.522228415 | 7.043967806 | 6.290229013 | lipopolysaccharide biosynthesis protein   |
| ACD58267 | 6.599006783 | 6.358709215 | 5.635905269 | glycosyl transferase                      |
| ACD58268 | 7.242802549 | 6.861608044 | 6.403744905 | lipoprotein, putative                     |
| ACD58269 | 6.716250157 | 6.405224873 | 6.317117713 | chain length determinant protein          |
| ACD58270 | 6.391322651 | 6.876909797 | 5.88650869  | methyltransferase                         |
| ACD58271 | 6.333758248 | 6.363234167 | 5.338620517 | amidohydrolase family protein             |
| ACD58272 | 6.568738986 | 6.354631993 | 5.793112953 | biotin synthesis protein                  |
| ACD58273 | 6.767813677 | 6.229382193 | 5.884439187 | glycosyltransferase                       |
| ACD58274 | 6.544259716 | 6.257112479 | 5.943128986 | hexosyltransferase                        |
| ACD58277 | 6.178439778 | 5.820288756 | 4.902652471 | conserved hypothetical protein            |
| ACD58278 | 6.262773269 | 6.407910141 | 6.023324114 | ABC transporter ATP-binding protein       |
| ACD58281 | 7.698614387 | 7.905639718 | 7.237066521 | flavin-dependent oxidoreductase           |
| ACD58282 | 7.018912308 | 7.522393213 | 6.192470366 | general stress protein                    |
| ACD58285 | 7.248383029 | 7.079474117 | 6.823545575 | conserved hypothetical protein            |
| ACD58286 | 7.100515171 | 7.247338926 | 7.908374606 | transport protein                         |
| ACD58287 | 7.347532789 | 7.308939649 | 7.366934137 | transmembrane                             |
| ACD58291 | 0           | 0           | 0           | hypothetical protein                      |
| ACD58292 | 10.07582674 | 10.9295839  | 11.82288945 | conserved hypothetical protein            |
| ACD58293 | 7.850124314 | 7.945707185 | 8.462011407 | CTP synthase                              |
| ACD58294 | 6.945830064 | 6.79492267  | 6.889935871 | 3-deoxy-8-phosphooctulonate synthase      |

|          |             |             |             |                                                                                                                        |
|----------|-------------|-------------|-------------|------------------------------------------------------------------------------------------------------------------------|
| ACD58295 | 9.124705511 | 9.398098075 | 8.341950177 | conserved hypothetical protein                                                                                         |
| ACD58296 | 8.271477035 | 8.477252324 | 9.796477706 | phosphopyruvate hydratase                                                                                              |
| ACD58297 | 7.73806523  | 8.831842414 | 8.213021569 | septum formation initiator protein FtsB                                                                                |
| ACD58298 | 7.191503432 | 7.104881761 | 5.900890953 | 2-C-methyl-D-erythritol 4-phosphate cytidyltransferase                                                                 |
| ACD58299 | 6.724254622 | 6.728954469 | 6.26632368  | 2C-methyl-D-erythritol 2,4-cyclodiphosphate synthase                                                                   |
| ACD58300 | 6.610788634 | 7.132772177 | 6.11188891  | tRNA pseudouridine synthase D                                                                                          |
| ACD58302 | 7.364397337 | 7.627854853 | 7.684545261 | 5'/3'-nucleotidase SurE                                                                                                |
| ACD58303 | 6.818927233 | 6.973576838 | 6.397864556 | protein-L-isoaspartate O-methyltransferase                                                                             |
| ACD58304 | 8.096082602 | 8.011143375 | 8.258876916 | lipoprotein                                                                                                            |
| ACD58305 | 7.582766732 | 7.953829773 | 7.916613981 | lipoprotein                                                                                                            |
| ACD58308 | 8.33860269  | 8.728917067 | 8.724176162 | ribosomal RNA large subunit methyltransferase J                                                                        |
| ACD58309 | 8.713431196 | 9.215964894 | 9.805540752 | cell division protease FtsH                                                                                            |
| ACD58310 | 6.89575097  | 7.069132863 | 6.603307359 | dihydropteroate synthase                                                                                               |
| ACD58311 | 6.82671372  | 6.532284227 | 5.865322516 | tRNA delta(2)-isopentenylpyrophosphate transferase                                                                     |
| ACD58312 | 9.927112747 | 9.583359242 | 8.167975044 | RNA chaperone Hfq, putative                                                                                            |
| ACD58313 | 6.904736969 | 7.163367902 | 5.893252985 | GTP-binding protein                                                                                                    |
| ACD58314 | 6.564466581 | 6.768700426 | 6.454029444 | competence/damage-inducible protein CinA domain protein                                                                |
| ACD58316 | 6.970669625 | 6.874046904 | 6.260742684 | 2-polyprenylphenol 6-hydroxylase                                                                                       |
| ACD58317 | 9.155172412 | 9.605966507 | 9.216001284 | LexA repressor                                                                                                         |
| ACD58318 | 8.585691178 | 8.587762517 | 9.40790292  | protein RecA                                                                                                           |
| ACD58319 | 8.299166798 | 8.16899296  | 8.661664103 | regulatory protein RecX                                                                                                |
| ACD58320 | 7.716428518 | 7.906794413 | 8.084351329 | alanyl-tRNA synthetase                                                                                                 |
| ACD58321 | 12.84065206 | 13.7210244  | 13.12167111 | carbon storage regulator                                                                                               |
| PXO_rna9 | 0           | 0           | 0           | XO_rna9 cdna:pseudogene<br>chromosome:GCA_000019585.1:Chromosome:1727365:1727457:1<br>gene:PXO_rna9 transcript:PXO_rna |
| ACD58322 | 9.379406528 | 9.382386259 | 9.633073326 | hypothetical protein                                                                                                   |
| ACD58323 | 7.135750322 | 6.750124097 | 7.022955869 | hypothetical protein                                                                                                   |
| ACD58324 | 8.353790821 | 7.504326421 | 7.818543833 | hypothetical protein                                                                                                   |
| ACD58326 | 8.24455412  | 8.441599671 | 9.789965574 | replicative DNA helicase                                                                                               |
| ACD58327 | 8.757720016 | 9.801936262 | 9.096997078 | isopentenyl transferase                                                                                                |
| ACD58328 | 9.817575295 | 9.056477858 | 8.26006801  | conserved domain protein                                                                                               |
| ACD58330 | 7.520972191 | 7.597315141 | 6.96151915  | endolysin                                                                                                              |
| ACD58331 | 7.368969097 | 8.299730042 | 7.805247306 | hypothetical protein                                                                                                   |
| ACD58333 | 6.280911786 | 6.557826675 | 5.781058028 | transcriptional regulator                                                                                              |
| ACD58334 | 7.841859932 | 7.924699696 | 7.284874984 | DedA family protein                                                                                                    |
| ACD58343 | 7.912895323 | 8.466027504 | 8.349236991 | dihydrodipicolinate synthase                                                                                           |
| ACD58344 | 7.928382168 | 8.322788947 | 8.406366595 | conserved hypothetical protein                                                                                         |
| ACD58346 | 11.31719212 | 9.788403499 | 10.58598593 | hypothetical protein                                                                                                   |
| ACD58351 | 7.016953107 | 7.62811741  | 6.865485842 | galactose-binding protein regulator                                                                                    |
| ACD58353 | 6.704000442 | 5.916287935 | 5.970140411 | alpha-xylosidase                                                                                                       |
| ACD58354 | 8.406579186 | 8.730694294 | 6.972531835 | expressed protein                                                                                                      |
| ACD58355 | 7.956387774 | 7.417253377 | 6.60675312  | conserved hypothetical protein                                                                                         |
| ACD58356 | 7.753878599 | 7.982685615 | 9.817679212 | xylulokinase                                                                                                           |
| ACD58359 | 7.97499958  | 8.816100462 | 8.463700102 | conserved hypothetical protein                                                                                         |
| ACD58360 | 12.52313555 | 12.13260255 | 13.51365358 | hypothetical protein                                                                                                   |
| ACD58368 | 7.571722311 | 7.596555044 | 7.108127138 | ferrous iron transport protein                                                                                         |
| ACD58369 | 7.15383573  | 7.197246186 | 6.573245752 | ferrous iron transport protein B                                                                                       |
| ACD58370 | 6.732540561 | 8.083250605 | 6.325255078 | conserved hypothetical protein                                                                                         |
| ACD58371 | 8.015983655 | 8.631147947 | 8.350050756 | conserved hypothetical protein                                                                                         |
| ACD58372 | 7.045290061 | 7.084319436 | 7.042316017 | conserved hypothetical protein                                                                                         |
| ACD58373 | 7.80931797  | 7.579858968 | 7.713668324 | valine-pyruvate aminotransferase                                                                                       |
| ACD58374 | 6.514753498 | 6.235054947 | 6.397613031 | mosc domain protein                                                                                                    |
| ACD58377 | 7.632348201 | 8.183362447 | 7.784778781 | dihydrodipicolinate reductase                                                                                          |
| ACD58379 | 7.247262961 | 6.957984225 | 7.702962228 | carbamoyl-phosphate synthase, small subunit                                                                            |
| ACD58380 | 7.25370569  | 7.767158191 | 8.359169731 | putative secreted protein                                                                                              |
| ACD58381 | 6.686108285 | 6.70763522  | 6.982377589 | carbamoyl-phosphate synthase, large subunit                                                                            |
| ACD58382 | 7.032762074 | 7.024231015 | 7.488153454 | transcriptional elongation factor                                                                                      |
| ACD58383 | 6.496516677 | 6.235181351 | 5.306440888 | RpfE regulatory protein                                                                                                |
| ACD58384 | 7.299116416 | 7.060609475 | 6.225261432 | single-stranded-DNA-specific exonuclease RecJ                                                                          |
| ACD58386 | 8.167282652 | 8.670560656 | 8.900842662 | hypothetical protein                                                                                                   |
| ACD58387 | 9.976463883 | 9.999873195 | 10.651563   | conserved hypothetical protein                                                                                         |
| ACD58389 | 8.769447784 | 8.913194605 | 7.975601528 | RpfD regulatory protein                                                                                                |
| ACD58390 | 7.806601175 | 8.157281242 | 8.160083186 | peptide chain release factor 2                                                                                         |

|          |             |             |              |                                                              |
|----------|-------------|-------------|--------------|--------------------------------------------------------------|
| ACD58391 | 7.175055469 | 7.271855164 | 7.765852953  | lysyl-tRNA synthetase                                        |
| ACD58392 | 7.815857178 | 8.06769249  | 7.818869729  | Two-component system response regulator RpfG                 |
| ACD58393 | 7.558734475 | 7.81677888  | 6.849448889  | two component sensor-regulator hybrid protein RpfC           |
| ACD58396 | 8.574998371 | 8.25363006  | 8.32284752   | hypothetical protein                                         |
| ACD58397 | 6.870697611 | 7.60295862  | 5.438984753  | conserved hypothetical protein                               |
| ACD58399 | 9.341961293 | 8.724097697 | 9.223217388  | SpoVT / AbrB like domain protein                             |
| ACD58400 | 7.935783846 | 7.87099345  | 8.453431153  | PIN domain, putative                                         |
| ACD58401 | 7.290903551 | 7.367982544 | 7.708063051  | aconitate hydratase 2                                        |
| ACD58402 | 9.271467697 | 0           | 7.985033574  | hypothetical protein                                         |
| ACD58403 | 8.34978987  | 8.599235955 | 8.670054263  | beta-ketoadipate enol-lactone hydrolase                      |
| ACD58414 | 0           | 0           | 0            | ISXo3 transposase ORF B                                      |
| ACD58426 | 11.46290098 | 10.05851944 | 10.43933224  | hypothetical protein                                         |
| ACD58435 | 8.043278879 | 9.281614801 | 6.86246379   | hypothetical protein                                         |
| ACD58436 | 0           | 0           | 7.371933427  | hypothetical protein                                         |
| ACD58443 | 7.694392713 | 7.643769625 | 7.225583429  | TonB-dependent receptor                                      |
| ACD58449 | 3.582026034 | 3.524853531 | 3.48595486   | Tal3a, TAL effector AvrBs3/PthA family                       |
| ACD58452 | 0           | 0           | 7.04384754   | hypothetical protein                                         |
| ACD58455 | 5.703277924 | 5.622602428 | 6.089301106  | Tal3b, TAL effector AvrBs3/PthA family                       |
| ACD58458 | 4.689953258 | 5.121661981 | 5.44957458   | Rhs element Vgr protein                                      |
| ACD58459 | 1.171232452 | 0           | -0.487196656 | conserved hypothetical protein                               |
| ACD58460 | 5.543972166 | 5.423480688 | 5.681775325  | conserved hypothetical protein                               |
| ACD58461 | 0           | 0           | 0            | conserved hypothetical protein                               |
| ACD58462 | 6.891917336 | 6.407245667 | 6.863653549  | conserved hypothetical protein                               |
| ACD58463 | 10.90531178 | 0           | 12.04211078  | conserved hypothetical protein                               |
| ACD58467 | 5.723457537 | 5.73276304  | 5.335247418  | conserved hypothetical protein                               |
| ACD58473 | 7.777630121 | 7.907527645 | 7.666820489  | transcriptional regulator Lacl family                        |
| ACD58476 | 2.965477708 | 3.368377246 | 1.871977663  | ISXo5 transposase                                            |
| ACD58482 | 7.055260741 | 7.054588039 | 7.014768134  | NAD-glutamate dehydrogenase                                  |
| ACD58483 | 7.626168971 | 8.644598986 | 6.383049316  | hypothetical protein                                         |
| ACD58484 | 7.634615048 | 7.376290383 | 7.336470855  | ISXoo6 transposase                                           |
| ACD58489 | 7.593719777 | 7.730918415 | 7.282171035  | conserved hypothetical protein                               |
| ACD58491 | 6.668374456 | 6.502123706 | 6.305199005  | integral membrane transporter                                |
| ACD58492 | 7.169925001 | 7.353199767 | 5.864780437  | formate dehydrogenase family accessory protein FdhD          |
| ACD58493 | 6.786544089 | 6.823813037 | 6.331492049  | oxidoreductase alpha (molybdopterin) subunit                 |
| ACD58494 | 7.405345724 | 6.713805772 | 6.694434504  | conserved hypothetical protein                               |
| ACD58495 | 7.388792257 | 7.369911368 | 6.216709002  | metabolite transport protein                                 |
| ACD58500 | 8.842256047 | 9.381906283 | 8.69368906   | glutamine amidotransferase                                   |
| ACD58501 | 7.134323634 | 7.203299056 | 6.170021178  | glutamine synthetase                                         |
| ACD58503 | 9.491833059 | 10.92953212 | 0            | periplasmic putrescine-binding protein/x3b permease protein  |
| ACD58504 | 7.760460488 | 7.786831565 | 6.540603885  | transport protein                                            |
| ACD58505 | 6.916201933 | 7.08390476  | 5.799434465  | transport protein                                            |
| ACD58506 | 6.500999582 | 6.573454815 | 5.572337944  | outer membrane protein OprN                                  |
| ACD58507 | 7.76670116  | 7.531599798 | 6.905314793  | ATP-binding component of putrescine transport system         |
| ACD58508 | 8.071698323 | 8.083585697 | 7.606012791  | polyamine transport protein                                  |
| ACD58509 | 7.538351917 | 7.457364461 | 6.751316423  | putrescine transport protein/x3b permease                    |
| ACD58511 | 6.699676553 | 6.812998718 | 6.682025441  | aldehyde-dehydrogenase like protein Ynel                     |
| ACD58522 | 6.894247847 | 6.852261076 | 5.738600323  | repressor                                                    |
| ACD58523 | 7.881107841 | 8.02017436  | 7.59324171   | soluble lytic murein transglycosylase                        |
| ACD58524 | 8.068547213 | 8.394642752 | 6.57535923   | ubiquinol-Cytochrome c reductase, iron-sulfur subunit        |
| ACD58525 | 7.588302378 | 7.882025493 | 5.957993508  | ubiquinol cytochrome C oxidoreductase, cytochrome B subunit  |
| ACD58526 | 7.403838619 | 7.65442838  | 5.382432087  | ubiquinol cytochrome C oxidoreductase, cytochrome C1 subunit |
| ACD58527 | 8.101024938 | 8.041127967 | 6.526386558  | stringent starvation protein A                               |
| ACD58528 | 9.583917671 | 9.971500445 | 10.25728176  | stringent starvation protein B                               |
| ACD58529 | 8.890902631 | 8.141713774 | 7.635544007  | hypothetical protein                                         |
| ACD58530 | 0           | 10.24748847 | 0            | hypothetical protein                                         |
| ACD58533 | 5.754978336 | 6.286530039 | 5.501735297  | ATP-dependent DNA helicase                                   |
| ACD58534 | 6.302871016 | 5.808240877 | 6.004528358  | ATP-dependent DNA helicase                                   |
| ACD58535 | 9.841383508 | 7.147255813 | 7.687319689  | conserved domain protein                                     |
| ACD58536 | 5.316536781 | 5.288576353 | 5.466039743  | ATP-dependent DNA helicase                                   |
| ACD58539 | 10.1974133  | 9.258158489 | 8.170070266  | conserved domain protein                                     |
| ACD58540 | 11.2777872  | 12.17431403 | 11.54741512  | transcriptional regulator, HTH motif containing              |
| ACD58541 | 10.07694917 | 10.76054532 | 10.42175979  | conserved hypothetical protein                               |
| ACD58542 | 10.28343567 | 11.06469562 | 8.747635795  | hypothetical protein                                         |
| ACD58543 | 12.44859385 | 13.39973187 | 13.18453291  | TipA                                                         |

|          |             |             |              |                                                                                              |
|----------|-------------|-------------|--------------|----------------------------------------------------------------------------------------------|
| ACD58546 | 7.935866332 | 7.064408657 | 6.03336353   | ATP-dependent DNA ligase                                                                     |
| ACD58549 | 6.45751878  | 6.679311189 | 6.356730138  | conserved hypothetical protein                                                               |
| ACD58550 | 6.159290106 | 6.659724804 | 7.154645988  | ISXo3 transposase ORF B                                                                      |
| ACD58551 | 8.103864771 | 8.935159155 | 10.62542575  | virulence protein                                                                            |
| ACD58555 | 7.064494885 | 7.433810747 | 7.159800714  | YjeF family protein                                                                          |
| ACD58556 | 6.666799191 | 7.459111895 | 7.313880701  | conserved hypothetical protein                                                               |
| ACD58557 | 7.741669219 | 7.983392684 | 7.058933363  | N-acetylmuramoyl-L-alanine amidase                                                           |
| ACD58558 | 6.814332516 | 6.386436777 | 6.307954867  | DNA mismatch repair protein MutL                                                             |
| ACD58559 | 6.471231365 | 6.857993432 | 6.31210605   | lipoprotein, putative                                                                        |
| ACD58560 | 6.857719794 | 7.279369144 | 6.125136529  | GumN protein                                                                                 |
| ACD58564 | 7.827050483 | 7.935612967 | 9.75329699   | putative Probable protease HtpX homolog                                                      |
| ACD58569 | 12.06212036 | 12.91015925 | 11.76324142  | major cold shock protein                                                                     |
| ACD58570 | 9.103114675 | 9.042502074 | 8.429335599  | glutathione S-transferase                                                                    |
| ACD58572 | 7.057634388 | 7.457709193 | 7.166635114  | conserved hypothetical protein                                                               |
| ACD58573 | 8.075580763 | 8.083239966 | 9.260357396  | adenine phosphoribosyltransferase                                                            |
| ACD58575 | 7.15171678  | 7.321693638 | 7.347904787  | ABC transporter ATP-binding protein                                                          |
| ACD58576 | 9.58979906  | 8.697770345 | 8.939576276  | hypothetical protein                                                                         |
| ACD58579 | 8.302876498 | 8.845443006 | 9.232135478  | superoxide dismutase                                                                         |
| ACD58581 | 6.660766075 | 6.557488209 | 6.656052968  | tRNA/rRNA methyltransferase                                                                  |
| ACD58583 | 7.213425053 | 7.650448648 | 6.23988871   | phosphate-binding protein                                                                    |
| ACD58584 | 6.72975668  | 6.53488179  | 5.850771925  | Putative signal protein with GGDEF and EAL domains                                           |
| ACD58586 | 7.823354501 | 7.636885587 | 8.149081497  | translation elongation factor P                                                              |
| ACD58587 | 6.560105042 | 6.983233054 | 6.260159302  | conserved hypothetical protein                                                               |
| ACD58588 | 7.163196797 | 6.672015106 | 6.344911918  | Amidohydrolase family protein                                                                |
| ACD58589 | 7.367161356 | 7.053621838 | 5.962618426  | ubiquinone biosynthesis O-methyltransferase                                                  |
| ACD58590 | 7.119117507 | 7.488233808 | 6.110014472  | phosphoglycolate phosphatase, bacterial                                                      |
| ACD58591 | 6.975435301 | 6.713503369 | 6.39516565   | conserved hypothetical protein                                                               |
| ACD58593 | 8.393879496 | 7.833427761 | 8.665321703  | transposase                                                                                  |
| ACD58594 | 9.917298973 | 9.970220956 | 8.711570619  | hypothetical protein                                                                         |
| ACD58600 | 0           | 0           | -1.001631167 | ISXo8 transposase                                                                            |
| ACD58601 | 8.712791785 | 9.363247749 | 8.15522808   | general stress protein                                                                       |
| ACD58603 | 12.30727482 | 12.09000984 | 12.51934631  | conserved hypothetical protein                                                               |
| ACD58605 | 9.915259454 | 10.53028928 | 9.259703254  | hypothetical protein                                                                         |
| ACD58608 | 8.11816243  | 8.515404174 | 8.364458623  | DnaK supressor                                                                               |
| ACD58609 | 6.10772971  | 5.330518962 | 5.264040936  | peptidase, S41 family                                                                        |
| ACD58613 | 0           | 7.278737504 | 6.893155889  | hypothetical protein                                                                         |
| ACD58614 | 9.668064152 | 10.16764394 | 10.03659949  | conserved hypothetical protein                                                               |
| ACD58615 | 7.625299717 | 7.494895575 | 7.595048569  | ornithine carbamoyltransferase                                                               |
| ACD58616 | 7.149574392 | 7.219149155 | 7.117476877  | argininosuccinate synthase                                                                   |
| ACD58617 | 8.540147416 | 8.072513163 | 8.205695519  | acetyltransferase, gnat family                                                               |
| ACD58618 | 7.223827961 | 7.160587462 | 6.112251827  | acetylornithine deacetylase                                                                  |
| ACD58619 | 7.190387693 | 6.994217647 | 6.760101161  | acetylglutamate kinase                                                                       |
| ACD58620 | 7.996919716 | 7.436211821 | 6.496719586  | amino-acid acetyltransferase                                                                 |
| ACD58621 | 7.945268244 | 7.00929118  | 6.391302027  | N-acetyl-gamma-glutamyl-phosphate reductase                                                  |
| ACD58622 | 7.198317342 | 6.976157391 | 6.016777094  | argininosuccinate lyase                                                                      |
| ACD58623 | 7.443465756 | 7.126838671 | 6.682095691  | cupin domain protein                                                                         |
| ACD58624 | 9.034433085 | 8.375643325 | 7.956893024  | conserved hypothetical protein                                                               |
| ACD58625 | 6.965668864 | 7.141718882 | 6.270730756  | glutamate 5-kinase                                                                           |
| ACD58626 | 6.97260076  | 6.750110694 | 5.174893733  | gamma-glutamyl phosphate reductase                                                           |
| ACD58627 | 6.954963992 | 6.845665673 | 6.898075301  | alpha-amino acid ester hydrolase                                                             |
| ACD58632 | 0           | 0           | 0            | hypothetical protein                                                                         |
| ACD58633 | 6.839695103 | 7.244582661 | 6.157514693  | ABC transporter, CydDC cysteine exporter (CydDC-E) family, permease/ATP-binding protein CydD |
| ACD58634 | 6.699745948 | 6.663216513 | 5.803888292  | ABC transporter, CydDC cysteine exporter (CydDC-E) family, permease/ATP-binding protein CydC |
| ACD58638 | 8.831772759 | 8.790283326 | 6.518209363  | conserved hypothetical protein                                                               |
| ACD58639 | 8.570884111 | 8.578874575 | 4.802736065  | hypothetical protein                                                                         |
| ACD58640 | 8.042660751 | 0           | 7.925477296  | hypothetical protein                                                                         |
| ACD58643 | 7.301313274 | 7.291032526 | 5.907904934  | cation efflux system protein                                                                 |
| ACD58644 | 7.29351763  | 7.426583454 | 6.31344722   | cation efflux system protein                                                                 |
| ACD58645 | 6.540808435 | 6.382445921 | 5.537159371  | RND superfamily protein                                                                      |
| ACD58646 | 6.774997849 | 6.053745635 | 5.435531922  | RND superfamily protein                                                                      |
| ACD58647 | 7.558129849 | 7.813075701 | 6.367519591  | transport protein                                                                            |
| ACD58654 | 5.876212414 | 6.136730737 | 8.111052185  | ISXoo2 transposase                                                                           |

|          |             |             |             |                                                           |
|----------|-------------|-------------|-------------|-----------------------------------------------------------|
| ACD58655 | 8.73420154  | 8.247566795 | 8.941338171 | transposase                                               |
| ACD58657 | 5.575248788 | 6.155532699 | 5.940368808 | putative methyltransferase                                |
| ACD58658 | 7.834698576 | 8.138333245 | 8.270094387 | pantetheine-phosphate adenyllyltransferase                |
| ACD58659 | 8.249217769 | 8.891416149 | 8.489406456 | lipoprotein, putative                                     |
| ACD58660 | 8.219700961 | 8.534046035 | 7.194658374 | ferredoxin                                                |
| ACD58661 | 7.507136558 | 7.652443472 | 6.673796665 | gamma-glutamyltransferase                                 |
| ACD58669 | 6.822717403 | 6.532865503 | 6.014658798 | TonB-dependent outer membrane receptor                    |
| ACD58670 | 7.227105676 | 7.085265302 | 7.183565912 | TonB-dependent receptor                                   |
| ACD58671 | 6.702283524 | 6.791944272 | 6.091752718 | putative phytase                                          |
| ACD58675 | 0           | 0           | 0.828785916 | ISXo8 transposase                                         |
| ACD58678 | 7.600782659 | 6.755728829 | 7.786544089 | conserved hypothetical protein                            |
| ACD58681 | 6.333835158 | 6.338864715 | 6.709649059 | transcriptional regulator AsnC/Irp family                 |
| ACD58682 | 6.283945842 | 6.741938819 | 6.271343499 | S-adenosylmethionine-x3atRNA ribosyltransferase-isomerase |
| ACD58683 | 7.430628173 | 7.197845738 | 7.429615964 | queuine tRNA-ribosyltransferase                           |
| ACD58684 | 8.242783498 | 8.405745651 | 8.305537392 | preprotein translocase, YajC subunit                      |
| ACD58686 | 7.545651818 | 7.553083981 | 7.235219653 | protein-export membrane protein SecD                      |
| ACD58687 | 7.309549112 | 7.532792272 | 7.157063927 | protein-export membrane protein SecF                      |
| ACD58689 | 6.138232884 | 5.310561889 | 5.730131799 | ISXoo6 transposase                                        |
| ACD58691 | 8.775277756 | 8.081206457 | 8.547850796 | transposase                                               |
| ACD58694 | 7.420793962 | 7.454299294 | 7.266496099 | putative ISXoo14 transposase                              |
| ACD58697 | 0           | 8.829332679 | 9.35549646  | putative transcriptional regulator, ArsR family           |
| ACD58700 | 0           | 8.448863793 | 9.973424728 | hypothetical protein                                      |
| ACD58707 | 14.06746797 | 15.06427122 | 14.89240051 | conserved hypothetical protein                            |
| ACD58710 | 7.877449792 | 7.322054325 | 6.851761532 | carbonic anhydrase                                        |
| ACD58714 | 9.069551806 | 9.022978055 | 9.562459957 | peptidyl-prolyl cis-trans isomerase                       |
| ACD58715 | 8.091440676 | 7.827888872 | 7.067939821 | MutT/nudix family protein                                 |
| ACD58716 | 6.972003304 | 7.153774942 | 6.574443668 | 3-mercaptopyruvate sulfurtransferase                      |
| ACD58717 | 7.264799125 | 7.018344858 | 7.274820737 | lipoprotein, putative                                     |
| ACD58719 | 7.781812124 | 7.538297591 | 7.265089908 | mosc                                                      |
| ACD58720 | 7.031902415 | 7.300370866 | 6.497307381 | conserved hypothetical protein                            |
| ACD58721 | 6.666870185 | 6.569592862 | 5.902879141 | acetyltransferase                                         |
| ACD58722 | 6.898982227 | 6.336754686 | 8.374174424 | hypothetical protein                                      |
| ACD58723 | 6.472252177 | 6.54223483  | 6.018033223 | methyltransferase                                         |
| ACD58724 | 7.339778757 | 7.701348053 | 7.28118821  | NAD(+) kinase                                             |
| ACD58725 | 7.285920016 | 7.315113325 | 6.708670077 | cytosolic 5'-nucleotidase 1A                              |
| ACD58732 | 10.69128988 | 9.45093079  | 0           | hypothetical protein                                      |
| ACD58744 | 8.776321166 | 9.226009916 | 10.27289801 | HesB protein family                                       |
| ACD58745 | 11.67494697 | 11.80640462 | 11.68909382 | 30S ribosomal protein S6                                  |
| ACD58746 | 11.61398279 | 12.2732915  | 11.80491348 | ribosomal protein S18                                     |
| ACD58747 | 8.55677426  | 8.96923109  | 8.493078866 | ribosomal protein L9                                      |
| ACD58748 | 7.214552265 | 7.097199924 | 7.069766602 | chromosome segregation protein SMC                        |
| ACD58749 | 7.179958837 | 7.541445144 | 6.439269069 | cell division protein ZipA                                |
| ACD58750 | 7.539019189 | 9.305995593 | 0           | putative membrane protein                                 |
| ACD58753 | 7.390366749 | 7.071955691 | 6.070249775 | DNA ligase                                                |
| ACD58754 | 6.822653678 | 6.94963998  | 6.065281486 | tRNA synthetases class II (D, K and N) subfamily          |
| ACD58755 | 7.150366736 | 7.959718    | 6.575442434 | conserved hypothetical protein                            |
| ACD58756 | 6.323580837 | 6.960407452 | 7.027120868 | IDI2                                                      |
| ACD58757 | 7.940613118 | 8.167021664 | 7.08537154  | DNA gyrase, A subunit                                     |
| ACD58758 | 7.495831048 | 7.692922314 | 7.627212845 | ISXoo3 transposase ORF A                                  |
| ACD58759 | 9.363712074 | 9.229969983 | 9.03140071  | transposase                                               |
| ACD58766 | 6.798789305 | 7.126714796 | 6.2449213   | formiminoglutamate deiminase                              |
| ACD58767 | 6.204979931 | 6.355349334 | 5.781464633 | histidine utilization repressor                           |
| ACD58771 | 8.926411643 | 9.154714333 | 7.725618473 | FHA domain protein                                        |
| ACD58772 | 9.425616655 | 9.334836396 | 8.938256382 | hypothetical protein                                      |
| ACD58775 | 7.946824417 | 8.00445083  | 7.858534337 | phosphoserine aminotransferase                            |
| ACD58776 | 8.028966899 | 7.990143684 | 8.255052182 | P-protein                                                 |
| ACD58777 | 6.665478048 | 6.894514644 | 5.783650467 | 3-phosphoshikimate 1-carboxyvinyltransferase              |
| ACD58782 | 6.45679301  | 6.417763082 | 5.810710435 | YapH protein                                              |
| ACD58783 | 10.42005495 | 11.22231191 | 10.45457691 | hypothetical protein                                      |
| ACD58789 | 9.922327207 | 8.538949372 | 10.00277283 | choline dehydrogenase                                     |
| ACD58792 | 6.4128882   | 6.466291039 | 6.006798436 | putative ISXoo4 transposase                               |
| ACD58796 | 5.212071235 | 7.949213909 | 4.097492814 | transposase                                               |
| ACD58797 | 6.706157536 | 7.035700881 | 5.952067929 | N-acetylmuramoyl-L-alanine amidase                        |
| ACD58798 | 7.018745434 | 6.971486075 | 5.899325501 | conserved hypothetical protein                            |

|           |             |             |             |                                                                                                                           |
|-----------|-------------|-------------|-------------|---------------------------------------------------------------------------------------------------------------------------|
| ACD58799  | 11.03999512 | 9.611959848 | 10.05177992 | hypothetical protein                                                                                                      |
| ACD58800  | 7.856998135 | 7.843066798 | 7.762275722 | poly(A) polymerase (PAP) (Plasmid copy number protein)                                                                    |
| ACD58801  | 6.959480382 | 6.945326777 | 6.050725877 | 2-amino-4-hydroxy-6-hydroxymethylidihydropteridine pyrophosphokinase                                                      |
| ACD58802  | 7.835305138 | 8.031207701 | 8.095729306 | 3-methyl-2-oxobutanoate hydroxymethyltransferase                                                                          |
| ACD58803  | 7.445544634 | 7.667033461 | 7.231374804 | pantoate--beta-alanine ligase                                                                                             |
| ACD58804  | 10.15579223 | 10.37619052 | 12.32808303 | aspartate 1-decarboxylase                                                                                                 |
| ACD58805  | 7.461954128 | 7.757616689 | 8.471756491 | glucose-6-phosphate isomerase                                                                                             |
| ACD58806  | 9.17029815  | 9.514260367 | 10.05612286 | addiction module antitoxin, Axe family, putative                                                                          |
| ACD58807  | 8.075425666 | 8.191898177 | 8.58784126  | conserved hypothetical protein                                                                                            |
| ACD58809  | 10.03838405 | 8.756442904 | 9.569834727 | putative helicase                                                                                                         |
| ACD58811  | 6.736618404 | 6.703668295 | 6.250743713 | glucan 1,4-beta-glucosidase                                                                                               |
| ACD58812  | 7.138599474 | 7.027928107 | 6.691687694 | sodium/glucose cotransport protein                                                                                        |
| ACD58814  | 0           | 10.37932421 | 9.554803705 | hypothetical protein                                                                                                      |
| ACD58815  | 6.686668598 | 6.536149284 | 7.422359164 | IS1112 transposase                                                                                                        |
| ACD58817  | 10.99665708 | 11.69461906 | 9.955495896 | hypothetical protein                                                                                                      |
| ACD58819  | 7.621033518 | 7.206496712 | 7.037656765 | oligopeptide transporter                                                                                                  |
| ACD58820  | 7.617188266 | 7.955086086 | 7.482638574 | peptidase, S54 (rhomboid) family                                                                                          |
| ACD58822  | 6.743299528 | 7.774180869 | 7.516787362 | conserved hypothetical protein                                                                                            |
| ACD58823  | 7.16413259  | 7.710413857 | 7.359327889 | conserved hypothetical protein                                                                                            |
| ACD58824  | 9.212654447 | 8.835930389 | 9.83218273  | transcriptional regulator MarR family                                                                                     |
| ACD58827  | 6.552830455 | 6.23109635  | 5.838263525 | extracellular protease                                                                                                    |
| ACD58828  | 7.447637049 | 8.6360409   | 9.878233346 | hypothetical protein                                                                                                      |
| ACD58829  | 8.416476659 | 7.501359524 | 7.352899737 | hypothetical protein                                                                                                      |
| ACD58830  | 0           | 9.650956585 | 10.39175913 | biotin acetyl-CoA-carboxylase synthetase                                                                                  |
| ACD58833  | 7.230308706 | 5.555402057 | 6.313628609 | hypothetical protein                                                                                                      |
| ACD58834  | 6.195717675 | 7.160879862 | 6.467390352 | glutathione peroxidase                                                                                                    |
| ACD58837  | 6.957752124 | 6.79199635  | 6.682587342 | fumarate hydratase                                                                                                        |
| ACD58838  | 6.304989184 | 5.752159835 | 5.777088265 | glutathione S-transferase                                                                                                 |
| ACD58839  | 4.210856386 | 3.233605873 | 4.046002047 | isrso5-transposase protein                                                                                                |
| ACD58840  | 9.108989599 | 8.430268544 | 9.337010801 | isrso5-transposase protein                                                                                                |
| ACD58841  | 5.260507478 | 4.43956995  | 4.861528644 | IS1112 transposase                                                                                                        |
| ACD58843  | 0           | 0           | 0           | conserved hypothetical protein                                                                                            |
| ACD58847  | 6.265268102 | 5.630513227 | 6.916082477 | transposase                                                                                                               |
| ACD58849  | 0           | 0           | 0           | phosphinothricin N-acetyltransferase                                                                                      |
| ACD58853  | 0           | 0           | 0           | ATPase, AAA family                                                                                                        |
| ACD58854  | 0           | 0           | 0           | peptidase S8 and S53, subtilisin, kexin, sedolisin                                                                        |
| ACD58857  | 3.437241058 | 2.819588486 | 5.647400861 | transposase                                                                                                               |
| ACD58859  | 0           | 0           | 0           | conserved hypothetical protein                                                                                            |
| ACD58860  | 0           | 0           | 0           | conserved hypothetical protein                                                                                            |
| ACD58861  | 0           | 0           | 0           | transcriptional regulator, ArsR family                                                                                    |
| ACD58862  | 0           | 0           | 0           | arsenate reductase                                                                                                        |
| ACD58863  | 0           | 0           | 0           | arsenate reductase                                                                                                        |
| ACD58864  | 0           | 0           | 0           | arsenical resistance protein ArsH                                                                                         |
| ACD58865  | 0           | 0           | 0           | arsenical membrane pump                                                                                                   |
| ACD58866  | 0           | 0           | 0           | cointegrase                                                                                                               |
| ACD58867  | 0           | 0           | 0           | transposase                                                                                                               |
| ACD58868  | 0           | 0           | 0           | transposase                                                                                                               |
| PXO_rna20 | 0           | 0           | 0           | XO_rna20 cDNA:pseudogene<br>chromosome:GCA_000019585.1:Chromosome:2311816:2311902:1<br>gene:PXO_rna20 transcript:PXO_rna2 |
| ACD58874  | 8.753517628 | 9.12869036  | 8.032398434 | hypothetical protein                                                                                                      |
| ACD58875  | 7.89284635  | 9.303189396 | 8.136903984 | conserved hypothetical protein                                                                                            |
| ACD58885  | 7.81677888  | 7.819227491 | 8.189063485 | sugar ABC transporter ATP-binding protein                                                                                 |
| ACD58887  | 12.70447647 | 13.19870593 | 13.89785491 | conserved hypothetical protein                                                                                            |
| ACD58888  | 8.741001743 | 8.655412655 | 8.267769861 | succinate dehydrogenase, cytochrome b556 subunit                                                                          |
| ACD58889  | 8.591593404 | 8.932793486 | 8.47208155  | succinate dehydrogenase, hydrophobic membrane anchor protein                                                              |
| ACD58890  | 8.700984094 | 8.582119395 | 8.201393719 | succinate dehydrogenase, flavoprotein subunit                                                                             |
| ACD58891  | 10.44233188 | 10.27494883 | 7.639152558 | putative secreted protein                                                                                                 |
| ACD58892  | 8.118987778 | 7.940196121 | 7.33948483  | succinate dehydrogenase iron-sulfur protein                                                                               |
| ACD58893  | 9.108202951 | 8.910037046 | 8.564263834 | TPR repeat region superfamily                                                                                             |
| ACD58894  | 8.712189931 | 8.190975291 | 6.588552745 | putative membrane protein                                                                                                 |
| ACD58895  | 6.959665843 | 7.137196099 | 6.644966637 | lipoprotein releasing system transmembrane protein                                                                        |
| ACD58896  | 6.947537589 | 7.164434329 | 6.704097304 | lipoprotein releasing system, ATP-binding protein                                                                         |
| ACD58897  | 8.986792039 | 8.313454476 | 8.668104938 | hypothetical protein                                                                                                      |

|           |             |             |             |                                                                                                                           |
|-----------|-------------|-------------|-------------|---------------------------------------------------------------------------------------------------------------------------|
| ACD58901  | 7.107311247 | 7.449371534 | 6.433373455 | DNA internalization-related competence protein ComEC/Rec2                                                                 |
| ACD58902  | 8.390143155 | 8.646778293 | 7.678839541 | biopolymer transport protein                                                                                              |
| ACD58903  | 8.24339299  | 8.044180978 | 7.417439052 | biopolymer transport protein                                                                                              |
| ACD58904  | 7.281104732 | 7.373500315 | 6.05381513  | lipid A export permease/ATP-binding protein MsbA                                                                          |
| ACD58905  | 7.081222438 | 7.109308317 | 5.691375035 | tetraacyldisaccharide 4'-kinase                                                                                           |
| ACD58907  | 6.931375766 | 6.524044864 | 5.421815743 | 3-deoxy-D-manno-octulosonate cytidyltransferase                                                                           |
| ACD58908  | 6.876737938 | 6.668246796 | 5.98627212  | low molecular weight phosphotyrosine protein phosphatase                                                                  |
| ACD58909  | 7.288672318 | 7.246968562 | 7.386664394 | conserved hypothetical protein                                                                                            |
| ACD58910  | 6.940636607 | 6.519699148 | 5.908070718 | excinuclease ABC, C subunit                                                                                               |
| ACD58911  | 8.993181832 | 9.214382268 | 7.256142627 | CDP-diacylglycerol--glycerol-3-phosphate 3-phosphatidyltransferase                                                        |
| PXO_rna21 | 0           | 0           | 0           | XO_rna21 cdna:pseudogene<br>chromosome:GCA_000019585.1:Chromosome:2344873:2344948:1<br>gene:PXO_rna21 transcript:PXO_rna2 |
| PXO_rna22 | 0           | 0           | 0           | XO_rna22 cdna:pseudogene<br>chromosome:GCA_000019585.1:Chromosome:2345017:2345090:1<br>gene:PXO_rna22 transcript:PXO_rna2 |
| PXO_rna23 | 0           | 0           | 0           | XO_rna23 cdna:pseudogene<br>chromosome:GCA_000019585.1:Chromosome:2345173:2345248:1<br>gene:PXO_rna23 transcript:PXO_rna2 |
| ACD58914  | 0           | 0           | 0           | IS1113 transposase                                                                                                        |
| ACD58915  | 6.805008636 | 6.452826026 | 7.077264366 | RhsD protein                                                                                                              |
| ACD58916  | 7.608447045 | 7.442935204 | 8.591810296 | RhsD protein                                                                                                              |
| ACD58929  | 8.99214244  | 7.990336592 | 8.759951414 | hypothetical protein                                                                                                      |
| ACD58930  | 6.409877976 | 6.443359662 | 7.055846386 | phage replication protein                                                                                                 |
| ACD58931  | 8.598878788 | 8.507247581 | 8.616328288 | helix-destabilizing protein                                                                                               |
| ACD58932  | 10.33233871 | 8.891094082 | 10.58275356 | hypothetical protein                                                                                                      |
| ACD58933  | 7.83161127  | 7.311612098 | 6.812357029 | hypothetical protein                                                                                                      |
| ACD58934  | 7.919661864 | 7.162814256 | 7.684930918 | phage-related protein                                                                                                     |
| ACD58935  | 6.928950601 | 6.54389022  | 6.566360055 | phage-related protein                                                                                                     |
| ACD58939  | 0           | 0           | 0           | hypothetical protein                                                                                                      |
| ACD58940  | 0           | 0           | 0           | hypothetical protein                                                                                                      |
| ACD58941  | 0           | 0           | 0           | hypothetical protein                                                                                                      |
| ACD58943  | 0           | 0           | 0           | transposase                                                                                                               |
| ACD58946  | 4.193692905 | 3.555607587 | 4.079924192 | ISXo8                                                                                                                     |
| ACD58948  | 5.334768477 | 4.936524874 | 5.467677276 | Tal6a, TAL effector AvrBs3/PthA                                                                                           |
| ACD58963  | 6.067464478 | 6.097486494 | 5.900770223 | putative transposase                                                                                                      |
| ACD58968  | 7.874194488 | 7.681898983 | 6.256457806 | ethyl tert-butyl ether degradation EthD                                                                                   |
| ACD58971  | 9.818141153 | 9.371750512 | 8.100436325 | hypothetical protein                                                                                                      |
| ACD58977  | 9.977480284 | 11.18482576 | 11.45481335 | hypothetical protein                                                                                                      |
| ACD58978  | 7.343487772 | 7.64653711  | 7.826510354 | piperidine-6-carboxylate dehydrogenase                                                                                    |
| ACD58979  | 9.054978678 | 8.667462857 | 9.870130417 | conserved hypothetical protein                                                                                            |
| ACD58980  | 7.689655596 | 7.614400662 | 7.752206676 | conserved hypothetical protein                                                                                            |
| ACD58981  | 7.220832953 | 7.227201967 | 7.188628405 | dihydroorotate oxidase                                                                                                    |
| ACD58982  | 6.843091931 | 6.312367485 | 5.861342535 | UDP-N-acetylenolpyruvoylglucosamine reductase                                                                             |
| ACD58983  | 7.045257292 | 6.799216853 | 5.74728803  | integral membrane protein                                                                                                 |
| ACD58984  | 9.444174236 | 8.841935391 | 9.207092434 | pyridoxal phosphate biosynthetic protein                                                                                  |
| ACD58985  | 10.88053248 | 7.855198638 | 10.72082567 | aspartate racemase                                                                                                        |
| ACD58989  | 7.457175645 | 7.503515704 | 8.40955217  | prop transport protein                                                                                                    |
| ACD58992  | 0           | 0           | 0           | hypothetical protein                                                                                                      |
| ACD58993  | 7.426524752 | 7.238404739 | 8.649626236 | two-component system sensor protein                                                                                       |
| ACD58994  | 8.262094845 | 8.062002951 | 9.746883765 | two-component system regulatory protein                                                                                   |
| ACD58998  | 6.031154756 | 6.003102963 | 6.338456506 | FAD dependent oxidoreductase, putative                                                                                    |
| ACD59004  | 6.701077692 | 6.006827603 | 5.991428876 | D-beta-hydroxybutyrate dehydrogenase                                                                                      |
| ACD59008  | 8.410154514 | 8.441010316 | 8.206179219 | phosphoenolpyruvate synthase                                                                                              |
| ACD59009  | 7.771892179 | 7.704118059 | 5.906279725 | small conductance mechanosensitive ion channel                                                                            |
| ACD59013  | 7.459685707 | 7.427178731 | 6.707138224 | manganese transport protein                                                                                               |
| ACD59015  | 9.853390656 | 10.93318164 | 10.15488138 | methyl-accepting chemotaxis protein                                                                                       |
| ACD59016  | 9.845292451 | 11.01415301 | 9.726488959 | conserved hypothetical protein                                                                                            |
| ACD59018  | 8.427040414 | 8.579685522 | 7.915837561 | inner membrane protein YeiH                                                                                               |
| ACD59021  | 6.851074377 | 6.625733679 | 6.294911097 | NADH dehydrogenase                                                                                                        |
| ACD59022  | 5.895094152 | 6.264643391 | 5.738311181 | conserved hypothetical protein                                                                                            |
| ACD59026  | 8.486070744 | 7.60295862  | 7.456666537 | conserved hypothetical protein                                                                                            |
| ACD59027  | 7.847790256 | 7.647638302 | 8.180645174 | transposase                                                                                                               |
| ACD59039  | 11.03172188 | 11.72054782 | 8.767492592 | ribosomal protein L36                                                                                                     |
| ACD59040  | 8.121253758 | 8.778954311 | 8.982448897 | conserved hypothetical protein                                                                                            |
| ACD59041  | 9.527435953 | 12.28080846 | 10.40195679 | hypothetical protein                                                                                                      |

|          |             |             |             |                                                                                                                        |
|----------|-------------|-------------|-------------|------------------------------------------------------------------------------------------------------------------------|
| ACD59042 | 10.16931122 | 11.55967344 | 10.89091783 | hypothetical protein                                                                                                   |
| ACD59043 | 7.343336752 | 7.102931025 | 7.307701737 | porphyromonas-type peptidyl-arginine deiminase                                                                         |
| ACD59044 | 7.299931474 | 6.93376146  | 9.158493561 | beta-alanine synthetase                                                                                                |
| ACD59045 | 7.903490247 | 7.99150484  | 8.517267818 | phosphinothricin N-acetyltransferase                                                                                   |
| ACD59046 | 6.811162729 | 6.709483644 | 6.586231814 | pheromone shutdown protein                                                                                             |
| ACD59057 | 9.225985824 | 9.254780622 | 9.078217536 | segregation and condensation protein A                                                                                 |
| ACD59058 | 8.823701601 | 8.870084168 | 7.368192134 | segregation and condensation protein B, putative                                                                       |
| ACD59059 | 7.890829691 | 7.981139119 | 6.716071775 | ribosomal large subunit pseudouridine synthase B                                                                       |
| ACD59061 | 6.506878    | 6.813575993 | 6.790772038 | glutamine cyclotransferase                                                                                             |
| ACD59062 | 0           | 0           | 0           | ISXo5 transposase                                                                                                      |
| ACD59253 | 0           | 0           | -0.43555354 | ISXo5 transposase                                                                                                      |
| ACD59391 | 0           | 0           | 0           | conserved hypothetical protein                                                                                         |
| ACD59445 | 0           | 0           | 0           | ISXo5 transposase                                                                                                      |
| ACD59449 | 0           | 0           | 0           | ISXoo13 transposase                                                                                                    |
| PXO_ma27 | 0           | 0           | 0           | XO_ma27 cDNA:pseudogene<br>chromosome:GCA_000019585.1:Chromosome:2937879:2937965:1<br>gene:PXO_ma27 transcript:PXO_ma2 |
| ACD59456 | 6.69047297  | 6.624473806 | 7.668643924 | transcriptional regulator                                                                                              |
| ACD59457 | 6.57218027  | 6.788542165 | 6.449520107 | methionine synthase                                                                                                    |
| ACD59458 | 7.095787315 | 6.702754495 | 6.609121103 | methionine synthase                                                                                                    |
| ACD59469 | 7.981881187 | 8.565787553 | 7.89624157  | transcriptional regulator GntR family                                                                                  |
| ACD59470 | 7.087473449 | 6.806955549 | 6.83406647  | ABC transporter ATP-binding protein                                                                                    |
| ACD59471 | 7.275593768 | 7.805937293 | 6.991691898 | membrane protein, putative                                                                                             |
| ACD59472 | 6.260735158 | 6.385110019 | 5.543338119 | conserved hypothetical protein                                                                                         |
| ACD59473 | 8.099731777 | 8.684643438 | 7.949686665 | conserved hypothetical protein                                                                                         |
| ACD59475 | 8.165911939 | 7.716648008 | 8.85055567  | conserved hypothetical protein                                                                                         |
| ACD59477 | 11.01586103 | 11.64760233 | 11.25655074 | glycine dehydrogenase                                                                                                  |
| ACD59479 | 4.795855244 | 4.327435876 | 5.318013084 | transposase, IS30 family                                                                                               |
| ACD59485 | 7.886452599 | 8.060885037 | 8.009839812 | adenylosuccinate lyase                                                                                                 |
| ACD59486 | 7.458283564 | 7.40721677  | 7.164544951 | conserved hypothetical protein                                                                                         |
| ACD59487 | 0           | 0           | 0           | hypothetical protein                                                                                                   |
| ACD59489 | 9.095518341 | 8.370739709 | 9.151145957 | hypothetical protein                                                                                                   |
| ACD59490 | 7.92633158  | 7.564332436 | 8.486074767 | transcription factor jumonji, JmjC                                                                                     |
| ACD59491 | 7.234338449 | 6.949184722 | 6.728573603 | acetyltransferase, gnat family                                                                                         |
| ACD59492 | 7.792783788 | 8.04930948  | 9.199137369 | 2-oxoglutarate dehydrogenase, E1 component                                                                             |
| ACD59493 | 8.228592651 | 8.372085838 | 9.002283398 | 2-oxoglutarate dehydrogenase, E2 component, dihydrolipoamide succinyltransferase                                       |
| ACD59494 | 7.380616907 | 7.479731769 | 7.112731405 | dihydrolipoamide dehydrogenase                                                                                         |
| ACD59495 | 6.750606505 | 6.510025129 | 6.966165106 | conserved hypothetical protein                                                                                         |
| ACD59496 | 6.919828685 | 6.896114394 | 5.976175725 | thymidylate synthase                                                                                                   |
| ACD59497 | 6.76016771  | 6.491829051 | 6.409854221 | ABC transporter, permease/ATP-binding protein                                                                          |
| ACD59498 | 7.142168339 | 6.628343463 | 6.557537223 | hydrogen peroxide-inducible genes activator                                                                            |
| ACD59500 | 6.240323871 | 6.133964173 | 5.741499346 | outer membrane component of multidrug efflux pump                                                                      |
| ACD59501 | 0           | 0           | 0           | ISXo8 transposase                                                                                                      |
| ACD59508 | 6.757023247 | 6.814088933 | 6.751731497 | DNA repair protein RecN                                                                                                |
| ACD59510 | 10.21170582 | 10.65761321 | 11.28922353 | outer membrane protein                                                                                                 |
| ACD59513 | 9.16768157  | 8.799767296 | 9.997588798 | SsrA-binding protein                                                                                                   |
| ACD59516 | 6.713943207 | 5.98287268  | 7.128169651 | lipoprotein, putative                                                                                                  |
| ACD59517 | 6.358531649 | 5.903978223 | 6.079941254 | acyl-CoA dehydrogenase                                                                                                 |
| ACD59518 | 8.32984566  | 8.616732615 | 9.385402994 | HNH endonuclease family protein                                                                                        |
| ACD59519 | 8.401587805 | 8.544983746 | 9.195556762 | 1-deoxy-D-xylulose-5-phosphate synthase                                                                                |
| ACD59525 | 0           | 3.721503907 | 0           | transposase, IS30 family                                                                                               |
| ACD59526 | 0           | 0           | 0           | conserved domain protein                                                                                               |
| ACD59528 | 0           | 0           | 0           | transposase                                                                                                            |
| ACD59529 | 1.829399028 | 4.783399029 | 3.286304546 | transposase                                                                                                            |
| ACD59537 | 6.553589362 | 6.839732889 | 6.119005422 | transcriptional regulator                                                                                              |
| ACD59538 | 6.836302884 | 6.775169093 | 6.916106369 | DNA topoisomerase IV, A subunit                                                                                        |
| ACD59540 | 7.334335864 | 7.263541514 | 7.103675972 | penicillin acylase II                                                                                                  |
| ACD59542 | 7.153987688 | 6.696160782 | 6.415246562 | TonB-dependent outer membrane Receptor                                                                                 |
| ACD59543 | 7.366409648 | 6.196634582 | 6.084225878 | hypothetical protein                                                                                                   |
| ACD59544 | 9.7748447   | 9.843486136 | 10.75409414 | conserved hypothetical protein                                                                                         |
| ACD59553 | 8.791638281 | 8.705445775 | 8.449895599 | protein U                                                                                                              |
| ACD59554 | 8.084845584 | 8.013562754 | 7.846436901 | pili assembly chaperone                                                                                                |
| ACD59555 | 6.92132921  | 7.27561239  | 6.932238378 | outer membrane usher protein FasD                                                                                      |
| ACD59556 | 6.628503866 | 7.67468662  | 7.218878016 | spore Coat Protein U domain family                                                                                     |



|          |             |             |              |                                                                       |
|----------|-------------|-------------|--------------|-----------------------------------------------------------------------|
| ACD59557 | 8.180853995 | 8.73047693  | 10.3261598   | conserved hypothetical protein                                        |
| ACD59558 | 7.354875259 | 7.28872768  | 8.451388346  | pili assembly chaperone                                               |
| ACD59559 | 9.026719846 | 8.808024589 | 9.28529355   | ribosomal protein S2                                                  |
| ACD59560 | 6.891321967 | 6.917813623 | 6.890227791  | translation elongation factor Ts                                      |
| ACD59561 | 9.536552238 | 9.668156363 | 9.136862981  | conserved hypothetical protein                                        |
| ACD59562 | 8.287453825 | 8.749678396 | 8.082596154  | uridylate kinase                                                      |
| ACD59563 | 9.075931007 | 8.994039404 | 10.04515898  | ribosome recycling factor                                             |
| ACD59564 | 7.351248455 | 7.70559092  | 6.289137289  | undecaprenyl diphosphate synthase                                     |
| ACD59565 | 8.26218413  | 8.469576701 | 8.192371729  | phosphatidate cytidylyltransferase                                    |
| ACD59566 | 7.691883072 | 7.752614804 | 7.389704467  | 1-deoxy-D-xylulose 5-phosphate reductoisomerase                       |
| ACD59567 | 7.917061725 | 8.128231527 | 7.112741829  | membrane-associated Zn-dependent protease                             |
| ACD59568 | 7.916727422 | 7.972876425 | 7.869748051  | outer membrane antigen                                                |
| ACD59570 | 6.950480079 | 7.217162846 | 6.525713417  | UDP-3-O-[3-hydroxymyristoyl] glucosamine N-acyltransferase            |
| ACD59571 | 7.487019996 | 7.27659902  | 7.343381171  | beta-hydroxyacyl-(acyl-carrier-protein) dehydratase FabZ              |
| ACD59572 | 7.259526726 | 7.265924413 | 6.709166545  | acyl-[acyl-carrier-protein]-UDP-N-acetylglucosamine O-acyltransferase |
| ACD59573 | 6.938438711 | 6.901132384 | 6.571869419  | lipid-A-disaccharide synthase                                         |
| ACD59574 | 7.314043903 | 7.450204997 | 6.999819652  | ribonuclease HII                                                      |
| ACD59575 | 7.26441445  | 7.179331897 | 6.755822279  | DNA polymerase III, alpha subunit subfamily, putative                 |
| ACD59576 | 7.95247918  | 8.553533303 | 7.675300793  | acetyl-CoA carboxylase, carboxyl transferase, alpha subunit           |
| ACD59578 | 7.220716892 | 7.410620946 | 9.323421863  | outer membrane receptor protein, mostly Fe transport                  |
| ACD59579 | 6.332783109 | 6.822946791 | 6.769507291  | ABC transporter ATP-binding protein                                   |
| ACD59580 | 7.163518859 | 7.082436487 | 7.45925127   | membrane protein, putative                                            |
| ACD59581 | 7.037876361 | 7.205656425 | 6.442573654  | conserved hypothetical protein                                        |
| ACD59582 | 6.172155446 | 6.826001812 | 6.806169364  | transposase                                                           |
| ACD59583 | 7.659938825 | 7.237936504 | 6.779942553  | hypothetical protein                                                  |
| ACD59585 | 7.023854133 | 7.650017748 | 7.564202852  | conserved hypothetical protein                                        |
| ACD59586 | 7.851986348 | 8.311512198 | 8.817421803  | PHB depolymerase                                                      |
| ACD59587 | 7.978001091 | 7.313635864 | 7.708152741  | conserved hypothetical protein                                        |
| ACD59588 | 0           | 0           | 0            | transposase                                                           |
| ACD59589 | 0           | 5.5987225   | 6.95575451   | transposase                                                           |
| ACD59591 | 4.990696241 | 5.298874557 | 4.694083427  | transposase                                                           |
| ACD59592 | 0           | 1.847872669 | -0.130003868 | ISXoo5 transposase                                                    |
| ACD59593 | 7.566175844 | 7.489647293 | 7.515944209  | conserved hypothetical protein                                        |
| ACD59597 | 7.626300409 | 7.468436694 | 7.46586838   | conserved hypothetical protein                                        |
| ACD59598 | 7.461487633 | 7.516157013 | 7.329204342  | conserved hypothetical integral membrane protein                      |
| ACD59600 | 7.12361447  | 6.451122074 | 6.525799534  | hypothetical protein                                                  |
| ACD59604 | 9.285101626 | 8.641444875 | 8.74130518   | glyoxylase I family protein                                           |
| ACD59605 | 9.106128431 | 9.669854136 | 8.865024893  | conserved hypothetical protein                                        |
| ACD59606 | 6.99304027  | 6.82315066  | 7.038523977  | methionyl-tRNA synthetase                                             |
| ACD59607 | 6.467111526 | 7.46479894  | 6.899381094  | phosphotransferase                                                    |
| ACD59608 | 6.512947422 | 5.754470663 | 6.979522372  | ferredoxin II                                                         |
| ACD59611 | 6.053309042 | 6.380852369 | 6.40959799   | conserved hypothetical protein                                        |
| ACD59612 | 8.189345228 | 8.180794335 | 9.261497907  | conserved hypothetical protein                                        |
| ACD59613 | 8.75217991  | 9.089482261 | 8.511301988  | RNA polymerase sigma factor                                           |
| ACD59614 | 8.349705846 | 8.788653088 | 7.755535234  | conserved hypothetical protein                                        |
| ACD59615 | 8.866558757 | 8.925815511 | 7.509711675  | delta 9 acyl-lipid fatty acid desaturase                              |
| ACD59616 | 8.000495841 | 7.759235745 | 6.691436456  | dehydrogenase                                                         |
| ACD59617 | 8.493687358 | 8.485740772 | 6.759395553  | conserved hypothetical protein                                        |
| ACD59618 | 8.369034553 | 8.350576805 | 7.279722     | cyclopropane-fatty-acyl-phospholipid synthase                         |
| ACD59619 | 8.147484786 | 8.279424864 | 6.928121561  | conserved hypothetical protein                                        |
| ACD59620 | 7.818831392 | 8.057493596 | 6.729212857  | membrane protein, putative                                            |
| ACD59621 | 7.505390789 | 7.836738391 | 6.5449119    | cyclopropane-fatty-acyl-phospholipid synthase                         |
| ACD59625 | 6.715055947 | 6.6794801   | 6.607103904  | oxacillin resistance-associated protein fmtc                          |
| ACD59632 | 7.913410049 | 8.363157933 | 9.887184053  | GTN Reductase                                                         |
| ACD59633 | 6.750405521 | 7.208614799 | 5.969647838  | conserved hypothetical protein                                        |
| ACD59635 | 7.208478242 | 7.420313963 | 7.147479698  | cation transport protein                                              |
| ACD59636 | 9.197042183 | 10.23149721 | 11.78141709  | hypothetical protein                                                  |
| ACD59638 | 8.441251068 | 8.63956501  | 9.689884438  | fkbp-type peptidyl-prolyl cis-trans isomerase slyd                    |
| ACD59639 | 7.718012213 | 7.45173863  | 7.233610091  | heat shock protein                                                    |
| ACD59640 | 11.46509189 | 12.06747134 | 11.77911195  | conserved hypothetical protein                                        |
| ACD59643 | 0           | 0.997776537 | -0.986336224 | ISXo8 transposase                                                     |
| ACD59646 | 8.299862808 | 9.023299715 | 8.787794843  | conserved hypothetical protein                                        |
| ACD59649 | 8.389343094 | 7.860466259 | 8.042972583  | protein of unknown function                                           |
| ACD59650 | 6.440819347 | 6.455797355 | 5.88468827   | leucine dehydrogenase                                                 |

|          |             |             |             |                                                        |
|----------|-------------|-------------|-------------|--------------------------------------------------------|
| ACD59652 | 8.222881824 | 8.654166987 | 10.36464903 | acetoacetyl-CoA thiolase                               |
| ACD59653 | 12.05829958 | 12.57563142 | 13.98384867 | outer membrane protein                                 |
| ACD59654 | 7.991476495 | 9.276296588 | 8.291359515 | conserved hypothetical protein                         |
| ACD59655 | 5.983928457 | 5.785179107 | 6.159590842 | Putative signal protein with CHASE3 and GGDEF domains  |
| ACD59656 | 8.551423731 | 9.405530811 | 7.925679048 | protein of unknown function                            |
| ACD59657 | 8.639470952 | 9.186574838 | 6.636106897 | conserved hypothetical protein                         |
| ACD59658 | 7.193249362 | 7.537940538 | 6.838863549 | mRNA 3'-end processing factor                          |
| ACD59659 | 6.302869188 | 6.960789695 | 7.043202311 | conserved hypothetical protein                         |
| ACD59660 | 6.812318519 | 6.529674171 | 6.408232921 | DNA ligase                                             |
| ACD59661 | 7.152548509 | 7.012635712 | 6.996750279 | ATP-dependent helicase                                 |
| ACD59662 | 6.521694653 | 6.863703102 | 7.290700855 | Ser/Thr protein phosphatase family protein             |
| ACD59671 | 0           | 0           | 0           | ISXo5 transposase                                      |
| ACD59675 | 10.31710731 | 10.43160207 | 8.462608605 | lipoprotein, putative                                  |
| ACD59676 | 9.226734896 | 9.451903439 | 8.796948107 | response regulator                                     |
| ACD59686 | 7.349595281 | 7.713414011 | 7.56553625  | fatty oxidation complex alpha subunit                  |
| ACD59694 | 6.94358147  | 7.534458526 | 6.58926313  | transcriptional regulator                              |
| ACD59695 | 6.544626026 | 6.521027174 | 5.902059104 | TonB-dependent receptor plug domain protein            |
| ACD59696 | 7.548559927 | 6.974644026 | 7.673302008 | TonB-dependent receptor                                |
| ACD59697 | 7.019279362 | 6.55210036  | 5.946539049 | beta-galactosidase                                     |
| ACD59698 | 10.64357664 | 9.621526275 | 0           | hypothetical protein                                   |
| ACD59701 | 9.004526673 | 8.664045443 | 9.44240031  | hypothetical protein                                   |
| ACD59703 | 9.051461832 | 9.576833877 | 7.529524258 | DNA polymerase III alpha subunit                       |
| ACD59704 | 9.240657787 | 9.692979834 | 8.8175689   | major facilitator superfamily protein                  |
| ACD59708 | 6.75919579  | 6.386169453 | 6.550380487 | Ycel like family                                       |
| ACD59709 | 8.177105549 | 7.860484882 | 7.410646383 | cytochrome B561                                        |
| ACD59710 | 9.060971476 | 9.700526416 | 9.281253134 | Ycel like family                                       |
| ACD59711 | 6.651898398 | 6.225941976 | 6.516905522 | cold shock domain protein                              |
| ACD59713 | 7.81622849  | 7.402543125 | 7.311167034 | L-serine ammonia-lyase                                 |
| ACD59717 | 6.903255237 | 6.920972084 | 7.571494793 | peptidase                                              |
| ACD59718 | 7.30874857  | 7.461127428 | 7.05318738  | peptide chain release factor 3                         |
| ACD59719 | 6.74970856  | 7.371358474 | 6.115241373 | hemolysin III                                          |
| ACD59720 | 8.761674222 | 8.206765306 | 8.679687692 | AsmA family membrane protein                           |
| ACD59721 | 6.367516097 | 6.258336127 | 5.894405506 | AsmA family membrane protein                           |
| ACD59722 | 10.30210195 | 9.551815907 | 10.20936807 | isrs05-transposase protein                             |
| ACD59724 | 11.66826453 | 10.59382993 | 7.906902618 | AsmA family membrane protein                           |
| ACD59728 | 9.431821417 | 9.590280141 | 10.10272374 | chaperonin HslO                                        |
| ACD59729 | 8.356020528 | 8.769196503 | 9.238232752 | conserved hypothetical protein                         |
| ACD59730 | 9.258149064 | 9.217940739 | 9.573768354 | TonB-dependent outer membrane Receptor                 |
| ACD59732 | 7.575387973 | 7.711818375 | 8.401587805 | hydrolase, alpha/beta fold family, putative            |
| ACD59733 | 7.735799696 | 7.792041916 | 8.412684157 | acyl-coenzyme A dehydrogenase                          |
| ACD59736 | 7.462371391 | 7.920906601 | 8.29245048  | beta-lactamase                                         |
| AGS47850 | 5.76147145  | 5.680917855 | 7.271827157 | ribonuclease HIII fragment                             |
| ACD59738 | 7.056789427 | 7.822762009 | 6.687256693 | IS1389 transposase                                     |
| ACD59747 | 6.921591047 | 6.840777924 | 6.810584487 | adenosylmethionine-8-amino-7-oxononanoate transaminase |
| ACD59748 | 6.806427177 | 6.893143751 | 6.155741139 | conserved hypothetical protein                         |
| ACD59750 | 10.46715719 | 10.42641153 | 8.974291253 | TonB-dependent receptor                                |
| ACD59751 | 7.676500146 | 7.794961648 | 6.052265895 | alpha-L-fucosidase                                     |
| ACD59752 | 7.783378074 | 8.165339168 | 5.968848774 | glycosyl hydrolase, family 18                          |
| ACD59753 | 6.687662619 | 6.718087584 | 6.129179964 | beta-hexosaminidase                                    |
| ACD59754 | 6.820638509 | 6.528991627 | 5.931021119 | beta-mannosidase                                       |
| ACD59755 | 6.446408433 | 6.137796541 | 5.647685786 | glucan 1,4-beta-glucosidase                            |
| ACD59759 | 0           | 0           | 0           | hypothetical protein                                   |
| ACD59765 | 7.805176354 | 8.108796243 | 6.555566177 | conserved hypothetical protein                         |
| AGS47851 | 7.4134333   | 7.20513833  | 6.102500669 | antigen                                                |
| ACD59766 | 6.892548888 | 7.019924261 | 6.02888294  | beta-galactosidase                                     |
| ACD59768 | 9.218391289 | 9.869735715 | 10.67108988 | conserved hypothetical protein                         |
| ACD59770 | 6.365164096 | 6.053411143 | 6.277049295 | BNR/Asp-box repeat domain protein                      |
| ACD59771 | 7.794994128 | 7.658390023 | 8.322459991 | leucin rich protein                                    |
| ACD59775 | 6.053148272 | 5.857279376 | 5.967553675 | von Willebrand factor type A domain protein            |
| ACD59776 | 7.486722417 | 6.677818284 | 6.22342255  | conserved hypothetical protein                         |
| ACD59777 | 7.749648231 | 7.325386415 | 7.665939875 | hypothetical protein                                   |
| ACD59778 | 10.97066675 | 0           | 8.687134193 | translation initiation factor IF-2                     |
| ACD59779 | 2.015490433 | 0.995441102 | 1.607394235 | ISXo8 transposase                                      |
| ACD59784 | 9.383797158 | 11.34508917 | 10.14113642 | hypothetical protein                                   |

|           |             |             |             |                                                                                                                           |
|-----------|-------------|-------------|-------------|---------------------------------------------------------------------------------------------------------------------------|
| ACD59789  | 6.856027059 | 7.110217062 | 6.779088962 | glutathione synthase                                                                                                      |
| ACD59790  | 6.380772731 | 7.25296813  | 6.512266399 | TonB protein                                                                                                              |
| ACD59796  | 7.112157978 | 7.321053196 | 6.580153024 | glycosyltransferase                                                                                                       |
| ACD59799  | 9.716003161 | 9.678976828 | 9.799995506 | coenzyme PQQ biosynthesis protein B                                                                                       |
| ACD59800  | 9.228746554 | 9.002455    | 9.5465839   | coenzyme PQQ biosynthesis protein C                                                                                       |
| ACD59801  | 8.238108526 | 7.828510997 | 8.192243491 | bifunctional coenzyme PQQ synthesis protein C/D (Pyrroloquinolinequinone biosynthesis protein C/D)                        |
| ACD59802  | 7.508254327 | 7.08664579  | 6.572595644 | coenzyme PQQ biosynthesis protein E                                                                                       |
| ACD59803  | 7.491965302 | 7.733896605 | 7.030589896 | conserved hypothetical protein                                                                                            |
| ACD59804  | 6.970186438 | 6.720716243 | 6.833522636 | PhoPQ-regulated protein                                                                                                   |
| ACD59805  | 10.41872757 | 0           | 8.196956149 | hypothetical protein                                                                                                      |
| ACD59806  | 7.580039932 | 6.675293735 | 6.658568541 | glucose kinase                                                                                                            |
| ACD59808  | 7.561150448 | 7.465109241 | 7.266046267 | glucose kinase                                                                                                            |
| ACD59809  | 8.587312479 | 8.344122774 | 7.866561848 | glucose kinase                                                                                                            |
| ACD59810  | 7.376420628 | 6.798141264 | 6.814319697 | TonB-dependent receptor                                                                                                   |
| ACD59812  | 9.880434525 | 10.16839634 | 10.7221586  | DNA-binding related protein                                                                                               |
| ACD59813  | 6.791241046 | 6.868945989 | 6.722575315 | ATP-dependent DNA helicase RecQ                                                                                           |
| ACD59814  | 9.618082615 | 10.35547223 | 9.853181657 | hypothetical protein                                                                                                      |
| ACD59815  | 9.303977051 | 9.620179495 | 10.00229465 | conserved hypothetical protein                                                                                            |
| ACD59816  | 8.604227034 | 9.270157475 | 9.256859701 | response regulator                                                                                                        |
| ACD59818  | 7.475717221 | 7.102763097 | 7.638696553 | transposase                                                                                                               |
| ACD59838  | 7.103896235 | 7.04187814  | 7.667019263 | conserved hypothetical protein                                                                                            |
| ACD59841  | 9.466561868 | 7.743784223 | 9.331723128 | hypothetical protein                                                                                                      |
| ACD59842  | 7.702650618 | 7.573616894 | 7.121025765 | transmembrane transport protein                                                                                           |
| ACD59843  | 6.960720204 | 6.452173687 | 7.365036331 | Non-hemolytic phospholipase C                                                                                             |
| ACD59844  | 6.908644808 | 7.494983552 | 8.169388901 | Non-hemolytic phospholipase C                                                                                             |
| ACD59845  | 6.709593923 | 6.569358932 | 5.871604658 | phospholipase C                                                                                                           |
| ACD59848  | 7.363258702 | 7.101692092 | 7.320168738 | ISXoo3 transposase ORF A                                                                                                  |
| ACD59849  | 0           | 0           | 0           | transposase                                                                                                               |
| ACD59850  | 6.527553635 | 6.672609203 | 6.155237189 | DNA repair protein RadA                                                                                                   |
| ACD59853  | 7.269538151 | 6.74359575  | 6.841356773 | DNA mismatch repair protein MutS                                                                                          |
| ACD59854  | 0           | 0           | 0           | conserved hypothetical protein                                                                                            |
| ACD59855  | 6.62892812  | 6.324925784 | 6.793804866 | conserved hypothetical protein                                                                                            |
| ACD59857  | 0           | 0           | 0           | ISXoo11 transposase                                                                                                       |
| ACD59858  | 0           | 0           | 0           | conserved hypothetical protein                                                                                            |
| ACD59859  | 5.192935842 | 4.879852773 | 5.251075227 | Rhs element Vgr protein                                                                                                   |
| ACD59861  | 6.344288805 | 5.738916421 | 6.632724803 | conserved hypothetical protein                                                                                            |
| ACD59863  | 7.57145687  | 7.266739699 | 7.940624863 | conserved hypothetical protein                                                                                            |
| ACD59866  | 10.17040081 | 9.922759805 | 10.96097933 | transcriptional coactivator/pterin dehydratase                                                                            |
| ACD59867  | 7.456477629 | 6.710544728 | 6.919471187 | TonB protein                                                                                                              |
| ACD59868  | 8.582699001 | 7.485475131 | 8.759165823 | zinc transporter ZupT                                                                                                     |
| ACD59869  | 6.169299698 | 5.726675934 | 6.765799923 | zinc transporter ZupT                                                                                                     |
| ACD59870  | 8.002455    | 8.454286954 | 10.95541743 | conserved hypothetical protein                                                                                            |
| ACD59872  | 7.592315003 | 7.477653045 | 7.536037354 | ribonuclease E                                                                                                            |
| ACD59878  | 7.639514364 | 6.968182934 | 6.813268142 | fkbp-type peptidyl-prolyl cis-trans isomerase                                                                             |
| ACD59879  | 6.655409077 | 6.696494662 | 5.885222921 | pyridine nucleotide-disulfide oxidoreductase                                                                              |
| PXO_rna29 | 0           | 0           | 0           | XO_rna29 cDNA:pseudogene<br>chromosome:GCA_000019585.1:Chromosome:3409594:3409677:1<br>gene:PXO_rna29 transcript:PXO_rna2 |
| ACD59883  | 7.354522686 | 6.919447351 | 6.272245326 | phosphopantetheinyl transferase                                                                                           |
| ACD59886  | 5.27003924  | 5.738021981 | 5.755995814 | isrso17-ISXo8 transposase protein                                                                                         |
| ACD59888  | 0           | 0           | 0           | ISXo8 transposase                                                                                                         |
| ACD59890  | 8.154934532 | 8.026324246 | 7.390125954 | ISXoo6 transposase                                                                                                        |
| ACD59892  | 0           | 0           | 0           | ISXo8 transposase                                                                                                         |
| ACD59896  | 0           | 4.654716216 | 1.229403344 | ISXo2 putative transposase                                                                                                |
| ACD59902  | 6.647242546 | 6.625079033 | 6.168102448 | siroheme synthase                                                                                                         |
| ACD59903  | 7.897077024 | 7.771872377 | 7.49255023  | FAD containing monooxygenase                                                                                              |
| ACD59904  | 8.56708145  | 8.077381877 | 7.850586923 | FAD containing monooxygenase                                                                                              |
| ACD59905  | 6.181082668 | 6.87296416  | 7.130755875 | short chain dehydrogenase                                                                                                 |
| ACD59913  | 7.744706041 | 7.274112538 | 6.619807673 | conserved hypothetical protein                                                                                            |
| ACD59914  | 8.014505938 | 8.141008659 | 7.708518345 | hypothetical protein                                                                                                      |
| ACD59916  | 0           | 0           | 0           | ISXo5 transposase                                                                                                         |
| ACD59917  | 10.76957341 | 8.67116597  | 10.43642006 | putative lipoprotein                                                                                                      |
| ACD59921  | 8.701302996 | 9.042895999 | 7.496973581 | hypothetical protein                                                                                                      |
| ACD59929  | 0           | 0           | 0           | hypothetical protein                                                                                                      |

|          |             |             |             |                                                   |
|----------|-------------|-------------|-------------|---------------------------------------------------|
| ACD59930 | 0           | 0           | 0           | hypothetical protein                              |
| ACD59932 | 8.955655719 | 8.176322773 | 9.97272137  | hypothetical protein                              |
| ACD59933 | 9.942713888 | 9.394824931 | 9.638995144 | hypothetical protein                              |
| ACD59934 | 7.070163889 | 7.004849664 | 8.191375117 | peptidase                                         |
| ACD59947 | 0           | 7.862562974 | 10.96275144 | hypothetical protein                              |
| ACD59948 | 7.130920577 | 6.831167877 | 7.559629468 | transcriptional regulator                         |
| ACD59950 | 7.862284001 | 8.028519426 | 6.895641925 | signal recognition particle-docking protein FtsY  |
| ACD59951 | 6.632426729 | 6.408971645 | 6.104707771 | A/G-specific adenine glycosylase                  |
| ACD59952 | 9.027115338 | 8.946102117 | 8.977460249 | Fe(II) trafficking protein YggX                   |
| ACD59953 | 6.81271641  | 7.389231222 | 7.678755051 | hypothetical protein                              |
| ACD59956 | 10.84740975 | 11.07864452 | 9.534374869 | hypothetical protein                              |
| ACD59957 | 10.56891565 | 10.87011038 | 10.91293423 | conserved hypothetical protein                    |
| ACD59958 | 6.971899873 | 7.116011193 | 6.565559097 | transposase                                       |
| ACD59959 | 8.020929951 | 7.473592115 | 5.979997872 | conserved hypothetical protein                    |
| ACD59960 | 0           | 9.9261403   | 8.83810087  | conserved hypothetical protein                    |
| ACD59962 | 11.4415644  | 11.26360372 | 11.83095484 | hypothetical protein                              |
| ACD59965 | 9.224250144 | 9.04089517  | 9.59411369  | hypothetical protein                              |
| ACD59968 | 7.896744111 | 7.59273359  | 8.526647902 | conserved hypothetical protein                    |
| ACD59969 | 8.184389405 | 8.120673342 | 8.651937851 | hypothetical protein                              |
| ACD59972 | 9.929854599 | 7.80886767  | 10.34027295 | hypothetical protein                              |
| ACD59985 | 10.01934053 | 9.712121132 | 8.274042631 | hypothetical protein                              |
| ACD59997 | 8.119589621 | 10.6123525  | 8.500718414 | transcriptional regulator, LacI family            |
| ACD59999 | 9.116336163 | 6.696021643 | 7.238156307 | conserved domain protein                          |
| ACD60000 | 10.43372105 | 9.557992051 | 9.453764482 | transposase                                       |
| ACD60001 | 7.842111446 | 7.90542311  | 6.999312302 | transposase                                       |
| ACD60006 | 9.261389773 | 8.065976139 | 9.388019439 | fimbrial biogenesis protein                       |
| ACD60012 | 0           | 0           | 0           | conserved hypothetical protein                    |
| ACD60017 | 5.787004022 | 5.522667835 | 5.667968742 | phage capsid scaffolding protein (GPO)            |
| ACD60018 | 6.55527627  | 5.660275488 | 6.255959528 | phage major capsid protein, P2 family             |
| ACD60019 | 5.5127926   | 5.6178891   | 5.822623089 | phage-related terminase                           |
| ACD60020 | 7.110029093 | 7.125702755 | 7.610264507 | phage head completion protein (GPL)               |
| ACD60021 | 8.737801664 | 8.024773996 | 8.035898787 | phage Tail Protein X                              |
| ACD60022 | 7.258773296 | 7.447951062 | 7.226961228 | phage-related protein                             |
| ACD60023 | 0           | 0           | 0           | phage-related protein                             |
| ACD60024 | 6.939520448 | 6.38777093  | 5.497663456 | phage-related lytic enzyme                        |
| ACD60025 | 8.381006437 | 7.685267407 | 8.165575338 | lipoprotein, putative                             |
| ACD60026 | 7.16103108  | 6.707883653 | 6.554381641 | P2 phage tail completion protein R (GpR)          |
| ACD60027 | 7.356064558 | 6.878026382 | 7.899598611 | phage virion morphogenesis protein                |
| ACD60028 | 8.872822605 | 9.405205298 | 9.424844427 | conserved hypothetical protein                    |
| ACD60029 | 7.305031151 | 6.457495798 | 7.378702352 | phage-related baseplate assembly protein          |
| ACD60030 | 7.185787274 | 6.99354983  | 7.797441052 | phage tail protein I                              |
| ACD60031 | 7.042688108 | 6.483356298 | 6.279764708 | phage-related protein                             |
| ACD60032 | 7.931275292 | 7.806491623 | 8.332143991 | probable tail fiber assembly protein, putative    |
| ACD60033 | 6.853122383 | 5.455593539 | 6.189510294 | phage-related baseplate protein                   |
| ACD60034 | 7.773805166 | 7.461757728 | 8.768875726 | phage-related baseplate protein                   |
| ACD60035 | 5.187898363 | 4.507306261 | 5.480924268 | phage tail sheath protein                         |
| ACD60036 | 8.158200677 | 7.578048072 | 8.574911358 | phage major tail tube protein                     |
| ACD60037 | 0           | 0           | 0           | phage tail protein E                              |
| ACD60038 | 0           | 0           | 9.031659854 | phage tail protein, P2 GpE family                 |
| ACD60039 | 4.905952539 | 4.21130818  | 5.355696421 | phage-related tail protein                        |
| ACD60040 | 0           | 0           | 0           | gpU                                               |
| ACD60041 | 0           | 0           | 0           | bacteriophage P2 gpD protein                      |
| ACD60044 | 0           | 0           | 0           | hypothetical protein                              |
| ACD60045 | 0           | 0           | 0           | N-acetylglucosamine-6-phosphate deacetylase       |
| ACD60046 | 0           | 0           | 0           | conserved hypothetical protein                    |
| ACD60047 | 0           | 0           | 0           | phage-related protein                             |
| ACD60048 | 0           | 0           | 0           | hypothetical protein                              |
| ACD60049 | 0           | 0           | 0           | conserved hypothetical protein                    |
| ACD60050 | 0           | 0           | 0           | conserved hypothetical protein                    |
| ACD60051 | 0           | 0           | 0           | conserved hypothetical protein                    |
| ACD60052 | 0           | 0           | 0           | conserved hypothetical protein                    |
| ACD60053 | 0           | 0           | 0           | conserved hypothetical protein                    |
| ACD60054 | 0           | 0           | 0           | conserved hypothetical protein                    |
| ACD60055 | 0           | 0           | 0           | site-specific recombinase, phage integrase family |

|          |             |             |             |                                                                                              |
|----------|-------------|-------------|-------------|----------------------------------------------------------------------------------------------|
| ACD60067 | 7.942344422 | 7.938891493 | 7.441915002 | superoxide dismutase                                                                         |
| ACD60070 | 8.481214164 | 8.53485145  | 8.451709786 | conserved hypothetical protein                                                               |
| ACD60071 | 6.846919492 | 6.716812604 | 6.001914808 | nicotinate-nucleotide pyrophosphorylase                                                      |
| ACD60072 | 6.79956657  | 6.586856297 | 5.925588856 | conserved hypothetical protein                                                               |
| ACD60096 | 7.020079883 | 7.227789201 | 7.476462699 | dehydrogenase                                                                                |
| ACD60106 | 9.306373898 | 10.57942909 | 10.88193222 | hypothetical protein                                                                         |
| ACD60112 | 6.356907926 | 6.616897254 | 6.968413363 | transcriptional regulator                                                                    |
| ACD60118 | 5.342512078 | 6.936732153 | 6.966049716 | 2-ketoacid dehydrogenase\x3b malate dehydrogenase\x3b lactate dehydrogenase                  |
| ACD60123 | 8.02683325  | 8.218384023 | 8.335131272 | SCO1/SenC superfamily                                                                        |
| ACD60124 | 6.677592806 | 6.680042993 | 6.238857541 | phosphatidylserine decarboxylase                                                             |
| ACD60126 | 10.17785552 | 10.11441908 | 9.561045407 | cath1                                                                                        |
| ACD60127 | 5.379343707 | 7.098337439 | 6.442484082 | conserved hypothetical protein                                                               |
| ACD60130 | 6.623291858 | 6.620196361 | 5.962678573 | transcription elongation factor GreB                                                         |
| ACD60132 | 8.36744533  | 8.164228147 | 7.279201972 | carboxymethylenebutenolidase                                                                 |
| ACD60133 | 8.052932075 | 8.053877022 | 6.926888964 | diadenosine tetraphosphate hydrolase and other HIT family hydrolase                          |
| ACD60134 | 12.13055769 | 12.92810009 | 12.59213931 | conserved hypothetical protein                                                               |
| ACD60135 | 9.953028011 | 10.0259147  | 9.807483728 | conserved hypothetical protein                                                               |
| ACD60139 | 6.16256857  | 6.344056179 | 6.522766686 | metallopeptidase                                                                             |
| ACD60149 | 9.060398717 | 9.071250501 | 9.967255084 | lipoprotein                                                                                  |
| ACD60150 | 8.593518112 | 9.143196965 | 6.52166482  | outer membrane lipoprotein                                                                   |
| ACD60151 | 9.009419959 | 9.011825458 | 8.9203201   | hypothetical protein                                                                         |
| ACD60156 | 8.170766328 | 8.386910077 | 8.699551633 | alkaline phosphatase, placental type                                                         |
| ACD60157 | 6.701341121 | 6.592918925 | 6.234957264 | tRNA(Ile)-lysine synthase (tRNA(Ile)-lysinesynthetase) (tRNA(Ile)-2-lysyl-cytidine synthase) |
| ACD60158 | 7.871313873 | 7.768257119 | 8.366247892 | exodeoxyribonuclease VII, small subunit                                                      |
| ACD60159 | 7.066229147 | 7.143179105 | 5.650956944 | polyprenyl synthetase .gene\x3a ispa or                                                      |
| ACD60160 | 12.21770632 | 11.32849542 | 11.55747806 | hypothetical protein                                                                         |
| ACD60161 | 7.567385727 | 6.91353571  | 7.151706634 | extracellular protease                                                                       |
| ACD60165 | 8.828260274 | 8.997532348 | 9.560292706 | conserved hypothetical protein                                                               |
| ACD60168 | 7.939849511 | 6.960592795 | 8.320814085 | conserved hypothetical protein                                                               |
| ACD60172 | 7.007677665 | 7.662191255 | 8.354434529 | outer membrane protein                                                                       |
| ACD60173 | 3.573507834 | 3.203991994 | 2.695486109 | ISXo3 transposase ORF B                                                                      |
| ACD60174 | 7.447562667 | 6.939861262 | 10.18856412 | TonB-dependent Receptor/Oar-like                                                             |
| ACD60175 | 7.989593185 | 7.990722332 | 8.556122818 | TonB family C-terminal domain protein                                                        |
| ACD60177 | 10.24987194 | 10.32996447 | 11.04185077 | conserved hypothetical protein                                                               |
| ACD60185 | 6.918386234 | 6.756089247 | 6.901277224 | thioredoxin                                                                                  |
| ACD60186 | 7.792133043 | 7.480628659 | 7.270827916 | lipoprotein, putative                                                                        |
| ACD60191 | 9.181964709 | 8.293195729 | 7.925061837 | conserved hypothetical protein                                                               |
| ACD60192 | 7.112637587 | 6.932781677 | 6.359691588 | peptidyl-prolyl cis-trans isomerase                                                          |
| ACD60200 | 6.640752502 | 6.201179027 | 5.788724857 | glycogen debranching enzyme GlgX                                                             |
| ACD60202 | 0           | 0           | 0           | ISXo5 transposase                                                                            |
| ACD60203 | 8.854572336 | 10.64591957 | 11.51672434 | transposase                                                                                  |
| ACD60211 | 6.412727339 | 5.670021678 | 4.977467691 | transposase                                                                                  |
| ACD60213 | 7.186866969 | 6.44458425  | 6.629366821 | conserved hypothetical protein                                                               |
| ACD60214 | 7.551016063 | 5.937391477 | 6.007785289 | transposase                                                                                  |
| ACD60215 | 5.702139432 | 6.157508629 | 5.647855563 | transposase                                                                                  |
| ACD60217 | 10.12921861 | 10.42194909 | 9.880711541 | thiamine biosynthesis protein ThiS                                                           |
| ACD60218 | 8.159386994 | 8.448599532 | 8.82314429  | thiazole biosynthesis protein ThiG                                                           |
| ACD60219 | 7.192243491 | 6.860404179 | 6.235893603 | tRNA (guanine-N(7))-methyltransferase                                                        |
| ACD60220 | 7.090916928 | 7.155941455 | 6.298366888 | sulfur deprivation response regulator                                                        |
| ACD60222 | 11.48500913 | 11.99776166 | 9.564578233 | conserved hypothetical protein                                                               |
| ACD60223 | 4.754834068 | 5.312015263 | 5.44290038  | putative ISXoo4 transposase                                                                  |
| ACD60226 | 7.285254243 | 7.45852145  | 7.733998257 | fumarylacetoacetate hydrolase                                                                |
| ACD60227 | 8.650689177 | 9.556427499 | 8.810732282 | large conductance mechanosensitive channel protein                                           |
| ACD60230 | 10.87121221 | 0           | 10.36385003 | hypothetical protein                                                                         |
| ACD60231 | 5.649678683 | 5.624606861 | 5.798662312 | putative transposase                                                                         |
| ACD60238 | 7.62118008  | 6.247564896 | 6.455828583 | conserved hypothetical protein                                                               |
| ACD60246 | 6.26387761  | 6.551186836 | 5.517124486 | sulfite reductase [NADPH] flavoprotein, alpha-component                                      |
| ACD60247 | 6.934245204 | 6.731427653 | 5.804502782 | sulfite reductase (NADPH) hemoprotein, beta-component                                        |
| ACD60248 | 7.734465764 | 8.045006042 | 6.751396769 | phosphoadenosine phosphosulfate reductase                                                    |
| ACD60252 | 7.430134706 | 7.594205152 | 7.251368789 | sensor histidine kinase                                                                      |
| ACD60255 | 6.9721412   | 7.017120188 | 6.661564349 | siroheme synthase                                                                            |
| ACD60256 | 7.330459803 | 7.187935962 | 7.06714391  | cysteine synthase A                                                                          |
| ACD60257 | 12.49080325 | 12.63613065 | 11.57750908 | conserved hypothetical protein                                                               |

|          |             |             |             |                                                     |
|----------|-------------|-------------|-------------|-----------------------------------------------------|
| ACD60258 | 14.10542567 | 14.2045253  | 13.20241925 | hypothetical protein                                |
| ACD60259 | 7.632457266 | 8.58866592  | 8.768869111 | appr-1-p processing                                 |
| ACD60266 | 8.908650812 | 9.333689831 | 8.327974725 | hypothetical protein                                |
| ACD60268 | 9.02471306  | 9.930774291 | 9.413071475 | morphine 6-dehydrogenase (Naloxone reductase)       |
| ACD60269 | 9.512294057 | 9.47623383  | 7.869279207 | catalase                                            |
| ACD60270 | 6.883510851 | 6.771238544 | 5.940317121 | conserved hypothetical protein                      |
| ACD60274 | 9.743080689 | 10.36584124 | 11.15814891 | hypothetical protein                                |
| ACD60277 | 6.549815466 | 7.003725904 | 6.91858898  | transposase                                         |
| ACD60280 | 7.827641217 | 5.259600164 | 6.219213059 | hypothetical protein                                |
| ACD60282 | 7.269846678 | 6.714204297 | 8.639630123 | lipoprotein, putative                               |
| ACD60283 | 7.13137341  | 6.363395385 | 7.05940936  | endoproteinase Arg-C                                |
| ACD60286 | 10.38743578 | 7.891279431 | 8.340059268 | hypothetical protein                                |
| ACD60290 | 9.589042484 | 9.188598736 | 9.219529149 | putative addiction module antidote                  |
| ACD60291 | 9.252407616 | 8.364594318 | 9.432942709 | death-on-curing protein                             |
| ACD60295 | 7.966799585 | 7.82156354  | 6.544496205 | transcriptional regulator uid family                |
| ACD60299 | 6.647760605 | 5.743531125 | 6.460013498 | serine/threonine kinase                             |
| ACD60310 | 7.050469047 | 6.907094963 | 6.695743323 | type I restriction enzyme EcoKI R protein           |
| ACD60311 | 7.709063129 | 7.260759617 | 7.834641698 | abortive infection bacteriophage resistance protein |
| ACD60312 | 7.506129031 | 7.101219338 | 7.929489221 | type I restriction enzyme EcoKI M protein           |
| ACD60313 | 0           | 0           | 0           | type I restriction-modification system, S subunit   |
| ACD60316 | 7.05382816  | 7.319464394 | 7.238309193 | Rhs element Vgr protein                             |
| ACD60334 | 9.308614345 | 9.859390354 | 8.008041984 | lipoprotein, putative                               |
| ACD60335 | 8.754122537 | 8.782765656 | 7.840683524 | conserved hypothetical protein                      |
| ACD60336 | 9.092413601 | 9.358583075 | 9.016301306 | conserved hypothetical protein                      |
| ACD60337 | 6.588594718 | 6.894175075 | 5.945146488 | Rhs element Vgr protein                             |
| ACD60338 | 0           | 0           | 0           | EF hand domain protein                              |
| ACD60339 | 6.355331714 | 6.073770972 | 6.607916151 | Rhs element Vgr protein                             |
| ACD60340 | 0           | 0           | 0           | conserved hypothetical protein                      |
| ACD60341 | 3.509151087 | 4.759464797 | 3.526707363 | Rhs element Vgr protein                             |
| ACD60351 | 7.5538059   | 7.428619793 | 6.976890572 | carbon starvation protein A                         |
| ACD60352 | 9.298754529 | 8.573764567 | 8.908482693 | conserved domain protein                            |
| ACD60357 | 7.270024285 | 6.980665137 | 7.067316036 | Putative signal protein with GGDEF domain           |
| ACD60359 | 7.325791144 | 7.455524498 | 7.069197324 | polyprenyl synthetase , gene\x3a ispb or            |
| ACD60366 | 8.702650618 | 9.111018267 | 10.4639943  | phenazine biosynthesis PhzF family protein          |
| ACD60373 | 11.12707865 | 11.10917117 | 9.042272235 | conserved hypothetical protein                      |
| ACD60374 | 11.48649316 | 10.87511194 | 10.69696753 | hypothetical protein                                |
| ACD60375 | 7.510938191 | 7.385663989 | 6.928382168 | DNA-3-methyladenine glycosylase I                   |
| ACD60376 | 10.19288457 | 9.823238252 | 10.08679969 | conserved hypothetical protein                      |
| ACD60380 | 6.486510052 | 6.352984458 | 5.869691305 | conserved hypothetical protein                      |
| ACD60381 | 6.574457293 | 6.745223884 | 5.775232316 | pyrroline-5-carboxylate reductase                   |
| ACD60382 | 0           | 2.880848101 | 2.188926251 | isrso17-transposase protein                         |
| ACD60383 | 4.894900201 | 4.541694484 | 3.105646234 | ISXo8 transposase                                   |
| ACD60384 | 9.937250218 | 11.16795122 | 10.6381191  | bacterial DNA-binding protein                       |
| ACD60385 | 7.415657274 | 7.584970015 | 7.53239489  | peptidase                                           |
| ACD60386 | 8.939229517 | 9.102335315 | 9.383388938 | conserved hypothetical protein                      |
| ACD60387 | 9.608077362 | 10.16255498 | 9.428944252 | conserved hypothetical protein                      |
| ACD60388 | 8.572404647 | 8.977737849 | 9.730188194 | conserved hypothetical protein                      |
| ACD60392 | 8.543426283 | 8.903716182 | 7.45479279  | Rrf2 family protein                                 |
| ACD60393 | 8.047941844 | 8.088290032 | 7.884683386 | FeS assembly protein SufB                           |
| ACD60394 | 8.076238404 | 7.96953618  | 7.605531373 | FeS assembly ATPase SufC                            |
| ACD60395 | 7.34394962  | 7.252665432 | 6.254697964 | FeS assembly protein SufD                           |
| ACD60396 | 7.601629668 | 7.420970763 | 6.733001759 | cysteine desulfurase                                |
| ACD60397 | 7.781149852 | 7.679043706 | 7.205822567 | acetyltransferase                                   |
| ACD60398 | 7.100105125 | 6.937238446 | 6.124069601 | benzene 1,2-dioxygenase ferredoxin protein          |
| ACD60400 | 6.179769789 | 4.815027142 | 5.518277042 | ISXo8 transposase                                   |
| ACD60401 | 0           | 0           | 0           | IS66 family element, Orf1 protein                   |
| ACD60402 | 6.768488715 | 6.58697786  | 6.553911854 | transposase                                         |
| ACD60404 | 0           | 0           | 5.077409651 | conserved domain protein                            |
| ACD60405 | 0           | 0           | 0           | ISXo2 putative transposase                          |
| ACD60406 | 10.41357504 | 10.67259329 | 8.138814469 | putative serine-pyruvate aminotransferase           |
| ACD60407 | 9.761266987 | 10.0197575  | 7.640779972 | O-acetylhomoserine sulfhydrylase , gene\x3a MetY    |
| ACD60408 | 8.426575069 | 8.651105522 | 7.549053029 | glutamine synthetase family protein                 |
| ACD60411 | 6.416404031 | 6.29304303  | 6.3565893   | transposase                                         |
| ACD60413 | 6.035161997 | 5.836578089 | 5.822806614 | transposase                                         |

|          |             |             |              |                                                                  |
|----------|-------------|-------------|--------------|------------------------------------------------------------------|
| ACD60414 | 0           | 0           | 1.921497267  | transposase (IS4 family)                                         |
| ACD60420 | 7.381672723 | 7.979676698 | 9.350232021  | HrpG                                                             |
| ACD60424 | 10.49877941 | 0           | 10.82954833  | hypothetical protein                                             |
| ACD60425 | 8.51101333  | 8.169779723 | 8.602019572  | transcriptional regulator, LysR family                           |
| ACD60428 | 6.655695287 | 6.403715938 | 6.719073892  | TonB-dependent outer membrane receptor                           |
| ACD60429 | 7.438084884 | 7.423107504 | 7.930867411  | glyoxalase family protein                                        |
| ACD60430 | 7.000067625 | 6.815959618 | 6.045379624  | TonB-dependent outer membrane receptor                           |
| ACD60431 | 7.709662843 | 7.650994269 | 8.298534604  | TonB-dependent outer membrane Receptor                           |
| ACD60433 | 8.187005587 | 7.925417952 | 8.205583121  | cation/x3aproton antiporter                                      |
| ACD60435 | 6.376948435 | 6.890446693 | 5.624589316  | 4-hydroxy-2-oxovalerate aldolase                                 |
| ACD60436 | 7.554796032 | 7.462543171 | 7.69309661   | TonB-dependent outer membrane Receptor                           |
| ACD60437 | 8.043590577 | 8.075516587 | 7.70938025   | vibrioferrin biosynthesis protein PvsA                           |
| ACD60438 | 7.725747972 | 7.540244302 | 7.446603626  | vibrioferrin biosynthesis protein PvsB                           |
| ACD60439 | 7.256652164 | 7.556912175 | 7.611570778  | transport protein                                                |
| ACD60440 | 7.478114344 | 7.61007991  | 7.167096954  | iron transporter                                                 |
| ACD60441 | 7.642484978 | 7.220426699 | 7.355007452  | diaminopimelate decarboxylase                                    |
| ACD60450 | 9.153754679 | 9.087133954 | 8.274336217  | hypothetical protein                                             |
| ACD60451 | 0           | 0           | -0.882480485 | ISXo8 transposase                                                |
| ACD60457 | 2.170319284 | 3.813750413 | 0            | transposase                                                      |
| ACD60460 | 7.478599762 | 6.664710377 | 8.005978163  | conserved hypothetical protein                                   |
| ACD60461 | 8.210554462 | 8.682524139 | 7.600953587  | glutathione transferase                                          |
| ACD60466 | 7.781162969 | 7.558573776 | 7.722493348  | multi antimicrobial extrusion family protein                     |
| ACD60477 | 7.614577346 | 7.50989374  | 6.625472149  | putative cytochrome C assembly protein                           |
| ACD60479 | 6.712403188 | 6.357127931 | 7.586066641  | alpha-N-arabinofuranosidase 2                                    |
| ACD60481 | 9.938157856 | 9.26462791  | 9.558068607  | conserved domain protein                                         |
| ACD60483 | 8.907596742 | 8.36046963  | 7.99983656   | transposase                                                      |
| ACD60485 | 8.964511266 | 8.242435782 | 8.415205146  | conserved domain protein                                         |
| ACD60486 | 6.346552736 | 5.831294575 | 5.198230893  | ISPsy21, transposase OrfB                                        |
| ACD60487 | 9.632190043 | 8.953073131 | 9.980482356  | transposase                                                      |
| ACD60489 | 6.700189999 | 6.337461346 | 6.198910558  | succinyl-diaminopimelate desuccinylase                           |
| ACD60491 | 9.341752304 | 9.045535801 | 10.11125306  | transglycosylase-associated protein                              |
| ACD60492 | 6.691073479 | 6.884243797 | 6.485521823  | aminoglycoside phosphotransferase                                |
| ACD60493 | 6.5153198   | 7.098411136 | 6.073987282  | nucleotidyl transferase                                          |
| ACD60497 | 7.603188649 | 7.991119309 | 8.257109649  | phosphoribosylformylglycinamide cyclo-ligase                     |
| ACD60498 | 7.169955057 | 7.30088332  | 6.271024083  | conserved hypothetical protein                                   |
| ACD60499 | 6.761910199 | 6.440639979 | 6.35338152   | membrane protein, putative                                       |
| ACD60500 | 6.918672455 | 6.87280414  | 5.947511875  | phosphoribosylglycinamide formyltransferase                      |
| ACD60501 | 6.923624611 | 6.442084256 | 8.406353839  | conserved hypothetical protein                                   |
| ACD60502 | 7.062963557 | 7.409866099 | 8.560558297  | conserved hypothetical protein                                   |
| ACD60506 | 7.16537937  | 6.962618426 | 9.119690768  | arabinose 5-phosphate isomerase                                  |
| ACD60507 | 7.579210325 | 7.770908313 | 9.105803772  | phosphatase, YrbI family                                         |
| ACD60508 | 7.784294578 | 7.503825738 | 8.169960067  | conserved hypothetical protein                                   |
| ACD60509 | 8.279907678 | 8.583428822 | 9.175507136  | conserved hypothetical protein                                   |
| ACD60510 | 7.378459602 | 7.208985389 | 7.63784206   | ABC transporter ATP-binding protein                              |
| ACD60511 | 7.052774523 | 7.192421048 | 6.496219451  | RNA polymerase sigma-54 factor                                   |
| ACD60512 | 10.82476785 | 11.10802126 | 10.16154762  | ribosomal subunit interface protein                              |
| ACD60513 | 7.90032947  | 8.507061216 | 8.499606747  | nitrogen regulatory IIA protein                                  |
| ACD60514 | 8.112830428 | 8.274513272 | 8.029375581  | HPr kinase/phosphorylase (HPrK/P) (HPr(Ser)kinase/phosphorylase) |
| ACD60515 | 7.591799078 | 7.577459041 | 6.6877186    | conserved hypothetical protein                                   |
| ACD60516 | 10.70791988 | 10.25901349 | 8.029988386  | hypothetical protein                                             |
| ACD60517 | 8.124028232 | 8.160824411 | 7.144841754  | sugar transport protein                                          |
| ACD60518 | 7.926349372 | 7.669983425 | 6.522371241  | phosphotransferase system HPr enzyme                             |
| ACD60519 | 7.432115919 | 7.481355457 | 6.65696823   | phosphoenolpyruvate-protein phosphotransferase                   |
| ACD60521 | 6.855242251 | 6.607191216 | 6.691227057  | magnesium transporter                                            |
| ACD60522 | 7.061948965 | 6.926319718 | 8.061349589  | phospholipase/carboxylesterase superfamily                       |
| ACD60530 | 7.572950285 | 7.429599228 | 6.600666714  | amino acid transporter                                           |
| ACD60531 | 11.30123324 | 11.28618231 | 10.43944653  | hypothetical protein                                             |
| ACD60532 | 9.661172395 | 9.880931891 | 8.734591084  | endoproteinase Arg-C                                             |
| ACD60534 | 7.180247337 | 6.1784836   | 6.953661018  | conserved hypothetical protein                                   |
| ACD60535 | 6.91353571  | 6.546198404 | 5.955849808  | hydrolase                                                        |
| ACD60539 | 8.500479418 | 6.609645645 | 6.444998287  | putative anaerobic transcriptional regulatory protein            |
| ACD60552 | 7.880942602 | 8.41460068  | 7.714630185  | shikimate kinase                                                 |
| ACD60553 | 7.057331126 | 7.395979621 | 7.605331352  | 3-dehydroquinate synthase                                        |
| ACD60554 | 10.62703223 | 11.55584012 | 13.41098127  | conserved hypothetical protein                                   |

|          |             |             |             |                                                                  |
|----------|-------------|-------------|-------------|------------------------------------------------------------------|
| ACD60555 | 7.013138399 | 7.328118384 | 8.447380829 | uroporphyrinogen decarboxylase                                   |
| ACD60557 | 3.17754631  | 3.492404421 | 3.537581844 | Tal9a, TAL effector AvrBs3/PthA                                  |
| ACD60559 | 8.185212428 | 7.421349551 | 8.672138896 | filamentous phage phiLf related protein                          |
| ACD60561 | 5.780651308 | 5.800648862 | 5.990757497 | Tal9b, TAL effector AvrBs3/PthA                                  |
| ACD60562 | 8.702051445 | 0           | 8.44001783  | probable transmembrane protein                                   |
| ACD60565 | 5.269990634 | 4.962002935 | 5.561436122 | Tal9c, also AvrXa27, TAL effector AvrBs3/PthA                    |
| ACD60566 | 8.872542531 | 9.359035722 | 7.816426911 | Chloride channel protein EriC                                    |
| ACD60569 | 5.791347854 | 5.350430061 | 5.32886518  | Tal9d, TAL effector AvrBs3/PthA                                  |
| ACD60570 | 10.2564446  | 0           | 10.65860424 | similar to membrane-bound transport protein                      |
| ACD60573 | 4.995778455 | 5.171154775 | 5.036463771 | Tal9e, TAL effector AvrBs3/PthA                                  |
| ACD60575 | 1.792318145 | 0           | 0.317280911 | transposase                                                      |
| ACD60576 | 4.972426144 | 2.401037868 | 4.957519985 | transposase                                                      |
| ACD60578 | 6.713929464 | 6.561326136 | 7.10431569  | glutamate-1-semialdehyde-2,1-aminomutase                         |
| ACD60579 | 9.971241763 | 9.619480874 | 9.777953887 | hypothetical protein                                             |
| ACD60580 | 0           | 9.946915045 | 9.773709577 | hypothetical protein                                             |
| ACD60585 | 6.521198392 | 7.194382591 | 6.525069725 | hypothetical protein                                             |
| ACD60586 | 6.916201933 | 7.054685709 | 6.321013497 | hydrolase                                                        |
| ACD60588 | 7.157165008 | 6.599334161 | 5.924221056 | ion transporter                                                  |
| ACD60594 | 7.762574717 | 7.795370848 | 6.302448836 | PAP2 superfamily protein                                         |
| ACD60595 | 0           | 0           | 0           | ISXoo6 transposase                                               |
| ACD60597 | 7.120465994 | 7.387517639 | 6.332143991 | ribosomal protein S6 modification protein                        |
| ACD60598 | 7.903098542 | 8.078385677 | 8.500343969 | two-component system regulatory protein                          |
| ACD60600 | 7.794539335 | 8.136155491 | 7.522644298 | two-component system sensor protein                              |
| ACD60606 | 8.653196195 | 0           | 6.884036167 | hypothetical protein                                             |
| ACD60610 | 7.492998782 | 7.268247232 | 6.983882867 | endonuclease                                                     |
| ACD60611 | 7.805621359 | 7.452686029 | 6.841809624 | beta-lactamase                                                   |
| ACD60612 | 6.534167459 | 7.085297174 | 6.319363229 | molybdate ABC transporter, periplasmic molybdate-binding protein |
| ACD60613 | 7.429138892 | 7.274997733 | 6.840966704 | molybdate ABC transporter, permease protein                      |
| ACD60614 | 7.38025325  | 7.396750328 | 6.220742039 | molybdenum import ATP-binding protein ModC                       |
| ACD60627 | 6.691450415 | 6.341631788 | 6.815319246 | conserved hypothetical protein                                   |
| ACD60628 | 6.601778215 | 6.072588191 | 7.787504294 | TonB-dependent receptor                                          |
| ACD60630 | 6.221239093 | 6.253197003 | 6.375214978 | Erk/YbiS/YcfS/YnhG                                               |
| ACD60631 | 7.493407164 | 7.318569924 | 7.122558839 | M23 peptidase domain protein                                     |
| ACD60641 | 7.829526135 | 7.072609626 | 7.66254733  | transposase                                                      |
| ACD60642 | 6.886281873 | 6.327953175 | 7.220649185 | ISXoo2 transposase                                               |
| ACD60648 | 7.436528331 | 7.608210459 | 7.036041703 | penicillin-binding protein 1A (PBP-1a) (PBP1a)                   |
| ACD60649 | 6.709442287 | 7.483598148 | 7.250611086 | conserved hypothetical protein                                   |
| ACD60660 | 7.591679417 | 7.366663175 | 6.965680407 | ribonuclease PH                                                  |
| ACD60661 | 7.34807304  | 7.68552673  | 6.947409011 | glyoxalase family protein                                        |
| ACD60662 | 7.725175363 | 7.457003225 | 6.555394387 | non-canonical purine NTP pyrophosphatase, RdgB/HAM1 family       |
| ACD60663 | 7.129468494 | 7.01278095  | 6.300129217 | putative oxygen-independent coproporphyrinogen III oxidase       |
| ACD60664 | 6.683710488 | 6.850174333 | 6.327757414 | conserved hypothetical protein                                   |
| ACD60665 | 7.921840937 | 8.33487661  | 7.231499611 | type IV pilus assembly protein PilZ                              |
| ACD60666 | 7.068821263 | 6.900673631 | 7.232161866 | Xaa-Pro dipeptidase                                              |
| ACD60667 | 10.21996711 | 9.968306794 | 10.16827097 | conserved hypothetical protein                                   |
| ACD60668 | 8.916981141 | 0           | 9.388906314 | conserved hypothetical protein                                   |
| ACD60671 | 9.628789996 | 9.80917003  | 10.41464296 | conserved hypothetical protein                                   |
| ACD60672 | 10.15100385 | 10.31227036 | 10.41263335 | conserved hypothetical protein                                   |
| ACD60673 | 7.077969292 | 7.50719207  | 7.46828191  | 5,10-methenyltetrahydrofolate synthetase                         |
| ACD60674 | 6.489892906 | 6.899199804 | 6.914719978 | conserved hypothetical protein                                   |
| ACD60675 | 8.749433705 | 9.022745084 | 8.572772217 | ribose 5-phosphate isomerase A                                   |
| ACD60676 | 10.42563554 | 10.90792716 | 10.05597379 | conserved hypothetical protein                                   |
| ACD60677 | 9.155850406 | 9.425473991 | 9.863264817 | tetratricopeptide repeat domain protein                          |
| ACD60679 | 8.604078739 | 9.15533688  | 9.31439971  | thiamine-phosphate pyrophosphorylase                             |
| ACD60680 | 0           | 8.537160148 | 0           | transposase                                                      |
| ACD60681 | 5.055004717 | 4.652297183 | 6.121902303 | ISPsy21, transposase OrfB                                        |
| ACD60684 | 7.744927996 | 9.922026839 | 7.600849546 | alpha-1,2-mannosidase                                            |
| ACD60687 | 8.080359203 | 8.575573281 | 9.143036211 | polyphosphate-selective porin O                                  |
| ACD60688 | 6.379575912 | 6.305695157 | 6.06945299  | sensor histidine kinase                                          |
| ACD60689 | 6.735603408 | 6.661949074 | 6.666373148 | citrate carrier protein                                          |
| ACD60690 | 6.424734015 | 5.793050509 | 6.04100856  | extracellular solute-binding protein, family 1                   |
| ACD60692 | 6.66392807  | 5.77173507  | 6.057549914 | rhizopine catabolism protein MocA                                |
| ACD60693 | 7.194727311 | 6.235382426 | 7.383306849 | conserved hypothetical protein                                   |
| ACD60698 | 8.064936728 | 8.333052457 | 6.389038438 | porin O                                                          |



|           |             |             |              |                                                                                                                           |
|-----------|-------------|-------------|--------------|---------------------------------------------------------------------------------------------------------------------------|
| ACD60699  | 7.731963856 | 7.882905889 | 6.637558083  | Mg <sup>++</sup> /citrate complex transporter                                                                             |
| ACD60700  | 7.50698587  | 7.925673114 | 5.68898878   | acetoacetyl-CoA reductase                                                                                                 |
| ACD60701  | 7.42832667  | 7.497532533 | 6.679972643  | transcriptional regulator                                                                                                 |
| ACD60703  | 7.80042755  | 7.56968855  | 6.398536784  | TonB-dependent receptor                                                                                                   |
| ACD60704  | 7.905844262 | 7.876142411 | 6.373707365  | alpha-amylase                                                                                                             |
| ACD60708  | 8.871335438 | 8.980933556 | 8.16521353   | aspartate aminotransferase                                                                                                |
| ACD60709  | 7.214668823 | 7.101954667 | 5.998608481  | conserved hypothetical protein, putative                                                                                  |
| ACD60710  | 7.046327346 | 6.994183698 | 6.55168058   | conserved hypothetical protein                                                                                            |
| ACD60712  | 9.11046765  | 9.152294984 | 10.69004164  | putative glutaredoxin homolog, putative                                                                                   |
| ACD60715  | 9.13225294  | 8.923181871 | 7.857788208  | conserved hypothetical protein                                                                                            |
| ACD60716  | 9.191631736 | 9.902414309 | 9.165967194  | conserved hypothetical protein                                                                                            |
| ACD60717  | 8.912344481 | 9.968652395 | 7.136375978  | conserved hypothetical protein                                                                                            |
| ACD60718  | 6.688054439 | 6.944612511 | 7.727314668  | rhamnogalacturonase B                                                                                                     |
| ACD60725  | 6.714602712 | 6.72583657  | 6.056951958  | methanol dehydrogenase regulator                                                                                          |
| ACD60726  | 6.490454608 | 6.520118905 | 6.107564432  | protein of unknown function                                                                                               |
| ACD60727  | 6.910636735 | 6.728940868 | 5.902104942  | membrane protein, putative                                                                                                |
| ACD60728  | 9.286881148 | 9.805363402 | 11.87954496  | outer membrane protein Slp                                                                                                |
| ACD60733  | 11.12236212 | 11.49852514 | 10.97432137  | hypothetical protein                                                                                                      |
| PXO_rna37 | 0           | 0           | 0            | XO_rna37 cdna:pseudogene<br>chromosome:GCA_000019585.1:Chromosome:4294922:4295014:1<br>gene:PXO_rna37 transcript:PXO_rna3 |
| ACD60741  | 7.72354491  | 7.581735372 | 8.004074363  | heptosyl transferase, glycosyltransferase family 9 protein                                                                |
| ACD60743  | 6.371236485 | 6.09848904  | 6.061577489  | integrase                                                                                                                 |
| ACD60750  | 0           | 0           | 8.755221421  | hypothetical protein                                                                                                      |
| ACD60757  | 7.014433407 | 7.431748304 | 7.406502657  | protein phosphatase                                                                                                       |
| ACD60761  | 10.60924339 | 11.53737373 | 8.727971492  | hydroxyacylglutathione hydrolase                                                                                          |
| ACD60762  | 8.526115774 | 8.943827581 | 7.820715086  | murein hydrolase D                                                                                                        |
| ACD60763  | 11.42179134 | 10.03190793 | 11.7608904   | hypothetical protein                                                                                                      |
| ACD60774  | 8.634752978 | 8.944659359 | 8.539848968  | membrane protein, putative                                                                                                |
| ACD60776  | 4.425325019 | 3.73684296  | 4.138830848  | ISXo5 transposase                                                                                                         |
| ACD60780  | 6.750847648 | 6.952648073 | 7.211314022  | protease                                                                                                                  |
| ACD60781  | 6.910828583 | 7.611792063 | 8.599990924  | phosphate regulon transcriptional regulatory protein PhoB                                                                 |
| ACD60782  | 6.753310363 | 6.960986569 | 6.316362999  | two-component system sensor protein                                                                                       |
| ACD60784  | 7.510677149 | 7.25016575  | 7.046065366  | polyphosphate kinase                                                                                                      |
| ACD60785  | 6.406898863 | 6.939684988 | 6.301966195  | exopolyphosphatase                                                                                                        |
| ACD60786  | 7.194313638 | 6.579202781 | 11.98721071  | glycosyl transferase                                                                                                      |
| ACD60787  | 7.164293525 | 7.278802538 | 11.38565213  | PAP2 superfamily, putative                                                                                                |
| ACD60788  | 11.64239021 | 0           | 12.19126592  | hypothetical protein                                                                                                      |
| ACD60789  | 7.250099412 | 7.513245959 | 7.719984259  | UDP-2,3-diacetylglucosamine hydrolase                                                                                     |
| ACD60790  | 8.811076008 | 9.805698737 | 9.592210338  | hypothetical protein                                                                                                      |
| ACD60799  | 10.01159068 | 9.994254425 | 10.17968521  | hypothetical protein                                                                                                      |
| ACD60803  | 6.601672749 | 6.159051895 | 6.127979881  | TonB-dependent receptor                                                                                                   |
| ACD60804  | 7.761478099 | 8.129993884 | 8.152061702  | L-threonine 3-dehydrogenase                                                                                               |
| ACD60810  | 6.294701611 | 6.318546425 | 6.774931981  | 2-amino-3-ketobutyrate coenzyme A ligase                                                                                  |
| ACD60811  | 7.553598578 | 7.20982374  | 6.470128467  | HNH endonuclease domain protein                                                                                           |
| ACD60815  | 7.466178451 | 7.456822573 | 7.334550399  | oxidoreductase                                                                                                            |
| ACD60816  | 6.237248209 | 6.646421904 | 6.548407339  | 2,4-dienoyl-CoA reductase                                                                                                 |
| ACD60817  | 6.812600905 | 6.908740867 | 6.127352637  | membrane protein, putative                                                                                                |
| ACD60819  | 0           | 0           | 0            | transposase                                                                                                               |
| ACD60820  | 5.075143239 | 5.440134971 | 4.198116929  | ISXoo3 transposase ORF B                                                                                                  |
| ACD60821  | 6.889437037 | 6.263453253 | 5.735906628  | glycerophosphodiester phosphodiesterase                                                                                   |
| ACD60823  | 4.988184769 | 5.047403152 | 4.081092453  | ISXoo11 transposase                                                                                                       |
| ACD60824  | 9.179476217 | 8.472154678 | 7.962213527  | glycerophosphodiester phosphodiesterase                                                                                   |
| ACD60826  | 8.364204708 | 8.571119311 | 7.864012763  | cell Wall Hydrolase superfamily                                                                                           |
| ACD60828  | 0           | 0           | -1.083003697 | ISXo8 transposase                                                                                                         |
| ACD60830  | 7.645644023 | 7.144525692 | 7.738727311  | glutathione S-transferase GST-4.5                                                                                         |
| ACD60833  | 8.736033177 | 9.092278806 | 9.408862558  | GTP-binding protein TypA                                                                                                  |
| ACD60834  | 7.865745641 | 8.227837324 | 8.026661758  | putative membrane protein                                                                                                 |
| ACD60835  | 7.611548648 | 6.436505012 | 6.937073626  | glu-trnAgln amidotransferase a subunit                                                                                    |
| ACD60838  | 9.62153177  | 9.624223381 | 10.47123828  | TonB-dependent outer membrane Receptor                                                                                    |
| ACD60840  | 6.531531181 | 6.723367427 | 9.209041456  | transposase                                                                                                               |
| ACD60841  | 0           | 4.090472387 | 3.123778747  | ISXoo3 transposase ORF A                                                                                                  |
| ACD60842  | 0           | 0           | 0            | transposase                                                                                                               |
| ACD60843  | 7.54525024  | 9.028453122 | 7.992915683  | transposase                                                                                                               |

|          |             |              |              |                                                               |
|----------|-------------|--------------|--------------|---------------------------------------------------------------|
| ACD60844 | 0           | 0            | 2.243638618  | transposase                                                   |
| ACD60845 | 9.015624123 | 8.647800172  | 9.530732102  | transposase (IS4 family)                                      |
| ACD60862 | 0.962719286 | 0            | 0.551136991  | ISXo5 transposase                                             |
| ACD60863 | 8.551435268 | 7.787778521  | 10.77784707  | conserved hypothetical protein                                |
| ACD60866 | 5.536481914 | 5.1769251    | 4.799791899  | ISXoo8 transposase                                            |
| ACD60874 | 7.150427667 | 7.102952015  | 7.373308898  | 6-phosphofructokinase                                         |
| ACD60875 | 4.253043795 | 0            | 3.272305428  | ISXo8 transposase                                             |
| ACD60880 | 8.448335223 | 9.43998252   | 10.17530004  | inorganic pyrophosphatase                                     |
| ACD60881 | 9.394252599 | 9.872887229  | 9.065857695  | response regulator                                            |
| ACD60887 | 8.755421735 | 9.078388346  | 10.62435682  | ketol-acid reductoisomerase                                   |
| ACD60888 | 7.839600632 | 8.204742301  | 8.27714324   | acetolactate synthase, large subunit, biosynthetic type       |
| ACD60889 | 8.797466992 | 8.899698295  | 7.839997367  | acetolactate synthase isozyme II small subunit                |
| ACD60890 | 8.186084518 | 8.493483222  | 7.728117791  | threonine dehydratase                                         |
| ACD60891 | 8.574809206 | 8.786354586  | 8.979911014  | 2-isopropylmalate synthase                                    |
| ACD60892 | 10.55294762 | 11.46189889  | 10.29817715  | Urease accessory protein UreD                                 |
| ACD60897 | 7.065970755 | 6.583162518  | 6.085312048  | transcriptional regulator LysR family                         |
| ACD60899 | 0           | 1.552229498  | -0.453994082 | ISXo5 transposase                                             |
| ACD60902 | 8.899081954 | 8.990693972  | 8.7826379    | transcriptional regulator                                     |
| ACD60903 | 8.778658691 | 8.769110529  | 9.43995344   | L-isoaspartate protein carboxylmethyltransferase              |
| ACD60904 | 7.613877846 | 7.53806474   | 7.57027317   | outer membrane protein required for AvrXa21 activity C (raxC) |
| ACD60906 | 6.973197968 | 6.87541148   | 6.227076787  | lipid A biosynthesis lauroyl acyltransferase                  |
| ACD60912 | 8.565357265 | 8.045415667  | 7.76897825   | transposase                                                   |
| ACD60913 | 6.990886807 | 6.767191303  | 6.346221175  | IS1595 transposase                                            |
| ACD60922 | 6.947034898 | 5.573423003  | 6.501085594  | peroxiredoxin                                                 |
| ACD60923 | 6.33189507  | 6.01822689   | 7.080241933  | bacterioferritin                                              |
| ACD60938 | 10.98630427 | 9.840600132  | 11.80642476  | hypothetical protein                                          |
| ACD60939 | 11.7989618  | 11.1857241   | 10.52931342  | hypothetical protein                                          |
| ACD60941 | 8.385836522 | 8.676873858  | 8.665044506  | hypothetical protein                                          |
| ACD60943 | 0           | 8.532223437  | 8.42769416   | hypothetical protein                                          |
| ACD60949 | 7.660972814 | 7.301194363  | 7.32713044   | propionate catabolism operon regulatory protein PrpR          |
| ACD60963 | 6.086554506 | 5.891550423  | 5.909326692  | septum formation protein Maf                                  |
| ACD60965 | 7.338513555 | 7.551969672  | 6.78501428   | crispr-associated helicase Cas3 domain protein                |
| ACD60966 | 7.607744567 | 8.078865972  | 6.983791683  | crispr-associated protein Cas5, <i>dvulg</i> subtype          |
| ACD60967 | 7.68258032  | 7.830641962  | 7.461168365  | crispr-associated protein, Csd1 family                        |
| ACD60968 | 7.861198594 | 7.974873426  | 7.684362915  | crispr-associated protein, Csd2 family                        |
| ACD60969 | 7.621656306 | 8.031075336  | 6.578312303  | crispr-associated protein Cas4                                |
| ACD60970 | 7.79377886  | 7.955045389  | 7.415530524  | crispr-associated protein Cas1                                |
| ACD60971 | 8.581837035 | 7.955405806  | 7.628912085  | crispr-associated protein Cas2                                |
| ACD60975 | 6.851436736 | 6.429264453  | 5.882254203  | aminoglycoside phosphotransferase                             |
| ACD60976 | 6.73202493  | 6.364680981  | 6.072463857  | TonB-dependent outer membrane Receptor                        |
| ACD60977 | 7.196607044 | 7.162975338  | 6.602633548  | PnuC protein                                                  |
| ACD60978 | 7.424367874 | 6.606859696  | 7.485853454  | transcriptional regulator                                     |
| ACD60990 | 10.29654918 | 10.87086557  | 11.87117755  | hypothetical protein                                          |
| ACD60994 | 10.6697886  | 10.37703696  | 9.020966053  | hypothetical protein                                          |
| ACD60997 | 8.612739515 | 8.166208284  | 7.458472235  | hypothetical protein                                          |
| ACD61001 | 6.699440583 | 7.25260867   | 6.436231813  | RDD family, putative                                          |
| ACD61005 | 7.066013824 | 6.871252259  | 7.116697443  | cytosol aminopeptidase                                        |
| ACD61006 | 8.604808944 | 9.437265198  | 8.065119891  | putative membrane protein                                     |
| ACD61007 | 6.307902059 | 6.114223331  | 5.179889191  | DNA polymerase III holoenzyme chi subunit                     |
| ACD61008 | 6.84289086  | 6.630868472  | 6.240375394  | valyl-tRNA synthetase                                         |
| ACD61009 | 8.176876245 | 8.195224547  | 6.100220791  | conserved hypothetical protein                                |
| ACD61010 | 0           | 8.377223547  | 8.090218302  | conserved hypothetical protein                                |
| ACD61011 | 6.165530117 | 5.756775129  | 5.130860874  | transposase                                                   |
| ACD61012 | 7.141228406 | 7.273907468  | 7.088109787  | ISXoo3 transposase ORF B                                      |
| ACD61013 | 0.424728641 | -0.001837721 | -0.974812411 | ISXo8 transposase                                             |
| ACD61015 | 5.377703349 | 5.70645872   | 4.937174875  | ISXo8 transposase                                             |
| ACD61016 | 7.368131006 | 7.131229342  | 6.640921651  | pectate lyase                                                 |
| ACD61018 | 0.38901606  | -0.031772083 | 0.582218773  | ISXo8 transposase                                             |
| ACD61026 | 8.774101781 | 9.0045351    | 9.709826514  | conserved hypothetical protein                                |
| ACD61027 | 7.043628851 | 7.029739983  | 6.676887959  | prolyl-tRNA synthetase                                        |
| ACD61028 | 9.050795518 | 9.646618109  | 10.08915913  | DNA-binding protein                                           |
| ACD61030 | 7.726899318 | 7.695576306  | 7.038008103  | ABC transporter permease                                      |
| ACD61031 | 10.61106169 | 11.99308699  | 11.34510026  | hypothetical protein                                          |
| ACD61032 | 6.886452599 | 7.216716762  | 7.043027284  | ABC transporter ATP-binding protein                           |

|          |             |             |             |                                                                       |
|----------|-------------|-------------|-------------|-----------------------------------------------------------------------|
| ACD61033 | 7.026224637 | 7.200172785 | 6.592817292 | ABC transporter substrate-binding protein                             |
| ACD61034 | 9.054989528 | 9.197545993 | 8.742339755 | lipoprotein, putative                                                 |
| ACD61036 | 7.463736879 | 7.203328424 | 7.234520481 | electron transfer flavoprotein-ubiquinone oxidoreductase              |
| ACD61037 | 7.173247387 | 6.714575239 | 6.488678884 | conserved hypothetical protein                                        |
| ACD61040 | 7.605272081 | 7.811798528 | 7.576537254 | phosphohexose mutase                                                  |
| ACD61041 | 7.670691652 | 7.605005332 | 8.199068642 | mannose-1-phosphate guanylyltransferase/mannose-6-phosphate isomerase |
| ACD61046 | 7.683029685 | 7.507762932 | 8.004866514 | electron transfer flavoprotein beta subunit                           |
| ACD61047 | 8.227794013 | 7.994228964 | 8.340629026 | electron transfer flavoprotein alpha subunit                          |
| ACD61048 | 8.909317091 | 9.24410691  | 9.960734681 | ABC transporter                                                       |
| ACD61049 | 7.896520109 | 8.012842393 | 7.767866632 | ABC transporter, ATP binding protein                                  |
| ACD61059 | 10.99755352 | 12.41274713 | 11.36325323 | hypothetical protein                                                  |
| ACD61064 | 11.55853073 | 11.44571843 | 9.503968808 | hypothetical protein                                                  |
| ACD61068 | 8.184379486 | 8.216658566 | 7.230327922 | Tfp pilus assembly protein                                            |
| ACD61071 | 7.854338571 | 7.769051005 | 8.197732727 | ATP-dependent RNA helicase                                            |
| ACD61073 | 7.615975327 | 8.061090322 | 8.013194242 | putative 6-pyruvoyl tetrahydrobiopterin synthase                      |
| ACD61074 | 8.94966624  | 9.2598021   | 12.68379732 | conserved hypothetical protein                                        |
| ACD61076 | 7.720853021 | 8.043311692 | 8.852972627 | possible Sensor with GAF domain                                       |
| ACD61077 | 8.085052802 | 8.167729233 | 7.17429655  | TfoX C-terminal domain family                                         |
| ACD61080 | 6.7950396   | 6.994568411 | 6.850949404 | beta-hydroxyacyl-(acyl-carrier-protein) dehydratase FabA              |
| ACD61081 | 6.884463608 | 6.667409633 | 7.280529528 | beta-ketoacyl-synthase I                                              |
| ACD61085 | 8.238141973 | 8.246902076 | 8.016563176 | conserved hypothetical protein                                        |
| ACD61086 | 7.588812061 | 7.0393797   | 7.207385321 | copper resistance protein A                                           |
| ACD61087 | 7.428703531 | 6.994081845 | 6.845490051 | copper resistance protein B                                           |
| ACD61088 | 8.181614442 | 8.242121337 | 8.151255065 | lactoylglutathione lyase                                              |
| ACD61089 | 0           | 0           | 0           | hypothetical protein                                                  |
| ACD61095 | 6.005736817 | 5.684549469 | 5.956611965 | ABC transporter permease                                              |
| ACD61096 | 6.412452987 | 7.025361072 | 7.605612855 | conserved domain protein                                              |
| ACD61100 | 0           | 0.556856091 | 0.549718451 | ISXo5 transposase                                                     |
| ACD61102 | 0           | 8.822217084 | 7.794032396 | conserved domain protein                                              |
| ACD61104 | 7.422729178 | 8.104058788 | 7.095966603 | conserved hypothetical protein                                        |
| ACD61116 | 6.702740646 | 6.982799682 | 8.048868273 | conserved hypothetical protein                                        |
| ACD61123 | 9.330143799 | 9.814226755 | 12.13177016 | outer membrane protein                                                |
| ACD61129 | 7.714540896 | 7.41933663  | 7.245429109 | protein YajQ                                                          |
| ACD61130 | 0           | 10.02627444 | 9.198373826 | hypothetical protein                                                  |
| ACD61131 | 6.579207307 | 5.647677153 | 5.877282906 | conserved hypothetical protein                                        |
| ACD61132 | 8.034479857 | 8.382948191 | 7.631853672 | conserved hypothetical protein                                        |
| ACD61133 | 6.829494422 | 6.596516283 | 6.536666848 | 3-oxoacyl-[acyl-carrier protein] reductase                            |
| ACD61137 | 11.44307822 | 11.27425584 | 10.56170799 | conserved hypothetical protein                                        |
| ACD61143 | 8.314433699 | 8.278969757 | 10.4048861  | conserved hypothetical protein                                        |
| ACD61146 | 7.192006713 | 6.837173768 | 7.822462485 | leucine responsive regulatory protein                                 |
| ACD61148 | 6.934669821 | 6.357342623 | 8.430398188 | methionine-R-sulfoxide reductase                                      |
| ACD61149 | 6.599697165 | 7.114564841 | 7.085350293 | putative secreted protein                                             |
| ACD61150 | 7.527336248 | 7.64316353  | 8.473446001 | flagellar motor component MotA                                        |
| ACD61151 | 7.250544768 | 7.328971064 | 7.966672711 | chemotaxis MotB protein                                               |
| ACD61152 | 7.667870842 | 7.861434352 | 7.762534855 | conserved hypothetical protein                                        |
| ACD61153 | 8.530761358 | 8.718594521 | 7.660915785 | conserved hypothetical protein                                        |
| ACD61154 | 7.010511322 | 7.03865566  | 6.545956017 | probable two-component response regulator                             |
| ACD61157 | 6.593939336 | 5.887098735 | 5.918806005 | Xanthomonas adhesin-like protein B                                    |
| ACD61158 | 7.352705567 | 6.777248739 | 7.43131373  | protease                                                              |
| ACD61160 | 6.831167877 | 7.917527232 | 7.735867376 | conserved hypothetical protein                                        |
| ACD61167 | 11.83525302 | 11.41490189 | 9.690244222 | beta-Ig-H3/fasciclin repeat containing protein                        |
| ACD61168 | 12.92167732 | 12.61726312 | 11.1445053  | hypothetical protein                                                  |
| ACD61173 | 9.720244258 | 9.890132011 | 9.838187559 | tryptophan repressor binding protein                                  |
| ACD61175 | 7.240438365 | 7.680971286 | 6.26471094  | oxidoreductase                                                        |
| ACD61177 | 7.825404046 | 7.941863386 | 6.64793325  | glycosyl transferase, group 2 family protein                          |
| ACD61178 | 7.136878357 | 7.091541171 | 7.917306433 | metallopeptidase                                                      |
| ACD61180 | 10.08399781 | 10.63468401 | 9.235169382 | conserved hypothetical protein                                        |
| ACD61187 | 8.224701139 | 7.794383373 | 8.143592396 | D-amino acid oxidase                                                  |
| ACD61189 | 4.122482224 | 3.584637858 | 2.344041616 | ISXo8 transposase                                                     |
| ACD61194 | 9.419134341 | 9.580222759 | 8.838857248 | regulatory protein                                                    |
| ACD61197 | 11.17434524 | 10.71880683 | 11.14217089 | hypothetical protein                                                  |
| ACD61198 | 8.656760917 | 8.817661627 | 8.125268806 | cytochrome D ubiquinol oxidase subunit I                              |
| ACD61201 | 6.132525434 | 4.896218558 | 5.256486112 | transposase                                                           |
| ACD61202 | 1.777110364 | 2.642073071 | 0.270672457 | ISXo8 transposase                                                     |

|          |             |             |              |                                                                             |
|----------|-------------|-------------|--------------|-----------------------------------------------------------------------------|
| ACD61203 | 0           | 0           | 0            | ISXo5 transposase                                                           |
| ACD61204 | 8.496410418 | 8.377292968 | 8.410048485  | periplasmic divalent cation tolerance protein                               |
| ACD61206 | 6.606553269 | 6.874944473 | 6.150514998  | C-type cytochrome biogenesis protein                                        |
| ACD61207 | 8.924043455 | 9.514577963 | 7.566244355  | hypothetical protein                                                        |
| ACD61208 | 7.780953079 | 8.339564998 | 7.473332346  | 3-dehydroquinate dehydratase, type II                                       |
| ACD61209 | 6.771225336 | 7.597784413 | 6.456901406  | acetyl-CoA carboxylase, biotin carboxyl carrier protein                     |
| ACD61210 | 8.01619543  | 8.710348417 | 7.08512718   | conserved hypothetical protein                                              |
| ACD61211 | 7.286696365 | 7.381785182 | 7.012825636  | acetyl-CoA carboxylase, biotin carboxylase                                  |
| ACD61215 | 6.938873855 | 6.88082019  | 6.636787005  | ribosomal protein L11 methyltransferase                                     |
| ACD61217 | 7.180774447 | 6.950736678 | 6.469482278  | transcriptional regulator PbsX family                                       |
| ACD61218 | 5.808086389 | 6.135941125 | 5.644926273  | conserved hypothetical protein                                              |
| ACD61219 | 9.322775429 | 9.488535093 | 8.856223195  | Putative fis-like DNA-binding protein                                       |
| ACD61221 | 6.607416133 | 0           | 7.27414982   | isrso17-ISXo8 transposase protein                                           |
| ACD61222 | 1.963122655 | 0.56222044  | 1.152864846  | ISXo5 transposase                                                           |
| ACD61228 | 0           | 0           | 0            | hypothetical protein                                                        |
| ACD61229 | 0           | 0           | 0            | radical SAM domain protein                                                  |
| ACD61230 | 0           | 0           | 0            | hypothetical gene                                                           |
| ACD61231 | 0           | 0           | 0            | putative secretion protein                                                  |
| ACD61232 | 0           | 0           | 0            | ABC transporter, ATP-binding protein                                        |
| ACD61233 | 0           | 0           | 0            | TPR repeat                                                                  |
| ACD61234 | 0           | 0           | 0            | transposase                                                                 |
| ACD61236 | 0           | 0           | 0            | transposase IS3                                                             |
| ACD61237 | 0           | 0           | 0            | putative transposase                                                        |
| ACD61243 | 0           | 0           | 0            | hypothetical protein                                                        |
| ACD61247 | 0.968798559 | 1.570764068 | -0.430993128 | ISXo5 transposase                                                           |
| ACD61252 | 8.073600685 | 7.999103673 | 9.333815037  | bifunctional purine biosynthesis protein PurH                               |
| ACD61253 | 6.494884378 | 6.540693766 | 5.072916124  | phosphoribosylamine--glycine ligase                                         |
| ACD61254 | 7.864644267 | 7.539941997 | 8.268336137  | conserved hypothetical protein                                              |
| ACD61255 | 7.000383165 | 6.836504874 | 6.200718165  | hypothetical membrane protein                                               |
| ACD61257 | 7.06530303  | 6.84289086  | 6.50933639   | 2-acylglycerophosphoethanolamine acyltransferase                            |
| ACD61258 | 8.757963306 | 8.639810978 | 8.477988917  | hypothetical protein                                                        |
| ACD61259 | 8.91135004  | 9.726361229 | 9.981781316  | transmembrane protein                                                       |
| ACD61263 | 11.09410408 | 8.962664693 | 9.406685469  | hypothetical protein                                                        |
| ACD61264 | 11.30871445 | 10.60282875 | 11.7387214   | hypothetical protein                                                        |
| ACD61269 | 8.766442775 | 9.228260741 | 8.963572381  | conserved hypothetical protein                                              |
| ACD61270 | 7.051698368 | 7.235392    | 6.959700615  | Putative two-component system regulatory protein with GGDEF and EAL domains |
| ACD61271 | 7.330379128 | 7.130333741 | 7.18582691   | two-component system sensor protein                                         |
| ACD61275 | 8.049091617 | 7.866833814 | 6.440560252  | membrane-bound metalloendopeptidase                                         |
| ACD61276 | 8.286950435 | 6.849811657 | 7.700203874  | hypothetical protein                                                        |
| ACD61277 | 6.814012004 | 7.249663398 | 6.779128369  | conserved hypothetical protein                                              |
| ACD61280 | 9.83081148  | 8.923773151 | 8.831319913  | multi-sensor hybrid histidine kinase                                        |
| ACD61282 | 6.868217576 | 6.447238649 | 6.947853143  | orotate phosphoribosyltransferase                                           |
| ACD61283 | 8.471463875 | 9.498647793 | 9.068649316  | conserved hypothetical protein                                              |
| ACD61284 | 7.275994091 | 7.497237114 | 6.713420885  | chromosome partitioning protein                                             |
| ACD61285 | 7.24413546  | 7.558833946 | 7.511831703  | chromosome partitioning protein                                             |
| ACD61286 | 8.193944186 | 8.673517558 | 8.604223327  | mitomycin resistance protein                                                |
| ACD61287 | 9.925079645 | 9.676182767 | 8.876876041  | hypothetical protein                                                        |
| ACD61288 | 6.955452304 | 6.540864216 | 6.423737827  | nucleotide sugar epimerase                                                  |
| ACD61289 | 6.933029637 | 7.238805963 | 6.932049357  | dolichol-phosphate mannosyltransferase                                      |
| ACD61290 | 7.723230887 | 8.118027423 | 7.460750753  | lipid A Biosynthesis N-terminal domain family                               |
| ACD61292 | 7.229116817 | 7.398709494 | 7.190634612  | conserved hypothetical protein                                              |
| ACD61296 | 5.940991248 | 5.960449156 | 5.715212486  | DNA repair protein                                                          |
| ACD61297 | 7.976008418 | 8.300531027 | 9.00307091   | arginyl-tRNA synthetase                                                     |
| ACD61298 | 7.463924839 | 7.755722154 | 7.511863322  | conserved hypothetical protein                                              |
| ACD61299 | 7.355914849 | 7.76242855  | 7.161827233  | conserved hypothetical protein                                              |
| ACD61300 | 7.154149759 | 7.16010336  | 6.530478129  | serine 3-dehydrogenase                                                      |
| ACD61303 | 10.07438234 | 9.901191227 | 10.42913471  | transcriptional regulator                                                   |
| ACD61304 | 7.283625501 | 6.753684755 | 6.726190906  | transcriptional regulator                                                   |
| ACD61313 | 9.81871318  | 8.947406088 | 8.37816478   | hypothetical protein                                                        |
| ACD61319 | 0           | 0           | 0            | hypothetical protein                                                        |
| ACD61325 | 7.481960843 | 7.564774459 | 7.417725957  | glutathione-regulated potassium-efflux system protein                       |
| ACD61332 | 6.931801228 | 7.395499862 | 7.017576778  | beta-ketoacyl-synthase II                                                   |
| ACD61333 | 5.587340986 | 6.616115051 | 5.937191357  | conserved hypothetical protein                                              |
| ACD61334 | 7.220871638 | 7.472374041 | 6.739821106  | glycosyltransferase                                                         |

|          |             |             |              |                                                                                                                        |
|----------|-------------|-------------|--------------|------------------------------------------------------------------------------------------------------------------------|
| ACD61335 | 7.729151664 | 7.746010382 | 7.746628523  | halogenase                                                                                                             |
| ACD61336 | 8.931880989 | 8.190999975 | 7.68218701   | hypothetical protein                                                                                                   |
| ACD61343 | 6.460600056 | 6.643551749 | 6.584069557  | hypothetical protein                                                                                                   |
| ACD61344 | 5.814170987 | 7.251103639 | 5.907936171  | competence protein F                                                                                                   |
| PXO_ma53 | 0           | 0           | 0            | XO_ma53 cdna:pseudogene<br>chromosome:GCA_000019585.1:Chromosome:4935878:4935954:1<br>gene:PXO_ma53 transcript:PXO_ma5 |
| ACD61346 | 8.2095216   | 8.294331262 | 8.459902877  | transport protein                                                                                                      |
| ACD61347 | 8.212248315 | 8.238672234 | 8.949952157  | hydrolase                                                                                                              |
| ACD61348 | 6.36291343  | 7.036876927 | 6.755435088  | leucine aminopeptidase                                                                                                 |
| ACD61351 | 7.564774459 | 7.652988339 | 8.658357887  | catalase                                                                                                               |
| ACD61352 | 7.486239724 | 8.115537906 | 8.956259982  | cytochrome B561                                                                                                        |
| ACD61353 | 7.11049897  | 7.662782291 | 6.907203146  | transposase                                                                                                            |
| ACD61354 | 7.17254752  | 6.480350763 | 7.537404793  | hydrolase, alpha/beta fold family protein                                                                              |
| ACD61358 | 6.92544169  | 6.114997858 | 6.944600799  | conserved hypothetical protein                                                                                         |
| ACD61367 | 6.701327257 | 6.303417289 | 7.187708372  | conserved hypothetical protein                                                                                         |
| ACD61368 | 7.693019923 | 7.040289721 | 8.039604518  | conserved hypothetical protein                                                                                         |
| ACD61369 | 8.931092055 | 9.161555179 | 10.95153243  | conserved hypothetical protein                                                                                         |
| ACD61371 | 7.163297449 | 6.800213972 | 7.616703213  | thymidylate kinase                                                                                                     |
| ACD61375 | 9.107711405 | 9.476924378 | 9.728650124  | putative secreted protein                                                                                              |
| ACD61376 | 6.927007529 | 6.693863264 | 6.864334741  | conserved hypothetical protein                                                                                         |
| ACD61388 | 8.477887759 | 8.770782805 | 10.05316565  | hypothetical protein                                                                                                   |
| ACD61395 | 6.638544519 | 6.482951513 | 7.020791085  | conserved hypothetical protein                                                                                         |
| ACD61397 | 6.750405521 | 6.443273454 | 7.774398336  | DNA/RNA non-specific endonuclease                                                                                      |
| ACD61399 | 5.457275803 | 5.090192891 | 5.604388658  | NAD-dependent epimerase/dehydratase                                                                                    |
| ACD61400 | 7.913038986 | 6.991646553 | 7.445726703  | NAD-dependent epimerase/dehydratase                                                                                    |
| ACD61403 | 7.616784067 | 8.428414613 | 10.27106612  | lipoprotein, putative                                                                                                  |
| ACD61406 | 11.76150137 | 11.46672907 | 11.41641226  | hypothetical protein                                                                                                   |
| ACD61409 | 8.267208046 | 8.672800111 | 6.236351021  | TonB-dependent receptor                                                                                                |
| ACD61410 | 7.450402976 | 7.702872214 | 6.447349418  | SapC                                                                                                                   |
| ACD61411 | 7.005557184 | 7.330809344 | 6.060808317  | pass1 domain protein                                                                                                   |
| ACD61412 | 7.616365049 | 7.980905003 | 6.706862041  | tryptophan halogenase                                                                                                  |
| ACD61413 | 8.283361582 | 8.583477715 | 8.132021537  | TonB protein                                                                                                           |
| ACD61421 | 7.005006921 | 6.815677889 | 7.237248209  | heavy metal transporter                                                                                                |
| ACD61423 | 7.835260919 | 7.754125879 | 7.967197433  | ABC transporter ATP-binding protein                                                                                    |
| ACD61424 | 7.764533264 | 8.052149581 | 7.394557013  | permease                                                                                                               |
| ACD61425 | 6.73020518  | 7.147082787 | 6.616106227  | conserved hypothetical protein                                                                                         |
| ACD61426 | 7.006802924 | 6.988014303 | 6.038899241  | 2-dehydropantoate 2-reductase                                                                                          |
| ACD61427 | 8.847862274 | 8.084813702 | 8.278728213  | hypothetical protein                                                                                                   |
| ACD61430 | 0           | 0           | 1.633738085  | ISXo8 transposase                                                                                                      |
| ACD61435 | 9.050564275 | 8.733564492 | 9.87617465   | hypothetical protein                                                                                                   |
| ACD61438 | 7.746534475 | 7.497340917 | 7.967295437  | ISXo3 transposase ORF B                                                                                                |
| ACD61440 | 7.114668943 | 6.953323449 | 6.967860271  | transposase                                                                                                            |
| ACD61442 | 6.091549634 | 5.79585005  | 5.839168508  | hypothetical protein                                                                                                   |
| ACD61443 | 6.738970448 | 6.643411771 | 7.456986803  | conserved hypothetical protein                                                                                         |
| ACD61444 | 7.336872487 | 7.237860043 | 6.544745018  | 2-polyprenylphenol 6-hydroxylase                                                                                       |
| ACD61445 | 7.400486697 | 6.807638281 | 6.361878873  | cupin region                                                                                                           |
| ACD61446 | 6.969634025 | 6.380686164 | 6.553303667  | tRNA pseudouridine synthase C                                                                                          |
| ACD61448 | 6.395469015 | 7.35696249  | 6.922923296  | peptidyl-tRNA hydrolase domain, putative                                                                               |
| ACD61449 | 8.295250068 | 8.560420731 | 8.591556006  | acyltransferase                                                                                                        |
| ACD61450 | 9.845938471 | 10.45703196 | 10.04691936  | hypothetical protein                                                                                                   |
| ACD61452 | 8.183471627 | 8.028977946 | 8.99150484   | peptidyl-dipeptidase dcp                                                                                               |
| ACD61458 | 6.37389699  | 6.006906126 | 6.449992138  | transcriptional regulator                                                                                              |
| ACD61461 | 8.363736162 | 9.185903702 | 7.023665655  | membrane protein YebN                                                                                                  |
| ACD61463 | 7.171096715 | 6.633973136 | 6.330106591  | hypothetical protein                                                                                                   |
| ACD61464 | 6.853733723 | 6.221774635 | 5.952354536  | conserved hypothetical protein                                                                                         |
| ACD61467 | 9.749168855 | 9.737443408 | 10.11774698  | shikimate kinase                                                                                                       |
| ACD61468 | 8.494063534 | 8.845352047 | 9.277103709  | polyvinylalcohol dehydrogenase                                                                                         |
| ACD61472 | 7.33084519  | 6.894090171 | 6.138017802  | ISXoo3 transposase ORF A                                                                                               |
| ACD61475 | 0           | 0           | 0            | putative transposase                                                                                                   |
| ACD61476 | 0           | 0           | -1.002625207 | ISXo8 transposase                                                                                                      |
| ACD61478 | 8.097842519 | 8.142260256 | 10.22271039  | transposase                                                                                                            |
| ACD61480 | 6.92677039  | 6.520070175 | 5.815045079  | acetyltransferase                                                                                                      |
| ACD61482 | 7.69128988  | 8.425597773 | 7.986757914  | ABC transporter ATP-binding protein                                                                                    |

|          |             |             |             |                                                             |
|----------|-------------|-------------|-------------|-------------------------------------------------------------|
| ACD61483 | 7.727267011 | 8.416835521 | 8.050224146 | toluene tolerance protein                                   |
| ACD61484 | 8.559063469 | 8.769976653 | 9.527983229 | toluene tolerance protein                                   |
| ACD61485 | 8.21273955  | 8.537435856 | 9.997814579 | toluene tolerance protein Ttg2D                             |
| ACD61486 | 9.708063051 | 10.07412808 | 10.56566381 | conserved hypothetical protein                              |
| ACD61487 | 7.960476958 | 8.421008647 | 8.799764058 | lipoprotein                                                 |
| ACD61492 | 5.17892175  | 4.624621481 | 5.308459174 | ISXo2 putative transposase                                  |
| ACD61494 | 0           | 8.79179454  | 0           | transposase                                                 |
| ACD61496 | 4.535001589 | 5.288325337 | 6.641340823 | ISXo8 transposase                                           |
| ACD61497 | 5.316410067 | 0           | 4.970651221 | transposase                                                 |
| ACD61500 | 9.473275515 | 0           | 10.10313041 | hypothetical protein                                        |
| ACD61501 | 7.373639512 | 7.502338559 | 6.754433249 | benzoate transporter                                        |
| ACD61502 | 8.675646591 | 8.379620962 | 7.440503777 | benzoate transporter                                        |
| ACD61507 | 11.53297437 | 11.2061841  | 11.46090123 | hypothetical protein                                        |
| ACD61517 | 9.827042542 | 9.781595772 | 9.153250542 | alcohol dehydrogenase                                       |
| ACD61520 | 0           | 0           | 0           | transposase (IS4 family)                                    |
| ACD61521 | 9.614424589 | 9.525875077 | 7.731936712 | outer membrane lipoprotein/x3b lipocalin                    |
| ACD61522 | 11.29917367 | 9.218379179 | 10.08557868 | conserved hypothetical protein                              |
| ACD61523 | 5.054926599 | 5.232568667 | 3.301836366 | transposase                                                 |
| ACD61528 | 9.853613659 | 10.74899785 | 8.779374643 | phenylalanine-4-hydroxylase                                 |
| ACD61529 | 7.634854603 | 8.128020106 | 6.030969436 | conserved hypothetical protein                              |
| ACD61531 | 0           | 7.803272249 | 7.850580672 | hypothetical protein                                        |
| ACD61535 | 4.755074506 | 0           | 3.22836619  | transposase (IS4 family)                                    |
| ACD61541 | 7.90312265  | 7.868976845 | 8.776837654 | conserved hypothetical protein                              |
| ACD61542 | 6.614927704 | 6.471498016 | 5.746471325 | ribosomal large subunit pseudouridine synthase E            |
| ACD61546 | 7.365193848 | 6.476665208 | 7.261972658 | hypothetical protein                                        |
| ACD61548 | 0           | 0           | 7.659417985 | hypothetical protein                                        |
| ACD61554 | 10.1283166  | 6.646263481 | 8.067574186 | hypothetical protein                                        |
| ACD61555 | 7.02001319  | 6.263164017 | 6.711384773 | xylosidase                                                  |
| ACD61560 | 8.049521865 | 8.170495955 | 6.60633414  | conserved hypothetical protein                              |
| ACD61561 | 7.808552377 | 7.78630884  | 7.533890347 | secreted protein of porin family                            |
| ACD61562 | 8.693898102 | 8.360447682 | 8.717025179 | protein of unknown function                                 |
| ACD61563 | 7.664546839 | 7.727988505 | 6.93429239  | solute/x3aNa+ symporter                                     |
| ACD61564 | 9.196378359 | 0           | 8.362636452 | hypothetical protein                                        |
| ACD61566 | 6.920186095 | 7.221674115 | 7.090070065 | exodeoxyribonuclease III                                    |
| ACD61567 | 7.731658449 | 7.672255603 | 7.684110398 | conserved hypothetical protein                              |
| ACD61569 | 0           | 10.09349679 | 9.68554425  | hypothetical protein                                        |
| ACD61570 | 6.985762259 | 6.633742153 | 8.476960821 | HetI                                                        |
| ACD61573 | 7.186540174 | 6.852785411 | 7.76586621  | methyltransferase GidB                                      |
| ACD61575 | 9.127024463 | 9.921973302 | 9.054645014 | conserved hypothetical protein                              |
| ACD61576 | 11.75271515 | 11.92095571 | 12.74943999 | ribosomal protein L28                                       |
| ACD61577 | 9.275337689 | 10.02310285 | 9.595746069 | ribosomal protein L33                                       |
| ACD61581 | 6.173141429 | 6.558168124 | 6.182859119 | transcriptional regulator                                   |
| ACD61582 | 7.698690778 | 7.36274164  | 6.659282393 | cardiolipin synthase                                        |
| ACD61584 | 7.292864555 | 7.125124128 | 6.462053955 | conserved hypothetical protein                              |
| ACD61585 | 7.042786586 | 7.231259588 | 7.160295003 | DNA helicase II                                             |
| ACD61589 | 8.499200117 | 8.46515823  | 7.5107879   | hypothetical protein                                        |
| ACD61590 | 6.873788596 | 6.658182914 | 6.121305569 | zinc-binding alcohol dehydrogenase family protein, putative |
| ACD61591 | 5.532301373 | 6.83047084  | 6.216722581 | conserved hypothetical protein                              |
| ACD61592 | 6.828047603 | 7.371532727 | 6.920221831 | hypothetical protein                                        |
| ACD61593 | 6.996377447 | 7.426734393 | 7.744134179 | glutathione peroxidase                                      |
| ACD61595 | 0           | 0           | -0.012148   | ISXo8 transposase                                           |
| ACD61598 | 7.718258866 | 8.011674533 | 7.306772606 | peptidase, S54 (rhomboid) family                            |
| ACD61599 | 8.879172743 | 9.056030707 | 10.1676314  | conserved hypothetical protein                              |
| ACD61600 | 7.29117991  | 7.422148886 | 6.7473874   | D-3-phosphoglycerate dehydrogenase                          |
| ACD61603 | 7.404034547 | 7.272611124 | 7.177578998 | conserved hypothetical protein                              |
| ACD61604 | 6.793063518 | 6.479901494 | 6.029382207 | peptidase                                                   |
| ACD61607 | 2.491740241 | 1.201564861 | 1.081905413 | transposase                                                 |
| ACD61615 | 7.030258821 | 7.063492157 | 7.698517156 | transcriptional regulator for cryptic hemolysin             |
| ACD61616 | 5.115412017 | 6.044623621 | 5.700744871 | outer membrane efflux protein                               |
| ACD61617 | 7.237018704 | 7.163498732 | 6.427232378 | conserved hypothetical protein                              |
| ACD61621 | 7.077093423 | 6.522245681 | 7.045541261 | phospholipase D active site domain protein                  |
| ACD61623 | 10.00677488 | 9.615331688 | 10.89880542 | conserved hypothetical protein                              |
| ACD61624 | 6.617114784 | 6.008816277 | 6.455429151 | plasmid stabilization system protein, RelE/ParE family      |
| ACD61625 | 8.639952029 | 9.655691709 | 10.2008128  | hypothetical protein                                        |

|          |             |             |             |                                                            |
|----------|-------------|-------------|-------------|------------------------------------------------------------|
| ACD61635 | 0           | 0           | 0           | prophage Lp2 protein 6                                     |
| ACD61647 | 7.726865268 | 7.665506472 | 6.885330315 | export protein                                             |
| ACD61648 | 6.855989697 | 6.890239953 | 6.266683487 | peptidase, S54 (rhomboid) family, putative                 |
| ACD61650 | 8.18070484  | 8.423590776 | 8.758593004 | phosphatase                                                |
| ACD56679 | 7.104116464 | 7.735109185 | 7.677028956 | pyridoxal phosphate biosynthesis protein PdxJ              |
| ACD56680 | 9.210442442 | 10.04550031 | 10.01884    | conserved hypothetical protein                             |
| ACD56681 | 7.006129685 | 6.848522793 | 6.203714076 | cardiolipin synthetase                                     |
| ACD56682 | 7.826167108 | 7.581953751 | 8.027917052 | fructose-1,6-bisphosphatase                                |
| ACD56683 | 7.863064989 | 8.143189311 | 9.240958246 | aspartate aminotransferase                                 |
| ACD56686 | 8.606360793 | 7.994455271 | 7.844467257 | hypothetical protein                                       |
| ACD56687 | 7.388800865 | 7.599942588 | 7.281503529 | ISXoo7 transposase                                         |
| ACD56688 | 7.62391806  | 7.98638818  | 7.877909856 | L-lactate dehydrogenase                                    |
| ACD56689 | 8.482089959 | 8.330361199 | 7.627490111 | isoprenylcysteine carboxyl methyltransferase (icmt) family |
| ACD56690 | 6.708297614 | 5.981889177 | 7.558971664 | transcriptional regulator                                  |
| ACD56691 | 0           | 8.206828784 | 10.23515262 | transcriptional regulator                                  |
| ACD56693 | 10.70980756 | 10.3003068  | 10.22770017 | hypothetical protein                                       |
| ACD56694 | 9.990742183 | 9.60519058  | 9.538132659 | hypothetical protein                                       |
| ACD56695 | 7.280158307 | 7.21229696  | 7.510202406 | 2-keto-3-deoxygluconate kinase                             |
| ACD56698 | 0           | 0           | 0           | transposase                                                |
| ACD56699 | 0           | 0           | 0           | conserved hypothetical protein                             |
| ACD56700 | 0           | 0           | 0           | LasA                                                       |
| ACD56701 | 0           | 0           | 0           | hypothetical protein                                       |
| ACD56703 | 0           | 0           | 0           | proline-betaine transporter                                |
| ACD56704 | 0           | 0           | 0           | proline/betaine transporter                                |
| ACD56705 | 0           | 0           | 0           | ISXo2 putative transposase                                 |
| ACD56706 | 10.16259274 | 10.14956931 | 8.509529587 | thioredoxin                                                |
| ACD56707 | 8.915422304 | 9.489749637 | 8.590231478 | AtsE                                                       |
| ACD56708 | 7.053057017 | 6.536424409 | 5.697670973 | conserved hypothetical protein                             |
| ACD56709 | 6.604734087 | 6.565254434 | 6.870475692 | MutT-nudix family protein                                  |
| ACD56714 | 7.175055469 | 7.879675138 | 8.000760596 | ISXoo15 transposase                                        |
| ACD56715 | 6.336083396 | 6.102775692 | 5.975185351 | ISXoo2 transposase                                         |
| ACD56719 | 2.096170754 | 0           | 0.688672738 | ISXoo6 transposase                                         |
| ACD56722 | 0           | 9.082143718 | 9.059558077 | hypothetical protein                                       |
| ACD56723 | 7.487944515 | 8.349856202 | 8.851355525 | histone H1                                                 |
| ACD56728 | 6.738889407 | 7.097758261 | 6.484441078 | HpaF leucine rich hrp associated protein                   |
| ACD56729 | 9.87771358  | 9.808674642 | 9.214268116 | conserved hypothetical protein                             |
| ACD56730 | 12.77329789 | 13.81949057 | 10.37485474 | hypothetical protein                                       |
| ACD56731 | 9.406068916 | 9.728568501 | 8.980028157 | HrpF/NolX/HrpK                                             |
| ACD56736 | 10.9090155  | 9.797160548 | 8.83039161  | HpaB                                                       |
| ACD56737 | 12.33302953 | 13.1931172  | 12.29640578 | HrpE type III pilin                                        |
| ACD56738 | 12.15719217 | 12.63290207 | 12.43193363 | HrpD6                                                      |
| ACD56739 | 8.262179431 | 8.234649805 | 6.687214695 | HrpD5                                                      |
| ACD56740 | 7.561723266 | 7.546346595 | 6.959549933 | HpaA                                                       |
| ACD56741 | 9.26751239  | 9.680876375 | 8.555624458 | HrcS                                                       |
| ACD56742 | 8.185638629 | 8.752407409 | 8.236707859 | type III secretion apparatus protein, YscrR/HrcR family    |
| ACD56743 | 7.552907286 | 7.52767248  | 7.111970261 | type III secretion apparatus protein, YscQ/HrcQ family     |
| ACD56745 | 7.289576291 | 7.028149189 | 6.395074799 | HrcV                                                       |
| ACD56746 | 6.810263141 | 6.683724522 | 6.743286062 | HrcU                                                       |
| ACD56754 | 7.815428129 | 8.984785851 | 7.206555319 | hypothetical protein                                       |
| ACD56757 | 11.23625941 | 11.78699243 | 10.88816484 | Hpa1                                                       |
| ACD56758 | 9.680271605 | 10.06623722 | 9.734839999 | hypothetical protein                                       |
| ACD56760 | 7.800188081 | 7.719429894 | 6.828174575 | putative protein                                           |
| ACD56762 | 11.777769   | 10.77704157 | 11.24304304 | hypothetical protein                                       |
| ACD56763 | 10.43050482 | 9.9259134   | 10.19483071 | ISXoo2 transposase                                         |
| ACD56764 | 8.218597139 | 7.944676926 | 8.892621742 | transposase                                                |
| ACD56765 | 11.06312539 | 11.32438309 | 10.35518589 | putative transposase                                       |
| ACD56766 | 9.302915328 | 10.12453493 | 9.809662032 | conserved hypothetical protein                             |
| ACD56768 | 8.767098586 | 7.669111828 | 7.984384278 | conserved hypothetical protein                             |
| ACD56771 | 7.415403762 | 7.636878339 | 7.085743313 | ABC transporter substrate binding protein                  |
| ACD56773 | 10.46941797 | 10.33361381 | 9.001608047 | hypothetical protein                                       |
| ACD56775 | 7.175674292 | 7.69642511  | 7.383289566 | Putative signal protein with GGDEF domain                  |
| ACD56776 | 11.21090264 | 12.20657791 | 11.70703984 | hypothetical protein                                       |
| ACD56785 | 9.762247481 | 9.199662531 | 8.95886297  | methylamine utilization protein                            |
| ACD56786 | 5.23457796  | 3.954084614 | 4.431308715 | ISXo8 transposase                                          |

|          |             |             |              |                                                        |
|----------|-------------|-------------|--------------|--------------------------------------------------------|
| ACD56788 | 2.543265727 | 4.140713226 | 3.864354552  | ISXo5 transposase                                      |
| ACD56792 | 8.282828969 | 7.061484606 | 8.295750571  | putative secreted protein                              |
| ACD56796 | 7.433034546 | 6.916715481 | 6.625654787  | ATP-dependent RNA helicase                             |
| ACD56797 | 9.220138866 | 8.749688451 | 7.202545059  | hypothetical protein                                   |
| ACD56801 | 9.196112744 | 8.821920635 | 7.456641899  | dihydrolipoamide acyltransferase                       |
| ACD56802 | 0           | 0           | 0.571744757  | ISXo5 transposase                                      |
| ACD56803 | 7.547557793 | 6.501295824 | 7.595958608  | dihydrolipoamide acyltransferase                       |
| ACD56807 | 10.07371314 | 9.962343686 | 10.6953066   | membrane protein, putative                             |
| ACD56810 | 0           | 0           | 0            | conserved hypothetical protein                         |
| ACD56818 | 0           | 0           | 0            | ISXo5 transposase                                      |
| ACD56819 | 9.145389601 | 8.835298821 | 9.56502018   | transposase                                            |
| ACD56820 | 7.352467231 | 6.745022149 | 7.20030032   | plasmid stabilization system protein, RelE/ParE family |
| ACD56821 | 9.195003027 | 9.051124634 | 9.263100152  | antitoxin of toxin-antitoxin stability system          |
| ACD56822 | 8.243050183 | 7.82000021  | 7.882801982  | hemolysin III                                          |
| ACD56825 | 9.356559811 | 9.441995898 | 8.652812714  | conserved hypothetical protein                         |
| ACD56826 | 7.274708939 | 7.153339222 | 7.891741181  | avirulence protein AvrBs2                              |
| ACD56827 | 6.921840937 | 8.479966146 | 8.088729947  | hypothetical protein                                   |
| ACD56828 | 7.284560401 | 6.843468863 | 7.089900632  | ROK family protein                                     |
| ACD56831 | 6.358267896 | 6.053919367 | 5.95623326   | saccharopine dehydrogenase                             |
| ACD56835 | 6.150435791 | 6.28156473  | 6.330983187  | DNA topoisomerase                                      |
| ACD56837 | 8.722414791 | 10.5789953  | 10.07474358  | hypothetical protein                                   |
| ACD56843 | 0           | 0           | -0.447390778 | ISXo5 transposase                                      |
| ACD56848 | 10.9981814  | 11.34027852 | 11.88094566  | putative transposase                                   |
| ACD56849 | 5.839004695 | 4.187348114 | 5.22282774   | putative ISXoo4 transposase                            |
| ACD56850 | 7.503324881 | 8.038095925 | 8.170531006  | 4-deoxy-L-threo-5-hexosulose-uronate ketol-isomerase   |
| ACD56851 | 8.457623018 | 8.71404971  | 10.38766195  | 4-deoxy-L-threo-5-hexosulose-uronate ketol-isomerase   |
| ACD56852 | 6.750472519 | 7.123003954 | 6.373378507  | transcriptional regulator LacI family                  |
| ACD56854 | 10.8618856  | 9.911218195 | 10.01897905  | conserved domain protein                               |
| ACD56856 | 9.634055933 | 10.04265802 | 6.978435906  | conserved hypothetical protein                         |
| ACD56857 | 9.712937912 | 9.033541386 | 6.795598132  | conserved hypothetical protein                         |
| ACD56858 | 7.548868136 | 7.865454911 | 6.441913342  | 1,4-alpha-glucan branching enzyme                      |
| ACD56859 | 7.92991524  | 7.932657681 | 6.54836418   | alpha-amylase family protein                           |
| ACD56860 | 7.759761713 | 8.084829643 | 6.88787859   | alpha-amylase                                          |
| ACD56868 | 0           | 0           | 0            | ISXo8 transposase                                      |
| ACD56869 | 6.888877164 | 7.115210155 | 6.731305453  | ComM                                                   |
| ACD56870 | 7.778280867 | 8.332502075 | 8.226638575  | conserved hypothetical protein                         |
| ACD56876 | 6.243916566 | 5.987086614 | 7.097663464  | spermidine synthase                                    |
| ACD56877 | 9.40319954  | 8.142030452 | 8.189379824  | hypothetical protein                                   |
| ACD56888 | 7.71101301  | 7.810970008 | 8.288723066  | glucose-inhibited division protein A                   |
| ACD56889 | 8.45030399  | 8.787719763 | 9.260769025  | lipoprotein, putative                                  |
| ACD56893 | 7.821856875 | 7.614518454 | 7.588444808  | aspartyl-asparaginyl beta-hydroxylase                  |
| ACD56894 | 6.725482146 | 6.520186495 | 6.707248682  | biotin biosynthesis protein BioC                       |
| ACD56895 | 6.846204949 | 7.029927669 | 6.809530205  | oxidoreductase                                         |
| ACD56896 | 7.113992142 | 6.843506551 | 6.807342041  | putative pimeloyl-BioC--CoA transferase BioH           |
| ACD56897 | 4.900205069 | 6.852660587 | 6.305768106  | conserved hypothetical protein                         |
| ACD56901 | 7.058738591 | 6.843694975 | 6.390997784  | sensor histidine kinase                                |
| ACD56902 | 7.625570045 | 7.876596753 | 7.37321318   | thymidine kinase                                       |
| ACD56903 | 9.740666203 | 8.537000912 | 9.71636678   | hypothetical protein                                   |
| ACD56908 | 9.354330938 | 8.91861283  | 8.372355784  | hypothetical protein                                   |
| ACD56909 | 6.446145376 | 5.943044569 | 6.311850015  | protein of unknown function                            |
| ACD56912 | 6.632160591 | 6.235326894 | 6.584457469  | tryptophan halogenase                                  |
| ACD56913 | 6.913320284 | 6.601631154 | 6.720552092  | TonB-dependent outer membrane receptor                 |
| ACD56914 | 7.024773996 | 7.351787316 | 7.109130679  | TonB-dependent outer membrane receptor                 |
| ACD56915 | 7.411282172 | 7.255916109 | 6.190928885  | transcriptional regulator LacI family                  |
| ACD56920 | 8.093243242 | 9.153359491 | 8.481621858  | conserved hypothetical protein                         |
| ACD56926 | 0           | 0.57128848  | -0.441362065 | ISXo5 transposase                                      |
| ACD56927 | 6.65487944  | 6.172261477 | 5.987370895  | lipoprotein                                            |
| ACD56928 | 7.659610647 | 7.225284571 | 7.99051813   | conserved hypothetical protein                         |
| ACD56929 | 7.338139128 | 7.131260215 | 7.252324822  | ABC transporter ATP-binding protein                    |
| ACD56934 | 6.988184769 | 6.795130538 | 6.113990059  | aminotransferase, class V superfamily                  |
| ACD56937 | 7.205353411 | 7.28437532  | 6.71168762   | HipA                                                   |
| ACD56938 | 7.392274485 | 6.562272957 | 7.17851547   | transcriptional regulator                              |
| ACD56939 | 7.383341413 | 7.326447465 | 6.59552753   | indolepyruvate ferredoxin oxidoreductase chain alpha   |
| ACD56953 | 7.282699259 | 7.556590353 | 6.269936419  | domain of unknown function (306) family                |



|          |             |             |             |                                                                                                       |
|----------|-------------|-------------|-------------|-------------------------------------------------------------------------------------------------------|
| ACD56955 | 7.845697031 | 7.887969952 | 7.577134216 | undecaprenyl-diphosphatase                                                                            |
| ACD56963 | 8.242845412 | 6.455895966 | 6.830977809 | transposase                                                                                           |
| ACD56964 | 3.267424933 | 0.554539738 | 2.874616003 | ISXo5 transposase                                                                                     |
| ACD56965 | 8.028668599 | 8.092323739 | 6.623442581 | microcystin dependent protein                                                                         |
| ACD56966 | 7.141003548 | 7.65047737  | 6.523460023 | microcystin dependent protein                                                                         |
| ACD56967 | 6.342752064 | 6.815818761 | 6.150908935 | microcystin dependent protein                                                                         |
| ACD56970 | 6.239724536 | 6.185924014 | 7.795883809 | RecF/RecN/SMC N terminal domain protein                                                               |
| ACD56971 | 8.939247151 | 8.909689112 | 9.475046366 | hypothetical protein                                                                                  |
| ACD56979 | 9.233250568 | 10.30755375 | 11.33127527 | lipoprotein, putative                                                                                 |
| ACD56983 | 7.070088735 | 6.760620161 | 7.053589259 | ISXo2 putative transposase                                                                            |
| ACD56984 | 8.90618711  | 7.953905415 | 7.438284533 | DNA-binding protein                                                                                   |
| ACD56986 | 13.53827382 | 14.15327493 | 13.94393414 | hypothetical protein                                                                                  |
| ACD56988 | 12.80805718 | 13.37548749 | 14.1125291  | organic hydroperoxide resistance protein                                                              |
| ACD56989 | 9.777927594 | 10.01381117 | 9.56752073  | transcriptional regulator MarR family                                                                 |
| ACD56993 | 2.739418254 | 2.617606457 | 6.888073488 | IS1112 transposase                                                                                    |
| ACD56994 | 0           | 0           | 0           | ISXo8 transposase                                                                                     |
| ACD56996 | 9.110715584 | 9.576658178 | 9.370255841 | transcriptional regulator TetR family                                                                 |
| ACD56999 | 7.077616872 | 6.634571488 | 7.190407448 | Putative signal protein with EAL domain                                                               |
| ACD57002 | 7.162008574 | 7.726068261 | 6.420057899 | putative signal transduction protein                                                                  |
| ACD57005 | 5.38263613  | 5.537997983 | 8.457590188 | ISXo3 transposase ORF B                                                                               |
| ACD57006 | 6.626601212 | 6.364059344 | 6.020057652 | beta-xylosidase (1,4-beta-D-xylan xylohydrolase) (Xylan1,4-beta-xylosidase) (Exo-beta-(1,4)-xylanase) |
| ACD57007 | 7.866864716 | 7.749675044 | 8.296048953 | transport protein                                                                                     |
| ACD57008 | 7.844360543 | 7.480030794 | 6.504224709 | TonB-dependent receptor                                                                               |
| ACD57017 | 7.179779739 | 6.597306201 | 6.427487172 | D-mannonate oxidoreductase                                                                            |
| ACD57018 | 6.566512278 | 6.239808534 | 5.890342111 | glucan 1,4-beta-glucosidase                                                                           |
| ACD57019 | 7.497700176 | 7.018467268 | 6.916034692 | xylosidase\3b arabinosidase                                                                           |
| ACD57020 | 7.317855756 | 6.745170091 | 6.446027895 | starvation sensing protein                                                                            |
| ACD57021 | 6.421533016 | 6.148334212 | 5.932373041 | sialic acid-specific 9-O-acetylsterase                                                                |
| ACD57022 | 6.581405483 | 6.391332963 | 6.409435065 | alpha-glucuronidase                                                                                   |
| ACD57023 | 10.75991314 | 10.1670041  | 8.954301018 | hypothetical protein                                                                                  |
| ACD57024 | 8.743679893 | 9.342616966 | 9.830515207 | hypothetical protein                                                                                  |
| ACD57031 | 6.742140985 | 7.246560102 | 6.535057595 | hydrolase                                                                                             |
| ACD57032 | 7.654048807 | 7.249644437 | 7.647976408 | ferrochelataase                                                                                       |
| ACD57037 | 8.608775983 | 8.580575153 | 8.081334301 | membrane protein, putative                                                                            |
| ACD57038 | 7.705487247 | 7.862209599 | 7.66797016  | GMP synthase                                                                                          |
| ACD57039 | 11.5057421  | 12.15522302 | 11.99434283 | hypothetical protein                                                                                  |
| ACD57042 | 7.142045773 | 7.085881375 | 7.131270505 | type II secretory pathway ATPase                                                                      |
| ACD57044 | 13.03478005 | 12.93526268 | 14.05529091 | hypothetical protein                                                                                  |
| ACD57047 | 8.428020922 | 8.662415592 | 7.986723789 | TonB-dependent receptor                                                                               |
| ACD57049 | 11.5551499  | 10.75404401 | 10.6439734  | putative ISXo8 transposase                                                                            |
| ACD57050 | 7.408576008 | 7.465117406 | 8.29349464  | colicin V secretion/processing ATP-binding protein CvaB                                               |
| ACD57051 | 7.174186674 | 7.158902489 | 7.176701749 | ATPase                                                                                                |
| ACD57052 | 7.454891469 | 8.045262754 | 7.930908795 | conserved hypothetical protein                                                                        |
| ACD57054 | 7.246902076 | 7.346088175 | 6.368914985 | nitrile hydratase activator                                                                           |
| ACD57056 | 6.807908708 | 7.19313106  | 6.245778956 | nuclease                                                                                              |
| ACD57057 | 7.291842956 | 7.887525271 | 6.007433239 | cytochrome C5                                                                                         |
| ACD57063 | 6.510767332 | 7.322306753 | 6.700398101 | transcriptional regulator, TetR family                                                                |
| ACD57070 | 0           | 0           | 9.565063987 | transposase                                                                                           |
| ACD57072 | 9.412436473 | 9.953694479 | 9.645791709 | hypothetical protein                                                                                  |
| ACD57073 | 7.593951284 | 7.208097765 | 8.231077144 | putative secreted protein                                                                             |
| ACD57078 | 7.27518402  | 6.847984383 | 6.958599113 | monooxygenase                                                                                         |
| ACD57079 | 6.450091146 | 6.701549057 | 6.302344643 | chitooligosaccharide deacetylase                                                                      |
| ACD57080 | 6.998274497 | 6.871535663 | 6.402696599 | conserved hypothetical protein                                                                        |
| ACD57081 | 6.686808643 | 6.216000799 | 6.381672723 | polysaccharide deacetylase family protein                                                             |
| ACD57082 | 6.275571421 | 6.360827775 | 6.493195781 | purine catabolism protein PucG                                                                        |
| ACD57083 | 4.210147252 | 4.515270908 | 5.737232468 | ISXoo2 transposase                                                                                    |
| ACD57089 | 10.72691634 | 10.9532143  | 11.72702274 | gas vesicle protein                                                                                   |
| ACD57091 | 9.877669108 | 10.36404708 | 11.8484156  | conserved hypothetical protein                                                                        |
| ACD57092 | 10.2188417  | 11.15059775 | 11.09570689 | conserved hypothetical protein                                                                        |
| ACD57093 | 0           | 0           | 0           | hypothetical protein                                                                                  |
| ACD57094 | 7.283106879 | 7.071322913 | 7.867179879 | transcriptional regulator LysR family                                                                 |
| ACD57096 | 9.357032893 | 9.517417436 | 8.045819716 | conserved domain protein                                                                              |
| ACD57097 | 0           | 10.00641024 | 10.18036919 | hypothetical protein                                                                                  |

|          |             |             |             |                                                                                                     |
|----------|-------------|-------------|-------------|-----------------------------------------------------------------------------------------------------|
| ACD57103 | 7.245970956 | 6.170115344 | 5.799791899 | two-component system regulatory protein                                                             |
| ACD57104 | 6.823354501 | 7.027253596 | 5.843225125 | sensor protein BaeS                                                                                 |
| ACD57105 | 8.42311591  | 8.663458482 | 7.980362393 | sensor protein BaeS                                                                                 |
| ACD57106 | 7.47253651  | 7.276561801 | 6.764314304 | 5,10-methylenetetrahydrofolate reductase                                                            |
| ACD57107 | 7.578636862 | 7.503857533 | 6.971313624 | conserved hypothetical protein                                                                      |
| ACD57108 | 7.629371193 | 7.760254219 | 7.365937444 | transcriptional regulator, LysR family                                                              |
| ACD57113 | 6.619638964 | 6.927695012 | 6.205638832 | 2-keto-3-deoxy-D-gluconate transport system                                                         |
| ACD57115 | 7.732099572 | 8.061948965 | 7.438492473 | phosphate-selective porin O and P                                                                   |
| ACD57116 | 5.902621121 | 5.696408417 | 6.893374346 | phosphate-selective porin O and P                                                                   |
| ACD57118 | 7.766866768 | 7.944671071 | 8.282523206 | oxidoreductase                                                                                      |
| ACD57120 | 9.361035774 | 10.44973675 | 8.839080933 | conserved hypothetical protein                                                                      |
| ACD57121 | 7.507667804 | 7.638320059 | 7.374326599 | conserved hypothetical protein                                                                      |
| ACD57122 | 7.561471254 | 7.332636334 | 7.776452773 | conserved hypothetical protein                                                                      |
| ACD57124 | 6.918481648 | 6.35983915  | 6.32083123  | dipeptidyl peptidase                                                                                |
| ACD57126 | 8.967468369 | 9.360245745 | 8.837962158 | hypothetical protein                                                                                |
| ACD57127 | 8.586370695 | 8.436116021 | 7.499997322 | conserved domain protein                                                                            |
| ACD57128 | 7.411477092 | 7.579202781 | 6.688320256 | xanthomonadin biosynthesis pteridine-dependent deoxygenase like protein                             |
| ACD57129 | 7.970968661 | 8.245181884 | 7.479222476 | hydroxylase                                                                                         |
| ACD57138 | 0           | 10.40822358 | 9.34698569  | conserved hypothetical protein                                                                      |
| ACD57141 | 6.842161743 | 6.970669625 | 6.46308782  | pathogenicity protein                                                                               |
| ACD57142 | 6.941129792 | 6.643779725 | 6.543109174 | pathogenicity protein                                                                               |
| ACD57146 | 9.340519988 | 9.315355647 | 8.793886131 | transcription termination factor Rho                                                                |
| ACD57148 | 10.73345603 | 11.02740152 | 11.41842716 | thioredoxin                                                                                         |
| ACD57155 | 9.581912337 | 9.401496078 | 11.26261168 | YghA protein                                                                                        |
| ACD57156 | 6.824462381 | 6.408766199 | 8.987843816 | NADH dehydrogenase                                                                                  |
| ACD57163 | 7.556168812 | 7.651022981 | 8.595451444 | XopX effector protein                                                                               |
| ACD57167 | 12.78810451 | 12.37754134 | 8.394514142 | hypothetical protein                                                                                |
| ACD57172 | 0           | 9.289809111 | 8.950211767 | hypothetical protein                                                                                |
| ACD57175 | 6.960951828 | 6.898026916 | 5.696500226 | gluconolactonase                                                                                    |
| ACD57176 | 6.671010241 | 6.546937663 | 6.890884396 | conserved hypothetical protein                                                                      |
| ACD57177 | 0           | 0           | 9.285300487 | hypothetical protein                                                                                |
| ACD57184 | 6.132550111 | 5.010793263 | 6.233728953 | hypothetical protein                                                                                |
| ACD57185 | 6.760420568 | 7.129416975 | 6.245727625 | conserved hypothetical protein                                                                      |
| ACD57188 | 9.733179756 | 9.934653605 | 7.876983445 | putative carboxypeptidase                                                                           |
| ACD57189 | 10.3836395  | 10.50193668 | 9.085857481 | anti-sigma F factor antagonist                                                                      |
| ACD57190 | 10.54142578 | 10.93360214 | 7.492750494 | conserved hypothetical protein                                                                      |
| ACD57191 | 7.62399851  | 7.908134384 | 6.470558014 | IcIcG protein                                                                                       |
| ACD57197 | 6.048929287 | 6.450711441 | 4.358086758 | transposase                                                                                         |
| ACD57198 | 4.381324908 | 3.563951273 | 4.182898836 | Tal1, also PthXo7, TAL effector AvrBs3/PthA family                                                  |
| ACD57204 | 8.0361901   | 8.444774722 | 8.964389968 | hypothetical protein                                                                                |
| ACD57210 | 9.785746699 | 10.41108723 | 11.06041223 | conserved hypothetical protein                                                                      |
| ACD57212 | 7.543542282 | 7.462502273 | 8.674372373 | coproporphyrinogen III oxidase, aerobic                                                             |
| ACD57215 | 5.907712698 | 4.841766861 | 5.026494671 | transposase                                                                                         |
| ACD57217 | 7.332108178 | 6.950993232 | 7.06684264  | dihydroxy-acid dehydratase                                                                          |
| ACD57219 | 7.324648615 | 6.955545297 | 8.483106345 | transferase                                                                                         |
| ACD57223 | 6.676352044 | 5.666742392 | 6.158290569 | ISXoo4 transposase                                                                                  |
| ACD57224 | 10.14562651 | 10.43535773 | 10.55977858 | conserved domain protein                                                                            |
| ACD57225 | 6.487741975 | 6.469812733 | 6.44411376  | NAD(P)H steroid dehydrogenase                                                                       |
| ACD57226 | 6.361878873 | 6.423606742 | 5.647176336 | AMP-ligase                                                                                          |
| ACD57229 | 7.28424575  | 6.974357225 | 6.468400851 | haloalkane dehalogenase                                                                             |
| ACD57230 | 7.318136041 | 7.364064598 | 6.441123226 | conserved hypothetical protein                                                                      |
| ACD57231 | 7.01995761  | 6.783103009 | 7.509616675 | methyltransferase                                                                                   |
| ACD57232 | 7.595264942 | 6.8738255   | 7.861093111 | Fic protein family                                                                                  |
| ACD57233 | 7.085275926 | 7.08390476  | 6.876038015 | 3-oxoacyl-synthase III                                                                              |
| ACD57234 | 7.943376346 | 8.528172772 | 9.294758579 | lipoprotein, putative                                                                               |
| ACD57237 | 10.07996471 | 12.22868944 | 9.286472283 | hypothetical protein                                                                                |
| ACD57238 | 7.260242119 | 8.024823852 | 6.712155532 | MFS transporter                                                                                     |
| ACD57239 | 8.705228031 | 9.388036665 | 8.123898944 | conserved hypothetical protein                                                                      |
| ACD57240 | 9.642474148 | 10.75839813 | 8.574525412 | conserved hypothetical protein                                                                      |
| ACD57241 | 6.932510053 | 7.546786447 | 6.59302055  | two-component system regulatory protein                                                             |
| ACD57242 | 6.829862242 | 7.108587181 | 6.828910793 | two-component system sensor protein                                                                 |
| ACD57243 | 7.817546516 | 8.073563198 | 7.15171678  | pyruvate dehydrogenase                                                                              |
| ACD57245 | 7.916948309 | 7.954841888 | 8.122066983 | glycerol-3-phosphate dehydrogenase [NAD(P)+] (NAD(P)H-dependent glycerol-3-phosphate dehydrogenase) |

|          |             |             |             |                                                                                                                       |
|----------|-------------|-------------|-------------|-----------------------------------------------------------------------------------------------------------------------|
| ACD57246 | 9.38178302  | 9.437117438 | 10.9134654  | protein-export chaperone SecB                                                                                         |
| ACD57247 | 8.197634449 | 8.204752081 | 7.997077839 | conserved hypothetical protein                                                                                        |
| ACD57248 | 6.733354341 | 7.46727948  | 7.585954013 | conserved hypothetical protein                                                                                        |
| ACD57249 | 6.992247263 | 6.438756928 | 6.673598822 | thioesterase domain, putative subfamily                                                                               |
| ACD57250 | 9.078649859 | 8.860270699 | 9.977981063 | hypothetical protein                                                                                                  |
| ACD57255 | 5.852348478 | 6.453881335 | 7.978144137 | hypothetical protein                                                                                                  |
| ACD57257 | 6.715316836 | 6.429207533 | 6.425521408 | acriflavin resistance protein                                                                                         |
| ACD57258 | 6.951401292 | 6.653561662 | 6.651166528 | acriflavin resistance protein D                                                                                       |
| ACD57259 | 7.356980091 | 6.925916366 | 7.093919284 | membrane fusion protein                                                                                               |
| ACD57262 | 5.842732497 | 5.464857739 | 6.004040645 | transposase (IS4 family)                                                                                              |
| ACD57266 | 3.45995614  | 3.927375018 | 3.270095321 | IS1112 transposase                                                                                                    |
| ACD57268 | 6.596739888 | 5.281943005 | 5.904308266 | transposase                                                                                                           |
| ACD57269 | 7.463295486 | 7.084648965 | 6.806092011 | conserved hypothetical protein                                                                                        |
| ACD57273 | 5.920493396 | 5.797036331 | 4.642701572 | ISXoo3 transposase ORF B                                                                                              |
| ACD57275 | 6.819527688 | 6.876885247 | 6.838510624 | conserved hypothetical protein                                                                                        |
| ACD57282 | 8.078172161 | 8.54331801  | 7.466047903 | cAMP-regulatory protein                                                                                               |
| ACD57285 | 9.006432681 | 8.981393178 | 9.249390822 | ubiquinone biosynthesis protein                                                                                       |
| PXO_rna0 | 0           | 0           | 0           | XO_rna0 cdna:pseudogene<br>chromosome:GCA_000019585.1:Chromosome:654845:654918:-1<br>gene:PXO_rna0 transcript:PXO_rna |
| PXO_rna1 | 0           | 0           | 0           | XO_rna1 cdna:pseudogene<br>chromosome:GCA_000019585.1:Chromosome:654971:655047:-1<br>gene:PXO_rna1 transcript:PXO_rna |
| ACD57290 | 1.95320563  | 2.152037357 | 0.557424795 | ISXo5 transposase                                                                                                     |
| ACD57291 | 0           | 4.097400107 | 0           | ISXoo3 transposase ORF A                                                                                              |
| ACD57292 | 7.276980461 | 7.385431037 | 9.96699564  | bifunctional PutA protein                                                                                             |
| ACD57299 | 10.65457338 | 11.23452407 | 9.966591968 | putative membrane protein                                                                                             |
| ACD57304 | 6.83852323  | 6.433617153 | 6.87958325  | disulphide-isomerase                                                                                                  |
| ACD57305 | 7.636291095 | 7.733442472 | 6.726463414 | bile acid/sodium symporter                                                                                            |
| ACD57310 | 3.892925258 | 3.464759739 | 4.07288612  | ISXo8 transposase                                                                                                     |
| ACD57311 | 9.621383411 | 0           | 0           | conserved domain protein                                                                                              |
| ACD57312 | 5.905726352 | 6.072943984 | 5.890505061 | conserved hypothetical protein                                                                                        |
| ACD57313 | 6.971520563 | 6.746997938 | 6.574891685 | primosomal protein N'                                                                                                 |
| ACD57316 | 7.762076358 | 7.005310153 | 8.087897706 | conserved hypothetical protein                                                                                        |
| ACD57319 | 9.248076995 | 9.586293749 | 9.508862394 | conserved hypothetical protein                                                                                        |
| ACD57321 | 8.064564943 | 8.379711925 | 7.795383837 | conserved hypothetical protein                                                                                        |
| ACD57322 | 7.462952086 | 7.418468271 | 7.492726464 | conserved hypothetical protein                                                                                        |
| ACD57323 | 6.790224669 | 7.338183708 | 6.600833196 | Sua5/YciO/YrdC family protein                                                                                         |
| ACD57324 | 7.440761221 | 7.707027757 | 8.140829771 | DNA topoisomerase I                                                                                                   |
| ACD57325 | 6.636468018 | 7.030126369 | 6.87115367  | RDD family protein                                                                                                    |
| ACD57326 | 8.083910077 | 8.082420519 | 8.204082012 | fimbrial protein                                                                                                      |
| ACD57327 | 8.106453017 | 8.437506575 | 8.18103793  | smg protein                                                                                                           |
| ACD57328 | 6.52433798  | 6.485397844 | 5.889544118 | DNA protecting protein DprA                                                                                           |
| ACD57329 | 10.60933575 | 11.30143903 | 10.01938223 | LysM domain protein                                                                                                   |
| ACD57335 | 7.531529622 | 7.488306122 | 7.811785687 | lipopolysaccharide core biosynthesis glycosyl transferase                                                             |
| ACD57337 | 10.78208907 | 11.45919593 | 10.05403445 | hypothetical protein                                                                                                  |
| ACD57338 | 7.00299499  | 6.80308493  | 6.830698998 | bacterial membrane flanked domain family                                                                              |
| ACD57339 | 6.718169802 | 6.477991345 | 5.729215577 | bacterial membrane flanked domain family                                                                              |
| ACD57340 | 6.99317617  | 7.324351589 | 7.830464502 | riboflavin biosynthesis protein                                                                                       |
| ACD57342 | 7.089932402 | 7.067466629 | 6.767535628 | lipid A biosynthesis lauroyl acyltransferase                                                                          |
| ACD57346 | 10.9575374  | 11.42180712 | 11.00386923 | hypothetical protein                                                                                                  |
| ACD57347 | 7.248980676 | 7.196685723 | 8.000743698 | site-specific recombinase, phage integrase family                                                                     |
| ACD57348 | 0           | 0           | 6.778602845 | conserved hypothetical protein                                                                                        |
| ACD57349 | 7.200996661 | 6.170904499 | 7.366304727 | conserved hypothetical protein                                                                                        |
| ACD57350 | 8.811965459 | 10.03691538 | 9.125343723 | hypothetical protein                                                                                                  |
| ACD57351 | 0           | 0           | 8.943297219 | conserved hypothetical protein                                                                                        |
| ACD57352 | 0           | 9.215882408 | 8.362833673 | conserved hypothetical protein                                                                                        |
| ACD57364 | 7.572836627 | 7.252286971 | 6.458150658 | conserved hypothetical protein                                                                                        |
| ACD57365 | 6.331251975 | 6.344235535 | 5.933506545 | OmpA family protein                                                                                                   |
| ACD57366 | 7.03411665  | 6.61636799  | 6.658025777 | conserved hypothetical protein                                                                                        |
| ACD57367 | 6.822296765 | 6.774549885 | 6.38097701  | conserved hypothetical protein                                                                                        |
| ACD57369 | 9.405700984 | 10.01530354 | 10.33168954 | hypothetical protein                                                                                                  |
| ACD57370 | 9.546892531 | 10.10771402 | 10.0152896  | conserved hypothetical protein                                                                                        |
| ACD57371 | 10.52158081 | 10.55683173 | 9.567324877 | conserved hypothetical protein                                                                                        |
| ACD57373 | 6.862922459 | 7.347320176 | 6.943229811 | DNA primase                                                                                                           |

|          |             |             |             |                                                                          |
|----------|-------------|-------------|-------------|--------------------------------------------------------------------------|
| ACD57374 | 8.264466058 | 8.423347059 | 6.739834604 | ribonuclease BN                                                          |
| ACD57378 | 7.744786756 | 7.603025406 | 7.96891442  | GatB/Yqey                                                                |
| ACD57379 | 11.08351922 | 12.08039118 | 12.63289526 | ribosomal protein S21                                                    |
| ACD57385 | 4.887042667 | 5.223851124 | 5.986069563 | transposase                                                              |
| ACD57386 | 4.063036925 | 5.021062138 | 5.874206786 | ISXo2 putative transposase                                               |
| ACD57387 | 6.964537257 | 7.787647944 | 8.287195225 | transposase                                                              |
| ACD57388 | 8.520265084 | 8.147026803 | 7.073102562 | dehydrogenase                                                            |
| ACD57390 | 9.966822651 | 10.03891899 | 7.910522813 | conserved hypothetical protein                                           |
| ACD57391 | 8.674188736 | 8.697044004 | 8.004967609 | conserved hypothetical protein                                           |
| ACD57396 | 7.331069204 | 7.011674533 | 6.236262993 | cationic amino acid transporter                                          |
| ACD57397 | 7.366811773 | 7.313254923 | 6.933490021 | conserved hypothetical protein                                           |
| ACD57400 | 2.785542182 | 1.394925655 | 3.185084742 | hypothetical protein                                                     |
| ACD57402 | 6.86318272  | 5.989806599 | 5.640811779 | chloromuconate cycloisomerase                                            |
| ACD57403 | 6.520750668 | 6.500563071 | 5.783807594 | NlpC/P60 family protein                                                  |
| ACD57414 | 6.741547883 | 6.423993239 | 7.183744541 | glycosyltransferase                                                      |
| ACD57419 | 7.580899204 | 7.056897783 | 6.164794322 | conserved hypothetical protein                                           |
| ACD57420 | 7.000698636 | 6.797583715 | 6.627544098 | 3-ketoacyl-CoA thiolase                                                  |
| ACD57423 | 7.252684353 | 7.215164089 | 6.99859043  | variant SH3 domain protein                                               |
| ACD57424 | 6.798789305 | 6.909437108 | 6.277743038 | 2-oxoacid dehydrogenase E1 component, beta subunit                       |
| ACD57425 | 4.273993228 | 2.875290564 | 2.548860739 | ISXo5 transposase                                                        |
| ACD57426 | 6.361129671 | 6.7740886   | 6.587057395 | 2-oxoacid dehydrogenase E1 component, beta subunit                       |
| ACD57427 | 6.518288059 | 6.335063366 | 5.758127254 | pyruvate dehydrogenase E1 component, alpha subunit                       |
| ACD57428 | 5.749882832 | 5.737624575 | 6.726299915 | nuclease                                                                 |
| ACD57432 | 6.382644775 | 7.116770208 | 6.96176222  | transcriptional regulator MarR/emrR family                               |
| ACD57435 | 8.404554052 | 8.106636218 | 6.30534495  | Na <sup>+</sup> /H <sup>+</sup> antiporter subunit                       |
| ACD57436 | 8.469633678 | 7.092038257 | 6.901023745 | PhaF                                                                     |
| ACD57437 | 7.733225523 | 7.695353586 | 6.910840572 | PhaE                                                                     |
| ACD57438 | 7.144454314 | 7.070432265 | 5.788753564 | PhaD                                                                     |
| ACD57439 | 7.077926579 | 7.389790495 | 7.058316496 | PhaC                                                                     |
| ACD57440 | 7.01664117  | 7.247044542 | 6.072716801 | NADH dehydrogenase subunit 5                                             |
| ACD57442 | 9.001340632 | 8.771159296 | 7.533010396 | conserved hypothetical protein                                           |
| ACD57443 | 6.314769021 | 6.893277258 | 7.100935611 | zinc metalloprotease                                                     |
| ACD57444 | 6.669650438 | 5.973850021 | 6.099987347 | neutral protease A                                                       |
| ACD57445 | 7.643488256 | 6.740914072 | 6.403739794 | zinc metalloprotease                                                     |
| ACD57446 | 7.056323404 | 7.008775948 | 6.779075825 | lytic enzyme                                                             |
| ACD57449 | 7.359670506 | 7.051176307 | 6.912949198 | phosphoribosylaminoimidazole-succinocarboxamide synthase                 |
| ACD57460 | 6.555909694 | 6.211545705 | 6.145475708 | oxidoreductase                                                           |
| ACD57461 | 8.028668599 | 7.54690989  | 8.148161316 | conserved hypothetical protein                                           |
| ACD57462 | 7.092947374 | 6.672481917 | 7.072427412 | dipeptidyl peptidase IV                                                  |
| ACD57466 | 6.759115877 | 6.295588959 | 6.283564387 | lipoprotein, putative                                                    |
| ACD57468 | 7.083862222 | 7.039324862 | 5.990178863 | conserved hypothetical protein                                           |
| ACD57470 | 8.017866247 | 7.883730774 | 7.663017215 | cellulase                                                                |
| ACD57471 | 11.60126938 | 9.585174757 | 10.5908677  | hypothetical protein                                                     |
| ACD57472 | 10.41856947 | 10.46287031 | 11.58399944 | exoglucanase A                                                           |
| ACD57473 | 12.60805841 | 12.62351574 | 12.85580871 | hypothetical protein                                                     |
| ACD57474 | 0           | 0           | 0           | hypothetical protein                                                     |
| ACD57476 | 8.892227074 | 9.404996761 | 9.563146688 | conserved hypothetical protein                                           |
| ACD57478 | 7.781982561 | 7.330665953 | 7.224840992 | conserved hypothetical protein                                           |
| ACD57479 | 7.990172054 | 5.779855904 | 7.75557529  | conserved hypothetical protein                                           |
| ACD57482 | 0           | 0           | 0           | ISXo8 transposase                                                        |
| ACD57483 | 7.184746437 | 7.251586555 | 7.255387428 | trehalase                                                                |
| ACD57485 | 6.958610712 | 6.742774258 | 5.659935972 | protein of unknown function                                              |
| ACD57491 | 9.878523046 | 11.10589542 | 9.268698717 | hypothetical protein                                                     |
| ACD57493 | 6.981795584 | 7.101303394 | 7.232775861 | histidine kinase-response regulator hybrid protein                       |
| ACD57494 | 6.486194665 | 6.3407118   | 6.618839164 | zinc protease                                                            |
| ACD57496 | 10.3007415  | 12.43567807 | 12.36684674 | hypothetical protein                                                     |
| ACD57497 | 7.430017587 | 8.694887156 | 7.770796017 | conserved domain protein                                                 |
| ACD57499 | 7.661101119 | 8.775383119 | 8.156634255 | histidine kinase, hamp region\x3abacterial chemotaxis sensory transducer |
| ACD57500 | 9.515506678 | 10.1708264  | 11.18558164 | major extracellular endoglucanase                                        |
| ACD57509 | 7.49111553  | 7.152974331 | 6.98753689  | transposase                                                              |
| ACD57510 | 10.59346582 | 11.26947153 | 10.64689167 | hypothetical protein                                                     |
| ACD57516 | 8.006011836 | 7.884713908 | 9.714722902 | protein of unknown function                                              |
| ACD57518 | 9.521645585 | 9.653224863 | 9.994975642 | outer membrane lipoprotein                                               |
| ACD57523 | 8.6921726   | 8.96188374  | 7.493959496 | aminotransferase                                                         |

|          |             |             |             |                                                            |
|----------|-------------|-------------|-------------|------------------------------------------------------------|
| ACD57524 | 10.03945373 | 9.796931889 | 9.174438878 | hypothetical protein                                       |
| ACD57531 | 6.764725656 | 6.421127341 | 7.958071253 | hypothetical protein                                       |
| ACD57534 | 7.468860231 | 6.86810643  | 6.787954783 | HAD-superfamily hydrolase subfamily IA, variant 1 and 3    |
| ACD57535 | 7.250222609 | 7.787112451 | 7.594421651 | lipoprotein, putative                                      |
| ACD57536 | 7.484919541 | 7.867136626 | 8.00851266  | aminopeptidase                                             |
| ACD57538 | 7.641806107 | 7.774622359 | 6.408682993 | Putative signal protein with HAMP and GGDEF domains        |
| ACD57539 | 7.440229673 | 7.586044116 | 7.501797386 | ubiquinone/menaquinone biosynthesis methyltransferase UbiE |
| ACD57546 | 7.907473567 | 7.429113779 | 7.883962878 | sugar kinase                                               |
| ACD57561 | 8.134292826 | 8.362842438 | 8.908530729 | hypothetical protein                                       |
| ACD57568 | 7.804105201 | 7.53459859  | 7.55086989  | endonuclease/exonuclease/phosphatase family                |
| ACD57579 | 7.125960997 | 6.999131868 | 6.533848308 | oxidoreductase YvaA                                        |
| ACD57585 | 6.343288777 | 6.750164304 | 6.679142258 | pteridine reductase 1                                      |
| ACD57587 | 7.309985584 | 7.023166623 | 6.582298571 | ISXoo3 transposase ORF B                                   |
| ACD57589 | 0           | 6.394325493 | 3.862739009 | transposase                                                |
| ACD57591 | 8.119288731 | 7.777551222 | 7.212569339 | hypothetical protein                                       |
| ACD57596 | 10.88054779 | 8.546898317 | 11.62786671 | hypothetical protein                                       |
| ACD57601 | 8.156770753 | 8.505402699 | 7.208322161 | conserved hypothetical protein                             |
| ACD57602 | 8.602928936 | 8.572696437 | 7.804731212 | biofilm PGA synthesis N-glycosyltransferase PgaC           |
| ACD57603 | 8.120326018 | 7.733706836 | 7.277873194 | biofilm PGA synthesis lipoprotein PgaB                     |
| ACD57604 | 7.899223977 | 7.771918583 | 7.26425492  | HmsH                                                       |
| ACD57606 | 0           | 0           | 0           | ISXo5 transposase                                          |
| ACD57608 | 10.5758701  | 10.27065742 | 10.36587403 | hypothetical protein                                       |
| ACD57612 | 7.082127747 | 6.767389962 | 6.108869408 | tRNA nucleotidyltransferase                                |
| ACD57616 | 1.171328542 | 1.816214663 | 3.129845146 | ISXo8 transposase                                          |
| ACD57617 | 7.63382351  | 7.208400204 | 6.905362935 | isrso16-transposase orfa protein                           |
| ACD57618 | 7.25500968  | 7.138148903 | 6.715838472 | putative cystathionine gamma-synthase protein              |
| ACD57619 | 3.285134371 | 2.896647734 | 4.469202227 | ISXo2 putative transposase                                 |
| ACD57620 | 8.181206932 | 7.968591921 | 7.909791102 | ISXo6 transposase                                          |
| ACD57623 | 9.866632935 | 10.1284455  | 10.99215236 | high-affinity choline transport                            |
| ACD57624 | 7.522487375 | 6.984464032 | 6.822564458 | high-affinity choline transport                            |
| ACD57625 | 7.177628826 | 6.913092856 | 6.649989017 | endonuclease/exonuclease/phosphatase                       |
| ACD57626 | 7.358835784 | 7.653138859 | 7.610655774 | thio x3adisulfide interchange protein                      |
| ACD57627 | 7.17028563  | 7.058457208 | 7.412171807 | disulfide oxidoreductase                                   |
| ACD57628 | 7.561700358 | 7.900595145 | 6.227671773 | cytochrome C4                                              |
| ACD57631 | 7.458390207 | 8.574847041 | 8.504362178 | conserved mebrane associated protein                       |
| ACD57634 | 7.383963436 | 6.388458209 | 5.986581591 | two-component system sensor protein                        |
| ACD57635 | 0           | 0           | 0           | two-component system regulatory protein, EnvZ family       |
| ACD57637 | 8.944015066 | 9.243535802 | 7.771013995 | conserved hypothetical protein                             |
| ACD57639 | 8.313835364 | 8.259507895 | 7.531654377 | two-component system sensor protein                        |
| ACD57640 | 8.560795187 | 8.712987764 | 8.443909115 | two-component system regulatory protein                    |
| ACD57643 | 8.762202625 | 8.047582011 | 8.09154646  | hypothetical protein                                       |
| ACD57646 | 8.338045506 | 6.978904902 | 9.410160875 | hypothetical protein                                       |
| ACD57652 | 7.963612838 | 5.389604668 | 7.475311908 | conserved hypothetical protein                             |
| ACD57653 | 8.636323726 | 8.515132109 | 9.852835338 | ABC transporter ATP-binding protein                        |
| ACD57655 | 9.113229059 | 8.524400671 | 9.575662145 | hypothetical protein                                       |
| ACD57662 | 7.177917792 | 7.877909856 | 7.694775747 | conserved hypothetical protein                             |
| ACD57672 | 7.029684776 | 6.006257624 | 7.399111265 | hypothetical protein                                       |
| ACD57680 | 6.29303935  | 6.568284494 | 5.925377597 | D-lactate dehydrogenase                                    |
| ACD57681 | 7.312084262 | 7.043453875 | 6.680591602 | inner membrane protein Ybcl                                |
| ACD57682 | 7.852092499 | 8.041100581 | 7.888091758 | conserved hypothetical protein                             |
| ACD57683 | 6.089648565 | 6.485856673 | 6.675180802 | LppC superfamily                                           |
| ACD57685 | 7.114075458 | 6.719977416 | 6.752654942 | conserved hypothetical protein                             |
| ACD57701 | 8.537459153 | 9.035513944 | 8.066288355 | conserved hypothetical protein                             |
| ACD57707 | 7.607123143 | 8.129952684 | 7.598581081 | conserved hypothetical protein                             |
| ACD57708 | 8.482287646 | 8.232516864 | 8.241630474 | conserved hypothetical protein                             |
| ACD57709 | 6.864173761 | 6.666628788 | 7.192450639 | 5,10-methylenetetrahydrofolate reductase                   |
| ACD57712 | 8.873757842 | 9.090239477 | 7.987531206 | glyoxalase/bleomycin resistance protein/dioxygenase        |
| ACD57714 | 10.16874732 | 11.52042716 | 9.983136126 | conserved hypothetical protein                             |
| ACD57716 | 7.537606691 | 6.51949001  | 8.207448772 | hypothetical protein                                       |
| ACD57720 | 11.01233122 | 12.01689532 | 9.634094061 | hypothetical protein                                       |
| ACD57723 | 8.370482538 | 8.28686729  | 9.011545955 | adenosylhomocysteinase                                     |
| ACD57727 | 10.23005647 | 9.018901183 | 11.60297717 | conserved hypothetical protein                             |
| ACD57729 | 5.598064414 | 5.607256327 | 4.843054232 | ISXo8 transposase                                          |
| ACD57732 | 8.14973188  | 8.200991758 | 8.863656647 | S-adenosylmethionine synthetase                            |

|          |             |             |              |                                                               |
|----------|-------------|-------------|--------------|---------------------------------------------------------------|
| ACD57735 | 5.902249684 | 4.008235876 | -5.381585412 | methyltransferase                                             |
| ACD57736 | 3.983340236 | 0           | 3.061631057  | tRNA-dihydrouridine synthase B                                |
| ACD57738 | 6.752092915 | 5.981770472 | 7.242183278  | putative secreted protein                                     |
| ACD57739 | 7.337398903 | 7.694727003 | 8.230668962  | ribokinase                                                    |
| ACD57740 | 6.884756638 | 7.048530468 | 5.996488177  | nucleoside transporter                                        |
| ACD57743 | 6.157342893 | 6.693556651 | 6.460347767  | ISXo8 transposase                                             |
| ACD57744 | 9.018931775 | 7.941393929 | 9.389003149  | hypothetical protein                                          |
| ACD57748 | 9.216983459 | 8.471524841 | 8.450967894  | transmembrane signal peptide protein                          |
| ACD57749 | 10.45649816 | 10.10050466 | 9.582461918  | ABC transporter permease                                      |
| ACD57750 | 7.777616971 | 7.573154845 | 6.418621747  | permease                                                      |
| ACD57751 | 7.29259772  | 6.72902247  | 6.685407587  | taurine dioxygenase                                           |
| ACD57752 | 7.158377425 | 6.879129847 | 6.332505656  | oxidoreductase                                                |
| ACD57753 | 6.489197698 | 6.936378819 | 6.8483976    | ABC transporter ATP-binding protein                           |
| ACD57757 | 7.207160779 | 6.709924709 | 7.207404845  | ISXoo8 transposase                                            |
| ACD57758 | 12.55734164 | 11.07645488 | 11.99982036  | conserved hypothetical protein                                |
| ACD57759 | 7.050741111 | 7.22318118  | 6.398001421  | conserved hypothetical protein                                |
| ACD57768 | 7.585563498 | 6.973163521 | 6.359819827  | bis(5'-nucleosyl)-tetrphosphatase (symmetrical)               |
| ACD57769 | 7.183814002 | 7.444103818 | 6.681603872  | ApaG protein                                                  |
| ACD57770 | 8.174925683 | 8.052366983 | 7.95419631   | dimethyladenosine transferase                                 |
| ACD57771 | 7.146940279 | 7.25124569  | 6.18549988   | 4-hydroxythreonine-4-phosphate dehydrogenase                  |
| ACD57772 | 8.719867928 | 9.164283467 | 8.448859665  | peptidyl-prolyl cis-trans isomerase                           |
| ACD57773 | 8.661289992 | 8.903854738 | 9.124113555  | organic solvent tolerance protein                             |
| ACD57774 | 7.157801654 | 7.138107936 | 6.515072169  | acetoin utilization family protein                            |
| ACD57775 | 8.293549817 | 8.855189293 | 8.632319116  | ATP <sub>x</sub> 3acob(l)alamin adenosyltransferase, putative |
| ACD57776 | 8.712637047 | 9.204040428 | 8.741632145  | conserved hypothetical protein                                |
| ACD57782 | 8.805624583 | 8.973060173 | 9.257677767  | VanR                                                          |
| ACD57786 | 6.75966186  | 6.571582771 | 5.918806005  | acid-CoA ligase                                               |
| ACD57787 | 6.324452405 | 6.418151147 | 5.666875865  | aldehyde dehydrogenase                                        |
| ACD57788 | 7.4852497   | 7.673224261 | 7.553391225  | P-hydroxycinnamoyl CoA hydratase                              |
| ACD57789 | 7.17173725  | 7.475068666 | 6.385339572  | transcriptional regulator MarR family                         |
| ACD57790 | 8.281276321 | 8.098353231 | 8.273455279  | conserved hypothetical protein                                |
| ACD57791 | 7.564179983 | 7.711377889 | 7.481153605  | conserved hypothetical protein                                |
| ACD57792 | 7.360531083 | 7.199593829 | 7.196813567  | gluconolactonase                                              |
| ACD57794 | 6.72222009  | 6.390573112 | 5.852273562  | conserved hypothetical protein                                |
| ACD57795 | 6.523005157 | 6.880477382 | 6.553977879  | cytidine and deoxycytidylate deaminase zinc-binding region    |
| ACD57796 | 8.946488169 | 8.465876541 | 8.454648871  | conserved hypothetical protein                                |
| ACD57797 | 6.911955173 | 6.872077673 | 6.102002976  | integral membrane protein                                     |
| ACD57803 | 8.922495207 | 6.968332717 | 7.699544692  | hypothetical protein                                          |
| ACD57804 | 7.115158125 | 6.893070924 | 6.90408664   | glutaminyl-tRNA synthetase                                    |
| ACD57808 | 7.107572801 | 6.141876208 | 6.041196977  | two-component system regulatory protein                       |
| ACD57809 | 6.541305743 | 6.627504702 | 5.864364458  | two-component system sensor protein                           |
| ACD57810 | 0           | 0           | 0            | transposase                                                   |
| ACD57813 | 0           | 0           | 0            | two-component system sensor protein                           |
| ACD57814 | 7.428544424 | 7.041889088 | 8.265183697  | two-component system regulatory protein                       |
| ACD57817 | 5.75360721  | 6.808475152 | 6.086964177  | DJ-1/PfpI family                                              |
| ACD57818 | 0.803317977 | 0           | 1.337779586  | ISXo8 transposase                                             |
| ACD57820 | 6.550225013 | 7.484371793 | 8.18968127   | ISXo8 transposase                                             |
| ACD57821 | 7.888158748 | 7.600492778 | 8.828507823  | transaldolase superfamily                                     |
| ACD57822 | 7.518220381 | 7.403216586 | 8.541681321  | regulator of nucleoside diphosphate kinase                    |
| ACD57823 | 7.444658785 | 7.629924843 | 6.887768949  | oxidative stress transcriptional regulator                    |
| ACD57824 | 7.821659199 | 7.928932841 | 7.415209373  | alkyl hydroperoxide reductase subunit F                       |
| ACD57825 | 9.264060177 | 9.670142806 | 10.55165059  | alkyl hydroperoxide reductase subunit C                       |
| ACD57831 | 7.173976886 | 6.971830915 | 5.873380128  | N-formylglutamate amidohydrolase                              |
| ACD57832 | 8.082856906 | 7.23628213  | 7.039357765  | nudix hydrolase family protein                                |
| ACD57833 | 7.533578921 | 7.39149279  | 6.848497755  | exodeoxyribonuclease IX                                       |
| ACD57834 | 7.0431148   | 7.502577247 | 7.577285307  | nitroreductase family                                         |
| ACD57838 | 8.209857848 | 8.484158276 | 10.41296143  | putative secreted protein                                     |
| ACD57839 | 5.617251458 | 6.674149887 | 7.036821993  | conserved hypothetical protein                                |
| ACD57840 | 8.104656408 | 8.473174026 | 9.310578702  | ECF sigma factor                                              |
| ACD57843 | 0           | 0           | 0            | putative transposase                                          |
| ACD57844 | 8.813178339 | 9.283199503 | 8.481008255  | conserved hypothetical protein                                |
| ACD57850 | 7.413814071 | 7.673718944 | 6.696411199  | YbaK/epsC protein                                             |
| ACD57851 | 7.752654942 | 7.649866903 | 7.016741443  | asparaginase                                                  |
| ACD57853 | 10.35634192 | 10.37073099 | 9.62021066   | hypothetical protein                                          |

|          |             |              |             |                                                                                                             |
|----------|-------------|--------------|-------------|-------------------------------------------------------------------------------------------------------------|
| ACD57854 | 7.690291371 | 8.080140648  | 8.28318561  | tryptophan repressor binding protein                                                                        |
| ACD57859 | 7.464619262 | 7.280863545  | 7.899683192 | transcriptional regulator                                                                                   |
| ACD57860 | 8.218970015 | 7.990523802  | 7.898117637 | molybdenum cofactor biosynthesis protein B                                                                  |
| ACD57861 | 7.139981027 | 7.127323744  | 6.466193137 | tetratricopeptide repeat domain protein                                                                     |
| ACD57862 | 6.914002356 | 6.627497406  | 6.491420223 | peptide chain release factor 1                                                                              |
| ACD57863 | 7.458792101 | 7.413010103  | 8.016852849 | glutamyl-tRNA reductase                                                                                     |
| ACD57884 | 6.244245846 | 7.791214994  | 7.573957655 | ISxac3 transposase                                                                                          |
| ACD57913 | 6.007202223 | 6.100506761  | 7.457873322 | ISXoo2 transposase                                                                                          |
| ACD57920 | 8.821541219 | 5.66443164   | 8.321098307 | hypothetical protein                                                                                        |
| ACD57921 | 6.395636952 | 6.073972291  | 6.421541431 | conserved hypothetical protein                                                                              |
| ACD57922 | 7.196420165 | 6.525606938  | 7.096251309 | conserved hypothetical protein                                                                              |
| ACD57923 | 5.93696766  | 6.125861837  | 6.383985893 | conserved hypothetical protein                                                                              |
| ACD57924 | 7.542018097 | 8.232267415  | 7.981327526 | conserved hypothetical protein                                                                              |
| ACD57925 | 7.499224039 | 5.951911787  | 7.598543864 | hypothetical protein                                                                                        |
| ACD57926 | 7.374439632 | 7.13154833   | 7.992298255 | glycine dehydrogenase                                                                                       |
| ACD57927 | 8.56817655  | 8.791726179  | 9.510293411 | hypothetical protein                                                                                        |
| ACD57932 | 6.380641147 | 6.546521008  | 6.332738362 | angiotensin-converting enzyme, testis-specific isoform (ACE-T) (Dipeptidyl carboxypeptidase I)(Kininase II) |
| ACD57933 | 8.047751035 | 8.143969867  | 7.59724809  | inner membrane protein                                                                                      |
| ACD57934 | 8.726460008 | 9.28503225   | 8.280914569 | transmembrane protein                                                                                       |
| ACD57935 | 7.577043554 | 7.385405151  | 6.102332691 | dolichyl-phosphate-mannose-protein mannosyltransferase                                                      |
| ACD57938 | 10.67484548 | 0            | 9.513865741 | hypothetical protein                                                                                        |
| ACD57939 | 7.520846508 | 6.712293124  | 6.063056345 | conserved hypothetical protein                                                                              |
| ACD57940 | 9.909180558 | 9.873933131  | 9.149371157 | cell division topological specificity factor MinE                                                           |
| ACD57941 | 8.104525372 | 8.226720449  | 8.043749134 | septum site-determining protein MinD                                                                        |
| ACD57942 | 7.517559164 | 7.826891643  | 8.273646428 | septum site-determining protein MinC                                                                        |
| ACD57943 | 8.724268267 | 9.115046252  | 9.164668133 | acetyltransferase, gnat family                                                                              |
| ACD57944 | 9.739100442 | 0            | 9.769333721 | hypothetical protein                                                                                        |
| ACD57950 | 6.761232076 | 7.43345191   | 7.305633148 | D-alanyl-D-alanine carboxypeptidase family                                                                  |
| ACD57951 | 10.06548345 | 9.151366702  | 9.59462319  | conserved hypothetical protein                                                                              |
| ACD57952 | 8.917052771 | 8.583101577  | 8.023549229 | conserved hypothetical protein                                                                              |
| ACD57953 | 8.343345636 | 8.329863595  | 8.091028042 | spfH domain/band 7 family protein                                                                           |
| ACD57955 | 8.573431335 | 8.595235099  | 8.292997953 | transposase                                                                                                 |
| ACD57957 | 10.35484441 | 10.53868365  | 10.47690818 | conserved hypothetical protein                                                                              |
| ACD57964 | 6.59119768  | 7.126250172  | 7.299702572 | ImpA, N-terminal                                                                                            |
| ACD57967 | 0           | 0            | 0           | lipoprotein, putative                                                                                       |
| ACD57969 | 5.731039291 | 5.546622868  | 7.070872292 | similar to Sulfatase modifying factor 1 precursor (C-alpha-formylglycine-generating enzyme 1)               |
| ACD57972 | 0           | 0            | 0           | lipoprotein, putative                                                                                       |
| ACD57976 | 7.313944171 | 7.501415259  | 9.760189337 | lipoprotein, putative                                                                                       |
| ACD57986 | 0           | 0            | 0           | ISXo8 transposase                                                                                           |
| ACD57988 | 6.126638402 | 5.543529909  | 6.065255632 | RhsD protein                                                                                                |
| ACD57989 | 0           | -0.000943831 | 0           | ISXo8 transposase                                                                                           |
| ACD57993 | 12.20075151 | 11.72787792  | 10.78366127 | hypothetical protein                                                                                        |
| ACD57994 | 8.344118335 | 9.141458337  | 8.83942427  | conserved hypothetical protein                                                                              |
| ACD57995 | 6.207389226 | 6.214103429  | 5.70395616  | pirin, N-terminal/x3aPirin, C-terminal                                                                      |
| ACD57996 | 7.595220178 | 8.061311782  | 7.476827195 | endonuclease V                                                                                              |
| ACD58003 | 6.929282083 | 7.986723789  | 6.09741275  | chemotaxis response regulator protein-glutamate methylesterase group 2 operon                               |
| ACD58004 | 7.717498217 | 8.665854626  | 7.155718879 | CheR methyltransferase, SAM binding domain                                                                  |
| ACD58005 | 7.578750064 | 8.785171258  | 6.583851498 | Response regulator with EAL domain                                                                          |
| ACD58006 | 9.413469266 | 10.47548013  | 9.101203577 | chemotaxis protein                                                                                          |
| ACD58007 | 8.609441022 | 9.590122918  | 8.759485437 | chemotaxis protein                                                                                          |
| ACD58010 | 7.931718509 | 9.088385447  | 7.745163367 | stas domain, putative                                                                                       |
| ACD58011 | 6.834900792 | 6.888451028  | 6.316457134 | transcription-repair coupling factor                                                                        |
| ACD58012 | 6.950608384 | 6.882838656  | 7.569764488 | N-acetyltransferase family protein                                                                          |
| ACD58013 | 6.307758194 | 6.810635896  | 6.492120772 | conserved hypothetical protein                                                                              |
| ACD58016 | 2.013237128 | 0.008486889  | 1.350435012 | ISXo8 transposase                                                                                           |
| ACD58017 | 8.430030136 | 8.353517378  | 8.419050045 | cysteine protease                                                                                           |
| ACD58025 | 7.284884235 | 7.857508311  | 8.129143893 | ISXoo2 transposase                                                                                          |
| ACD58026 | 9.905283199 | 10.69372216  | 9.123138497 | cysteine protease                                                                                           |
| ACD58037 | 7.526522713 | 7.142055988  | 7.308475556 | transposase                                                                                                 |
| ACD58039 | 9.510509029 | 7.843142194  | 9.547764058 | transposase                                                                                                 |
| ACD58040 | 7.834951342 | 8.000298652  | 7.40730176  | conserved hypothetical protein                                                                              |
| ACD58042 | 7.450683401 | 8.57534637   | 10.74977727 | peptidoglycan-associated outer membrane lipoprotein                                                         |

|          |             |             |             |                                                                    |
|----------|-------------|-------------|-------------|--------------------------------------------------------------------|
| ACD58043 | 7.032552717 | 6.414981143 | 6.665719637 | conserved hypothetical protein                                     |
| ACD58045 | 8.152619488 | 8.197010228 | 7.745069223 | putative deoxyribonuclease YjjV                                    |
| ACD58046 | 9.60554804  | 9.75976837  | 9.335879359 | conserved hypothetical protein                                     |
| ACD58064 | 8.973364453 | 7.379335042 | 9.239080546 | hypothetical protein                                               |
| ACD58065 | 6.793817869 | 6.700841952 | 5.766857494 | TonB-dependent receptor                                            |
| ACD58066 | 6.41580936  | 6.075628893 | 5.415004813 | TonB-dependent outer membrane Receptor                             |
| ACD58067 | 9.195970079 | 8.152528229 | 7.368235794 | conserved domain protein                                           |
| ACD58070 | 7.248762516 | 7.339787663 | 7.346141377 | alcohol dehydrogenase                                              |
| ACD58071 | 6.972175672 | 6.988400664 | 6.532795388 | chloride channel                                                   |
| ACD58072 | 6.517385939 | 6.070996764 | 5.927555171 | type I phosphodiesterase/nucleotide pyrophosphatase family protein |
| ACD58074 | 7.780953079 | 7.979590964 | 7.914193757 | 6-O-methylguanine-DNA methyltransferase                            |
| ACD58075 | 6.451303441 | 6.063884706 | 6.29525466  | DNA methylation and regulatory protein                             |
| ACD58081 | 8.418286945 | 7.878099973 | 7.905723946 | conserved hypothetical protein                                     |
| ACD58082 | 9.029140879 | 8.913565628 | 10.48062866 | conserved hypothetical protein                                     |
| ACD58083 | 6.020093221 | 6.412110821 | 5.967551369 | conserved hypothetical protein                                     |
| ACD58084 | 6.562897213 | 8.618998426 | 7.362198087 | RNA polymerase ECF-type sigma factor                               |
| ACD58085 | 8.848992173 | 0           | 0           | conserved domain protein                                           |
| ACD58090 | 7.452900137 | 7.343603248 | 7.228203009 | integral membrane protein DUF6                                     |
| ACD58091 | 6.727185309 | 6.470331867 | 6.161724463 | DUF72                                                              |
| ACD58092 | 9.229933943 | 8.518212511 | 7.991283739 | conserved hypothetical protein                                     |
| ACD58097 | 6.649888453 | 6.427713432 | 6.040653569 | two-component system sensor protein                                |
| ACD58098 | 6.867427018 | 6.626574931 | 6.2732697   | two-component system regulatory protein                            |
| ACD58106 | 0           | 0           | 6.377909797 | ISXoo12 transposase                                                |
| ACD58108 | 0           | 0           | 5.86273653  | transposase                                                        |
| ACD58109 | 2.915966356 | 2.793723206 | 2.078824993 | ISXo8 transposase                                                  |
| ACD58117 | 0           | 0.010493419 | 0           | ISXo8 transposase                                                  |
| ACD58119 | 7.943862736 | 7.758776197 | 7.319473426 | dephospho-CoA kinase                                               |
| ACD58120 | 8.070909849 | 8.368624317 | 6.579712671 | type IV prepilin peptidase                                         |
| ACD58121 | 8.590658154 | 9.045877038 | 8.481468482 | pilin biogenesis protein                                           |
| ACD58127 | 9.272702093 | 9.84898748  | 9.252566096 | hypothetical protein                                               |
| ACD58128 | 10.50861682 | 10.93610051 | 11.76181299 | hypothetical protein                                               |
| ACD58129 | 7.025438593 | 7.259592632 | 6.603522497 | two-component system regulatory protein                            |
| ACD58130 | 0           | 10.66810494 | 10.56737622 | hypothetical protein                                               |
| ACD58131 | 6.444088906 | 6.020017636 | 5.490765856 | two-component system sensor protein                                |
| ACD58137 | 8.553890357 | 8.112350883 | 8.726531532 | competence lipoprotein                                             |
| ACD58142 | 9.981053471 | 0           | 0           | hypothetical protein                                               |
| ACD58143 | 7.995133978 | 7.959457197 | 6.991011569 | alpha, alpha-trehalose-phosphate synthase                          |
| ACD58144 | 8.015755126 | 7.795312398 | 7.372046648 | glycosyl hydrolase, family 15                                      |
| ACD58145 | 7.961901099 | 7.87296416  | 8.108294444 | trehalose-phosphatase                                              |
| ACD58146 | 8.471508584 | 8.446165231 | 7.1476832   | hypothetical protein                                               |
| ACD58147 | 9.915849509 | 9.827207718 | 9.85417803  | TonB-dependent outer membrane Receptor                             |
| ACD58149 | 8.473027869 | 8.732421847 | 8.796169429 | conserved hypothetical protein                                     |
| ACD58152 | 7.062888026 | 6.75281548  | 7.680999407 | phytase                                                            |
| ACD58153 | 6.806349838 | 6.913044971 | 6.727171692 | putative arginyl-tRNA--protein transferase                         |
| ACD58155 | 9.958135071 | 10.08192277 | 10.69176096 | conserved hypothetical protein                                     |
| ACD58156 | 6.9013255   | 6.458716652 | 6.393356133 | RNA polymerase sigma factor                                        |
| ACD58157 | 7.765010879 | 8.185341293 | 8.261220505 | pathogenicity-related protein                                      |
| ACD58158 | 7.618304738 | 7.683317487 | 7.094172718 | acyl-CoA thioesterase II                                           |
| ACD58159 | 5.993721907 | 6.326357575 | 5.621169822 | enoyl-CoA hydratase/isomerase family protein                       |
| ACD58161 | 7.636472368 | 7.271873834 | 6.597888675 | putative thioesterase                                              |
| ACD58162 | 7.272097861 | 7.029927669 | 6.289520962 | excinuclease ABC, A subunit                                        |
| ACD58166 | 9.089818556 | 10.01395071 | 10.12791696 | ribosomal protein S20                                              |
| ACD58172 | 0           | 0           | 7.610035603 | hypothetical protein                                               |
| ACD58184 | 8.306143736 | 5.649879833 | 8.517303255 | transposase                                                        |
| ACD58192 | 5.929682129 | 5.116061113 | 6.874551087 | conserved hypothetical protein                                     |
| ACD58194 | 0           | 0           | 0           | ISXo2 putative transposase                                         |
| ACD58195 | 0           | 0           | 0           | conserved hypothetical protein                                     |
| ACD58197 | 8.032756565 | 7.392961339 | 7.837224237 | conserved hypothetical protein                                     |
| ACD58198 | 0           | 0           | 0           | conserved hypothetical protein                                     |
| ACD58199 | 7.462265042 | 6.973266861 | 7.382900652 | conserved hypothetical protein                                     |
| ACD58200 | 1.170803175 | 2.28527792  | 1.516186646 | conserved hypothetical protein                                     |
| ACD58201 | 5.205908563 | 5.126233649 | 5.096658236 | Rhs element Vgr protein                                            |
| ACD58225 | 8.3323499   | 9.066094574 | 7.259592632 | ImpA-related N-terminal family                                     |
| ACD58226 | 8.189814677 | 9.359696858 | 7.55444304  | transcriptional regulator, LysR family                             |



|          |             |             |             |                                                                                                                         |
|----------|-------------|-------------|-------------|-------------------------------------------------------------------------------------------------------------------------|
| ACD58227 | 7.298951516 | 6.741480469 | 6.434232892 | VirA-like protein                                                                                                       |
| ACD58228 | 6.911619685 | 6.590637946 | 5.892677593 | cytochrome C peroxidase                                                                                                 |
| ACD58229 | 6.63119161  | 7.130714696 | 5.408664314 | VirG                                                                                                                    |
| ACD58230 | 6.684510197 | 5.017659171 | 6.731631298 | transposase                                                                                                             |
| ACD58232 | 6.500266678 | 0           | 6.806195147 | transposase                                                                                                             |
| ACD58233 | 8.783292941 | 8.190116033 | 8.720637589 | transposase                                                                                                             |
| ACD58234 | 8.075404272 | 8.198454864 | 8.258787426 | hypothetical protein                                                                                                    |
| ACD58235 | 3.950244434 | 2.959529068 | 3.737102644 | putative ISXoo14 transposase                                                                                            |
| ACD58236 | 6.62000863  | 6.526793421 | 7.188321793 | early chlorosis factor protein                                                                                          |
| ACD58238 | 6.854855919 | 7.338103463 | 6.77615664  | conserved hypothetical protein                                                                                          |
| ACD58243 | 5.042530528 | 4.663708948 | 5.243375851 | Tal2b, also PthXo1, TAL effector AvrBs3/PthA family                                                                     |
| ACD58246 | 5.273698639 | 4.654166271 | 4.855805363 | Tal2a, TAL effector AvrBs3/PthA family                                                                                  |
| ACD58247 | 7.590706802 | 7.142352167 | 6.654449862 | tetratricopeptide repeat domain protein                                                                                 |
| ACD58248 | 7.854033061 | 7.594078224 | 6.57616535  | C-type cytochrome biogenesis protein                                                                                    |
| ACD58249 | 7.367065229 | 5.232223278 | 6.882997566 | C-type cytochrome biogenesis protein/thioredoxin                                                                        |
| ACD58250 | 7.174716002 | 7.237114336 | 6.444935361 | cytochrome c-type biogenesis protein CcmF                                                                               |
| ACD58251 | 6.268767481 | 6.347001198 | 6.56633722  | C-type cytochrome biogenesis protein                                                                                    |
| ACD58252 | 7.359591448 | 8.31579263  | 7.94687704  | conserved domain protein                                                                                                |
| ACD58253 | 7.185143035 | 7.114314964 | 6.498276402 | heme exporter protein C/x3b cytochrome C-type biogenesis protein                                                        |
| ACD58254 | 6.159483876 | 5.831378189 | 5.730661691 | serine protease                                                                                                         |
| ACD58255 | 5.644914739 | 5.665293275 | 7.182930609 | conserved hypothetical protein                                                                                          |
| ACD58256 | 7.065852311 | 6.185127173 | 7.599734353 | RNA polymerase sigma-E factor                                                                                           |
| ACD58257 | 6.29788838  | 6.37326017  | 6.335465391 | conserved hypothetical protein                                                                                          |
| ACD58258 | 7.158256229 | 5.728217129 | 7.064494885 | cytochrome C2                                                                                                           |
| ACD58259 | 7.207765986 | 6.626075497 | 6.742949369 | cytochrome C                                                                                                            |
| ACD58260 | 6.399887136 | 6.470667008 | 6.268720703 | cytochrome like B561                                                                                                    |
| ACD58275 | 6.248707497 | 6.114700172 | 6.348499783 | conserved hypothetical protein                                                                                          |
| ACD58276 | 7.08961467  | 6.312247667 | 6.789285839 | Mg-protoporphyrin IX monomethyl ester oxidative cyclase                                                                 |
| ACD58279 | 7.370853024 | 7.451161647 | 6.925690915 | MFS transporter                                                                                                         |
| ACD58280 | 8.251804289 | 8.763428174 | 7.980133864 | hypothetical protein                                                                                                    |
| ACD58283 | 8.092344883 | 8.371567575 | 7.584331184 | ExoD protein                                                                                                            |
| ACD58284 | 6.826904351 | 7.03998279  | 5.787361937 | hemolysin                                                                                                               |
| ACD58288 | 5.91032013  | 5.49276331  | 5.97188838  | serine carboxypeptidase                                                                                                 |
| ACD58290 | 7.530172209 | 7.573919797 | 7.114564841 | DNA topoisomerase IV, B subunit                                                                                         |
| ACD58301 | 7.505343148 | 7.591342817 | 7.232209844 | Smr domain protein                                                                                                      |
| ACD58306 | 8.656238928 | 8.258085448 | 8.044377725 | conserved hypothetical protein                                                                                          |
| ACD58307 | 10.26886945 | 10.74815091 | 9.908200449 | conserved hypothetical protein                                                                                          |
| ACD58315 | 9.749385097 | 7.632479078 | 11.05521464 | hypothetical protein                                                                                                    |
| ACD58325 | 8.694535492 | 8.935282936 | 8.238954005 | hypothetical protein                                                                                                    |
| ACD58332 | 7.118245505 | 7.630252561 | 7.506954144 | pirin, N-terminal                                                                                                       |
| PXO_ma10 | 0           | 0           | 0           | XO_ma10 cDNA:pseudogene<br>chromosome:GCA_000019585.1:Chromosome:1735706:1735782:-1<br>gene:PXO_ma10 transcript:PXO_ma1 |
| PXO_ma11 | 0           | 0           | 0           | XO_ma11 cDNA:pseudogene<br>chromosome:GCA_000019585.1:Chromosome:1735876:1735952:-1<br>gene:PXO_ma11 transcript:PXO_ma1 |
| ACD58335 | 7.338451158 | 7.194096904 | 5.957782299 | conserved hypothetical protein                                                                                          |
| ACD58336 | 8.544415834 | 10.26550957 | 9.257178024 | conserved hypothetical protein                                                                                          |
| ACD58337 | 7.541359956 | 7.426734393 | 6.979590964 | phosphomethylpyrimidine kinase                                                                                          |
| ACD58338 | 7.3870092   | 7.3587391   | 6.391783183 | putative secreted protein                                                                                               |
| ACD58339 | 7.523679562 | 7.111052185 | 6.555843757 | PhoH family protein                                                                                                     |
| ACD58340 | 7.970968661 | 7.717128026 | 7.79273174  | bacterioferritin comigratory protein                                                                                    |
| ACD58341 | 9.270867618 | 9.559009917 | 9.023366256 | conserved hypothetical protein                                                                                          |
| ACD58342 | 8.510554522 | 8.518082652 | 8.674199332 | glycine cleavage system transcriptional repressor                                                                       |
| ACD58345 | 8.961084995 | 8.884665073 | 9.865389952 | ferredoxin                                                                                                              |
| ACD58347 | 6.795572158 | 6.591888817 | 6.453096101 | 2-oxo-3-deoxygalactonate kinase                                                                                         |
| ACD58348 | 6.453669018 | 6.706143719 | 6.285827566 | regucalcin                                                                                                              |
| ACD58349 | 7.138261559 | 6.89285242  | 6.287193378 | galactonate dehydratase                                                                                                 |
| ACD58350 | 6.750016873 | 6.635249418 | 6.149320344 | 2-dehydro-3-deoxy-6-phosphogalactonate aldolase                                                                         |
| ACD58352 | 8.596827085 | 8.728577004 | 7.76614458  | relaxation protein                                                                                                      |
| ACD58358 | 5.77538246  | 5.758700258 | 6.594733652 | transposase                                                                                                             |
| ACD58361 | 10.95237725 | 11.34378533 | 11.81121813 | conserved hypothetical protein                                                                                          |
| ACD58362 | 11.53562531 | 11.37610911 | 9.784759154 | lipoprotein, putative                                                                                                   |
| ACD58363 | 7.152345693 | 7.247035044 | 7.113856744 | elongation factor P                                                                                                     |
| ACD58364 | 7.423351261 | 7.161010918 | 6.899211891 | 3-hydroxyacyl-CoA dehydrogenase type II                                                                                 |

|          |             |             |              |                                                                               |
|----------|-------------|-------------|--------------|-------------------------------------------------------------------------------|
| ACD58365 | 6.577250557 | 6.13544868  | 5.776838312  | hydroxymethylglutaryl-CoA lyase                                               |
| ACD58366 | 6.698107326 | 7.385362007 | 6.784608674  | glyoxalase family protein                                                     |
| ACD58367 | 7.056095756 | 6.951238082 | 6.41706599   | enoyl-CoA hydratase                                                           |
| ACD58378 | 11.08282099 | 10.96895473 | 13.21730646  | hypothetical protein                                                          |
| ACD58385 | 6.25222073  | 6.089015025 | 8.080700296  | ISXo8 transposase                                                             |
| ACD58388 | 6.459267667 | 6.910240968 | 5.689997971  | transposase subfamily, putative                                               |
| ACD58394 | 7.29953774  | 7.827603112 | 7.612831646  | RpfF protein                                                                  |
| ACD58395 | 7.594473905 | 7.661856464 | 6.613966223  | long-chain-fatty-acid--CoA ligase                                             |
| ACD58398 | 7.277259499 | 7.747931128 | 7.414456923  | aconitate hydratase 1                                                         |
| ACD58404 | 7.022523172 | 7.804840898 | 6.72492307   | C-di-GMP phosphodiesterase A                                                  |
| ACD58405 | 7.158791434 | 7.938109326 | 7.000067625  | chemotaxis response regulator protein-glutamate methylesterase group 1 operon |
| ACD58406 | 8.456354415 | 9.700923425 | 7.45292484   | chemotaxis protein                                                            |
| ACD58407 | 7.889309259 | 8.794802483 | 9.696084257  | chemotaxis protein methyltransferase 2                                        |
| ACD58408 | 6.486683807 | 5.920043142 | 5.712727829  | methyl-accepting chemotaxis protein                                           |
| ACD58409 | 8.169018023 | 7.821876003 | 7.275947548  | conserved hypothetical protein                                                |
| ACD58412 | 8.057856379 | 8.439398738 | 8.518999282  | chemotaxis signal transduction protein                                        |
| ACD58413 | 7.816574108 | 8.558034157 | 8.52509009   | type IV pilus assembly protein PilZ                                           |
| ACD58415 | 7.509814584 | 7.930388447 | 9.005004113  | chemotaxis protein                                                            |
| ACD58416 | 7.437602282 | 8.477321143 | 9.536771737  | chemotaxis protein                                                            |
| ACD58417 | 11.11160519 | 9.791898703 | 10.54501271  | hypothetical protein                                                          |
| ACD58418 | 6.985432119 | 6.40040472  | 6.342168918  | chemotaxis protein                                                            |
| ACD58419 | 7.374622206 | 8.254943564 | 8.56069203   | chemotaxis protein                                                            |
| ACD58420 | 7.422804851 | 7.878369773 | 8.152158062  | chemotaxis protein                                                            |
| ACD58421 | 3.281819891 | 0.560313878 | 2.134707233  | ISXo5 transposase                                                             |
| ACD58422 | 7.123904116 | 7.782428224 | 7.150579985  | chemotaxis protein                                                            |
| ACD58423 | 7.162874664 | 8.167894784 | 6.922483314  | conserved hypothetical protein                                                |
| ACD58424 | 0           | 10.81000119 | 10.66273957  | hypothetical protein                                                          |
| ACD58425 | 6.134929379 | 6.710448298 | 6.576470742  | chemotaxis protein                                                            |
| ACD58427 | 9.689727222 | 11.41607442 | 10.50676378  | transposition helper protein                                                  |
| ACD58428 | 7.751878752 | 8.712791785 | 8.775284341  | chemotaxis protein CheA                                                       |
| ACD58429 | 8.288266268 | 9.687835803 | 10.00430475  | chemotaxis response regulator                                                 |
| ACD58430 | 9.046515616 | 10.51774811 | 11.46047125  | conserved hypothetical protein                                                |
| ACD58431 | 7.628248671 | 8.385638108 | 8.08717109   | chemotaxis protein                                                            |
| ACD58432 | 6.427850847 | 7.691973774 | 7.319654059  | chromosome partitioning protein                                               |
| ACD58433 | 7.451903439 | 8.172247473 | 8.129133587  | OmpA family protein                                                           |
| ACD58434 | 8.295070947 | 9.146326827 | 8.804750569  | MotA protein                                                                  |
| ACD58437 | 7.02357695  | 6.204209202 | 6.64508196   | TonB-dependent receptor                                                       |
| ACD58438 | 8.534306774 | 8.018361551 | 8.837482868  | TonB-dependent siderophore receptor, putative                                 |
| ACD58439 | 9.696343382 | 10.00309622 | 8.507326878  | superoxide dismutase                                                          |
| ACD58440 | 7.802303095 | 8.686801641 | 6.757236647  | PepSY-associated membrane protein                                             |
| ACD58441 | 6.43367223  | 6.082862227 | 5.77298619   | TonB-dependent outer membrane Receptor                                        |
| ACD58442 | 8.380660193 | 7.688208339 | 7.221152072  | hypothetical protein                                                          |
| ACD58444 | 0           | 0           | 0            | ISXo8 transposase                                                             |
| ACD58445 | 7.598268423 | 8.657875767 | 7.396793133  | transposase                                                                   |
| ACD58446 | 6.548401173 | 7.028204454 | 6.051613546  | isrso17-transposase protein                                                   |
| ACD58450 | 6.393577513 | 6.270941883 | 6.233316727  | ISxac3 transposase                                                            |
| ACD58456 | 0           | 0           | -0.293885905 | ISxac3 transposase                                                            |
| ACD58465 | 0           | 0           | 11.69134223  | putative transposase                                                          |
| ACD58469 | 7.69405138  | 7.617158874 | 8.56220044   | regulator of pathogenicity factors                                            |
| ACD58470 | 6.627354403 | 6.709979832 | 7.328127362  | pts system fructose-specific eiibc component (eiibc-fru) (eii-fru)            |
| ACD58471 | 6.624874395 | 6.859273866 | 6.83791802   | 1-phosphofructokinase                                                         |
| ACD58472 | 6.740779183 | 7.071247819 | 7.508745554  | multiphosphoryl transfer protein (MTP)                                        |
| ACD58477 | 6.773178777 | 6.520115761 | 6.513132238  | transposase and inactivated derivative                                        |
| ACD58478 | 7.486609803 | 7.388990238 | 7.044995117  | AcrB protein                                                                  |
| ACD58479 | 6.897119389 | 6.633031537 | 6.377606187  | multidrug resistance protein                                                  |
| ACD58480 | 9.025676665 | 8.972235996 | 8.040717123  | transcriptional regulator TetR/acrR family                                    |
| ACD58481 | 8.759971381 | 0           | 10.36285339  | hypothetical protein                                                          |
| ACD58485 | 7.303369795 | 7.62529241  | 5.407012774  | two-component system regulatory protein with HD-GYP domain                    |
| ACD58486 | 7.973215192 | 8.090620582 | 6.48773233   | two-component system sensor histidine kinase-response regulator hybridprotein |
| ACD58487 | 7.733340781 | 7.668608471 | 7.310040134  | conserved hypothetical protein                                                |
| ACD58488 | 6.39342993  | 6.566690359 | 6.811329734  | conserved hypothetical protein                                                |
| ACD58490 | 7.003523534 | 6.961252884 | 6.700731002  | omega-amino acid-pyruvate aminotransferase                                    |
| ACD58496 | 0           | 0           | 0            | hypothetical protein                                                          |
| ACD58497 | 6.698579663 | 7.386310882 | 7.252201803  | Putative two-component system regulatory protein with GGDEF domain            |

|          |             |              |             |                                                                                                                         |
|----------|-------------|--------------|-------------|-------------------------------------------------------------------------------------------------------------------------|
| ACD58498 | 6.681575763 | 6.33558151   | 6.659739073 | oxidoreductase                                                                                                          |
| ACD58499 | 7.219623527 | 6.824144112  | 7.329455522 | gamma-glutamylputrescine synthetase                                                                                     |
| ACD58502 | 0           | -0.087137099 | 2.12460275  | ISXo8 transposase                                                                                                       |
| ACD58510 | 8.472049047 | 7.573548733  | 8.092699009 | conserved hypothetical protein                                                                                          |
| ACD58512 | 7.624861239 | 6.891844447  | 5.953754126 | magnesium and cobalt transport protein                                                                                  |
| ACD58513 | 7.714149335 | 7.953550443  | 6.352147623 | membrane protein, putative                                                                                              |
| ACD58514 | 8.666149425 | 9.157531366  | 8.311784637 | polar amino acid transporter                                                                                            |
| ACD58515 | 7.062218873 | 7.077584829  | 7.027253596 | conserved hypothetical protein                                                                                          |
| ACD58516 | 8.190279035 | 8.576643063  | 9.233703552 | conserved hypothetical protein, putative                                                                                |
| ACD58517 | 6.506509911 | 6.860503505  | 5.909084228 | conserved hypothetical protein                                                                                          |
| ACD58518 | 7.240056682 | 6.82671372   | 6.306856434 | ATP-binding protein                                                                                                     |
| ACD58519 | 7.084468265 | 6.902145954  | 6.864520464 | tRNA-I(6)A37 thiotransferase enzyme MiaB                                                                                |
| ACD58520 | 7.362522249 | 8.481638002  | 7.208975638 | glutathione S-transferase                                                                                               |
| ACD58521 | 7.322496044 | 6.239749354  | 7.067767769 | glutathione S-transferase                                                                                               |
| ACD58531 | 7.707421256 | 7.661877836  | 7.651661657 | conserved hypothetical protein                                                                                          |
| ACD58532 | 7.893538168 | 8.387797634  | 8.624620019 | hypothetical protein                                                                                                    |
| PXO_ma12 | 0           | 0            | 0           | XO_ma12 cDNA:pseudogene<br>chromosome:GCA_000019585.1:Chromosome:1976131:1976206:-1<br>gene:PXO_ma12 transcript:PXO_ma1 |
| ACD58545 | 8.175943696 | 8.206516248  | 8.267503026 | virulence regulator                                                                                                     |
| ACD58547 | 8.092302594 | 8.15904382   | 7.161978352 | ribonuclease D                                                                                                          |
| ACD58548 | 9.373830885 | 0            | 9.327310116 | hypothetical protein                                                                                                    |
| ACD58552 | 8.786011455 | 10.90155328  | 10.66993915 | hypothetical protein                                                                                                    |
| ACD58553 | 6.555971028 | 6.556930562  | 8.078124116 | exodeoxyribonuclease VII, large subunit                                                                                 |
| ACD58554 | 7.540972674 | 7.687655621  | 8.633623741 | iron-sulfur cluster binding protein, putative                                                                           |
| ACD58561 | 9.958507766 | 10.00019723  | 10.79518737 | polyhydroxyalkanoate synthesis repressor PhaR                                                                           |
| ACD58562 | 7.128747059 | 7.296521648  | 6.927659461 | acetoacetyl-CoA reductase                                                                                               |
| ACD58563 | 6.390397705 | 6.054284136  | 5.415265157 | glutamyl-Q tRNA(Asp) synthetase                                                                                         |
| ACD58565 | 7.476981066 | 7.916984126  | 6.598851997 | Putative signal protein with PAS, GGDEF and EAL domains                                                                 |
| ACD58566 | 6.919065916 | 6.924064246  | 5.807579038 | conserved hypothetical protein                                                                                          |
| ACD58567 | 7.413611006 | 7.810359553  | 6.539549682 | YaeQ family protein                                                                                                     |
| ACD58568 | 7.838233265 | 7.367851534  | 7.221171411 | EMG2                                                                                                                    |
| ACD58571 | 6.428304893 | 6.537061501  | 6.329398113 | carboxylesterase                                                                                                        |
| ACD58574 | 6.521328756 | 6.80472476   | 7.214863065 | ATP-dependent RNA helicase                                                                                              |
| ACD58577 | 7.276273321 | 7.30241959   | 7.892749226 | conserved hypothetical protein                                                                                          |
| ACD58578 | 6.671491531 | 6.457756793  | 8.055385481 | ribonuclease                                                                                                            |
| ACD58580 | 6.564893325 | 6.988968654  | 7.019501773 | inositol-1-monophosphatase                                                                                              |
| ACD58582 | 0           | 8.715512472  | 8.94018731  | hypothetical protein                                                                                                    |
| ACD58585 | 7.271378985 | 7.484871218  | 7.521726057 | lysine 2,3-aminomutase                                                                                                  |
| ACD58592 | 8.490100761 | 8.310040134  | 8.239202301 | polygalacturonase                                                                                                       |
| ACD58595 | 7.758436438 | 7.796188901  | 7.338673994 | pectinesterase                                                                                                          |
| ACD58598 | 5.693144015 | 5.556944353  | 5.769695054 | ISXo8 transposase                                                                                                       |
| ACD58599 | 8.775518103 | 8.796010398  | 7.384878704 | ISXo1 transposase                                                                                                       |
| ACD58602 | 0           | 0            | 9.910752146 | hypothetical protein                                                                                                    |
| ACD58604 | 8.036360464 | 6.52530155   | 7.71290525  | ethanolamine ammonia-lyase light chain                                                                                  |
| ACD58606 | 7.171797286 | 7.365526327  | 6.126221257 | peptidase                                                                                                               |
| ACD58607 | 8.13126536  | 7.841778181  | 8.327723287 | dihydroorotase                                                                                                          |
| ACD58610 | 7.158589493 | 6.982252078  | 5.817262539 | drug/x3aprotin antiporter                                                                                               |
| ACD58611 | 7.556942821 | 7.736726628  | 7.943048087 | SufE protein probably involved in Fe-S center assembly                                                                  |
| ACD58612 | 8.902405265 | 8.812863987  | 8.141115981 | cysteinyl-tRNA synthetase                                                                                               |
| ACD58628 | 6.363829884 | 6.176907153  | 5.635333592 | MFS transporter                                                                                                         |
| PXO_ma13 | 0           | 0            | 0           | XO_ma13 cDNA:pseudogene<br>chromosome:GCA_000019585.1:Chromosome:2061380:2061456:-1<br>gene:PXO_ma13 transcript:PXO_ma1 |
| ACD58629 | 9.034072619 | 8.669898414  | 9.245383946 | cytochrome D ubiquinol oxidase subunit II                                                                               |
| ACD58630 | 9.549189758 | 9.02500664   | 9.501520752 | cytochrome D ubiquinol oxidase subunit I                                                                                |
| ACD58631 | 7.671951438 | 7.236014192  | 7.474484716 | cytochrome D ubiquinol oxidase subunit I                                                                                |
| ACD58635 | 2.536552782 | 2.693939628  | 2.670992119 | ISXo8 transposase                                                                                                       |
| ACD58636 | 0           | 0.565392455  | 1.155289414 | ISXo5 transposase                                                                                                       |
| ACD58637 | 9.570982748 | 8.468538517  | 6.507859639 | lipoprotein, putative                                                                                                   |
| PXO_ma14 | 0           | 0            | 0           | XO_ma14 cDNA:pseudogene<br>chromosome:GCA_000019585.1:Chromosome:2070700:2070775:-1<br>gene:PXO_ma14 transcript:PXO_ma1 |
| PXO_ma15 | 0           | 0            | 0           | XO_ma15 cDNA:pseudogene<br>chromosome:GCA_000019585.1:Chromosome:2070823:2070898:-1<br>gene:PXO_ma15 transcript:PXO_ma1 |

|          |              |              |              |                                                                                                                         |
|----------|--------------|--------------|--------------|-------------------------------------------------------------------------------------------------------------------------|
| PXO_ma16 | 0            | 0            | 0            | XO_ma16 cdna:pseudogene<br>chromosome:GCA_000019585.1:Chromosome:2071658:2071733:-1<br>gene:PXO_ma16 transcript:PXO_ma1 |
| PXO_ma17 | 0            | 0            | 0            | XO_ma17 cdna:pseudogene<br>chromosome:GCA_000019585.1:Chromosome:2071781:2071856:-1<br>gene:PXO_ma17 transcript:PXO_ma1 |
| ACD58641 | 7.075179615  | 6.924384975  | 6.232353768  | cytochrome C552                                                                                                         |
| ACD58642 | 9.087619302  | 8.850693177  | 9.527064469  | cytochrome C4                                                                                                           |
| ACD58648 | 7.666855987  | 7.798724514  | 7.09751599   | ISXoo5 transposase                                                                                                      |
| ACD58649 | 2.28137778   | 2.934778786  | 2.454523362  | transposase                                                                                                             |
| ACD58650 | 6.165572323  | 4.547005551  | 6.731997787  | Tal4, TAL effector AvrBs3/PthA family                                                                                   |
| ACD58656 | 6.983974046  | 7.176233     | 8.712048889  | albxii protein                                                                                                          |
| ACD58662 | 6.896695681  | 7.167106992  | 6.750606505  | ISXoo2 transposase                                                                                                      |
| ACD58663 | 9.047391154  | 10.30439696  | 10.16499489  | hypothetical protein                                                                                                    |
| ACD58667 | 8.402479172  | 10.25337478  | 11.13166407  | hypothetical protein                                                                                                    |
| ACD58668 | 6.600144845  | 6.751061964  | 7.025139562  | uracil phosphoribosyltransferase                                                                                        |
| ACD58672 | 6.14537992   | 6.680915043  | 5.89447099   | transposase (IS4 family)                                                                                                |
| ACD58677 | 3.367077464  | 1.009612323  | 0            | IS1478 transposase                                                                                                      |
| ACD58679 | 0            | 9.330397056  | 9.047920038  | hypothetical protein                                                                                                    |
| ACD58680 | 7.700835018  | 7.828276144  | 8.892321197  | L-lysine 6-aminotransferase                                                                                             |
| ACD58685 | 8.796662641  | 10.5324923   | 10.21416124  | hypothetical protein                                                                                                    |
| ACD58688 | 5.622669776  | 6.133351857  | 5.57244103   | site-specific recombinase                                                                                               |
| ACD58692 | 0            | 0.931947747  | 0.955721968  | ISXoo8 transposase                                                                                                      |
| ACD58693 | 4.829753174  | 4.463916668  | 5.210018635  | IS1113 transposase                                                                                                      |
| ACD58696 | 7.705853526  | 8.037069179  | 6.489419302  | ribonuclease T                                                                                                          |
| ACD58698 | 7.438866688  | 6.797765266  | 7.219720318  | conserved hypothetical protein                                                                                          |
| ACD58699 | 7.735115956  | 7.464831606  | 9.882179907  | phosphate transport system regulatory protein PhoU                                                                      |
| ACD58701 | 5.212946694  | 6.300220755  | 7.744981799  | phosphate import ATP-binding protein PstB                                                                               |
| ACD58702 | 3.344075714  | 5.622611213  | -6.028731851 | phosphate ABC transporter, permease protein PstA                                                                        |
| ACD58703 | -3.627261816 | -6.332399576 | 0            | phosphate ABC transporter, permease protein PstC                                                                        |
| ACD58704 | 6.737713798  | 7.161535025  | 9.936157942  | phosphate ABC transporter, phosphate-binding protein PstS                                                               |
| ACD58705 | 8.717553052  | 8.918693323  | 10.2733527   | phosphate ABC transporter, phosphate-binding protein PstS                                                               |
| ACD58706 | 6.62986803   | 6.737335237  | 9.341830123  | polyphosphate-selective porin O                                                                                         |
| ACD58711 | 8.110358023  | 7.507318948  | 8.335296554  | endonuclease III                                                                                                        |
| ACD58712 | 6.411439805  | 4.99699878   | 6.979659552  | conserved hypothetical protein                                                                                          |
| ACD58713 | 8.084781819  | 7.549214792  | 8.067025562  | 3-hydroxybutyryl-CoA dehydratase                                                                                        |
| ACD58718 | 7.620982218  | 7.020113228  | 7.485298009  | N-acetylmuramoyl-L-alanine amidase, putative                                                                            |
| ACD58726 | 7.124017889  | 6.966499684  | 6.337771738  | conserved hypothetical protein                                                                                          |
| ACD58727 | 7.159245697  | 6.757103275  | 6.263286104  | putative oxidoreductase                                                                                                 |
| ACD58728 | 7.648875241  | 7.471455745  | 7.187599513  | conserved hypothetical protein                                                                                          |
| ACD58729 | 6.823303543  | 6.629108863  | 5.987836996  | exodeoxyribonuclease I                                                                                                  |
| ACD58730 | 0            | 9.019421153  | 7.98123618   | hypothetical protein                                                                                                    |
| ACD58731 | 7.800013308  | 7.355492055  | 7.661970444  | kynurenine 3-monooxygenase                                                                                              |
| ACD58733 | 7.404698799  | 7.170556042  | 7.581788087  | kynureninase                                                                                                            |
| ACD58734 | 6.919709529  | 6.377149784  | 5.735736075  | conserved hypothetical protein                                                                                          |
| ACD58735 | 6.976707312  | 6.966603503  | 5.562105018  | conserved hypothetical protein                                                                                          |
| ACD58736 | 7.301230952  | 6.483978575  | 6.890702036  | 3-hydroxyanthranilate 3,4-dioxygenase                                                                                   |
| ACD58737 | 6.355287661  | 6.471265512  | 6.815152702  | carbonic anhydrase                                                                                                      |
| ACD58738 | 7.93667327   | 6.880905879  | 8.005910814  | transcriptional regulator protein Pai2                                                                                  |
| ACD58739 | 7.902634384  | 7.895181422  | 6.430930862  | transcriptional regulator protein Pai2                                                                                  |
| ACD58740 | 7.766051796  | 7.2773153    | 7.405447844  | conserved hypothetical protein                                                                                          |
| ACD58741 | 7.707925055  | 8.29556692   | 6.72807016   | putative membrane protein                                                                                               |
| ACD58742 | 9.24055285   | 8.823768464  | 8.908947974  | conserved hypothetical protein                                                                                          |
| ACD58743 | 7.876713385  | 7.818262608  | 8.574260487  | asparaginyl-tRNA synthetase                                                                                             |
| ACD58751 | 11.23438635  | 11.65442122  | 9.771953236  | conserved domain protein                                                                                                |
| ACD58752 | 10.39958769  | 0            | 9.10939974   | hypothetical protein                                                                                                    |
| ACD58760 | 9.633216854  | 9.286070235  | 8.611795751  | conserved hypothetical protein                                                                                          |
| ACD58761 | 10.01904857  | 9.911980631  | 8.632279123  | acyltransferase, putative                                                                                               |
| ACD58762 | 7.210086843  | 7.314479018  | 6.210757051  | urocanate hydratase                                                                                                     |
| ACD58763 | 6.952636426  | 6.886440405  | 6.195524774  | N-formylglutamate amidohydrolase                                                                                        |
| ACD58764 | 7.516874014  | 7.582412991  | 6.835090344  | histidine ammonia-lyase                                                                                                 |
| ACD58765 | 6.603277682  | 6.808294944  | 6.543463404  | imidazolonepropionase                                                                                                   |
| ACD58768 | 7.50831772   | 7.891595381  | 6.829430996  | conserved hypothetical protein                                                                                          |
| ACD58769 | 7.935607074  | 9.016220506  | 8.48979579   | poly(hydroxyalcanoate) granule associated protein                                                                       |
| ACD58770 | 8.039346797  | 8.166635114  | 9.678895866  | putative polyhydroxyalkanoic acid system protein                                                                        |

|           |             |             |              |                                                                                                                            |
|-----------|-------------|-------------|--------------|----------------------------------------------------------------------------------------------------------------------------|
| ACD58773  | 9.726385073 | 10.34496161 | 9.787109185  | NapD                                                                                                                       |
| ACD58774  | 8.574052297 | 8.787141843 | 9.902254508  | twin-arginine translocation pathway signal                                                                                 |
| ACD58778  | 6.639185848 | 5.904281769 | 6.188351468  | transposase                                                                                                                |
| ACD58780  | 12.1643193  | 11.81748336 | 9.701904212  | IS1595 transposase                                                                                                         |
| ACD58781  | 9.270236917 | 0           | 9.108273531  | transposase                                                                                                                |
| ACD58784  | 6.556443211 | 6.280759637 | 6.467589248  | modulation protein                                                                                                         |
| ACD58785  | 6.70683442  | 6.544027826 | 6.354362236  | modulation protein                                                                                                         |
| ACD58786  | 5.875721096 | 5.835009471 | 6.042484564  | cation efflux system protein                                                                                               |
| ACD58787  | 6.494135557 | 5.93936059  | 5.664212594  | cation efflux system protein                                                                                               |
| ACD58788  | 7.341051748 | 6.29356545  | 6.838195439  | cation efflux system protein                                                                                               |
| ACD58790  | 6.248912386 | 6.017271658 | 6.258707352  | serine protease                                                                                                            |
| ACD58793  | 5.061136778 | 0           | 2.509591974  | transposase                                                                                                                |
| ACD58794  | 6.842815451 | 5.035412768 | 4.998502427  | ISXoo3 transposase ORF A                                                                                                   |
| PXO_rna18 | 0           | 0           | 0            | XO_rna18 cdna:pseudogene<br>chromosome:GCA_000019585.1:Chromosome:2235296:2235370:-1<br>gene:PXO_rna18 transcript:PXO_rna1 |
| ACD58808  | 7.915479073 | 7.667232205 | 9.111002613  | alkaline phosphatase                                                                                                       |
| ACD58810  | 9.623045618 | 8.502565313 | 9.902794144  | hypothetical protein                                                                                                       |
| ACD58813  | 8.488864426 | 9.660539698 | 10.73345603  | Putative signal protein with GAF, GGDEF and EAL domains                                                                    |
| PXO_rna19 | 0           | 0           | 0            | XO_rna19 cdna:pseudogene<br>chromosome:GCA_000019585.1:Chromosome:2252421:2252507:-1<br>gene:PXO_rna19 transcript:PXO_rna1 |
| ACD58816  | 7.590437346 | 7.779620874 | 5.550254261  | beta-glucosidase                                                                                                           |
| ACD58818  | 8.193283864 | 8.575871993 | 5.888382834  | zinc carboxypeptidase family                                                                                               |
| ACD58821  | 10.5539844  | 11.95774052 | 12.72727595  | conserved hypothetical protein                                                                                             |
| ACD58825  | 7.739443098 | 7.540066028 | 8.213415332  | conserved hypothetical protein                                                                                             |
| ACD58826  | 7.965132039 | 7.980630867 | 8.52431447   | putative DNA-directed RNA polymerase specialized sigma subunit, sigma24 homolog                                            |
| ACD58831  | 6.479426215 | 6.050125085 | 6.558391629  | peptidyl-dipeptidase dcp                                                                                                   |
| ACD58832  | 6.696188608 | 6.603986788 | 6.78719736   | peptidyl-dipeptidase dcp                                                                                                   |
| ACD58835  | 7.474801051 | 7.703280693 | 7.280074769  | ferredoxin--NADP reductase                                                                                                 |
| ACD58836  | 6.535905203 | 6.67116597  | 6.561908047  | ABC transporter ATP-binding protein                                                                                        |
| ACD58842  | 6.999628007 | 7.391063107 | 6.293716254  | Putative signal protein with GGDEF domain                                                                                  |
| ACD58845  | 0           | 0           | 0            | transposase                                                                                                                |
| ACD58848  | 0           | 0           | 0            | hypothetical protein                                                                                                       |
| ACD58850  | 7.577338185 | 7.180187653 | 7.965322548  | transposase                                                                                                                |
| ACD58851  | 0           | 0           | -0.974554408 | ISXo8 transposase                                                                                                          |
| ACD58852  | 0           | 0           | 0            | conserved hypothetical protein                                                                                             |
| ACD58855  | 4.912951592 | 4.554944877 | 5.361287615  | ISXoo8 transposase                                                                                                         |
| ACD58858  | 0           | 0           | 0            | cointegrate resolution protein T                                                                                           |
| ACD58872  | 6.891066733 | 6.734438666 | 6.282565831  | two-component system sensor protein                                                                                        |
| ACD58873  | 8.496266596 | 9.097558127 | 8.637432738  | two-component system regulatory protein                                                                                    |
| ACD58878  | 0           | 0           | 0            | transposase                                                                                                                |
| ACD58879  | 7.387431475 | 7.105091361 | 7.088258226  | khg/kdpg aldolase                                                                                                          |
| ACD58880  | 6.965553435 | 6.846944558 | 6.602755273  | phosphogluconate dehydratase                                                                                               |
| ACD58881  | 7.875952036 | 7.508729711 | 6.879068566  | 6-phosphogluconolactonase                                                                                                  |
| ACD58882  | 7.45322124  | 8.277157191 | 6.49937554   | glucokinase                                                                                                                |
| ACD58883  | 7.343247909 | 6.818812223 | 6.882166148  | glucose-6-phosphate 1-dehydrogenase                                                                                        |
| ACD58884  | 8.825502631 | 0           | 9.131864676  | hypothetical protein                                                                                                       |
| ACD58886  | 7.952339391 | 7.845878899 | 7.041921934  | glycine cleavage T-protein (aminomethyl transferase)                                                                       |
| ACD58898  | 6.943382207 | 6.622395975 | 6.076334619  | aldo-keto reductase family protein                                                                                         |
| ACD58899  | 9.781531843 | 10.79427776 | 8.650786096  | conserved hypothetical protein                                                                                             |
| ACD58900  | 2.959812805 | 1.565026809 | 1.866405568  | ISXo5 transposase                                                                                                          |
| ACD58906  | 9.956573634 | 7.006993618 | 7.889722975  | hypothetical protein                                                                                                       |
| ACD58912  | 6.06212819  | 6.512901609 | 5.436038544  | glyoxalase family protein                                                                                                  |
| ACD58913  | 6.685856073 | 5.442999876 | 5.656204599  | transposase                                                                                                                |
| ACD58917  | 8.149772519 | 6.949126345 | 7.631810029  | transposase                                                                                                                |
| ACD58918  | 7.194668222 | 7.086847443 | 7.499909651  | transposase                                                                                                                |
| ACD58920  | 4.923182466 | 4.560568232 | 5.572919977  | Tal5b, also PthXo6, TAL effector AvrBs3/PthA                                                                               |
| ACD58925  | 4.939588617 | 4.158345107 | 5.576098821  | Tal5a, TAL effector AvrBs3/PthA                                                                                            |
| ACD58928  | 8.357402449 | 8.439652224 | 8.735451097  | pectate lyase L                                                                                                            |
| ACD58936  | 9.731006696 | 9.889966282 | 8.598502923  | conserved domain protein                                                                                                   |
| ACD58942  | 0           | 0           | 0            | hypothetical protein                                                                                                       |
| ACD58944  | 0           | 0           | 0            | transposase                                                                                                                |
| ACD58945  | 6.359601989 | 5.282020873 | 4.781763612  | transposase                                                                                                                |

|          |             |             |             |                                                                                                                                                    |
|----------|-------------|-------------|-------------|----------------------------------------------------------------------------------------------------------------------------------------------------|
| ACD58953 | 7.550385104 | 7.914821612 | 7.935730817 | hypothetical protein                                                                                                                               |
| ACD58954 | 6.879999764 | 7.289354962 | 6.198010817 | phosphoribosyl-AMP cyclohydrolase domain protein                                                                                                   |
| ACD58955 | 7.615695839 | 7.318569924 | 6.560791366 | imidazoleglycerol phosphate synthase, cyclase subunit                                                                                              |
| ACD58956 | 7.47770161  | 5.995934443 | 5.942788943 | phosphoribosylformimino-5-aminoimidazole carboxamide ribotide isomerase                                                                            |
| ACD58957 | 6.867896464 | 7.029198868 | 6.35713849  | imidazole glycerol phosphate synthase, glutamine amidotransferase subunit                                                                          |
| ACD58958 | 6.562598092 | 6.011945069 | 6.116418823 | histidine biosynthesis bifunctional protein HisB                                                                                                   |
| ACD58959 | 6.673697747 | 6.415555875 | 6.397816665 | histidinol-phosphate aminotransferase                                                                                                              |
| ACD58960 | 6.771753554 | 6.647501599 | 6.252483783 | histidinol dehydrogenase                                                                                                                           |
| ACD58961 | 5.762000592 | 6.437012957 | 6.201908261 | ATP phosphoribosyltransferase                                                                                                                      |
| ACD58962 | 7.490401656 | 7.8111182   | 9.476472825 | putative TrpR homolog YerC/YecD                                                                                                                    |
| ACD58965 | 6.682390702 | 6.800589331 | 6.891674358 | histidyl-tRNA synthetase                                                                                                                           |
| ACD58966 | 7.863994185 | 7.927866832 | 6.968712867 | conserved hypothetical protein                                                                                                                     |
| ACD58967 | 7.122041091 | 7.272499155 | 6.449846914 | threonine synthase                                                                                                                                 |
| ACD58969 | 8.563207715 | 9.671197822 | 10.02808563 | NOL1/NOP2/sun family protein                                                                                                                       |
| ACD58970 | 0           | 0           | 0           | ISXo7 transposase                                                                                                                                  |
| ACD58972 | 6.996784168 | 6.766833648 | 5.93202809  | homoserine kinase                                                                                                                                  |
| ACD58973 | 7.075029825 | 6.885928162 | 6.929293921 | bifunctional aspartokinase/homoserine dehydrogenase 2, (ak-hd 2) (ak-hsdh 2)                                                                       |
| ACD58974 | 11.4184746  | 11.2371502  | 11.21887802 | hypothetical protein                                                                                                                               |
| ACD58975 | 0           | 8.106787996 | 7.981413158 | hypothetical protein                                                                                                                               |
| ACD58976 | 10.29973462 | 11.17278376 | 9.303168843 | tryptophan-rich sensory protein                                                                                                                    |
| PXO_ma24 | 0           | 0           | 0           | XO_ma24 cdna:pseudogene<br>chromosome:GCA_000019585.1:Chromosome:2416949:2417025:-1<br>gene:PXO_ma24 transcript:PXO_ma2                            |
| ACD58986 | 8.436257636 | 8.83960693  | 8.358413845 | hypothetical protein                                                                                                                               |
| ACD58987 | 0           | 0           | 0           | hypothetical protein                                                                                                                               |
| ACD58988 | 6.975905274 | 5.987721054 | 6.882202838 | IS1112 transposase                                                                                                                                 |
| ACD58990 | 7.868149655 | 7.912673814 | 7.642275573 | phosphatidylglycerophosphatase B                                                                                                                   |
| ACD58991 | 7.450609176 | 7.976512572 | 8.770617647 | 4-hydroxy-3-methylbut-2-en-1-yl diphosphate synthase                                                                                               |
| ACD58995 | 6.723258196 | 6.380305207 | 7.72644979  | ISXoo2 transposase                                                                                                                                 |
| ACD58996 | 6.942995324 | 7.336595819 | 7.244810966 | S1 RNA binding domain protein                                                                                                                      |
| ACD58997 | 9.242876367 | 9.983335675 | 11.26370347 | conserved hypothetical protein                                                                                                                     |
| ACD58999 | 6.71090284  | 7.582194682 | 5.96349262  | hypothetical protein                                                                                                                               |
| ACD59000 | 10.95017677 | 10.73365092 | 11.1581931  | PspC domain superfamily                                                                                                                            |
| ACD59001 | 7.254934119 | 6.646997842 | 6.471198843 | poly-beta-hydroxybutyrate polymerase (Poly(3-hydroxybutyrate) polymerase)<br>(PHB polymerase) (PHB synthase) (Poly(3-hydroxyalkanoate) polymerase) |
| ACD59002 | 6.80538275  | 6.98100779  | 6.520865361 | PHA synthase subunit                                                                                                                               |
| ACD59003 | 7.575039984 | 8.026894097 | 6.598944275 | CDP-diacylglycerol--serine O-phosphatidyltransferase                                                                                               |
| ACD59005 | 7.819463821 | 7.793733349 | 7.426843394 | 7,8-dihydro-8-oxoguanine-triphosphatase                                                                                                            |
| ACD59006 | 9.172057411 | 8.925204293 | 9.62942766  | conserved hypothetical protein                                                                                                                     |
| ACD59007 | 8.574483784 | 8.800576389 | 8.615419976 | GTP-binding protein                                                                                                                                |
| ACD59010 | 7.432633762 | 6.831915233 | 5.587310979 | oligoribonuclease                                                                                                                                  |
| ACD59011 | 6.66860138  | 6.734614792 | 5.624776451 | tRNA-specific adenosine deaminase                                                                                                                  |
| ACD59012 | 8.393467685 | 8.490401656 | 7.213755534 | iron dependent repressor                                                                                                                           |
| ACD59014 | 8.71027953  | 9.25988682  | 8.687263693 | hypothetical protein                                                                                                                               |
| ACD59017 | 10.53819863 | 9.268382927 | 9.590160353 | conserved domain protein                                                                                                                           |
| ACD59019 | 10.98294368 | 11.08638174 | 11.17492568 | conserved hypothetical protein                                                                                                                     |
| ACD59020 | 7.799838514 | 7.88006713  | 6.866178536 | transcriptional regulator LysR family                                                                                                              |
| ACD59023 | 6.894199333 | 7.315973724 | 6.132712552 | GMP synthase                                                                                                                                       |
| ACD59024 | 7.723271851 | 7.901952948 | 7.61579146  | inosine-5'-monophosphate dehydrogenase                                                                                                             |
| ACD59025 | 6.223795147 | 6.374363118 | 5.76212022  | FoID bifunctional protein                                                                                                                          |
| ACD59028 | 6.887171865 | 6.160851633 | 6.450148897 | transport protein                                                                                                                                  |
| ACD59029 | 9.095774131 | 9.268010907 | 8.630434595 | transport protein                                                                                                                                  |
| ACD59030 | 10.39489137 | 9.889356416 | 8.757259986 | hypothetical protein                                                                                                                               |
| ACD59031 | 9.092934164 | 9.233516623 | 9.289255814 | UTP-glucose-1-phosphate uridylyltransferase                                                                                                        |
| ACD59032 | 8.112632375 | 8.24701605  | 7.381075676 | epimerase                                                                                                                                          |
| ACD59033 | 8.00291063  | 8.162215073 | 7.668012723 | lipopolysaccharide core biosynthesis protein                                                                                                       |
| ACD59034 | 6.415243181 | 6.471673589 | 5.94535019  | heat shock protein                                                                                                                                 |
| ACD59035 | 9.154924409 | 9.279636115 | 9.101474119 | conserved hypothetical protein                                                                                                                     |
| ACD59036 | 8.560485694 | 8.770987575 | 8.462853957 | integration host factor, beta subunit                                                                                                              |
| ACD59037 | 10.14015235 | 10.39466633 | 9.761333482 | ribosomal protein S1                                                                                                                               |
| ACD59038 | 7.798944791 | 8.399594097 | 7.54814374  | cytidylate kinase                                                                                                                                  |
| ACD59047 | 6.301260223 | 6.446878175 | 5.846688871 | discoidin domain protein                                                                                                                           |
| ACD59048 | 7.48039439  | 7.687634628 | 6.49869446  | L-arabinose transport system permease protein AraQ                                                                                                 |
| ACD59049 | 7.302712028 | 7.059733814 | 6.282866027 | ABC transporter sugar permease                                                                                                                     |
| ACD59050 | 6.844385653 | 6.510408147 | 5.919828685 | ABC transporter sugar binding protein                                                                                                              |

|           |             |             |             |                                                                                                                            |
|-----------|-------------|-------------|-------------|----------------------------------------------------------------------------------------------------------------------------|
| ACD59051  | 7.353790821 | 7.224078873 | 7.006623424 | conserved hypothetical protein                                                                                             |
| ACD59052  | 6.996727686 | 6.699162923 | 7.40921271  | TonB-dependent outer membrane receptor                                                                                     |
| ACD59053  | 8.216095893 | 7.970548844 | 8.319956568 | transcriptional regulator LacI family                                                                                      |
| ACD59054  | 8.603659723 | 8.668615562 | 9.79757561  | transcriptional regulator, LacI family                                                                                     |
| ACD59055  | 9.215637346 | 8.380733777 | 9.476772527 | morphogene BolA protein                                                                                                    |
| ACD59056  | 9.336992955 | 8.753440742 | 8.992459718 | protein Ycil                                                                                                               |
| ACD59060  | 8.763527766 | 9.951822347 | 11.78481885 | conserved hypothetical protein                                                                                             |
| PXO_rna25 | 0           | 0           | 0           | XO_rna25 cDNA:pseudogene<br>chromosome:GCA_000019585.1:Chromosome:2691992:2692081:-1<br>gene:PXO_rna25 transcript:PXO_rna2 |
| ACD59345  | 0           | 0           | 0           | UDP-N-acetylglucosamine 1-carboxyvinyltransferase protein                                                                  |
| PXO_rna26 | 0           | 0           | 0           | XO_rna26 cDNA:pseudogene<br>chromosome:GCA_000019585.1:Chromosome:2904079:2904168:-1<br>gene:PXO_rna26 transcript:PXO_rna2 |
| ACD59446  | 2.839623054 | 0           | 0           | transposase (IS4 family)                                                                                                   |
| ACD59448  | 0.946992804 | 1.536356332 | 0           | ISXo1 transposase                                                                                                          |
| ACD59450  | 7.390272156 | 7.321134394 | 8.002921878 | RNA methyltransferase, TrmH family, group 3                                                                                |
| ACD59451  | 8.020807749 | 7.754072416 | 6.072515306 | conserved hypothetical protein                                                                                             |
| ACD59452  | 7.264799125 | 7.494623615 | 6.01732066  | ribonuclease R                                                                                                             |
| ACD59453  | 6.7380382   | 6.6779451   | 6.522292767 | acetylhydrolase                                                                                                            |
| ACD59454  | 9.251420867 | 8.988017144 | 8.256052968 | conserved domain protein                                                                                                   |
| ACD59455  | 7.460505043 | 7.263400669 | 8.009100789 | acyl-CoA dehydrogenase, short-chain specific                                                                               |
| ACD59459  | 8.206242724 | 8.207385321 | 7.080892125 | N-acylglucosamine 2-epimerase                                                                                              |
| ACD59460  | 9.285256555 | 9.05604697  | 8.21158172  | fructokinase                                                                                                               |
| ACD59461  | 9.047432054 | 9.034196453 | 7.967341555 | glucose-galactose transporter                                                                                              |
| ACD59462  | 8.35123962  | 8.558956363 | 6.578239833 | transcriptional regulator                                                                                                  |
| ACD59463  | 7.206975262 | 7.660181344 | 6.585970532 | conserved hypothetical protein                                                                                             |
| ACD59464  | 7.79565657  | 8.039527755 | 6.509458329 | nucleoprotein/polynucleotide-associated enzyme                                                                             |
| ACD59465  | 9.688657704 | 10.30548039 | 9.039758032 | conserved domain protein                                                                                                   |
| ACD59466  | 8.365696911 | 8.65442838  | 7.713139027 | UDP-glucose dehydrogenase                                                                                                  |
| ACD59467  | 8.967266613 | 9.404281548 | 8.80116189  | fkbp-type peptidyl-prolyl cis-trans isomerase/x3b rotamase                                                                 |
| ACD59468  | 8.952732512 | 9.198567819 | 9.419109053 | ABC transporter vitamin B12 uptake permease                                                                                |
| ACD59474  | 8.300050489 | 8.433393486 | 7.73603656  | hypothetical protein                                                                                                       |
| ACD59476  | 8.024513613 | 8.455799821 | 7.299849074 | fumarate hydratase class II                                                                                                |
| ACD59482  | 7.282689994 | 7.917604802 | 9.038587076 | ISXoo2 transposase                                                                                                         |
| ACD59483  | 6.737213536 | 7.408091926 | 7.036876927 | conserved hypothetical protein                                                                                             |
| ACD59484  | 10.73697687 | 11.45401134 | 10.83624765 | hypothetical protein                                                                                                       |
| ACD59488  | 7.580032392 | 8.172122435 | 6.480425089 | putative serine protease                                                                                                   |
| ACD59499  | 0           | 0           | 8.310181045 | hypothetical protein                                                                                                       |
| ACD59502  | 6.759502082 | 6.600733606 | 6.633994925 | prephenate dehydrogenase                                                                                                   |
| ACD59503  | 6.079104993 | 6.077272912 | 6.084772254 | pyridoxal kinase                                                                                                           |
| ACD59504  | 7.268088126 | 7.692420223 | 7.008899172 | chaperone protein DnaJ                                                                                                     |
| ACD59505  | 9.513449293 | 10.09976859 | 11.29642299 | chaperone protein DnaK                                                                                                     |
| ACD59506  | 7.438850058 | 8.528856485 | 10.09138249 | co-chaperone GrpE                                                                                                          |
| ACD59507  | 7.187708372 | 7.467181645 | 7.193968819 | heat-inducible transcription repressor HrcA                                                                                |
| ACD59509  | 8.387220353 | 9.292280215 | 8.751818513 | ferric uptake regulator Fur                                                                                                |
| ACD59511  | 7.927594281 | 7.165218555 | 7.134703537 | conserved hypothetical protein                                                                                             |
| ACD59512  | 7.385310232 | 7.774892458 | 6.896065942 | streptomyces cyclase/dehydrase superfamily                                                                                 |
| ACD59514  | 8.419656864 | 8.349953482 | 9.174988081 | serine peptidase                                                                                                           |
| ACD59515  | 9.432640025 | 9.595296649 | 8.236607417 | conserved domain protein                                                                                                   |
| ACD59520  | 6.930382533 | 6.772914953 | 6.745802035 | glycosyltransferase                                                                                                        |
| ACD59521  | 9.55749625  | 9.147408465 | 8.835905131 | glycosyltransferase                                                                                                        |
| ACD59522  | 7.924984667 | 9.978181326 | 10.81202484 | glycosyltransferase                                                                                                        |
| ACD59523  | 10.22755578 | 9.9391193   | 9.441016543 | conserved hypothetical protein                                                                                             |
| ACD59527  | 6.230018514 | 6.269695227 | 5.18464132  | putative PAS/PAC sensor protein                                                                                            |
| ACD59530  | 7.310558254 | 8.215309723 | 7.043650721 | conserved hypothetical protein                                                                                             |
| ACD59533  | 7.224175366 | 7.30492167  | 6.436944686 | multidrug resistance membrane translocase                                                                                  |
| ACD59534  | 7.835734632 | 7.216949518 | 7.815133485 | multidrug resistance efflux pump                                                                                           |
| ACD59535  | 7.626322315 | 7.203445892 | 7.934646235 | outer membrane efflux protein                                                                                              |
| ACD59536  | 7.733801724 | 7.923363144 | 7.489237846 | transcriptional regulator MarR family                                                                                      |
| ACD59539  | 9.554822887 | 10.35770594 | 11.96443834 | bacterioferritin                                                                                                           |
| ACD59545  | 7.578274558 | 7.32978737  | 9.380999946 | asparagine synthase (glutamine-hydrolyzing)                                                                                |
| ACD59546  | 7.378017346 | 7.168912756 | 6.940108008 | succinyl-diaminopimelate desuccinylase                                                                                     |
| ACD59547  | 7.367406014 | 7.484242881 | 6.535465131 | histone acetyltransferase HPA2-related acetyltransferase                                                                   |
| ACD59548  | 7.725632105 | 7.861756906 | 7.1248554   | ArsC family protein                                                                                                        |

|          |             |             |             |                                                    |
|----------|-------------|-------------|-------------|----------------------------------------------------|
| ACD59549 | 8.521329541 | 9.201606908 | 7.35838747  | conserved hypothetical protein                     |
| ACD59550 | 7.752206676 | 7.96374576  | 7.569802455 | 2,3,4,5-tetrahydropyridine-2-carboxylate N-succin  |
| ACD59551 | 7.529750684 | 7.539174324 | 7.061797795 | protein-P-II uridylyltransferase                   |
| ACD59552 | 9.111018267 | 9.36965405  | 10.27052894 | methionine aminopeptidase, type I                  |
| ACD59577 | 6.472361043 | 6.954487147 | 6.650692767 | transposase                                        |
| ACD59584 | 7.956376157 | 8.572976803 | 8.080812199 | conserved hypothetical protein                     |
| ACD59594 | 6.730490516 | 6.442188786 | 7.191394858 | putative ISXoo4 transposase                        |
| ACD59595 | 6.924848125 | 4.005310153 | 2.66982275  | ISXoo8 transposase                                 |
| ACD59596 | 6.650017748 | 6.096871142 | 7.095829503 | conserved hypothetical protein                     |
| ACD59601 | 7.359854959 | 7.757643355 | 7.440395803 | homocysteine S-methyltransferase                   |
| ACD59602 | 7.684292776 | 7.487647126 | 6.824016784 | S-methylmethionine permease                        |
| ACD59603 | 3.709434016 | 5.926065857 | 6.092509801 | ISXoo2 transposase                                 |
| ACD59609 | 7.547411269 | 6.151010448 | 8.419323988 | hypothetical protein                               |
| ACD59610 | 7.386328128 | 8.739557861 | 8.768243884 | hypothetical protein                               |
| ACD59622 | 6.781464633 | 8.480228763 | 7.105688553 | endoribonuclease L-PSP family                      |
| ACD59623 | 7.335801219 | 7.980116723 | 7.110822574 | conserved hypothetical protein                     |
| ACD59624 | 7.558168124 | 7.557264563 | 7.718806834 | conserved hypothetical protein                     |
| ACD59626 | 7.450246245 | 7.570713377 | 7.37503074  | virulence protein                                  |
| ACD59627 | 7.575274508 | 8.068821263 | 7.552461611 | conserved hypothetical protein                     |
| ACD59628 | 7.814159448 | 8.34894056  | 6.397725966 | 2'-5' RNA ligase                                   |
| ACD59629 | 12.22926345 | 12.89075827 | 11.53423478 | conserved hypothetical protein                     |
| ACD59630 | 8.822338197 | 9.106866496 | 9.749324753 | probable acyl-CoA dehydrogenase                    |
| ACD59631 | 7.80870038  | 7.991107968 | 8.018077746 | MFS transporter                                    |
| ACD59634 | 8.121243395 | 8.366199799 | 8.270566317 | alkylphosphonate utilization operon protein PhnA   |
| ACD59644 | 0           | 0           | 8.160295003 | ISXo1 transposase                                  |
| ACD59645 | 6.987912013 | 7.037371239 | 5.411765185 | DnaK suppressor protein                            |
| ACD59647 | 9.314524334 | 8.964571912 | 10.12897383 | hypothetical protein                               |
| ACD59648 | 9.488199658 | 10.66092291 | 10.95515585 | conserved hypothetical protein                     |
| ACD59651 | 7.03178114  | 7.136488772 | 6.496190684 | serine protease                                    |
| ACD59663 | 6.984441246 | 6.689564749 | 6.764858325 | oxidoreductase                                     |
| ACD59664 | 5.827778385 | 5.350299217 | 6.370792009 | oxidoreductase                                     |
| ACD59665 | 9.519223434 | 9.739790734 | 8.550550566 | conserved domain protein                           |
| ACD59666 | 10.23848834 | 10.47951756 | 8.502923275 | purine phosphorylase, family 2                     |
| ACD59667 | 7.693626342 | 7.044689186 | 6.380041941 | hypoxanthine-guanine phosphoribosyltransferase     |
| ACD59668 | 7.221790099 | 7.472520264 | 8.05265499  | beta-hexosaminidase                                |
| ACD59669 | 6.470728821 | 6.52501333  | 5.872621942 | deoxyribodipyrimidine photolyase-related protein   |
| ACD59670 | 6.679409722 | 6.963959565 | 5.724230061 | lipoprotein, putative                              |
| ACD59672 | 6.694545939 | 6.581494365 | 5.537684337 | polyketide synthase                                |
| ACD59673 | 7.850574422 | 6.856450429 | 7.51812594  | adenylate cyclase                                  |
| ACD59674 | 6.617299952 | 6.805073145 | 6.342014202 | 23S rRNA (uracil-5-)-methyltransferase RumA        |
| ACD59677 | 6.633743605 | 7.051807107 | 7.459669316 | DNA repair protein RecO                            |
| ACD59678 | 7.030722305 | 7.088120391 | 6.214536723 | GTP-binding protein Era                            |
| ACD59679 | 7.995902795 | 8.031053274 | 6.4051687   | ribonuclease III                                   |
| ACD59680 | 7.753343794 | 7.579956993 | 6.747749908 | conserved hypothetical protein                     |
| ACD59681 | 7.110300596 | 7.213045879 | 6.235941457 | signal peptidase I                                 |
| ACD59682 | 7.538615759 | 7.806388508 | 7.496821828 | GTP-binding protein LepA                           |
| ACD59683 | 6.890860083 | 7.069100632 | 8.903785462 | periplasmic protease                               |
| ACD59684 | 7.909821097 | 8.339279937 | 11.33218204 | regulatory protein                                 |
| ACD59685 | 8.56722599  | 8.5905122   | 11.66601091 | RNA polymerase sigma-H factor                      |
| ACD59687 | 8.275081565 | 7.927090519 | 8.699444054 | cobalt-zinc-cadmium resistance protein             |
| ACD59688 | 0           | 0           | 7.085148431 | hypothetical protein                               |
| ACD59689 | 6.27358489  | 6.51155343  | 5.539084348 | 3-hydroxyisobutyrate dehydrogenase                 |
| ACD59690 | 6.94646185  | 7.30058136  | 6.722520671 | enoyl-CoA hydratase                                |
| ACD59691 | 7.323451137 | 7.794428864 | 7.889461374 | enoyl-CoA hydratase                                |
| ACD59692 | 6.57075132  | 6.906698223 | 7.043771003 | acyl-CoA dehydrogenase family member 8             |
| ACD59693 | 6.683064786 | 7.093739741 | 7.392051187 | methylmalonate-semialdehyde dehydrogenase          |
| ACD59699 | 7.53439627  | 7.842934847 | 6.94716351  | conserved hypothetical protein                     |
| ACD59700 | 6.616223879 | 6.709331997 | 6.087865891 | F5/8 type C domain protein                         |
| ACD59702 | 8.627949671 | 7.909173056 | 7.589621188 | TnpB                                               |
| ACD59705 | 6.993923393 | 6.721591399 | 6.156091169 | histidine kinase-response regulator hybrid protein |
| ACD59706 | 6.774404925 | 6.786544089 | 5.91750575  | histidine kinase/response regulator hybrid protein |
| ACD59707 | 6.737740834 | 6.591716812 | 5.755632702 | histidine kinase-response regulator hybrid protein |
| ACD59712 | 8.68116812  | 9.440163216 | 7.931334395 | conserved hypothetical protein                     |
| ACD59714 | 7.55628379  | 7.888852817 | 6.713200903 | homoserine dehydrogenase                           |



|          |             |             |              |                                                                                                                                                             |
|----------|-------------|-------------|--------------|-------------------------------------------------------------------------------------------------------------------------------------------------------------|
| ACD59715 | 7.169083184 | 7.461520374 | 6.142047816  | O-succinylhomoserine (thiol)-lyase                                                                                                                          |
| ACD59716 | 7.590070506 | 7.723701896 | 6.572365232  | homoserine O-acetyltransferase                                                                                                                              |
| ACD59725 | 9.262552958 | 9.461313681 | 7.967358848  | CBS domain protein                                                                                                                                          |
| ACD59726 | 7.264939834 | 6.935176839 | 6.288245963  | SfilI prophage-derived bactoprenol glucosyl transferase                                                                                                     |
| ACD59727 | 7.515534274 | 7.350815454 | 6.472726576  | monofunctional biosynthetic peptidoglycan transglycosylase                                                                                                  |
| ACD59731 | 6.745802035 | 7.331812684 | 6.82822536   | transcriptional regulator                                                                                                                                   |
| ACD59734 | 7.565155405 | 8.239803762 | 7.137667457  | conserved hypothetical protein                                                                                                                              |
| ACD59735 | 7.177180315 | 6.996004519 | 6.393790281  | membrane protein, putative                                                                                                                                  |
| ACD59737 | 11.98215223 | 12.2998176  | 12.74955941  | hypothetical protein                                                                                                                                        |
| ACD59739 | 8.377340692 | 8.05646973  | 8.936838136  | glycine cleavage system H protein                                                                                                                           |
| ACD59740 | 7.259018204 | 7.520956481 | 6.989422885  | glycine cleavage system T protein                                                                                                                           |
| ACD59741 | 9.163214412 | 9.8371091   | 8.021973793  | nodulation protein nfd, C-terminal only                                                                                                                     |
| ACD59742 | 6.726027377 | 6.836050355 | 6.093887602  | inner membrane protein                                                                                                                                      |
| ACD59743 | 8.983891416 | 8.712179611 | 6.996851944  | membrane protein YnfA                                                                                                                                       |
| ACD59744 | 6.861434352 | 7.070936675 | 6.244736771  | MazG family protein                                                                                                                                         |
| ACD59745 | 7.729138065 | 7.437427507 | 6.70354372   | 3'(2'),5'-bisphosphate nucleotidase                                                                                                                         |
| ACD59746 | 8.319496007 | 8.361829757 | 6.591253043  | ADP compounds hydrolase NudE                                                                                                                                |
| ACD59749 | 6.962687826 | 7.344721995 | 6.405456353  | glucokinase                                                                                                                                                 |
| ACD59756 | 7.049064381 | 7.03115255  | 6.202735064  | colicin V secretion/processing ATP-binding protein CvaB                                                                                                     |
| ACD59757 | 3.915865041 | 4.381511804 | 5.217381959  | peptidase, S54 (rhomboid) family, putative                                                                                                                  |
| ACD59760 | 11.849925   | 8.785364187 | 12.72231659  | hypothetical protein                                                                                                                                        |
| ACD59761 | 0           | 0           | 0            | hypothetical protein                                                                                                                                        |
| ACD59762 | 6.645038715 | 6.4180398   | 6.565853037  | membrane-fusion protein                                                                                                                                     |
| ACD59763 | 8.220165475 | 8.415306571 | 7.871572625  | hypothetical protein                                                                                                                                        |
| ACD59764 | 7.718724652 | 8.303680304 | 6.241491287  | membrane-fusion protein                                                                                                                                     |
| ACD59767 | 6.803627442 | 7.285929261 | 8.367628792  | conserved hypothetical protein                                                                                                                              |
| ACD59769 | 7.544864001 | 7.093993207 | 7.406740734  | RebB protein                                                                                                                                                |
| ACD59772 | 8.979753855 | 8.685708929 | 8.479877249  | copper homeostasis protein                                                                                                                                  |
| ACD59773 | 7.347196137 | 7.321414043 | 7.3763338    | N(4)-(Beta-N-acetylglucosaminy)-L-asparaginase (Glycosylasparaginase) (Aspartylglucosaminidase) (N4-(N-acetyl-beta-glucosaminy)-L-asparagine amidase) (AGA) |
| ACD59774 | 4.541874106 | 5.164150696 | 3.104425567  | ISXo2 putative transposase                                                                                                                                  |
| ACD59780 | 7.849661557 | 7.347373332 | 6.351912727  | ribosomal protein alanine acetyltransferase                                                                                                                 |
| ACD59781 | 4.053033116 | 7.045868849 | 0            | conserved hypothetical protein, putative                                                                                                                    |
| ACD59782 | 5.949000243 | 6.636249036 | -4.370268689 | glutamate methyltransferase                                                                                                                                 |
| ACD59783 | 8.193382439 | 8.378442261 | 6.965022341  | PilL protein                                                                                                                                                |
| ACD59785 | 7.184181096 | 7.525035261 | 6.666373148  | pilus biogenesis protein                                                                                                                                    |
| ACD59786 | 7.61225665  | 7.760939453 | 6.570472039  | pilus biogenesis protein                                                                                                                                    |
| ACD59787 | 9.921775494 | 10.55754029 | 7.07480511   | PilH                                                                                                                                                        |
| ACD59788 | 10.6454603  | 11.46971812 | 10.05540446  | type IV pilus response regulator PilG                                                                                                                       |
| ACD59791 | 8.04094721  | 7.870081085 | 8.444033397  | dinitrogenase reductase activation glycohydrolase                                                                                                           |
| ACD59792 | 7.525638256 | 7.430360551 | 8.810089585  | glycoprotease family protein                                                                                                                                |
| ACD59793 | 6.766131326 | 6.654449862 | 6.27306078   | ATP-dependent helicase                                                                                                                                      |
| ACD59794 | 6.46280489  | 6.482474011 | 5.475927939  | lipoprotein, putative                                                                                                                                       |
| ACD59795 | 6.811252657 | 7.001036565 | 6.684229648  | penicillin-binding protein 1B                                                                                                                               |
| ACD59797 | 7.542296748 | 7.519219501 | 7.854513119  | tetratricopeptide repeat domain protein                                                                                                                     |
| ACD59798 | 7.168802469 | 7.569946723 | 6.868625039  | GTP pyrophosphokinase (ATPx3aGTP 3'-pyrophosphotransferase)(ppGpp synthetase I) ((P)ppGpp synthetase)                                                       |
| ACD59807 | 5.86537696  | 7.288496992 | 5.958448316  | putative chemotaxis protein CheX                                                                                                                            |
| ACD59811 | 6.816394909 | 6.821340311 | 6.212544049  | ATP-dependent helicase HrpA                                                                                                                                 |
| PXO_ma28 | 0           | 0           | 0            | XO_ma28 cdna:pseudogene<br>chromosome:GCA_000019585.1:Chromosome:3342212:3342287:-1<br>gene:PXO_ma28 transcript:PXO_ma2                                     |
| ACD59817 | 6.433692257 | 6.9912724   | 6.434551504  | ExsB protein                                                                                                                                                |
| ACD59821 | 4.367091446 | 0           | 0            | ISXoo13 transposase                                                                                                                                         |
| ACD59822 | 8.23329851  | 8.417371536 | 8.217405225  | radical activating enzyme                                                                                                                                   |
| ACD59823 | 9.222410938 | 9.300871883 | 8.794253392  | tol-pal system protein YbgF, putative                                                                                                                       |
| ACD59824 | 9.473425706 | 10.12639474 | 9.891192837  | outer membrane protein P6                                                                                                                                   |
| ACD59825 | 7.985893156 | 8.700002682 | 9.281204441  | Tol-Pal system beta propeller repeat protein TolB                                                                                                           |
| ACD59826 | 7.876197677 | 7.913685293 | 9.259818574  | protein TolA                                                                                                                                                |
| ACD59827 | 7.016407174 | 7.20630134  | 7.988474515  | protein TolR                                                                                                                                                |
| ACD59828 | 7.499925592 | 7.569111289 | 8.731906173  | protein TolQ                                                                                                                                                |
| ACD59829 | 9.172294985 | 9.956345662 | 11.50507216  | thioesterase family protein                                                                                                                                 |
| ACD59830 | 6.067647321 | 6.508539576 | 5.847859143  | holliday junction DNA helicase RuvB                                                                                                                         |
| ACD59831 | 7.585413272 | 7.550631365 | 6.441380559  | potassium uptake protein                                                                                                                                    |

|          |             |             |             |                                                    |
|----------|-------------|-------------|-------------|----------------------------------------------------|
| ACD59832 | 7.961310772 | 8.166449333 | 7.194993181 | holliday junction DNA helicase RuvA                |
| ACD59833 | 7.557425408 | 7.554780687 | 7.054522922 | crossover junction endodeoxyribonuclease RuvC      |
| ACD59834 | 7.847777731 | 8.232065906 | 8.350086127 | conserved hypothetical protein                     |
| ACD59835 | 6.681814672 | 7.121212307 | 6.358834026 | conserved hypothetical protein                     |
| ACD59836 | 8.242612032 | 7.73752453  | 8.069385318 | acetyltransferase                                  |
| ACD59837 | 7.409815196 | 7.16629366  | 7.785158177 | aspartyl-tRNA synthetase                           |
| ACD59839 | 10.50872575 | 10.43878146 | 11.3276593  | hypothetical protein                               |
| ACD59840 | 8.941379256 | 8.350046334 | 9.714367455 | putative regulatory protein, FmdB family           |
| ACD59846 | 7.043289817 | 7.083266564 | 6.340320138 | membrane protein, putative                         |
| ACD59847 | 0           | 0           | 0           | hypothetical protein                               |
| ACD59851 | 0           | 4.009409881 | 3.932458085 | ISXo8 transposase                                  |
| ACD59864 | 7.474517164 | 7.334890015 | 7.410968551 | conserved hypothetical protein                     |
| ACD59865 | 10.00894678 | 10.13210125 | 11.24029048 | protein GntY                                       |
| ACD59871 | 6.982594355 | 7.218296831 | 6.892148128 | ribosomal large subunit pseudouridine synthase C   |
| ACD59873 | 6.746433703 | 6.365940943 | 6.086932341 | ISXoo11 transposase                                |
| ACD59874 | 6.794142898 | 6.739834604 | 8.264320611 | ISXoo12 transposase                                |
| ACD59875 | 7.493190976 | 7.471472004 | 6.701978697 | transcriptional regulator LuxR/uhpA family         |
| ACD59876 | 7.46760555  | 7.313563311 | 7.83622713  | rhodanese domain protein                           |
| ACD59877 | 8.589044357 | 8.394522716 | 8.2526134   | conserved hypothetical protein                     |
| ACD59880 | 6.26283527  | 6.327595756 | 5.463190839 | VI polysaccharide biosynthesis protein VipA/tviB   |
| ACD59881 | 9.321425318 | 0           | 7.860969004 | hypothetical protein                               |
| ACD59887 | 5.324454205 | 1.196808453 | 2.085849516 | ISXoo13 transposase                                |
| ACD59889 | 10.30562859 | 10.87239016 | 10.04401154 | conserved hypothetical protein                     |
| ACD59891 | 0           | 0           | 2.984736984 | ISXo1 transposase                                  |
| ACD59897 | 10.19262571 | 10.5881993  | 9.417806112 | conserved domain protein                           |
| ACD59898 | 0           | 0           | 2.722065949 | transposase                                        |
| ACD59899 | 7.841935391 | 7.865974473 | 7.576559928 | nitrate transport ATP-binding protein              |
| ACD59900 | 6.398278535 | 7.954940735 | 6.815882789 | histidine kinase/response regulator hybrid protein |
| ACD59901 | 10.17758149 | 9.919828685 | 8.291502262 | conserved domain protein                           |
| ACD59906 | 0           | 0           | 10.25731712 | transcriptional regulator, AraC family             |
| ACD59907 | 5.424404828 | 5.777603822 | 5.122656155 | AraC-type DNA-binding domain-containing protein    |
| ACD59908 | 7.301679092 | 7.100620293 | 7.515928444 | transcriptional regulator, AraC family             |
| ACD59909 | 7.216309347 | 6.709924709 | 6.533092963 | conserved hypothetical protein                     |
| ACD59910 | 6.375788395 | 6.497481438 | 5.801021521 | molybdopterin guanine dinucleotide synthase        |
| ACD59911 | 6.802348337 | 6.873800897 | 5.961125522 | molybdopterin biosynthesis                         |
| ACD59912 | 9.013534839 | 7.787693647 | 10.17033821 | hypothetical protein                               |
| ACD59915 | 9.224787946 | 10.2595432  | 7.16919345  | exodeoxyribonuclease III                           |
| ACD59920 | 7.365465086 | 7.10867081  | 6.747159107 | conserved hypothetical protein                     |
| ACD59924 | 9.987022358 | 8.646648707 | 10.11318217 | lipoprotein, putative                              |
| ACD59925 | 7.30543251  | 6.732459158 | 6.568541398 | peptidase                                          |
| ACD59926 | 7.179958837 | 7.164102412 | 6.475200022 | xylosidase\x3b arabinosidase                       |
| ACD59927 | 6.84393361  | 6.663045687 | 6.13029461  | conserved hypothetical protein                     |
| ACD59928 | 7.136191386 | 6.769599854 | 6.875386905 | TonB-dependent outer membrane receptor             |
| ACD59931 | 6.609765303 | 6.273403991 | 6.38407399  | conserved hypothetical protein                     |
| ACD59935 | 7.930382533 | 8.624908747 | 8.747182609 | conserved hypothetical protein                     |
| ACD59936 | 7.222002712 | 6.89251246  | 6.921019706 | peptidase                                          |
| ACD59937 | 7.353358582 | 7.459464407 | 6.798024585 | amino acid permease                                |
| ACD59938 | 6.394250026 | 6.191479744 | 6.404637496 | conserved hypothetical protein                     |
| ACD59939 | 7.301989965 | 6.277190675 | 7.150204239 | lipoprotein, putative                              |
| ACD59940 | 6.622781038 | 6.072174417 | 6.90480921  | proline dipeptidase                                |
| ACD59941 | 6.415229658 | 6.546226191 | 7.526131427 | ketoglutarate semialdehyde dehydrogenase           |
| ACD59942 | 7.017855115 | 6.759821621 | 8.597136331 | dihydrodipicolinate synthetase                     |
| ACD59943 | 6.131048208 | 5.785553167 | 7.064494885 | oxidoreductase                                     |
| ACD59944 | 8.131877534 | 8.238017739 | 8.453970202 | sarcosine oxidase alpha subunit                    |
| ACD59945 | 6.114035883 | 5.781094758 | 7.175514621 | D-amino acid oxidase                               |
| ACD59946 | 6.602194065 | 6.470051981 | 7.739699614 | proline racemase                                   |
| ACD59949 | 7.507961095 | 7.100410042 | 7.977995369 | hypothetical protein                               |
| ACD59954 | 11.24299542 | 8.781720342 | 9.465731683 | hypothetical protein                               |
| ACD59955 | 6.147320947 | 6.457259384 | 6.444496459 | sensor histidine kinase                            |
| ACD59961 | 7.213590303 | 7.465811254 | 6.879632258 | conserved hypothetical protein                     |
| ACD59963 | 10.64844747 | 9.782223433 | 11.75084095 | hypothetical protein                               |
| ACD59964 | 8.613483769 | 8.587297476 | 8.751540712 | conserved hypothetical protein                     |
| ACD59966 | 7.077296415 | 7.023743266 | 6.433625498 | conserved hypothetical protein                     |
| ACD59967 | 7.537932775 | 8.068407482 | 7.315403201 | conserved hypothetical protein                     |

|           |             |             |             |                                                                                                                            |
|-----------|-------------|-------------|-------------|----------------------------------------------------------------------------------------------------------------------------|
| ACD59971  | 7.602305433 | 7.403881215 | 8.764038899 | ISXoo2 transposase                                                                                                         |
| PXO_rna30 | 0           | 0           | 0           | XO_rna30 cdna:pseudogene<br>chromosome:GCA_000019585.1:Chromosome:3494266:3494341:-1<br>gene:PXO_rna30 transcript:PXO_rna3 |
| ACD59973  | 7.530804267 | 7.154463719 | 7.173657151 | serine peptidase                                                                                                           |
| ACD59974  | 6.95182089  | 6.632982115 | 7.432642113 | GumN Protein                                                                                                               |
| ACD59975  | 8.349060024 | 8.214702817 | 8.75033852  | conserved hypothetical protein                                                                                             |
| ACD59976  | 8.707790496 | 8.606246036 | 7.568693391 | exopolysaccharide xanthan biosynthesis glycosyltransferase GumM                                                            |
| ACD59977  | 8.261643639 | 8.296994188 | 7.76059355  | exopolysaccharide xanthan biosynthesis pyruvyltransferase GumL                                                             |
| ACD59978  | 7.906289347 | 7.909515114 | 7.193929406 | exopolysaccharide xanthan biosynthesis glucuronosyltransferase GumK                                                        |
| ACD59979  | 8.366483962 | 8.469124878 | 6.71781349  | exopolysaccharide xanthan biosynthesis protein GumJ                                                                        |
| ACD59980  | 7.739659115 | 7.7420736   | 6.642077694 | exopolysaccharide xanthan biosynthesis glycosyltransferase GumI                                                            |
| ACD59981  | 7.763132676 | 7.897676073 | 6.843908492 | exopolysaccharide xanthan biosynthesis glycosyltransferase GumH                                                            |
| ACD59982  | 8.027043438 | 8.298768273 | 7.066035358 | exopolysaccharide xanthan biosynthesis acetyltransferase GumG                                                              |
| ACD59983  | 8.348533422 | 8.264428525 | 7.604404968 | exopolysaccharide xanthan biosynthesis acetyltransferase GumF                                                              |
| ACD59984  | 7.821378582 | 8.244596931 | 7.096788934 | exopolysaccharide xanthan biosynthesis polymerase GumE                                                                     |
| ACD59986  | 9.662855264 | 9.719601017 | 9.716864036 | exopolysaccharide xanthan biosynthesis glycosyltransferase GumD                                                            |
| ACD59987  | 8.416379539 | 8.85640374  | 7.851923903 | exopolysaccharide xanthan biosynthesis chain length determinant protein GumC                                               |
| ACD59988  | 8.776360649 | 9.410659102 | 8.874932181 | exopolysaccharide xanthan biosynthesis export protein GumB                                                                 |
| PXO_rna31 | 0           | 0           | 0           | XO_rna31 cdna:pseudogene<br>chromosome:GCA_000019585.1:Chromosome:3515163:3515239:-1<br>gene:PXO_rna31 transcript:PXO_rna3 |
| ACD59989  | 8.771264959 | 9.124028232 | 7.641285904 | transcription regulator protein                                                                                            |
| ACD59990  | 9.508488077 | 10.17155212 | 7.982942253 | integration host factor, alpha subunit                                                                                     |
| ACD59991  | 7.054240716 | 6.746877049 | 6.060438709 | phenylalanyl-tRNA synthetase, beta subunit                                                                                 |
| ACD59992  | 7.26516494  | 7.318931393 | 6.869674034 | phenylalanyl-tRNA synthetase, alpha subunit                                                                                |
| ACD59993  | 7.51843285  | 8.619471703 | 8.465509267 | ribosomal protein L20                                                                                                      |
| ACD59994  | 11.0115767  | 11.76590764 | 11.40504571 | ribosomal protein L35                                                                                                      |
| ACD59995  | 9.95434319  | 10.92878483 | 8.581193048 | translation initiation factor IF-3                                                                                         |
| ACD59996  | 7.514816607 | 7.865949736 | 7.128128399 | threonyl-tRNA synthetase                                                                                                   |
| ACD59998  | 9.826313315 | 9.82767297  | 9.720550382 | integrase core domain protein                                                                                              |
| ACD60002  | 9.358385272 | 9.125444468 | 7.224725253 | conserved domain protein                                                                                                   |
| PXO_rna32 | 0           | 0           | 0           | XO_rna32 cdna:pseudogene<br>chromosome:GCA_000019585.1:Chromosome:3526449:3526523:-1<br>gene:PXO_rna32 transcript:PXO_rna3 |
| ACD60004  | 6.931293023 | 6.993832841 | 6.134896531 | excinuclease ABC, B subunit                                                                                                |
| ACD60005  | 11.14588121 | 8.513617071 | 0           | hypothetical protein                                                                                                       |
| ACD60007  | 7.740414919 | 7.438018327 | 7.931943021 | conserved hypothetical protein                                                                                             |
| ACD60008  | 0           | 0           | 0           | conserved hypothetical protein                                                                                             |
| ACD60009  | 3.350200191 | 2.584505575 | 2.948892347 | ISXoo6 transposase                                                                                                         |
| ACD60010  | 6.143321984 | 6.010003241 | 6.111265063 | conserved hypothetical protein                                                                                             |
| ACD60011  | 7.282541739 | 7.544763562 | 7.37313486  | conserved hypothetical protein                                                                                             |
| ACD60014  | 0           | 0           | 0           | DNA methylase                                                                                                              |
| ACD60015  | 7.247937005 | 6.05022088  | 7.037327307 | phage portal protein, pbsx family                                                                                          |
| ACD60016  | 6.044098992 | 5.437267695 | 5.408249907 | phage terminase, ATPase subunit                                                                                            |
| ACD60042  | 0           | 0           | 0           | phage-related protei                                                                                                       |
| ACD60043  | 0           | 0           | 0           | hypothetical protein                                                                                                       |
| PXO_rna33 | 0           | 0           | 0           | XO_rna33 cdna:pseudogene<br>chromosome:GCA_000019585.1:Chromosome:3571806:3571882:-1<br>gene:PXO_rna33 transcript:PXO_rna3 |
| ACD60056  | 11.41639115 | 11.33343492 | 9.713097775 | type IV pilin                                                                                                              |
| ACD60057  | 9.054389967 | 9.15763494  | 7.595660298 | PilY1                                                                                                                      |
| ACD60058  | 9.178166855 | 9.421246446 | 7.151219542 | PilX                                                                                                                       |
| ACD60059  | 9.596694797 | 9.810092799 | 7.209775012 | prepilin-type N-terminal cleavage/methylation domain protein                                                               |
| ACD60060  | 8.669622095 | 9.336477549 | 6.626789546 | type IV pilus modification protein PilV                                                                                    |
| ACD60061  | 9.613010365 | 9.805516569 | 7.401041624 | pre-pilin like leader sequence                                                                                             |
| ACD60062  | 7.390616101 | 7.657411351 | 6.660281193 | decarboxylase family protein                                                                                               |
| ACD60063  | 6.459682429 | 6.191416574 | 6.792191622 | TonB-dependent outer membrane Receptor/Oar-like                                                                            |
| ACD60064  | 7.317801501 | 7.729430411 | 7.006455123 | multiple antibiotic resistance protein MarC                                                                                |
| ACD60065  | 6.447362644 | 7.297787524 | 6.236178789 | short chain dehydrogenase                                                                                                  |
| ACD60066  | 8.501363505 | 8.052111533 | 7.553859646 | putative glutaredoxin homolog                                                                                              |
| ACD60068  | 7.327552644 | 7.531771325 | 6.527195477 | phosphoribosylaminoimidazole carboxylase, ATPase subunit                                                                   |
| ACD60069  | 7.140901329 | 7.443192215 | 7.782402012 | phosphoribosylaminoimidazole carboxylase, catalytic subunit                                                                |
| ACD60073  | 8.368096075 | 8.396805974 | 7.898208353 | polyribonucleotide nucleotidyltransferase                                                                                  |
| ACD60074  | 11.31936165 | 11.76082804 | 12.09673821 | ribosomal protein S15                                                                                                      |
| ACD60075  | 6.725113999 | 6.797804167 | 6.115376641 | tRNA pseudouridine synthase B                                                                                              |

|          |             |             |              |                                                                                                                         |
|----------|-------------|-------------|--------------|-------------------------------------------------------------------------------------------------------------------------|
| ACD60076 | 7.435370233 | 6.962063107 | 5.141162996  | ribosome-binding factor A                                                                                               |
| ACD60077 | 8.209253519 | 8.37390047  | 7.945830064  | translation initiation factor IF-2                                                                                      |
| ACD60078 | 7.827876172 | 8.153739481 | 7.569491092  | N utilization substance protein A                                                                                       |
| ACD60079 | 8.431948833 | 8.44872754  | 7.599481457  | YhbC family protein                                                                                                     |
| PXO_ma34 | 0           | 0           | 0            | XO_ma34 cDNA:pseudogene<br>chromosome:GCA_000019585.1:Chromosome:3600803:3600879:-1<br>gene:PXO_ma34 transcript:PXO_ma3 |
| ACD60080 | 8.57219998  | 8.454480262 | 7.477952501  | NADH-ubiquinone oxidoreductase Nqo14 subunit                                                                            |
| ACD60081 | 8.056518502 | 7.950474247 | 6.039149363  | NADH-ubiquinone oxidoreductase Nqo13 subunit                                                                            |
| ACD60082 | 9.439257431 | 9.395587687 | 8.933327723  | NADH-quinone oxidoreductase chain I                                                                                     |
| ACD60083 | 9.379917652 | 9.047042093 | 8.308461904  | NADH-quinone oxidoreductase chain 11                                                                                    |
| ACD60084 | 8.529653091 | 8.772891866 | 7.460169172  | NADH-ubiquinone oxidoreductase Nqo10 subunit                                                                            |
| ACD60085 | 7.821901507 | 7.912404366 | 7.345094718  | NADH-quinone oxidoreductase chain 9                                                                                     |
| ACD60086 | 9.387866548 | 9.527664662 | 8.886675122  | NADH-ubiquinone oxidoreductase chain 1                                                                                  |
| ACD60087 | 8.05435469  | 8.097616063 | 7.507120697  | NADH-quinone oxidoreductase, chain g                                                                                    |
| ACD60088 | 7.959236927 | 7.862934854 | 7.728240262  | NADH-quinone oxidoreductase, f subunit                                                                                  |
| ACD60089 | 8.918484629 | 8.824522844 | 9.540207486  | NADH-ubiquinone oxidoreductase Nqo2 subunit                                                                             |
| ACD60090 | 7.809079972 | 7.870050252 | 7.813178339  | NADH dehydrogenase i, d subunit                                                                                         |
| ACD60091 | 7.911290112 | 7.538910584 | 7.952665544  | NADH-quinone oxidoreductase chain c                                                                                     |
| ACD60092 | 8.160365602 | 8.937011814 | 8.373191425  | NADH-ubiquinone oxidoreductase 20 kda subunit                                                                           |
| ACD60093 | 10.59164389 | 10.89471168 | 11.34911533  | NADH-quinone oxidoreductase chain a                                                                                     |
| PXO_ma35 | 0           | 0           | 0            | XO_ma35 cDNA:pseudogene<br>chromosome:GCA_000019585.1:Chromosome:3616006:3616090:-1<br>gene:PXO_ma35 transcript:PXO_ma3 |
| ACD60094 | 8.874723207 | 9.55661909  | 9.050469047  | preprotein translocase subunit SecG                                                                                     |
| ACD60095 | 7.461160177 | 7.636769608 | 6.543737137  | triosephosphate isomerase                                                                                               |
| ACD60097 | 6.81548577  | 7.311503115 | 7.39516565   | cyanoglobin                                                                                                             |
| ACD60098 | 9.699648794 | 11.4260498  | 10.09821636  | conserved hypothetical protein                                                                                          |
| ACD60102 | 11.61886265 | 11.72496569 | 8.519140856  | hypothetical protein                                                                                                    |
| ACD60103 | 8.052350679 | 8.451660338 | 5.985511815  | Putative signal protein with HAMP, GGDEF and EAL domains                                                                |
| ACD60104 | 9.232459303 | 9.943852483 | 7.377653034  | conserved hypothetical protein                                                                                          |
| ACD60105 | 8.311766476 | 8.338455615 | 7.344979361  | oxidoreductase                                                                                                          |
| ACD60107 | 7.460578761 | 7.704194159 | 4.248671449  | phosphoglucosamine mutase                                                                                               |
| ACD60108 | 7.80830138  | 8.313259459 | 7.824379638  | acetyl-CoA carboxylase, carboxyl transferase, beta subunit                                                              |
| ACD60109 | 6.863442934 | 6.42786928  | 6.725318537  | tryptophan synthase, alpha subunit                                                                                      |
| ACD60110 | 7.984800089 | 9.183672596 | 8.524996097  | putative membrane protein                                                                                               |
| ACD60111 | 8.540306306 | 8.464986762 | 9.250158643  | tryptophan synthase, beta subunit                                                                                       |
| ACD60113 | 8.718094436 | 9.780401971 | 9.953829773  | N-(5-phosphoribosyl)anthranilate isomerase                                                                              |
| ACD60114 | 7.915831587 | 8.317783416 | 8.215426219  | tRNA pseudouridine synthase A                                                                                           |
| ACD60115 | 10.06501215 | 10.87318262 | 10.14296221  | glyoxalase family protein                                                                                               |
| ACD60116 | 9.661013801 | 9.892705215 | 9.272844366  | conserved hypothetical protein                                                                                          |
| ACD60117 | 6.79301148  | 7.200437653 | 6.666614587  | FimV                                                                                                                    |
| ACD60119 | 7.301477904 | 7.385292974 | 6.6574971    | aspartate-semialdehyde dehydrogenase                                                                                    |
| ACD60120 | 7.242202337 | 7.061743801 | 6.47938741   | glyoxylate reductase                                                                                                    |
| ACD60121 | 7.386604044 | 7.670401321 | 6.772175989  | chorismate synthase                                                                                                     |
| ACD60122 | 7.08329848  | 6.842061147 | 7.238719996  | modification methylase, HemK family                                                                                     |
| ACD60125 | 6.878259406 | 7.000811288 | 6.83960693   | membrane-bound lytic murein transglycosylase D                                                                          |
| ACD60128 | 4.672425342 | 5.023530379 | 4.448689552  | transposase                                                                                                             |
| ACD60129 | 0           | 2.179794466 | -0.427139428 | IS1112 transposase                                                                                                      |
| ACD60131 | 7.08676254  | 6.365389845 | 6.332525348  | conserved hypothetical protein                                                                                          |
| ACD60136 | 7.231432408 | 7.166132948 | 6.850024271  | deoxycytidine triphosphate deaminase                                                                                    |
| ACD60137 | 6.789716212 | 7.049271356 | 6.139209567  | conserved hypothetical protein                                                                                          |
| ACD60138 | 6.095394913 | 5.760867619 | 6.133043546  | transposase                                                                                                             |
| ACD60140 | 7.986211811 | 8.664457951 | 8.891829261  | peptidase, S54 (rhomboid) family, putative                                                                              |
| ACD60141 | 4.435495252 | 5.5127926   | 5.169772709  | methylated-DNA-protein-cysteine S-methyltransferase related protein                                                     |
| ACD60142 | 10.17507544 | 8.621916332 | 8.08418654   | glutathione reductase                                                                                                   |
| ACD60143 | 2.08971847  | 2.675858828 | 1.093174775  | ISXoo10 transposase                                                                                                     |
| ACD60144 | 7.643387238 | 7.083692059 | 7.398367474  | reductase                                                                                                               |
| ACD60145 | 8.773182075 | 7.570015055 | 7.820600219  | reductase                                                                                                               |
| ACD60146 | 7.598447093 | 6.98414499  | 6.295552227  | D-amino acid dehydrogenase subunit                                                                                      |
| ACD60147 | 7.72389981  | 7.725229907 | 6.461183102  | transport protein                                                                                                       |
| ACD60148 | 7.267339156 | 8.574370247 | 7.614113505  | peptidyl-prolyl cis-trans isomerase                                                                                     |
| ACD60152 | 6.486065915 | 6.448578885 | 6.120548937  | acyl-CoA thioester hydrolase                                                                                            |
| ACD60153 | 7.349515668 | 6.792048425 | 6.410746432  | conserved hypothetical protein                                                                                          |
| ACD60154 | 8.527883562 | 8.850402522 | 8.146232623  | conserved hypothetical protein                                                                                          |

|          |             |             |              |                                                                                                                          |
|----------|-------------|-------------|--------------|--------------------------------------------------------------------------------------------------------------------------|
| ACD60155 | 7.010052491 | 6.949593293 | 7.611541271  | glutamate symport protein                                                                                                |
| ACD60162 | 7.595503661 | 7.566023585 | 7.989564803  | conserved hypothetical protein                                                                                           |
| ACD60163 | 9.819639447 | 10.23981331 | 9.561033947  | conserved hypothetical protein                                                                                           |
| ACD60164 | 7.486086838 | 7.161283075 | 6.754647033  | PmbA                                                                                                                     |
| ACD60166 | 11.78357534 | 12.37972492 | 13.06953368  | conserved hypothetical protein                                                                                           |
| ACD60167 | 8.814399814 | 8.72316944  | 10.10227757  | TldD                                                                                                                     |
| ACD60169 | 6.350357568 | 6.238471618 | 6.000085657  | conserved hypothetical protein                                                                                           |
| ACD60170 | 7.637733402 | 7.735434172 | 7.508872295  | ribonuclease G                                                                                                           |
| ACD60171 | 8.063848043 | 7.386216022 | 7.578636862  | septum formation protein Maf                                                                                             |
| ACD60176 | 6.776025006 | 7.193239504 | 6.780388847  | conserved hypothetical protein                                                                                           |
| ACD60178 | 8.413259804 | 8.45450905  | 7.678987388  | DnaJ domain protein                                                                                                      |
| ACD60179 | 9.320491447 | 9.557115192 | 8.868350323  | domain of unknown function superfamily                                                                                   |
| ACD60180 | 6.342686294 | 6.268571006 | 6.114227497  | nicotinate (nicotinamide) nucleotide adenyllyltransferase                                                                |
| ACD60181 | 6.753577796 | 6.93228563  | 6.16654072   | DNA polymerase III, delta subunit                                                                                        |
| ACD60182 | 7.776321166 | 8.244663523 | 8.668544652  | lipoprotein                                                                                                              |
| ACD60183 | 7.413678697 | 7.469991766 | 7.934080042  | leucyl-tRNA synthetase                                                                                                   |
| ACD60184 | 7.54280747  | 7.552845822 | 6.684608376  | membrane protein, putative                                                                                               |
| ACD60187 | 2.964766422 | 2.566386543 | 2.544646116  | ISXo5 transposase                                                                                                        |
| ACD60190 | 9.599155972 | 8.011557136 | 9.570658359  | hypothetical protein                                                                                                     |
| ACD60193 | 9.047612    | 8.550596737 | 7.747971396  | conserved hypothetical protein                                                                                           |
| ACD60195 | 0           | 0           | -0.975280337 | ISXo8 transposase                                                                                                        |
| ACD60197 | 3.956251849 | 2.872458437 | 2.138109984  | ISXo5 transposase                                                                                                        |
| ACD60208 | 8.351681327 | 9.015440143 | 8.627876735  | virulence regulator                                                                                                      |
| ACD60209 | 8.982625726 | 9.141141533 | 10.32110507  | conserved hypothetical protein                                                                                           |
| ACD60210 | 10.34219693 | 9.864457012 | 9.387739486  | transposase                                                                                                              |
| ACD60212 | 7.066971764 | 8.092545742 | 7.747655933  | ISXoo3 transposase ORF A                                                                                                 |
| PXO_ma36 | 0           | 0           | 0            | XO_ma36 cDNA:pseudogene<br>chromosome:GCA_000019585.1:Chromosome:3730177:3730250:-1<br>gene:PXO_ma36 transcript:PXO_ma36 |
| ACD60216 | 9.221625786 | 9.450557629 | 8.577500583  | lipase/x3b esterase                                                                                                      |
| ACD60221 | 8.335001713 | 8.70752134  | 8.482021368  | rieske [2Fe-2S] domain, putative                                                                                         |
| ACD60232 | 6.407288162 | 6.280408891 | 5.88448803   | carboxylesterase                                                                                                         |
| ACD60233 | 7.197246186 | 7.537187333 | 6.537212187  | tRNA/rRNA methyltransferase                                                                                              |
| ACD60234 | 11.09669539 | 10.56672955 | 10.83016657  | conserved domain protein                                                                                                 |
| ACD60235 | 0           | 9.378442261 | 8.864167569  | acetyltransferase                                                                                                        |
| ACD60236 | 8.979782431 | 9.056542887 | 0            | acetyltransferase                                                                                                        |
| ACD60237 | 0           | 0           | 0            | ISXo5 transposase                                                                                                        |
| ACD60239 | 6.798063479 | 6.776196128 | 5.909300287  | aminopeptidase N                                                                                                         |
| ACD60240 | 6.896308182 | 7.01108186  | 5.90408664   | acriflavin resistance protein                                                                                            |
| ACD60241 | 6.910552793 | 6.682573297 | 5.818559171  | RND efflux membrane fusion protein                                                                                       |
| ACD60244 | 6.843745217 | 7.285522438 | 6.35910119   | CysN/CysC bifunctional enzyme required for AvrXa21 activity Q (raxQ)                                                     |
| ACD60245 | 7.02986143  | 6.781267903 | 6.066138715  | sulfate adenyllyltransferase subunit 2 required for AvrXa21 activity P (raxP)/ATP sulfurylase small subunit RaxP         |
| ACD60249 | 7.198189631 | 7.387939765 | 6.76915021   | sulfite reductase [NADPH] flavoprotein alpha-component                                                                   |
| ACD60250 | 6.74387845  | 6.847270367 | 6.393568933  | TonB-dependent receptor                                                                                                  |
| ACD60251 | 8.476410042 | 9.27290267  | 8.926998637  | conserved hypothetical protein                                                                                           |
| ACD60253 | 8.926859322 | 9.117910579 | 9.319315354  | conserved hypothetical protein                                                                                           |
| ACD60254 | 8.044558053 | 8.799349626 | 8.819684148  | transcriptional regulator LysR family                                                                                    |
| ACD60260 | 8.646223872 | 8.618029373 | 8.844225571  | fructose-bisphosphate aldolase class-I                                                                                   |
| ACD60261 | 7.626862538 | 7.680127408 | 7.857178584  | pyruvate kinase                                                                                                          |
| ACD60262 | 7.426541524 | 7.719197133 | 6.494356404  | indigoidine synthesis like protein                                                                                       |
| ACD60263 | 7.420347653 | 7.415674173 | 7.760227601  | phosphoglycerate kinase                                                                                                  |
| ACD60264 | 6.779285989 | 6.618201942 | 5.875917643  | conserved hypothetical protein                                                                                           |
| ACD60265 | 7.454652983 | 7.400239045 | 6.542163621  | membrane protein, putative                                                                                               |
| ACD60267 | 7.284384575 | 6.679719356 | 6.362650477  | isrs05-transposase protein                                                                                               |
| ACD60271 | 6.761524639 | 5.996639569 | 6.381996237  | conserved hypothetical protein                                                                                           |
| ACD60272 | 7.67093945  | 7.457265951 | 6.755501853  | transcriptional regulator AraC/xylS family                                                                               |
| ACD60273 | 6.689620656 | 7.786027797 | 7.587934995  | conserved hypothetical protein                                                                                           |
| ACD60275 | 6.930512638 | 7.814665773 | 6.835671479  | transposase                                                                                                              |
| ACD60276 | 9.213043448 | 9.569350577 | 9.313787758  | conserved domain protein                                                                                                 |
| ACD60278 | 7.759408869 | 7.936184449 | 7.534092738  | alanyl dipeptidyl peptidase                                                                                              |
| ACD60279 | 7.128221215 | 5.985302319 | 7.537715394  | conserved hypothetical protein                                                                                           |
| ACD60281 | 6.86139713  | 6.910864551 | 6.17511337   | oligopeptide transporter, OPT family                                                                                     |
| ACD60284 | 8.215867851 | 9.010077674 | 9.020816082  | HD domain protein                                                                                                        |
| ACD60285 | 6.435370233 | 5.898950796 | 5.472653477  | error-prone DNA polymerase                                                                                               |

|          |             |             |             |                                                                                                                              |
|----------|-------------|-------------|-------------|------------------------------------------------------------------------------------------------------------------------------|
| ACD60287 | 6.257870546 | 5.772202387 | 4.779380553 | conserved hypothetical protein                                                                                               |
| ACD60288 | 5.519736884 | 5.809679394 | 5.300914427 | conserved hypothetical protein                                                                                               |
| ACD60289 | 6.961843235 | 7.14201513  | 7.054837626 | LexA repressor                                                                                                               |
| ACD60292 | 8.59840615  | 8.432470912 | 9.394722056 | conserved hypothetical protein                                                                                               |
| ACD60293 | 6.818326528 | 6.765415401 | 7.080593713 | carbohydrate kinase superfamily                                                                                              |
| ACD60294 | 7.469837148 | 7.19913246  | 6.365849982 | phosphoglycerate mutase family protein, putative                                                                             |
| ACD60296 | 8.23175879  | 9.200275795 | 8.449722307 | conserved hypothetical protein                                                                                               |
| ACD60297 | 8.343643218 | 9.029566075 | 7.043705396 | synthetase/amidase                                                                                                           |
| ACD60298 | 7.066541308 | 7.203269687 | 7.165982264 | conserved hypothetical protein                                                                                               |
| ACD60300 | 0           | 0           | 0           | conserved hypothetical protein                                                                                               |
| ACD60301 | 0           | 0           | 0           | conserved hypothetical protein                                                                                               |
| ACD60303 | 0           | 0           | 0           | HsdS polypeptide, part of CfrA family                                                                                        |
| ACD60304 | 0           | 0           | 0           | type I restriction enzyme EcoEI M protein                                                                                    |
| ACD60305 | 0           | 0           | 0           | conserved hypothetical protein                                                                                               |
| ACD60306 | 0           | 0           | 0           | conserved hypothetical protein                                                                                               |
| ACD60307 | 0           | 0           | 0           | type I restriction enzyme EcoAI R protein                                                                                    |
| ACD60308 | 0           | 0           | 2.400611702 | plasmid stabilization system                                                                                                 |
| ACD60309 | 0           | 0           | 0           | conserved hypothetical protein                                                                                               |
| AGS47854 | 8.017860681 | 0           | 0           | Putative DNA-entry nuclease precursor (N-terminal fragment), authentic frameshift                                            |
| ACD60314 | 8.827987287 | 9.485203401 | 9.843829997 | plasmid stabilization system                                                                                                 |
| ACD60315 | 6.871966824 | 7.205363186 | 7.118235121 | conserved hypothetical protein                                                                                               |
| ACD60317 | 8.964026011 | 8.68267863  | 8.719501768 | conserved hypothetical protein                                                                                               |
| ACD60318 | 7.418485137 | 6.619993963 | 6.999729469 | conserved hypothetical protein                                                                                               |
| ACD60319 | 7.697044004 | 7.665577531 | 7.503475951 | conserved hypothetical protein                                                                                               |
| ACD60320 | 6.861409537 | 6.29556692  | 7.329796338 | conserved hypothetical protein                                                                                               |
| ACD60322 | 4.77367991  | 5.093002325 | 5.457068911 | Rhs element Vgr protein                                                                                                      |
| ACD60323 | 10.32921331 | 9.943732365 | 10.11538184 | putative VGR-related protein                                                                                                 |
| ACD60324 | 9.554134101 | 9.958330857 | 9.601267521 | hypothetical protein                                                                                                         |
| ACD60325 | 7.913858789 | 7.483356298 | 7.486609803 | type VI secretion ATPase, ClpV1 family                                                                                       |
| ACD60326 | 7.484009198 | 7.088692851 | 6.507791469 | conserved hypothetical protein                                                                                               |
| ACD60327 | 7.351999272 | 7.374882986 | 6.69631382  | EvpF                                                                                                                         |
| ACD60328 | 9.561140899 | 9.577980119 | 7.180346807 | conserved hypothetical protein                                                                                               |
| ACD60329 | 13.10104661 | 12.9889793  | 10.28437301 | hypothetical protein                                                                                                         |
| ACD60390 | 7.969162005 | 7.571365851 | 6.844234988 | protease                                                                                                                     |
| ACD60391 | 7.60829179  | 7.618025701 | 7.721762266 | nuclear protein SET                                                                                                          |
| ACD60399 | 9.237045004 | 0           | 8.498378534 | conserved domain protein                                                                                                     |
| ACD60415 | 0           | 0           | 7.961304984 | hypothetical protein                                                                                                         |
| ACD60416 | 7.362136705 | 7.126776735 | 7.416265521 | tetratricopeptide repeat family                                                                                              |
| ACD60417 | 6.506971594 | 6.483106345 | 6.130253418 | Hsp90xo protein                                                                                                              |
| ACD60418 | 8.521337394 | 8.992595673 | 9.82793808  | HrpX/HrpB                                                                                                                    |
| ACD60419 | 0           | 6.555336097 | 7.869248357 | Rfc5 protein                                                                                                                 |
| ACD60421 | 8.504262852 | 9.401359543 | 8.592886792 | conserved hypothetical protein                                                                                               |
| ACD60422 | 5.040826693 | 4.237020617 | 4.598234175 | ISXoo5 transposase                                                                                                           |
| ACD60423 | 7.061765399 | 6.11047809  | 6.15163764  | xylanase                                                                                                                     |
| ACD60426 | 7.848015692 | 7.863504883 | 7.653826747 | conserved hypothetical protein                                                                                               |
| ACD60427 | 6.365302349 | 6.341784766 | 6.429729769 | ABC transporter ATP-binding protein                                                                                          |
| ACD60432 | 8.120662976 | 8.117637907 | 8.332882443 | cytochrome P-450 hydroxylase                                                                                                 |
| ACD60434 | 5.769930385 | 4.827727583 | 5.058874934 | ISXoo3 transposase ORF A                                                                                                     |
| ACD60442 | 8.549399641 | 8.596085371 | 8.52483943  | cobalamin 5'-phosphate synthase                                                                                              |
| ACD60443 | 6.330683877 | 5.963578161 | 6.627532425 | alpha-ribazole-5''-phosphate phosphatase                                                                                     |
| ACD60444 | 6.858727024 | 6.912398377 | 7.632980661 | nicotinate-nucleotide--dimethylbenzimidazole phosphoribosyltransferase (NNx3aDBI PRT) (N(1)-alpha-phosphoribosyltransferase) |
| ACD60445 | 8.700727535 | 8.182304958 | 8.785373996 | cobinamide kinase / cobinamide phosphate guanylyltransferase superfamily                                                     |
| ACD60446 | 8.144632753 | 8.053100473 | 8.080572395 | adenosyl cobinamide kinasex3b adenosyl cobinamide phosphate guanylyltransferase                                              |
| ACD60447 | 8.699919422 | 8.421038111 | 8.930891059 | cob(I)alamin adenosyltransferase                                                                                             |
| ACD60448 | 6.972508859 | 6.561072527 | 7.694267335 | conserved hypothetical protein                                                                                               |
| ACD60449 | 8.575626222 | 7.841721581 | 8.604201083 | conserved hypothetical protein                                                                                               |
| ACD60452 | 6.260462314 | 6.082634472 | 5.443500567 | TonB-dependent outer membrane Receptor                                                                                       |
| ACD60453 | 7.237391631 | 6.76655541  | 6.965530348 | ISxac3 transposase                                                                                                           |
| ACD60454 | 3.986465547 | 3.813083399 | 4.12384826  | transposase                                                                                                                  |
| ACD60458 | 7.668161683 | 7.998703246 | 7.259479648 | conserved hypothetical protein                                                                                               |
| ACD60459 | 7.697280366 | 7.902115798 | 8.441159753 | ATP-dependent chaperone ClpB                                                                                                 |
| ACD60463 | 3.858965671 | 2.913733874 | 2.887642241 | ISXo8 transposase                                                                                                            |

|          |             |             |             |                                                   |
|----------|-------------|-------------|-------------|---------------------------------------------------|
| ACD60464 | 5.546227734 | 4.30898696  | 0           | ISXo8 transposase                                 |
| ACD60465 | 7.082564222 | 7.028823281 | 7.688061435 | putative heat shock protein 15 homolog            |
| ACD60467 | 9.949320439 | 10.41324711 | 11.61541354 | ribosomal protein L19                             |
| ACD60468 | 7.777735312 | 8.115953991 | 8.252215998 | tRNA (guanine-N1)-methyltransferase               |
| ACD60469 | 8.660323984 | 9.693976485 | 9.37271926  | 16S rRNA processing protein RimM                  |
| ACD60470 | 10.50716035 | 11.71160245 | 12.01203435 | ribosomal protein S16                             |
| ACD60471 | 7.466537397 | 7.361996394 | 6.100346961 | conserved hypothetical protein                    |
| ACD60472 | 6.30983829  | 6.206861987 | 6.007392872 | 2-nitropropane dioxygenase                        |
| ACD60473 | 7.439298993 | 7.106463486 | 6.375282757 | conserved hypothetical protein                    |
| ACD60474 | 7.149045921 | 7.329437582 | 7.078332301 | signal recognition particle protein               |
| ACD60475 | 1.583384291 | 2.772402997 | 1.838040091 | ISXo5 transposase transposase                     |
| ACD60476 | 5.662649863 | 6.860280012 | 4.031906825 | transposase                                       |
| ACD60478 | 7.455746404 | 7.23308276  | 6.838535836 | aldose 1-epimerase                                |
| ACD60480 | 8.674474776 | 8.464484488 | 10.39534133 | transposase                                       |
| ACD60482 | 6.003570756 | 5.686685404 | 6.327121455 | transposase                                       |
| ACD60484 | 7.982725539 | 7.614746647 | 7.884951958 | conserved hypothetical protein                    |
| ACD60488 | 9.393845183 | 10.66031685 | 11.58935153 | DNA transport competence protein                  |
| ACD60490 | 6.26761632  | 5.727974895 | 5.850251859 | ISXoo2 transposase                                |
| ACD60494 | 7.087441625 | 7.071816289 | 5.746318142 | replication related protein                       |
| ACD60495 | 7.528039899 | 7.349825247 | 6.431273609 | permease                                          |
| ACD60496 | 6.43301117  | 7.062909607 | 6.36346197  | conserved hypothetical protein                    |
| ACD60503 | 8.009190388 | 7.713469001 | 8.464688685 | conserved hypothetical protein                    |
| ACD60504 | 6.404835017 | 6.344757496 | 6.819872517 | UDP-N-acetylglucosamine 1-carboxyvinyltransferase |
| ACD60505 | 8.545234792 | 9.296269257 | 10.92069525 | BoIA superfamily transcriptional regulator        |
| ACD60520 | 8.877808655 | 7.821314797 | 8.589969422 | hypothetical protein                              |
| ACD60523 | 8.149985856 | 8.29327851  | 8.264428525 | cytochrome D ubiquinol oxidase, subunit II        |
| ACD60524 | 6.909557116 | 6.881175155 | 8.883083126 | cytochrome D ubiquinol oxidase subunit I          |
| ACD60525 | 7.791462469 | 9.595731152 | 8.483275673 | conserved hypothetical protein                    |
| ACD60527 | 6.870512681 | 7.185658449 | 5.744938757 | amino acid transporter                            |
| ACD60528 | 6.233797966 | 6.407444531 | 5.738362528 | proline imino-peptidase                           |
| ACD60529 | 8.443055425 | 8.578833073 | 8.502656801 | transcriptional regulator AhyR/AsaR family        |
| ACD60533 | 9.954779379 | 9.684159502 | 7.959381846 | hypothetical protein                              |
| ACD60536 | 7.783882223 | 7.805098948 | 6.007774078 | tryptophan halogenase                             |
| ACD60537 | 7.117923562 | 6.54773206  | 6.432717268 | pass1 domain protein                              |
| ACD60538 | 7.380209952 | 7.399393293 | 6.775590529 | SapC superfamily                                  |
| ACD60540 | 6.912386401 | 6.495714347 | 5.821051976 | TonB-dependent receptor                           |
| ACD60541 | 10.73018989 | 11.05459075 | 9.248449447 | hypothetical protein                              |
| ACD60542 | 7.274634403 | 6.768091672 | 6.644577357 | peptidase                                         |
| ACD60543 | 7.891650058 | 7.518039363 | 6.818428793 | redox-sensitive transcriptional activator SoxR    |
| ACD60544 | 6.827260126 | 7.164283467 | 6.052485453 | synthetase/amidase                                |
| ACD60545 | 6.574030341 | 7.066369089 | 6.386581628 | lipoprotein, putative                             |
| ACD60546 | 8.481222238 | 9.013819539 | 8.475437567 | conserved hypothetical protein                    |
| ACD60547 | 7.829266074 | 7.971865394 | 7.789540166 | conserved hypothetical protein                    |
| ACD60548 | 7.207687909 | 6.74046889  | 6.613419675 | voltage-gated ion channel superfamily protein     |
| ACD60549 | 7.302940453 | 7.337193713 | 7.504056233 | PspA/IM30 family protein                          |
| ACD60550 | 8.035722872 | 8.027336545 | 8.556762766 | conserved hypothetical protein                    |
| ACD60551 | 7.089826499 | 7.466472141 | 7.386647151 | pyridoxamine 5'-phosphate oxidase                 |
| ACD60556 | 4.992070476 | 5.473640817 | 6.315673095 | transposase, IS30 family                          |
| ACD60567 | 0           | 0           | 0           | hypothetical protein                              |
| ACD60577 | 6.872213144 | 6.949418205 | 6.826891643 | TonB-dependent outer membrane Receptor            |
| ACD60581 | 7.142566604 | 7.181331185 | 6.349839398 | azurin                                            |
| ACD60582 | 8.058543793 | 7.665016072 | 7.089243894 | TdcF                                              |
| ACD60583 | 8.698367825 | 9.226756568 | 8.136150363 | cytochrome C6                                     |
| ACD60584 | 6.212398135 | 6.680507214 | 6.237318966 | TonB-dependent receptor                           |
| ACD60587 | 6.521353885 | 6.95176262  | 6.758849468 | acetylornithine aminotransferase                  |
| ACD60589 | 6.524620067 | 6.616579719 | 6.551918932 | conserved hypothetical protein                    |
| ACD60590 | 6.687102692 | 6.268541065 | 5.842795341 | conserved hypothetical protein                    |
| ACD60591 | 8.068557961 | 7.759675174 | 8.638345403 | lipoprotein, putative                             |
| ACD60593 | 7.553183842 | 7.886245286 | 7.705024081 | conserved hypothetical protein                    |
| ACD60596 | 9.07642281  | 8.382835822 | 0           | hypothetical protein                              |
| ACD60601 | 5.817116691 | 5.412581702 | 5.334217856 | ISXo5 transposase                                 |
| ACD60604 | 9.453287098 | 9.319130162 | 8.794565327 | glyceraldehyde-3-phosphate dehydrogenase, type I  |
| ACD60605 | 8.640487173 | 8.217477931 | 6.939485186 | hypothetical protein                              |
| ACD60607 | 4.090811097 | 3.660369625 | 0           | Transposase                                       |

|          |             |             |             |                                                                       |
|----------|-------------|-------------|-------------|-----------------------------------------------------------------------|
| ACD60609 | 1.929446376 | 1.539024774 | 1.12841879  | ISXo8 transposase                                                     |
| ACD60615 | 7.168862627 | 7.808681077 | 7.019746386 | lipoprotein, putative                                                 |
| ACD60616 | 8.977122478 | 8.531397057 | 7.362347146 | TonB-like protein                                                     |
| ACD60617 | 7.390994346 | 7.2345588   | 6.425853696 | peptidase, M56 family protein                                         |
| ACD60618 | 7.512218984 | 8.32652836  | 7.917998553 | transcriptional regulator Blal family                                 |
| ACD60619 | 6.661592851 | 6.81971927  | 5.384661164 | signal transduction histidine kinase                                  |
| ACD60620 | 6.824004051 | 6.84323015  | 5.601429106 | DNA-binding response regulator                                        |
| ACD60621 | 6.115545189 | 6.641363947 | 5.622441368 | TPR repeat protein                                                    |
| ACD60622 | 7.954324286 | 7.572957861 | 7.464382379 | TPR repeats containing protein                                        |
| ACD60623 | 6.60320794  | 6.668076565 | 6.361585906 | dehydrogenase with different specificities                            |
| ACD60624 | 6.816113265 | 6.321980392 | 6.299770331 | possible Transcriptional activator, TenA family                       |
| ACD60625 | 6.117281538 | 5.96929787  | 5.748106956 | long-chain acyl-CoA synthetase                                        |
| ACD60626 | 6.212156859 | 5.335000819 | 5.685802822 | putative thermostable hemolysin                                       |
| ACD60629 | 8.019685237 | 7.69516564  | 8.79262113  | hypothetical protein                                                  |
| ACD60632 | 6.783404268 | 7.157811757 | 7.284893487 | outer membrane receptor for ferric iron uptake                        |
| ACD60633 | 8.205328971 | 8.263349022 | 8.73770028  | transketolase                                                         |
| ACD60634 | 7.540593037 | 7.644130276 | 7.10912023  | proton glutamate symport protein                                      |
| ACD60635 | 7.23202752  | 7.002072385 | 6.96897776  | putative membrane protein                                             |
| ACD60636 | 7.906301375 | 7.909071023 | 8.463928925 | tetratricopeptide repeat domain protein                               |
| ACD60637 | 7.277566379 | 7.637124765 | 7.742033167 | von Willebrand factor type A domain protein                           |
| ACD60638 | 8.028287348 | 8.469251077 | 8.20030032  | conserved hypothetical protein                                        |
| ACD60639 | 7.005051848 | 7.632559052 | 7.870173581 | protein of unknown function                                           |
| ACD60640 | 9.077670274 | 9.255673034 | 10.90242034 | methanol dehydrogenase regulatory protein                             |
| ACD60643 | 8.777906231 | 9.883972039 | 8.020068768 | fimbrial assembly protein                                             |
| ACD60644 | 9.093774067 | 10.22632789 | 8.033098083 | fimbrial assembly protein                                             |
| ACD60645 | 9.417405294 | 10.1912073  | 9.206335532 | fimbrial assembly membrane protein                                    |
| ACD60646 | 10.04907255 | 10.73002002 | 9.426235397 | fimbrial assembly membrane protein                                    |
| ACD60647 | 9.286049437 | 10.31890429 | 9.099113699 | fimbrial assembly membrane protein                                    |
| ACD60650 | 8.497708159 | 8.552496194 | 9.573440803 | citrate synthase I                                                    |
| ACD60651 | 10.51884983 | 11.65080943 | 11.11326683 | ribosomal protein L31                                                 |
| ACD60652 | 6.886403822 | 7.199368071 | 6.687270693 | inosine-uridine preferring nucleoside hydrolase                       |
| ACD60653 | 7.054718264 | 7.196321797 | 6.351138892 | ATP-dependent DNA helicase RecG                                       |
| ACD60654 | 8.702151902 | 8.71829312  | 8.899900664 | endoribonuclease L-PSP, putative                                      |
| ACD60655 | 7.324558614 | 7.450675154 | 7.041790549 | guanosine-3',5'-bis(diphosphate) 3'-pyrophosphohydrolase ((ppGpp)ase) |
| ACD60656 | 11.20090473 | 11.68838146 | 11.18218327 | DNA-directed RNA polymerase omega chain                               |
| ACD60658 | 8.282203476 | 8.025211557 | 7.384352064 | guanylate kinase                                                      |
| ACD60659 | 6.700620044 | 7.045530341 | 6.262034693 | conserved hypothetical protein                                        |
| ACD60669 | 6.873665575 | 6.961982105 | 6.275876799 | aminopeptidase P                                                      |
| ACD60670 | 8.41090921  | 8.767366787 | 7.207492698 | conserved hypothetical protein                                        |
| ACD60678 | 9.511630118 | 7.913828877 | 9.47273551  | conserved domain protein                                              |
| ACD60682 | 5.241035497 | 3.976858503 | 4.818272836 | ISXoo3 transposase ORF B                                              |
| ACD60685 | 7.605990575 | 7.890519652 | 8.501009139 | NADP-dependent malic enzyme                                           |
| ACD60686 | 7.333692067 | 7.534746421 | 7.082436487 | C4-dicarboxylate transport protein                                    |
| ACD60691 | 7.214824219 | 6.881101721 | 6.765919237 | transcriptional regulator                                             |
| ACD60694 | 7.614113505 | 7.336015536 | 7.01720929  | transcriptional regulator LuxR/uhpA family                            |
| ACD60695 | 6.868625039 | 6.616362108 | 6.323984273 | periplasmic iron-binding protein                                      |
| ACD60696 | 7.002252452 | 6.840463234 | 6.238767756 | two-component system sensor protein                                   |
| ACD60697 | 8.111610403 | 7.781018673 | 7.925489165 | two-component system regulatory protein                               |
| ACD60702 | 7.378173452 | 7.718587672 | 6.096514876 | sugar transporter                                                     |
| ACD60705 | 7.662768052 | 7.281392248 | 8.114033801 | ThiJ/Pfpl family protein                                              |
| ACD60706 | 7.337684336 | 7.425408949 | 6.301704696 | conserved hypothetical protein                                        |
| ACD60707 | 7.086412262 | 6.946859499 | 6.522415185 | GTPase                                                                |
| ACD60711 | 8.382649962 | 8.418101379 | 7.574722182 | acetylxllyan esterase                                                 |
| ACD60713 | 2.09546876  | 0           | 1.856216844 | ISXo3 transposase ORF B                                               |
| ACD60714 | 2.564275725 | 1.189748667 | 1.866053381 | ISXoo13 transposase                                                   |
| ACD60719 | 9.837251049 | 10.34725594 | 10.52932318 | cellulase S                                                           |
| ACD60720 | 6.874649444 | 6.487258016 | 7.175065452 | cellulase S                                                           |
| ACD60721 | 9.001199868 | 9.571718519 | 11.26641762 | peptide deformylase                                                   |
| ACD60722 | 8.106311674 | 7.028513901 | 7.161605564 | arsenate reductase                                                    |
| ACD60723 | 10.19989315 | 9.989039637 | 8.9956428   | hypothetical protein                                                  |
| ACD60724 | 6.951377977 | 7.021390889 | 5.967650502 | membrane protein, putative                                            |
| ACD60729 | 7.370329958 | 7.678522677 | 7.24052423  | HIT domain, putative                                                  |
| ACD60730 | 7.446165231 | 6.951529515 | 6.440811043 | recombination protein RecR                                            |
| ACD60731 | 8.692859562 | 8.71751878  | 8.579636501 | conserved hypothetical protein                                        |



|          |             |             |             |                                                                                                                         |
|----------|-------------|-------------|-------------|-------------------------------------------------------------------------------------------------------------------------|
| ACD60732 | 7.413534849 | 7.645031507 | 7.222640363 | DNA polymerase III subunit gamma/tau                                                                                    |
| ACD60734 | 7.491885156 | 7.208487997 | 7.313409125 | molybdopterin converting factor, subunit 2                                                                              |
| ACD60735 | 9.058294846 | 8.226262858 | 8.889132785 | molybdopterin converting factor, subunit 1                                                                              |
| ACD60736 | 7.230241448 | 6.935730817 | 7.146186791 | molybdenum cofactor biosynthesis protein C                                                                              |
| ACD60737 | 7.455458742 | 7.260449141 | 6.819923596 | conserved hypothetical protein                                                                                          |
| ACD60738 | 7.521875213 | 7.313735617 | 6.267470254 | molybdenum cofactor biosynthesis protein A                                                                              |
| ACD60739 | 6.99688583  | 6.767906348 | 6.849699084 | molybdenum cofactor biosynthesis protein A                                                                              |
| ACD60740 | 7.356337518 | 7.598826694 | 7.360601311 | 3-deoxy-D-manno-octulosonic acid kinase                                                                                 |
| ACD60742 | 7.881071123 | 6.963982677 | 7.404545537 | conserved hypothetical protein                                                                                          |
| ACD60744 | 2.960493176 | 1.567053757 | 2.72644325  | ISXo5 transposase                                                                                                       |
| ACD60745 | 7.212306688 | 6.050379799 | 7.28049241  | conserved hypothetical protein                                                                                          |
| ACD60746 | 12.94777572 | 12.08851001 | 12.76602984 | paar motif family                                                                                                       |
| ACD60747 | 8.397606186 | 8.354892885 | 9.00098588  | conserved hypothetical protein                                                                                          |
| ACD60748 | 6.907659828 | 6.300392832 | 7.406613197 | conserved hypothetical protein                                                                                          |
| ACD60749 | 0           | 9.660541481 | 7.600693471 | hypothetical protein                                                                                                    |
| ACD60751 | 5.91634049  | 5.927377388 | 6.911284119 | conserved hypothetical protein                                                                                          |
| ACD60752 | 6.937344392 | 6.367671596 | 7.415496722 | conserved hypothetical protein                                                                                          |
| ACD60753 | 5.122105302 | 4.771341561 | 5.662433396 | Rhs element Vgr protein                                                                                                 |
| ACD60754 | 9.243992707 | 9.157432838 | 8.331557436 | hypothetical protein                                                                                                    |
| ACD60755 | 10.44753787 | 9.738637813 | 11.13887333 | site-specific DNA methylase                                                                                             |
| ACD60756 | 10.24757154 | 10.57668274 | 11.55340371 | hypothetical protein                                                                                                    |
| PXO_ma38 | 0           | 0           | 0           | XO_ma38 cDNA:pseudogene<br>chromosome:GCA_000019585.1:Chromosome:4317461:4317551:-1<br>gene:PXO_ma38 transcript:PXO_ma3 |
| ACD60758 | 7.956155416 | 8.083213368 | 7.616115051 | DNA polymerase III, epsilon subunit                                                                                     |
| ACD60759 | 7.266205598 | 8.015782997 | 7.585443319 | RNase H                                                                                                                 |
| ACD60760 | 8.397914171 | 8.891725994 | 7.923226449 | conserved hypothetical protein                                                                                          |
| ACD60764 | 7.456313341 | 7.366129842 | 6.947759653 | peptidyl-prolyl cis-trans isomerase                                                                                     |
| PXO_ma39 | 0           | 0           | 0           | XO_ma39 cDNA:pseudogene<br>chromosome:GCA_000019585.1:Chromosome:4325889:4325965:-1<br>gene:PXO_ma39 transcript:PXO_ma3 |
| PXO_ma40 | 0           | 0           | 0           | XO_ma40 cDNA:pseudogene<br>chromosome:GCA_000019585.1:Chromosome:4326060:4326136:-1<br>gene:PXO_ma40 transcript:PXO_ma4 |
| PXO_ma41 | 0           | 0           | 0           | XO_ma41 cDNA:pseudogene<br>chromosome:GCA_000019585.1:Chromosome:4326165:4326239:-1<br>gene:PXO_ma41 transcript:PXO_ma4 |
| ACD60765 | 9.809840463 | 10.35077347 | 9.868527814 | DNA-binding protein HU                                                                                                  |
| ACD60766 | 8.459034003 | 8.824764671 | 9.615853977 | ATP-dependent protease La                                                                                               |
| ACD60767 | 8.75423948  | 9.261942109 | 8.311389583 | ATP-dependent Clp protease, ATP-binding subunit ClpX                                                                    |
| ACD60768 | 9.031370382 | 9.107614645 | 8.931204364 | ATP-dependent Clp protease, proteolytic subunit ClpP                                                                    |
| ACD60769 | 8.554895775 | 8.833443574 | 8.819639447 | trigger factor                                                                                                          |
| PXO_ma42 | 0           | 0           | 0           | XO_ma42 cDNA:pseudogene<br>chromosome:GCA_000019585.1:Chromosome:4332977:4333061:-1<br>gene:PXO_ma42 transcript:PXO_ma4 |
| ACD60770 | 7.717964248 | 7.716785172 | 6.537097232 | transposase                                                                                                             |
| ACD60771 | 8.395602681 | 8.992638156 | 8.649482535 | conserved domain protein                                                                                                |
| ACD60772 | 9.264416796 | 9.379571147 | 8.625252222 | transposase                                                                                                             |
| ACD60773 | 7.703626771 | 7.890069675 | 7.501701864 | ISXoo3 transposase ORF A                                                                                                |
| PXO_ma43 | 0           | 0           | 0           | XO_ma43 cDNA:pseudogene<br>chromosome:GCA_000019585.1:Chromosome:4335467:4335542:-1<br>gene:PXO_ma43 transcript:PXO_ma4 |
| PXO_ma44 | 0           | 0           | 0           | XO_ma44 cDNA:pseudogene<br>chromosome:GCA_000019585.1:Chromosome:4335636:4335712:-1<br>gene:PXO_ma44 transcript:PXO_ma4 |
| PXO_ma45 | 0           | 0           | 0           | XO_ma45 cDNA:pseudogene<br>chromosome:GCA_000019585.1:Chromosome:4335745:4335821:-1<br>gene:PXO_ma45 transcript:PXO_ma4 |
| PXO_ma46 | 0           | 0           | 0           | XO_ma46 cDNA:pseudogene<br>chromosome:GCA_000019585.1:Chromosome:4335864:4335940:-1<br>gene:PXO_ma46 transcript:PXO_ma4 |
| ACD60775 | 8.677250998 | 9.03552769  | 9.555125925 | isocitrate dehydrogenase [NAD] subunit alpha, (isocitric dehydrogenase) (nad(+)-specific icdh)                          |
| ACD60777 | 2.839623054 | 2.512702227 | 0           | transposase (IS4 family)                                                                                                |
| ACD60778 | 8.406523915 | 8.258043036 | 8.555888993 | carboxymuconolactone decarboxylase                                                                                      |
| ACD60779 | 8.139929882 | 8.048911855 | 10.17284001 | glutaredoxin 3                                                                                                          |
| ACD60783 | 11.49029434 | 12.75039924 | 11.30035256 | hypothetical protein                                                                                                    |
| ACD60791 | 7.173157423 | 6.167215402 | 6.155623768 | conserved hypothetical protein                                                                                          |
| ACD60792 | 11.06666777 | 8.747420969 | 11.96637206 | hypothetical protein                                                                                                    |
| ACD60793 | 7.807921584 | 7.409127832 | 7.601570245 | conserved hypothetical protein                                                                                          |

|          |             |             |             |                                                                               |
|----------|-------------|-------------|-------------|-------------------------------------------------------------------------------|
| ACD60794 | 7.857514531 | 7.899296495 | 9.07281593  | amidophosphoribosyltransferase                                                |
| ACD60795 | 8.010276329 | 7.906926663 | 8.54340695  | colicin V production protein                                                  |
| ACD60796 | 6.329701276 | 6.730368236 | 7.986314221 | conserved hypothetical protein                                                |
| ACD60797 | 6.795000624 | 6.312859364 | 6.2351622   | folylpolyglutamate synthase\x3b dihydrofolate synthase                        |
| ACD60798 | 0           | 0           | 7.239025633 | hypothetical protein                                                          |
| ACD60800 | 7.347479639 | 7.961166047 | 7.068703052 | phosphoglycerate mutase                                                       |
| ACD60801 | 6.95541743  | 7.022212438 | 5.865186397 | conserved hypothetical protein                                                |
| ACD60802 | 6.850124314 | 5.813442599 | 5.897765607 | Non-hemolytic phospholipase C                                                 |
| ACD60805 | 10.37883671 | 10.53929454 | 11.12362999 | conserved hypothetical protein                                                |
| ACD60806 | 7.261690646 | 7.429490434 | 6.725427612 | sulfate/thiosulfate import ATP-binding protein CysA                           |
| ACD60807 | 7.95419631  | 8.09318513  | 6.935389026 | sulfate ABC transporter, permease protein CysW                                |
| ACD60808 | 7.406885261 | 7.769441172 | 6.976993646 | sulfate ABC transporter, permease protein CysT                                |
| ACD60809 | 7.714973551 | 7.717964248 | 7.8622158   | ABC transporter sulfate binding protein                                       |
| ACD60812 | 6.473816129 | 6.666600386 | 6.065929839 | pseudouridylate synthase                                                      |
| ACD60813 | 6.68385082  | 6.155739115 | 6.512451302 | conserved hypothetical protein                                                |
| ACD60814 | 10.26801559 | 11.0004719  | 13.35770319 | OmpA family outer membrane protein                                            |
| ACD60825 | 10.8051312  | 10.3527828  | 10.7076611  | hypothetical protein                                                          |
| ACD60829 | 0           | 0           | 0           | putative transposase                                                          |
| ACD60831 | 8.683026175 | 8.531619291 | 9.721341897 | malate dehydrogenase                                                          |
| ACD60832 | 9.024339074 | 9.535469797 | 10.36946648 | peptidyl-prolyl cis-trans isomerase                                           |
| ACD60836 | 7.020679983 | 7.29200867  | 6.462974982 | membrane protein                                                              |
| ACD60837 | 7.100494146 | 7.478947544 | 7.05883598  | 3-deoxy-7-phosphoheptulonate synthase                                         |
| ACD60839 | 7.860956592 | 7.892639954 | 6.992757103 | disulfide bond formation protein B                                            |
| ACD60846 | 8.98251735  | 9.006331689 | 9.06301211  | conserved hypothetical protein                                                |
| ACD60847 | 9.797192979 | 9.703808429 | 9.777450949 | transposase                                                                   |
| ACD60848 | 3.181407918 | 2.856597335 | 4.706149246 | transposase                                                                   |
| ACD60849 | 6.865238371 | 5.232449709 | 5.47518867  | transposase                                                                   |
| ACD60851 | 0           | 0           | 0           | transposase                                                                   |
| ACD60853 | 8.088608056 | 7.878590481 | 7.942356152 | transposase                                                                   |
| ACD60854 | 4.04199638  | 4.119613482 | 3.045214037 | ISXo8 transposase                                                             |
| ACD60855 | 9.540536857 | 9.881081832 | 11.96457552 | transposase                                                                   |
| ACD60856 | 8.363004576 | 8.3459862   | 8.065739241 | ISXoo3 transposase ORF A                                                      |
| ACD60858 | 7.62902141  | 7.405158486 | 7.499128346 | pseudouridylate synthase                                                      |
| ACD60859 | 0           | 8.579100932 | 9.93801079  | pseudouridylate synthase                                                      |
| ACD60864 | 0           | 0           | 0           | ISXoo11 transposase                                                           |
| ACD60867 | 0.66829162  | 2.220147285 | 1.522226532 | ISXo8 transposase                                                             |
| ACD60870 | 8.712035128 | 9.353773181 | 8.202985754 | conserved hypothetical protein                                                |
| ACD60871 | 6.880281455 | 6.712582025 | 5.832705236 | ATP-dependent protease La (LON) domain subfamily                              |
| ACD60872 | 7.631511766 | 8.086783766 | 7.338468986 | UDP-N-acetylmuramate\x3aL-alanyl-gamma-D-glutamyl-meso-diaminopimelate ligase |
| ACD60873 | 8.311398666 | 8.828015858 | 8.403391294 | adenylate kinase                                                              |
| ACD60877 | 7.687004682 | 7.680985347 | 8.232339376 | conserved hypothetical protein                                                |
| ACD60878 | 3.962872876 | 3.150939796 | 3.023384887 | ISXo5 transposase                                                             |
| ACD60879 | 7.089243894 | 7.143036211 | 6.5358881   | conserved hypothetical protein                                                |
| ACD60882 | 6.924088006 | 6.652041858 | 9.386216022 | TonB-dependent receptor                                                       |
| ACD60883 | 5.982053521 | 6.164277433 | 7.370730992 | transcriptional regulator                                                     |
| ACD60884 | 6.746863616 | 6.999143145 | 7.585428296 | transcriptional regulatory protein, C terminal                                |
| ACD60885 | 7.088226419 | 6.946496941 | 6.989218499 | thiamine biosynthesis protein ThiC                                            |
| ACD60886 | 10.62315905 | 9.42980633  | 0           | hypothetical protein                                                          |
| ACD60893 | 7.636530371 | 7.497189202 | 6.901168595 | 3-isopropylmalate dehydrogenase                                               |
| ACD60894 | 8.065410749 | 8.453373533 | 7.78359416  | methyltransferase in menaquinone/biotin biosynthesis                          |
| ACD60895 | 8.138696737 | 8.369025826 | 8.477972733 | 3-isopropylmalate dehydratase, small subunit                                  |
| ACD60896 | 8.755929073 | 9.021807273 | 9.766696192 | 3-isopropylmalate dehydratase, large subunit                                  |
| ACD60898 | 7.68044392  | 7.132000966 | 7.540407055 | Putative signal protein with GGDEF domain                                     |
| ACD60900 | 0           | 0           | 11.82976237 | conserved hypothetical protein                                                |
| ACD60901 | 0           | 0           | 0           | conserved hypothetical protein                                                |
| ACD60905 | 7.456321556 | 7.245001192 | 6.24071693  | 3-deoxy-D-manno-octulosonic-acid transferase                                  |
| ACD60907 | 7.478340892 | 7.451244087 | 6.759701802 | membrane protein                                                              |
| ACD60908 | 7.275779979 | 7.090228889 | 6.870389381 | glycosyltransferase                                                           |
| ACD60909 | 10.06369168 | 10.49271445 | 10.51606441 | conserved hypothetical protein                                                |
| ACD60910 | 7.080401844 | 7.779226884 | 7.301660804 | conserved hypothetical protein                                                |
| ACD60911 | 8.051861473 | 7.932403752 | 7.567256417 | conserved hypothetical protein                                                |
| ACD60914 | 6.851424242 | 6.402012659 | 6.881187394 | aminopeptidase N                                                              |
| ACD60915 | 7.481266646 | 7.760021298 | 9.011431343 | adenylosuccinate synthetase                                                   |

|           |             |             |             |                                                                                                                            |
|-----------|-------------|-------------|-------------|----------------------------------------------------------------------------------------------------------------------------|
| ACD60916  | 9.886856468 | 9.497225136 | 9.571191381 | conserved hypothetical protein                                                                                             |
| ACD60917  | 8.535551445 | 7.943599051 | 8.485455005 | HflC protein                                                                                                               |
| ACD60918  | 7.754553506 | 7.819968288 | 7.539864473 | integral membrane protease subunit                                                                                         |
| ACD60919  | 8.675466645 | 9.163254673 | 9.609332051 | regulatory protein PilH family                                                                                             |
| ACD60920  | 7.520445822 | 7.87374554  | 9.100478377 | curved DNA binding protein                                                                                                 |
| ACD60921  | 8.521977258 | 9.014302285 | 10.35623186 | low molecular weight heat shock protein                                                                                    |
| ACD60925  | 0           | 2.759477581 | 1.70577005  | ISXo3 transposase ORF A                                                                                                    |
| ACD60926  | 0           | 2.1842549   | 0           | ISXo8 transposase                                                                                                          |
| ACD60928  | 7.28872768  | 0           | 5.412869574 | ISXo8 transposase                                                                                                          |
| ACD60929  | 6.023601345 | 5.692800992 | 5.222387269 | conserved hypothetical protein                                                                                             |
| ACD60930  | 6.876074862 | 7.034105642 | 8.465007176 | glycerophosphodiester phosphodiesterase                                                                                    |
| ACD60931  | 6.831801255 | 6.480342684 | 10.25286645 | TonB-dependent outer membrane receptor                                                                                     |
| ACD60932  | 9.046463776 | 9.02142698  | 8.297150138 | hypothetical protein                                                                                                       |
| ACD60933  | 6.517337117 | 6.112426996 | 5.019128102 | conserved hypothetical protein                                                                                             |
| ACD60934  | 8.821276525 | 7.809768129 | 8.064106815 | hypothetical protein                                                                                                       |
| ACD60936  | 6.974345752 | 6.493077265 | 6.218992288 | inosine-uridine preferring nucleoside hydrolase                                                                            |
| ACD60937  | 6.136644619 | 5.802684374 | 5.97647133  | TonB-dependent outer membrane receptor                                                                                     |
| ACD60940  | 5.749089055 | 6.265474403 | 5.658091491 | probable AcnD-accessory protein PrpF                                                                                       |
| ACD60942  | 11.17220871 | 10.5430705  | 9.597013386 | conserved hypothetical protein                                                                                             |
| ACD60944  | 7.751149021 | 8.687025685 | 6.621076023 | conserved hypothetical protein                                                                                             |
| ACD60945  | 6.783823306 | 6.817789516 | 6.062663571 | 2-methylisocitrate dehydratase, Fe/S-dependent                                                                             |
| ACD60946  | 0           | 0           | 0           | aconitate hydratase 1                                                                                                      |
| ACD60947  | 7.653088687 | 7.868168179 | 7.603559586 | 2-methylcitrate synthase                                                                                                   |
| ACD60948  | 7.252741113 | 7.489896116 | 5.953435204 | methylisocitrate lyase                                                                                                     |
| ACD60950  | 9.416843963 | 8.491612627 | 9.649696285 | lipoprotein, putative                                                                                                      |
| PXO_rna47 | 0           | 0           | 0           | XO_rna47 cDNA:pseudogene<br>chromosome:GCA_000019585.1:Chromosome:4520331:4520405:-1<br>gene:PXO_rna47 transcript:PXO_rna4 |
| ACD60951  | 7.608543147 | 7.478826234 | 7.677923965 | type IV fimbriae assembly protein                                                                                          |
| ACD60952  | 6.690431064 | 6.997642424 | 6.471758116 | DNA polymerase III delta' subunit                                                                                          |
| ACD60953  | 6.639802297 | 6.822972276 | 6.088616536 | conserved hypothetical protein                                                                                             |
| ACD60954  | 6.43107633  | 6.253384236 | 6.136964462 | para-aminobenzoate synthase component I                                                                                    |
| ACD60955  | 7.212335874 | 7.36927453  | 7.53039073  | 3-oxoacyl-[acyl-carrier-protein] synthase II                                                                               |
| ACD60956  | 11.78649018 | 12.14201768 | 13.32353333 | acyl carrier protein                                                                                                       |
| ACD60957  | 7.316453513 | 7.535135378 | 8.033802898 | 3-oxoacyl-(acyl-carrier-protein) reductase                                                                                 |
| ACD60958  | 6.46746861  | 6.702297379 | 6.656467768 | malonyl CoA-acyl carrier protein transacylase                                                                              |
| ACD60959  | 7.239999421 | 7.499255935 | 6.999470163 | conserved hypothetical protein                                                                                             |
| ACD60960  | 7.649536425 | 8.283870855 | 8.24008054  | 3-oxoacyl-[acyl-carrier-protein] synthase III                                                                              |
| ACD60961  | 11.16960562 | 11.26492928 | 12.47758627 | ribosomal protein L32                                                                                                      |
| ACD60962  | 8.254149935 | 8.299157638 | 8.010321093 | conserved hypothetical protein                                                                                             |
| ACD60964  | 6.461687344 | 5.653770868 | 6.354406317 | ISXo5 transposase                                                                                                          |
| ACD60972  | 8.303438296 | 7.32998465  | 8.64292896  | transposase                                                                                                                |
| ACD60973  | 7.808565248 | 7.361715731 | 8.132335208 | transposase                                                                                                                |
| ACD60974  | 7.220039684 | 6.779653702 | 6.318063715 | glycosyl transferase                                                                                                       |
| ACD60979  | 7.95095242  | 7.909017003 | 6.092957942 | conserved hypothetical protein                                                                                             |
| ACD60980  | 7.707165839 | 7.641293131 | 7.597724832 | general secretion pathway protein D                                                                                        |
| ACD60981  | 7.009559924 | 7.382502986 | 6.752588045 | general secretion pathway protein N                                                                                        |
| ACD60982  | 6.53233878  | 6.793362705 | 6.535088709 | general secretion pathway protein M                                                                                        |
| ACD60983  | 7.230808237 | 7.867816175 | 6.503372589 | general secretion pathway protein L                                                                                        |
| ACD60984  | 6.161073418 | 6.78501428  | 6.258786484 | general secretion pathway protein K                                                                                        |
| ACD60985  | 7.400102391 | 7.168742308 | 6.745923014 | general secretion pathway protein J                                                                                        |
| ACD60986  | 8.316050682 | 7.803246413 | 7.426575069 | general secretion pathway protein I                                                                                        |
| ACD60987  | 5.844483577 | 7.312538119 | 6.836403883 | general secretion pathway protein H                                                                                        |
| ACD60988  | 7.420591877 | 7.111114799 | 7.391776311 | general secretion pathway protein G                                                                                        |
| ACD60989  | 7.38921401  | 7.821984393 | 6.623757146 | general secretion pathway protein F                                                                                        |
| ACD60991  | 7.52277767  | 7.25306271  | 7.398333267 | general secretory pathway protein E                                                                                        |
| ACD60992  | 8.220397676 | 8.645521541 | 8.775932855 | protease                                                                                                                   |
| ACD60993  | 8.619123181 | 8.530261963 | 8.728036138 | extracellular protease                                                                                                     |
| AGS47856  | 8.219613848 | 8.527602112 | 7.420162352 | truncated serine protease                                                                                                  |
| ACD60995  | 8.220697548 | 8.558807166 | 6.950351762 | Xanthomonas adhesin-like protein A                                                                                         |
| ACD60996  | 6.948904492 | 7.013484592 | 6.483606209 | phosphoribosylformylglycinamide synthase                                                                                   |
| ACD60998  | 6.775076887 | 7.239846713 | 6.193521418 | disulfide isomerase                                                                                                        |
| ACD60999  | 9.327963501 | 10.12092471 | 9.090938093 | hypothetical protein                                                                                                       |
| ACD61000  | 6.498477468 | 6.852123719 | 6.019492878 | tyrosine recombinase XerD                                                                                                  |

|          |             |             |             |                                                                        |
|----------|-------------|-------------|-------------|------------------------------------------------------------------------|
| ACD61002 | 9.756614696 | 9.685488185 | 9.965145029 | conserved hypothetical protein                                         |
| ACD61003 | 6.747937839 | 7.127509473 | 6.285910772 | putative permease, YjgP/YjgQ family                                    |
| ACD61004 | 6.767125077 | 6.548499818 | 6.625418083 | putative permease, YjgP/YjgQ family                                    |
| ACD61014 | 3.939339431 | 3.702535652 | 2.287126503 | ISXo1 transposase                                                      |
| ACD61017 | 6.893811163 | 6.919077837 | 6.931801228 | soluble lytic murein transglycosylase                                  |
| ACD61020 | 0.625364016 | 0           | 0           | ISXo8 transposase                                                      |
| ACD61022 | 0           | 0           | 0           | ISXo8 transposase                                                      |
| ACD61023 | 7.932462809 | 7.345289915 | 6.490799544 | ribosomal-protein-alanine acetyltransferase                            |
| ACD61024 | 7.479190134 | 7.413924053 | 6.693068724 | conserved hypothetical protein                                         |
| ACD61025 | 7.339030462 | 7.346983474 | 6.728029333 | phosphatidylserine synthase                                            |
| ACD61029 | 7.388172313 | 7.563249669 | 6.65047737  | membrane protein, putative                                             |
| ACD61035 | 6.357757838 | 6.635394543 | 6.188112072 | DNA repair system specific for alkylated DNA                           |
| ACD61038 | 7.288183198 | 7.283773644 | 6.275118822 | succinyl-CoA:3-oxoacid-coenzyme A transferase subunit B                |
| ACD61039 | 6.172255475 | 6.804569895 | 6.042022654 | succinyl-CoA:3-oxoacid-coenzyme A transferase subunit A                |
| ACD61042 | 6.728042942 | 6.853035027 | 6.170423847 | dTDP-4-dehydrorhamnose reductase                                       |
| ACD61043 | 7.371689536 | 7.527258044 | 7.419741124 | dTDP-4-dehydrorhamnose 3,5-epimerase                                   |
| ACD61044 | 7.56192179  | 7.76773424  | 7.28213396  | glucose-1-phosphate thymidyltransferase                                |
| ACD61045 | 7.650843526 | 7.435961895 | 7.323424115 | dTDP-glucose 4,6-dehydratase                                           |
| ACD61050 | 7.33655119  | 7.539127785 | 6.840765337 | transposase                                                            |
| ACD61052 | 10.70689311 | 9.523683482 | 9.997828689 | conserved domain protein                                               |
| ACD61053 | 0           | 0           | 0           | ISXo8 transposase                                                      |
| ACD61054 | 7.848779406 | 8.159260837 | 8.118167622 | putative O-antigen acetylase                                           |
| ACD61055 | 8.850436904 | 8.711253978 | 8.588594718 | putative glycosyl transferase                                          |
| ACD61056 | 10.43187364 | 10.11612299 | 9.54706225  | hypothetical protein                                                   |
| ACD61057 | 8.615129342 | 8.575943825 | 8.13187239  | putative glycosyltransferase                                           |
| ACD61058 | 8.635402525 | 8.442425193 | 7.922477367 | sugar nucleotide epimerase/dehydratase                                 |
| ACD61060 | 8.709304423 | 8.862355299 | 8.393742239 | putative methyltransferase                                             |
| ACD61061 | 9.094774446 | 9.477337335 | 9.865440991 | cystathionine gamma-synthase (CGS) (O-succinylhomoserine(Thiol)-lyase) |
| ACD61062 | 10.47766721 | 10.24727483 | 10.05173915 | hypothetical protein                                                   |
| ACD61063 | 8.518409244 | 8.768667348 | 8.22527493  | cystathionine beta-synthase                                            |
| ACD61065 | 14.95884721 | 15.05912473 | 15.43318116 | UptF                                                                   |
| ACD61066 | 7.026700483 | 7.69642511  | 7.978395863 | outer membrane protein                                                 |
| ACD61067 | 8.062191884 | 8.584864815 | 10.03624231 | outer membran protein                                                  |
| ACD61069 | 7.214260829 | 7.030987087 | 6.759368919 | maleylacetoacetate isomerase                                           |
| ACD61070 | 7.402022895 | 6.962155675 | 6.916727422 | fumarylacetoacetate hydrolase                                          |
| ACD61072 | 8.43934471  | 6.091665988 | 8.816065252 | spo0B-associated GTP-binding protein                                   |
| ACD61075 | 6.823774831 | 6.916655776 | 7.301569357 | dethiobiotin synthase                                                  |
| ACD61078 | 7.912440295 | 7.030413332 | 7.742188154 | phosphoglycolate phosphatase, bacterial                                |
| ACD61079 | 6.754326345 | 6.66715413  | 6.568900076 | ImpB/MucB/SamB family                                                  |
| ACD61082 | 6.372605656 | 6.331929098 | 7.877462063 | conserved hypothetical protein                                         |
| ACD61083 | 7.421383216 | 7.332842173 | 7.883297004 | oligopeptidase A                                                       |
| ACD61084 | 6.923184843 | 6.854033061 | 7.2773525   | cysteine synthase                                                      |
| ACD61090 | 7.512527153 | 7.045421127 | 8.15390158  | ISXoo11 transposase                                                    |
| ACD61092 | 9.340557818 | 11.03052231 | 9.438791853 | conserved hypothetical protein                                         |
| ACD61093 | 7.99760291  | 7.883034236 | 8.538774817 | conserved hypothetical protein                                         |
| ACD61094 | 7.055651198 | 7.031097398 | 7.044601765 | glucosamine--fructose-6-phosphate aminotransferase, isomerizing        |
| ACD61097 | 3.304277388 | 0.648493054 | 3.294566348 | transposase                                                            |
| ACD61099 | 4.431549419 | 7.288902977 | 5.677477234 | ISXoo12 transposase                                                    |
| ACD61101 | 7.755081184 | 8.054767095 | 8.155567104 | transposase                                                            |
| ACD61103 | 7.704726747 | 7.54335668  | 7.727552929 | UDP-N-acetylglucosamine pyrophosphorylase                              |
| ACD61105 | 6.889899376 | 7.971807928 | 7.408839212 | chorismate mutase:3b prephenate dehydratase                            |
| ACD61106 | 9.360667147 | 10.18115226 | 9.369968059 | hypothetical protein                                                   |
| ACD61107 | 7.431280296 | 8.351835892 | 6.137601886 | ATP synthase F1, epsilon subunit                                       |
| ACD61108 | 8.031726011 | 8.015989228 | 7.825677523 | ATP synthase F1, beta subunit                                          |
| ACD61109 | 7.71363396  | 8.151432665 | 7.256576688 | ATP synthase F1, gamma subunit                                         |
| ACD61110 | 7.882104995 | 8.05800255  | 8.177509236 | ATP synthase F1, alpha subunit                                         |
| ACD61111 | 7.29614534  | 7.587800014 | 7.421458959 | ATP synthase F1, delta subunit                                         |
| ACD61112 | 8.204028198 | 8.8832359   | 8.749041441 | ATP synthase F0, B subunit                                             |
| ACD61113 | 12.04856861 | 11.8652345  | 12.65757972 | ATP synthase C chain                                                   |
| ACD61114 | 9.312966883 | 9.311148865 | 8.989045315 | ATP synthase F0, A subunit                                             |
| ACD61115 | 10.50433238 | 10.40654517 | 10.63190459 | conserved hypothetical protein                                         |
| ACD61117 | 7.541816815 | 7.696598984 | 6.81258807  | conserved hypothetical protein                                         |
| ACD61118 | 7.486231678 | 7.741804025 | 7.1248554   | dihydrolipoamide dehydrogenase                                         |
| ACD61119 | 6.675717152 | 7.41493042  | 6.468415514 | conserved hypothetical protein                                         |

|          |             |             |             |                                                                             |
|----------|-------------|-------------|-------------|-----------------------------------------------------------------------------|
| ACD61120 | 7.208429469 | 7.394265463 | 7.995919749 | pyruvate dehydrogenase complex dihydrolipoamide acetyltransferase           |
| ACD61121 | 6.697579238 | 6.099065819 | 5.794223494 | putative secreted protein                                                   |
| ACD61122 | 7.706758459 | 7.049434736 | 6.833307576 | T/U mismatch-specific DNA glycosylase                                       |
| ACD61124 | 8.232914933 | 7.833307576 | 8.243987948 | conserved hypothetical protein                                              |
| ACD61125 | 8.249345783 | 8.060090629 | 8.570937224 | outer membrane protein                                                      |
| ACD61126 | 6.396846209 | 6.484499082 | 6.216668266 | ABC transporter permease                                                    |
| ACD61127 | 6.802787754 | 6.435621927 | 6.390024464 | ABC transporter ATP-binding protein                                         |
| ACD61128 | 7.120870295 | 6.785968967 | 7.050664938 | integral membrane protein DUF6                                              |
| ACD61134 | 7.571934628 | 6.960523294 | 6.501542646 | HAD superfamily hydrolase                                                   |
| ACD61135 | 6.785380536 | 6.768872419 | 6.525732206 | ribosomal small subunit pseudouridylate synthase                            |
| ACD61136 | 7.285198748 | 6.870327727 | 6.360969955 | ribosomal RNA small subunit methyltransferase C                             |
| ACD61138 | 9.309060197 | 9.219763872 | 8.808253107 | L-sorbose dehydrogenase                                                     |
| ACD61139 | 9.049867604 | 8.618429553 | 8.49820698  | conserved hypothetical protein                                              |
| ACD61140 | 7.671901916 | 8.336301243 | 8.318714522 | sensor histidine kinase                                                     |
| ACD61141 | 9.154866198 | 9.809502873 | 9.186681299 | conserved hypothetical protein                                              |
| ACD61142 | 9.214765947 | 9.796234335 | 10.7927659  | conserved hypothetical protein                                              |
| ACD61144 | 7.079602115 | 7.408346726 | 7.985813481 | alanine racemase                                                            |
| ACD61145 | 7.989632919 | 7.637479834 | 9.06176     | D-amino acid dehydrogenase small subunit                                    |
| ACD61147 | 7.958401913 | 8.103293055 | 10.14411012 | conserved hypothetical protein                                              |
| ACD61155 | 7.159861248 | 6.653747943 | 6.047119549 | histidine kinase/response regulator hybrid protein                          |
| ACD61156 | 8.14550424  | 8.136401614 | 8.436049374 | hypothetical protein                                                        |
| ACD61159 | 7.738821869 | 7.323865415 | 7.657261277 | conserved hypothetical protein                                              |
| ACD61161 | 11.96899072 | 10.97467987 | 10.57154409 | hypothetical protein                                                        |
| ACD61162 | 7.742033167 | 6.63611415  | 6.663899614 | ABC-2 type transporter                                                      |
| ACD61163 | 7.205089443 | 7.141228406 | 6.350118844 | ABC transporter ATP-binding protein                                         |
| ACD61164 | 7.307073272 | 7.183625457 | 6.273810516 | Na <sup>+</sup> /H <sup>+</sup> antiporter                                  |
| ACD61165 | 8.814220345 | 8.675681872 | 7.538724386 | hypothetical protein                                                        |
| ACD61166 | 7.648134644 | 7.336015536 | 6.771251752 | hypothetical protein                                                        |
| ACD61169 | 7.08061503  | 6.860230342 | 6.485061277 | uracil DNA glycosylase superfamily protein                                  |
| ACD61170 | 7.434945085 | 7.468852087 | 7.569680956 | elongator protein 3/MiaB/NifB                                               |
| ACD61171 | 7.774681653 | 7.033555151 | 6.996117538 | 4,5-dopa dioxygenase extradiol                                              |
| ACD61172 | 8.891340196 | 8.967355966 | 8.447289901 | DoxX subfamily                                                              |
| ACD61174 | 10.00102812 | 10.70234587 | 9.408482601 | hypothetical protein                                                        |
| ACD61176 | 8.191607063 | 6.721919446 | 7.146023823 | hypothetical protein                                                        |
| ACD61179 | 6.778852493 | 6.771700741 | 6.346425086 | conserved hypothetical protein                                              |
| ACD61181 | 7.305943169 | 7.475368659 | 6.565406774 | amino acid transporter                                                      |
| ACD61182 | 8.125966161 | 7.908446665 | 7.56285296  | lipoprotein, putative                                                       |
| ACD61183 | 7.543843833 | 7.326887841 | 8.282453706 | transcriptional regulator protein                                           |
| ACD61184 | 6.669310286 | 6.046191996 | 6.859199309 | transcriptional regulator protein                                           |
| ACD61185 | 7.846461974 | 7.445569463 | 8.068106476 | histidine kinase family                                                     |
| ACD61186 | 7.827857123 | 8.24306923  | 7.310412835 | conserved hypothetical protein                                              |
| ACD61188 | 10.07875125 | 9.23556672  | 10.79899824 | conserved hypothetical protein                                              |
| ACD61190 | 4.438778548 | 0           | 1.937020409 | transposase                                                                 |
| ACD61192 | 0           | 0           | 0           | methyltransferase                                                           |
| ACD61193 | 8.02504541  | 7.635232002 | 7.569787269 | methyltransferase                                                           |
| ACD61195 | 9.301690523 | 9.130910283 | 7.312647024 | conserved hypothetical protein                                              |
| ACD61196 | 8.071049339 | 8.551416041 | 6.71189407  | transcriptional regulator NtrC family                                       |
| ACD61205 | 9.879875741 | 9.241368295 | 8.722213257 | hypothetical protein                                                        |
| ACD61212 | 6.750472519 | 6.869748051 | 6.752935873 | conserved hypothetical protein                                              |
| ACD61213 | 7.064710435 | 7.55007722  | 5.921681488 | conserved hypothetical protein                                              |
| ACD61214 | 6.412690084 | 7.099253118 | 6.141479795 | conserved hypothetical protein                                              |
| ACD61216 | 7.187728164 | 6.782198856 | 6.97157804  | conserved hypothetical protein                                              |
| ACD61220 | 11.74940437 | 10.33798978 | 11.0283136  | hypothetical protein                                                        |
| ACD61223 | 0           | 0           | 0           | Rhs family protein                                                          |
| ACD61225 | 0           | 0           | 0           | filamentous haemagglutinin, N-terminal/x3aAdhesin HecA 20-residue repeat x2 |
| ACD61226 | 0           | 0           | 0           | ISxac3 transposase                                                          |
| ACD61235 | 0           | 0           | 0           | integrase core domain protein                                               |
| ACD61238 | 0           | 0           | 0           | ISXoo9 transposase orfB                                                     |
| ACD61240 | 0           | 0           | 0           | filamentous haemagglutinin                                                  |
| ACD61242 | 0           | 0           | 0           | filamentous haemagglutinin                                                  |
| ACD61244 | 0           | 0           | 0           | filamentous haemagglutinin/x3b haemagglutination activity domain protein    |
| ACD61245 | 0           | 0           | 0           | outer membrane hemolysin activator protein                                  |
| ACD61246 | 0           | 0           | 0           | ice nucleation protein                                                      |
| ACD61248 | 7.752668321 | 7.761644307 | 7.13017927  | dual specificity phosphatase, catalytic domain protein                      |

|           |             |             |              |                                                                                                                            |
|-----------|-------------|-------------|--------------|----------------------------------------------------------------------------------------------------------------------------|
| ACD61249  | 4.79006824  | 5.10912232  | 3.470601938  | alpha/beta hydrolase fold                                                                                                  |
| ACD61250  | 7.098611151 | 7.303598117 | 7.631853672  | alpha/beta hydrolase                                                                                                       |
| ACD61251  | 7.502927251 | 8.06452722  | 8.268429715  | CDP-alcohol phosphatidyltransferase                                                                                        |
| ACD61256  | 0           | 7.879969142 | 8.776933036  | hypothetical protein                                                                                                       |
| ACD61260  | 8.158382474 | 8.098211092 | 7.01180869   | transmembrane protein                                                                                                      |
| ACD61261  | 7.127468202 | 7.326977697 | 6.436661578  | NADH pyrophosphatase                                                                                                       |
| ACD61262  | 9.817432996 | 9.75580893  | 10.70210341  | conserved hypothetical protein                                                                                             |
| ACD61265  | 9.291341095 | 9.221676532 | 9.124581453  | HesB/YadR/YfhF                                                                                                             |
| ACD61266  | 8.639619271 | 8.410955836 | 9.120849564  | conserved hypothetical protein                                                                                             |
| ACD61267  | 7.843324384 | 7.712664557 | 7.657854336  | conserved hypothetical protein                                                                                             |
| ACD61268  | 6.896174955 | 6.829494422 | 6.440154909  | conserved hypothetical protein                                                                                             |
| PXO_rna50 | 0           | 0           | 0            | XO_rna50 cDNA:pseudogene<br>chromosome:GCA_000019585.1:Chromosome:4861134:4861210:-1<br>gene:PXO_rna50 transcript:PXO_rna5 |
| PXO_rna51 | 0           | 0           | 0            | XO_rna51 cDNA:pseudogene<br>chromosome:GCA_000019585.1:Chromosome:4861230:4861305:-1<br>gene:PXO_rna51 transcript:PXO_rna5 |
| ACD61274  | 8.197103633 | 8.344540036 | 7.821097909  | tyrosyl-tRNA synthetase                                                                                                    |
| ACD61278  | 10.07542567 | 10.31841853 | 10.0344551   | conserved hypothetical protein                                                                                             |
| ACD61279  | 7.413357134 | 7.623698627 | 6.649514869  | signal transducer                                                                                                          |
| ACD61281  | 7.114544019 | 7.541259272 | 8.395932508  | exodeoxyribonuclease III                                                                                                   |
| ACD61291  | 10.73183661 | 10.77152248 | 10.07470344  | conserved hypothetical protein                                                                                             |
| ACD61293  | 7.89372017  | 8.214668823 | 8.115215358  | phosphomannomutase                                                                                                         |
| ACD61294  | 8.333168771 | 7.57562244  | 7.449998739  | deoxyuridine 5'-triphosphate nucleotidohydrolase                                                                           |
| ACD61295  | 6.794415866 | 6.665094263 | 7.078129454  | phosphopantothenoylecysteine decarboxylase/phosphopantothenate--cysteine<br>ligase                                         |
| ACD61301  | 7.39096856  | 7.423485731 | 7.218839277  | transposase                                                                                                                |
| ACD61302  | 8.49077468  | 8.628540319 | 9.616859403  | RIO1/family protein                                                                                                        |
| ACD61305  | 6.320383585 | 6.424645008 | 5.555104446  | hydrolase                                                                                                                  |
| ACD61306  | 8.871621906 | 8.659275257 | 8.901005638  | 4-carboxymuconolactone decarboxylase                                                                                       |
| ACD61307  | 7.380971816 | 8.054219005 | 7.329311996  | 3-oxoadipate enol-lactonase                                                                                                |
| ACD61308  | 7.405473372 | 7.568579398 | 7.314098299  | 3-carboxy-cis,cis-muconate cycloisomerase                                                                                  |
| ACD61309  | 5.942507468 | 6.877597029 | 6.484141354  | protocatechuate 3,4-dioxygenase, alpha subunit                                                                             |
| ACD61310  | 6.483107958 | 7.259818574 | 7.314243347  | protocatechuate 3,4-dioxygenase, beta subunit                                                                              |
| ACD61311  | 6.332468061 | 6.740779183 | 5.999594185  | beta-ketoadipyl CoA thiolase                                                                                               |
| ACD61312  | 9.691089186 | 9.229592729 | 9.229191339  | glutaconate CoA transferase subunit B                                                                                      |
| ACD61315  | 7.085244053 | 6.799074351 | 6.062417493  | thioredoxin                                                                                                                |
| ACD61316  | 7.211391903 | 7.859379483 | 7.295869931  | ribonucleotide reductase-associated flavodoxin, putative                                                                   |
| ACD61317  | 8.73753129  | 8.363455838 | 9.268046007  | ribonucleoside-diphosphate reductase, beta subunit                                                                         |
| ACD61318  | 9.017106265 | 8.763633991 | 10.03945373  | ribonucleoside-diphosphate reductase, alpha subunit                                                                        |
| ACD61320  | 0           | 0           | 0            | hypothetical protein                                                                                                       |
| ACD61321  | 8.171381989 | 7.981201924 | 7.497189202  | integral membrane protein                                                                                                  |
| ACD61322  | 7.180794335 | 7.055239046 | 7.437901847  | acetyltransferase, gnat family                                                                                             |
| ACD61323  | 7.028900616 | 7.029971827 | 7.871424773  | conserved hypothetical protein                                                                                             |
| ACD61324  | 7.028955852 | 6.584771632 | 8.509616675  | magnesium transporter                                                                                                      |
| ACD61326  | 0.339479485 | 0           | -1.055657269 | ISXo8 transposase                                                                                                          |
| ACD61327  | 6.329677958 | 6.3626084   | 5.843905981  | glucose-6-phosphate 1-dehydrogenase                                                                                        |
| ACD61328  | 6.999007806 | 7.136058056 | 6.500795681  | glycosyl hydrolase, family 15                                                                                              |
| ACD61329  | 6.851786514 | 6.153550005 | 6.915461146  | phosphatase                                                                                                                |
| ACD61330  | 6.266550444 | 6.589679607 | 5.632242037  | ankyrin-like protein                                                                                                       |
| ACD61331  | 8.031714985 | 7.948530767 | 7.732119929  | conserved hypothetical protein                                                                                             |
| ACD61337  | 6.714204297 | 6.894126559 | 5.793185802  | 3-oxoacyl-[acyl-carrier-protein] reductase                                                                                 |
| ACD61338  | 9.604844148 | 0           | 9.871316954  | hypothetical protein                                                                                                       |
| ACD61339  | 8.100147187 | 7.660117152 | 8.372003102  | ISXoo2 transposase                                                                                                         |
| ACD61340  | 9.480194424 | 10.13189553 | 9.545317821  | hypothetical protein                                                                                                       |
| ACD61341  | 6.920733951 | 7.012769779 | 6.715220725  | 8-amino-7-oxononanoate synthase                                                                                            |
| ACD61342  | 7.767456176 | 7.834654338 | 8.157437891  | biotin synthase                                                                                                            |
| ACD61345  | 7.941669754 | 7.944249388 | 7.506819302  | 4-hydroxybenzoate polyprenyl transferase                                                                                   |
| ACD61349  | 7.654127595 | 7.659696266 | 7.165309016  | transmembrane regulator protein PrtR                                                                                       |
| ACD61350  | 7.575206424 | 7.68692767  | 8.125248139  | ECF sigma factor                                                                                                           |
| ACD61355  | 7.467369157 | 7.717649008 | 7.5116736    | RarD protein                                                                                                               |
| ACD61356  | 6.917801691 | 6.585112774 | 6.376033332  | integral membrane protein                                                                                                  |
| ACD61357  | 8.071553534 | 8.506299646 | 8.194333339  | drug/metabolite transporter superfamily protein                                                                            |
| ACD61359  | 10.78391495 | 8.915750934 | 0            | hypothetical protein                                                                                                       |
| ACD61360  | 6.879472976 | 6.797843067 | 6.728940868  | peptidase                                                                                                                  |

|           |              |             |              |                                                                                                                            |
|-----------|--------------|-------------|--------------|----------------------------------------------------------------------------------------------------------------------------|
| ACD61361  | 7.657797184  | 7.638863048 | 7.468762502  | metallo-beta-lactamase superfamily protein                                                                                 |
| ACD61362  | 6.933950258  | 6.938132856 | 7.039862192  | tryptophanyl-tRNA synthetase                                                                                               |
| ACD61363  | 12.13958972  | 13.39748747 | 12.15090551  | conserved domain protein                                                                                                   |
| ACD61364  | 12.18898439  | 13.22168831 | 13.41390555  | entericidin EcnA/B family                                                                                                  |
| ACD61365  | 11.47218312  | 12.97327045 | 14.27514968  | conserved domain protein                                                                                                   |
| ACD61366  | 6.372624809  | 5.710500646 | 6.7416827    | arginase                                                                                                                   |
| ACD61370  | 0            | 9.137677702 | 7.378589652  | hypothetical protein                                                                                                       |
| PXO_rna54 | 0            | 0           | 0            | XO_rna54 cdna:pseudogene<br>chromosome:GCA_000019585.1:Chromosome:4957642:4957717:-1<br>gene:PXO_rna54 transcript:PXO_rna5 |
| ACD61372  | 6.486714373  | 6.928701939 | 6.074882159  | conserved hypothetical protein                                                                                             |
| ACD61373  | 7.037832445  | 7.424980856 | 6.850411899  | transcriptional regulator                                                                                                  |
| ACD61374  | 6.697926686  | 7.254943564 | 6.204600487  | biotin-[acetyl-CoA-carboxylase] ligase                                                                                     |
| ACD61377  | 7.329859111  | 7.082798374 | 6.716126664  | conserved hypothetical protein                                                                                             |
| ACD61378  | 6.776538311  | 7.091043915 | 7.093623555  | conserved hypothetical protein                                                                                             |
| ACD61379  | 7.593002617  | 7.967992802 | 8.227668885  | two-component system sensor protein required for AvrXa21 activity H2 (raxH2)                                               |
| ACD61380  | 9.889494837  | 10.27639198 | 11.43527438  | two-component system regulatory protein (response regulator) required for AvrXa21 activity R2 (raxR2)                      |
| ACD61381  | 9.888916727  | 11.34640846 | 11.7592141   | conserved hypothetical protein                                                                                             |
| ACD61382  | 7.265502533  | 7.643560407 | 7.710730682  | tRNA-dihydrouridine synthase A                                                                                             |
| ACD61383  | 10.06545653  | 11.50912673 | 12.70451538  | putative membrane protein                                                                                                  |
| ACD61384  | 6.958053848  | 6.733191621 | 6.074584642  | ankyrin AnkB                                                                                                               |
| ACD61385  | 7.780598819  | 7.696918856 | 6.273819838  | catalase                                                                                                                   |
| ACD61386  | 9.706566813  | 9.890657962 | 9.524106784  | hypothetical protein                                                                                                       |
| ACD61387  | 7.127158631  | 7.029331405 | 6.99424028   | membrane-fusion protein                                                                                                    |
| ACD61389  | -11.14728381 | 0           | -8.454609773 | ISXo5 transposase                                                                                                          |
| ACD61390  | 6.583174555  | 5.21848671  | 5.933341298  | membrane-fusion protein                                                                                                    |
| ACD61391  | 7.04785462   | 6.821455119 | 6.615698782  | ATP-dependent helicase                                                                                                     |
| ACD61392  | 0            | 10.63797425 | 8.48614719   | conserved hypothetical protein                                                                                             |
| ACD61393  | 7.635805169  | 7.779929425 | 6.277421317  | conserved hypothetical protein                                                                                             |
| ACD61394  | 7.605427662  | 7.938720982 | 7.096620289  | shikimate dehydrogenase                                                                                                    |
| ACD61396  | 7.680936135  | 7.857396336 | 8.309767365  | iron-uptake factor                                                                                                         |
| ACD61398  | 6.333085562  | 6.011457621 | 6.074580361  | transcriptional regulator LysR family                                                                                      |
| ACD61401  | 7.555854491  | 7.990858451 | 8.434799173  | delta-aminolevulinic acid dehydratase                                                                                      |
| ACD61402  | 9.660741122  | 9.627433567 | 10.0880064   | conserved hypothetical protein                                                                                             |
| ACD61404  | 7.498011462  | 7.057731852 | 7.884152199  | conserved hypothetical protein                                                                                             |
| ACD61405  | 7.549399641  | 7.204228769 | 7.475587533  | dipeptidyl peptidase IV                                                                                                    |
| ACD61407  | 8.23878686   | 8.24104408  | 8.281508165  | glutathione S-transferase                                                                                                  |
| ACD61408  | 9.176784014  | 8.271687118 | 9.007122602  | hypothetical protein                                                                                                       |
| ACD61414  | 7.606782726  | 7.543209729 | 6.980093868  | ABC transporter sodium permease                                                                                            |
| ACD61415  | 7.60533876   | 7.056149961 | 7.200722088  | sodium ABC transporter ATP-binding protein                                                                                 |
| ACD61416  | 6.652816298  | 6.725972863 | 6.715673766  | cysteine proteinase                                                                                                        |
| ACD61417  | 9.669746091  | 9.456512538 | 8.314333994  | helix-turn-helix, putative                                                                                                 |
| ACD61418  | 8.276394304  | 8.096815283 | 8.063724032  | membrane protein, putative                                                                                                 |
| ACD61419  | 0            | 7.765932493 | 8.203196261  | hypothetical protein                                                                                                       |
| ACD61420  | 8.701205946  | 8.327206805 | 8.415543199  | conserved hypothetical protein                                                                                             |
| ACD61422  | 7.706972521  | 7.091054496 | 6.6289908    | phenol hydroxylase                                                                                                         |
| ACD61428  | 4.809347556  | 9.428464864 | 3.600091309  | ISXoo13 transposase                                                                                                        |
| ACD61429  | 8.013724646  | 8.406630203 | 7.514035443  | putative ISXoo14 transposase                                                                                               |
| ACD61433  | 7.361742045  | 7.287379944 | 7.265849421  | IS66 family element, Orf1 protein, putative                                                                                |
| ACD61439  | 6.500934273  | 7.691771431 | 9.6571094    | conserved hypothetical protein                                                                                             |
| ACD61441  | 7.255462966  | 6.805060244 | 6.976191767  | D-alanine--D-alanine ligase A                                                                                              |
| ACD61447  | 7.288496992  | 6.961600178 | 7.476098111  | conserved hypothetical protein                                                                                             |
| ACD61451  | 8.446024586  | 4.917484268 | 7.813595232  | hypothetical protein                                                                                                       |
| ACD61453  | 8.519388575  | 8.588714636 | 7.700210811  | XopN effector                                                                                                              |
| ACD61454  | 0            | 0           | 0            | ISXo5 transposase                                                                                                          |
| ACD61455  | 4.872523447  | 4.853776133 | 4.995081955  | ISXoo5 transposase                                                                                                         |
| ACD61456  | 7.500786122  | 7.520367243 | 6.677719642  | conserved hypothetical protein                                                                                             |
| ACD61457  | 7.252116631  | 7.473786912 | 6.630194306  | L-fucose\x3aH+ symporter permease                                                                                          |
| ACD61462  | 7.059084833  | 6.995032192 | 6.51191233   | two-component system sensor protein                                                                                        |
| ACD61465  | 6.827399871  | 6.49562002  | 5.872080137  | NdvB protein                                                                                                               |
| ACD61466  | 7.544779014  | 7.209082896 | 6.569671843  | cation symporter                                                                                                           |
| ACD61469  | 8.687708104  | 7.738274697 | 8.235324979  | conserved hypothetical protein                                                                                             |
| ACD61470  | 7.293030151  | 7.375708478 | 7.547673459  | 3-dehydroquinate dehydratase                                                                                               |
| ACD61471  | 7.367598216  | 7.074687389 | 7.444783002  | conserved hypothetical protein                                                                                             |

|          |             |              |             |                                                                                                                         |
|----------|-------------|--------------|-------------|-------------------------------------------------------------------------------------------------------------------------|
| ACD61474 | 0.420401554 | -0.002545716 | 0           | ISXo8 transposase                                                                                                       |
| ACD61477 | 0           | 0            | 0           | IS1112 transposase                                                                                                      |
| ACD61481 | 8.051431923 | 8.835112456  | 8.403991956 | conserved hypothetical protein                                                                                          |
| ACD61488 | 9.508416767 | 8.192312543  | 8.844457841 | extracellular protease                                                                                                  |
| ACD61489 | 4.325954803 | 4.335890521  | 4.053267765 | transposase                                                                                                             |
| ACD61490 | 10.21176665 | 9.916836378  | 10.28726219 | ISXoo11 transposase                                                                                                     |
| ACD61491 | 0           | 0            | 1.537017691 | ISXoo12 transposase                                                                                                     |
| ACD61495 | 7.123790333 | 6.7924129    | 7.275379596 | formamidopyrimidine-DNA glycosylase                                                                                     |
| PXO_ma57 | 0           | 0            | 0           | XO_ma57 cdna:pseudogene<br>chromosome:GCA_000019585.1:Chromosome:5086533:5086609:-1<br>gene:PXO_ma57 transcript:PXO_ma5 |
| PXO_ma58 | 0           | 0            | 0           | XO_ma58 cdna:pseudogene<br>chromosome:GCA_000019585.1:Chromosome:5086629:5086704:-1<br>gene:PXO_ma58 transcript:PXO_ma5 |
| ACD61503 | 7.627548475 | 7.427036222  | 7.171316931 | GAF domain protein                                                                                                      |
| ACD61504 | 7.403778984 | 8.286506937  | 6.638790661 | conserved hypothetical protein                                                                                          |
| ACD61505 | 7.086433493 | 7.047898232  | 6.401041624 | tetracycline-efflux transporter                                                                                         |
| ACD61506 | 6.14811046  | 6.47740534   | 6.264239905 | transglycolase                                                                                                          |
| ACD61508 | 7.302474427 | 9.612936669  | 9.915000949 | conserved hypothetical protein                                                                                          |
| ACD61509 | 8.014996819 | 7.740428412  | 7.887665391 | SEC-C motif                                                                                                             |
| ACD61510 | 7.861880945 | 7.45149138   | 7.989763465 | transposase                                                                                                             |
| ACD61511 | 7.127065747 | 7.41100246   | 7.903182918 | transposase, IS30 family                                                                                                |
| ACD61512 | 8.129416975 | 8.749353249  | 7.597151232 | endoglucanase                                                                                                           |
| ACD61513 | 10.11681179 | 10.09189814  | 6.539717166 | hypothetical protein                                                                                                    |
| ACD61514 | 9.862280901 | 9.421469479  | 7.99791899  | endoglucanase                                                                                                           |
| ACD61515 | 8.060787786 | 8.378039029  | 10.41301434 | endoglucanase                                                                                                           |
| ACD61516 | 9.469128949 | 9.462571798  | 7.834629058 | conserved hypothetical protein                                                                                          |
| ACD61518 | 0           | 0            | 0           | ISXo8 transposase                                                                                                       |
| ACD61519 | 5.80095683  | 5.483483677  | 5.483409509 | ISXo8 transposase                                                                                                       |
| ACD61524 | 6.485743992 | 5.764120531  | 5.298255067 | TonB-dependent Receptor                                                                                                 |
| ACD61525 | 5.931274109 | 5.908563152  | 6.335233124 | ferripyoverdine receptor                                                                                                |
| ACD61526 | 7.263015621 | 8.387961299  | 6.739942587 | ferripyoverdine receptor                                                                                                |
| ACD61527 | 7.086401646 | 7.607485673  | 6.343247909 | transcriptional regulator AsnC family                                                                                   |
| ACD61530 | 7.666926979 | 6.930512638  | 6.359236511 | rhamnogalacturonan acetyltransferase                                                                                    |
| ACD61532 | 7.205793249 | 7.386414358  | 6.782696865 | sugar-phosphate isomerase                                                                                               |
| ACD61533 | 0           | 0            | 0           | transposase                                                                                                             |
| ACD61534 | 0           | 0            | 0           | ISXoo3 transposase ORF A                                                                                                |
| ACD61536 | 11.19574744 | 11.15180936  | 9.268336137 | hypothetical protein                                                                                                    |
| ACD61537 | 9.997687581 | 9.711537925  | 7.936402378 | conserved hypothetical protein                                                                                          |
| ACD61538 | 7.538972645 | 7.131877534  | 6.833838844 | 2,5-diketo-D-gluconic acid reductase B                                                                                  |
| ACD61539 | 6.70104996  | 7.104787432  | 7.208000191 | quinone oxidoreductase                                                                                                  |
| ACD61540 | 7.925738381 | 8.105389988  | 9.340277405 | oxidoreductase                                                                                                          |
| ACD61543 | 11.0214242  | 10.25860136  | 11.39064189 | hypothetical protein                                                                                                    |
| ACD61544 | 10.13428512 | 11.37526212  | 11.98789994 | conserved hypothetical protein                                                                                          |
| ACD61545 | 6.193566756 | 6.194284085  | 5.894812914 | ATP-dependent RNA helicase                                                                                              |
| ACD61547 | 8.629986751 | 8.673312609  | 9.604388287 | YehS                                                                                                                    |
| ACD61549 | 8.018127834 | 8.069605508  | 7.432182748 | RTS beta protein                                                                                                        |
| ACD61550 | 8.284814848 | 8.694187226  | 7.645953785 | 2-hydroxyhepta-2,4-diene-1, 7-dioateisomerase/5-carboxymethyl-2-oxo-hex-3-ene-1, 7-dioatedecarboxylase                  |
| ACD61551 | 8.812495016 | 8.857561184  | 8.971549302 | dehydrogenase/reductase SDR family member 6                                                                             |
| ACD61552 | 7.584391321 | 8.153673623  | 7.212005068 | hydrolase                                                                                                               |
| ACD61553 | 7.367100185 | 7.705770603  | 6.650276303 | oxidoreductase                                                                                                          |
| ACD61556 | 8.724796907 | 8.289147436  | 8.36055303  | putative secreted protein                                                                                               |
| ACD61557 | 7.25772726  | 7.767595214  | 7.053893309 | hypothetical protein                                                                                                    |
| ACD61558 | 8.269954179 | 8.543364414  | 9.237592398 | two-component system regulatory protein                                                                                 |
| ACD61559 | 7.82498419  | 8.231153965  | 9.879760895 | acetate--CoA ligase                                                                                                     |
| ACD61565 | 6.427292728 | 6.285466954  | 6.092552084 | transcriptional regulator                                                                                               |
| ACD61568 | 11.47697398 | 11.30700722  | 11.02570019 | transglycosylase associated protein                                                                                     |
| ACD61571 | 6.488688523 | 6.273073838  | 9.271355639 | alkaline phosphatase                                                                                                    |
| ACD61572 | 6.708394188 | 6.327857992  | 9.017056143 | alkaline phosphatase D                                                                                                  |
| ACD61574 | 7.649356785 | 6.655022605  | 8.706534006 | hypothetical protein                                                                                                    |
| ACD61578 | 8.374530922 | 8.20012373   | 8.258745035 | 4-oxalomesaconate hydratase                                                                                             |
| ACD61579 | 6.866796731 | 6.733666168  | 6.644332201 | FldA                                                                                                                    |
| ACD61580 | 7.524659241 | 7.102458676  | 7.346797369 | 4-carboxy-4-hydroxy-2-oxoadipate aldolase/oxaloacetate decarboxylase                                                    |
| ACD61583 | 12.41153482 | 12.41084351  | 12.20013231 | lactoylglutathione lyase-related lyase                                                                                  |



|          |             |             |              |                                                 |
|----------|-------------|-------------|--------------|-------------------------------------------------|
| ACD61586 | 9.295243179 | 8.546840454 | 8.856276116  | putative secreted protein                       |
| ACD61587 | 4.281631491 | 4.026454833 | 3.721886644  | ISXo5 transposase                               |
| ACD61588 | 6.989638595 | 7.113033665 | 6.537510405  | amino acid transporter                          |
| ACD61594 | 7.341354252 | 7.266383654 | 7.383324131  | transposase                                     |
| ACD61596 | 6.83673208  | 6.740252994 | 6.570642042  | radical SAM domain protein                      |
| ACD61597 | 8.823762096 | 8.784939055 | 9.206474734  | outer membrane protein                          |
| ACD61601 | 7.120092693 | 7.191710687 | 7.444807845  | carboxyl-terminal protease                      |
| ACD61602 | 6.208318259 | 6.767535628 | 6.433133055  | M23 peptidase domain protein                    |
| ACD61605 | 8.124322965 | 7.421273801 | 8.390431241  | conserved hypothetical protein                  |
| ACD61606 | 0           | 0           | 0            | ISXo8 transposase                               |
| ACD61608 | 6.529959901 | 6.599966385 | 5.874351894  | conserved hypothetical protein                  |
| ACD61609 | 6.830039776 | 6.795000624 | 6.799255714  | putative ATP-binding protein                    |
| ACD61610 | 7.251548685 | 6.98232054  | 7.206281802  | conserved hypothetical protein                  |
| ACD61611 | 7.66835318  | 7.276198865 | 7.161635793  | conserved hypothetical protein                  |
| ACD61612 | 7.661193777 | 6.832687516 | 6.646479508  | hypothetical protein                            |
| ACD61613 | 8.694424056 | 8.336118218 | 8.795413061  | conserved hypothetical protein                  |
| ACD61614 | 6.381683104 | 6.425966119 | 7.21451341   | GTP cyclohydrolase I                            |
| ACD61618 | 6.983563697 | 7.081414198 | 6.72816542   | dicarboxylate transport protein                 |
| ACD61619 | 7.858944543 | 7.830990481 | 8.303780748  | conserved hypothetical protein                  |
| ACD61622 | 7.335211682 | 6.878676303 | 7.702241961  | conserved hypothetical protein                  |
| ACD61626 | 0           | 6.06894806  | 0            | transposase                                     |
| ACD61627 | 9.994296859 | 9.633574703 | 8.831741096  | transposase                                     |
| ACD61628 | 4.314029397 | 4.298628992 | 4.155797797  | IS1112 transposase                              |
| ACD61629 | 0           | 0           | 0            | hypothetical protein                            |
| ACD61630 | 9.122564016 | 8.904423884 | 8.349860624  | conserved hypothetical protein                  |
| ACD61631 | 10.3614065  | 10.09699181 | 9.787678957  | conserved hypothetical protein                  |
| ACD61632 | 11.72531939 | 11.87474318 | 10.78060538  | paar motif family                               |
| ACD61633 | 3.915903274 | 2.947153689 | 3.620398731  | transposase                                     |
| ACD61634 | 0           | 0           | 0.309804828  | transposase                                     |
| ACD61636 | 0           | 0           | 0            | bleomycin resistance protein                    |
| ACD61637 | 12.0709796  | 11.99174858 | 11.06993305  | putative secreted protein                       |
| ACD61638 | 9.082556239 | 9.357945613 | 8.267507708  | conserved hypothetical protein                  |
| ACD61639 | 10.06239698 | 8.59458587  | 10.4910213   | conserved hypothetical protein                  |
| ACD61640 | 8.426868547 | 7.086815605 | 7.035810832  | conserved hypothetical protein                  |
| ACD61641 | 7.006701958 | 6.31242376  | 5.899782266  | sugar diacyl regulator                          |
| ACD61642 | 5.953581871 | 5.910684699 | 5.861139028  | glycerate kinase                                |
| ACD61643 | 6.568816494 | 6.804750569 | 6.521829682  | MFS transporter                                 |
| ACD61644 | 6.521016177 | 6.587671021 | 5.903016572  | dipeptidase                                     |
| ACD61645 | 8.49097118  | 8.517208754 | 7.732839     | conserved hypothetical protein                  |
| ACD61646 | 8.053540388 | 7.946567121 | 8.266753752  | oxidoreductase                                  |
| ACD61649 | 7.11904486  | 6.855728135 | 6.593531557  | glycerophosphoryl diester phosphodiesterase     |
| ACD61651 | 6.345644752 | 6.422125333 | 6.109722024  | tRNA modification GTPase TrmE                   |
| ACD61652 | 7.293664762 | 6.903737268 | 7.121906446  | polysaccharide deacetylase                      |
| ACD61653 | 8.056843606 | 8.114877126 | 7.957467749  | 60 kDa inner-membrane protein                   |
| ACD61654 | 10.43502429 | 10.42720807 | 9.962483954  | ribonuclease P protein component                |
| ACD61655 | 14.60409565 | 15.56079853 | 14.80180938  | ribosomal protein L34                           |
| ACD59187 | 0           | 0           | 0.813787347  | flagellar basal body-associated protein FlIL    |
| ACD59442 | 1.185955324 | 0           | 0            | ISXoo5 transposase                              |
| ACD60331 | 9.844581808 | 9.902494204 | 8.693190722  | EvpB                                            |
| ACD59156 | 0           | 0           | 0            | flagellar L-ring protein FlgH                   |
| ACD59143 | 0           | 0           | 0            | sensory box histidine kinase                    |
| ACD59112 | 0           | 0           | 0            | type IV pilus biogenesis/stability protein PilW |
| ACD60342 | 8.315226564 | 8.039692242 | 8.897924091  | Rhs element Vgr protein                         |
| ACD60354 | 7.632748064 | 8.486050626 | 8.397032817  | hydrolase                                       |
| ACD59124 | 0           | 0           | 0            | putative secreted protein                       |
| ACD59153 | 0           | 0           | 7.163408158  | flagellar biosynthesis hook protein             |
| ACD59073 | 0           | 0           | 0            | C-type cytochrome biogenesis protein            |
| ACD59089 | 0           | 0           | -1.757262148 | ISXo8 transposase                               |
| ACD59087 | 0           | 0           | 0            | conserved hypothetical protein                  |
| ACD59218 | 6.694852341 | 6.068184958 | 4.682247418  | ISXoo5 transposase                              |
| ACD58795 | 0           | 0           | 0            | ISXoo5 transposase                              |
| ACD59082 | 0           | 0           | 0            | sugar aldolase                                  |
| ACD59110 | 0           | 0           | 0            | conserved hypothetical protein                  |
| ACD60332 | 10.35868416 | 10.63627115 | 9.907096466  | EvpA                                            |

|          |             |              |              |                                                  |
|----------|-------------|--------------|--------------|--------------------------------------------------|
| ACD59210 | 0           | 0            | 2.561985922  | transposase                                      |
| ACD59127 | 0           | 0            | 0            | DNA translocase FtsK                             |
| ACD59181 | 0           | 0            | 6.127874672  | flagellar M-ring protein FliF                    |
| ACD59114 | 0           | 0            | 0            | nucleoside diphosphate kinase                    |
| ACD58018 | 0           | 0            | 0            | hypothetical protein                             |
| ACD59150 | 0           | 0            | 0            | flagellar basal-body rod protein FlgB            |
| ACD60364 | 9.70860111  | 9.981938254  | 9.214678535  | conserved hypothetical protein                   |
| ACD59162 | 0           | 0            | 7.004467684  | flagellar protein                                |
| ACD59216 | 0           | 0            | 0            | RHS Repeat family                                |
| ACD60560 | 10.44077575 | 12.36467365  | 12.6672535   | putative membrane protein                        |
| ACD59418 | 9.873653273 | 9.590379332  | 0            | putative membrane protein                        |
| ACD58180 | 0           | 0            | 0            | hypothetical protein                             |
| ACD59246 | 0           | 0            | -0.792292025 | ISXo8 transposase                                |
| ACD57075 | 0           | 0            | 0            | ISXo8 transposase                                |
| ACD59444 | 0           | 0            | 0            | ISXo8 transposase                                |
| ACD59201 | 0           | 0            | 0            | conserved hypothetical protein                   |
| ACD59229 | 0           | 0            | 0            | transcriptional regulator                        |
| ACD59091 | 0           | 0            | 0            | ISXo8 transposase                                |
| ACD59138 | 0           | 0            | 0            | conserved hypothetical protein                   |
| ACD60379 | 8.54382837  | 8.999157243  | 7.954289384  | twitching motility protein                       |
| ACD59209 | 0           | 0            | 0            | ISXo2 putative transposase                       |
| ACD59223 | 0           | -2.097949581 | 2.99787226   | Tal7a, TAL effector AvrBs3/PthA                  |
| ACD59227 | -1.47903372 | -2.256941803 | -3.020996102 | Tal7b, TAL effector AvrBs3/PthA                  |
| ACD57395 | 0           | 0            | 4.174078787  | ISXoo11 transposase                              |
| ACD60356 | 2.570679076 | 1.595599137  | 3.893964017  | ISXo8 transposase                                |
| ACD59105 | 0           | 0            | 0            | transposase                                      |
| ACD61091 | 0           | 0            | 0            | ISXoo12 transposase                              |
| ACD60229 | 0           | 0            | 0            | ISXoo12 transposase                              |
| ACD59922 | 0           | 0            | 0            | putative transposase                             |
| ACD59758 | 0           | 0            | 0            | IS1112 transposase                               |
| ACD58791 | 0           | 0            | 1.180345215  | IS1112 transposase                               |
| ACD59175 | 0           | 0            | 0            | acetyltransferase                                |
| ACD59236 | 0           | 0            | 0            | TonB family C-terminal domain protein            |
| ACD59121 | 0           | 0            | 0            | conserved hypothetical protein                   |
| ACD57143 | 4.544077299 | 4.183438874  | 3.182218736  | IS66 family element, Orf1 protein, putative      |
| ACD57355 | 0           | 0            | 0            | conserved hypothetical protein                   |
| ACD59076 | 0           | 0            | 0            | conserved hypothetical protein                   |
| ACD59195 | 0           | 0            | 0            | Putative signal protein with GGDEF domain        |
| ACD59081 | 0           | 0            | 0            | cationic amino acid transporter                  |
| ACD59241 | 0           | 0            | 0            | ISXo3 transposase ORF B                          |
| ACD59074 | 0           | 0            | 0            | conserved domain protein                         |
| ACD59071 | 0           | 0            | 0            | C-type cytochrome biogenesis protein/thioredoxin |
| ACD59251 | 3.343507315 | 1.651104517  | 2.373486743  | IS1113 transposase                               |
| ACD58538 | 8.591200673 | 8.634938074  | 9.390863261  | IS1113 transposase                               |
| ACD59923 | 0           | 0            | 0            | IS1113 transposase                               |
| ACD59433 | 0           | 0            | 0            | ISXo8 transposase                                |
| ACD59197 | 0           | 0            | 0            | Putative signal protein with GGDEF domain        |
| ACD60368 | 8.065469991 | 8.661977568  | 8.034672429  | peroxiredoxin OsmC                               |
| ACD59192 | 0           | 0            | 0            | hypothetical protein                             |
| ACD60367 | 8.735874143 | 9.084114771  | 11.47870896  | rickettsia 17 kDa surface antigen family         |
| ACD58665 | 0           | 0            | 0            | ISXoo12 transposase                              |
| ACD59098 | 0           | 4.751099466  | 4.979604681  | conserved domain protein                         |
| ACD59290 | 0           | 4.686511733  | 1.394503167  | transposase, IS30 family                         |
| ACD59064 | 0           | 0            | 0            | succinyldiaminopimelate transaminase             |
| ACD60353 | 12.71699089 | 11.91724899  | 12.15607992  | hypothetical protein                             |
| ACD59176 | 0           | 0            | 0            | ring hydroxylating dioxygenase alpha-subunit     |
| ACD59219 | 0           | 0            | 0            | transposase                                      |
| ACD59133 | 0           | 0            | 0            | translation initiation factor IF-1               |
| ACD59065 | 0           | 0            | 0            | heme ABC exporter, ATP-binding protein CcmA      |
| ACD59190 | 0           | 0            | 0            | flagellar protein                                |
| ACD60347 | 6.61845011  | 6.102597248  | 6.570046943  | conserved hypothetical protein                   |
| ACD59189 | 0           | 0            | 0            | flagellar protein                                |
| ACD59220 | 6.196841101 | 0            | 6.462117775  | transposase                                      |
| ACD59111 | 0           | 0            | 0            | conserved hypothetical protein                   |

|          |             |             |              |                                                                            |
|----------|-------------|-------------|--------------|----------------------------------------------------------------------------|
| ACD58674 | 0           | 0           | 0            | ISXo3 transposase ORF A                                                    |
| ACD60935 | 0           | 0           | 0            | ISXo3 transposase ORF B                                                    |
| ACD60592 | 0           | 0           | 0            | ISXo3 transposase ORF B                                                    |
| ACD61272 | 0           | 0           | 0            | ISXoo3 transposase ORF A                                                   |
| ACD56922 | 0           | 0           | 0            | ISXoo3 transposase ORF A                                                   |
| ACD60683 | 0           | 4.093560176 | 0            | ISXoo3 transposase ORF A                                                   |
| ACD59430 | 0           | 0           | 0            | ISXoo3 transposase ORF A                                                   |
| ACD59230 | 0           | 0           | 0            | acyl carrier protein phosphodiesterase                                     |
| ACD59200 | 0           | 0           | 0            | flagellar biosynthesis protein FlhA                                        |
| ACD59239 | 0           | 0           | 0            | transposase                                                                |
| ACD59182 | 0           | 0           | 6.300652738  | flagellar motor switch protein FlhG                                        |
| ACD59177 | 0           | 0           | 0            | conserved hypothetical protein                                             |
| ACD59167 | 0           | 0           | 13.6291289   | RNA polymerase sigma-54 factor                                             |
| ACD59228 | 0           | 0           | 0            | phage-related integrase                                                    |
| ACD60349 | 8.418413454 | 8.282916979 | 6.997326284  | conserved hypothetical protein                                             |
| ACD59234 | 0           | 0           | 0            | seryl-tRNA synthetase                                                      |
| ACD59101 | 0           | 0           | 0            | hypothetical protein                                                       |
| ACD60361 | 10.25083133 | 9.465609257 | 9.01664117   | AsmA family protein                                                        |
| ACD59144 | 0           | 0           | 0            | Putative signal protein with GGDEF, EAL and two component receiver domains |
| ACD58690 | 0           | 0           | 0            | transposase                                                                |
| ACD59126 | 0           | 0           | 0            | conserved hypothetical protein                                             |
| ACD60346 | 4.744263373 | 4.775456209 | 4.487389875  | conserved hypothetical protein                                             |
| ACD59070 | 0           | 0           | 0            | cytochrome c-type biogenesis protein CcmF                                  |
| ACD59108 | 0.331510322 | 0           | 0            | GTP-binding protein                                                        |
| ACD60389 | 8.197511592 | 8.048672137 | 7.334943631  | intracellular protease I                                                   |
| ACD59113 | 0           | 0           | 0            | radical SAM enzyme, Cfr family                                             |
| ACD59142 | 0           | 0           | 0            | Putative signal protein with PAS(PAC), GGDEF and EAL domains               |
| ACD59096 | 0           | 0           | 0            | ISXo8 transposase                                                          |
| ACD59232 | 0           | 0           | -0.968116459 | ISXo8 transposase                                                          |
| ACD57812 | 0.42183459  | 0           | 0            | ISXo8 transposase                                                          |
| ACD60243 | 0           | 0           | 0            | ISXo8 transposase                                                          |
| ACD58196 | 0           | 0           | 0            | ISXo8 transposase                                                          |
| ACD59212 | 0           | 0           | 0            | ISXo8 transposase                                                          |
| ACD59860 | 0           | 0           | 0            | conserved hypothetical protein                                             |
| ACD59080 | 0           | 0           | 0            | cationic amino acid transporter                                            |
| ACD60348 | 6.321780211 | 6.432799099 | 6.799022528  | Rhs element Vgr protein                                                    |
| ACD59191 | 0           | 0           | 0            | flagellar biosynthetic protein                                             |
| ACD59088 | 0           | 0           | 0            | conserved hypothetical protein                                             |
| ACD59723 | 0           | 0           | 0            | ISXo7 transposase                                                          |
| ACD60343 | 6.801973435 | 6.389269088 | 6.884512451  | conserved hypothetical protein                                             |
| ACD60345 | 5.254132924 | 5.264074725 | 5.905849075  | conserved hypothetical protein                                             |
| ACD59206 | 0           | 0           | 0            | chemotaxis phosphatase CheZ                                                |
| ACD59183 | 0           | 0           | 0            | flagellar assembly protein FliH                                            |
| ACD59146 | 0           | 0           | 0            | conserved hypothetical protein                                             |
| ACD59173 | 0           | 0           | 0            | 3-oxoacyl-reductase                                                        |
| ACD59205 | 0           | 0           | 0            | chemotaxis response regulator CheY                                         |
| ACD59157 | 0           | 0           | 4.544411197  | flagellar P-ring protein FlgI                                              |
| ACD59186 | 0.548495811 | 3.014291013 | 2.627174899  | flagellar protein                                                          |
| ACD59069 | 0           | 0           | 0            | C-type cytochrome biogenesis protein                                       |
| ACD59155 | 0           | 0           | 8.511179414  | flagellar basal-body rod protein FlgG                                      |
| ACD59204 | 0           | 0           | 0            | RNA polymerase sigma factor FliA                                           |
| ACD57871 | 0.691587763 | 0           | 0            | translation elongation factor Tu                                           |
| ACD59067 | 0           | 0           | 0            | ABC transporter heme permease                                              |
| ACD59129 | 0           | 0           | 0            | protein of unknown function                                                |
| ACD60344 | 7.412154867 | 6.06707075  | 8.440262901  | conserved hypothetical protein                                             |
| ACD59235 | 0           | 0           | 0            | TonB protein                                                               |
| ACD59132 | 0           | 0           | 0            | leucyl/phenylalanyl-tRNA--protein transferase                              |
| ACD59179 | 0           | 0           | 0            | O-antigen biosynthesis protein                                             |
| ACD60371 | 9.542441858 | 10.29050274 | 6.430517785  | conserved hypothetical protein                                             |
| ACD56842 | 0           | 0           | 0            | conserved domain protein                                                   |
| ACD59104 | 0           | 0           | 0            | ISXo3 transposase ORF B                                                    |
| ACD59170 | 0           | 0           | 6.250135424  | nucleotide sugar transaminase                                              |
| ACD59115 | 0           | 0           | 0            | transcriptional regulator TetR family                                      |

|          |             |             |              |                                                   |
|----------|-------------|-------------|--------------|---------------------------------------------------|
| ACD59086 | 0           | 0           | 0            | hypothetical protein                              |
| ACD61021 | 2.991841981 | 0           | -0.894260247 | ISXoo8 transposase                                |
| ACD59172 | 0           | 0           | 0            | 3-oxoacyl-synthase                                |
| ACD59106 | 3.330085073 | 0           | 2.28681315   | ISXoo2 transposase                                |
| ACD59141 | 0           | 0           | 0            | conserved hypothetical protein                    |
| ACD59208 | 0           | 0           | 0            | transposase                                       |
| ACD59095 | 3.077526724 | 0           | -0.142663884 | transposase (IS4 family) protein                  |
| ACD60330 | 12.23968504 | 12.55618989 | 11.68046062  | Hcp family protein                                |
| ACD57610 | 0           | 0           | 0            | ISXoo12 transposase                               |
| ACD60370 | 8.32925817  | 8.322784441 | 8.32152228   | aspartate carbamoyltransferase                    |
| ACD58009 | 0           | 0.536251879 | 0            | ISXo1 transposase                                 |
| ACD58193 | 0           | 0           | -0.499226495 | ISXo1 transposase                                 |
| ACD57481 | 0           | 2.855144557 | 0            | ISXo1 transposase                                 |
| ACD59281 | 0           | 0           | 0            | ISXo1 transposase                                 |
| ACD60599 | 0           | 0           | 0            | ISXo1 transposase                                 |
| ACD60360 | 7.146023823 | 7.475311908 | 7.106620516  | dienelactone hydrolase                            |
| ACD59185 | 0           | 0           | 0            | flagellar export protein Flj                      |
| ACD59164 | 0           | 0           | 9.463608153  | conserved hypothetical protein                    |
| ACD59203 | 0           | 0           | 0            | flagellar synthesis regulator FlcN                |
| ACD59242 | 0           | 0           | 0            | ISXo5 transposase                                 |
| ACD57356 | 0.961401073 | 0           | 0            | ISXo5 transposase                                 |
| ACD59214 | 0           | 0           | 0            | ISXo5 transposase                                 |
| ACD59094 | 0           | 0           | 0            | ISXo5 transposase                                 |
| ACD60355 | 5.602492512 | 5.41986919  | 6.300409306  | ISXo5 transposase                                 |
| ACD59249 | 0           | 0           | 0            | hypothetical protein                              |
| ACD57358 | 9.062774724 | 9.836449645 | 12.20458948  | transposase                                       |
| ACD59102 | 0           | 0           | 0            | putative transposase                              |
| ACD59119 | 0           | 0           | 0            | conserved hypothetical protein                    |
| ACD59158 | 0           | 0           | 0            | flagellar rod assembly protein/muramidase FlgJ    |
| ACD60362 | 7.505446369 | 7.701798541 | 6.923886032  | UDP-N-acetylmuramoylalanine--D-glutamate ligase   |
| ACD59148 | 0           | 0           | 0            | flagella basal body P-ring formation protein FlgA |
| ACD60369 | 9.429446496 | 9.132695075 | 9.331597741  | hypothetical protein                              |
| ACD59196 | 0           | 0           | 0            | hypothetical protein                              |
| ACD59221 | 11.38429809 | 0           | 0            | conserved hypothetical protein                    |
| ACD59202 | 0           | 0           | 6.651754923  | flagellar biosynthetic protein FlhF               |
| ACD59166 | 0           | 0           | 8.686976678  | response regulator                                |
| ACD59139 | 0           | 0           | 10.97557574  | chemotaxis protein                                |
| ACD59440 | 0           | 0           | 0            | integral membrane protein                         |
| ACD60363 | 7.318488581 | 7.68210974  | 6.76879304   | conserved hypothetical protein                    |
| ACD59184 | 0           | 0           | 0            | flagellum-specific ATP synthase                   |
| ACD59128 | 0           | 0           | 0            | thioredoxin-disulfide reductase                   |
| ACD59207 | 0           | 0           | 0            | chemotaxis protein CheA                           |
| ACD59180 | 0           | 0           | 0            | flagellar hook-basal body complex protein (FlhE)  |
| ACD59199 | 0           | 0           | 0            | flagellar biosynthetic protein FlhB               |
| ACD59169 | 0           | 0           | 0            | transcriptional regulator                         |
| ACD59125 | 0           | 0           | 0            | outer membrane lipoprotein carrier protein LolA   |
| ACD59154 | 0           | 0           | 0            | flagellar basal-body rod protein FlgF             |
| ACD59159 | 0           | 0           | 0.883886654  | flagellar hook-associated protein FlgK            |
| ACD59168 | 0           | 0           | 11.91588685  | response regulator                                |
| ACD59117 | 0           | 0           | 0            | 3-ketoacyl-CoA thiolase                           |
| ACD59122 | 0           | 0           | 0            | ATPase                                            |
| ACD60358 | 8.75420941  | 8.894005261 | 9.408718229  | single-stranded DNA binding protein               |
| ACD59066 | 0           | 0           | 0            | heme exporter protein CcmB                        |
| ACD60377 | 7.246759597 | 7.876467833 | 6.583025585  | conserved hypothetical protein, putative          |
| ACD59161 | 8.480834622 | 11.74486747 | 15.5482319   | flagellar protein                                 |
| ACD59075 | 0           | 0           | 0            | conserved hypothetical protein                    |
| ACD59123 | 0           | 0           | 0            | hypothetical protein                              |
| ACD59085 | 0           | 0           | 0            | conserved hypothetical protein                    |
| ACD59174 | 0           | 0           | 0            | dehydrogenase with different specificities        |
| ACD59151 | 0           | 8.443904972 | 10.78416041  | flagellar basal-body rod protein FlgC             |
| ACD59116 | 0           | 0           | 0            | 3-hydroxyacyl-CoA dehydrogenase                   |
| ACD58357 | 0           | 0.045834347 | -0.058201061 | xylose isomerase                                  |
| ACD59193 | 0           | 0           | 0            | flagellar biosynthesis pathway component FlhQ     |
| ACD59078 | 0           | 0           | 0            | D-3-phosphoglycerate dehydrogenase                |

|          |             |             |              |                                                              |
|----------|-------------|-------------|--------------|--------------------------------------------------------------|
| ACD60333 | 11.75480401 | 11.91568148 | 11.64798     | TPR repeat protein                                           |
| ACD56884 | 0           | 0           | 0            | paar motif family                                            |
| ACD59118 | 0           | 0           | 0            | Cl-channel, voltage gated                                    |
| ACD59083 | 0           | 4.072671789 | 0            | dioxygenase                                                  |
| ACD60365 | 8.488972848 | 8.49228584  | 8.961715924  | bifunctional diaminopimelate decarboxylase/asparta           |
| ACD59092 | 0           | 0           | 0            | molybdopterin biosynthesis protein                           |
| ACD61227 | 0           | 0           | 0            | ISxac3 transposase                                           |
| ACD59152 | 0           | 0           | 11.71765072  | flagellar protein                                            |
| ACD60378 | 8.594361931 | 8.693389381 | 7.414727512  | twitching motility protein                                   |
| ACD59165 | 0           | 0           | 0            | conserved hypothetical protein                               |
| ACD59137 | 0           | 0           | 0            | tRNA (5-methylaminomethyl-2-thiouridylate)-methyltransferase |
| ACD60350 | 7.646479508 | 7.556567363 | 8.587526265  | pirin                                                        |
| ACD60372 | 7.949978412 | 8.074628524 | 7.51465883   | conserved hypothetical protein                               |
| ACD59188 | 0           | 0           | 5.147416606  | flagellar motor switch protein FliM                          |
| ACD59068 | 0           | 0           | 8.674227585  | conserved domain protein                                     |
| ACD58949 | 0           | 0           | 0            | probable transmembrane protein                               |
| ACD60558 | 0           | 0           | 0            | similar to membrane-bound transport protein                  |
| ACD59145 | 0           | 0           | 0            | histidine kinase                                             |
| ACD58022 | 0           | 0           | 0            | ISXoo13 transposase                                          |
| ACD59637 | 0           | 4.517483578 | 7.504985787  | ISXoo13 transposase                                          |
| ACD59103 | 0           | 0           | 0            | ISXoo13 transposase                                          |
| ACD60003 | 0           | 0           | 0            | ISXoo13 transposase                                          |
| ACD60526 | 4.156064869 | 4.885745174 | 4.215476698  | ISXoo13 transposase                                          |
| ACD59063 | 0           | 0           | 0            | hydrolase, carbon-nitrogen family                            |
| ACD59077 | 0           | 0           | 0            | oxidoreductase                                               |
| ACD58451 | 0           | 0           | 0            | conserved domain protein                                     |
| ACD59160 | 0           | 0           | 0            | flagellar hook-associated protein 3                          |
| ACD59107 | 0           | 0           | 0            | molybdopterin biosynthesis                                   |
| ACD59439 | 0           | 0           | 0            | homoserine O-acetyltransferase                               |
| ACD59149 | 0           | 0           | 0            | chemotaxis protein                                           |
| ACD59140 | 0           | 0           | 0            | conserved hypothetical protein                               |
| ACD58871 | 3.433627167 | 0           | 0            | ISXoo11 transposase                                          |
| ACD59480 | 0           | 0           | 0            | ISXoo11 transposase                                          |
| ACD61459 | 0           | 0           | 0            | ISXoo11 transposase                                          |
| ACD59097 | 0           | 0           | 0            | transposase                                                  |
| ACD59171 | 0           | 0           | 0            | acyl carrier protein                                         |
| ACD59147 | 0           | 0           | 0            | flagellar protein                                            |
| ACD59072 | 0           | 0           | 0            | C-type cytochrome biogenesis protein                         |
| ACD59084 | 0           | 0           | 0            | 2,3-diketo-5-methylthio-1-phosphopentane phosphatase         |
| ACD59134 | 0           | 0           | 0            | ATP-dependent Clp protease ATP-binding subunit ClpA          |
| ACD59079 | 0           | 0           | 0            | hydrolase, nudix family protein                              |
| ACD59135 | 0           | 0           | 0            | ATP-dependent Clp protease adaptor protein ClpS              |
| ACD59198 | 0           | 0           | 0            | Putative signal protein with GGDEF and EAL domains           |
| ACD59120 | 0           | 0           | 0            | putative Protein CrcB homolog                                |
| ACD59178 | 0           | 0           | 0            | methyltransferase, FkbM family protein                       |
| ACD59194 | 0           | 0           | 0            | flagellar biosynthetic protein FliR                          |
| ACD59217 | 0           | 0           | 0            | glutamate synthase domain 2                                  |
| ACD59136 | 0           | 0           | 0            | 7,8-dihydro-8-oxoguanine-triphosphatase                      |
| ACD59431 | 0           | 0           | 0            | ISXoo3 transposase ORF B                                     |
| ACD61273 | 0           | 0           | -0.120159379 | ISXoo3 transposase ORF B                                     |
| ACD58447 | 0           | 0           | 0            | probable vgr-related protein                                 |
| ACD59215 | 0           | 0           | 0            | hypothetical protein                                         |
| ACD61431 | 0           | 0           | 0            | transposase                                                  |
| ACD59163 | 0           | 0           | 11.59386261  | flagellar protein FliS                                       |
| ACD59109 | 0           | 0           | 0            | serine/threonine protein kinase                              |
| ACD59093 | 0           | 0           | 0            | conserved domain protein                                     |
| ACD59100 | 0           | 0           | 0            | transposase                                                  |
| ACD59213 | 0           | 0           | 0            | Rhs family protein                                           |

**Supplementary Table 5.** Gene ontology analysis of enriched up-regulated genes of Xoo during in planta growth on [susceptible (S) and resistant (R)] hosts

| <b>Dongjin (susceptible)</b>             |             |       |      |                                                                                     |
|------------------------------------------|-------------|-------|------|-------------------------------------------------------------------------------------|
| <b>Biological process (Dongjin 2UP)</b>  |             |       |      |                                                                                     |
| GOBPID                                   | Pvalue      | Count | Size | Term                                                                                |
| GO:0044699                               | 0.049822672 | 111   | 854  | single-organism process                                                             |
| GO:0044763                               | 0.024923796 | 92    | 675  | single-organism cellular process                                                    |
| GO:0055085                               | 0.003805717 | 20    | 93   | transmembrane transport                                                             |
| GO:0006811                               | 0.018376485 | 12    | 54   | ion transport                                                                       |
| GO:0022900                               | 0.001861278 | 7     | 17   | electron transport chain                                                            |
| GO:0006091                               | 0.002748574 | 7     | 18   | generation of precursor metabolites and energy                                      |
| GO:0022904                               | 0.003156084 | 6     | 14   | respiratory electron transport chain                                                |
| GO:0015980                               | 0.0068811   | 6     | 16   | energy derivation by oxidation of organic compounds                                 |
| GO:0045333                               | 0.0068811   | 6     | 16   | cellular respiration                                                                |
| GO:0042773                               | 0.008651732 | 4     | 8    | ATP synthesis coupled electron transport                                            |
| GO:0006119                               | 0.008651732 | 4     | 8    | oxidative phosphorylation                                                           |
| GO:0000105                               | 0.013586307 | 2     | 2    | histidine biosynthetic process                                                      |
| GO:0052803                               | 0.013586307 | 2     | 2    | imidazole-containing compound metabolic process                                     |
| GO:0006547                               | 0.013586307 | 2     | 2    | histidine metabolic process                                                         |
| <b>Molecular function (Dongjin 2UP)</b>  |             |       |      |                                                                                     |
| GO:0005215                               | 0.043896526 | 32    | 203  | transporter activity                                                                |
| GO:0043169                               | 0.001315858 | 23    | 103  | cation binding                                                                      |
| GO:0022857                               | 0.006700711 | 19    | 90   | transmembrane transporter activity                                                  |
| GO:0046872                               | 0.012152936 | 19    | 95   | metal ion binding                                                                   |
| GO:0022892                               | 0.042652682 | 16    | 87   | substrate-specific transporter activity                                             |
| GO:0046914                               | 0.018261914 | 14    | 66   | transition metal ion binding                                                        |
| GO:0022891                               | 0.026391758 | 14    | 69   | substrate-specific transmembrane transporter activity                               |
| GO:0015075                               | 0.01444729  | 13    | 58   | ion transmembrane transporter activity                                              |
| GO:0016746                               | 0.027794462 | 10    | 44   | transferase activity, transferring acyl groups                                      |
| GO:0016747                               | 0.023089679 | 8     | 31   | transferase activity, transferring acyl groups other than amino-acyl groups         |
| GO:0022890                               | 0.045581024 | 8     | 35   | inorganic cation transmembrane transporter activity                                 |
| GO:0008080                               | 0.002904536 | 7     | 18   | N-acetyltransferase activity                                                        |
| GO:0016410                               | 0.002904536 | 7     | 18   | N-acyltransferase activity                                                          |
| GO:0016407                               | 0.002904536 | 7     | 18   | acetyltransferase activity                                                          |
| GO:0015077                               | 0.00777801  | 7     | 21   | monovalent inorganic cation transmembrane transporter activity                      |
| GO:0009055                               | 0.016999046 | 7     | 24   | electron carrier activity                                                           |
| GO:0015078                               | 0.01005246  | 6     | 17   | hydrogen ion transmembrane transporter activity                                     |
| GO:0016651                               | 0.031764142 | 5     | 16   | oxidoreductase activity, acting on NAD(P)H                                          |
| GO:0046906                               | 0.022124728 | 4     | 10   | tetrapyrrole binding                                                                |
| GO:0020037                               | 0.022124728 | 4     | 10   | heme binding                                                                        |
| GO:0003954                               | 0.031622083 | 4     | 11   | NADH dehydrogenase activity                                                         |
| GO:0008137                               | 0.031622083 | 4     | 11   | NADH dehydrogenase (ubiquinone) activity                                            |
| GO:0016655                               | 0.031622083 | 4     | 11   | oxidoreductase activity, acting on NAD(P)H, quinone or similar compound as acceptor |
| GO:0050136                               | 0.031622083 | 4     | 11   | NADH dehydrogenase (quinone) activity                                               |
| GO:0004129                               | 0.03820029  | 2     | 3    | cytochrome-c oxidase activity                                                       |
| GO:0016675                               | 0.03820029  | 2     | 3    | oxidoreductase activity, acting on a heme group of donors                           |
| GO:0016676                               | 0.03820029  | 2     | 3    | oxidoreductase activity, acting on a heme group of donors, oxygen as acceptor       |
| <b>Samgwang (resistant)</b>              |             |       |      |                                                                                     |
| <b>Biological process (Samgwang 2UP)</b> |             |       |      |                                                                                     |
| GO:0005975                               | 0.010648185 | 19    | 79   | carbohydrate metabolic process                                                      |
| GO:0022900                               | 0.005608886 | 7     | 17   | electron transport chain                                                            |
| GO:0006091                               | 0.008095887 | 7     | 18   | generation of precursor metabolites and energy                                      |
| GO:0022904                               | 0.008246657 | 6     | 14   | respiratory electron transport chain                                                |
| GO:0015980                               | 0.017199638 | 6     | 16   | energy derivation by oxidation of organic compounds                                 |
| GO:0045333                               | 0.017199638 | 6     | 16   | cellular respiration                                                                |

|                                          |             |    |     |                                                                                     |
|------------------------------------------|-------------|----|-----|-------------------------------------------------------------------------------------|
| GO:0042773                               | 0.016969694 | 4  | 8   | ATP synthesis coupled electron transport                                            |
| GO:0006119                               | 0.016969694 | 4  | 8   | oxidative phosphorylation                                                           |
| <b>Molecular function (Samgwang 2UP)</b> |             |    |     |                                                                                     |
| GO:0043169                               | 0.000364365 | 27 | 103 | cation binding                                                                      |
| GO:0046872                               | 0.014211064 | 21 | 95  | metal ion binding                                                                   |
| GO:0046914                               | 0.028357657 | 15 | 66  | transition metal ion binding                                                        |
| GO:0015077                               | 0.017314143 | 7  | 21  | monovalent inorganic cation transmembrane transporter activity                      |
| GO:0009055                               | 0.035938369 | 7  | 24  | electron carrier activity                                                           |
| GO:0015078                               | 0.020375979 | 6  | 17  | hydrogen ion transmembrane transporter activity                                     |
| GO:0003954                               | 0.0104944   | 5  | 11  | NADH dehydrogenase activity                                                         |
| GO:0008137                               | 0.0104944   | 5  | 11  | NADH dehydrogenase (ubiquinone) activity                                            |
| GO:0016655                               | 0.0104944   | 5  | 11  | oxidoreductase activity, acting on NAD(P)H, quinone or similar compound as acceptor |
| GO:0050136                               | 0.0104944   | 5  | 11  | NADH dehydrogenase (quinone) activity                                               |
| GO:0046906                               | 0.036466265 | 4  | 10  | tetrapyrrole binding                                                                |
| GO:0020037                               | 0.036466265 | 4  | 10  | heme binding                                                                        |
| GO:0046983                               | 0.036711569 | 3  | 6   | protein dimerization activity                                                       |





**Supplementary Table 6.** Enriched KEGG pathways of up-regulated Xoo genes during in planta growth on [susceptible (S) and resistant (R)] hosts.

| Dongjin (susceptible) |                                                     |             |              |
|-----------------------|-----------------------------------------------------|-------------|--------------|
| Kegg Pathway          | Description                                         | Gene number | (%) of genes |
| 01100                 | Metabolic pathways                                  | 60          | 19.67213115  |
| 01110                 | Biosynthesis of secondary metabolites               | 25          | 8.196721311  |
| 01130                 | Biosynthesis of antibiotics                         | 16          | 5.245901639  |
| 00190                 | Oxidative phosphorylation                           | 13          | 4.262295082  |
| 02020                 | Two-component system                                | 11          | 3.606557377  |
| 01230                 | Biosynthesis of amino acids                         | 9           | 2.950819672  |
| 00500                 | Starch and sucrose metabolism                       | 8           | 2.62295082   |
| 00230                 | Purine metabolism                                   | 7           | 2.295081967  |
| 01120                 | Microbial metabolism in diverse environments        | 6           | 1.967213115  |
| 03070                 | Bacterial secretion system                          | 6           | 1.967213115  |
| 00564                 | Glycerophospholipid metabolism                      | 5           | 1.639344262  |
| 01502                 | Vancomycin resistance                               | 4           | 1.31147541   |
| 00920                 | Sulfur metabolism                                   | 4           | 1.31147541   |
| 00550                 | Peptidoglycan biosynthesis                          | 4           | 1.31147541   |
| 00270                 | Cysteine and methionine metabolism                  | 4           | 1.31147541   |
| 04112                 | Cell cycle - Caulobacter                            | 4           | 1.31147541   |
| 01503                 | Cationic antimicrobial peptide (CAMP) resistance    | 4           | 1.31147541   |
| 00330                 | Arginine and proline metabolism                     | 4           | 1.31147541   |
| 05014                 | Amyotrophic lateral sclerosis (ALS)                 | 4           | 1.31147541   |
| 02010                 | ABC transporters                                    | 4           | 1.31147541   |
| 00900                 | Terpenoid backbone biosynthesis                     | 3           | 0.983606557  |
| 04146                 | Peroxisome                                          | 3           | 0.983606557  |
| 00511                 | Other glycan degradation                            | 3           | 0.983606557  |
| 03430                 | Mismatch repair                                     | 3           | 0.983606557  |
| 00540                 | Lipopolysaccharide biosynthesis                     | 3           | 0.983606557  |
| 03440                 | Homologous recombination                            | 3           | 0.983606557  |
| 00630                 | Glyoxylate and dicarboxylate metabolism             | 3           | 0.983606557  |
| 04260                 | Cardiac muscle contraction                          | 3           | 0.983606557  |
| 01200                 | Carbon metabolism                                   | 3           | 0.983606557  |
| 03018                 | RNA degradation                                     | 2           | 0.655737705  |
| 03008                 | Ribosome biogenesis in eukaryotes                   | 2           | 0.655737705  |
| 00740                 | Riboflavin metabolism                               | 2           | 0.655737705  |
| 00860                 | Porphyrin and chlorophyll metabolism                | 2           | 0.655737705  |
| 00360                 | Phenylalanine metabolism                            | 2           | 0.655737705  |
| 03420                 | Nucleotide excision repair                          | 2           | 0.655737705  |
| 00340                 | Histidine metabolism                                | 2           | 0.655737705  |
| 04068                 | FoxO signaling pathway                              | 2           | 0.655737705  |
| 00790                 | Folate biosynthesis                                 | 2           | 0.655737705  |
| 03030                 | DNA replication                                     | 2           | 0.655737705  |
| 05204                 | Chemical carcinogenesis                             | 2           | 0.655737705  |
| 00650                 | Butanoate metabolism                                | 2           | 0.655737705  |
| 01501                 | beta-Lactam resistance                              | 2           | 0.655737705  |
| 03410                 | Base excision repair                                | 2           | 0.655737705  |
| 00520                 | Amino sugar and nucleotide sugar metabolism         | 2           | 0.655737705  |
| 01210                 | 2-Oxocarboxylic acid metabolism                     | 2           | 0.655737705  |
| 05111                 | Vibrio cholerae pathogenic cycle                    | 1           | 0.327868852  |
| 00280                 | Valine, leucine and isoleucine degradation          | 1           | 0.327868852  |
| 00130                 | Ubiquinone and other terpenoid-quinone biosynthesis | 1           | 0.327868852  |
| 00380                 | Tryptophan metabolism                               | 1           | 0.327868852  |
| 00623                 | Toluene degradation                                 | 1           | 0.327868852  |

|       |                                                     |   |             |
|-------|-----------------------------------------------------|---|-------------|
| 00072 | Synthesis and degradation of ketone bodies          | 1 | 0.327868852 |
| 04122 | Sulfur relay system                                 | 1 | 0.327868852 |
| 00600 | Sphingolipid metabolism                             | 1 | 0.327868852 |
| 00450 | Selenocompound metabolism                           | 1 | 0.327868852 |
| 03010 | Ribosome                                            | 1 | 0.327868852 |
| 05211 | Renal cell carcinoma                                | 1 | 0.327868852 |
| 00240 | Pyrimidine metabolism                               | 1 | 0.327868852 |
| 00640 | Propanoate metabolism                               | 1 | 0.327868852 |
| 05340 | Primary immunodeficiency                            | 1 | 0.327868852 |
| 03320 | PPAR signaling pathway                              | 1 | 0.327868852 |
| 00195 | Photosynthesis                                      | 1 | 0.327868852 |
| 00440 | Phosphonate and phosphinate metabolism              | 1 | 0.327868852 |
| 00940 | Phenylpropanoid biosynthesis                        | 1 | 0.327868852 |
| 00400 | Phenylalanine, tyrosine and tryptophan biosynthesis | 1 | 0.327868852 |
| 00030 | Pentose phosphate pathway                           | 1 | 0.327868852 |
| 05200 | Pathways in cancer                                  | 1 | 0.327868852 |
| 00910 | Nitrogen metabolism                                 | 1 | 0.327868852 |
| 00760 | Nicotinate and nicotinamide metabolism              | 1 | 0.327868852 |
| 00260 | Glycine, serine and threonine metabolism            | 1 | 0.327868852 |
| 00561 | Glycerolipid metabolism                             | 1 | 0.327868852 |
| 04724 | Glutamatergic synapse                               | 1 | 0.327868852 |
| 00052 | Galactose metabolism                                | 1 | 0.327868852 |
| 04727 | GABAergic synapse                                   | 1 | 0.327868852 |
| 00051 | Fructose and mannose metabolism                     | 1 | 0.327868852 |
| 00364 | Fluorobenzoate degradation                          | 1 | 0.327868852 |
| 01212 | Fatty acid metabolism                               | 1 | 0.327868852 |
| 00983 | Drug metabolism - other enzymes                     | 1 | 0.327868852 |
| 00471 | D-Glutamine and D-glutamate metabolism              | 1 | 0.327868852 |
| 01220 | Degradation of aromatic compounds                   | 1 | 0.327868852 |
| 00473 | D-Alanine metabolism                                | 1 | 0.327868852 |
| 00460 | Cyanoamino acid metabolism                          | 1 | 0.327868852 |
| 00361 | Chlorocyclohexane and chlorobenzene degradation     | 1 | 0.327868852 |
| 00332 | Carbapenem biosynthesis                             | 1 | 0.327868852 |
| 00930 | Caprolactam degradation                             | 1 | 0.327868852 |
| 01040 | Biosynthesis of unsaturated fatty acids             | 1 | 0.327868852 |
| 02030 | Bacterial chemotaxis                                | 1 | 0.327868852 |
| 00053 | Ascorbate and aldarate metabolism                   | 1 | 0.327868852 |
| 04152 | AMPK signaling pathway                              | 1 | 0.327868852 |
| 00250 | Alanine, aspartate and glutamate metabolism         | 1 | 0.327868852 |

| <b>Samgwang (resistant)</b> |                                              |    |             |
|-----------------------------|----------------------------------------------|----|-------------|
| 01100                       | Metabolic pathways                           | 70 | 17.76649746 |
| 01110                       | Biosynthesis of secondary metabolites        | 31 | 7.868020305 |
| 02020                       | Two-component system                         | 19 | 4.822335025 |
| 01130                       | Biosynthesis of antibiotics                  | 18 | 4.568527919 |
| 01120                       | Microbial metabolism in diverse environments | 14 | 3.553299492 |
| 00190                       | Oxidative phosphorylation                    | 11 | 2.791878173 |
| 03070                       | Bacterial secretion system                   | 11 | 2.791878173 |
| 00500                       | Starch and sucrose metabolism                | 10 | 2.538071066 |
| 01200                       | Carbon metabolism                            | 9  | 2.284263959 |
| 01230                       | Biosynthesis of amino acids                  | 9  | 2.284263959 |
| 02010                       | ABC transporters                             | 6  | 1.52284264  |
| 05016                       | Huntington's disease                         | 5  | 1.269035533 |
| 00630                       | Glyoxylate and dicarboxylate metabolism      | 5  | 1.269035533 |
| 00920                       | Sulfur metabolism                            | 4  | 1.015228426 |

|       |                                                     |   |             |
|-------|-----------------------------------------------------|---|-------------|
| 00230 | Purine metabolism                                   | 4 | 1.015228426 |
| 04146 | Peroxisome                                          | 4 | 1.015228426 |
| 00550 | Peptidoglycan biosynthesis                          | 4 | 1.015228426 |
| 00564 | Glycerophospholipid metabolism                      | 4 | 1.015228426 |
| 01212 | Fatty acid metabolism                               | 4 | 1.015228426 |
| 00270 | Cysteine and methionine metabolism                  | 4 | 1.015228426 |
| 04112 | Cell cycle - Caulobacter                            | 4 | 1.015228426 |
| 02030 | Bacterial chemotaxis                                | 4 | 1.015228426 |
| 00900 | Terpenoid backbone biosynthesis                     | 3 | 0.76142132  |
| 03018 | RNA degradation                                     | 3 | 0.76142132  |
| 00740 | Riboflavin metabolism                               | 3 | 0.76142132  |
| 00640 | Propanoate metabolism                               | 3 | 0.76142132  |
| 05012 | Parkinson's disease                                 | 3 | 0.76142132  |
| 04932 | Non-alcoholic fatty liver disease (NAFLD)           | 3 | 0.76142132  |
| 00540 | Lipopolysaccharide biosynthesis                     | 3 | 0.76142132  |
| 00790 | Folate biosynthesis                                 | 3 | 0.76142132  |
| 00061 | Fatty acid biosynthesis                             | 3 | 0.76142132  |
| 04260 | Cardiac muscle contraction                          | 3 | 0.76142132  |
| 00720 | Carbon fixation pathways in prokaryotes             | 3 | 0.76142132  |
| 00650 | Butanoate metabolism                                | 3 | 0.76142132  |
| 00053 | Ascorbate and aldarate metabolism                   | 3 | 0.76142132  |
| 00330 | Arginine and proline metabolism                     | 3 | 0.76142132  |
| 05010 | Alzheimer's disease                                 | 3 | 0.76142132  |
| 01502 | Vancomycin resistance                               | 2 | 0.507614213 |
| 00280 | Valine, leucine and isoleucine degradation          | 2 | 0.507614213 |
| 03008 | Ribosome biogenesis in eukaryotes                   | 2 | 0.507614213 |
| 00620 | Pyruvate metabolism                                 | 2 | 0.507614213 |
| 03060 | Protein export                                      | 2 | 0.507614213 |
| 03320 | PPAR signaling pathway                              | 2 | 0.507614213 |
| 00860 | Porphyrin and chlorophyll metabolism                | 2 | 0.507614213 |
| 00400 | Phenylalanine, tyrosine and tryptophan biosynthesis | 2 | 0.507614213 |
| 00511 | Other glycan degradation                            | 2 | 0.507614213 |
| 00760 | Nicotinate and nicotinamide metabolism              | 2 | 0.507614213 |
| 00300 | Lysine biosynthesis                                 | 2 | 0.507614213 |
| 00340 | Histidine metabolism                                | 2 | 0.507614213 |
| 00010 | Glycolysis / Gluconeogenesis                        | 2 | 0.507614213 |
| 00051 | Fructose and mannose metabolism                     | 2 | 0.507614213 |
| 04068 | FoxO signaling pathway                              | 2 | 0.507614213 |
| 01503 | Cationic antimicrobial peptide (CAMP) resistance    | 2 | 0.507614213 |
| 00780 | Biotin metabolism                                   | 2 | 0.507614213 |
| 01040 | Biosynthesis of unsaturated fatty acids             | 2 | 0.507614213 |
| 03410 | Base excision repair                                | 2 | 0.507614213 |
| 05014 | Amyotrophic lateral sclerosis (ALS)                 | 2 | 0.507614213 |
| 00520 | Amino sugar and nucleotide sugar metabolism         | 2 | 0.507614213 |
| 01210 | 2-Oxocarboxylic acid metabolism                     | 2 | 0.507614213 |
| 00750 | Vitamin B6 metabolism                               | 1 | 0.253807107 |
| 05111 | Vibrio cholerae pathogenic cycle                    | 1 | 0.253807107 |
| 00290 | Valine, leucine and isoleucine biosynthesis         | 1 | 0.253807107 |
| 00130 | Ubiquinone and other terpenoid-quinone biosynthesis | 1 | 0.253807107 |
| 00350 | Tyrosine metabolism                                 | 1 | 0.253807107 |
| 00380 | Tryptophan metabolism                               | 1 | 0.253807107 |
| 00253 | Tetracycline biosynthesis                           | 1 | 0.253807107 |
| 00072 | Synthesis and degradation of ketone bodies          | 1 | 0.253807107 |
| 04122 | Sulfur relay system                                 | 1 | 0.253807107 |
| 00521 | Streptomycin biosynthesis                           | 1 | 0.253807107 |

|       |                                             |   |             |
|-------|---------------------------------------------|---|-------------|
| 00450 | Selenocompound metabolism                   | 1 | 0.253807107 |
| 03010 | Ribosome                                    | 1 | 0.253807107 |
| 05211 | Renal cell carcinoma                        | 1 | 0.253807107 |
| 05205 | Proteoglycans in cancer                     | 1 | 0.253807107 |
| 05020 | Prion diseases                              | 1 | 0.253807107 |
| 05340 | Primary immunodeficiency                    | 1 | 0.253807107 |
| 00195 | Photosynthesis                              | 1 | 0.253807107 |
| 02060 | Phosphotransferase system (PTS)             | 1 | 0.253807107 |
| 00940 | Phenylpropanoid biosynthesis                | 1 | 0.253807107 |
| 00360 | Phenylalanine metabolism                    | 1 | 0.253807107 |
| 00030 | Pentose phosphate pathway                   | 1 | 0.253807107 |
| 05200 | Pathways in cancer                          | 1 | 0.253807107 |
| 00770 | Pantothenate and CoA biosynthesis           | 1 | 0.253807107 |
| 03420 | Nucleotide excision repair                  | 1 | 0.253807107 |
| 00910 | Nitrogen metabolism                         | 1 | 0.253807107 |
| 03430 | Mismatch repair                             | 1 | 0.253807107 |
| 00680 | Methane metabolism                          | 1 | 0.253807107 |
| 00562 | Inositol phosphate metabolism               | 1 | 0.253807107 |
| 03440 | Homologous recombination                    | 1 | 0.253807107 |
| 00260 | Glycine, serine and threonine metabolism    | 1 | 0.253807107 |
| 00561 | Glycerolipid metabolism                     | 1 | 0.253807107 |
| 04724 | Glutamatergic synapse                       | 1 | 0.253807107 |
| 00052 | Galactose metabolism                        | 1 | 0.253807107 |
| 04727 | GABAergic synapse                           | 1 | 0.253807107 |
| 00071 | Fatty acid degradation                      | 1 | 0.253807107 |
| 00983 | Drug metabolism - other enzymes             | 1 | 0.253807107 |
| 03030 | DNA replication                             | 1 | 0.253807107 |
| 00471 | D-Glutamine and D-glutamate metabolism      | 1 | 0.253807107 |
| 01220 | Degradation of aromatic compounds           | 1 | 0.253807107 |
| 00460 | Cyanoamino acid metabolism                  | 1 | 0.253807107 |
| 00020 | Citrate cycle (TCA cycle)                   | 1 | 0.253807107 |
| 05204 | Chemical carcinogenesis                     | 1 | 0.253807107 |
| 00710 | Carbon fixation in photosynthetic organisms | 1 | 0.253807107 |
| 00332 | Carbapenem biosynthesis                     | 1 | 0.253807107 |
| 00930 | Caprolactam degradation                     | 1 | 0.253807107 |
| 00660 | C5-Branched dibasic acid metabolism         | 1 | 0.253807107 |
| 00524 | Butirosin and neomycin biosynthesis         | 1 | 0.253807107 |
| 01501 | beta-Lactam resistance                      | 1 | 0.253807107 |
| 04152 | AMPK signaling pathway                      | 1 | 0.253807107 |
| 00250 | Alanine, aspartate and glutamate metabolism | 1 | 0.253807107 |
| 04920 | Adipocytokine signaling pathway             | 1 | 0.253807107 |



**Supplementary Table 7.** Analysis of putative secretory proteins

| # name                     | Signal P |     |       |     |       |     |       |       |   |         | Networks-used |
|----------------------------|----------|-----|-------|-----|-------|-----|-------|-------|---|---------|---------------|
|                            | Cmax     | pos | Ymax  | pos | Smax  | pos | Smean | D     | ? | Dmaxcut |               |
| gi_188518723.gb_ACD56668.1 | 0.108    | 23  | 0.103 | 57  | 0.122 | 45  | 0.084 | 0.094 | N | 0.57    | SignalP-noTM  |
| gi_188518724.gb_ACD56669.1 | 0.167    | 32  | 0.149 | 32  | 0.228 | 1   | 0.153 | 0.151 | N | 0.57    | SignalP-noTM  |
| gi_188518725.gb_ACD56670.1 | 0.128    | 32  | 0.174 | 15  | 0.391 | 11  | 0.302 | 0.234 | N | 0.57    | SignalP-noTM  |
| gi_188518726.gb_ACD56671.1 | 0.104    | 67  | 0.125 | 12  | 0.184 | 6   | 0.161 | 0.142 | N | 0.57    | SignalP-noTM  |
| gi_188518727.gb_ACD56672.1 | 0.134    | 50  | 0.114 | 13  | 0.117 | 10  | 0.135 | 0.122 | N | 0.51    | SignalP-TM    |
| gi_188518728.gb_ACD56673.1 | 0.26     | 19  | 0.492 | 19  | 0.961 | 10  | 0.936 | 0.701 | Y | 0.57    | SignalP-noTM  |
| gi_188518729.gb_ACD56674.1 | 0.219    | 30  | 0.356 | 23  | 0.946 | 15  | 0.903 | 0.613 | Y | 0.57    | SignalP-noTM  |
| gi_188518730.gb_ACD56675.1 | 0.106    | 14  | 0.138 | 14  | 0.266 | 7   | 0.176 | 0.156 | N | 0.57    | SignalP-noTM  |
| gi_188518731.gb_ACD56676.1 | 0.171    | 20  | 0.211 | 20  | 0.443 | 1   | 0.311 | 0.248 | N | 0.51    | SignalP-TM    |
| gi_188518732.gb_ACD56677.1 | 0.122    | 25  | 0.123 | 31  | 0.207 | 23  | 0.109 | 0.118 | N | 0.51    | SignalP-TM    |
| gi_188518733.gb_ACD56678.1 | 0.198    | 25  | 0.135 | 33  | 0.209 | 1   | 0.121 | 0.13  | N | 0.51    | SignalP-TM    |
| gi_188518739.gb_ACD56684.1 | 0.834    | 25  | 0.844 | 25  | 0.958 | 8   | 0.883 | 0.862 | Y | 0.57    | SignalP-noTM  |
| gi_188518740.gb_ACD56685.1 | 0.206    | 49  | 0.19  | 49  | 0.33  | 39  | 0.118 | 0.156 | N | 0.57    | SignalP-noTM  |
| gi_188518747.gb_ACD56692.1 | 0.12     | 57  | 0.141 | 11  | 0.28  | 1   | 0.184 | 0.161 | N | 0.57    | SignalP-noTM  |
| gi_188518751.gb_ACD56696.1 | 0.196    | 20  | 0.282 | 20  | 0.617 | 10  | 0.407 | 0.341 | N | 0.57    | SignalP-noTM  |
| gi_188518757.gb_ACD56702.1 | 0.13     | 25  | 0.144 | 18  | 0.221 | 9   | 0.162 | 0.152 | N | 0.57    | SignalP-noTM  |
| gi_188518765.gb_ACD56710.1 | 0.31     | 25  | 0.128 | 25  | 0.202 | 37  | 0.118 | 0.124 | N | 0.51    | SignalP-TM    |
| gi_188518766.gb_ACD56711.1 | 0.335    | 21  | 0.112 | 11  | 0.206 | 2   | 0.116 | 0.114 | N | 0.57    | SignalP-noTM  |
| gi_188518767.gb_ACD56712.1 | 0.229    | 17  | 0.269 | 17  | 0.485 | 13  | 0.315 | 0.29  | N | 0.57    | SignalP-noTM  |
| gi_188518768.gb_ACD56713.1 | 0.142    | 40  | 0.115 | 40  | 0.128 | 36  | 0.089 | 0.103 | N | 0.57    | SignalP-noTM  |
| gi_188518771.gb_ACD56716.1 | 0.107    | 42  | 0.118 | 18  | 0.156 | 13  | 0.122 | 0.12  | N | 0.57    | SignalP-noTM  |
| gi_188518772.gb_ACD56717.1 | 0.148    | 49  | 0.12  | 11  | 0.231 | 1   | 0.133 | 0.126 | N | 0.57    | SignalP-noTM  |
| gi_188518773.gb_ACD56718.1 | 0.203    | 19  | 0.407 | 19  | 0.934 | 1   | 0.837 | 0.609 | Y | 0.57    | SignalP-noTM  |
| gi_188518775.gb_ACD56720.1 | 0.152    | 17  | 0.103 | 17  | 0.151 | 6   | 0.069 | 0.087 | N | 0.57    | SignalP-noTM  |
| gi_188518776.gb_ACD56721.1 | 0.121    | 68  | 0.16  | 18  | 0.308 | 9   | 0.245 | 0.2   | N | 0.57    | SignalP-noTM  |
| gi_188518779.gb_ACD56724.1 | 0.34     | 21  | 0.471 | 21  | 0.823 | 2   | 0.709 | 0.559 | Y | 0.51    | SignalP-TM    |
| gi_188518780.gb_ACD56725.1 | 0.158    | 38  | 0.114 | 11  | 0.169 | 3   | 0.133 | 0.123 | N | 0.57    | SignalP-noTM  |
| gi_188518781.gb_ACD56726.1 | 0.223    | 19  | 0.107 | 42  | 0.131 | 41  | 0.065 | 0.087 | N | 0.57    | SignalP-noTM  |
| gi_188518782.gb_ACD56727.1 | 0.127    | 33  | 0.144 | 16  | 0.247 | 5   | 0.211 | 0.169 | N | 0.51    | SignalP-TM    |
| gi_188518787.gb_ACD56732.1 | 0.105    | 21  | 0.138 | 13  | 0.25  | 9   | 0.186 | 0.161 | N | 0.57    | SignalP-noTM  |
| gi_188518788.gb_ACD56733.1 | 0.129    | 25  | 0.109 | 25  | 0.137 | 14  | 0.098 | 0.104 | N | 0.57    | SignalP-noTM  |
| gi_188518789.gb_ACD56734.1 | 0.31     | 29  | 0.181 | 29  | 0.346 | 19  | 0.227 | 0.198 | N | 0.51    | SignalP-TM    |
| gi_188518790.gb_ACD56735.1 | 0.172    | 28  | 0.144 | 28  | 0.265 | 25  | 0.132 | 0.138 | N | 0.57    | SignalP-noTM  |
| gi_188518799.gb_ACD56744.1 | 0.114    | 25  | 0.152 | 25  | 0.352 | 13  | 0.193 | 0.171 | N | 0.57    | SignalP-noTM  |
| gi_188518802.gb_ACD56747.1 | 0.151    | 37  | 0.123 | 37  | 0.167 | 35  | 0.092 | 0.108 | N | 0.57    | SignalP-noTM  |
| gi_188518803.gb_ACD56748.1 | 0.178    | 31  | 0.289 | 17  | 0.78  | 8   | 0.633 | 0.451 | N | 0.57    | SignalP-noTM  |
| gi_188518804.gb_ACD56749.1 | 0.28     | 18  | 0.444 | 18  | 0.831 | 12  | 0.666 | 0.549 | N | 0.57    | SignalP-noTM  |
| gi_188518805.gb_ACD56750.1 | 0.136    | 27  | 0.116 | 27  | 0.187 | 21  | 0.096 | 0.108 | N | 0.51    | SignalP-TM    |
| gi_188518806.gb_ACD56751.1 | 0.267    | 26  | 0.175 | 26  | 0.162 | 31  | 0.108 | 0.143 | N | 0.57    | SignalP-noTM  |
| gi_188518807.gb_ACD56752.1 | 0.11     | 23  | 0.117 | 47  | 0.157 | 43  | 0.109 | 0.113 | N | 0.57    | SignalP-noTM  |
| gi_188518808.gb_ACD56753.1 | 0.101    | 22  | 0.12  | 11  | 0.188 | 2   | 0.147 | 0.132 | N | 0.57    | SignalP-noTM  |
| gi_188518810.gb_ACD56755.1 | 0.563    | 41  | 0.345 | 41  | 0.342 | 37  | 0.146 | 0.271 | N | 0.51    | SignalP-TM    |
| gi_188518811.gb_ACD56756.1 | 0.852    | 20  | 0.823 | 20  | 0.925 | 13  | 0.813 | 0.819 | Y | 0.57    | SignalP-noTM  |
| gi_188518814.gb_ACD56759.1 | 0.123    | 52  | 0.122 | 52  | 0.139 | 44  | 0.101 | 0.112 | N | 0.57    | SignalP-noTM  |
| gi_188518816.gb_ACD56761.1 | 0.139    | 35  | 0.115 | 12  | 0.169 | 2   | 0.133 | 0.124 | N | 0.57    | SignalP-noTM  |
| gi_188518822.gb_ACD56767.1 | 0.796    | 17  | 0.741 | 17  | 0.808 | 13  | 0.675 | 0.71  | Y | 0.57    | SignalP-noTM  |
| gi_188518825.gb_ACD56770.1 | 0.111    | 9   | 0.106 | 68  | 0.124 | 62  | 0.09  | 0.098 | N | 0.57    | SignalP-noTM  |
| gi_188518827.gb_ACD56772.1 | 0.121    | 46  | 0.129 | 11  | 0.223 | 1   | 0.16  | 0.143 | N | 0.57    | SignalP-noTM  |
| gi_188518829.gb_ACD56774.1 | 0.149    | 24  | 0.119 | 13  | 0.189 | 11  | 0.125 | 0.122 | N | 0.57    | SignalP-noTM  |
| gi_188518832.gb_ACD56777.1 | 0.117    | 44  | 0.105 | 30  | 0.134 | 6   | 0.106 | 0.106 | N | 0.57    | SignalP-noTM  |
| gi_188518833.gb_ACD56778.1 | 0.213    | 18  | 0.137 | 18  | 0.115 | 1   | 0.092 | 0.116 | N | 0.57    | SignalP-noTM  |
| gi_188518834.gb_ACD56779.1 | 0.111    | 37  | 0.106 | 43  | 0.138 | 41  | 0.092 | 0.099 | N | 0.57    | SignalP-noTM  |
| gi_188518835.gb_ACD56780.1 | 0.221    | 49  | 0.158 | 38  | 0.202 | 31  | 0.103 | 0.132 | N | 0.57    | SignalP-noTM  |
| gi_188518836.gb_ACD56781.1 | 0.226    | 30  | 0.195 | 45  | 0.373 | 42  | 0.187 | 0.192 | N | 0.57    | SignalP-noTM  |
| gi_188518837.gb_ACD56782.1 | 0.104    | 26  | 0.097 | 55  | 0.104 | 45  | 0.075 | 0.087 | N | 0.57    | SignalP-noTM  |
| gi_188518838.gb_ACD56783.1 | 0.131    | 41  | 0.154 | 11  | 0.306 | 2   | 0.237 | 0.193 | N | 0.57    | SignalP-noTM  |
| gi_188518839.gb_ACD56784.1 | 0.112    | 39  | 0.113 | 48  | 0.157 | 47  | 0.092 | 0.103 | N | 0.57    | SignalP-noTM  |
| gi_188518842.gb_ACD56787.1 | 0.164    | 10  | 0.15  | 14  | 0.324 | 9   | 0.218 | 0.182 | N | 0.57    | SignalP-noTM  |
| gi_188518844.gb_ACD56789.1 | 0.112    | 57  | 0.101 | 57  | 0.117 | 1   | 0.093 | 0.098 | N | 0.57    | SignalP-noTM  |
| gi_188518845.gb_ACD56790.1 | 0.158    | 39  | 0.171 | 11  | 0.358 | 1   | 0.291 | 0.227 | N | 0.57    | SignalP-noTM  |
| gi_188518846.gb_ACD56791.1 | 0.202    | 29  | 0.254 | 29  | 0.564 | 25  | 0.216 | 0.236 | N | 0.57    | SignalP-noTM  |
| gi_188518848.gb_ACD56793.1 | 0.307    | 30  | 0.288 | 30  | 0.48  | 20  | 0.26  | 0.275 | N | 0.57    | SignalP-noTM  |
| gi_188518849.gb_ACD56794.1 | 0.781    | 23  | 0.837 | 23  | 0.957 | 15  | 0.912 | 0.872 | Y | 0.57    | SignalP-noTM  |
| gi_188518850.gb_ACD56795.1 | 0.102    | 43  | 0.125 | 11  | 0.253 | 1   | 0.143 | 0.134 | N | 0.57    | SignalP-noTM  |
| gi_188518853.gb_ACD56798.1 | 0.112    | 48  | 0.106 | 35  | 0.129 | 5   | 0.1   | 0.103 | N | 0.57    | SignalP-noTM  |
| gi_188518854.gb_ACD56799.1 | 0.102    | 60  | 0.106 | 14  | 0.151 | 13  | 0.115 | 0.11  | N | 0.57    | SignalP-noTM  |
| gi_188518855.gb_ACD56800.1 | 0.151    | 35  | 0.294 | 27  | 0.887 | 17  | 0.661 | 0.467 | N | 0.57    | SignalP-noTM  |
| gi_188518859.gb_ACD56804.1 | 0.128    | 29  | 0.123 | 29  | 0.141 | 26  | 0.098 | 0.111 | N | 0.57    | SignalP-noTM  |
| gi_188518860.gb_ACD56805.1 | 0.122    | 43  | 0.109 | 43  | 0.129 | 23  | 0.092 | 0.101 | N | 0.57    | SignalP-noTM  |
| gi_188518861.gb_ACD56806.1 | 0.12     | 13  | 0.112 | 33  | 0.155 | 27  | 0.1   | 0.106 | N | 0.57    | SignalP-noTM  |
| gi_188518866.gb_ACD56811.1 | 0.1      | 22  | 0.111 | 12  | 0.148 | 6   | 0.128 | 0.119 | N | 0.57    | SignalP-noTM  |
| gi_188518867.gb_ACD56812.1 | 0.104    | 50  | 0.101 | 68  | 0.123 | 57  | 0.069 | 0.089 | N | 0.51    | SignalP-TM    |

| Secretome P |           |           |            |                            |       | Sequence name |       |       |       |     |                                   |
|-------------|-----------|-----------|------------|----------------------------|-------|---------------|-------|-------|-------|-----|-----------------------------------|
| Network 1   | Network 2 | Network 3 | SecP score |                            |       |               |       |       |       |     |                                   |
| 0.126198    | 0.067926  | 0.13717   | 0.110431   | gi_188518723.gb_ACD56668.1 | 0.682 | 0.645         | 0.859 | 0.723 | 0.684 | YES | gi_188518885.gb_ACD5 length = 100 |
| 0.112346    | 0.328716  | 0.079585  | 0.173549   | gi_188518724.gb_ACD56669.1 | 0.905 | 0.704         | 0.878 | 0.687 | 0.696 | YES | gi_188518895.gb_ACD5 length = 100 |
| 0.140397    | 0.096129  | 0.123901  | 0.120142   | gi_188518725.gb_ACD56670.1 | 0.739 | 0.419         | 0.765 | 0.319 | 0.369 | YES | gi_188519070.gb_ACD5 length = 100 |
| 0.082944    | 0.007994  | 0.103958  | 0.064965   | gi_188518726.gb_ACD56671.1 | 0.511 | 0.541         | 0.878 | 0.547 | 0.544 | YES | gi_188519082.gb_ACD5 length = 100 |
| 0.193879    | 0.265612  | 0.317562  | 0.259018   | gi_188518727.gb_ACD56672.1 | 0.831 | 0.627         | 0.773 | 0.319 | 0.473 | YES | gi_188519122.gb_ACD5 length = 100 |
| 0.942622    | 0.988581  | 0.907711  | 0.946305   | gi_188518728.gb_ACD56673.1 | 0.569 | 0.41          | 0.783 | 0.437 | 0.423 | YES | gi_188519530.gb_ACD5 length = 100 |
| 0.947599    | 0.983127  | 0.899076  | 0.943267   | gi_188518729.gb_ACD56674.1 | 0.616 | 0.6           | 0.834 | 0.657 | 0.629 | YES | gi_188519848.gb_ACD5 length = 100 |
| 0.739043    | 0.979688  | 0.792161  | 0.836964   | gi_188518730.gb_ACD56675.1 | 0.787 | 0.5           | 0.767 | 0.303 | 0.401 | YES | gi_188519911.gb_ACD5 length = 100 |
| 0.1034      | 0.002924  | 0.185126  | 0.09715    | gi_188518731.gb_ACD56676.1 | 0.631 | 0.576         | 0.854 | 0.574 | 0.575 | YES | gi_188520134.gb_ACD5 length = 100 |
| 0.220458    | 0.012742  | 0.239577  | 0.157592   | gi_188518732.gb_ACD56677.1 | 0.875 | 0.685         | 0.829 | 0.419 | 0.552 | YES | gi_188520498.gb_ACD5 length = 100 |
| 0.929367    | 0.994223  | 0.875773  | 0.933121   | gi_188518804.gb_ACD56749.1 | 0.612 | 0.587         | 0.894 | 0.722 | 0.654 | YES | gi_188520615.gb_ACD5 length = 100 |
| 0.193411    | 0.088105  | 0.248431  | 0.176649   | gi_188518805.gb_ACD56750.1 | 0.839 | 0.585         | 0.885 | 0.559 | 0.572 | YES | gi_188520988.gb_ACD5 length = 79  |
| 0.198611    | 0.143687  | 0.26386   | 0.202053   | gi_188518806.gb_ACD56751.1 | 0.596 | 0.465         | 0.752 | 0.374 | 0.42  | YES | gi_188521047.gb_ACD5 length = 48  |
| 0.138955    | 0.450661  | 0.100924  | 0.23018    | gi_188518807.gb_ACD56752.1 | 0.659 | 0.399         | 0.825 | 0.377 | 0.388 | YES | gi_188521495.gb_ACD5 length = 60  |
| 0.231475    | 0.123251  | 0.263278  | 0.260601   | gi_188518808.gb_ACD56753.1 | 0.698 | 0.416         | 0.872 | 0.342 | 0.379 | YES | gi_188521633.gb_ACD5 length = 100 |
| 0.064767    | 0.061399  | 0.194818  | 0.106995   | gi_188518810.gb_ACD56755.1 | 0.761 | 0.431         | 0.889 | 0.645 | 0.538 | YES | gi_188521820.gb_ACD5 length = 100 |
| 0.931502    | 0.995023  | 0.875447  | 0.933991   | gi_188518811.gb_ACD56756.1 | 0.571 | 0.581         | 0.885 | 0.748 | 0.664 | YES | gi_528897485.gb_AGS4 length = 100 |
| 0.165619    | 0.654527  | 0.105647  | 0.308598   | gi_188518814.gb_ACD56759.1 | 0.537 | 0.524         | 0.789 | 0.582 | 0.553 | YES | gi_188521893.gb_ACD5 length = 100 |
| 0.144798    | 0.090052  | 0.349554  | 0.194801   | gi_188518816.gb_ACD56761.1 | 0.813 | 0.715         | 0.823 | 0.651 | 0.683 | YES |                                   |

|              |    |            |       |    |       |    |       |    |       |       |   |      |              |
|--------------|----|------------|-------|----|-------|----|-------|----|-------|-------|---|------|--------------|
| gj_188518869 | gb | ACD56814.1 | 0.109 | 64 | 0.118 | 17 | 0.159 | 10 | 0.132 | 0.124 | N | 0.57 | SignalP-noTM |
| gj_188518870 | gb | ACD56815.1 | 0.123 | 42 | 0.143 | 14 | 0.233 | 10 | 0.208 | 0.167 | N | 0.51 | SignalP-TM   |
| gj_188518871 | gb | ACD56816.1 | 0.127 | 32 | 0.109 | 48 | 0.163 | 43 | 0.062 | 0.091 | N | 0.51 | SignalP-TM   |
| gj_188518878 | gb | ACD56823.1 | 0.116 | 8  | 0.104 | 35 | 0.124 | 2  | 0.099 | 0.102 | N | 0.57 | SignalP-noTM |
| gj_188518879 | gb | ACD56824.1 | 0.225 | 25 | 0.151 | 25 | 0.205 | 1  | 0.129 | 0.141 | N | 0.57 | SignalP-noTM |
| gj_188518884 | gb | ACD56829.1 | 0.792 | 20 | 0.805 | 20 | 0.917 | 16 | 0.815 | 0.81  | Y | 0.57 | SignalP-noTM |
| gj_188518885 | gb | ACD56830.1 | 0.814 | 32 | 0.749 | 32 | 0.788 | 28 | 0.627 | 0.692 | Y | 0.57 | SignalP-noTM |
| gj_188518887 | gb | ACD56832.1 | 0.138 | 31 | 0.248 | 18 | 0.76  | 15 | 0.559 | 0.394 | N | 0.57 | SignalP-noTM |
| gj_188518888 | gb | ACD56833.1 | 0.138 | 33 | 0.112 | 19 | 0.143 | 11 | 0.115 | 0.113 | N | 0.57 | SignalP-noTM |
| gj_188518889 | gb | ACD56834.1 | 0.407 | 33 | 0.569 | 33 | 0.985 | 14 | 0.897 | 0.723 | Y | 0.57 | SignalP-noTM |
| gj_188518891 | gb | ACD56836.1 | 0.111 | 38 | 0.103 | 69 | 0.123 | 6  | 0.08  | 0.092 | N | 0.57 | SignalP-noTM |
| gj_188518893 | gb | ACD56838.1 | 0.237 | 32 | 0.166 | 32 | 0.16  | 1  | 0.114 | 0.142 | N | 0.57 | SignalP-noTM |
| gj_188518894 | gb | ACD56839.1 | 0.118 | 66 | 0.137 | 13 | 0.24  | 6  | 0.193 | 0.164 | N | 0.57 | SignalP-noTM |
| gj_188518895 | gb | ACD56840.1 | 0.128 | 51 | 0.132 | 51 | 0.181 | 47 | 0.131 | 0.132 | N | 0.57 | SignalP-noTM |
| gj_188518896 | gb | ACD56841.1 | 0.111 | 57 | 0.178 | 32 | 0.467 | 25 | 0.246 | 0.21  | N | 0.57 | SignalP-noTM |
| gj_188518897 | gb | ACD56842.1 | 0.1   | 25 | 0.1   | 25 | 0.121 | 3  | 0.098 | 0.099 | N | 0.57 | SignalP-noTM |
| gj_188518900 | gb | ACD56845.1 | 0.151 | 23 | 0.142 | 23 | 0.206 | 17 | 0.129 | 0.136 | N | 0.57 | SignalP-noTM |
| gj_188518901 | gb | ACD56846.1 | 0.135 | 40 | 0.12  | 24 | 0.16  | 38 | 0.11  | 0.117 | N | 0.51 | SignalP-TM   |
| gj_188518908 | gb | ACD56853.1 | 0.165 | 49 | 0.21  | 49 | 0.417 | 37 | 0.164 | 0.188 | N | 0.57 | SignalP-noTM |
| gj_188518910 | gb | ACD56855.1 | 0.111 | 33 | 0.126 | 26 | 0.197 | 1  | 0.132 | 0.128 | N | 0.51 | SignalP-TM   |
| gj_188518916 | gb | ACD56861.1 | 0.136 | 22 | 0.144 | 22 | 0.27  | 1  | 0.158 | 0.15  | N | 0.57 | SignalP-noTM |
| gj_188518917 | gb | ACD56862.1 | 0.111 | 20 | 0.112 | 11 | 0.182 | 2  | 0.121 | 0.116 | N | 0.57 | SignalP-noTM |
| gj_188518919 | gb | ACD56864.1 | 0.106 | 43 | 0.106 | 43 | 0.136 | 10 | 0.1   | 0.104 | N | 0.57 | SignalP-noTM |
| gj_188518920 | gb | ACD56865.1 | 0.166 | 10 | 0.107 | 20 | 0.229 | 8  | 0.106 | 0.107 | N | 0.57 | SignalP-noTM |
| gj_188518921 | gb | ACD56866.1 | 0.128 | 29 | 0.123 | 29 | 0.141 | 26 | 0.098 | 0.111 | N | 0.57 | SignalP-noTM |
| gj_188518922 | gb | ACD56867.1 | 0.107 | 27 | 0.129 | 11 | 0.22  | 5  | 0.18  | 0.148 | N | 0.51 | SignalP-TM   |
| gj_188518926 | gb | ACD56871.1 | 0.288 | 34 | 0.181 | 34 | 0.416 | 4  | 0.19  | 0.185 | N | 0.57 | SignalP-noTM |
| gj_188518927 | gb | ACD56872.1 | 0.79  | 28 | 0.876 | 28 | 0.985 | 18 | 0.949 | 0.91  | Y | 0.57 | SignalP-noTM |
| gj_188518928 | gb | ACD56873.1 | 0.199 | 22 | 0.261 | 22 | 0.47  | 8  | 0.359 | 0.307 | N | 0.57 | SignalP-noTM |
| gj_188518929 | gb | ACD56874.1 | 0.127 | 44 | 0.114 | 42 | 0.154 | 22 | 0.105 | 0.109 | N | 0.57 | SignalP-noTM |
| gj_188518930 | gb | ACD56875.1 | 0.107 | 52 | 0.114 | 52 | 0.172 | 49 | 0.093 | 0.104 | N | 0.57 | SignalP-noTM |
| gj_188518933 | gb | ACD56878.1 | 0.192 | 20 | 0.127 | 20 | 0.12  | 2  | 0.089 | 0.109 | N | 0.57 | SignalP-noTM |
| gj_188518935 | gb | ACD56880.1 | 0.109 | 57 | 0.138 | 11 | 0.252 | 2  | 0.193 | 0.164 | N | 0.57 | SignalP-noTM |
| gj_188518936 | gb | ACD56881.1 | 0.155 | 49 | 0.155 | 49 | 0.229 | 47 | 0.125 | 0.141 | N | 0.57 | SignalP-noTM |
| gj_188518937 | gb | ACD56882.1 | 0.117 | 48 | 0.138 | 11 | 0.257 | 1  | 0.184 | 0.16  | N | 0.57 | SignalP-noTM |
| gj_188518938 | gb | ACD56883.1 | 0.124 | 36 | 0.123 | 11 | 0.273 | 35 | 0.169 | 0.14  | N | 0.51 | SignalP-TM   |
| gj_188518939 | gb | ACD56884.1 | 0.114 | 26 | 0.096 | 47 | 0.099 | 45 | 0.07  | 0.084 | N | 0.57 | SignalP-noTM |
| gj_188518940 | gb | ACD56885.1 | 0.142 | 63 | 0.129 | 15 | 0.269 | 12 | 0.165 | 0.146 | N | 0.57 | SignalP-noTM |
| gj_188518941 | gb | ACD56886.1 | 0.121 | 36 | 0.122 | 38 | 0.278 | 35 | 0.104 | 0.115 | N | 0.51 | SignalP-TM   |
| gj_188518945 | gb | ACD56890.1 | 0.112 | 65 | 0.12  | 11 | 0.227 | 1  | 0.134 | 0.127 | N | 0.57 | SignalP-noTM |
| gj_188518946 | gb | ACD56891.1 | 0.133 | 34 | 0.125 | 11 | 0.188 | 4  | 0.163 | 0.139 | N | 0.51 | SignalP-TM   |
| gj_188518947 | gb | ACD56892.1 | 0.117 | 34 | 0.102 | 70 | 0.116 | 69 | 0.079 | 0.091 | N | 0.57 | SignalP-noTM |
| gj_188518953 | gb | ACD56898.1 | 0.149 | 24 | 0.169 | 24 | 0.292 | 1  | 0.201 | 0.181 | N | 0.51 | SignalP-TM   |
| gj_188518954 | gb | ACD56899.1 | 0.295 | 21 | 0.246 | 21 | 0.279 | 20 | 0.193 | 0.221 | N | 0.57 | SignalP-noTM |
| gj_188518955 | gb | ACD56900.1 | 0.383 | 31 | 0.529 | 31 | 0.968 | 14 | 0.847 | 0.678 | Y | 0.57 | SignalP-noTM |
| gj_188518959 | gb | ACD56904.1 | 0.133 | 35 | 0.132 | 35 | 0.157 | 29 | 0.114 | 0.124 | N | 0.57 | SignalP-noTM |
| gj_188518960 | gb | ACD56905.1 | 0.102 | 27 | 0.098 | 11 | 0.129 | 8  | 0.096 | 0.097 | N | 0.57 | SignalP-noTM |
| gj_188518961 | gb | ACD56906.1 | 0.134 | 18 | 0.153 | 18 | 0.246 | 5  | 0.184 | 0.168 | N | 0.57 | SignalP-noTM |
| gj_188518962 | gb | ACD56907.1 | 0.103 | 10 | 0.095 | 39 | 0.1   | 41 | 0.078 | 0.087 | N | 0.57 | SignalP-noTM |
| gj_188518965 | gb | ACD56910.1 | 0.223 | 39 | 0.404 | 39 | 0.898 | 38 | 0.533 | 0.465 | N | 0.57 | SignalP-noTM |
| gj_188518966 | gb | ACD56911.1 | 0.147 | 61 | 0.139 | 11 | 0.339 | 1  | 0.17  | 0.153 | N | 0.57 | SignalP-noTM |
| gj_188518971 | gb | ACD56916.1 | 0.166 | 30 | 0.311 | 30 | 0.838 | 8  | 0.644 | 0.468 | N | 0.57 | SignalP-noTM |
| gj_188518972 | gb | ACD56917.1 | 0.136 | 26 | 0.118 | 26 | 0.153 | 51 | 0.104 | 0.111 | N | 0.57 | SignalP-noTM |
| gj_188518973 | gb | ACD56918.1 | 0.105 | 30 | 0.109 | 30 | 0.123 | 27 | 0.092 | 0.101 | N | 0.57 | SignalP-noTM |
| gj_188518974 | gb | ACD56919.1 | 0.162 | 33 | 0.132 | 33 | 0.203 | 19 | 0.123 | 0.128 | N | 0.57 | SignalP-noTM |
| gj_188518976 | gb | ACD56921.1 | 0.82  | 22 | 0.84  | 22 | 0.962 | 18 | 0.878 | 0.858 | Y | 0.57 | SignalP-noTM |
| gj_188518977 | gb | ACD56922.1 | 0.105 | 20 | 0.102 | 64 | 0.138 | 1  | 0.095 | 0.099 | N | 0.57 | SignalP-noTM |
| gj_188518978 | gb | ACD56923.1 | 0.168 | 27 | 0.176 | 27 | 0.35  | 34 | 0.183 | 0.179 | N | 0.57 | SignalP-noTM |
| gj_188518979 | gb | ACD56924.1 | 0.109 | 29 | 0.131 | 11 | 0.274 | 1  | 0.162 | 0.146 | N | 0.57 | SignalP-noTM |
| gj_188518980 | gb | ACD56925.1 | 0.129 | 42 | 0.126 | 11 | 0.209 | 5  | 0.171 | 0.142 | N | 0.51 | SignalP-TM   |
| gj_188518985 | gb | ACD56930.1 | 0.192 | 53 | 0.138 | 53 | 0.133 | 50 | 0.068 | 0.112 | N | 0.51 | SignalP-TM   |
| gj_188518986 | gb | ACD56931.1 | 0.732 | 22 | 0.794 | 22 | 0.942 | 18 | 0.883 | 0.836 | Y | 0.57 | SignalP-noTM |
| gj_188518987 | gb | ACD56932.1 | 0.127 | 49 | 0.142 | 32 | 0.227 | 28 | 0.15  | 0.145 | N | 0.51 | SignalP-TM   |
| gj_188518988 | gb | ACD56933.1 | 0.901 | 20 | 0.935 | 20 | 0.983 | 18 | 0.959 | 0.946 | Y | 0.57 | SignalP-noTM |
| gj_188518990 | gb | ACD56935.1 | 0.141 | 24 | 0.151 | 24 | 0.252 | 3  | 0.173 | 0.162 | N | 0.57 | SignalP-noTM |
| gj_188518991 | gb | ACD56936.1 | 0.154 | 14 | 0.128 | 14 | 0.291 | 1  | 0.12  | 0.124 | N | 0.57 | SignalP-noTM |
| gj_188518995 | gb | ACD56940.1 | 0.127 | 66 | 0.107 | 53 | 0.118 | 13 | 0.091 | 0.099 | N | 0.57 | SignalP-noTM |
| gj_188518996 | gb | ACD56941.1 | 0.148 | 29 | 0.13  | 29 | 0.139 | 28 | 0.118 | 0.125 | N | 0.57 | SignalP-noTM |
| gj_188518997 | gb | ACD56942.1 | 0.149 | 21 | 0.143 | 30 | 0.211 | 2  | 0.128 | 0.137 | N | 0.51 | SignalP-TM   |
| gj_188518998 | gb | ACD56943.1 | 0.279 | 27 | 0.258 | 27 | 0.377 | 11 | 0.279 | 0.267 | N | 0.57 | SignalP-noTM |
| gj_188518999 | gb | ACD56944.1 | 0.114 | 60 | 0.108 | 60 | 0.13  | 10 | 0.076 | 0.093 | N | 0.57 | SignalP-noTM |
| gj_188519000 | gb | ACD56945.1 | 0.107 | 32 | 0.109 | 38 | 0.17  | 31 | 0.102 | 0.106 | N | 0.57 | SignalP-noTM |
| gj_188519001 | gb | ACD56946.1 | 0.162 | 23 | 0.221 | 23 | 0.503 | 11 | 0.309 | 0.262 | N | 0.57 | SignalP-noTM |
| gj_188519002 | gb | ACD56947.1 | 0.129 | 45 | 0.118 | 45 | 0.148 | 1  | 0.103 | 0.111 | N | 0.57 | SignalP-noTM |
| gj_188519003 | gb | ACD56948.1 | 0.113 | 26 | 0.166 | 26 | 0.31  | 1  | 0.216 | 0.185 | N | 0.51 | SignalP-TM   |
| gj_188519004 | gb | ACD56949.1 | 0.163 | 37 | 0.162 | 37 | 0.27  | 23 | 0.16  | 0.161 | N | 0.57 | SignalP-noTM |
| gj_188519005 | gb | ACD56950.1 | 0.224 | 28 | 0.136 | 28 | 0.123 | 9  | 0.088 | 0.113 | N | 0.57 | SignalP-noTM |
| gj_188519006 | gb | ACD56951.1 | 0.118 | 28 | 0.116 | 11 | 0.187 | 1  | 0.135 | 0.125 | N | 0.57 | SignalP-noTM |

|          |          |          |          |              |    |            |
|----------|----------|----------|----------|--------------|----|------------|
| 0.341414 | 0.907711 | 0.412413 | 0.553846 | gj_188519001 | gb | ACD56946.1 |
| 0.11847  | 0.072024 | 0.094833 | 0.095109 | gj_188519002 | gb | ACD56947.1 |
| 0.145916 | 0.0527   | 0.126861 | 0.108492 | gj_188519003 | gb | ACD56948.1 |
| 0.154727 | 0.047291 | 0.156699 | 0.119572 | gj_188519004 | gb | ACD56949.1 |
| 0.132274 | 0.061572 | 0.158291 | 0.117379 | gj_188519005 | gb | ACD56950.1 |
| 0.927169 | 0.998445 | 0.825491 | 0.917035 | gj_188519006 | gb | ACD56951.1 |
| 0.105931 | 0.031038 | 0.142583 | 0.093184 | gj_188519007 | gb | ACD56952.1 |
| 0.722521 | 0.013321 | 0.752129 | 0.49599  | gj_188519009 | gb | ACD56954.1 |
| 0.299643 | 0.224088 | 0.267371 | 0.263701 | gj_188519011 | gb | ACD56956.1 |
| 0.13193  | 0.005051 | 0.087384 | 0.074788 | gj_188519012 | gb | ACD56957.1 |
| 0.072426 | 0.035468 | 0.164379 | 0.090758 | gj_188519013 | gb | ACD56958.1 |
| 0.135755 | 0.132964 | 0.105647 | 0.124789 | gj_188519014 | gb | ACD56959.1 |
| 0.153944 | 0.564882 | 0.108225 | 0.275684 | gj_188519015 | gb | ACD56960.1 |
| 0.931884 | 0.999023 | 0.862475 | 0.931127 | gj_188519016 | gb | ACD56961.1 |
| 0.743645 | 0.997006 | 0.779542 | 0.840064 | gj_188519017 | gb | ACD56962.1 |
| 0.746494 | 0.999176 | 0.882467 | 0.876046 | gj_188519023 | gb | ACD56968.1 |
| 0.950781 | 0.999833 | 0.908462 | 0.953025 | gj_188519024 | gb | ACD56969.1 |
| 0.16645  | 0.048939 | 0.163557 | 0.126315 | gj_188519027 | gb | ACD56972.1 |
| 0.317562 | 0.194348 | 0.279891 | 0.263934 | gj_188518837 | gb | ACD56782.1 |
| 0.179314 | 0.822882 | 0.161515 | 0.387904 | gj_188518838 | gb |            |

|                            |       |    |       |    |       |    |       |       |   |      |              |
|----------------------------|-------|----|-------|----|-------|----|-------|-------|---|------|--------------|
| gi_188519007.gb_ACD56952.1 | 0.294 | 38 | 0.203 | 38 | 0.226 | 36 | 0.144 | 0.181 | N | 0.51 | SignalP-TM   |
| gi_188519009.gb_ACD56954.1 | 0.115 | 25 | 0.098 | 39 | 0.111 | 39 | 0.084 | 0.091 | N | 0.57 | SignalP-noTM |
| gi_188519011.gb_ACD56956.1 | 0.112 | 37 | 0.103 | 11 | 0.124 | 1  | 0.106 | 0.104 | N | 0.57 | SignalP-noTM |
| gi_188519012.gb_ACD56957.1 | 0.116 | 24 | 0.138 | 17 | 0.223 | 13 | 0.19  | 0.163 | N | 0.57 | SignalP-noTM |
| gi_188519013.gb_ACD56958.1 | 0.6   | 36 | 0.734 | 36 | 0.982 | 15 | 0.913 | 0.818 | Y | 0.57 | SignalP-noTM |
| gi_188519014.gb_ACD56959.1 | 0.296 | 29 | 0.164 | 29 | 0.205 | 44 | 0.084 | 0.127 | N | 0.57 | SignalP-noTM |
| gi_188519015.gb_ACD56960.1 | 0.202 | 38 | 0.154 | 38 | 0.249 | 29 | 0.106 | 0.131 | N | 0.57 | SignalP-noTM |
| gi_188519016.gb_ACD56961.1 | 0.241 | 25 | 0.457 | 25 | 0.976 | 17 | 0.906 | 0.668 | Y | 0.57 | SignalP-noTM |
| gi_188519017.gb_ACD56962.1 | 0.272 | 28 | 0.134 | 50 | 0.156 | 41 | 0.082 | 0.109 | N | 0.57 | SignalP-noTM |
| gi_188519023.gb_ACD56968.1 | 0.795 | 33 | 0.883 | 33 | 0.993 | 20 | 0.941 | 0.91  | Y | 0.57 | SignalP-noTM |
| gi_188519024.gb_ACD56969.1 | 0.188 | 44 | 0.244 | 44 | 0.578 | 40 | 0.291 | 0.266 | N | 0.57 | SignalP-noTM |
| gi_188519027.gb_ACD56972.1 | 0.134 | 35 | 0.132 | 17 | 0.216 | 5  | 0.164 | 0.147 | N | 0.57 | SignalP-noTM |
| gi_188519028.gb_ACD56973.1 | 0.13  | 60 | 0.127 | 60 | 0.21  | 5  | 0.119 | 0.123 | N | 0.57 | SignalP-noTM |
| gi_188519029.gb_ACD56974.1 | 0.287 | 55 | 0.183 | 55 | 0.297 | 10 | 0.15  | 0.167 | N | 0.57 | SignalP-noTM |
| gi_188519030.gb_ACD56975.1 | 0.107 | 44 | 0.114 | 42 | 0.197 | 39 | 0.113 | 0.113 | N | 0.57 | SignalP-noTM |
| gi_188519031.gb_ACD56976.1 | 0.262 | 30 | 0.18  | 30 | 0.228 | 29 | 0.093 | 0.139 | N | 0.57 | SignalP-noTM |
| gi_188519032.gb_ACD56977.1 | 0.146 | 30 | 0.136 | 30 | 0.196 | 20 | 0.123 | 0.13  | N | 0.57 | SignalP-noTM |
| gi_188519033.gb_ACD56978.1 | 0.14  | 26 | 0.139 | 26 | 0.192 | 25 | 0.133 | 0.136 | N | 0.57 | SignalP-noTM |
| gi_188519035.gb_ACD56980.1 | 0.107 | 17 | 0.112 | 33 | 0.143 | 30 | 0.109 | 0.11  | N | 0.57 | SignalP-noTM |
| gi_188519036.gb_ACD56981.1 | 0.123 | 21 | 0.109 | 21 | 0.114 | 14 | 0.096 | 0.103 | N | 0.57 | SignalP-noTM |
| gi_188519037.gb_ACD56982.1 | 0.132 | 46 | 0.103 | 26 | 0.101 | 20 | 0.081 | 0.092 | N | 0.57 | SignalP-noTM |
| gi_188519040.gb_ACD56985.1 | 0.114 | 55 | 0.157 | 11 | 0.334 | 2  | 0.243 | 0.197 | N | 0.57 | SignalP-noTM |
| gi_188519042.gb_ACD56987.1 | 0.637 | 23 | 0.736 | 23 | 0.966 | 10 | 0.89  | 0.808 | Y | 0.57 | SignalP-noTM |
| gi_188519045.gb_ACD56990.1 | 0.111 | 62 | 0.099 | 41 | 0.103 | 29 | 0.084 | 0.092 | N | 0.57 | SignalP-noTM |
| gi_188519046.gb_ACD56991.1 | 0.146 | 20 | 0.139 | 20 | 0.177 | 19 | 0.12  | 0.13  | N | 0.57 | SignalP-noTM |
| gi_188519047.gb_ACD56992.1 | 0.105 | 32 | 0.099 | 32 | 0.101 | 24 | 0.087 | 0.093 | N | 0.57 | SignalP-noTM |
| gi_188519050.gb_ACD56995.1 | 0.105 | 45 | 0.105 | 51 | 0.184 | 42 | 0.087 | 0.096 | N | 0.57 | SignalP-noTM |
| gi_188519052.gb_ACD56997.1 | 0.113 | 18 | 0.18  | 18 | 0.362 | 2  | 0.299 | 0.236 | N | 0.57 | SignalP-noTM |
| gi_188519053.gb_ACD56998.1 | 0.104 | 19 | 0.121 | 11 | 0.273 | 1  | 0.128 | 0.124 | N | 0.51 | SignalP-TM   |
| gi_188519058.gb_ACD57003.1 | 0.147 | 41 | 0.144 | 18 | 0.263 | 15 | 0.214 | 0.17  | N | 0.51 | SignalP-TM   |
| gi_188519059.gb_ACD57004.1 | 0.13  | 51 | 0.111 | 51 | 0.137 | 23 | 0.106 | 0.108 | N | 0.57 | SignalP-noTM |
| gi_188519064.gb_ACD57009.1 | 0.126 | 35 | 0.18  | 32 | 0.348 | 30 | 0.245 | 0.204 | N | 0.51 | SignalP-TM   |
| gi_188519065.gb_ACD57010.1 | 0.315 | 12 | 0.473 | 12 | 0.871 | 11 | 0.711 | 0.585 | Y | 0.57 | SignalP-noTM |
| gi_188519066.gb_ACD57011.1 | 0.146 | 26 | 0.111 | 41 | 0.158 | 33 | 0.09  | 0.101 | N | 0.57 | SignalP-noTM |
| gi_188519067.gb_ACD57012.1 | 0.178 | 45 | 0.26  | 19 | 0.741 | 15 | 0.554 | 0.398 | N | 0.57 | SignalP-noTM |
| gi_188519068.gb_ACD57013.1 | 0.676 | 23 | 0.793 | 23 | 0.98  | 19 | 0.943 | 0.864 | Y | 0.57 | SignalP-noTM |
| gi_188519069.gb_ACD57014.1 | 0.156 | 51 | 0.162 | 37 | 0.36  | 29 | 0.166 | 0.164 | N | 0.57 | SignalP-noTM |
| gi_188519070.gb_ACD57015.1 | 0.382 | 25 | 0.581 | 25 | 0.957 | 21 | 0.862 | 0.713 | Y | 0.57 | SignalP-noTM |
| gi_188519071.gb_ACD57016.1 | 0.115 | 55 | 0.104 | 55 | 0.1   | 44 | 0.078 | 0.092 | N | 0.57 | SignalP-noTM |
| gi_188519080.gb_ACD57025.1 | 0.12  | 45 | 0.187 | 45 | 0.504 | 43 | 0.23  | 0.207 | N | 0.57 | SignalP-noTM |
| gi_188519082.gb_ACD57027.1 | 0.136 | 41 | 0.212 | 36 | 0.49  | 26 | 0.326 | 0.265 | N | 0.57 | SignalP-noTM |
| gi_188519083.gb_ACD57028.1 | 0.115 | 44 | 0.108 | 18 | 0.185 | 10 | 0.1   | 0.104 | N | 0.57 | SignalP-noTM |
| gi_188519084.gb_ACD57029.1 | 0.104 | 30 | 0.163 | 11 | 0.335 | 1  | 0.258 | 0.208 | N | 0.57 | SignalP-noTM |
| gi_188519085.gb_ACD57030.1 | 0.112 | 29 | 0.171 | 11 | 0.439 | 1  | 0.271 | 0.218 | N | 0.57 | SignalP-noTM |
| gi_188519088.gb_ACD57033.1 | 0.75  | 20 | 0.75  | 20 | 0.876 | 1  | 0.758 | 0.754 | Y | 0.57 | SignalP-noTM |
| gi_188519089.gb_ACD57034.1 | 0.154 | 30 | 0.153 | 30 | 0.245 | 24 | 0.125 | 0.142 | N | 0.51 | SignalP-TM   |
| gi_188519090.gb_ACD57035.1 | 0.1   | 57 | 0.102 | 29 | 0.114 | 22 | 0.097 | 0.099 | N | 0.57 | SignalP-noTM |
| gi_188519091.gb_ACD57036.1 | 0.125 | 51 | 0.113 | 65 | 0.157 | 59 | 0.071 | 0.097 | N | 0.51 | SignalP-TM   |
| gi_188519096.gb_ACD57041.1 | 0.2   | 29 | 0.15  | 29 | 0.222 | 4  | 0.123 | 0.137 | N | 0.57 | SignalP-noTM |
| gi_188519098.gb_ACD57043.1 | 0.276 | 59 | 0.163 | 59 | 0.298 | 1  | 0.123 | 0.144 | N | 0.57 | SignalP-noTM |
| gi_188519100.gb_ACD57045.1 | 0.148 | 21 | 0.11  | 53 | 0.15  | 47 | 0.087 | 0.099 | N | 0.57 | SignalP-noTM |
| gi_188519101.gb_ACD57046.1 | 0.223 | 53 | 0.17  | 16 | 0.39  | 30 | 0.181 | 0.176 | N | 0.57 | SignalP-noTM |
| gi_188519103.gb_ACD57048.1 | 0.189 | 35 | 0.145 | 35 | 0.15  | 34 | 0.1   | 0.124 | N | 0.57 | SignalP-noTM |
| gi_188519108.gb_ACD57053.1 | 0.132 | 24 | 0.172 | 11 | 0.381 | 8  | 0.303 | 0.234 | N | 0.57 | SignalP-noTM |
| gi_188519110.gb_ACD57055.1 | 0.539 | 31 | 0.299 | 31 | 0.358 | 7  | 0.22  | 0.269 | N | 0.51 | SignalP-TM   |
| gi_188519113.gb_ACD57058.1 | 0.127 | 6  | 0.108 | 52 | 0.146 | 5  | 0.1   | 0.105 | N | 0.57 | SignalP-noTM |
| gi_188519114.gb_ACD57059.1 | 0.153 | 21 | 0.184 | 32 | 0.496 | 28 | 0.265 | 0.222 | N | 0.57 | SignalP-noTM |
| gi_188519115.gb_ACD57060.1 | 0.185 | 20 | 0.296 | 18 | 0.737 | 2  | 0.53  | 0.382 | N | 0.51 | SignalP-TM   |
| gi_188519116.gb_ACD57061.1 | 0.187 | 58 | 0.313 | 19 | 0.708 | 8  | 0.573 | 0.409 | N | 0.51 | SignalP-TM   |
| gi_188519117.gb_ACD57062.1 | 0.194 | 54 | 0.204 | 54 | 0.337 | 52 | 0.12  | 0.173 | N | 0.51 | SignalP-TM   |
| gi_188519119.gb_ACD57064.1 | 0.208 | 36 | 0.165 | 36 | 0.268 | 33 | 0.093 | 0.131 | N | 0.57 | SignalP-noTM |
| gi_188519120.gb_ACD57065.1 | 0.137 | 47 | 0.114 | 47 | 0.125 | 43 | 0.085 | 0.101 | N | 0.57 | SignalP-noTM |
| gi_188519121.gb_ACD57066.1 | 0.123 | 49 | 0.161 | 49 | 0.367 | 42 | 0.145 | 0.154 | N | 0.57 | SignalP-noTM |
| gi_188519122.gb_ACD57067.1 | 0.314 | 37 | 0.379 | 19 | 0.943 | 15 | 0.903 | 0.625 | Y | 0.57 | SignalP-noTM |
| gi_188519126.gb_ACD57071.1 | 0.106 | 56 | 0.106 | 11 | 0.152 | 1  | 0.108 | 0.107 | N | 0.57 | SignalP-noTM |
| gi_188519129.gb_ACD57074.1 | 0.11  | 50 | 0.169 | 38 | 0.383 | 31 | 0.198 | 0.183 | N | 0.57 | SignalP-noTM |
| gi_188519130.gb_ACD57075.1 | 0.118 | 65 | 0.179 | 11 | 0.427 | 3  | 0.325 | 0.248 | N | 0.57 | SignalP-noTM |
| gi_188519142.gb_ACD57087.1 | 0.15  | 29 | 0.137 | 29 | 0.203 | 28 | 0.1   | 0.119 | N | 0.57 | SignalP-noTM |
| gi_188519143.gb_ACD57088.1 | 0.726 | 54 | 0.416 | 54 | 0.497 | 51 | 0.156 | 0.32  | N | 0.51 | SignalP-TM   |
| gi_188519145.gb_ACD57090.1 | 0.125 | 61 | 0.099 | 61 | 0.107 | 21 | 0.079 | 0.09  | N | 0.57 | SignalP-noTM |
| gi_188519150.gb_ACD57095.1 | 0.172 | 23 | 0.172 | 23 | 0.316 | 20 | 0.193 | 0.18  | N | 0.51 | SignalP-TM   |
| gi_188519153.gb_ACD57098.1 | 0.106 | 37 | 0.105 | 46 | 0.127 | 39 | 0.087 | 0.096 | N | 0.57 | SignalP-noTM |
| gi_188519154.gb_ACD57099.1 | 0.24  | 24 | 0.255 | 24 | 0.486 | 34 | 0.297 | 0.275 | N | 0.57 | SignalP-noTM |
| gi_188519155.gb_ACD57100.1 | 0.153 | 27 | 0.128 | 27 | 0.147 | 1  | 0.102 | 0.116 | N | 0.57 | SignalP-noTM |
| gi_188519156.gb_ACD57101.1 | 0.127 | 46 | 0.133 | 46 | 0.213 | 5  | 0.14  | 0.136 | N | 0.57 | SignalP-noTM |
| gi_188519157.gb_ACD57102.1 | 0.132 | 20 | 0.122 | 20 | 0.153 | 13 | 0.103 | 0.113 | N | 0.57 | SignalP-noTM |
| gi_188519164.gb_ACD57109.1 | 0.12  | 42 | 0.176 | 11 | 0.52  | 2  | 0.314 | 0.241 | N | 0.57 | SignalP-noTM |
| gi_188519165.gb_ACD57110.1 | 0.103 | 59 | 0.117 | 25 | 0.159 | 21 | 0.114 | 0.116 | N | 0.57 | SignalP-noTM |

|          |          |          |          |                            |
|----------|----------|----------|----------|----------------------------|
| 0.145542 | 0.368886 | 0.107647 | 0.207358 | gi_188518776.gb_ACD56721.1 |
| 0.753246 | 0.855573 | 0.741925 | 0.783581 | gi_188518779.gb_ACD56724.1 |
| 0.669296 | 0.969587 | 0.693387 | 0.777423 | gi_188518780.gb_ACD56725.1 |
| 0.188314 | 0.017225 | 0.246197 | 0.150579 | gi_188518781.gb_ACD56726.1 |
| 0.193411 | 0.001906 | 0.287819 | 0.161045 | gi_188518782.gb_ACD56727.1 |
| 0.13193  | 0.712181 | 0.076139 | 0.30675  | gi_188518787.gb_ACD56732.1 |
| 0.885238 | 0.919753 | 0.890903 | 0.898631 | gi_188518788.gb_ACD56733.1 |
| 0.052522 | 0.00277  | 0.109975 | 0.054999 | gi_188518789.gb_ACD56734.1 |
| 0.334701 | 0.134354 | 0.450661 | 0.306572 | gi_188518790.gb_ACD56735.1 |
| 0.106215 | 0.823319 | 0.068881 | 0.332805 | gi_188518799.gb_ACD56744.1 |
| 0.077201 | 0.036827 | 0.127527 | 0.080518 | gi_188518802.gb_ACD56747.1 |
| 0.944065 | 0.999071 | 0.933205 | 0.95878  | gi_188518803.gb_ACD56748.1 |
| 0.150077 | 0.055148 | 0.197182 | 0.134136 | gi_188519028.gb_ACD56973.1 |
| 0.56193  | 0.109389 | 0.657911 | 0.443077 | gi_188519029.gb_ACD56974.1 |
| 0.24453  | 0.970886 | 0.086432 | 0.433949 | gi_188519030.gb_ACD56975.1 |
| 0.109681 | 0.053911 | 0.108515 | 0.090702 | gi_188519031.gb_ACD56976.1 |
| 0.400832 | 0.031219 | 0.511998 | 0.314683 | gi_188519032.gb_ACD56977.1 |
| 0.156699 | 0.012407 | 0.189233 | 0.119446 | gi_188519033.gb_ACD56978.1 |
| 0.201491 | 0.112346 | 0.317562 | 0.210466 | gi_188519035.gb_ACD56980.1 |
| 0.120999 | 0.066608 | 0.095901 | 0.094233 | gi_188519036.gb_ACD56981.1 |
| 0.14295  | 0.093506 | 0.171931 | 0.116647 | gi_188519037.gb_ACD56982.1 |
| 0.204891 | 0.901233 | 0.131244 | 0.412456 | gi_188519040.gb_ACD56985.1 |
| 0.159986 | 0.041567 | 0.213829 | 0.138431 | gi_188519042.gb_ACD56987.1 |
| 0.43807  | 0.373788 | 0.310454 | 0.374104 | gi_188519045.gb_ACD56990.1 |
| 0.108226 | 0.152775 | 0.126529 | 0.129176 | gi_188519046.gb_ACD56991.1 |
| 0.120681 | 0.022643 | 0.211318 | 0.118214 | gi_188519047.gb_ACD56992.1 |
| 0.111749 | 0.031493 | 0.152    | 0.098414 | gi_188519050.gb_ACD56995.1 |
| 0.121319 | 0.044788 | 0.141851 | 0.102653 | gi_188519052.gb_ACD56997.1 |
| 0.133658 | 0.062444 | 0.129882 | 0.108661 | gi_188519053.gb_ACD56998.1 |
| 0.225133 | 0.181979 | 0.125868 | 0.17766  | gi_188519058.gb_ACD57003.1 |
| 0.955468 | 0.905424 | 0.860686 | 0.907193 | gi_188519059.gb_ACD57004.1 |
| 0.114762 | 0.201009 | 0.187856 | 0.167876 | gi_18                      |



|                             |       |    |       |    |       |    |       |       |   |      |              |  |
|-----------------------------|-------|----|-------|----|-------|----|-------|-------|---|------|--------------|--|
| gj_188519166.gb.ACD571111.1 | 0.177 | 20 | 0.165 | 20 | 0.241 | 8  | 0.171 | 0.168 | N | 0.57 | SignalP-noTM |  |
| gj_188519167.gb.ACD571121.1 | 0.113 | 27 | 0.135 | 11 | 0.312 | 1  | 0.159 | 0.146 | N | 0.57 | SignalP-noTM |  |
| gj_188519169.gb.ACD571141.1 | 0.12  | 57 | 0.107 | 14 | 0.159 | 4  | 0.114 | 0.11  | N | 0.57 | SignalP-noTM |  |
| gj_188519172.gb.ACD571171.1 | 0.31  | 25 | 0.157 | 11 | 0.373 | 4  | 0.254 | 0.202 | N | 0.57 | SignalP-noTM |  |
| gj_188519174.gb.ACD571191.1 | 0.16  | 30 | 0.168 | 30 | 0.337 | 27 | 0.148 | 0.161 | N | 0.51 | SignalP-TM   |  |
| gj_188519178.gb.ACD571231.1 | 0.243 | 20 | 0.431 | 20 | 0.864 | 1  | 0.767 | 0.589 | Y | 0.57 | SignalP-noTM |  |
| gj_188519180.gb.ACD571251.1 | 0.205 | 29 | 0.22  | 29 | 0.382 | 2  | 0.256 | 0.237 | N | 0.57 | SignalP-noTM |  |
| gj_188519185.gb.ACD571301.1 | 0.145 | 50 | 0.187 | 16 | 0.434 | 10 | 0.239 | 0.211 | N | 0.57 | SignalP-noTM |  |
| gj_188519186.gb.ACD571311.1 | 0.273 | 19 | 0.329 | 19 | 0.483 | 16 | 0.389 | 0.351 | N | 0.51 | SignalP-TM   |  |
| gj_188519187.gb.ACD571321.1 | 0.182 | 28 | 0.2   | 14 | 0.44  | 10 | 0.355 | 0.258 | N | 0.51 | SignalP-TM   |  |
| gj_188519188.gb.ACD571331.1 | 0.12  | 45 | 0.124 | 45 | 0.176 | 34 | 0.099 | 0.112 | N | 0.57 | SignalP-noTM |  |
| gj_188519189.gb.ACD571341.1 | 0.133 | 53 | 0.113 | 53 | 0.129 | 7  | 0.088 | 0.104 | N | 0.51 | SignalP-noTM |  |
| gj_188519190.gb.ACD571351.1 | 0.617 | 23 | 0.767 | 23 | 0.979 | 10 | 0.953 | 0.854 | Y | 0.57 | SignalP-noTM |  |
| gj_188519191.gb.ACD571361.1 | 0.128 | 43 | 0.138 | 11 | 0.254 | 2  | 0.196 | 0.159 | N | 0.51 | SignalP-TM   |  |
| gj_188519192.gb.ACD571371.1 | 0.113 | 22 | 0.109 | 38 | 0.159 | 37 | 0.096 | 0.103 | N | 0.57 | SignalP-noTM |  |
| gj_188519194.gb.ACD571391.1 | 0.113 | 27 | 0.145 | 11 | 0.274 | 5  | 0.213 | 0.177 | N | 0.57 | SignalP-noTM |  |
| gj_188519195.gb.ACD571401.1 | 0.113 | 20 | 0.133 | 11 | 0.288 | 1  | 0.16  | 0.146 | N | 0.57 | SignalP-noTM |  |
| gj_188519198.gb.ACD571431.1 | 0.107 | 22 | 0.103 | 22 | 0.134 | 1  | 0.1   | 0.101 | N | 0.57 | SignalP-noTM |  |
| gj_188519200.gb.ACD571451.1 | 0.198 | 21 | 0.139 | 21 | 0.136 | 9  | 0.106 | 0.124 | N | 0.57 | SignalP-noTM |  |
| gj_188519202.gb.ACD571471.1 | 0.101 | 35 | 0.128 | 16 | 0.218 | 9  | 0.165 | 0.146 | N | 0.57 | SignalP-noTM |  |
| gj_188519204.gb.ACD571491.1 | 0.183 | 38 | 0.15  | 38 | 0.25  | 21 | 0.134 | 0.143 | N | 0.57 | SignalP-noTM |  |
| gj_188519205.gb.ACD571501.1 | 0.15  | 60 | 0.115 | 60 | 0.134 | 5  | 0.086 | 0.102 | N | 0.57 | SignalP-noTM |  |
| gj_188519206.gb.ACD571511.1 | 0.147 | 53 | 0.1   | 40 | 0.115 | 58 | 0.086 | 0.095 | N | 0.51 | SignalP-TM   |  |
| gj_188519207.gb.ACD571521.1 | 0.242 | 52 | 0.153 | 52 | 0.144 | 49 | 0.097 | 0.127 | N | 0.57 | SignalP-noTM |  |
| gj_188519208.gb.ACD571531.1 | 0.139 | 54 | 0.133 | 54 | 0.192 | 51 | 0.111 | 0.122 | N | 0.57 | SignalP-noTM |  |
| gj_188519209.gb.ACD571541.1 | 0.129 | 24 | 0.121 | 11 | 0.217 | 1  | 0.146 | 0.133 | N | 0.57 | SignalP-noTM |  |
| gj_188519212.gb.ACD571571.1 | 0.112 | 44 | 0.108 | 11 | 0.145 | 4  | 0.118 | 0.113 | N | 0.57 | SignalP-noTM |  |
| gj_188519213.gb.ACD571581.1 | 0.129 | 44 | 0.122 | 44 | 0.16  | 43 | 0.087 | 0.106 | N | 0.57 | SignalP-noTM |  |
| gj_188519214.gb.ACD571591.1 | 0.103 | 67 | 0.144 | 34 | 0.286 | 27 | 0.168 | 0.155 | N | 0.57 | SignalP-noTM |  |
| gj_188519215.gb.ACD571601.1 | 0.136 | 40 | 0.122 | 24 | 0.173 | 38 | 0.115 | 0.12  | N | 0.51 | SignalP-TM   |  |
| gj_188519216.gb.ACD571611.1 | 0.123 | 18 | 0.107 | 32 | 0.104 | 25 | 0.085 | 0.097 | N | 0.57 | SignalP-noTM |  |
| gj_188519217.gb.ACD571621.1 | 0.122 | 30 | 0.133 | 30 | 0.212 | 12 | 0.154 | 0.143 | N | 0.57 | SignalP-noTM |  |
| gj_188519219.gb.ACD571641.1 | 0.239 | 13 | 0.23  | 13 | 0.354 | 12 | 0.221 | 0.226 | N | 0.57 | SignalP-noTM |  |
| gj_188519220.gb.ACD571651.1 | 0.122 | 67 | 0.112 | 67 | 0.116 | 1  | 0.089 | 0.101 | N | 0.57 | SignalP-noTM |  |
| gj_188519221.gb.ACD571661.1 | 0.135 | 67 | 0.143 | 30 | 0.221 | 19 | 0.135 | 0.139 | N | 0.57 | SignalP-noTM |  |
| gj_188519223.gb.ACD571681.1 | 0.328 | 33 | 0.2   | 33 | 0.227 | 31 | 0.138 | 0.177 | N | 0.51 | SignalP-TM   |  |
| gj_188519224.gb.ACD571691.1 | 0.141 | 51 | 0.12  | 51 | 0.138 | 31 | 0.104 | 0.113 | N | 0.57 | SignalP-noTM |  |
| gj_188519226.gb.ACD571711.1 | 0.126 | 47 | 0.136 | 21 | 0.18  | 25 | 0.137 | 0.137 | N | 0.51 | SignalP-TM   |  |
| gj_188519228.gb.ACD571731.1 | 0.102 | 44 | 0.104 | 53 | 0.113 | 44 | 0.086 | 0.095 | N | 0.57 | SignalP-noTM |  |
| gj_188519229.gb.ACD571741.1 | 0.144 | 23 | 0.223 | 18 | 0.45  | 14 | 0.347 | 0.281 | N | 0.57 | SignalP-noTM |  |
| gj_188519233.gb.ACD571781.1 | 0.152 | 18 | 0.121 | 27 | 0.172 | 28 | 0.092 | 0.107 | N | 0.57 | SignalP-noTM |  |
| gj_188519237.gb.ACD571821.1 | 0.705 | 28 | 0.791 | 28 | 0.976 | 19 | 0.905 | 0.845 | Y | 0.57 | SignalP-noTM |  |
| gj_188519238.gb.ACD571831.1 | 0.127 | 55 | 0.111 | 31 | 0.144 | 30 | 0.104 | 0.108 | N | 0.57 | SignalP-noTM |  |
| gj_188519241.gb.ACD571861.1 | 0.4   | 25 | 0.225 | 25 | 0.187 | 19 | 0.123 | 0.177 | N | 0.57 | SignalP-noTM |  |
| gj_188519242.gb.ACD571871.1 | 0.235 | 25 | 0.463 | 25 | 0.98  | 12 | 0.93  | 0.683 | Y | 0.57 | SignalP-noTM |  |
| gj_188519247.gb.ACD571921.1 | 0.109 | 19 | 0.175 | 11 | 0.427 | 3  | 0.311 | 0.239 | N | 0.57 | SignalP-noTM |  |
| gj_188519248.gb.ACD571931.1 | 0.101 | 48 | 0.109 | 27 | 0.14  | 21 | 0.102 | 0.106 | N | 0.57 | SignalP-noTM |  |
| gj_188519249.gb.ACD571941.1 | 0.11  | 31 | 0.106 | 31 | 0.113 | 25 | 0.094 | 0.1   | N | 0.57 | SignalP-noTM |  |
| gj_188519250.gb.ACD571951.1 | 0.102 | 36 | 0.107 | 27 | 0.154 | 1  | 0.11  | 0.109 | N | 0.57 | SignalP-noTM |  |
| gj_188519251.gb.ACD571961.1 | 0.332 | 33 | 0.192 | 33 | 0.185 | 32 | 0.095 | 0.147 | N | 0.57 | SignalP-noTM |  |
| gj_188519255.gb.ACD572001.1 | 0.159 | 22 | 0.177 | 17 | 0.439 | 1  | 0.264 | 0.218 | N | 0.57 | SignalP-noTM |  |
| gj_188519256.gb.ACD572011.1 | 0.128 | 40 | 0.118 | 40 | 0.153 | 1  | 0.11  | 0.114 | N | 0.57 | SignalP-noTM |  |
| gj_188519257.gb.ACD572021.1 | 0.113 | 27 | 0.107 | 46 | 0.151 | 18 | 0.099 | 0.103 | N | 0.57 | SignalP-noTM |  |
| gj_188519258.gb.ACD572031.1 | 0.152 | 22 | 0.166 | 11 | 0.337 | 1  | 0.268 | 0.214 | N | 0.57 | SignalP-noTM |  |
| gj_188519260.gb.ACD572051.1 | 0.27  | 41 | 0.197 | 41 | 0.207 | 35 | 0.102 | 0.152 | N | 0.57 | SignalP-noTM |  |
| gj_188519261.gb.ACD572061.1 | 0.165 | 22 | 0.17  | 22 | 0.245 | 20 | 0.141 | 0.156 | N | 0.57 | SignalP-noTM |  |
| gj_188519262.gb.ACD572071.1 | 0.112 | 37 | 0.105 | 37 | 0.116 | 24 | 0.087 | 0.097 | N | 0.57 | SignalP-noTM |  |
| gj_188519263.gb.ACD572081.1 | 0.105 | 20 | 0.102 | 62 | 0.136 | 1  | 0.094 | 0.098 | N | 0.57 | SignalP-noTM |  |
| gj_188519264.gb.ACD572091.1 | 0.167 | 35 | 0.145 | 35 | 0.337 | 34 | 0.109 | 0.128 | N | 0.57 | SignalP-noTM |  |
| gj_188519266.gb.ACD572111.1 | 0.169 | 27 | 0.189 | 20 | 0.374 | 15 | 0.243 | 0.214 | N | 0.57 | SignalP-noTM |  |
| gj_188519268.gb.ACD572131.1 | 0.118 | 62 | 0.14  | 11 | 0.271 | 3  | 0.194 | 0.166 | N | 0.57 | SignalP-noTM |  |
| gj_188519269.gb.ACD572141.1 | 0.104 | 36 | 0.12  | 20 | 0.186 | 31 | 0.139 | 0.129 | N | 0.57 | SignalP-noTM |  |
| gj_188519271.gb.ACD572161.1 | 0.196 | 31 | 0.142 | 31 | 0.157 | 49 | 0.093 | 0.119 | N | 0.57 | SignalP-noTM |  |
| gj_188519273.gb.ACD572181.1 | 0.114 | 31 | 0.127 | 31 | 0.186 | 17 | 0.14  | 0.133 | N | 0.57 | SignalP-noTM |  |
| gj_188519275.gb.ACD572201.1 | 0.142 | 51 | 0.158 | 43 | 0.302 | 35 | 0.142 | 0.152 | N | 0.51 | SignalP-TM   |  |
| gj_188519276.gb.ACD572211.1 | 0.131 | 38 | 0.11  | 38 | 0.141 | 5  | 0.1   | 0.105 | N | 0.57 | SignalP-noTM |  |
| gj_188519277.gb.ACD572221.1 | 0.127 | 69 | 0.157 | 31 | 0.288 | 25 | 0.194 | 0.174 | N | 0.57 | SignalP-noTM |  |
| gj_188519282.gb.ACD572271.1 | 0.107 | 26 | 0.099 | 37 | 0.118 | 1  | 0.094 | 0.097 | N | 0.57 | SignalP-noTM |  |
| gj_188519283.gb.ACD572281.1 | 0.155 | 24 | 0.201 | 24 | 0.465 | 20 | 0.259 | 0.228 | N | 0.57 | SignalP-noTM |  |
| gj_188519290.gb.ACD572351.1 | 0.659 | 27 | 0.785 | 27 | 0.983 | 11 | 0.942 | 0.859 | Y | 0.57 | SignalP-noTM |  |
| gj_188519291.gb.ACD572361.1 | 0.113 | 21 | 0.119 | 21 | 0.159 | 12 | 0.111 | 0.115 | N | 0.57 | SignalP-noTM |  |
| gj_188519299.gb.ACD572441.1 | 0.556 | 17 | 0.702 | 17 | 0.933 | 13 | 0.889 | 0.79  | Y | 0.57 | SignalP-noTM |  |
| gj_188519306.gb.ACD572511.1 | 0.156 | 42 | 0.144 | 42 | 0.211 | 19 | 0.138 | 0.141 | N | 0.57 | SignalP-noTM |  |
| gj_188519307.gb.ACD572521.1 | 0.174 | 25 | 0.214 | 25 | 0.403 | 23 | 0.245 | 0.229 | N | 0.57 | SignalP-noTM |  |
| gj_188519308.gb.ACD572531.1 | 0.155 | 42 | 0.145 | 42 | 0.21  | 19 | 0.138 | 0.141 | N | 0.57 | SignalP-noTM |  |
| gj_188519309.gb.ACD572541.1 | 0.112 | 28 | 0.114 | 11 | 0.184 | 25 | 0.131 | 0.122 | N | 0.57 | SignalP-noTM |  |
| gj_188519311.gb.ACD572561.1 | 0.296 | 20 | 0.156 | 20 | 0.155 | 1  | 0.094 | 0.127 | N | 0.57 | SignalP-noTM |  |
| gj_188519316.gb.ACD572611.1 | 0.481 | 22 | 0.672 | 22 | 0.973 | 18 | 0.937 | 0.797 | Y | 0.57 | SignalP-noTM |  |

|          |          |          |          |                             |
|----------|----------|----------|----------|-----------------------------|
| 0.06985  | 0.012932 | 0.120999 | 0.067927 | gj_188519166.gb.ACD571111.1 |
| 0.312383 | 0.97592  | 0.134005 | 0.474103 | gj_188519167.gb.ACD571121.1 |
| 0.771182 | 0.997076 | 0.674586 | 0.814281 | gj_188519169.gb.ACD571141.1 |
| 0.149313 | 0.02795  | 0.183772 | 0.120345 | gj_188519172.gb.ACD571171.1 |
| 0.193879 | 0.150844 | 0.136108 | 0.160277 | gj_188519174.gb.ACD571191.1 |
| 0.3327   | 0.186487 | 0.34074  | 0.286642 | gj_188519178.gb.ACD571231.1 |
| 0.163967 | 0.109389 | 0.206853 | 0.16007  | gj_188519180.gb.ACD571251.1 |
| 0.299013 | 0.057867 | 0.354344 | 0.237075 | gj_188519185.gb.ACD571301.1 |
| 0.177118 | 0.048522 | 0.201974 | 0.142538 | gj_188519186.gb.ACD571311.1 |
| 0.139314 | 0.183322 | 0.098767 | 0.140468 | gj_188519187.gb.ACD571321.1 |
| 0.389361 | 0.314967 | 0.41314  | 0.372489 | gj_188519188.gb.ACD571331.1 |
| 0.168541 | 0.156699 | 0.14295  | 0.156063 | gj_188519189.gb.ACD571341.1 |
| 0.426291 | 0.177555 | 0.578837 | 0.394228 | gj_188519190.gb.ACD571351.1 |
| 0.110563 | 0.065314 | 0.169384 | 0.115087 | gj_188519191.gb.ACD571361.1 |
| 0.090052 | 0.003477 | 0.103123 | 0.065551 | gj_188519192.gb.ACD571371.1 |
| 0.807524 | 0.395082 | 0.863892 | 0.688833 | gj_188519194.gb.ACD571391.1 |
| 0.456609 | 0.904391 | 0.529964 | 0.630321 | gj_188519195.gb.ACD571401.1 |
| 0.140035 | 0.565665 | 0.115679 | 0.27476  | gj_188519198.gb.ACD571431.1 |
| 0.118784 | 0.516494 | 0.096651 | 0.243976 | gj_188519200.gb.ACD571451.1 |
| 0.29463  | 0.988097 | 0.167284 | 0.483337 | gj_188519202.gb.ACD571471.1 |
| 0.125538 | 0.076988 | 0.172787 | 0.125104 | gj_188519204.gb.ACD571491.1 |
| 0.101197 | 0.531458 | 0.072024 | 0.234893 | gj_188519205.gb.ACD571501.1 |
| 0.105364 | 0.022053 | 0.15046  | 0.092626 | gj_188519206.gb.ACD571511.1 |
| 0.139674 | 0.455121 | 0.106786 | 0.23386  | gj_188519207.gb.ACD571521.1 |
| 0.252372 | 0.086907 | 0.304068 | 0.214449 | gj_188519208.gb.ACD571531.1 |
| 0.094319 | 0.043898 | 0.11385  | 0.084022 | gj_188519209.gb.ACD571541.1 |
| 0.203915 | 0.135755 | 0.277479 | 0.205716 | gj_188519                   |



|                            |       |    |       |    |       |    |       |       |   |      |              |
|----------------------------|-------|----|-------|----|-------|----|-------|-------|---|------|--------------|
| gj_188519476_gb_ACD57421_1 | 0.176 | 30 | 0.195 | 30 | 0.313 | 9  | 0.216 | 0.205 | N | 0.57 | SignalP-noTM |
| gj_188519477_gb_ACD57422_1 | 0.121 | 19 | 0.172 | 13 | 0.412 | 1  | 0.259 | 0.213 | N | 0.57 | SignalP-noTM |
| gj_188519484_gb_ACD57429_1 | 0.141 | 47 | 0.108 | 47 | 0.107 | 40 | 0.08  | 0.095 | N | 0.57 | SignalP-noTM |
| gj_188519485_gb_ACD57430_1 | 0.107 | 21 | 0.113 | 21 | 0.143 | 11 | 0.114 | 0.113 | N | 0.51 | SignalP-TM   |
| gj_188519486_gb_ACD57431_1 | 0.169 | 22 | 0.325 | 22 | 0.898 | 11 | 0.682 | 0.493 | N | 0.57 | SignalP-noTM |
| gj_188519488_gb_ACD57433_1 | 0.115 | 37 | 0.11  | 11 | 0.159 | 5  | 0.123 | 0.116 | N | 0.57 | SignalP-noTM |
| gj_188519489_gb_ACD57434_1 | 0.168 | 22 | 0.131 | 50 | 0.235 | 49 | 0.1   | 0.117 | N | 0.57 | SignalP-noTM |
| gj_188519496_gb_ACD57441_1 | 0.101 | 20 | 0.213 | 11 | 0.576 | 1  | 0.466 | 0.332 | N | 0.57 | SignalP-noTM |
| gj_188519502_gb_ACD57447_1 | 0.103 | 54 | 0.105 | 54 | 0.116 | 49 | 0.088 | 0.097 | N | 0.57 | SignalP-noTM |
| gj_188519503_gb_ACD57448_1 | 0.102 | 37 | 0.116 | 16 | 0.163 | 10 | 0.131 | 0.123 | N | 0.57 | SignalP-noTM |
| gj_188519505_gb_ACD57450_1 | 0.138 | 35 | 0.162 | 11 | 0.37  | 3  | 0.276 | 0.204 | N | 0.51 | SignalP-TM   |
| gj_188519506_gb_ACD57451_1 | 0.121 | 38 | 0.195 | 11 | 0.442 | 1  | 0.374 | 0.279 | N | 0.57 | SignalP-noTM |
| gj_188519507_gb_ACD57452_1 | 0.127 | 54 | 0.201 | 48 | 0.481 | 34 | 0.265 | 0.231 | N | 0.57 | SignalP-noTM |
| gj_188519508_gb_ACD57453_1 | 0.118 | 39 | 0.108 | 39 | 0.123 | 7  | 0.094 | 0.101 | N | 0.57 | SignalP-noTM |
| gj_188519509_gb_ACD57454_1 | 0.129 | 19 | 0.113 | 19 | 0.124 | 1  | 0.098 | 0.106 | N | 0.57 | SignalP-noTM |
| gj_188519510_gb_ACD57455_1 | 0.109 | 12 | 0.107 | 12 | 0.126 | 9  | 0.104 | 0.106 | N | 0.57 | SignalP-noTM |
| gj_188519511_gb_ACD57456_1 | 0.131 | 66 | 0.131 | 39 | 0.216 | 6  | 0.123 | 0.127 | N | 0.57 | SignalP-noTM |
| gj_188519513_gb_ACD57458_1 | 0.161 | 35 | 0.141 | 35 | 0.333 | 34 | 0.108 | 0.126 | N | 0.57 | SignalP-noTM |
| gj_188519514_gb_ACD57459_1 | 0.477 | 20 | 0.419 | 20 | 0.704 | 13 | 0.419 | 0.419 | N | 0.57 | SignalP-noTM |
| gj_188519518_gb_ACD57463_1 | 0.114 | 63 | 0.143 | 11 | 0.345 | 2  | 0.186 | 0.163 | N | 0.57 | SignalP-noTM |
| gj_188519519_gb_ACD57464_1 | 0.294 | 43 | 0.169 | 43 | 0.159 | 1  | 0.089 | 0.131 | N | 0.57 | SignalP-noTM |
| gj_188519520_gb_ACD57465_1 | 0.115 | 62 | 0.136 | 11 | 0.24  | 1  | 0.182 | 0.158 | N | 0.57 | SignalP-noTM |
| gj_188519522_gb_ACD57467_1 | 0.134 | 20 | 0.146 | 20 | 0.259 | 30 | 0.169 | 0.157 | N | 0.57 | SignalP-noTM |
| gj_188519524_gb_ACD57469_1 | 0.165 | 21 | 0.184 | 21 | 0.382 | 2  | 0.237 | 0.204 | N | 0.51 | SignalP-TM   |
| gj_188519530_gb_ACD57475_1 | 0.13  | 26 | 0.108 | 12 | 0.138 | 8  | 0.122 | 0.113 | N | 0.51 | SignalP-TM   |
| gj_188519532_gb_ACD57477_1 | 0.123 | 10 | 0.11  | 23 | 0.155 | 34 | 0.092 | 0.102 | N | 0.57 | SignalP-noTM |
| gj_188519535_gb_ACD57480_1 | 0.261 | 13 | 0.382 | 13 | 0.799 | 10 | 0.559 | 0.465 | N | 0.57 | SignalP-noTM |
| gj_188519536_gb_ACD57481_1 | 0.108 | 48 | 0.103 | 48 | 0.139 | 6  | 0.103 | 0.103 | N | 0.57 | SignalP-noTM |
| gj_188519539_gb_ACD57484_1 | 0.132 | 63 | 0.153 | 54 | 0.336 | 51 | 0.126 | 0.14  | N | 0.57 | SignalP-noTM |
| gj_188519541_gb_ACD57486_1 | 0.114 | 26 | 0.114 | 26 | 0.154 | 22 | 0.109 | 0.111 | N | 0.57 | SignalP-noTM |
| gj_188519542_gb_ACD57487_1 | 0.116 | 23 | 0.144 | 23 | 0.271 | 19 | 0.167 | 0.155 | N | 0.57 | SignalP-noTM |
| gj_188519543_gb_ACD57488_1 | 0.104 | 46 | 0.119 | 11 | 0.199 | 3  | 0.143 | 0.131 | N | 0.57 | SignalP-noTM |
| gj_188519545_gb_ACD57490_1 | 0.111 | 9  | 0.106 | 37 | 0.126 | 33 | 0.08  | 0.094 | N | 0.57 | SignalP-noTM |
| gj_188519547_gb_ACD57492_1 | 0.117 | 18 | 0.112 | 18 | 0.132 | 31 | 0.107 | 0.11  | N | 0.57 | SignalP-noTM |
| gj_188519550_gb_ACD57495_1 | 0.127 | 34 | 0.107 | 34 | 0.15  | 1  | 0.093 | 0.1   | N | 0.57 | SignalP-noTM |
| gj_188519553_gb_ACD57498_1 | 0.139 | 61 | 0.125 | 61 | 0.188 | 33 | 0.111 | 0.118 | N | 0.57 | SignalP-noTM |
| gj_188519556_gb_ACD57501_1 | 0.18  | 38 | 0.154 | 38 | 0.192 | 27 | 0.135 | 0.147 | N | 0.51 | SignalP-TM   |
| gj_188519557_gb_ACD57502_1 | 0.108 | 25 | 0.214 | 11 | 0.574 | 2  | 0.463 | 0.331 | N | 0.57 | SignalP-noTM |
| gj_188519558_gb_ACD57503_1 | 0.241 | 36 | 0.15  | 36 | 0.142 | 44 | 0.085 | 0.12  | N | 0.57 | SignalP-noTM |
| gj_188519559_gb_ACD57504_1 | 0.118 | 20 | 0.122 | 20 | 0.163 | 1  | 0.122 | 0.122 | N | 0.57 | SignalP-noTM |
| gj_188519560_gb_ACD57505_1 | 0.109 | 6  | 0.146 | 14 | 0.289 | 27 | 0.22  | 0.173 | N | 0.51 | SignalP-TM   |
| gj_188519561_gb_ACD57506_1 | 0.613 | 20 | 0.759 | 20 | 0.962 | 10 | 0.935 | 0.842 | Y | 0.57 | SignalP-noTM |
| gj_188519563_gb_ACD57508_1 | 0.411 | 21 | 0.358 | 21 | 0.512 | 16 | 0.275 | 0.319 | N | 0.57 | SignalP-noTM |
| gj_188519566_gb_ACD57511_1 | 0.136 | 37 | 0.114 | 26 | 0.153 | 23 | 0.115 | 0.114 | N | 0.51 | SignalP-TM   |
| gj_188519567_gb_ACD57512_1 | 0.14  | 33 | 0.125 | 33 | 0.271 | 6  | 0.122 | 0.124 | N | 0.57 | SignalP-noTM |
| gj_188519568_gb_ACD57513_1 | 0.131 | 43 | 0.129 | 28 | 0.203 | 25 | 0.138 | 0.132 | N | 0.51 | SignalP-TM   |
| gj_188519569_gb_ACD57514_1 | 0.1   | 68 | 0.103 | 43 | 0.124 | 35 | 0.096 | 0.1   | N | 0.57 | SignalP-noTM |
| gj_188519570_gb_ACD57515_1 | 0.121 | 24 | 0.167 | 11 | 0.327 | 1  | 0.279 | 0.219 | N | 0.57 | SignalP-noTM |
| gj_188519572_gb_ACD57517_1 | 0.112 | 24 | 0.146 | 11 | 0.251 | 1  | 0.21  | 0.176 | N | 0.57 | SignalP-noTM |
| gj_188519574_gb_ACD57519_1 | 0.124 | 40 | 0.124 | 40 | 0.184 | 35 | 0.127 | 0.125 | N | 0.51 | SignalP-TM   |
| gj_188519575_gb_ACD57520_1 | 0.578 | 22 | 0.697 | 22 | 0.905 | 15 | 0.839 | 0.764 | Y | 0.57 | SignalP-noTM |
| gj_188519576_gb_ACD57521_1 | 0.164 | 22 | 0.267 | 22 | 0.749 | 10 | 0.496 | 0.375 | N | 0.57 | SignalP-noTM |
| gj_188519577_gb_ACD57522_1 | 0.108 | 32 | 0.101 | 47 | 0.118 | 34 | 0.091 | 0.097 | N | 0.57 | SignalP-noTM |
| gj_188519580_gb_ACD57525_1 | 0.198 | 39 | 0.135 | 39 | 0.115 | 55 | 0.092 | 0.115 | N | 0.57 | SignalP-noTM |
| gj_188519581_gb_ACD57526_1 | 0.142 | 29 | 0.214 | 22 | 0.443 | 18 | 0.363 | 0.269 | N | 0.51 | SignalP-TM   |
| gj_188519582_gb_ACD57527_1 | 0.381 | 23 | 0.458 | 23 | 0.716 | 8  | 0.588 | 0.506 | N | 0.51 | SignalP-TM   |
| gj_188519583_gb_ACD57528_1 | 0.134 | 23 | 0.102 | 54 | 0.109 | 69 | 0.073 | 0.088 | N | 0.57 | SignalP-noTM |
| gj_188519584_gb_ACD57529_1 | 0.11  | 51 | 0.109 | 15 | 0.139 | 8  | 0.114 | 0.111 | N | 0.57 | SignalP-noTM |
| gj_188519585_gb_ACD57530_1 | 0.214 | 42 | 0.144 | 42 | 0.133 | 39 | 0.105 | 0.126 | N | 0.57 | SignalP-noTM |
| gj_188519587_gb_ACD57532_1 | 0.115 | 25 | 0.219 | 25 | 0.633 | 24 | 0.408 | 0.308 | N | 0.57 | SignalP-noTM |
| gj_188519588_gb_ACD57533_1 | 0.139 | 26 | 0.346 | 26 | 0.917 | 16 | 0.858 | 0.586 | Y | 0.57 | SignalP-noTM |
| gj_188519592_gb_ACD57537_1 | 0.115 | 19 | 0.117 | 48 | 0.146 | 40 | 0.107 | 0.112 | N | 0.57 | SignalP-noTM |
| gj_188519595_gb_ACD57540_1 | 0.162 | 51 | 0.124 | 14 | 0.183 | 5  | 0.15  | 0.134 | N | 0.51 | SignalP-TM   |
| gj_188519596_gb_ACD57541_1 | 0.136 | 23 | 0.115 | 23 | 0.158 | 41 | 0.094 | 0.105 | N | 0.57 | SignalP-noTM |
| gj_188519597_gb_ACD57542_1 | 0.116 | 42 | 0.111 | 42 | 0.12  | 38 | 0.086 | 0.099 | N | 0.57 | SignalP-noTM |
| gj_188519598_gb_ACD57543_1 | 0.131 | 61 | 0.192 | 14 | 0.456 | 9  | 0.363 | 0.272 | N | 0.57 | SignalP-noTM |
| gj_188519599_gb_ACD57544_1 | 0.16  | 24 | 0.117 | 24 | 0.185 | 1  | 0.094 | 0.106 | N | 0.57 | SignalP-noTM |
| gj_188519600_gb_ACD57545_1 | 0.103 | 49 | 0.108 | 35 | 0.157 | 1  | 0.11  | 0.109 | N | 0.57 | SignalP-noTM |
| gj_188519602_gb_ACD57547_1 | 0.131 | 41 | 0.146 | 11 | 0.246 | 1  | 0.213 | 0.177 | N | 0.57 | SignalP-noTM |
| gj_188519603_gb_ACD57548_1 | 0.136 | 6  | 0.121 | 15 | 0.182 | 10 | 0.146 | 0.13  | N | 0.51 | SignalP-TM   |
| gj_188519604_gb_ACD57549_1 | 0.129 | 30 | 0.144 | 12 | 0.261 | 2  | 0.221 | 0.173 | N | 0.51 | SignalP-TM   |
| gj_188519605_gb_ACD57550_1 | 0.112 | 47 | 0.12  | 17 | 0.178 | 7  | 0.135 | 0.125 | N | 0.51 | SignalP-TM   |
| gj_188519606_gb_ACD57551_1 | 0.174 | 42 | 0.167 | 42 | 0.213 | 32 | 0.115 | 0.148 | N | 0.51 | SignalP-TM   |
| gj_188519607_gb_ACD57552_1 | 0.101 | 66 | 0.11  | 28 | 0.139 | 19 | 0.105 | 0.107 | N | 0.57 | SignalP-noTM |
| gj_188519608_gb_ACD57553_1 | 0.148 | 9  | 0.106 | 63 | 0.142 | 1  | 0.097 | 0.102 | N | 0.57 | SignalP-noTM |
| gj_188519609_gb_ACD57554_1 | 0.143 | 45 | 0.121 | 45 | 0.122 | 41 | 0.094 | 0.108 | N | 0.57 | SignalP-noTM |
| gj_188519610_gb_ACD57555_1 | 0.126 | 34 | 0.119 | 11 | 0.193 | 1  | 0.139 | 0.128 | N | 0.57 | SignalP-noTM |
| gj_188519611_gb_ACD57556_1 | 0.105 | 20 | 0.107 | 33 | 0.125 | 30 | 0.092 | 0.1   | N | 0.57 | SignalP-noTM |

|          |          |          |          |                            |
|----------|----------|----------|----------|----------------------------|
| 0.064044 | 0.041091 | 0.126861 | 0.077332 | gj_188519476_gb_ACD57421_1 |
| 0.148932 | 0.102293 | 0.195289 | 0.148838 | gj_188519477_gb_ACD57422_1 |
| 0.117845 | 0.057055 | 0.124881 | 0.099927 | gj_188519484_gb_ACD57429_1 |
| 0.074675 | 0.827641 | 0.165619 | 0.355978 | gj_188519485_gb_ACD57430_1 |
| 0.916827 | 0.989207 | 0.894919 | 0.933651 | gj_188519486_gb_ACD57431_1 |
| 0.071625 | 0.071226 | 0.077629 | 0.073493 | gj_188519488_gb_ACD57433_1 |
| 0.657238 | 0.114457 | 0.617039 | 0.462911 | gj_188519489_gb_ACD57434_1 |
| 0.93738  | 0.985443 | 0.818474 | 0.912566 | gj_188519496_gb_ACD57441_1 |
| 0.049642 | 0.01904  | 0.080468 | 0.049717 | gj_188519502_gb_ACD57447_1 |
| 0.157493 | 0.105931 | 0.124227 | 0.129217 | gj_188519503_gb_ACD57448_1 |
| 0.197658 | 0.066795 | 0.183772 | 0.149408 | gj_188519505_gb_ACD57450_1 |
| 0.426291 | 0.981072 | 0.387935 | 0.598433 | gj_188519506_gb_ACD57451_1 |
| 0.062797 | 0.019436 | 0.09104  | 0.057758 | gj_188519507_gb_ACD57452_1 |
| 0.152387 | 0.100652 | 0.122282 | 0.125107 | gj_188519508_gb_ACD57453_1 |
| 0.084788 | 0.008187 | 0.107647 | 0.066874 | gj_188519509_gb_ACD57454_1 |
| 0.097969 | 0.191081 | 0.086432 | 0.125161 | gj_188519510_gb_ACD57455_1 |
| 0.093046 | 0.002091 | 0.184673 | 0.09327  | gj_188519511_gb_ACD57456_1 |
| 0.218915 | 0.942945 | 0.096651 | 0.419504 | gj_188519513_gb_ACD57458_1 |
| 0.938946 | 0.999741 | 0.888251 | 0.942313 | gj_188519514_gb_ACD57459_1 |
| 0.293385 | 0.06717  | 0.326073 | 0.228876 | gj_188519518_gb_ACD57463_1 |
| 0.120999 | 0.000934 | 0.200047 | 0.107327 | gj_188519519_gb_ACD57464_1 |
| 0.129544 | 0.235772 | 0.140035 | 0.16845  | gj_188519520_gb_ACD57465_1 |
| 0.250678 | 0.053151 | 0.30789  | 0.203906 | gj_188519522_gb_ACD57467_1 |
| 0.092038 | 0.425557 | 0.196708 | 0.238101 | gj_188519524_gb_ACD57469_1 |
| 0.081137 | 0.833966 | 0.165619 | 0.360241 | gj_188519530_gb_ACD57475_1 |
| 0.087864 | 0.064044 | 0.128869 | 0.093592 | gj_188519532_gb_ACD57477_1 |
| 0.851448 | 0.995938 | 0.832716 | 0.893367 | gj_188519535_gb_ACD57480_1 |
| 0.098767 | 0.041091 | 0.110563 | 0.083474 | gj_188519536_gb_ACD57481_1 |
| 0.902031 | 0.999587 | 0.61491  | 0.838843 | gj_188519539_gb_ACD57484_1 |
| 0.165205 | 0.065681 | 0.130562 | 0.120483 | gj_188519541_gb_ACD57486_1 |
| 0.076139 | 0.002517 | 0.134354 | 0.071003 | gj_188519542_gb_ACD57487_1 |
| 0.497    | 0.025382 | 0.663962 | 0.395448 | gj_188519543_gb_ACD57488_1 |
| 0.212822 | 0.921507 | 0.110563 | 0.414964 | gj_188519545_gb_ACD57490_1 |
| 0.923225 | 0.       |          |          |                            |

|                            |       |    |       |    |       |    |       |       |   |      |              |
|----------------------------|-------|----|-------|----|-------|----|-------|-------|---|------|--------------|
| gj_188519612_gb_ACD57557_1 | 0.141 | 21 | 0.202 | 11 | 0.571 | 3  | 0.403 | 0.297 | N | 0.57 | SignalP-noTM |
| gj_188519613_gb_ACD57558_1 | 0.228 | 38 | 0.301 | 38 | 0.9   | 37 | 0.347 | 0.322 | N | 0.57 | SignalP-noTM |
| gj_188519614_gb_ACD57559_1 | 0.136 | 33 | 0.113 | 33 | 0.145 | 46 | 0.087 | 0.101 | N | 0.57 | SignalP-noTM |
| gj_188519615_gb_ACD57560_1 | 0.188 | 65 | 0.386 | 25 | 0.969 | 20 | 0.91  | 0.632 | Y | 0.57 | SignalP-noTM |
| gj_188519617_gb_ACD57562_1 | 0.474 | 21 | 0.668 | 21 | 0.972 | 19 | 0.945 | 0.799 | Y | 0.57 | SignalP-noTM |
| gj_188519618_gb_ACD57563_1 | 0.177 | 22 | 0.161 | 38 | 0.202 | 36 | 0.127 | 0.149 | N | 0.51 | SignalP-TM   |
| gj_188519619_gb_ACD57564_1 | 0.109 | 40 | 0.103 | 40 | 0.118 | 52 | 0.084 | 0.094 | N | 0.57 | SignalP-noTM |
| gj_188519620_gb_ACD57565_1 | 0.119 | 26 | 0.111 | 34 | 0.144 | 1  | 0.096 | 0.104 | N | 0.57 | SignalP-noTM |
| gj_188519621_gb_ACD57566_1 | 0.104 | 41 | 0.109 | 57 | 0.147 | 33 | 0.098 | 0.104 | N | 0.57 | SignalP-noTM |
| gj_188519622_gb_ACD57567_1 | 0.421 | 21 | 0.609 | 21 | 0.952 | 17 | 0.871 | 0.732 | Y | 0.57 | SignalP-noTM |
| gj_188519624_gb_ACD57569_1 | 0.215 | 23 | 0.159 | 23 | 0.223 | 41 | 0.116 | 0.139 | N | 0.57 | SignalP-noTM |
| gj_188519625_gb_ACD57570_1 | 0.124 | 29 | 0.109 | 64 | 0.109 | 66 | 0.088 | 0.099 | N | 0.57 | SignalP-noTM |
| gj_188519626_gb_ACD57571_1 | 0.202 | 38 | 0.181 | 19 | 0.256 | 34 | 0.194 | 0.187 | N | 0.57 | SignalP-noTM |
| gj_188519627_gb_ACD57572_1 | 0.117 | 29 | 0.146 | 11 | 0.281 | 3  | 0.215 | 0.179 | N | 0.57 | SignalP-noTM |
| gj_188519628_gb_ACD57573_1 | 0.105 | 24 | 0.131 | 11 | 0.289 | 1  | 0.157 | 0.143 | N | 0.57 | SignalP-noTM |
| gj_188519629_gb_ACD57574_1 | 0.164 | 60 | 0.124 | 60 | 0.172 | 15 | 0.092 | 0.109 | N | 0.57 | SignalP-noTM |
| gj_188519630_gb_ACD57575_1 | 0.341 | 21 | 0.513 | 21 | 0.897 | 1  | 0.814 | 0.654 | Y | 0.57 | SignalP-noTM |
| gj_188519631_gb_ACD57576_1 | 0.795 | 25 | 0.814 | 25 | 0.942 | 9  | 0.876 | 0.843 | Y | 0.57 | SignalP-noTM |
| gj_188519632_gb_ACD57577_1 | 0.312 | 18 | 0.223 | 18 | 0.268 | 5  | 0.179 | 0.203 | N | 0.57 | SignalP-noTM |
| gj_188519633_gb_ACD57578_1 | 0.148 | 42 | 0.123 | 42 | 0.177 | 15 | 0.112 | 0.119 | N | 0.51 | SignalP-TM   |
| gj_188519635_gb_ACD57580_1 | 0.883 | 26 | 0.89  | 26 | 0.962 | 11 | 0.919 | 0.904 | Y | 0.57 | SignalP-noTM |
| gj_188519636_gb_ACD57581_1 | 0.138 | 40 | 0.165 | 40 | 0.316 | 32 | 0.145 | 0.158 | N | 0.51 | SignalP-TM   |
| gj_188519637_gb_ACD57582_1 | 0.123 | 21 | 0.124 | 21 | 0.196 | 14 | 0.114 | 0.119 | N | 0.57 | SignalP-noTM |
| gj_188519638_gb_ACD57583_1 | 0.108 | 24 | 0.093 | 70 | 0.096 | 69 | 0.073 | 0.084 | N | 0.57 | SignalP-noTM |
| gj_188519639_gb_ACD57584_1 | 0.122 | 37 | 0.165 | 15 | 0.32  | 4  | 0.263 | 0.211 | N | 0.57 | SignalP-noTM |
| gj_188519641_gb_ACD57586_1 | 0.123 | 21 | 0.121 | 57 | 0.184 | 51 | 0.081 | 0.102 | N | 0.57 | SignalP-noTM |
| gj_188519643_gb_ACD57588_1 | 0.411 | 21 | 0.358 | 21 | 0.512 | 16 | 0.275 | 0.319 | N | 0.57 | SignalP-noTM |
| gj_188519645_gb_ACD57590_1 | 0.106 | 39 | 0.114 | 11 | 0.246 | 1  | 0.191 | 0.164 | N | 0.57 | SignalP-noTM |
| gj_188519647_gb_ACD57592_1 | 0.104 | 31 | 0.106 | 58 | 0.123 | 39 | 0.091 | 0.099 | N | 0.57 | SignalP-noTM |
| gj_188519648_gb_ACD57593_1 | 0.149 | 45 | 0.149 | 11 | 0.317 | 2  | 0.23  | 0.187 | N | 0.57 | SignalP-noTM |
| gj_528897472_gb_AGS47849_1 | 0.116 | 18 | 0.146 | 12 | 0.324 | 1  | 0.202 | 0.173 | N | 0.57 | SignalP-noTM |
| gj_188519649_gb_ACD57594_1 | 0.166 | 51 | 0.166 | 51 | 0.366 | 1  | 0.153 | 0.161 | N | 0.51 | SignalP-TM   |
| gj_188519650_gb_ACD57595_1 | 0.115 | 34 | 0.109 | 58 | 0.143 | 5  | 0.095 | 0.102 | N | 0.57 | SignalP-noTM |
| gj_188519652_gb_ACD57597_1 | 0.139 | 46 | 0.116 | 70 | 0.153 | 13 | 0.079 | 0.102 | N | 0.51 | SignalP-TM   |
| gj_188519653_gb_ACD57598_1 | 0.114 | 33 | 0.136 | 12 | 0.241 | 3  | 0.188 | 0.161 | N | 0.57 | SignalP-noTM |
| gj_188519654_gb_ACD57599_1 | 0.141 | 38 | 0.128 | 38 | 0.133 | 29 | 0.103 | 0.116 | N | 0.57 | SignalP-noTM |
| gj_188519655_gb_ACD57600_1 | 0.177 | 40 | 0.139 | 40 | 0.183 | 26 | 0.113 | 0.127 | N | 0.57 | SignalP-noTM |
| gj_188519660_gb_ACD57605_1 | 0.152 | 27 | 0.149 | 27 | 0.222 | 32 | 0.134 | 0.142 | N | 0.57 | SignalP-noTM |
| gj_188519662_gb_ACD57607_1 | 0.122 | 31 | 0.146 | 11 | 0.316 | 1  | 0.203 | 0.173 | N | 0.57 | SignalP-noTM |
| gj_188519665_gb_ACD57610_1 | 0.125 | 20 | 0.145 | 20 | 0.211 | 17 | 0.154 | 0.15  | N | 0.57 | SignalP-noTM |
| gj_188519669_gb_ACD57614_1 | 0.105 | 45 | 0.105 | 51 | 0.184 | 42 | 0.087 | 0.096 | N | 0.57 | SignalP-noTM |
| gj_188519676_gb_ACD57621_1 | 0.106 | 22 | 0.103 | 64 | 0.126 | 1  | 0.094 | 0.098 | N | 0.57 | SignalP-noTM |
| gj_188519677_gb_ACD57622_1 | 0.168 | 27 | 0.169 | 35 | 0.37  | 34 | 0.167 | 0.168 | N | 0.57 | SignalP-noTM |
| gj_188519684_gb_ACD57629_1 | 0.113 | 53 | 0.114 | 53 | 0.127 | 49 | 0.086 | 0.101 | N | 0.57 | SignalP-noTM |
| gj_188519687_gb_ACD57632_1 | 0.131 | 8  | 0.099 | 33 | 0.12  | 6  | 0.091 | 0.095 | N | 0.57 | SignalP-noTM |
| gj_188519688_gb_ACD57633_1 | 0.183 | 26 | 0.275 | 26 | 0.615 | 3  | 0.487 | 0.375 | N | 0.57 | SignalP-noTM |
| gj_188519691_gb_ACD57636_1 | 0.102 | 35 | 0.102 | 35 | 0.119 | 13 | 0.093 | 0.098 | N | 0.57 | SignalP-noTM |
| gj_188519693_gb_ACD57638_1 | 0.606 | 32 | 0.644 | 26 | 0.881 | 12 | 0.768 | 0.703 | Y | 0.57 | SignalP-noTM |
| gj_188519696_gb_ACD57641_1 | 0.128 | 27 | 0.136 | 12 | 0.217 | 6  | 0.187 | 0.16  | N | 0.57 | SignalP-noTM |
| gj_188519697_gb_ACD57642_1 | 0.274 | 25 | 0.175 | 25 | 0.217 | 23 | 0.108 | 0.143 | N | 0.57 | SignalP-noTM |
| gj_188519699_gb_ACD57644_1 | 0.102 | 24 | 0.098 | 38 | 0.102 | 33 | 0.073 | 0.086 | N | 0.57 | SignalP-noTM |
| gj_188519700_gb_ACD57645_1 | 0.114 | 43 | 0.106 | 12 | 0.143 | 3  | 0.113 | 0.109 | N | 0.57 | SignalP-noTM |
| gj_188519702_gb_ACD57647_1 | 0.213 | 37 | 0.143 | 37 | 0.189 | 45 | 0.088 | 0.117 | N | 0.57 | SignalP-noTM |
| gj_188519704_gb_ACD57649_1 | 0.219 | 39 | 0.194 | 39 | 0.489 | 38 | 0.123 | 0.116 | N | 0.57 | SignalP-noTM |
| gj_188519705_gb_ACD57650_1 | 0.184 | 56 | 0.164 | 31 | 0.291 | 29 | 0.133 | 0.153 | N | 0.51 | SignalP-TM   |
| gj_188519706_gb_ACD57651_1 | 0.179 | 26 | 0.239 | 26 | 0.385 | 15 | 0.292 | 0.259 | N | 0.51 | SignalP-TM   |
| gj_188519709_gb_ACD57654_1 | 0.807 | 27 | 0.818 | 27 | 0.954 | 13 | 0.88  | 0.847 | Y | 0.57 | SignalP-noTM |
| gj_188519711_gb_ACD57656_1 | 0.172 | 14 | 0.363 | 14 | 0.853 | 13 | 0.767 | 0.553 | N | 0.57 | SignalP-noTM |
| gj_188519712_gb_ACD57657_1 | 0.108 | 24 | 0.107 | 57 | 0.115 | 54 | 0.091 | 0.099 | N | 0.57 | SignalP-noTM |
| gj_188519713_gb_ACD57658_1 | 0.129 | 18 | 0.14  | 18 | 0.206 | 9  | 0.154 | 0.147 | N | 0.57 | SignalP-noTM |
| gj_188519714_gb_ACD57659_1 | 0.11  | 43 | 0.132 | 12 | 0.206 | 9  | 0.178 | 0.154 | N | 0.57 | SignalP-noTM |
| gj_188519715_gb_ACD57660_1 | 0.248 | 20 | 0.195 | 20 | 0.196 | 12 | 0.148 | 0.173 | N | 0.57 | SignalP-noTM |
| gj_188519716_gb_ACD57661_1 | 0.113 | 20 | 0.113 | 30 | 0.186 | 27 | 0.095 | 0.105 | N | 0.57 | SignalP-noTM |
| gj_188519718_gb_ACD57663_1 | 0.272 | 64 | 0.199 | 64 | 0.29  | 53 | 0.118 | 0.161 | N | 0.57 | SignalP-noTM |
| gj_188519719_gb_ACD57664_1 | 0.121 | 67 | 0.106 | 32 | 0.135 | 1  | 0.097 | 0.102 | N | 0.57 | SignalP-noTM |
| gj_188519720_gb_ACD57665_1 | 0.221 | 40 | 0.188 | 40 | 0.259 | 2  | 0.171 | 0.18  | N | 0.57 | SignalP-noTM |
| gj_188519721_gb_ACD57666_1 | 0.142 | 43 | 0.177 | 43 | 0.34  | 42 | 0.165 | 0.171 | N | 0.57 | SignalP-noTM |
| gj_188519722_gb_ACD57667_1 | 0.143 | 20 | 0.171 | 20 | 0.297 | 1  | 0.216 | 0.192 | N | 0.57 | SignalP-noTM |
| gj_188519723_gb_ACD57668_1 | 0.189 | 43 | 0.201 | 43 | 0.469 | 3  | 0.202 | 0.202 | N | 0.51 | SignalP-TM   |
| gj_188519724_gb_ACD57669_1 | 0.244 | 27 | 0.2   | 27 | 0.353 | 11 | 0.194 | 0.197 | N | 0.57 | SignalP-noTM |
| gj_188519725_gb_ACD57670_1 | 0.116 | 29 | 0.171 | 29 | 0.381 | 26 | 0.218 | 0.193 | N | 0.57 | SignalP-noTM |
| gj_188519726_gb_ACD57671_1 | 0.107 | 41 | 0.108 | 28 | 0.127 | 20 | 0.086 | 0.098 | N | 0.57 | SignalP-noTM |
| gj_188519728_gb_ACD57673_1 | 0.169 | 55 | 0.122 | 55 | 0.112 | 23 | 0.09  | 0.107 | N | 0.57 | SignalP-noTM |
| gj_188519729_gb_ACD57674_1 | 0.368 | 23 | 0.401 | 23 | 0.649 | 22 | 0.397 | 0.4   | N | 0.51 | SignalP-TM   |
| gj_188519730_gb_ACD57675_1 | 0.165 | 24 | 0.166 | 24 | 0.318 | 22 | 0.139 | 0.156 | N | 0.51 | SignalP-TM   |
| gj_188519731_gb_ACD57676_1 | 0.447 | 67 | 0.243 | 67 | 0.187 | 55 | 0.106 | 0.192 | N | 0.51 | SignalP-TM   |
| gj_188519732_gb_ACD57677_1 | 0.127 | 42 | 0.137 | 11 | 0.301 | 1  | 0.177 | 0.152 | N | 0.51 | SignalP-TM   |
| gj_188519733_gb_ACD57678_1 | 0.161 | 40 | 0.125 | 40 | 0.135 | 44 | 0.088 | 0.107 | N | 0.57 | SignalP-noTM |

|          |          |          |          |                            |
|----------|----------|----------|----------|----------------------------|
| 0.698465 | 0.94131  | 0.776433 | 0.805403 | gj_188519612_gb_ACD57557_1 |
| 0.913093 | 0.990185 | 0.804239 | 0.902506 | gj_188519613_gb_ACD57558_1 |
| 0.272693 | 0.414595 | 0.331369 | 0.339552 | gj_188519614_gb_ACD57559_1 |
| 0.954696 | 0.99976  | 0.890025 | 0.94816  | gj_188519615_gb_ACD57560_1 |
| 0.923438 | 0.686972 | 0.871804 | 0.827405 | gj_188519617_gb_ACD57562_1 |
| 0.956353 | 0.99857  | 0.91117  | 0.955793 | gj_188519618_gb_ACD57563_1 |
| 0.458609 | 0.160704 | 0.508999 | 0.375437 | gj_188519619_gb_ACD57564_1 |
| 0.090545 | 0.107936 | 0.109975 | 0.102819 | gj_188519620_gb_ACD57565_1 |
| 0.490251 | 0.185126 | 0.491001 | 0.388793 | gj_188519621_gb_ACD57566_1 |
| 0.647028 | 0.78313  | 0.692748 | 0.707635 | gj_188519622_gb_ACD57567_1 |
| 0.089317 | 0.050931 | 0.082716 | 0.074321 | gj_188519624_gb_ACD57569_1 |
| 0.151614 | 0.02401  | 0.17023  | 0.115285 | gj_188519625_gb_ACD57570_1 |
| 0.163147 | 0.022183 | 0.135404 | 0.106911 | gj_188519626_gb_ACD57571_1 |
| 0.228818 | 0.4985   | 0.165205 | 0.297508 | gj_188519627_gb_ACD57572_1 |
| 0.844093 | 0.985867 | 0.850687 | 0.893549 | gj_188519628_gb_ACD57573_1 |
| 0.133658 | 0.024435 | 0.210818 | 0.12297  | gj_188519629_gb_ACD57574_1 |
| 0.90016  | 0.985006 | 0.929367 | 0.938178 | gj_188519630_gb_ACD57575_1 |
| 0.791666 | 0.371684 | 0.867381 | 0.67691  | gj_188519631_gb_ACD57576_1 |
| 0.237398 | 0.135404 | 0.290285 | 0.221029 | gj_188519632_gb_ACD57577_1 |
| 0.191081 | 0.016774 | 0.24453  | 0.150795 | gj_188519633_gb_ACD57578_1 |
| 0.942133 | 0.998487 | 0.917056 | 0.952559 | gj_188519635_gb_ACD57580_1 |
| 0.179314 | 0.075508 | 0.166866 | 0.140563 | gj_188519636_gb_ACD57581_1 |
| 0.080247 | 0.060711 | 0.084788 | 0.075249 | gj_188519637_gb_ACD57582_1 |
| 0.074675 | 0.04004  | 0.117845 | 0.07752  | gj_188519638_gb_ACD57583_1 |
| 0.178873 | 0.022165 | 0.20538  | 0.135139 | gj_188519639_gb_ACD57584_1 |
| 0.125209 | 0.102018 | 0.128869 | 0.118699 | gj_188519641_gb_ACD57586_1 |
| 0.129206 | 0.008689 | 0.128869 | 0.088921 | gj_188519643_gb_ACD57588_1 |
| 0.461079 | 0.945474 | 0.705993 | 0.704182 | gj_188519645_gb_ACD57590_1 |
| 0.925117 | 0.895762 | 0.876749 | 0.899209 | gj_188519647_gb_ACD57592_1 |
| 0.311096 | 0.051661 | 0.449376 | 0.270644 | gj_188519648_gb_ACD57593_1 |
| 0.143687 | 0.117845 | 0.206361 | 0.155964 | gj_188519649_gb_ACD57594_1 |
| 0.129882 | 0.040855 | 0.122927 | 0.097888 | gj_188519650_gb_ACD57595_1 |
| 0.061572 | 0.803292 | 0.175375 | 0.346746 | gj_188519652_gb_ACD57597_1 |
|          |          |          |          |                            |

|                             |       |    |       |    |       |    |       |       |   |      |              |  |
|-----------------------------|-------|----|-------|----|-------|----|-------|-------|---|------|--------------|--|
| gi_188519734_gb_ACD576791_1 | 0.112 | 29 | 0.105 | 67 | 0.156 | 1  | 0.096 | 0.1   | N | 0.57 | SignalP-noTM |  |
| gi_188519739_gb_ACD576841_1 | 0.115 | 52 | 0.104 | 70 | 0.124 | 8  | 0.091 | 0.098 | N | 0.57 | SignalP-noTM |  |
| gi_188519741_gb_ACD576861_1 | 0.13  | 29 | 0.146 | 11 | 0.292 | 2  | 0.219 | 0.181 | N | 0.57 | SignalP-noTM |  |
| gi_188519742_gb_ACD576871_1 | 0.108 | 35 | 0.109 | 35 | 0.131 | 32 | 0.095 | 0.103 | N | 0.57 | SignalP-noTM |  |
| gi_188519743_gb_ACD576881_1 | 0.305 | 18 | 0.285 | 18 | 0.678 | 1  | 0.35  | 0.309 | N | 0.51 | SignalP-TM   |  |
| gi_188519744_gb_ACD576891_1 | 0.158 | 37 | 0.191 | 14 | 0.417 | 11 | 0.375 | 0.259 | N | 0.51 | SignalP-TM   |  |
| gi_188519745_gb_ACD576901_1 | 0.17  | 58 | 0.155 | 11 | 0.412 | 1  | 0.272 | 0.186 | N | 0.57 | SignalP-noTM |  |
| gi_188519746_gb_ACD576911_1 | 0.125 | 19 | 0.153 | 19 | 0.392 | 12 | 0.185 | 0.168 | N | 0.57 | SignalP-noTM |  |
| gi_188519747_gb_ACD576921_1 | 0.179 | 30 | 0.12  | 46 | 0.163 | 42 | 0.082 | 0.106 | N | 0.51 | SignalP-TM   |  |
| gi_188519748_gb_ACD576931_1 | 0.152 | 47 | 0.146 | 47 | 0.179 | 40 | 0.095 | 0.128 | N | 0.51 | SignalP-TM   |  |
| gi_188519749_gb_ACD576941_1 | 0.296 | 19 | 0.236 | 19 | 0.333 | 30 | 0.179 | 0.209 | N | 0.57 | SignalP-noTM |  |
| gi_188519750_gb_ACD576951_1 | 0.118 | 49 | 0.133 | 49 | 0.214 | 9  | 0.141 | 0.137 | N | 0.57 | SignalP-noTM |  |
| gi_188519751_gb_ACD576961_1 | 0.145 | 52 | 0.158 | 12 | 0.345 | 6  | 0.256 | 0.204 | N | 0.57 | SignalP-noTM |  |
| gi_188519752_gb_ACD576971_1 | 0.497 | 24 | 0.338 | 24 | 0.467 | 1  | 0.295 | 0.322 | N | 0.51 | SignalP-TM   |  |
| gi_188519753_gb_ACD576981_1 | 0.169 | 23 | 0.158 | 23 | 0.222 | 22 | 0.147 | 0.153 | N | 0.57 | SignalP-noTM |  |
| gi_188519754_gb_ACD576991_1 | 0.107 | 22 | 0.11  | 33 | 0.158 | 12 | 0.109 | 0.11  | N | 0.57 | SignalP-noTM |  |
| gi_188519755_gb_ACD577001_1 | 0.104 | 25 | 0.162 | 11 | 0.374 | 1  | 0.244 | 0.201 | N | 0.57 | SignalP-noTM |  |
| gi_188519757_gb_ACD577021_1 | 0.121 | 52 | 0.209 | 16 | 0.477 | 10 | 0.398 | 0.279 | N | 0.51 | SignalP-TM   |  |
| gi_188519758_gb_ACD577031_1 | 0.112 | 70 | 0.139 | 16 | 0.249 | 7  | 0.18  | 0.158 | N | 0.57 | SignalP-noTM |  |
| gi_188519759_gb_ACD577041_1 | 0.117 | 20 | 0.119 | 20 | 0.17  | 10 | 0.114 | 0.117 | N | 0.57 | SignalP-noTM |  |
| gi_188519760_gb_ACD577051_1 | 0.102 | 18 | 0.121 | 11 | 0.205 | 1  | 0.139 | 0.13  | N | 0.57 | SignalP-noTM |  |
| gi_188519761_gb_ACD577061_1 | 0.111 | 3  | 0.172 | 11 | 0.449 | 1  | 0.278 | 0.222 | N | 0.57 | SignalP-noTM |  |
| gi_188519765_gb_ACD577101_1 | 0.111 | 33 | 0.104 | 33 | 0.119 | 50 | 0.081 | 0.093 | N | 0.57 | SignalP-noTM |  |
| gi_188519766_gb_ACD577111_1 | 0.239 | 23 | 0.459 | 23 | 0.954 | 7  | 0.905 | 0.669 | Y | 0.57 | SignalP-noTM |  |
| gi_188519768_gb_ACD577131_1 | 0.113 | 38 | 0.152 | 27 | 0.293 | 21 | 0.184 | 0.167 | N | 0.57 | SignalP-noTM |  |
| gi_188519770_gb_ACD577151_1 | 0.115 | 59 | 0.114 | 11 | 0.24  | 1  | 0.116 | 0.115 | N | 0.57 | SignalP-noTM |  |
| gi_188519772_gb_ACD577171_1 | 0.102 | 34 | 0.105 | 67 | 0.12  | 1  | 0.082 | 0.094 | N | 0.57 | SignalP-noTM |  |
| gi_188519773_gb_ACD577181_1 | 0.103 | 23 | 0.122 | 12 | 0.175 | 4  | 0.149 | 0.135 | N | 0.57 | SignalP-noTM |  |
| gi_188519774_gb_ACD577191_1 | 0.173 | 40 | 0.174 | 40 | 0.456 | 38 | 0.213 | 0.193 | N | 0.57 | SignalP-noTM |  |
| gi_188519776_gb_ACD577211_1 | 0.151 | 39 | 0.127 | 11 | 0.204 | 6  | 0.166 | 0.145 | N | 0.57 | SignalP-noTM |  |
| gi_188519777_gb_ACD577221_1 | 0.26  | 38 | 0.364 | 38 | 0.573 | 34 | 0.273 | 0.321 | N | 0.57 | SignalP-noTM |  |
| gi_188519779_gb_ACD577241_1 | 0.104 | 25 | 0.195 | 13 | 0.511 | 10 | 0.382 | 0.283 | N | 0.57 | SignalP-noTM |  |
| gi_188519780_gb_ACD577251_1 | 0.208 | 31 | 0.152 | 31 | 0.207 | 1  | 0.104 | 0.129 | N | 0.57 | SignalP-noTM |  |
| gi_188519781_gb_ACD577261_1 | 0.112 | 17 | 0.108 | 17 | 0.146 | 8  | 0.1   | 0.104 | N | 0.57 | SignalP-noTM |  |
| gi_188519785_gb_ACD577301_1 | 0.437 | 26 | 0.637 | 26 | 0.979 | 13 | 0.946 | 0.782 | Y | 0.57 | SignalP-noTM |  |
| gi_188519786_gb_ACD577311_1 | 0.183 | 57 | 0.15  | 57 | 0.247 | 50 | 0.081 | 0.117 | N | 0.57 | SignalP-noTM |  |
| gi_188519788_gb_ACD577331_1 | 0.279 | 26 | 0.272 | 26 | 0.556 | 37 | 0.239 | 0.256 | N | 0.57 | SignalP-noTM |  |
| gi_188519789_gb_ACD577341_1 | 0.156 | 31 | 0.201 | 18 | 0.368 | 1  | 0.292 | 0.244 | N | 0.57 | SignalP-noTM |  |
| gi_188519792_gb_ACD577371_1 | 0.151 | 23 | 0.26  | 13 | 0.749 | 9  | 0.69  | 0.462 | N | 0.57 | SignalP-noTM |  |
| gi_188519796_gb_ACD577411_1 | 0.113 | 7  | 0.1   | 63 | 0.105 | 61 | 0.084 | 0.092 | N | 0.57 | SignalP-noTM |  |
| gi_188519800_gb_ACD577451_1 | 0.136 | 21 | 0.216 | 21 | 0.556 | 2  | 0.383 | 0.278 | N | 0.51 | SignalP-TM   |  |
| gi_188519801_gb_ACD577461_1 | 0.158 | 25 | 0.132 | 25 | 0.173 | 2  | 0.107 | 0.12  | N | 0.57 | SignalP-noTM |  |
| gi_188519802_gb_ACD577471_1 | 0.173 | 28 | 0.221 | 28 | 0.525 | 1  | 0.343 | 0.266 | N | 0.51 | SignalP-TM   |  |
| gi_188519809_gb_ACD577541_1 | 0.586 | 29 | 0.528 | 29 | 0.585 | 24 | 0.394 | 0.478 | N | 0.51 | SignalP-TM   |  |
| gi_188519810_gb_ACD577551_1 | 0.127 | 49 | 0.114 | 49 | 0.118 | 30 | 0.099 | 0.107 | N | 0.57 | SignalP-noTM |  |
| gi_188519811_gb_ACD577561_1 | 0.173 | 28 | 0.181 | 28 | 0.279 | 26 | 0.197 | 0.187 | N | 0.51 | SignalP-TM   |  |
| gi_188519815_gb_ACD577601_1 | 0.112 | 29 | 0.11  | 29 | 0.172 | 27 | 0.089 | 0.102 | N | 0.51 | SignalP-TM   |  |
| gi_188519816_gb_ACD577611_1 | 0.121 | 24 | 0.239 | 22 | 0.626 | 17 | 0.473 | 0.326 | N | 0.51 | SignalP-TM   |  |
| gi_188519817_gb_ACD577621_1 | 0.267 | 16 | 0.497 | 16 | 0.95  | 10 | 0.922 | 0.697 | Y | 0.57 | SignalP-noTM |  |
| gi_188519818_gb_ACD577631_1 | 0.128 | 22 | 0.103 | 22 | 0.113 | 21 | 0.08  | 0.092 | N | 0.57 | SignalP-noTM |  |
| gi_188519819_gb_ACD577641_1 | 0.145 | 22 | 0.098 | 50 | 0.119 | 1  | 0.071 | 0.088 | N | 0.51 | SignalP-TM   |  |
| gi_188519820_gb_ACD577651_1 | 0.102 | 70 | 0.105 | 49 | 0.126 | 43 | 0.091 | 0.098 | N | 0.57 | SignalP-noTM |  |
| gi_188519821_gb_ACD577661_1 | 0.111 | 34 | 0.1   | 12 | 0.121 | 6  | 0.1   | 0.1   | N | 0.51 | SignalP-TM   |  |
| gi_188519822_gb_ACD577671_1 | 0.115 | 49 | 0.126 | 55 | 0.266 | 48 | 0.11  | 0.118 | N | 0.57 | SignalP-noTM |  |
| gi_188519832_gb_ACD577771_1 | 0.352 | 23 | 0.209 | 23 | 0.213 | 20 | 0.13  | 0.18  | N | 0.51 | SignalP-TM   |  |
| gi_188519833_gb_ACD577781_1 | 0.17  | 25 | 0.225 | 25 | 0.37  | 19 | 0.271 | 0.242 | N | 0.51 | SignalP-TM   |  |
| gi_188519834_gb_ACD577791_1 | 0.11  | 36 | 0.135 | 12 | 0.261 | 3  | 0.182 | 0.158 | N | 0.57 | SignalP-noTM |  |
| gi_188519835_gb_ACD577801_1 | 0.156 | 42 | 0.146 | 42 | 0.219 | 19 | 0.143 | 0.145 | N | 0.57 | SignalP-noTM |  |
| gi_188519836_gb_ACD577811_1 | 0.116 | 41 | 0.124 | 54 | 0.17  | 49 | 0.114 | 0.119 | N | 0.57 | SignalP-noTM |  |
| gi_188519838_gb_ACD577831_1 | 0.164 | 20 | 0.156 | 20 | 0.211 | 13 | 0.133 | 0.145 | N | 0.57 | SignalP-noTM |  |
| gi_188519839_gb_ACD577841_1 | 0.12  | 27 | 0.132 | 13 | 0.218 | 3  | 0.179 | 0.154 | N | 0.57 | SignalP-noTM |  |
| gi_188519840_gb_ACD577851_1 | 0.108 | 40 | 0.116 | 19 | 0.178 | 39 | 0.132 | 0.123 | N | 0.57 | SignalP-noTM |  |
| gi_188519848_gb_ACD577931_1 | 0.493 | 29 | 0.448 | 29 | 0.692 | 23 | 0.341 | 0.408 | N | 0.51 | SignalP-TM   |  |
| gi_188519854_gb_ACD577991_1 | 0.11  | 17 | 0.119 | 11 | 0.22  | 1  | 0.13  | 0.124 | N | 0.57 | SignalP-noTM |  |
| gi_188519856_gb_ACD578011_1 | 0.111 | 9  | 0.108 | 41 | 0.124 | 62 | 0.083 | 0.096 | N | 0.57 | SignalP-noTM |  |
| gi_188519857_gb_ACD578021_1 | 0.197 | 26 | 0.193 | 26 | 0.369 | 22 | 0.219 | 0.205 | N | 0.57 | SignalP-noTM |  |
| gi_188519860_gb_ACD578051_1 | 0.261 | 28 | 0.339 | 28 | 0.649 | 13 | 0.519 | 0.423 | N | 0.57 | SignalP-noTM |  |
| gi_188519861_gb_ACD578061_1 | 0.135 | 36 | 0.147 | 18 | 0.269 | 9  | 0.201 | 0.172 | N | 0.57 | SignalP-noTM |  |
| gi_188519862_gb_ACD578071_1 | 0.174 | 62 | 0.135 | 62 | 0.184 | 51 | 0.098 | 0.118 | N | 0.57 | SignalP-noTM |  |
| gi_188519867_gb_ACD578121_1 | 0.133 | 22 | 0.158 | 22 | 0.292 | 11 | 0.194 | 0.175 | N | 0.57 | SignalP-noTM |  |
| gi_188519870_gb_ACD578151_1 | 0.188 | 31 | 0.153 | 31 | 0.186 | 26 | 0.128 | 0.141 | N | 0.57 | SignalP-noTM |  |
| gi_188519871_gb_ACD578161_1 | 0.157 | 18 | 0.125 | 18 | 0.117 | 18 | 0.097 | 0.112 | N | 0.57 | SignalP-noTM |  |
| gi_188519881_gb_ACD578261_1 | 0.117 | 67 | 0.105 | 67 | 0.106 | 69 | 0.077 | 0.092 | N | 0.57 | SignalP-noTM |  |
| gi_188519882_gb_ACD578271_1 | 0.168 | 21 | 0.143 | 21 | 0.172 | 20 | 0.116 | 0.13  | N | 0.57 | SignalP-noTM |  |
| gi_188519883_gb_ACD578281_1 | 0.115 | 32 | 0.128 | 13 | 0.193 | 2  | 0.167 | 0.146 | N | 0.57 | SignalP-noTM |  |
| gi_188519884_gb_ACD578291_1 | 0.17  | 18 | 0.128 | 18 | 0.238 | 26 | 0.102 | 0.116 | N | 0.57 | SignalP-noTM |  |
| gi_188519885_gb_ACD578301_1 | 0.102 | 48 | 0.104 | 29 | 0.133 | 1  | 0.096 | 0.1   | N | 0.57 | SignalP-noTM |  |
| gi_188519890_gb_ACD578351_1 | 0.143 | 25 | 0.16  | 23 | 0.338 | 18 | 0.188 | 0.173 | N | 0.57 | SignalP-noTM |  |

|          |          |          |          |                             |
|----------|----------|----------|----------|-----------------------------|
| 0.10011  | 0.055619 | 0.102569 | 0.086099 | gi_188519734_gb_ACD576791_1 |
| 0.128669 | 0.004918 | 0.134005 | 0.089264 | gi_188519739_gb_ACD576841_1 |
| 0.117222 | 0.022118 | 0.106215 | 0.081852 | gi_188519741_gb_ACD576861_1 |
| 0.198611 | 0.176681 | 0.262116 | 0.212469 | gi_188519742_gb_ACD576871_1 |
| 0.191545 | 0.243977 | 0.147795 | 0.194439 | gi_188519743_gb_ACD576881_1 |
| 0.913805 | 0.945936 | 0.863539 | 0.90776  | gi_188519744_gb_ACD576891_1 |
| 0.114762 | 0.001227 | 0.154335 | 0.090108 | gi_188519745_gb_ACD576901_1 |
| 0.135404 | 0.002023 | 0.208829 | 0.115419 | gi_188519746_gb_ACD576911_1 |
| 0.089806 | 0.793147 | 0.168541 | 0.350498 | gi_188519747_gb_ACD576921_1 |
| 0.074055 | 0.047426 | 0.132964 | 0.084815 | gi_188519748_gb_ACD576931_1 |
| 0.143687 | 0.057704 | 0.185579 | 0.12899  | gi_188519749_gb_ACD576941_1 |
| 0.127194 | 0.228289 | 0.112946 | 0.156143 | gi_188519750_gb_ACD576951_1 |
| 0.114153 | 0.001866 | 0.156699 | 0.090906 | gi_188519751_gb_ACD576961_1 |
| 0.291523 | 0.977882 | 0.334033 | 0.534479 | gi_188519752_gb_ACD576971_1 |
| 0.075718 | 0.031954 | 0.124553 | 0.077408 | gi_188519753_gb_ACD576981_1 |
| 0.541901 | 0.031861 | 0.574443 | 0.382735 | gi_188519754_gb_ACD576991_1 |
| 0.05869  | 0.074468 | 0.080691 | 0.071283 | gi_188519755_gb_ACD577001_1 |
| 0.757128 | 0.358473 | 0.823755 | 0.646452 | gi_188519757_gb_ACD577021_1 |
| 0.085724 | 0.016286 | 0.110563 | 0.070858 | gi_188519758_gb_ACD577031_1 |
| 0.080468 | 0.034059 | 0.117845 | 0.077457 | gi_188519759_gb_ACD577041_1 |
| 0.105647 | 0.031768 | 0.112346 | 0.083254 | gi_188519760_gb_ACD577051_1 |
| 0.804711 | 0.980449 | 0.738802 | 0.839654 | gi_188519761_gb_ACD577061_1 |
| 0.105081 | 0.002277 | 0.143687 | 0.083846 | gi_188519765_gb_ACD577101_1 |
| 0.960189 | 0.998625 | 0.910438 | 0.956417 | gi_188519766_gb_ACD577111_1 |
| 0.171079 | 0.245641 | 0.405886 | 0.274202 | gi_188519768_gb_ACD577131_1 |
| 0.058525 | 0.032704 | 0.115607 | 0.068765 | gi_188519770_gb_ACD577151_1 |
| 0.336708 | 0.281709 | 0.523982 | 0.3808   | gi_188519772_gb_ACD577171_1 |
| 0.10011  | 0.036827 | 0.077415 | 0.071451 | gi_188519773_gb_ACD577181_1 |
| 0.209235 |          |          |          |                             |

|                            |       |    |       |    |       |    |       |       |   |      |              |
|----------------------------|-------|----|-------|----|-------|----|-------|-------|---|------|--------------|
| gi_188519891_gb_ACD57836.1 | 0.116 | 63 | 0.125 | 20 | 0.187 | 17 | 0.124 | 0.125 | N | 0.57 | SignalP-noTM |
| gi_188519892_gb_ACD57837.1 | 0.168 | 22 | 0.137 | 22 | 0.173 | 32 | 0.111 | 0.127 | N | 0.51 | SignalP-TM   |
| gi_188519896_gb_ACD57841.1 | 0.164 | 33 | 0.105 | 18 | 0.153 | 15 | 0.108 | 0.106 | N | 0.51 | SignalP-TM   |
| gi_188519897_gb_ACD57842.1 | 0.254 | 21 | 0.221 | 21 | 0.262 | 20 | 0.18  | 0.206 | N | 0.51 | SignalP-TM   |
| gi_188519900_gb_ACD57845.1 | 0.202 | 24 | 0.152 | 24 | 0.152 | 23 | 0.109 | 0.132 | N | 0.57 | SignalP-noTM |
| gi_188519901_gb_ACD57846.1 | 0.131 | 15 | 0.169 | 15 | 0.362 | 27 | 0.212 | 0.189 | N | 0.57 | SignalP-noTM |
| gi_188519902_gb_ACD57847.1 | 0.702 | 33 | 0.785 | 33 | 0.973 | 23 | 0.887 | 0.833 | Y | 0.57 | SignalP-noTM |
| gi_188519903_gb_ACD57848.1 | 0.1   | 26 | 0.133 | 13 | 0.219 | 3  | 0.179 | 0.155 | N | 0.57 | SignalP-noTM |
| gi_188519904_gb_ACD57849.1 | 0.425 | 20 | 0.608 | 20 | 0.962 | 18 | 0.863 | 0.728 | Y | 0.57 | SignalP-noTM |
| gi_188519907_gb_ACD57852.1 | 0.718 | 26 | 0.824 | 26 | 0.985 | 16 | 0.952 | 0.885 | Y | 0.57 | SignalP-noTM |
| gi_188519910_gb_ACD57855.1 | 0.153 | 51 | 0.136 | 70 | 0.189 | 6  | 0.104 | 0.124 | N | 0.51 | SignalP-TM   |
| gi_188519911_gb_ACD57856.1 | 0.66  | 21 | 0.801 | 21 | 0.987 | 19 | 0.966 | 0.879 | Y | 0.57 | SignalP-noTM |
| gi_188519912_gb_ACD57857.1 | 0.117 | 67 | 0.153 | 22 | 0.281 | 17 | 0.213 | 0.181 | N | 0.57 | SignalP-noTM |
| gi_188519913_gb_ACD57858.1 | 0.122 | 35 | 0.126 | 30 | 0.166 | 3  | 0.125 | 0.126 | N | 0.51 | SignalP-TM   |
| gi_188519919_gb_ACD57864.1 | 0.204 | 12 | 0.26  | 12 | 0.475 | 8  | 0.34  | 0.298 | N | 0.57 | SignalP-noTM |
| gi_188519920_gb_ACD57865.1 | 0.178 | 23 | 0.375 | 23 | 0.922 | 4  | 0.837 | 0.592 | Y | 0.57 | SignalP-noTM |
| gi_188519921_gb_ACD57866.1 | 0.171 | 29 | 0.144 | 29 | 0.199 | 26 | 0.122 | 0.134 | N | 0.57 | SignalP-noTM |
| gi_188519922_gb_ACD57867.1 | 0.118 | 22 | 0.109 | 47 | 0.155 | 8  | 0.106 | 0.108 | N | 0.57 | SignalP-noTM |
| gi_188519923_gb_ACD57868.1 | 0.124 | 22 | 0.105 | 22 | 0.123 | 20 | 0.082 | 0.094 | N | 0.57 | SignalP-noTM |
| gi_188519924_gb_ACD57869.1 | 0.424 | 19 | 0.255 | 19 | 0.201 | 16 | 0.139 | 0.201 | N | 0.57 | SignalP-noTM |
| gi_188519925_gb_ACD57870.1 | 0.184 | 31 | 0.266 | 22 | 0.613 | 20 | 0.375 | 0.317 | N | 0.57 | SignalP-noTM |
| gi_188519926_gb_ACD57871.1 | 0.107 | 19 | 0.108 | 11 | 0.158 | 3  | 0.119 | 0.113 | N | 0.57 | SignalP-noTM |
| gi_188519927_gb_ACD57872.1 | 0.115 | 26 | 0.122 | 12 | 0.154 | 8  | 0.133 | 0.126 | N | 0.51 | SignalP-TM   |
| gi_188519928_gb_ACD57873.1 | 0.227 | 21 | 0.164 | 21 | 0.212 | 1  | 0.132 | 0.149 | N | 0.57 | SignalP-noTM |
| gi_188519929_gb_ACD57874.1 | 0.141 | 21 | 0.198 | 21 | 0.411 | 12 | 0.279 | 0.236 | N | 0.57 | SignalP-noTM |
| gi_188519930_gb_ACD57875.1 | 0.474 | 22 | 0.369 | 22 | 0.597 | 2  | 0.354 | 0.362 | N | 0.57 | SignalP-noTM |
| gi_188519931_gb_ACD57876.1 | 0.163 | 28 | 0.137 | 46 | 0.201 | 40 | 0.114 | 0.126 | N | 0.57 | SignalP-noTM |
| gi_188519932_gb_ACD57877.1 | 0.141 | 27 | 0.184 | 51 | 0.52  | 41 | 0.146 | 0.166 | N | 0.57 | SignalP-noTM |
| gi_188519933_gb_ACD57878.1 | 0.112 | 36 | 0.163 | 20 | 0.336 | 15 | 0.234 | 0.196 | N | 0.57 | SignalP-noTM |
| gi_188519934_gb_ACD57879.1 | 0.127 | 37 | 0.122 | 37 | 0.177 | 36 | 0.098 | 0.111 | N | 0.57 | SignalP-noTM |
| gi_188519935_gb_ACD57880.1 | 0.109 | 26 | 0.144 | 12 | 0.255 | 7  | 0.207 | 0.173 | N | 0.57 | SignalP-noTM |
| gi_188519936_gb_ACD57881.1 | 0.104 | 58 | 0.118 | 13 | 0.172 | 9  | 0.14  | 0.128 | N | 0.57 | SignalP-noTM |
| gi_188519937_gb_ACD57882.1 | 0.118 | 25 | 0.111 | 11 | 0.196 | 2  | 0.117 | 0.114 | N | 0.57 | SignalP-noTM |
| gi_188519940_gb_ACD57885.1 | 0.115 | 42 | 0.163 | 23 | 0.341 | 17 | 0.222 | 0.191 | N | 0.57 | SignalP-noTM |
| gi_188519941_gb_ACD57886.1 | 0.101 | 17 | 0.125 | 11 | 0.219 | 2  | 0.152 | 0.137 | N | 0.57 | SignalP-noTM |
| gi_188519942_gb_ACD57887.1 | 0.204 | 32 | 0.153 | 32 | 0.153 | 1  | 0.122 | 0.139 | N | 0.57 | SignalP-noTM |
| gi_188519943_gb_ACD57888.1 | 0.124 | 21 | 0.114 | 11 | 0.158 | 3  | 0.132 | 0.122 | N | 0.57 | SignalP-noTM |
| gi_188519944_gb_ACD57889.1 | 0.118 | 41 | 0.118 | 11 | 0.162 | 3  | 0.14  | 0.128 | N | 0.57 | SignalP-noTM |
| gi_188519945_gb_ACD57890.1 | 0.179 | 29 | 0.16  | 11 | 0.335 | 1  | 0.25  | 0.202 | N | 0.57 | SignalP-noTM |
| gi_188519946_gb_ACD57891.1 | 0.108 | 23 | 0.134 | 51 | 0.243 | 45 | 0.109 | 0.122 | N | 0.57 | SignalP-noTM |
| gi_188519947_gb_ACD57892.1 | 0.151 | 59 | 0.118 | 59 | 0.187 | 3  | 0.104 | 0.112 | N | 0.57 | SignalP-noTM |
| gi_188519948_gb_ACD57893.1 | 0.128 | 51 | 0.107 | 51 | 0.129 | 1  | 0.086 | 0.097 | N | 0.57 | SignalP-noTM |
| gi_188519949_gb_ACD57894.1 | 0.122 | 41 | 0.182 | 17 | 0.43  | 14 | 0.323 | 0.248 | N | 0.57 | SignalP-noTM |
| gi_188519950_gb_ACD57895.1 | 0.101 | 32 | 0.109 | 50 | 0.137 | 41 | 0.091 | 0.101 | N | 0.57 | SignalP-noTM |
| gi_188519951_gb_ACD57896.1 | 0.157 | 52 | 0.125 | 11 | 0.212 | 1  | 0.151 | 0.137 | N | 0.57 | SignalP-noTM |
| gi_188519952_gb_ACD57897.1 | 0.173 | 31 | 0.137 | 31 | 0.161 | 29 | 0.098 | 0.118 | N | 0.57 | SignalP-noTM |
| gi_188519953_gb_ACD57898.1 | 0.111 | 52 | 0.104 | 39 | 0.115 | 8  | 0.103 | 0.103 | N | 0.57 | SignalP-noTM |
| gi_188519954_gb_ACD57899.1 | 0.113 | 27 | 0.13  | 27 | 0.168 | 1  | 0.132 | 0.131 | N | 0.57 | SignalP-noTM |
| gi_188519955_gb_ACD57900.1 | 0.115 | 39 | 0.114 | 11 | 0.196 | 2  | 0.13  | 0.122 | N | 0.57 | SignalP-noTM |
| gi_188519956_gb_ACD57901.1 | 0.111 | 30 | 0.117 | 30 | 0.218 | 1  | 0.116 | 0.117 | N | 0.57 | SignalP-noTM |
| gi_188519957_gb_ACD57902.1 | 0.116 | 23 | 0.105 | 37 | 0.115 | 20 | 0.087 | 0.097 | N | 0.57 | SignalP-noTM |
| gi_188519958_gb_ACD57903.1 | 0.165 | 59 | 0.197 | 21 | 0.415 | 14 | 0.313 | 0.252 | N | 0.57 | SignalP-noTM |
| gi_188519959_gb_ACD57904.1 | 0.105 | 3  | 0.119 | 25 | 0.154 | 18 | 0.127 | 0.122 | N | 0.57 | SignalP-noTM |
| gi_188519960_gb_ACD57905.1 | 0.111 | 3  | 0.156 | 11 | 0.37  | 2  | 0.244 | 0.197 | N | 0.57 | SignalP-noTM |
| gi_188519961_gb_ACD57906.1 | 0.104 | 43 | 0.117 | 14 | 0.164 | 8  | 0.136 | 0.126 | N | 0.57 | SignalP-noTM |
| gi_188519962_gb_ACD57907.1 | 0.113 | 5  | 0.102 | 58 | 0.126 | 37 | 0.096 | 0.1   | N | 0.51 | SignalP-TM   |
| gi_188519963_gb_ACD57908.1 | 0.102 | 14 | 0.111 | 14 | 0.195 | 2  | 0.122 | 0.117 | N | 0.57 | SignalP-noTM |
| gi_188519964_gb_ACD57909.1 | 0.116 | 27 | 0.164 | 11 | 0.336 | 2  | 0.272 | 0.215 | N | 0.57 | SignalP-noTM |
| gi_188519965_gb_ACD57910.1 | 0.152 | 28 | 0.122 | 28 | 0.201 | 1  | 0.115 | 0.119 | N | 0.57 | SignalP-noTM |
| gi_188519966_gb_ACD57911.1 | 0.164 | 56 | 0.143 | 56 | 0.279 | 54 | 0.12  | 0.132 | N | 0.57 | SignalP-noTM |
| gi_188519967_gb_ACD57912.1 | 0.113 | 26 | 0.182 | 17 | 0.431 | 13 | 0.309 | 0.242 | N | 0.57 | SignalP-noTM |
| gi_188519971_gb_ACD57916.1 | 0.175 | 33 | 0.15  | 33 | 0.225 | 32 | 0.115 | 0.134 | N | 0.57 | SignalP-noTM |
| gi_188519972_gb_ACD57917.1 | 0.106 | 6  | 0.122 | 42 | 0.173 | 41 | 0.115 | 0.118 | N | 0.57 | SignalP-noTM |
| gi_188519974_gb_ACD57919.1 | 0.119 | 30 | 0.107 | 30 | 0.171 | 1  | 0.088 | 0.098 | N | 0.57 | SignalP-noTM |
| gi_188519983_gb_ACD57928.1 | 0.566 | 43 | 0.303 | 43 | 0.28  | 40 | 0.158 | 0.235 | N | 0.57 | SignalP-noTM |
| gi_188519984_gb_ACD57929.1 | 0.112 | 54 | 0.12  | 19 | 0.179 | 12 | 0.14  | 0.128 | N | 0.51 | SignalP-TM   |
| gi_188519985_gb_ACD57930.1 | 0.137 | 40 | 0.219 | 17 | 0.512 | 9  | 0.403 | 0.305 | N | 0.57 | SignalP-noTM |
| gi_188519986_gb_ACD57931.1 | 0.104 | 38 | 0.116 | 13 | 0.151 | 1  | 0.133 | 0.124 | N | 0.57 | SignalP-noTM |
| gi_188519991_gb_ACD57936.1 | 0.118 | 41 | 0.104 | 69 | 0.114 | 3  | 0.088 | 0.097 | N | 0.57 | SignalP-noTM |
| gi_188519992_gb_ACD57937.1 | 0.15  | 21 | 0.218 | 21 | 0.372 | 13 | 0.306 | 0.251 | N | 0.51 | SignalP-TM   |
| gi_188520000_gb_ACD57945.1 | 0.124 | 53 | 0.115 | 53 | 0.13  | 68 | 0.075 | 0.1   | N | 0.51 | SignalP-TM   |
| gi_188520001_gb_ACD57946.1 | 0.176 | 34 | 0.137 | 34 | 0.22  | 3  | 0.118 | 0.128 | N | 0.57 | SignalP-noTM |
| gi_188520002_gb_ACD57947.1 | 0.133 | 33 | 0.124 | 33 | 0.182 | 1  | 0.096 | 0.114 | N | 0.51 | SignalP-TM   |
| gi_188520003_gb_ACD57948.1 | 0.226 | 33 | 0.344 | 33 | 0.771 | 21 | 0.53  | 0.413 | N | 0.51 | SignalP-TM   |
| gi_188520004_gb_ACD57949.1 | 0.118 | 26 | 0.108 | 42 | 0.148 | 32 | 0.092 | 0.1   | N | 0.57 | SignalP-noTM |
| gi_188520009_gb_ACD57954.1 | 0.135 | 41 | 0.181 | 11 | 0.511 | 1  | 0.304 | 0.239 | N | 0.57 | SignalP-noTM |
| gi_188520011_gb_ACD57956.1 | 0.153 | 26 | 0.12  | 26 | 0.137 | 1  | 0.097 | 0.109 | N | 0.57 | SignalP-noTM |
| gi_188520013_gb_ACD57958.1 | 0.126 | 30 | 0.128 | 30 | 0.235 | 1  | 0.112 | 0.122 | N | 0.51 | SignalP-TM   |

|          |          |          |          |                            |
|----------|----------|----------|----------|----------------------------|
| 0.163557 | 0.014994 | 0.202458 | 0.127003 | gi_188519891_gb_ACD57836.1 |
| 0.083862 | 0.061399 | 0.0985   | 0.081254 | gi_188519892_gb_ACD57837.1 |
| 0.050023 | 0.002378 | 0.086907 | 0.049436 | gi_188519896_gb_ACD57841.1 |
| 0.067926 | 0.262697 | 0.149313 | 0.159979 | gi_188519897_gb_ACD57842.1 |
| 0.062444 | 0.10147  | 0.090052 | 0.084655 | gi_188519900_gb_ACD57845.1 |
| 0.136108 | 0.032233 | 0.188314 | 0.118885 | gi_188519901_gb_ACD57846.1 |
| 0.960985 | 0.999686 | 0.920195 | 0.960289 | gi_188519902_gb_ACD57847.1 |
| 0.774343 | 0.984373 | 0.834381 | 0.864366 | gi_188519903_gb_ACD57848.1 |
| 0.955976 | 0.989271 | 0.915212 | 0.953486 | gi_188519904_gb_ACD57849.1 |
| 0.954566 | 0.974169 | 0.902824 | 0.943853 | gi_188519907_gb_ACD57852.1 |
| 0.204891 | 0.181979 | 0.215853 | 0.200908 | gi_188519910_gb_ACD57855.1 |
| 0.890319 | 0.990613 | 0.875773 | 0.918902 | gi_188519911_gb_ACD57856.1 |
| 0.930539 | 0.987666 | 0.912616 | 0.943607 | gi_188519912_gb_ACD57857.1 |
| 0.162329 | 0.049219 | 0.203915 | 0.138488 | gi_188519913_gb_ACD57858.1 |
| 0.193411 | 0.159494 | 0.177994 | 0.176966 | gi_188519919_gb_ACD57864.1 |
| 0.842108 | 0.318863 | 0.884321 | 0.681764 | gi_188519920_gb_ACD57865.1 |
| 0.11847  | 0.050787 | 0.148932 | 0.106063 | gi_188519921_gb_ACD57866.1 |
| 0.099302 | 0.057216 | 0.113247 | 0.089922 | gi_188519922_gb_ACD57867.1 |
| 0.088105 | 0.983761 | 0.107072 | 0.392979 | gi_188519923_gb_ACD57868.1 |
| 0.072628 | 0.007013 | 0.095609 | 0.058417 | gi_188519924_gb_ACD57869.1 |
| 0.07024  | 0.003861 | 0.089806 | 0.054636 | gi_188519925_gb_ACD57870.1 |
| 0.057055 | 0.00455  | 0.074261 | 0.045289 | gi_188519926_gb_ACD57871.1 |
| 0.191081 | 0.138596 | 0.154727 | 0.161468 | gi_188519927_gb_ACD57872.1 |
| 0.086907 | 0.080247 | 0.06985  | 0.079001 | gi_188519928_gb_ACD57873.1 |
| 0.955212 | 0.999499 | 0.889141 | 0.947951 | gi_188519929_gb_ACD57874.1 |
| 0.957467 | 0.999952 | 0.916827 | 0.958082 | gi_188519930_gb_ACD57875.1 |
| 0.204403 | 0.002011 | 0.351603 | 0.186006 | gi_188519931_gb_ACD57876.1 |
| 0.23041  | 0.144056 | 0.248431 | 0.207632 | gi_188519932_gb_ACD57877.1 |
| 0.075718 | 0.059861 | 0.089074 | 0.078484 | gi_188519933_gb_ACD57878.1 |
| 0.075299 | 0.067547 | 0.080247 | 0.074364 | gi_188519934_gb_ACD57879.1 |
| 0.948632 | 0.674586 | 0.873471 | 0.83223  | gi_188519935_gb_ACD57880.1 |
| 0.359163 | 0.861045 | 0.570036 | 0.596748 |                            |



|                           |       |    |       |    |       |    |       |       |   |      |              |  |
|---------------------------|-------|----|-------|----|-------|----|-------|-------|---|------|--------------|--|
| gj_188520150_gb_ACD580951 | 0.619 | 22 | 0.741 | 22 | 0.929 | 17 | 0.865 | 0.8   | Y | 0.57 | SignalP-noTM |  |
| gj_188520151_gb_ACD580961 | 0.282 | 61 | 0.191 | 61 | 0.277 | 1  | 0.151 | 0.177 | N | 0.51 | SignalP-TM   |  |
| gj_188520154_gb_ACD580991 | 0.181 | 22 | 0.361 | 12 | 0.91  | 10 | 0.85  | 0.591 | Y | 0.57 | SignalP-noTM |  |
| gj_188520155_gb_ACD581001 | 0.128 | 35 | 0.134 | 35 | 0.197 | 31 | 0.132 | 0.133 | N | 0.57 | SignalP-noTM |  |
| gj_188520156_gb_ACD581011 | 0.239 | 26 | 0.428 | 20 | 0.928 | 12 | 0.89  | 0.645 | Y | 0.57 | SignalP-noTM |  |
| gj_188520157_gb_ACD581021 | 0.159 | 29 | 0.241 | 11 | 0.722 | 1  | 0.589 | 0.37  | N | 0.51 | SignalP-TM   |  |
| gj_188520158_gb_ACD581031 | 0.124 | 44 | 0.18  | 17 | 0.441 | 13 | 0.295 | 0.234 | N | 0.57 | SignalP-noTM |  |
| gj_188520159_gb_ACD581041 | 0.114 | 51 | 0.1   | 31 | 0.121 | 21 | 0.084 | 0.094 | N | 0.51 | SignalP-TM   |  |
| gj_188520166_gb_ACD581111 | 0.124 | 23 | 0.151 | 11 | 0.325 | 4  | 0.217 | 0.182 | N | 0.57 | SignalP-noTM |  |
| gj_188520167_gb_ACD581121 | 0.132 | 34 | 0.128 | 34 | 0.171 | 24 | 0.119 | 0.124 | N | 0.57 | SignalP-noTM |  |
| gj_188520169_gb_ACD581141 | 0.112 | 54 | 0.16  | 13 | 0.319 | 9  | 0.254 | 0.204 | N | 0.57 | SignalP-noTM |  |
| gj_188520170_gb_ACD581151 | 0.17  | 31 | 0.146 | 31 | 0.257 | 1  | 0.145 | 0.146 | N | 0.57 | SignalP-noTM |  |
| gj_188520171_gb_ACD581161 | 0.234 | 33 | 0.157 | 33 | 0.183 | 32 | 0.098 | 0.129 | N | 0.57 | SignalP-noTM |  |
| gj_188520177_gb_ACD581221 | 0.206 | 32 | 0.191 | 32 | 0.297 | 23 | 0.182 | 0.188 | N | 0.51 | SignalP-TM   |  |
| gj_188520178_gb_ACD581231 | 0.14  | 43 | 0.191 | 22 | 0.496 | 3  | 0.363 | 0.254 | N | 0.51 | SignalP-TM   |  |
| gj_188520179_gb_ACD581241 | 0.122 | 17 | 0.137 | 11 | 0.293 | 1  | 0.182 | 0.154 | N | 0.51 | SignalP-TM   |  |
| gj_188520180_gb_ACD581251 | 0.115 | 37 | 0.123 | 21 | 0.193 | 1  | 0.139 | 0.129 | N | 0.51 | SignalP-TM   |  |
| gj_188520181_gb_ACD581261 | 0.11  | 30 | 0.155 | 11 | 0.367 | 1  | 0.222 | 0.186 | N | 0.57 | SignalP-noTM |  |
| gj_188520187_gb_ACD581321 | 0.199 | 26 | 0.154 | 26 | 0.156 | 25 | 0.11  | 0.133 | N | 0.57 | SignalP-noTM |  |
| gj_188520188_gb_ACD581331 | 0.121 | 26 | 0.152 | 11 | 0.28  | 1  | 0.229 | 0.188 | N | 0.57 | SignalP-noTM |  |
| gj_188520189_gb_ACD581341 | 0.211 | 17 | 0.187 | 17 | 0.254 | 16 | 0.165 | 0.176 | N | 0.57 | SignalP-noTM |  |
| gj_188520190_gb_ACD581351 | 0.181 | 20 | 0.205 | 20 | 0.457 | 10 | 0.242 | 0.223 | N | 0.57 | SignalP-noTM |  |
| gj_188520191_gb_ACD581361 | 0.232 | 18 | 0.209 | 18 | 0.407 | 4  | 0.243 | 0.225 | N | 0.57 | SignalP-noTM |  |
| gj_188520193_gb_ACD581381 | 0.127 | 19 | 0.099 | 19 | 0.102 | 52 | 0.077 | 0.089 | N | 0.57 | SignalP-noTM |  |
| gj_188520194_gb_ACD581391 | 0.116 | 45 | 0.152 | 13 | 0.272 | 11 | 0.234 | 0.19  | N | 0.57 | SignalP-noTM |  |
| gj_188520195_gb_ACD581401 | 0.174 | 61 | 0.165 | 61 | 0.262 | 40 | 0.151 | 0.159 | N | 0.57 | SignalP-noTM |  |
| gj_188520196_gb_ACD581411 | 0.111 | 51 | 0.138 | 21 | 0.257 | 13 | 0.161 | 0.149 | N | 0.57 | SignalP-noTM |  |
| gj_188520203_gb_ACD581481 | 0.393 | 24 | 0.61  | 24 | 0.983 | 12 | 0.943 | 0.766 | Y | 0.57 | SignalP-noTM |  |
| gj_188520205_gb_ACD581501 | 0.145 | 41 | 0.113 | 11 | 0.162 | 1  | 0.13  | 0.12  | N | 0.51 | SignalP-TM   |  |
| gj_188520206_gb_ACD581511 | 0.106 | 43 | 0.173 | 11 | 0.365 | 5  | 0.305 | 0.235 | N | 0.57 | SignalP-noTM |  |
| gj_188520209_gb_ACD581541 | 0.846 | 24 | 0.907 | 24 | 0.986 | 13 | 0.967 | 0.935 | Y | 0.57 | SignalP-noTM |  |
| gj_188520215_gb_ACD581601 | 0.267 | 16 | 0.445 | 16 | 0.866 | 1  | 0.756 | 0.591 | Y | 0.57 | SignalP-noTM |  |
| gj_188520218_gb_ACD581631 | 0.111 | 44 | 0.099 | 66 | 0.115 | 3  | 0.083 | 0.092 | N | 0.57 | SignalP-noTM |  |
| gj_188520219_gb_ACD581641 | 0.104 | 31 | 0.113 | 18 | 0.154 | 13 | 0.122 | 0.117 | N | 0.57 | SignalP-noTM |  |
| gj_188520220_gb_ACD581651 | 0.101 | 56 | 0.105 | 69 | 0.138 | 8  | 0.096 | 0.101 | N | 0.57 | SignalP-noTM |  |
| gj_188520222_gb_ACD581671 | 0.119 | 52 | 0.166 | 14 | 0.379 | 49 | 0.279 | 0.219 | N | 0.57 | SignalP-noTM |  |
| gj_188520223_gb_ACD581681 | 0.284 | 35 | 0.265 | 35 | 0.457 | 34 | 0.197 | 0.233 | N | 0.57 | SignalP-noTM |  |
| gj_188520224_gb_ACD581691 | 0.199 | 45 | 0.137 | 45 | 0.133 | 2  | 0.097 | 0.118 | N | 0.57 | SignalP-noTM |  |
| gj_188520225_gb_ACD581701 | 0.242 | 29 | 0.195 | 29 | 0.419 | 1  | 0.216 | 0.203 | N | 0.51 | SignalP-TM   |  |
| gj_188520226_gb_ACD581711 | 0.154 | 19 | 0.128 | 19 | 0.21  | 1  | 0.112 | 0.12  | N | 0.57 | SignalP-noTM |  |
| gj_188520228_gb_ACD581731 | 0.159 | 31 | 0.247 | 31 | 0.528 | 23 | 0.335 | 0.28  | N | 0.51 | SignalP-TM   |  |
| gj_188520229_gb_ACD581741 | 0.109 | 35 | 0.1   | 16 | 0.12  | 7  | 0.097 | 0.099 | N | 0.51 | SignalP-TM   |  |
| gj_188520230_gb_ACD581751 | 0.157 | 16 | 0.177 | 16 | 0.287 | 1  | 0.212 | 0.19  | N | 0.51 | SignalP-TM   |  |
| gj_188520231_gb_ACD581761 | 0.147 | 46 | 0.124 | 46 | 0.133 | 37 | 0.071 | 0.104 | N | 0.51 | SignalP-TM   |  |
| gj_188520232_gb_ACD581771 | 0.612 | 22 | 0.764 | 22 | 0.975 | 11 | 0.954 | 0.854 | Y | 0.57 | SignalP-noTM |  |
| gj_188520233_gb_ACD581781 | 0.119 | 18 | 0.115 | 18 | 0.123 | 25 | 0.105 | 0.11  | N | 0.57 | SignalP-noTM |  |
| gj_188520234_gb_ACD581791 | 0.157 | 38 | 0.167 | 50 | 0.395 | 45 | 0.148 | 0.158 | N | 0.57 | SignalP-noTM |  |
| gj_188520235_gb_ACD581801 | 0.106 | 19 | 0.095 | 36 | 0.107 | 1  | 0.07  | 0.086 | N | 0.51 | SignalP-TM   |  |
| gj_188520236_gb_ACD581811 | 0.121 | 46 | 0.117 | 46 | 0.164 | 18 | 0.109 | 0.113 | N | 0.57 | SignalP-noTM |  |
| gj_188520237_gb_ACD581821 | 0.128 | 36 | 0.115 | 36 | 0.117 | 31 | 0.092 | 0.104 | N | 0.57 | SignalP-noTM |  |
| gj_188520238_gb_ACD581831 | 0.107 | 21 | 0.105 | 40 | 0.119 | 20 | 0.096 | 0.101 | N | 0.57 | SignalP-noTM |  |
| gj_188520240_gb_ACD581851 | 0.139 | 19 | 0.19  | 19 | 0.459 | 11 | 0.219 | 0.204 | N | 0.57 | SignalP-noTM |  |
| gj_188520242_gb_ACD581871 | 0.121 | 46 | 0.117 | 46 | 0.164 | 18 | 0.109 | 0.113 | N | 0.57 | SignalP-noTM |  |
| gj_188520244_gb_ACD581891 | 0.116 | 19 | 0.107 | 67 | 0.127 | 40 | 0.094 | 0.101 | N | 0.57 | SignalP-noTM |  |
| gj_188520245_gb_ACD581901 | 0.148 | 21 | 0.12  | 21 | 0.149 | 9  | 0.106 | 0.113 | N | 0.57 | SignalP-noTM |  |
| gj_188520251_gb_ACD581961 | 0.133 | 22 | 0.158 | 22 | 0.292 | 11 | 0.194 | 0.175 | N | 0.57 | SignalP-noTM |  |
| gj_188520257_gb_ACD582021 | 0.111 | 27 | 0.131 | 18 | 0.216 | 1  | 0.161 | 0.145 | N | 0.57 | SignalP-noTM |  |
| gj_188520258_gb_ACD582031 | 0.115 | 63 | 0.131 | 12 | 0.233 | 4  | 0.178 | 0.153 | N | 0.57 | SignalP-noTM |  |
| gj_188520260_gb_ACD582051 | 0.131 | 32 | 0.146 | 32 | 0.298 | 30 | 0.151 | 0.148 | N | 0.57 | SignalP-noTM |  |
| gj_188520261_gb_ACD582061 | 0.124 | 40 | 0.117 | 40 | 0.129 | 38 | 0.081 | 0.1   | N | 0.57 | SignalP-noTM |  |
| gj_188520262_gb_ACD582071 | 0.145 | 52 | 0.12  | 52 | 0.114 | 41 | 0.086 | 0.104 | N | 0.57 | SignalP-noTM |  |
| gj_188520263_gb_ACD582081 | 0.131 | 25 | 0.118 | 51 | 0.17  | 47 | 0.087 | 0.104 | N | 0.57 | SignalP-noTM |  |
| gj_188520264_gb_ACD582091 | 0.108 | 59 | 0.101 | 30 | 0.12  | 2  | 0.088 | 0.095 | N | 0.57 | SignalP-noTM |  |
| gj_188520265_gb_ACD582101 | 0.214 | 43 | 0.137 | 43 | 0.115 | 41 | 0.084 | 0.112 | N | 0.57 | SignalP-noTM |  |
| gj_188520266_gb_ACD582111 | 0.123 | 25 | 0.109 | 11 | 0.168 | 1  | 0.114 | 0.111 | N | 0.57 | SignalP-noTM |  |
| gj_188520267_gb_ACD582121 | 0.157 | 49 | 0.119 | 49 | 0.124 | 12 | 0.094 | 0.107 | N | 0.57 | SignalP-noTM |  |
| gj_188520268_gb_ACD582131 | 0.101 | 26 | 0.136 | 14 | 0.268 | 6  | 0.185 | 0.159 | N | 0.57 | SignalP-noTM |  |
| gj_188520269_gb_ACD582141 | 0.12  | 32 | 0.134 | 11 | 0.251 | 5  | 0.191 | 0.16  | N | 0.57 | SignalP-noTM |  |
| gj_188520270_gb_ACD582151 | 0.214 | 34 | 0.165 | 34 | 0.239 | 2  | 0.147 | 0.157 | N | 0.57 | SignalP-noTM |  |
| gj_188520271_gb_ACD582161 | 0.718 | 20 | 0.608 | 20 | 0.721 | 19 | 0.514 | 0.564 | N | 0.57 | SignalP-noTM |  |
| gj_188520272_gb_ACD582171 | 0.244 | 30 | 0.185 | 18 | 0.26  | 1  | 0.17  | 0.178 | N | 0.57 | SignalP-noTM |  |
| gj_188520273_gb_ACD582181 | 0.124 | 23 | 0.115 | 23 | 0.199 | 1  | 0.105 | 0.111 | N | 0.57 | SignalP-noTM |  |
| gj_188520274_gb_ACD582191 | 0.125 | 34 | 0.126 | 34 | 0.194 | 32 | 0.108 | 0.117 | N | 0.57 | SignalP-noTM |  |
| gj_188520275_gb_ACD582201 | 0.141 | 29 | 0.137 | 11 | 0.229 | 5  | 0.198 | 0.159 | N | 0.51 | SignalP-TM   |  |
| gj_188520276_gb_ACD582211 | 0.225 | 43 | 0.215 | 43 | 0.513 | 42 | 0.147 | 0.183 | N | 0.57 | SignalP-noTM |  |
| gj_188520277_gb_ACD582221 | 0.161 | 25 | 0.106 | 25 | 0.105 | 47 | 0.067 | 0.087 | N | 0.57 | SignalP-noTM |  |
| gj_188520278_gb_ACD582231 | 0.126 | 57 | 0.108 | 21 | 0.142 | 9  | 0.113 | 0.11  | N | 0.57 | SignalP-noTM |  |
| gj_188520279_gb_ACD582241 | 0.105 | 47 | 0.127 | 52 | 0.209 | 43 | 0.117 | 0.122 | N | 0.57 | SignalP-noTM |  |

|          |            |          |          |                           |
|----------|------------|----------|----------|---------------------------|
| 0.390788 | 0.22461    | 0.427025 | 0.347474 | gj_188520150_gb_ACD580951 |
| 0.097704 | 0.431435   | 0.222527 | 0.250555 | gj_188520151_gb_ACD580961 |
| 0.199667 | 0.073441   | 0.230942 | 0.167983 | gj_188520154_gb_ACD580991 |
| 0.641527 | 0.928972   | 0.788182 | 0.786227 | gj_188520155_gb_ACD581001 |
| 0.27908  | 0.096129   | 0.352287 | 0.241165 | gj_188520156_gb_ACD581011 |
| 0.112645 | 0.054526   | 0.136108 | 0.101093 | gj_188520157_gb_ACD581021 |
| 0.234693 | 0.109975   | 0.30789  | 0.217519 | gj_188520158_gb_ACD581031 |
| 0.121639 | 0.1034     | 0.14517  | 0.123403 | gj_188520159_gb_ACD581041 |
| 0.120363 | 0.069655   | 0.167702 | 0.11924  | gj_188520166_gb_ACD581111 |
| 0.968194 | 0.92365    | 0.894069 | 0.925304 | gj_188520167_gb_ACD581121 |
| 0.152775 | 0.830194   | 0.084788 | 0.355919 | gj_188520169_gb_ACD581141 |
| 0.366793 | 0.359854   | 0.246197 | 0.324281 | gj_188520170_gb_ACD581151 |
| 0.177118 | 0.182873   | 0.081137 | 0.147043 | gj_188520171_gb_ACD581161 |
| 0.918639 | 0.990613   | 0.896877 | 0.935376 | gj_188520177_gb_ACD581221 |
| 0.105364 | 0.386511   | 0.088346 | 0.193407 | gj_188520178_gb_ACD581231 |
| 0.093046 | 0.585405   | 0.186487 | 0.288313 | gj_188520179_gb_ACD581241 |
| 0.111452 | 0.057378   | 0.148932 | 0.105921 | gj_188520180_gb_ACD581251 |
| 0.089317 | 0.014175   | 0.119413 | 0.074302 | gj_188520181_gb_ACD581261 |
| 0.109389 | 0.053      | 0.141851 | 0.101413 | gj_188520187_gb_ACD581321 |
| 0.368188 | 0.884933   | 0.266784 | 0.506635 | gj_188520188_gb_ACD581331 |
| 0.669959 | 0.999607   | 0.622694 | 0.764087 | gj_188520189_gb_ACD581341 |
| 0.123575 | 0.163557   | 0.144798 | 0.143977 | gj_188520190_gb_ACD581351 |
| 0.234154 | 0.751009   | 0.37449  | 0.453218 | gj_188520191_gb_ACD581361 |
| 0.137525 | 0.222527   | 0.124227 | 0.161426 | gj_188520193_gb_ACD581381 |
| 0.507499 | 0.085724   | 0.586133 | 0.393119 | gj_188520194_gb_ACD581391 |
| 0.148173 | 0.215853   | 0.088588 | 0.150871 | gj_188520195_gb_ACD581401 |
| 0.234693 | 0.913568   | 0.216361 | 0.454874 | gj_188520196_gb_ACD581411 |
| 0.811227 | 0.276878   | 0.796085 | 0.628063 | gj_188520203_gb_ACD581481 |
| 0.083402 | 0.611352   | 0.168541 | 0.287765 | gj_188520205_gb_ACD581501 |
| 0.341414 | 0.988716</ |          |          |                           |



|                            |       |    |       |    |       |    |       |       |   |      |              |
|----------------------------|-------|----|-------|----|-------|----|-------|-------|---|------|--------------|
| gj_188520286_gb_ACD58231_1 | 0.159 | 53 | 0.148 | 53 | 0.212 | 51 | 0.106 | 0.128 | N | 0.57 | SignalP-noTM |
| gj_188520294_gb_ACD58239_1 | 0.174 | 24 | 0.267 | 19 | 0.742 | 7  | 0.577 | 0.413 | N | 0.57 | SignalP-noTM |
| gj_188520295_gb_ACD58240_1 | 0.156 | 35 | 0.16  | 35 | 0.268 | 24 | 0.164 | 0.162 | N | 0.51 | SignalP-TM   |
| gj_188520296_gb_ACD58241_1 | 0.128 | 29 | 0.123 | 29 | 0.141 | 26 | 0.098 | 0.111 | N | 0.57 | SignalP-noTM |
| gj_188520297_gb_ACD58242_1 | 0.182 | 22 | 0.15  | 22 | 0.173 | 18 | 0.098 | 0.131 | N | 0.51 | SignalP-TM   |
| gj_188520299_gb_ACD58244_1 | 0.145 | 28 | 0.119 | 28 | 0.126 | 1  | 0.097 | 0.109 | N | 0.57 | SignalP-noTM |
| gj_188520316_gb_ACD58261_1 | 0.105 | 51 | 0.11  | 51 | 0.134 | 46 | 0.095 | 0.103 | N | 0.57 | SignalP-noTM |
| gj_188520317_gb_ACD58262_1 | 0.131 | 54 | 0.119 | 22 | 0.196 | 16 | 0.118 | 0.118 | N | 0.57 | SignalP-noTM |
| gj_188520318_gb_ACD58263_1 | 0.118 | 49 | 0.123 | 26 | 0.301 | 24 | 0.13  | 0.126 | N | 0.57 | SignalP-noTM |
| gj_188520319_gb_ACD58264_1 | 0.11  | 26 | 0.118 | 11 | 0.174 | 1  | 0.138 | 0.127 | N | 0.57 | SignalP-noTM |
| gj_188520320_gb_ACD58265_1 | 0.134 | 17 | 0.11  | 40 | 0.168 | 38 | 0.088 | 0.1   | N | 0.57 | SignalP-noTM |
| gj_188520321_gb_ACD58266_1 | 0.163 | 33 | 0.177 | 11 | 0.451 | 18 | 0.322 | 0.231 | N | 0.51 | SignalP-TM   |
| gj_188520322_gb_ACD58267_1 | 0.119 | 32 | 0.169 | 11 | 0.405 | 6  | 0.307 | 0.234 | N | 0.57 | SignalP-noTM |
| gj_188520323_gb_ACD58268_1 | 0.141 | 42 | 0.219 | 27 | 0.453 | 17 | 0.364 | 0.272 | N | 0.51 | SignalP-TM   |
| gj_188520324_gb_ACD58269_1 | 0.342 | 42 | 0.255 | 42 | 0.32  | 36 | 0.118 | 0.204 | N | 0.51 | SignalP-TM   |
| gj_188520325_gb_ACD58270_1 | 0.13  | 9  | 0.121 | 55 | 0.204 | 48 | 0.104 | 0.113 | N | 0.57 | SignalP-noTM |
| gj_188520326_gb_ACD58271_1 | 0.146 | 24 | 0.186 | 24 | 0.33  | 9  | 0.232 | 0.208 | N | 0.57 | SignalP-noTM |
| gj_188520327_gb_ACD58272_1 | 0.351 | 20 | 0.292 | 20 | 0.412 | 16 | 0.24  | 0.268 | N | 0.57 | SignalP-noTM |
| gj_188520328_gb_ACD58273_1 | 0.187 | 21 | 0.229 | 21 | 0.433 | 2  | 0.289 | 0.257 | N | 0.57 | SignalP-noTM |
| gj_188520329_gb_ACD58274_1 | 0.136 | 34 | 0.135 | 34 | 0.213 | 30 | 0.119 | 0.128 | N | 0.57 | SignalP-noTM |
| gj_188520332_gb_ACD58277_1 | 0.2   | 31 | 0.19  | 24 | 0.453 | 14 | 0.257 | 0.222 | N | 0.57 | SignalP-noTM |
| gj_188520333_gb_ACD58278_1 | 0.15  | 22 | 0.177 | 22 | 0.246 | 3  | 0.215 | 0.191 | N | 0.51 | SignalP-TM   |
| gj_188520336_gb_ACD58281_1 | 0.277 | 19 | 0.152 | 50 | 0.184 | 48 | 0.096 | 0.126 | N | 0.57 | SignalP-noTM |
| gj_188520337_gb_ACD58282_1 | 0.355 | 31 | 0.211 | 31 | 0.193 | 5  | 0.137 | 0.176 | N | 0.57 | SignalP-noTM |
| gj_188520340_gb_ACD58285_1 | 0.282 | 25 | 0.227 | 25 | 0.324 | 21 | 0.174 | 0.202 | N | 0.57 | SignalP-noTM |
| gj_188520341_gb_ACD58286_1 | 0.123 | 55 | 0.179 | 19 | 0.337 | 8  | 0.275 | 0.215 | N | 0.51 | SignalP-TM   |
| gj_188520342_gb_ACD58287_1 | 0.133 | 39 | 0.112 | 39 | 0.21  | 1  | 0.095 | 0.106 | N | 0.51 | SignalP-TM   |
| gj_188520346_gb_ACD58291_1 | 0.525 | 21 | 0.529 | 21 | 0.641 | 17 | 0.537 | 0.533 | N | 0.57 | SignalP-noTM |
| gj_188520347_gb_ACD58292_1 | 0.575 | 26 | 0.701 | 26 | 0.989 | 11 | 0.909 | 0.799 | Y | 0.57 | SignalP-noTM |
| gj_188520348_gb_ACD58293_1 | 0.162 | 26 | 0.251 | 23 | 0.526 | 13 | 0.409 | 0.325 | N | 0.57 | SignalP-noTM |
| gj_188520349_gb_ACD58294_1 | 0.136 | 19 | 0.135 | 19 | 0.175 | 15 | 0.138 | 0.136 | N | 0.57 | SignalP-noTM |
| gj_188520350_gb_ACD58295_1 | 0.134 | 33 | 0.156 | 18 | 0.308 | 13 | 0.221 | 0.18  | N | 0.51 | SignalP-TM   |
| gj_188520351_gb_ACD58296_1 | 0.125 | 24 | 0.119 | 24 | 0.141 | 21 | 0.113 | 0.116 | N | 0.57 | SignalP-noTM |
| gj_188520352_gb_ACD58297_1 | 0.14  | 30 | 0.148 | 24 | 0.378 | 1  | 0.183 | 0.161 | N | 0.51 | SignalP-TM   |
| gj_188520353_gb_ACD58298_1 | 0.214 | 55 | 0.247 | 55 | 0.407 | 51 | 0.182 | 0.223 | N | 0.51 | SignalP-TM   |
| gj_188520354_gb_ACD58299_1 | 0.162 | 38 | 0.113 | 38 | 0.109 | 7  | 0.085 | 0.1   | N | 0.57 | SignalP-noTM |
| gj_188520355_gb_ACD58300_1 | 0.142 | 32 | 0.125 | 47 | 0.251 | 46 | 0.103 | 0.115 | N | 0.57 | SignalP-noTM |
| gj_188520357_gb_ACD58302_1 | 0.102 | 27 | 0.102 | 45 | 0.118 | 43 | 0.087 | 0.095 | N | 0.57 | SignalP-noTM |
| gj_188520358_gb_ACD58303_1 | 0.108 | 58 | 0.117 | 11 | 0.174 | 1  | 0.131 | 0.124 | N | 0.57 | SignalP-TM   |
| gj_188520359_gb_ACD58304_1 | 0.116 | 21 | 0.138 | 21 | 0.193 | 11 | 0.146 | 0.141 | N | 0.51 | SignalP-TM   |
| gj_188520360_gb_ACD58305_1 | 0.158 | 35 | 0.369 | 35 | 0.927 | 24 | 0.701 | 0.525 | N | 0.57 | SignalP-noTM |
| gj_188520363_gb_ACD58308_1 | 0.116 | 27 | 0.103 | 45 | 0.152 | 2  | 0.096 | 0.1   | N | 0.57 | SignalP-noTM |
| gj_188520364_gb_ACD58309_1 | 0.343 | 31 | 0.347 | 31 | 0.479 | 23 | 0.239 | 0.307 | N | 0.51 | SignalP-TM   |
| gj_188520365_gb_ACD58310_1 | 0.126 | 32 | 0.121 | 32 | 0.188 | 1  | 0.124 | 0.122 | N | 0.57 | SignalP-noTM |
| gj_188520366_gb_ACD58311_1 | 0.156 | 25 | 0.185 | 25 | 0.34  | 17 | 0.225 | 0.204 | N | 0.57 | SignalP-noTM |
| gj_188520367_gb_ACD58312_1 | 0.12  | 43 | 0.132 | 43 | 0.221 | 33 | 0.135 | 0.133 | N | 0.57 | SignalP-noTM |
| gj_188520368_gb_ACD58313_1 | 0.107 | 32 | 0.095 | 64 | 0.096 | 62 | 0.075 | 0.085 | N | 0.57 | SignalP-noTM |
| gj_188520369_gb_ACD58314_1 | 0.121 | 23 | 0.106 | 42 | 0.135 | 38 | 0.085 | 0.096 | N | 0.57 | SignalP-noTM |
| gj_188520371_gb_ACD58316_1 | 0.105 | 54 | 0.105 | 44 | 0.123 | 33 | 0.094 | 0.1   | N | 0.57 | SignalP-noTM |
| gj_188520372_gb_ACD58317_1 | 0.124 | 21 | 0.098 | 70 | 0.103 | 20 | 0.081 | 0.09  | N | 0.57 | SignalP-noTM |
| gj_188520373_gb_ACD58318_1 | 0.104 | 22 | 0.104 | 39 | 0.125 | 46 | 0.089 | 0.097 | N | 0.57 | SignalP-noTM |
| gj_188520374_gb_ACD58319_1 | 0.126 | 54 | 0.127 | 18 | 0.2   | 8  | 0.154 | 0.139 | N | 0.57 | SignalP-noTM |
| gj_188520375_gb_ACD58320_1 | 0.134 | 67 | 0.138 | 11 | 0.278 | 1  | 0.175 | 0.155 | N | 0.57 | SignalP-noTM |
| gj_188520376_gb_ACD58321_1 | 0.109 | 23 | 0.129 | 11 | 0.191 | 5  | 0.171 | 0.149 | N | 0.57 | SignalP-noTM |
| gj_188520377_gb_ACD58322_1 | 0.236 | 34 | 0.205 | 34 | 0.27  | 30 | 0.151 | 0.18  | N | 0.57 | SignalP-noTM |
| gj_188520378_gb_ACD58323_1 | 0.137 | 27 | 0.135 | 11 | 0.282 | 6  | 0.202 | 0.166 | N | 0.57 | SignalP-noTM |
| gj_188520379_gb_ACD58324_1 | 0.116 | 26 | 0.149 | 11 | 0.351 | 1  | 0.199 | 0.172 | N | 0.57 | SignalP-noTM |
| gj_188520381_gb_ACD58326_1 | 0.178 | 48 | 0.141 | 48 | 0.189 | 3  | 0.098 | 0.121 | N | 0.57 | SignalP-noTM |
| gj_188520382_gb_ACD58327_1 | 0.159 | 39 | 0.14  | 11 | 0.242 | 5  | 0.197 | 0.167 | N | 0.57 | SignalP-noTM |
| gj_188520383_gb_ACD58328_1 | 0.2   | 25 | 0.175 | 25 | 0.214 | 24 | 0.147 | 0.162 | N | 0.57 | SignalP-noTM |
| gj_188520385_gb_ACD58330_1 | 0.149 | 62 | 0.13  | 31 | 0.182 | 36 | 0.111 | 0.121 | N | 0.57 | SignalP-noTM |
| gj_188520386_gb_ACD58331_1 | 0.16  | 46 | 0.17  | 18 | 0.382 | 1  | 0.257 | 0.21  | N | 0.57 | SignalP-noTM |
| gj_188520388_gb_ACD58333_1 | 0.136 | 22 | 0.133 | 40 | 0.222 | 21 | 0.125 | 0.129 | N | 0.57 | SignalP-noTM |
| gj_188520389_gb_ACD58334_1 | 0.159 | 20 | 0.136 | 41 | 0.189 | 29 | 0.122 | 0.131 | N | 0.51 | SignalP-TM   |
| gj_188520398_gb_ACD58343_1 | 0.171 | 20 | 0.171 | 20 | 0.252 | 9  | 0.183 | 0.177 | N | 0.57 | SignalP-noTM |
| gj_188520399_gb_ACD58344_1 | 0.136 | 22 | 0.328 | 14 | 0.912 | 1  | 0.837 | 0.568 | N | 0.57 | SignalP-noTM |
| gj_188520401_gb_ACD58346_1 | 0.131 | 37 | 0.164 | 20 | 0.324 | 14 | 0.263 | 0.211 | N | 0.57 | SignalP-noTM |
| gj_188520406_gb_ACD58351_1 | 0.128 | 24 | 0.111 | 24 | 0.198 | 23 | 0.096 | 0.104 | N | 0.57 | SignalP-noTM |
| gj_188520408_gb_ACD58353_1 | 0.786 | 39 | 0.796 | 39 | 0.953 | 32 | 0.698 | 0.75  | Y | 0.57 | SignalP-noTM |
| gj_188520409_gb_ACD58354_1 | 0.155 | 30 | 0.223 | 30 | 0.556 | 25 | 0.291 | 0.255 | N | 0.57 | SignalP-noTM |
| gj_188520410_gb_ACD58355_1 | 0.114 | 38 | 0.104 | 38 | 0.126 | 30 | 0.09  | 0.097 | N | 0.57 | SignalP-noTM |
| gj_188520411_gb_ACD58356_1 | 0.174 | 19 | 0.135 | 19 | 0.176 | 42 | 0.101 | 0.119 | N | 0.57 | SignalP-noTM |
| gj_188520412_gb_ACD58357_1 | 0.113 | 65 | 0.109 | 11 | 0.159 | 2  | 0.119 | 0.114 | N | 0.57 | SignalP-noTM |
| gj_188520414_gb_ACD58359_1 | 0.224 | 57 | 0.146 | 57 | 0.32  | 1  | 0.109 | 0.129 | N | 0.57 | SignalP-noTM |
| gj_188520415_gb_ACD58360_1 | 0.106 | 39 | 0.102 | 20 | 0.133 | 11 | 0.092 | 0.097 | N | 0.57 | SignalP-noTM |
| gj_188520423_gb_ACD58368_1 | 0.126 | 46 | 0.115 | 46 | 0.145 | 18 | 0.104 | 0.11  | N | 0.57 | SignalP-noTM |
| gj_188520424_gb_ACD58369_1 | 0.151 | 38 | 0.225 | 11 | 0.693 | 1  | 0.491 | 0.35  | N | 0.57 | SignalP-noTM |
| gj_188520425_gb_ACD58370_1 | 0.112 | 25 | 0.122 | 41 | 0.25  | 1  | 0.119 | 0.121 | N | 0.51 | SignalP-TM   |

|          |          |          |          |                            |
|----------|----------|----------|----------|----------------------------|
| 0.115679 | 0.033961 | 0.146665 | 0.098768 | gj_188520286_gb_ACD58231_1 |
| 0.191081 | 0.10011  | 0.198134 | 0.163108 | gj_188520294_gb_ACD58239_1 |
| 0.141851 | 0.065681 | 0.208829 | 0.138787 | gj_188520295_gb_ACD58240_1 |
| 0.164792 | 0.153164 | 0.147795 | 0.15525  | gj_188520296_gb_ACD58241_1 |
| 0.084092 | 0.009699 | 0.158291 | 0.084027 | gj_188520297_gb_ACD58242_1 |
| 0.939118 | 0.99952  | 0.906701 | 0.944446 | gj_188520299_gb_ACD58244_1 |
| 0.07871  | 0.0527   | 0.086669 | 0.072693 | gj_188520316_gb_ACD58261_1 |
| 0.08181  | 0.046353 | 0.113247 | 0.08047  | gj_188520317_gb_ACD58262_1 |
| 0.11847  | 0.575176 | 0.115067 | 0.269571 | gj_188520318_gb_ACD58263_1 |
| 0.140397 | 0.045695 | 0.167284 | 0.117792 | gj_188520319_gb_ACD58264_1 |
| 0.072225 | 0.045826 | 0.121319 | 0.07979  | gj_188520320_gb_ACD58265_1 |
| 0.194818 | 0.424091 | 0.307252 | 0.30872  | gj_188520321_gb_ACD58266_1 |
| 0.141486 | 0.3028   | 0.085021 | 0.176436 | gj_188520322_gb_ACD58267_1 |
| 0.111452 | 0.036509 | 0.162329 | 0.10343  | gj_188520323_gb_ACD58268_1 |
| 0.289667 | 0.889141 | 0.253506 | 0.477438 | gj_188520324_gb_ACD58269_1 |
| 0.181979 | 0.78768  | 0.111749 | 0.360469 | gj_188520325_gb_ACD58270_1 |
| 0.097704 | 0.069655 | 0.108806 | 0.092055 | gj_188520326_gb_ACD58271_1 |
| 0.078276 | 0.026442 | 0.140397 | 0.081705 | gj_188520327_gb_ACD58272_1 |
| 0.172359 | 0.046619 | 0.158691 | 0.12589  | gj_188520328_gb_ACD58273_1 |
| 0.158291 | 0.112946 | 0.143318 | 0.138185 | gj_188520329_gb_ACD58274_1 |
| 0.075091 | 0.043647 | 0.128869 | 0.082536 | gj_188520332_gb_ACD58277_1 |
| 0.128532 | 0.043149 | 0.162737 | 0.111473 | gj_188520333_gb_ACD58278_1 |
| 0.099034 | 0.047562 | 0.145916 | 0.097504 | gj_188520336_gb_ACD58281_1 |
| 0.712181 | 0.75878  | 0.685033 | 0.718665 | gj_188520337_gb_ACD58282_1 |
| 0.181087 | 0.052104 | 0.24453  | 0.15924  | gj_188520340_gb_ACD58285_1 |
| 0.065131 | 0.066982 | 0.167284 | 0.099799 | gj_188520341_gb_ACD58286_1 |
| 0.128669 | 0.380836 | 0.109389 | 0.206365 | gj_188520342_gb_ACD58287_1 |
| 0.771711 | 0.972374 | 0.737303 | 0.827129 | gj_188520346_gb_ACD58291_1 |
| 0.917284 | 0.397953 | 0.927574 | 0.747604 | gj_188520347_gb_ACD58292_1 |
| 0.090545 | 0.018707 | 0.08181  | 0.063687 | gj_188520348_gb_ACD58293_1 |
| 0.739621 | 0.979265 | 0.645656 | 0.788181 | gj_188520349_gb_ACD58294_1 |
| 0.139093 | 0.269729 | 0.248431 | 0.216354 | gj_188520350_gb_ACD58295_1 |

|                            |       |    |       |    |       |    |       |       |   |      |              |
|----------------------------|-------|----|-------|----|-------|----|-------|-------|---|------|--------------|
| gi_188520426_gb_ACD58371.1 | 0.137 | 21 | 0.199 | 12 | 0.432 | 10 | 0.302 | 0.247 | N | 0.57 | SignalP-noTM |
| gi_188520427_gb_ACD58372.1 | 0.107 | 28 | 0.116 | 55 | 0.174 | 50 | 0.094 | 0.106 | N | 0.57 | SignalP-noTM |
| gi_188520428_gb_ACD58373.1 | 0.295 | 31 | 0.265 | 31 | 0.52  | 5  | 0.285 | 0.274 | N | 0.57 | SignalP-noTM |
| gi_188520429_gb_ACD58374.1 | 0.148 | 34 | 0.126 | 34 | 0.132 | 57 | 0.087 | 0.107 | N | 0.57 | SignalP-noTM |
| gi_188520432_gb_ACD58377.1 | 0.159 | 20 | 0.128 | 20 | 0.133 | 19 | 0.096 | 0.113 | N | 0.57 | SignalP-noTM |
| gi_188520434_gb_ACD58379.1 | 0.127 | 33 | 0.117 | 33 | 0.182 | 10 | 0.104 | 0.111 | N | 0.57 | SignalP-noTM |
| gi_188520435_gb_ACD58380.1 | 0.16  | 34 | 0.202 | 19 | 0.501 | 8  | 0.349 | 0.256 | N | 0.51 | SignalP-TM   |
| gi_188520436_gb_ACD58381.1 | 0.16  | 24 | 0.218 | 24 | 0.486 | 19 | 0.315 | 0.264 | N | 0.57 | SignalP-noTM |
| gi_188520437_gb_ACD58382.1 | 0.111 | 34 | 0.102 | 65 | 0.105 | 56 | 0.085 | 0.094 | N | 0.57 | SignalP-noTM |
| gi_188520438_gb_ACD58383.1 | 0.143 | 38 | 0.146 | 11 | 0.258 | 4  | 0.211 | 0.177 | N | 0.57 | SignalP-noTM |
| gi_188520439_gb_ACD58384.1 | 0.121 | 41 | 0.134 | 11 | 0.3   | 10 | 0.173 | 0.152 | N | 0.57 | SignalP-noTM |
| gi_188520441_gb_ACD58386.1 | 0.127 | 29 | 0.103 | 42 | 0.125 | 33 | 0.081 | 0.093 | N | 0.57 | SignalP-noTM |
| gi_188520442_gb_ACD58387.1 | 0.154 | 47 | 0.126 | 47 | 0.153 | 46 | 0.079 | 0.104 | N | 0.57 | SignalP-noTM |
| gi_188520444_gb_ACD58389.1 | 0.151 | 38 | 0.122 | 46 | 0.166 | 44 | 0.105 | 0.116 | N | 0.51 | SignalP-TM   |
| gi_188520445_gb_ACD58390.1 | 0.239 | 36 | 0.189 | 36 | 0.251 | 35 | 0.109 | 0.152 | N | 0.57 | SignalP-noTM |
| gi_188520446_gb_ACD58391.1 | 0.114 | 35 | 0.101 | 69 | 0.111 | 15 | 0.088 | 0.095 | N | 0.57 | SignalP-noTM |
| gi_188520447_gb_ACD58392.1 | 0.144 | 43 | 0.106 | 43 | 0.126 | 3  | 0.083 | 0.096 | N | 0.57 | SignalP-noTM |
| gi_188520448_gb_ACD58393.1 | 0.112 | 40 | 0.112 | 15 | 0.162 | 8  | 0.114 | 0.113 | N | 0.51 | SignalP-TM   |
| gi_188520451_gb_ACD58396.1 | 0.14  | 26 | 0.179 | 11 | 0.446 | 2  | 0.315 | 0.243 | N | 0.57 | SignalP-noTM |
| gi_188520452_gb_ACD58397.1 | 0.113 | 53 | 0.154 | 15 | 0.295 | 3  | 0.246 | 0.197 | N | 0.57 | SignalP-noTM |
| gi_188520454_gb_ACD58399.1 | 0.112 | 31 | 0.104 | 11 | 0.12  | 3  | 0.111 | 0.107 | N | 0.57 | SignalP-noTM |
| gi_188520455_gb_ACD58400.1 | 0.243 | 21 | 0.156 | 21 | 0.124 | 19 | 0.092 | 0.126 | N | 0.57 | SignalP-noTM |
| gi_188520456_gb_ACD58401.1 | 0.189 | 25 | 0.159 | 25 | 0.227 | 23 | 0.127 | 0.144 | N | 0.57 | SignalP-noTM |
| gi_188520457_gb_ACD58402.1 | 0.305 | 37 | 0.173 | 37 | 0.26  | 19 | 0.153 | 0.164 | N | 0.57 | SignalP-noTM |
| gi_188520458_gb_ACD58403.1 | 0.118 | 68 | 0.104 | 68 | 0.105 | 24 | 0.082 | 0.094 | N | 0.57 | SignalP-noTM |
| gi_188520469_gb_ACD58414.1 | 0.105 | 45 | 0.105 | 51 | 0.184 | 42 | 0.087 | 0.096 | N | 0.57 | SignalP-noTM |
| gi_188520481_gb_ACD58426.1 | 0.119 | 29 | 0.244 | 19 | 0.722 | 16 | 0.494 | 0.361 | N | 0.57 | SignalP-noTM |
| gi_188520490_gb_ACD58435.1 | 0.103 | 28 | 0.147 | 11 | 0.339 | 1  | 0.2   | 0.172 | N | 0.57 | SignalP-noTM |
| gi_188520491_gb_ACD58436.1 | 0.111 | 22 | 0.117 | 22 | 0.179 | 21 | 0.116 | 0.116 | N | 0.57 | SignalP-noTM |
| gi_188520498_gb_ACD58443.1 | 0.455 | 36 | 0.62  | 36 | 0.975 | 25 | 0.828 | 0.718 | Y | 0.57 | SignalP-noTM |
| gi_188520502_gb_ACD58447.1 | 0.145 | 27 | 0.136 | 27 | 0.186 | 13 | 0.128 | 0.133 | N | 0.57 | SignalP-noTM |
| gi_528897474_gb_ACD58449.2 | 0.113 | 66 | 0.122 | 56 | 0.198 | 47 | 0.111 | 0.117 | N | 0.57 | SignalP-noTM |
| gi_188520507_gb_ACD58452.1 | 0.117 | 32 | 0.128 | 18 | 0.206 | 8  | 0.157 | 0.142 | N | 0.57 | SignalP-noTM |
| gi_528897475_gb_ACD58455.2 | 0.113 | 66 | 0.122 | 56 | 0.198 | 47 | 0.111 | 0.117 | N | 0.57 | SignalP-noTM |
| gi_188520513_gb_ACD58458.1 | 0.121 | 61 | 0.112 | 19 | 0.157 | 13 | 0.122 | 0.121 | N | 0.57 | SignalP-noTM |
| gi_188520514_gb_ACD58459.1 | 0.225 | 29 | 0.172 | 29 | 0.3   | 28 | 0.134 | 0.155 | N | 0.57 | SignalP-noTM |
| gi_188520515_gb_ACD58460.1 | 0.122 | 31 | 0.16  | 26 | 0.289 | 3  | 0.201 | 0.179 | N | 0.57 | SignalP-noTM |
| gi_188520516_gb_ACD58461.1 | 0.105 | 3  | 0.099 | 32 | 0.11  | 20 | 0.092 | 0.096 | N | 0.57 | SignalP-noTM |
| gi_188520517_gb_ACD58462.1 | 0.175 | 39 | 0.128 | 39 | 0.128 | 2  | 0.092 | 0.111 | N | 0.57 | SignalP-noTM |
| gi_188520518_gb_ACD58463.1 | 0.105 | 3  | 0.1   | 18 | 0.117 | 12 | 0.096 | 0.098 | N | 0.57 | SignalP-noTM |
| gi_188520522_gb_ACD58467.1 | 0.128 | 26 | 0.104 | 26 | 0.126 | 2  | 0.09  | 0.097 | N | 0.57 | SignalP-noTM |
| gi_188520528_gb_ACD58473.1 | 0.149 | 23 | 0.138 | 23 | 0.21  | 6  | 0.15  | 0.143 | N | 0.57 | SignalP-noTM |
| gi_188520531_gb_ACD58476.1 | 0.156 | 42 | 0.146 | 42 | 0.211 | 19 | 0.139 | 0.142 | N | 0.57 | SignalP-noTM |
| gi_188520537_gb_ACD58482.1 | 0.171 | 41 | 0.14  | 41 | 0.208 | 8  | 0.144 | 0.142 | N | 0.57 | SignalP-noTM |
| gi_188520538_gb_ACD58483.1 | 0.117 | 33 | 0.223 | 19 | 0.586 | 15 | 0.469 | 0.339 | N | 0.57 | SignalP-noTM |
| gi_188520539_gb_ACD58484.1 | 0.106 | 48 | 0.137 | 14 | 0.269 | 6  | 0.186 | 0.16  | N | 0.57 | SignalP-noTM |
| gi_188520544_gb_ACD58489.1 | 0.113 | 13 | 0.107 | 35 | 0.143 | 29 | 0.085 | 0.096 | N | 0.57 | SignalP-noTM |
| gi_188520546_gb_ACD58491.1 | 0.157 | 35 | 0.131 | 35 | 0.14  | 53 | 0.093 | 0.117 | N | 0.51 | SignalP-TM   |
| gi_188520547_gb_ACD58492.1 | 0.139 | 20 | 0.175 | 20 | 0.351 | 1  | 0.229 | 0.201 | N | 0.57 | SignalP-noTM |
| gi_188520548_gb_ACD58493.1 | 0.112 | 24 | 0.129 | 11 | 0.227 | 3  | 0.172 | 0.149 | N | 0.57 | SignalP-noTM |
| gi_188520549_gb_ACD58494.1 | 0.149 | 26 | 0.15  | 46 | 0.28  | 42 | 0.123 | 0.137 | N | 0.57 | SignalP-noTM |
| gi_188520550_gb_ACD58495.1 | 0.142 | 42 | 0.151 | 42 | 0.24  | 35 | 0.134 | 0.144 | N | 0.51 | SignalP-TM   |
| gi_188520555_gb_ACD58500.1 | 0.131 | 37 | 0.145 | 11 | 0.336 | 1  | 0.189 | 0.166 | N | 0.57 | SignalP-noTM |
| gi_188520556_gb_ACD58501.1 | 0.109 | 45 | 0.151 | 12 | 0.325 | 6  | 0.237 | 0.191 | N | 0.57 | SignalP-noTM |
| gi_188520558_gb_ACD58503.1 | 0.1   | 25 | 0.12  | 12 | 0.178 | 2  | 0.144 | 0.131 | N | 0.57 | SignalP-noTM |
| gi_188520559_gb_ACD58504.1 | 0.16  | 24 | 0.11  | 39 | 0.147 | 36 | 0.095 | 0.104 | N | 0.51 | SignalP-TM   |
| gi_188520560_gb_ACD58505.1 | 0.192 | 48 | 0.167 | 48 | 0.242 | 37 | 0.111 | 0.146 | N | 0.51 | SignalP-TM   |
| gi_188520561_gb_ACD58506.1 | 0.168 | 23 | 0.384 | 23 | 0.949 | 17 | 0.901 | 0.627 | Y | 0.57 | SignalP-noTM |
| gi_188520562_gb_ACD58507.1 | 0.108 | 7  | 0.098 | 43 | 0.134 | 6  | 0.093 | 0.095 | N | 0.57 | SignalP-noTM |
| gi_188520563_gb_ACD58508.1 | 0.209 | 26 | 0.189 | 26 | 0.293 | 6  | 0.202 | 0.194 | N | 0.51 | SignalP-TM   |
| gi_188520564_gb_ACD58509.1 | 0.143 | 58 | 0.157 | 11 | 0.376 | 2  | 0.237 | 0.187 | N | 0.51 | SignalP-TM   |
| gi_188520566_gb_ACD58511.1 | 0.423 | 41 | 0.235 | 41 | 0.211 | 27 | 0.118 | 0.18  | N | 0.57 | SignalP-noTM |
| gi_188520577_gb_ACD58522.1 | 0.144 | 15 | 0.112 | 41 | 0.136 | 25 | 0.097 | 0.105 | N | 0.57 | SignalP-noTM |
| gi_188520578_gb_ACD58523.1 | 0.706 | 23 | 0.789 | 23 | 0.961 | 16 | 0.905 | 0.843 | Y | 0.57 | SignalP-noTM |
| gi_188520579_gb_ACD58524.1 | 0.122 | 20 | 0.199 | 11 | 0.501 | 4  | 0.384 | 0.286 | N | 0.57 | SignalP-noTM |
| gi_188520580_gb_ACD58525.1 | 0.1   | 21 | 0.109 | 12 | 0.132 | 6  | 0.12  | 0.113 | N | 0.51 | SignalP-TM   |
| gi_188520581_gb_ACD58526.1 | 0.895 | 24 | 0.919 | 24 | 0.953 | 18 | 0.932 | 0.925 | Y | 0.57 | SignalP-noTM |
| gi_188520582_gb_ACD58527.1 | 0.148 | 21 | 0.145 | 21 | 0.279 | 4  | 0.17  | 0.157 | N | 0.57 | SignalP-noTM |
| gi_188520583_gb_ACD58528.1 | 0.127 | 48 | 0.148 | 11 | 0.32  | 2  | 0.206 | 0.175 | N | 0.57 | SignalP-noTM |
| gi_188520584_gb_ACD58529.1 | 0.112 | 50 | 0.11  | 50 | 0.118 | 41 | 0.085 | 0.098 | N | 0.57 | SignalP-noTM |
| gi_188520585_gb_ACD58530.1 | 0.111 | 40 | 0.113 | 14 | 0.154 | 2  | 0.129 | 0.121 | N | 0.57 | SignalP-noTM |
| gi_188520588_gb_ACD58533.1 | 0.147 | 60 | 0.111 | 11 | 0.139 | 4  | 0.123 | 0.117 | N | 0.57 | SignalP-noTM |
| gi_188520589_gb_ACD58534.1 | 0.107 | 21 | 0.108 | 40 | 0.136 | 34 | 0.1   | 0.104 | N | 0.57 | SignalP-noTM |
| gi_188520590_gb_ACD58535.1 | 0.207 | 27 | 0.175 | 27 | 0.238 | 22 | 0.146 | 0.161 | N | 0.57 | SignalP-noTM |
| gi_188520591_gb_ACD58536.1 | 0.111 | 63 | 0.129 | 24 | 0.194 | 17 | 0.152 | 0.139 | N | 0.57 | SignalP-noTM |
| gi_188520592_gb_ACD58538.1 | 0.114 | 67 | 0.106 | 43 | 0.137 | 10 | 0.101 | 0.104 | N | 0.57 | SignalP-noTM |
| gi_188520594_gb_ACD58539.1 | 0.106 | 10 | 0.123 | 20 | 0.19  | 9  | 0.143 | 0.132 | N | 0.57 | SignalP-noTM |
| gi_188520595_gb_ACD58540.1 | 0.101 | 50 | 0.114 | 15 | 0.152 | 13 | 0.126 | 0.12  | N | 0.57 | SignalP-noTM |

|          |          |          |          |                            |
|----------|----------|----------|----------|----------------------------|
| 0.102845 | 0.000711 | 0.157095 | 0.086684 | gi_188520426_gb_ACD58371.1 |
| 0.675244 | 0.287205 | 0.6673   | 0.54325  | gi_188520427_gb_ACD58372.1 |
| 0.179314 | 0.046619 | 0.235772 | 0.153902 | gi_188520428_gb_ACD58373.1 |
| 0.13717  | 0.064405 | 0.134703 | 0.112093 | gi_188520429_gb_ACD58374.1 |
| 0.089074 | 0.006587 | 0.111155 | 0.068939 | gi_188520432_gb_ACD58377.1 |
| 0.416052 | 0.219428 | 0.456609 | 0.36403  | gi_188520434_gb_ACD58379.1 |
| 0.362622 | 0.21738  | 0.437331 | 0.339111 | gi_188520435_gb_ACD58380.1 |
| 0.068116 | 0.027787 | 0.097704 | 0.064536 | gi_188520436_gb_ACD58381.1 |
| 0.060711 | 0.000809 | 0.097969 | 0.053163 | gi_188520437_gb_ACD58382.1 |
| 0.189233 | 0.156303 | 0.233617 | 0.193051 | gi_188520438_gb_ACD58383.1 |
| 0.105647 | 0.068498 | 0.123251 | 0.099132 | gi_188520439_gb_ACD58384.1 |
| 0.047834 | 0.027305 | 0.088588 | 0.054576 | gi_188520441_gb_ACD58386.1 |
| 0.201491 | 0.010825 | 0.254643 | 0.155653 | gi_188520442_gb_ACD58387.1 |
| 0.124881 | 0.037148 | 0.174509 | 0.112179 | gi_188520444_gb_ACD58389.1 |
| 0.075928 | 0.033862 | 0.118157 | 0.075982 | gi_188520445_gb_ACD58390.1 |
| 0.091788 | 0.126529 | 0.087145 | 0.101821 | gi_188520446_gb_ACD58391.1 |
| 0.163557 | 0.214839 | 0.122282 | 0.166893 | gi_188520447_gb_ACD58392.1 |
| 0.126861 | 0.076988 | 0.144427 | 0.116092 | gi_188520448_gb_ACD58393.1 |
| 0.915444 | 0.965243 | 0.830616 | 0.903768 | gi_188520451_gb_ACD58396.1 |
| 0.795597 | 0.348191 | 0.806121 | 0.64997  | gi_188520452_gb_ACD58397.1 |
| 0.135755 | 0.000385 | 0.108806 | 0.081649 | gi_188520454_gb_ACD58399.1 |
| 0.105931 | 0.014644 | 0.095868 | 0.072148 | gi_188520455_gb_ACD58400.1 |
| 0.221491 | 0.1065   | 0.234154 | 0.187382 | gi_188520456_gb_ACD58401.1 |
| 0.247871 | 0.629017 | 0.175375 | 0.350754 | gi_188520457_gb_ACD58402.1 |
| 0.067547 | 0.086907 | 0.156303 | 0.103586 | gi_188520458_gb_ACD58403.1 |
| 0.097176 | 0.029199 | 0.119413 | 0.081929 | gi_188520469_gb_ACD58414.1 |
| 0.324098 | 0.029627 | 0.282316 | 0.212014 | gi_188520481_gb_ACD58426.1 |
| 0.392218 | 0.973635 | 0.509749 | 0.625201 | gi_188520490_gb_ACD58435.1 |
| 0.08883  | 0.832716 | 0.157892 | 0.359813 | gi_188520491_gb_ACD58436.1 |
| 0.956596 | 0.988816 | 0.898803 | 0.947738 | gi_188520498_gb_ACD58443.1 |
| 0.134005 | 0.14629  | 0.092289 | 0.124195 | gi_188520502_gb_ACD58447.1 |
| 0.880587 | 0.976546 | 0.901766 | 0.919633 | gi_1                       |

|                           |       |    |       |    |       |    |       |       |   |      |              |
|---------------------------|-------|----|-------|----|-------|----|-------|-------|---|------|--------------|
| gj_188520596_gb_ACD585411 | 0.102 | 27 | 0.117 | 11 | 0.198 | 1  | 0.128 | 0.122 | N | 0.57 | SignalP-noTM |
| gj_188520597_gb_ACD585421 | 0.109 | 9  | 0.104 | 24 | 0.123 | 14 | 0.09  | 0.097 | N | 0.57 | SignalP-noTM |
| gj_188520598_gb_ACD585431 | 0.104 | 36 | 0.106 | 11 | 0.178 | 1  | 0.104 | 0.105 | N | 0.57 | SignalP-noTM |
| gj_188520601_gb_ACD585461 | 0.112 | 29 | 0.108 | 55 | 0.137 | 49 | 0.093 | 0.101 | N | 0.57 | SignalP-noTM |
| gj_188520604_gb_ACD585491 | 0.108 | 43 | 0.097 | 64 | 0.098 | 61 | 0.081 | 0.089 | N | 0.57 | SignalP-noTM |
| gj_188520605_gb_ACD585501 | 0.105 | 45 | 0.105 | 51 | 0.184 | 42 | 0.087 | 0.096 | N | 0.57 | SignalP-noTM |
| gj_188520606_gb_ACD585511 | 0.599 | 26 | 0.427 | 26 | 0.47  | 25 | 0.246 | 0.36  | N | 0.51 | SignalP-TM   |
| gj_188520610_gb_ACD585551 | 0.17  | 39 | 0.147 | 39 | 0.21  | 38 | 0.109 | 0.129 | N | 0.57 | SignalP-noTM |
| gj_188520611_gb_ACD585561 | 0.126 | 48 | 0.11  | 48 | 0.117 | 28 | 0.085 | 0.098 | N | 0.57 | SignalP-noTM |
| gj_188520612_gb_ACD585571 | 0.23  | 30 | 0.315 | 30 | 0.586 | 26 | 0.407 | 0.349 | N | 0.51 | SignalP-TM   |
| gj_188520613_gb_ACD585581 | 0.117 | 40 | 0.108 | 40 | 0.12  | 1  | 0.095 | 0.102 | N | 0.57 | SignalP-noTM |
| gj_188520614_gb_ACD585591 | 0.184 | 32 | 0.232 | 32 | 0.428 | 27 | 0.24  | 0.235 | N | 0.51 | SignalP-TM   |
| gj_188520615_gb_ACD585601 | 0.236 | 37 | 0.348 | 37 | 0.664 | 28 | 0.474 | 0.395 | N | 0.51 | SignalP-TM   |
| gj_188520619_gb_ACD585641 | 0.267 | 34 | 0.194 | 25 | 0.45  | 1  | 0.257 | 0.217 | N | 0.51 | SignalP-TM   |
| gj_188520624_gb_ACD585691 | 0.106 | 61 | 0.1   | 61 | 0.114 | 10 | 0.09  | 0.096 | N | 0.57 | SignalP-noTM |
| gj_188520625_gb_ACD585701 | 0.107 | 46 | 0.147 | 11 | 0.284 | 1  | 0.211 | 0.177 | N | 0.57 | SignalP-noTM |
| gj_188520627_gb_ACD585721 | 0.17  | 49 | 0.21  | 49 | 0.447 | 40 | 0.17  | 0.191 | N | 0.57 | SignalP-noTM |
| gj_188520628_gb_ACD585731 | 0.153 | 52 | 0.127 | 52 | 0.164 | 8  | 0.105 | 0.117 | N | 0.57 | SignalP-noTM |
| gj_188520630_gb_ACD585751 | 0.102 | 24 | 0.102 | 24 | 0.12  | 3  | 0.101 | 0.102 | N | 0.57 | SignalP-noTM |
| gj_188520631_gb_ACD585761 | 0.159 | 37 | 0.121 | 51 | 0.132 | 45 | 0.089 | 0.106 | N | 0.57 | SignalP-noTM |
| gj_188520634_gb_ACD585791 | 0.116 | 42 | 0.11  | 22 | 0.216 | 11 | 0.104 | 0.107 | N | 0.57 | SignalP-noTM |
| gj_188520636_gb_ACD585811 | 0.129 | 48 | 0.128 | 11 | 0.291 | 1  | 0.147 | 0.137 | N | 0.57 | SignalP-noTM |
| gj_188520638_gb_ACD585831 | 0.104 | 29 | 0.104 | 46 | 0.13  | 38 | 0.093 | 0.099 | N | 0.57 | SignalP-noTM |
| gj_188520639_gb_ACD585841 | 0.23  | 29 | 0.178 | 29 | 0.264 | 3  | 0.153 | 0.169 | N | 0.51 | SignalP-TM   |
| gj_188520641_gb_ACD585861 | 0.113 | 33 | 0.114 | 33 | 0.138 | 1  | 0.107 | 0.111 | N | 0.57 | SignalP-noTM |
| gj_188520642_gb_ACD585871 | 0.391 | 23 | 0.552 | 23 | 0.886 | 18 | 0.777 | 0.658 | Y | 0.57 | SignalP-noTM |
| gj_188520643_gb_ACD585881 | 0.134 | 30 | 0.111 | 30 | 0.174 | 53 | 0.081 | 0.097 | N | 0.57 | SignalP-noTM |
| gj_188520644_gb_ACD585891 | 0.107 | 30 | 0.101 | 11 | 0.133 | 1  | 0.098 | 0.099 | N | 0.57 | SignalP-noTM |
| gj_188520645_gb_ACD585901 | 0.127 | 20 | 0.113 | 20 | 0.141 | 9  | 0.097 | 0.106 | N | 0.57 | SignalP-noTM |
| gj_188520646_gb_ACD585911 | 0.11  | 62 | 0.117 | 38 | 0.156 | 30 | 0.107 | 0.112 | N | 0.57 | SignalP-noTM |
| gj_188520648_gb_ACD585931 | 0.138 | 47 | 0.145 | 47 | 0.205 | 37 | 0.12  | 0.133 | N | 0.57 | SignalP-noTM |
| gj_188520649_gb_ACD585941 | 0.114 | 31 | 0.144 | 15 | 0.335 | 13 | 0.19  | 0.166 | N | 0.57 | SignalP-noTM |
| gj_188520655_gb_ACD586001 | 0.113 | 22 | 0.144 | 13 | 0.284 | 11 | 0.208 | 0.174 | N | 0.57 | SignalP-noTM |
| gj_188520656_gb_ACD586011 | 0.126 | 39 | 0.106 | 39 | 0.12  | 8  | 0.088 | 0.097 | N | 0.57 | SignalP-noTM |
| gj_188520658_gb_ACD586031 | 0.119 | 39 | 0.107 | 39 | 0.108 | 17 | 0.085 | 0.097 | N | 0.57 | SignalP-noTM |
| gj_188520660_gb_ACD586051 | 0.155 | 31 | 0.144 | 31 | 0.192 | 6  | 0.149 | 0.146 | N | 0.57 | SignalP-noTM |
| gj_188520663_gb_ACD586081 | 0.106 | 38 | 0.106 | 66 | 0.129 | 1  | 0.105 | 0.106 | N | 0.57 | SignalP-noTM |
| gj_188520664_gb_ACD586091 | 0.776 | 17 | 0.722 | 17 | 0.821 | 15 | 0.687 | 0.706 | Y | 0.57 | SignalP-noTM |
| gj_188520668_gb_ACD586131 | 0.128 | 36 | 0.191 | 36 | 0.438 | 21 | 0.302 | 0.243 | N | 0.57 | SignalP-noTM |
| gj_188520669_gb_ACD586141 | 0.661 | 17 | 0.6   | 17 | 0.66  | 7  | 0.536 | 0.57  | N | 0.57 | SignalP-noTM |
| gj_188520670_gb_ACD586151 | 0.108 | 22 | 0.114 | 50 | 0.183 | 1  | 0.103 | 0.108 | N | 0.57 | SignalP-noTM |
| gj_188520671_gb_ACD586161 | 0.164 | 59 | 0.132 | 59 | 0.21  | 6  | 0.11  | 0.122 | N | 0.57 | SignalP-noTM |
| gj_188520672_gb_ACD586171 | 0.148 | 27 | 0.116 | 27 | 0.128 | 40 | 0.093 | 0.105 | N | 0.57 | SignalP-noTM |
| gj_188520673_gb_ACD586181 | 0.355 | 29 | 0.183 | 29 | 0.174 | 12 | 0.103 | 0.145 | N | 0.57 | SignalP-noTM |
| gj_188520674_gb_ACD586191 | 0.274 | 26 | 0.221 | 26 | 0.367 | 3  | 0.238 | 0.229 | N | 0.57 | SignalP-noTM |
| gj_188520675_gb_ACD586201 | 0.15  | 32 | 0.129 | 11 | 0.256 | 2  | 0.163 | 0.145 | N | 0.57 | SignalP-noTM |
| gj_188520676_gb_ACD586211 | 0.158 | 40 | 0.2   | 45 | 0.508 | 38 | 0.154 | 0.178 | N | 0.57 | SignalP-noTM |
| gj_188520677_gb_ACD586221 | 0.232 | 45 | 0.125 | 45 | 0.155 | 21 | 0.079 | 0.103 | N | 0.57 | SignalP-noTM |
| gj_188520678_gb_ACD586231 | 0.113 | 59 | 0.101 | 43 | 0.11  | 30 | 0.085 | 0.093 | N | 0.57 | SignalP-noTM |
| gj_188520679_gb_ACD586241 | 0.119 | 67 | 0.108 | 67 | 0.12  | 11 | 0.082 | 0.096 | N | 0.57 | SignalP-noTM |
| gj_188520680_gb_ACD586251 | 0.251 | 70 | 0.183 | 33 | 0.54  | 31 | 0.211 | 0.196 | N | 0.57 | SignalP-noTM |
| gj_188520681_gb_ACD586261 | 0.205 | 49 | 0.255 | 41 | 0.661 | 33 | 0.347 | 0.298 | N | 0.57 | SignalP-noTM |
| gj_188520682_gb_ACD586271 | 0.492 | 23 | 0.67  | 23 | 0.96  | 13 | 0.914 | 0.785 | Y | 0.57 | SignalP-noTM |
| gj_188520687_gb_ACD586321 | 0.101 | 44 | 0.1   | 44 | 0.102 | 35 | 0.089 | 0.094 | N | 0.57 | SignalP-noTM |
| gj_188520688_gb_ACD586331 | 0.133 | 51 | 0.135 | 32 | 0.205 | 25 | 0.134 | 0.135 | N | 0.51 | SignalP-TM   |
| gj_188520689_gb_ACD586341 | 0.147 | 48 | 0.147 | 18 | 0.248 | 14 | 0.205 | 0.168 | N | 0.51 | SignalP-TM   |
| gj_188520693_gb_ACD586381 | 0.104 | 34 | 0.101 | 34 | 0.109 | 22 | 0.086 | 0.094 | N | 0.57 | SignalP-noTM |
| gj_188520694_gb_ACD586391 | 0.139 | 17 | 0.208 | 11 | 0.651 | 1  | 0.409 | 0.303 | N | 0.57 | SignalP-noTM |
| gj_188520695_gb_ACD586401 | 0.251 | 41 | 0.168 | 24 | 0.336 | 1  | 0.215 | 0.19  | N | 0.57 | SignalP-noTM |
| gj_188520696_gb_ACD586431 | 0.175 | 22 | 0.333 | 22 | 0.866 | 19 | 0.701 | 0.506 | N | 0.57 | SignalP-noTM |
| gj_188520699_gb_ACD586441 | 0.106 | 25 | 0.132 | 13 | 0.24  | 5  | 0.178 | 0.153 | N | 0.57 | SignalP-noTM |
| gj_188520700_gb_ACD586451 | 0.107 | 33 | 0.104 | 68 | 0.134 | 58 | 0.077 | 0.094 | N | 0.51 | SignalP-TM   |
| gj_188520701_gb_ACD586461 | 0.171 | 37 | 0.163 | 37 | 0.289 | 3  | 0.185 | 0.171 | N | 0.51 | SignalP-TM   |
| gj_188520702_gb_ACD586471 | 0.115 | 17 | 0.138 | 17 | 0.245 | 2  | 0.15  | 0.143 | N | 0.51 | SignalP-TM   |
| gj_188520709_gb_ACD586541 | 0.109 | 36 | 0.138 | 12 | 0.275 | 3  | 0.188 | 0.162 | N | 0.57 | SignalP-noTM |
| gj_188520710_gb_ACD586551 | 0.109 | 19 | 0.117 | 12 | 0.163 | 4  | 0.137 | 0.126 | N | 0.57 | SignalP-noTM |
| gj_188520712_gb_ACD586571 | 0.151 | 23 | 0.17  | 11 | 0.405 | 1  | 0.269 | 0.217 | N | 0.57 | SignalP-noTM |
| gj_188520713_gb_ACD586581 | 0.161 | 60 | 0.128 | 60 | 0.179 | 1  | 0.113 | 0.121 | N | 0.57 | SignalP-noTM |
| gj_188520714_gb_ACD586591 | 0.185 | 22 | 0.392 | 22 | 0.95  | 10 | 0.832 | 0.599 | Y | 0.57 | SignalP-noTM |
| gj_188520715_gb_ACD586601 | 0.14  | 24 | 0.14  | 24 | 0.236 | 1  | 0.159 | 0.149 | N | 0.57 | SignalP-noTM |
| gj_188520716_gb_ACD586611 | 0.543 | 27 | 0.72  | 27 | 0.982 | 23 | 0.939 | 0.823 | Y | 0.57 | SignalP-noTM |
| gj_188520724_gb_ACD586691 | 0.875 | 27 | 0.866 | 27 | 0.966 | 15 | 0.884 | 0.875 | Y | 0.57 | SignalP-noTM |
| gj_188520725_gb_ACD586701 | 0.104 | 70 | 0.108 | 35 | 0.131 | 13 | 0.107 | 0.108 | N | 0.57 | SignalP-noTM |
| gj_188520726_gb_ACD586711 | 0.217 | 26 | 0.392 | 26 | 0.858 | 8  | 0.76  | 0.565 | N | 0.57 | SignalP-noTM |
| gj_188520729_gb_ACD586741 | 0.105 | 45 | 0.105 | 51 | 0.184 | 42 | 0.087 | 0.096 | N | 0.57 | SignalP-noTM |
| gj_188520730_gb_ACD586751 | 0.127 | 48 | 0.126 | 42 | 0.193 | 41 | 0.101 | 0.114 | N | 0.57 | SignalP-noTM |
| gj_188520733_gb_ACD586781 | 0.151 | 31 | 0.131 | 31 | 0.13  | 25 | 0.095 | 0.114 | N | 0.57 | SignalP-noTM |
| gj_188520736_gb_ACD586811 | 0.125 | 21 | 0.12  | 21 | 0.159 | 1  | 0.107 | 0.114 | N | 0.57 | SignalP-noTM |

|          |          |          |          |                           |
|----------|----------|----------|----------|---------------------------|
| 0.709715 | 0.896619 | 0.561192 | 0.723509 | gj_188520596_gb_ACD585411 |
| 0.153553 | 0.063328 | 0.230942 | 0.149274 | gj_188520597_gb_ACD585421 |
| 0.069892 | 0.00054  | 0.138955 | 0.068826 | gj_188520598_gb_ACD585431 |
| 0.266784 | 0.97902  | 0.248991 | 0.498265 | gj_188520601_gb_ACD585461 |
| 0.359163 | 0.879001 | 0.461824 | 0.566663 | gj_188520604_gb_ACD585491 |
| 0.109097 | 0.031401 | 0.129544 | 0.090014 | gj_188520605_gb_ACD585501 |
| 0.184673 | 0.042656 | 0.262116 | 0.163148 | gj_188520606_gb_ACD585511 |
| 0.170654 | 0.031129 | 0.224088 | 0.141957 | gj_188520610_gb_ACD585551 |
| 0.109975 | 0.022843 | 0.144056 | 0.092291 | gj_188520611_gb_ACD585561 |
| 0.95585  | 0.991049 | 0.921507 | 0.956135 | gj_188520612_gb_ACD585571 |
| 0.114762 | 0.114457 | 0.107072 | 0.112097 | gj_188520613_gb_ACD585581 |
| 0.736722 | 0.842108 | 0.697833 | 0.758888 | gj_188520614_gb_ACD585591 |
| 0.401553 | 0.228289 | 0.520988 | 0.38361  | gj_188520615_gb_ACD585601 |
| 0.125868 | 0.110563 | 0.199089 | 0.145173 | gj_188520619_gb_ACD585641 |
| 0.881843 | 0.999063 | 0.829346 | 0.903417 | gj_188520624_gb_ACD585691 |
| 0.091289 | 0.02186  | 0.140397 | 0.084515 | gj_188520625_gb_ACD585701 |
| 0.191081 | 0.177994 | 0.180643 | 0.183239 | gj_188520627_gb_ACD585721 |
| 0.094576 | 0.103123 | 0.074675 | 0.090791 | gj_188520628_gb_ACD585731 |
| 0.119413 | 0.066422 | 0.121639 | 0.102491 | gj_188520630_gb_ACD585751 |
| 0.564145 | 0.488002 | 0.617039 | 0.556395 | gj_188520631_gb_ACD585761 |
| 0.894636 | 0.990529 | 0.840506 | 0.908557 | gj_188520634_gb_ACD585791 |
| 0.099571 | 0.043647 | 0.130903 | 0.091374 | gj_188520636_gb_ACD585811 |
| 0.150077 | 0.227233 | 0.087864 | 0.155058 | gj_188520638_gb_ACD585831 |
| 0.154335 | 0.117533 | 0.172787 | 0.148218 | gj_188520639_gb_ACD585841 |
| 0.929955 | 0.996942 | 0.806121 | 0.911006 | gj_188520641_gb_ACD585861 |
| 0.466301 | 0.869097 | 0.611352 | 0.648917 | gj_188520642_gb_ACD585871 |
| 0.069892 | 0.003714 | 0.100924 | 0.057207 | gj_188520643_gb_ACD585881 |
| 0.187399 | 0.119729 | 0.228818 | 0.178649 | gj_188520644_gb_ACD585891 |
| 0.112946 | 0.115679 | 0.145916 | 0.124847 | gj_188520645_gb_ACD585901 |
| 0.461079 | 0.06985  | 0.559714 | 0.363548 | gj_188520646_gb_ACD585911 |
| 0.115373 | 0.348191 | 0.101197 | 0.188254 | gj_188520648_gb_ACD585931 |
| 0.936672 | 0.836443 | 0.934869 | 0.902661 | gj_188520649_gb_ACD585941 |
| 0.668631 | 0.863539 | 0.78968  | 0.77395  | gj_188520655_gb_ACD586001 |
| 0.255213 |          |          |          |                           |

|                            |       |    |       |    |       |    |       |       |   |      |              |  |
|----------------------------|-------|----|-------|----|-------|----|-------|-------|---|------|--------------|--|
| gj_188520737_gb_ACD58682_1 | 0.324 | 51 | 0.201 | 51 | 0.214 | 47 | 0.084 | 0.146 | N | 0.57 | SignalP-noTM |  |
| gj_188520738_gb_ACD58683_1 | 0.114 | 34 | 0.121 | 15 | 0.183 | 7  | 0.145 | 0.132 | N | 0.57 | SignalP-noTM |  |
| gj_188520739_gb_ACD58684_1 | 0.162 | 22 | 0.227 | 16 | 0.431 | 1  | 0.371 | 0.28  | N | 0.51 | SignalP-ITM  |  |
| gj_188520741_gb_ACD58686_1 | 0.239 | 24 | 0.26  | 24 | 0.414 | 22 | 0.263 | 0.262 | N | 0.51 | SignalP-ITM  |  |
| gj_188520742_gb_ACD58687_1 | 0.123 | 48 | 0.129 | 24 | 0.235 | 19 | 0.143 | 0.134 | N | 0.51 | SignalP-ITM  |  |
| gj_188520744_gb_ACD58689_1 | 0.113 | 28 | 0.124 | 51 | 0.287 | 48 | 0.112 | 0.118 | N | 0.57 | SignalP-noTM |  |
| gj_188520745_gb_ACD58690_1 | 0.138 | 31 | 0.157 | 17 | 0.246 | 2  | 0.195 | 0.175 | N | 0.57 | SignalP-noTM |  |
| gj_188520746_gb_ACD58691_1 | 0.105 | 25 | 0.106 | 32 | 0.16  | 1  | 0.108 | 0.107 | N | 0.57 | SignalP-noTM |  |
| gj_188520749_gb_ACD58694_1 | 0.111 | 24 | 0.129 | 54 | 0.232 | 49 | 0.101 | 0.116 | N | 0.57 | SignalP-noTM |  |
| gj_188520752_gb_ACD58697_1 | 0.26  | 33 | 0.251 | 33 | 0.507 | 6  | 0.338 | 0.292 | N | 0.57 | SignalP-noTM |  |
| gj_188520755_gb_ACD58700_1 | 0.386 | 19 | 0.374 | 19 | 0.501 | 3  | 0.396 | 0.385 | N | 0.57 | SignalP-noTM |  |
| gj_188520762_gb_ACD58707_1 | 0.34  | 20 | 0.407 | 20 | 0.69  | 1  | 0.534 | 0.467 | N | 0.57 | SignalP-noTM |  |
| gj_188520765_gb_ACD58710_1 | 0.165 | 37 | 0.147 | 37 | 0.16  | 35 | 0.111 | 0.13  | N | 0.57 | SignalP-noTM |  |
| gj_188520769_gb_ACD58714_1 | 0.856 | 22 | 0.856 | 22 | 0.922 | 2  | 0.876 | 0.866 | Y | 0.57 | SignalP-noTM |  |
| gj_188520770_gb_ACD58715_1 | 0.118 | 46 | 0.103 | 28 | 0.117 | 20 | 0.072 | 0.088 | N | 0.57 | SignalP-noTM |  |
| gj_188520771_gb_ACD58716_1 | 0.145 | 33 | 0.138 | 33 | 0.29  | 1  | 0.136 | 0.137 | N | 0.57 | SignalP-noTM |  |
| gj_188520772_gb_ACD58717_1 | 0.329 | 27 | 0.487 | 27 | 0.947 | 17 | 0.812 | 0.64  | Y | 0.57 | SignalP-noTM |  |
| gj_188520774_gb_ACD58719_1 | 0.131 | 64 | 0.125 | 11 | 0.195 | 1  | 0.155 | 0.139 | N | 0.57 | SignalP-noTM |  |
| gj_188520775_gb_ACD58720_1 | 0.118 | 26 | 0.11  | 50 | 0.135 | 38 | 0.095 | 0.103 | N | 0.57 | SignalP-noTM |  |
| gj_188520776_gb_ACD58721_1 | 0.12  | 28 | 0.118 | 28 | 0.207 | 25 | 0.102 | 0.11  | N | 0.57 | SignalP-noTM |  |
| gj_188520777_gb_ACD58722_1 | 0.16  | 20 | 0.116 | 11 | 0.236 | 2  | 0.131 | 0.123 | N | 0.57 | SignalP-noTM |  |
| gj_188520778_gb_ACD58723_1 | 0.352 | 30 | 0.277 | 30 | 0.464 | 15 | 0.284 | 0.28  | N | 0.57 | SignalP-noTM |  |
| gj_188520779_gb_ACD58724_1 | 0.233 | 20 | 0.206 | 20 | 0.408 | 4  | 0.247 | 0.225 | N | 0.57 | SignalP-noTM |  |
| gj_188520780_gb_ACD58725_1 | 0.117 | 24 | 0.101 | 70 | 0.117 | 33 | 0.084 | 0.093 | N | 0.57 | SignalP-noTM |  |
| gj_188520787_gb_ACD58732_1 | 0.104 | 18 | 0.226 | 11 | 0.674 | 1  | 0.516 | 0.333 | N | 0.51 | SignalP-ITM  |  |
| gj_188520799_gb_ACD58744_1 | 0.115 | 20 | 0.129 | 20 | 0.183 | 9  | 0.136 | 0.132 | N | 0.57 | SignalP-noTM |  |
| gj_188520800_gb_ACD58745_1 | 0.12  | 22 | 0.106 | 22 | 0.119 | 16 | 0.082 | 0.095 | N | 0.57 | SignalP-noTM |  |
| gj_188520801_gb_ACD58746_1 | 0.102 | 60 | 0.133 | 11 | 0.34  | 1  | 0.153 | 0.142 | N | 0.57 | SignalP-noTM |  |
| gj_188520802_gb_ACD58747_1 | 0.178 | 42 | 0.14  | 42 | 0.168 | 41 | 0.103 | 0.122 | N | 0.57 | SignalP-noTM |  |
| gj_188520803_gb_ACD58748_1 | 0.128 | 54 | 0.159 | 16 | 0.298 | 11 | 0.254 | 0.203 | N | 0.57 | SignalP-noTM |  |
| gj_188520804_gb_ACD58749_1 | 0.123 | 27 | 0.129 | 32 | 0.22  | 1  | 0.119 | 0.125 | N | 0.51 | SignalP-ITM  |  |
| gj_188520805_gb_ACD58750_1 | 0.142 | 29 | 0.245 | 12 | 0.645 | 10 | 0.609 | 0.416 | N | 0.57 | SignalP-noTM |  |
| gj_188520808_gb_ACD58753_1 | 0.123 | 28 | 0.145 | 11 | 0.298 | 1  | 0.197 | 0.169 | N | 0.57 | SignalP-noTM |  |
| gj_188520809_gb_ACD58754_1 | 0.137 | 27 | 0.145 | 12 | 0.265 | 1  | 0.209 | 0.175 | N | 0.57 | SignalP-noTM |  |
| gj_188520810_gb_ACD58755_1 | 0.277 | 24 | 0.488 | 24 | 0.969 | 9  | 0.899 | 0.681 | Y | 0.57 | SignalP-noTM |  |
| gj_188520811_gb_ACD58756_1 | 0.109 | 67 | 0.107 | 12 | 0.149 | 2  | 0.116 | 0.111 | N | 0.57 | SignalP-noTM |  |
| gj_188520812_gb_ACD58757_1 | 0.108 | 63 | 0.111 | 38 | 0.185 | 37 | 0.097 | 0.104 | N | 0.57 | SignalP-noTM |  |
| gj_188520813_gb_ACD58758_1 | 0.106 | 25 | 0.103 | 11 | 0.141 | 2  | 0.104 | 0.103 | N | 0.57 | SignalP-noTM |  |
| gj_188520814_gb_ACD58759_1 | 0.17  | 35 | 0.147 | 35 | 0.333 | 34 | 0.109 | 0.129 | N | 0.57 | SignalP-noTM |  |
| gj_188520821_gb_ACD58766_1 | 0.288 | 28 | 0.203 | 28 | 0.268 | 8  | 0.184 | 0.194 | N | 0.57 | SignalP-noTM |  |
| gj_188520822_gb_ACD58767_1 | 0.101 | 52 | 0.1   | 70 | 0.117 | 33 | 0.092 | 0.096 | N | 0.57 | SignalP-noTM |  |
| gj_188520826_gb_ACD58771_1 | 0.123 | 40 | 0.122 | 40 | 0.144 | 44 | 0.107 | 0.115 | N | 0.57 | SignalP-noTM |  |
| gj_188520827_gb_ACD58772_1 | 0.141 | 25 | 0.189 | 18 | 0.456 | 5  | 0.34  | 0.26  | N | 0.57 | SignalP-noTM |  |
| gj_188520830_gb_ACD58775_1 | 0.158 | 25 | 0.139 | 25 | 0.22  | 2  | 0.142 | 0.14  | N | 0.57 | SignalP-noTM |  |
| gj_188520831_gb_ACD58776_1 | 0.206 | 49 | 0.136 | 49 | 0.207 | 11 | 0.119 | 0.128 | N | 0.57 | SignalP-noTM |  |
| gj_188520832_gb_ACD58777_1 | 0.125 | 40 | 0.154 | 11 | 0.347 | 1  | 0.235 | 0.192 | N | 0.57 | SignalP-noTM |  |
| gj_188520837_gb_ACD58782_1 | 0.151 | 55 | 0.226 | 55 | 0.424 | 46 | 0.219 | 0.224 | N | 0.51 | SignalP-ITM  |  |
| gj_188520838_gb_ACD58783_1 | 0.119 | 18 | 0.275 | 18 | 0.773 | 1  | 0.649 | 0.451 | N | 0.57 | SignalP-noTM |  |
| gj_188520844_gb_ACD58789_1 | 0.131 | 24 | 0.127 | 13 | 0.168 | 10 | 0.137 | 0.132 | N | 0.57 | SignalP-noTM |  |
| gj_188520847_gb_ACD58792_1 | 0.117 | 25 | 0.152 | 18 | 0.238 | 16 | 0.202 | 0.175 | N | 0.57 | SignalP-noTM |  |
| gj_188520850_gb_ACD58795_1 | 0.128 | 29 | 0.122 | 29 | 0.165 | 50 | 0.097 | 0.11  | N | 0.57 | SignalP-noTM |  |
| gj_188520851_gb_ACD58796_1 | 0.136 | 38 | 0.111 | 38 | 0.128 | 37 | 0.079 | 0.096 | N | 0.57 | SignalP-noTM |  |
| gj_188520852_gb_ACD58797_1 | 0.168 | 47 | 0.141 | 47 | 0.368 | 7  | 0.135 | 0.138 | N | 0.57 | SignalP-noTM |  |
| gj_188520853_gb_ACD58798_1 | 0.199 | 35 | 0.166 | 35 | 0.31  | 25 | 0.122 | 0.145 | N | 0.57 | SignalP-noTM |  |
| gj_188520854_gb_ACD58799_1 | 0.098 | 25 | 0.162 | 11 | 0.348 | 5  | 0.276 | 0.204 | N | 0.51 | SignalP-ITM  |  |
| gj_188520855_gb_ACD58800_1 | 0.114 | 21 | 0.118 | 37 | 0.171 | 30 | 0.108 | 0.113 | N | 0.57 | SignalP-noTM |  |
| gj_188520856_gb_ACD58801_1 | 0.219 | 37 | 0.269 | 18 | 0.409 | 14 | 0.298 | 0.283 | N | 0.57 | SignalP-noTM |  |
| gj_188520857_gb_ACD58802_1 | 0.147 | 17 | 0.159 | 39 | 0.405 | 32 | 0.179 | 0.168 | N | 0.57 | SignalP-noTM |  |
| gj_188520858_gb_ACD58803_1 | 0.123 | 46 | 0.134 | 46 | 0.229 | 44 | 0.135 | 0.135 | N | 0.57 | SignalP-noTM |  |
| gj_188520859_gb_ACD58804_1 | 0.246 | 30 | 0.237 | 13 | 0.734 | 12 | 0.518 | 0.369 | N | 0.57 | SignalP-noTM |  |
| gj_188520860_gb_ACD58805_1 | 0.172 | 28 | 0.161 | 28 | 0.278 | 26 | 0.166 | 0.163 | N | 0.57 | SignalP-noTM |  |
| gj_188520861_gb_ACD58806_1 | 0.107 | 35 | 0.106 | 47 | 0.138 | 44 | 0.09  | 0.098 | N | 0.57 | SignalP-noTM |  |
| gj_188520862_gb_ACD58807_1 | 0.199 | 38 | 0.134 | 13 | 0.211 | 2  | 0.179 | 0.155 | N | 0.57 | SignalP-noTM |  |
| gj_188520864_gb_ACD58809_1 | 0.109 | 36 | 0.119 | 25 | 0.186 | 19 | 0.138 | 0.128 | N | 0.57 | SignalP-noTM |  |
| gj_188520866_gb_ACD58811_1 | 0.126 | 25 | 0.142 | 17 | 0.24  | 9  | 0.189 | 0.164 | N | 0.57 | SignalP-noTM |  |
| gj_188520867_gb_ACD58812_1 | 0.125 | 52 | 0.24  | 11 | 0.691 | 4  | 0.6   | 0.41  | N | 0.57 | SignalP-noTM |  |
| gj_188520869_gb_ACD58814_1 | 0.104 | 27 | 0.138 | 12 | 0.231 | 2  | 0.189 | 0.162 | N | 0.57 | SignalP-noTM |  |
| gj_188520870_gb_ACD58815_1 | 0.277 | 33 | 0.179 | 33 | 0.168 | 32 | 0.109 | 0.146 | N | 0.57 | SignalP-noTM |  |
| gj_188520872_gb_ACD58817_1 | 0.102 | 41 | 0.131 | 19 | 0.249 | 12 | 0.134 | 0.133 | N | 0.57 | SignalP-noTM |  |
| gj_188520874_gb_ACD58819_1 | 0.116 | 12 | 0.134 | 12 | 0.18  | 9  | 0.152 | 0.141 | N | 0.51 | SignalP-ITM  |  |
| gj_188520875_gb_ACD58820_1 | 0.128 | 20 | 0.134 | 20 | 0.197 | 1  | 0.143 | 0.137 | N | 0.51 | SignalP-ITM  |  |
| gj_188520877_gb_ACD58822_1 | 0.141 | 7  | 0.1   | 44 | 0.119 | 40 | 0.087 | 0.095 | N | 0.51 | SignalP-ITM  |  |
| gj_188520878_gb_ACD58823_1 | 0.226 | 38 | 0.139 | 38 | 0.141 | 17 | 0.089 | 0.116 | N | 0.57 | SignalP-noTM |  |
| gj_188520879_gb_ACD58824_1 | 0.103 | 44 | 0.111 | 30 | 0.154 | 1  | 0.112 | 0.115 | N | 0.57 | SignalP-noTM |  |
| gj_188520882_gb_ACD58827_1 | 0.116 | 41 | 0.139 | 41 | 0.3   | 35 | 0.108 | 0.125 | N | 0.57 | SignalP-noTM |  |
| gj_188520883_gb_ACD58828_1 | 0.449 | 26 | 0.67  | 26 | 0.967 | 16 | 0.932 | 0.793 | Y | 0.57 | SignalP-noTM |  |
| gj_188520884_gb_ACD58829_1 | 0.356 | 24 | 0.288 | 24 | 0.453 | 14 | 0.237 | 0.264 | N | 0.57 | SignalP-noTM |  |
| gj_188520885_gb_ACD58830_1 | 0.105 | 40 | 0.1   | 11 | 0.165 | 2  | 0.095 | 0.098 | N | 0.57 | SignalP-noTM |  |

|          |          |          |          |                            |
|----------|----------|----------|----------|----------------------------|
| 0.116294 | 0.29713  | 0.080913 | 0.164779 | gj_188520737_gb_ACD58682_1 |
| 0.077629 | 0.027305 | 0.090298 | 0.065077 | gj_188520738_gb_ACD58683_1 |
| 0.091538 | 0.003113 | 0.126529 | 0.073727 | gj_188520739_gb_ACD58684_1 |
| 0.106786 | 0.021796 | 0.13193  | 0.086837 | gj_188520741_gb_ACD58686_1 |
| 0.101744 | 0.125538 | 0.113247 | 0.11351  | gj_188520742_gb_ACD58687_1 |
| 0.095349 | 0.048939 | 0.128869 | 0.091052 | gj_188520744_gb_ACD58689_1 |
| 0.271505 | 0.246754 | 0.352287 | 0.290182 | gj_188520745_gb_ACD58690_1 |
| 0.752688 | 0.606351 | 0.907459 | 0.755499 | gj_188520746_gb_ACD58691_1 |
| 0.129882 | 0.008535 | 0.137525 | 0.091981 | gj_188520749_gb_ACD58694_1 |
| 0.658586 | 0.408783 | 0.737884 | 0.601751 | gj_188520752_gb_ACD58697_1 |
| 0.236855 | 0.021227 | 0.341414 | 0.199832 | gj_188520755_gb_ACD58700_1 |
| 0.653849 | 0.215853 | 0.660607 | 0.510103 | gj_188520762_gb_ACD58707_1 |
| 0.068881 | 0.051077 | 0.116912 | 0.078957 | gj_188520765_gb_ACD58710_1 |
| 0.955212 | 0.999564 | 0.931884 | 0.96222  | gj_188520769_gb_ACD58714_1 |
| 0.129206 | 0.026211 | 0.184222 | 0.113213 | gj_188520770_gb_ACD58715_1 |
| 0.630416 | 0.094319 | 0.647713 | 0.457483 | gj_188520771_gb_ACD58716_1 |
| 0.624806 | 0.344117 | 0.734973 | 0.567965 | gj_188520772_gb_ACD58717_1 |
| 0.091538 | 0.040272 | 0.116912 | 0.082907 | gj_188520774_gb_ACD58719_1 |
| 0.124227 | 0.073237 | 0.129206 | 0.10889  | gj_188520775_gb_ACD58720_1 |
| 0.069655 | 0.038679 | 0.117222 | 0.075185 | gj_188520776_gb_ACD58721_1 |
| 0.837671 | 0.999731 | 0.68568  | 0.841027 | gj_188520777_gb_ACD58722_1 |
| 0.145542 | 0.169806 | 0.128532 | 0.14796  | gj_188520778_gb_ACD58723_1 |
| 0.103958 | 0.155907 | 0.102569 | 0.120811 | gj_188520779_gb_ACD58724_1 |
| 0.080247 | 0.047156 | 0.096914 | 0.074772 | gj_188520780_gb_ACD58725_1 |
| 0.427759 | 0.969851 | 0.331369 | 0.576326 | gj_188520787_gb_ACD58732_1 |
| 0.392218 | 0.729088 | 0.364705 | 0.495337 | gj_188520799_gb_ACD58744_1 |
| 0.049784 | 0.020016 | 0.091788 | 0.053863 | gj_188520800_gb_ACD58745_1 |
| 0.600608 | 0.727307 | 0.737884 | 0.6886   | gj_188520801_gb_ACD58746_1 |
| 0.357094 | 0.92129  | 0.369584 | 0.549233 | gj_188520802_gb_ACD58747_1 |
| 0.165205 | 0.069074 |          |          |                            |

|                            |       |    |       |    |       |    |       |       |   |      |              |
|----------------------------|-------|----|-------|----|-------|----|-------|-------|---|------|--------------|
| gj_188520888_gb_ACD58833.1 | 0.112 | 21 | 0.146 | 11 | 0.288 | 1  | 0.205 | 0.174 | N | 0.57 | SignalP-noTM |
| gj_188520889_gb_ACD58834.1 | 0.24  | 44 | 0.216 | 44 | 0.331 | 42 | 0.147 | 0.184 | N | 0.57 | SignalP-noTM |
| gj_188520892_gb_ACD58837.1 | 0.112 | 60 | 0.103 | 38 | 0.119 | 35 | 0.081 | 0.092 | N | 0.57 | SignalP-noTM |
| gj_188520893_gb_ACD58838.1 | 0.148 | 23 | 0.172 | 23 | 0.393 | 11 | 0.209 | 0.189 | N | 0.57 | SignalP-noTM |
| gj_188520894_gb_ACD58839.1 | 0.136 | 23 | 0.115 | 23 | 0.161 | 41 | 0.092 | 0.104 | N | 0.57 | SignalP-noTM |
| gj_188520895_gb_ACD58840.1 | 0.131 | 21 | 0.104 | 42 | 0.129 | 40 | 0.077 | 0.091 | N | 0.57 | SignalP-noTM |
| gj_188520896_gb_ACD58841.1 | 0.175 | 33 | 0.147 | 33 | 0.215 | 32 | 0.11  | 0.13  | N | 0.57 | SignalP-noTM |
| gj_188520898_gb_ACD58843.1 | 0.133 | 43 | 0.103 | 43 | 0.1   | 39 | 0.059 | 0.082 | N | 0.57 | SignalP-noTM |
| gj_188520902_gb_ACD58847.1 | 0.125 | 53 | 0.147 | 11 | 0.282 | 5  | 0.22  | 0.181 | N | 0.57 | SignalP-noTM |
| gj_188520904_gb_ACD58849.1 | 0.202 | 12 | 0.188 | 12 | 0.349 | 10 | 0.175 | 0.182 | N | 0.57 | SignalP-noTM |
| gj_188520908_gb_ACD58853.1 | 0.099 | 65 | 0.102 | 16 | 0.147 | 10 | 0.103 | 0.102 | N | 0.57 | SignalP-noTM |
| gj_188520909_gb_ACD58854.1 | 0.127 | 60 | 0.106 | 38 | 0.136 | 1  | 0.088 | 0.098 | N | 0.57 | SignalP-noTM |
| gj_188520912_gb_ACD58857.1 | 0.136 | 38 | 0.112 | 38 | 0.129 | 37 | 0.093 | 0.103 | N | 0.57 | SignalP-noTM |
| gj_188520914_gb_ACD58859.1 | 0.117 | 67 | 0.114 | 27 | 0.144 | 11 | 0.123 | 0.118 | N | 0.57 | SignalP-noTM |
| gj_188520915_gb_ACD58860.1 | 0.171 | 23 | 0.346 | 23 | 0.831 | 18 | 0.701 | 0.513 | N | 0.57 | SignalP-noTM |
| gj_188520916_gb_ACD58861.1 | 0.134 | 21 | 0.112 | 21 | 0.135 | 30 | 0.096 | 0.105 | N | 0.57 | SignalP-noTM |
| gj_188520917_gb_ACD58862.1 | 0.152 | 24 | 0.174 | 11 | 0.433 | 1  | 0.281 | 0.224 | N | 0.57 | SignalP-noTM |
| gj_188520918_gb_ACD58863.1 | 0.125 | 59 | 0.118 | 11 | 0.215 | 1  | 0.139 | 0.128 | N | 0.57 | SignalP-noTM |
| gj_188520919_gb_ACD58864.1 | 0.16  | 27 | 0.124 | 27 | 0.129 | 53 | 0.08  | 0.103 | N | 0.57 | SignalP-noTM |
| gj_188520920_gb_ACD58865.1 | 0.185 | 37 | 0.211 | 37 | 0.4   | 29 | 0.167 | 0.195 | N | 0.51 | SignalP-TM   |
| gj_188520921_gb_ACD58866.1 | 0.204 | 24 | 0.13  | 24 | 0.105 | 23 | 0.081 | 0.107 | N | 0.57 | SignalP-noTM |
| gj_188520922_gb_ACD58867.1 | 0.125 | 31 | 0.14  | 11 | 0.303 | 4  | 0.211 | 0.174 | N | 0.57 | SignalP-noTM |
| gj_188520923_gb_ACD58868.1 | 0.129 | 41 | 0.109 | 41 | 0.117 | 23 | 0.087 | 0.099 | N | 0.57 | SignalP-noTM |
| gj_188520926_gb_ACD58871.1 | 0.113 | 44 | 0.106 | 68 | 0.124 | 62 | 0.088 | 0.098 | N | 0.57 | SignalP-noTM |
| gj_188520929_gb_ACD58874.1 | 0.157 | 21 | 0.143 | 21 | 0.227 | 1  | 0.146 | 0.144 | N | 0.57 | SignalP-noTM |
| gj_188520930_gb_ACD58875.1 | 0.146 | 31 | 0.166 | 31 | 0.277 | 35 | 0.155 | 0.162 | N | 0.51 | SignalP-TM   |
| gj_188520940_gb_ACD58885.1 | 0.103 | 54 | 0.104 | 19 | 0.153 | 8  | 0.101 | 0.103 | N | 0.57 | SignalP-noTM |
| gj_188520942_gb_ACD58887.1 | 0.223 | 43 | 0.152 | 43 | 0.138 | 5  | 0.106 | 0.13  | N | 0.57 | SignalP-noTM |
| gj_188520943_gb_ACD58888.1 | 0.141 | 43 | 0.158 | 17 | 0.323 | 14 | 0.238 | 0.187 | N | 0.51 | SignalP-TM   |
| gj_188520944_gb_ACD58889.1 | 0.198 | 55 | 0.239 | 55 | 0.418 | 50 | 0.178 | 0.216 | N | 0.51 | SignalP-TM   |
| gj_188520945_gb_ACD58890.1 | 0.131 | 31 | 0.139 | 11 | 0.241 | 3  | 0.199 | 0.167 | N | 0.57 | SignalP-noTM |
| gj_188520946_gb_ACD58891.1 | 0.22  | 24 | 0.293 | 24 | 0.686 | 4  | 0.497 | 0.369 | N | 0.51 | SignalP-TM   |
| gj_188520947_gb_ACD58892.1 | 0.115 | 41 | 0.107 | 41 | 0.113 | 38 | 0.09  | 0.099 | N | 0.57 | SignalP-noTM |
| gj_188520948_gb_ACD58893.1 | 0.116 | 37 | 0.159 | 11 | 0.335 | 1  | 0.244 | 0.199 | N | 0.57 | SignalP-noTM |
| gj_188520949_gb_ACD58894.1 | 0.446 | 22 | 0.293 | 22 | 0.361 | 6  | 0.244 | 0.275 | N | 0.51 | SignalP-TM   |
| gj_188520950_gb_ACD58895.1 | 0.127 | 33 | 0.134 | 33 | 0.247 | 15 | 0.158 | 0.143 | N | 0.51 | SignalP-TM   |
| gj_188520951_gb_ACD58896.1 | 0.111 | 24 | 0.105 | 24 | 0.142 | 1  | 0.096 | 0.101 | N | 0.57 | SignalP-noTM |
| gj_188520952_gb_ACD58897.1 | 0.253 | 29 | 0.151 | 29 | 0.191 | 35 | 0.087 | 0.121 | N | 0.57 | SignalP-noTM |
| gj_188520956_gb_ACD58901.1 | 0.181 | 22 | 0.209 | 22 | 0.371 | 7  | 0.277 | 0.234 | N | 0.51 | SignalP-TM   |
| gj_188520957_gb_ACD58902.1 | 0.151 | 25 | 0.111 | 11 | 0.153 | 4  | 0.128 | 0.117 | N | 0.51 | SignalP-TM   |
| gj_188520958_gb_ACD58903.1 | 0.112 | 38 | 0.114 | 52 | 0.167 | 49 | 0.086 | 0.104 | N | 0.51 | SignalP-TM   |
| gj_188520959_gb_ACD58904.1 | 0.157 | 23 | 0.257 | 23 | 0.717 | 8  | 0.509 | 0.35  | N | 0.51 | SignalP-TM   |
| gj_188520960_gb_ACD58905.1 | 0.117 | 64 | 0.129 | 19 | 0.191 | 6  | 0.161 | 0.141 | N | 0.51 | SignalP-TM   |
| gj_188520962_gb_ACD58907.1 | 0.133 | 20 | 0.156 | 11 | 0.297 | 2  | 0.235 | 0.193 | N | 0.57 | SignalP-noTM |
| gj_188520963_gb_ACD58908.1 | 0.143 | 20 | 0.17  | 20 | 0.253 | 12 | 0.204 | 0.186 | N | 0.57 | SignalP-noTM |
| gj_188520964_gb_ACD58909.1 | 0.241 | 45 | 0.216 | 45 | 0.474 | 43 | 0.146 | 0.183 | N | 0.57 | SignalP-noTM |
| gj_188520965_gb_ACD58910.1 | 0.123 | 16 | 0.115 | 43 | 0.145 | 52 | 0.088 | 0.102 | N | 0.57 | SignalP-noTM |
| gj_188520966_gb_ACD58911.1 | 0.24  | 37 | 0.196 | 37 | 0.264 | 2  | 0.127 | 0.17  | N | 0.51 | SignalP-TM   |
| gj_188520969_gb_ACD58914.1 | 0.114 | 67 | 0.106 | 43 | 0.137 | 10 | 0.101 | 0.104 | N | 0.57 | SignalP-noTM |
| gj_188520970_gb_ACD58915.1 | 0.147 | 40 | 0.139 | 40 | 0.171 | 26 | 0.11  | 0.125 | N | 0.57 | SignalP-noTM |
| gj_188520971_gb_ACD58916.1 | 0.119 | 19 | 0.139 | 19 | 0.2   | 48 | 0.151 | 0.145 | N | 0.57 | SignalP-noTM |
| gj_188520984_gb_ACD58929.1 | 0.115 | 61 | 0.182 | 12 | 0.485 | 1  | 0.286 | 0.221 | N | 0.51 | SignalP-TM   |
| gj_188520985_gb_ACD58930.1 | 0.348 | 34 | 0.237 | 34 | 0.231 | 33 | 0.154 | 0.198 | N | 0.57 | SignalP-noTM |
| gj_188520986_gb_ACD58931.1 | 0.106 | 22 | 0.12  | 29 | 0.165 | 19 | 0.115 | 0.117 | N | 0.57 | SignalP-noTM |
| gj_188520987_gb_ACD58932.1 | 0.109 | 39 | 0.111 | 16 | 0.159 | 8  | 0.114 | 0.113 | N | 0.57 | SignalP-noTM |
| gj_188520988_gb_ACD58933.1 | 0.788 | 35 | 0.796 | 35 | 0.862 | 26 | 0.726 | 0.77  | Y | 0.51 | SignalP-TM   |
| gj_188520989_gb_ACD58934.1 | 0.132 | 14 | 0.154 | 14 | 0.281 | 12 | 0.185 | 0.169 | N | 0.57 | SignalP-noTM |
| gj_188520990_gb_ACD58935.1 | 0.107 | 18 | 0.104 | 50 | 0.144 | 2  | 0.094 | 0.099 | N | 0.57 | SignalP-noTM |
| gj_188520994_gb_ACD58939.1 | 0.111 | 50 | 0.13  | 50 | 0.2   | 48 | 0.125 | 0.128 | N | 0.57 | SignalP-noTM |
| gj_188520995_gb_ACD58940.1 | 0.147 | 63 | 0.168 | 11 | 0.443 | 1  | 0.256 | 0.21  | N | 0.57 | SignalP-noTM |
| gj_188520996_gb_ACD58941.1 | 0.115 | 26 | 0.107 | 48 | 0.13  | 36 | 0.09  | 0.099 | N | 0.57 | SignalP-noTM |
| gj_188520998_gb_ACD58943.1 | 0.104 | 26 | 0.106 | 11 | 0.138 | 5  | 0.116 | 0.109 | N | 0.51 | SignalP-TM   |
| gj_188521001_gb_ACD58946.1 | 0.169 | 49 | 0.143 | 49 | 0.195 | 12 | 0.13  | 0.137 | N | 0.57 | SignalP-noTM |
| gj_528897479_gb_ACD58948.2 | 0.116 | 66 | 0.12  | 58 | 0.201 | 1  | 0.109 | 0.115 | N | 0.57 | SignalP-noTM |
| gj_188521004_gb_ACD58949.1 | 0.29  | 32 | 0.144 | 32 | 0.246 | 14 | 0.131 | 0.14  | N | 0.51 | SignalP-TM   |
| gj_188521018_gb_ACD58963.1 | 0.128 | 56 | 0.146 | 56 | 0.204 | 46 | 0.139 | 0.143 | N | 0.57 | SignalP-noTM |
| gj_188521023_gb_ACD58968.1 | 0.155 | 35 | 0.159 | 35 | 0.326 | 2  | 0.177 | 0.168 | N | 0.57 | SignalP-noTM |
| gj_188521026_gb_ACD58971.1 | 0.103 | 29 | 0.147 | 18 | 0.31  | 17 | 0.213 | 0.178 | N | 0.57 | SignalP-noTM |
| gj_188521032_gb_ACD58977.1 | 0.18  | 46 | 0.143 | 11 | 0.278 | 2  | 0.201 | 0.17  | N | 0.57 | SignalP-noTM |
| gj_188521033_gb_ACD58978.1 | 0.14  | 45 | 0.147 | 11 | 0.325 | 2  | 0.213 | 0.178 | N | 0.57 | SignalP-noTM |
| gj_188521034_gb_ACD58979.1 | 0.136 | 45 | 0.17  | 11 | 0.429 | 1  | 0.276 | 0.209 | N | 0.51 | SignalP-TM   |
| gj_188521035_gb_ACD58980.1 | 0.138 | 54 | 0.182 | 11 | 0.442 | 3  | 0.32  | 0.247 | N | 0.57 | SignalP-noTM |
| gj_188521036_gb_ACD58981.1 | 0.316 | 20 | 0.252 | 20 | 0.354 | 1  | 0.219 | 0.236 | N | 0.57 | SignalP-noTM |
| gj_188521037_gb_ACD58982.1 | 0.182 | 47 | 0.16  | 47 | 0.213 | 37 | 0.116 | 0.139 | N | 0.57 | SignalP-noTM |
| gj_188521038_gb_ACD58983.1 | 0.196 | 24 | 0.198 | 24 | 0.419 | 3  | 0.243 | 0.215 | N | 0.51 | SignalP-TM   |
| gj_188521039_gb_ACD58984.1 | 0.165 | 37 | 0.137 | 37 | 0.156 | 20 | 0.114 | 0.126 | N | 0.57 | SignalP-noTM |
| gj_188521040_gb_ACD58985.1 | 0.214 | 39 | 0.22  | 21 | 0.381 | 20 | 0.257 | 0.237 | N | 0.57 | SignalP-noTM |
| gj_188521044_gb_ACD58989.1 | 0.147 | 65 | 0.134 | 65 | 0.222 | 64 | 0.082 | 0.115 | N | 0.51 | SignalP-TM   |

|          |          |          |          |                            |
|----------|----------|----------|----------|----------------------------|
| 0.749885 | 0.987029 | 0.769058 | 0.835324 | gj_188520888_gb_ACD58833.1 |
| 0.095868 | 0.006587 | 0.118784 | 0.073746 | gj_188520889_gb_ACD58834.1 |
| 0.170654 | 0.061226 | 0.212822 | 0.148234 | gj_188520892_gb_ACD58837.1 |
| 0.78262  | 0.111155 | 0.781597 | 0.558457 | gj_188520893_gb_ACD58838.1 |
| 0.323442 | 0.958194 | 0.41314  | 0.564925 | gj_188520894_gb_ACD58839.1 |
| 0.148932 | 0.029455 | 0.181087 | 0.119825 | gj_188520895_gb_ACD58840.1 |
| 0.218915 | 0.103123 | 0.079365 | 0.133801 | gj_188520896_gb_ACD58841.1 |
| 0.104799 | 0.074261 | 0.182873 | 0.120644 | gj_188520898_gb_ACD58843.1 |
| 0.465555 | 0.930733 | 0.650446 | 0.682245 | gj_188520902_gb_ACD58847.1 |
| 0.097704 | 0.005378 | 0.166866 | 0.089983 | gj_188520904_gb_ACD58849.1 |
| 0.126198 | 0.232009 | 0.10736  | 0.155189 | gj_188520908_gb_ACD58853.1 |
| 0.35503  | 0.302167 | 0.392933 | 0.350043 | gj_188520909_gb_ACD58854.1 |
| 0.158691 | 0.084092 | 0.161515 | 0.134766 | gj_188520912_gb_ACD58857.1 |
| 0.070045 | 0.053454 | 0.138955 | 0.087485 | gj_188520914_gb_ACD58859.1 |
| 0.197182 | 0.070633 | 0.212822 | 0.160212 | gj_188520915_gb_ACD58860.1 |
| 0.092038 | 0.039241 | 0.136815 | 0.089365 | gj_188520916_gb_ACD58861.1 |
| 0.186032 | 0.030325 | 0.237398 | 0.151252 | gj_188520917_gb_ACD58862.1 |
| 0.193879 | 0.06985  | 0.240124 | 0.167951 | gj_188520918_gb_ACD58863.1 |
| 0.127527 | 0.101197 | 0.135755 | 0.121493 | gj_188520919_gb_ACD58864.1 |
| 0.1034   | 0.362622 | 0.193411 | 0.219811 | gj_188520920_gb_ACD58865.1 |
| 0.15046  | 0.867381 | 0.100652 | 0.372831 | gj_188520921_gb_ACD58866.1 |
| 0.140035 | 0.105647 | 0.129544 | 0.125075 | gj_188520922_gb_ACD58867.1 |
| 0.23041  | 0.818021 | 0.427759 | 0.492063 | gj_188520923_gb_ACD58868.1 |
| 0.21738  | 0.874462 | 0.118784 | 0.403542 | gj_188520926_gb_ACD58871.1 |
| 0.174509 | 0.890319 | 0.087864 | 0.384231 | gj_188520929_gb_ACD58874.1 |
| 0.218403 | 0.106786 | 0.273289 | 0.199493 | gj_188520930_gb_ACD58875.1 |
| 0.073237 | 0.057541 | 0.088346 | 0.073041 | gj_188520940_gb_ACD58885.1 |
| 0.642217 | 0.990969 | 0.56193  | 0.731705 | gj_188520942_gb_ACD58887.1 |
| 0.141851 | 0.409508 | 0.250678 | 0.267346 | gj_188520943_gb_ACD58888.1 |
| 0.107936 | 0.057704 | 0.162737 | 0.109459 | gj_188520944_gb_ACD58889.1 |
| 0.126198 | 0.035881 | 0.164792 | 0.108957 | gj_188520945_gb_ACD58890.1 |
| 0.240124 | 0.473774 | 0.287205 | 0.333701 | gj_188520946_gb_ACD5       |

|                             |       |    |       |    |       |    |       |       |   |      |              |
|-----------------------------|-------|----|-------|----|-------|----|-------|-------|---|------|--------------|
| gj_188521047_gb_ACD589921_1 | 0.133 | 47 | 0.11  | 47 | 0.104 | 46 | 0.07  | 0.091 | N | 0.57 | SignalP-noTM |
| gj_188521048_gb_ACD589931_1 | 0.19  | 46 | 0.275 | 22 | 0.494 | 24 | 0.403 | 0.322 | N | 0.51 | SignalP-TM   |
| gj_188521049_gb_ACD589941_1 | 0.132 | 45 | 0.157 | 27 | 0.334 | 26 | 0.193 | 0.174 | N | 0.57 | SignalP-noTM |
| gj_188521053_gb_ACD589981_1 | 0.114 | 55 | 0.11  | 34 | 0.141 | 24 | 0.096 | 0.104 | N | 0.57 | SignalP-noTM |
| gj_188521059_gb_ACD590041_1 | 0.137 | 23 | 0.175 | 11 | 0.367 | 1  | 0.295 | 0.231 | N | 0.57 | SignalP-noTM |
| gj_188521063_gb_ACD590081_1 | 0.149 | 51 | 0.134 | 51 | 0.161 | 44 | 0.098 | 0.117 | N | 0.57 | SignalP-noTM |
| gj_188521064_gb_ACD590091_1 | 0.215 | 18 | 0.369 | 18 | 0.707 | 14 | 0.631 | 0.466 | N | 0.51 | SignalP-TM   |
| gj_188521068_gb_ACD590131_1 | 0.136 | 16 | 0.171 | 11 | 0.442 | 1  | 0.279 | 0.211 | N | 0.51 | SignalP-TM   |
| gj_188521070_gb_ACD590151_1 | 0.117 | 50 | 0.118 | 50 | 0.163 | 41 | 0.094 | 0.107 | N | 0.57 | SignalP-noTM |
| gj_188521071_gb_ACD590161_1 | 0.113 | 23 | 0.114 | 11 | 0.185 | 2  | 0.123 | 0.118 | N | 0.57 | SignalP-noTM |
| gj_188521073_gb_ACD590181_1 | 0.131 | 30 | 0.168 | 11 | 0.394 | 2  | 0.284 | 0.211 | N | 0.51 | SignalP-TM   |
| gj_188521076_gb_ACD590211_1 | 0.133 | 26 | 0.102 | 56 | 0.128 | 47 | 0.074 | 0.092 | N | 0.51 | SignalP-TM   |
| gj_188521077_gb_ACD590221_1 | 0.134 | 28 | 0.248 | 22 | 0.66  | 19 | 0.517 | 0.374 | N | 0.57 | SignalP-noTM |
| gj_188521081_gb_ACD590261_1 | 0.113 | 39 | 0.121 | 45 | 0.153 | 44 | 0.108 | 0.115 | N | 0.57 | SignalP-noTM |
| gj_188521082_gb_ACD590271_1 | 0.112 | 42 | 0.125 | 11 | 0.206 | 5  | 0.169 | 0.141 | N | 0.51 | SignalP-TM   |
| gj_188521094_gb_ACD590391_1 | 0.116 | 38 | 0.138 | 18 | 0.293 | 10 | 0.177 | 0.157 | N | 0.57 | SignalP-noTM |
| gj_188521095_gb_ACD590401_1 | 0.646 | 27 | 0.749 | 27 | 0.955 | 12 | 0.895 | 0.817 | Y | 0.57 | SignalP-noTM |
| gj_188521096_gb_ACD590411_1 | 0.146 | 36 | 0.186 | 20 | 0.424 | 10 | 0.285 | 0.232 | N | 0.57 | SignalP-noTM |
| gj_188521097_gb_ACD590421_1 | 0.104 | 42 | 0.137 | 23 | 0.221 | 14 | 0.167 | 0.151 | N | 0.57 | SignalP-noTM |
| gj_188521098_gb_ACD590431_1 | 0.124 | 42 | 0.113 | 50 | 0.146 | 38 | 0.088 | 0.102 | N | 0.57 | SignalP-noTM |
| gj_188521099_gb_ACD590441_1 | 0.182 | 39 | 0.122 | 39 | 0.275 | 1  | 0.101 | 0.112 | N | 0.57 | SignalP-noTM |
| gj_188521100_gb_ACD590451_1 | 0.314 | 70 | 0.174 | 70 | 0.244 | 20 | 0.119 | 0.148 | N | 0.57 | SignalP-noTM |
| gj_188521101_gb_ACD590461_1 | 0.146 | 43 | 0.158 | 43 | 0.254 | 41 | 0.118 | 0.139 | N | 0.57 | SignalP-noTM |
| gj_188521112_gb_ACD590571_1 | 0.108 | 34 | 0.1   | 65 | 0.103 | 55 | 0.084 | 0.092 | N | 0.57 | SignalP-noTM |
| gj_188521113_gb_ACD590581_1 | 0.204 | 25 | 0.275 | 25 | 0.594 | 22 | 0.287 | 0.28  | N | 0.57 | SignalP-noTM |
| gj_188521114_gb_ACD590591_1 | 0.104 | 38 | 0.115 | 11 | 0.206 | 1  | 0.123 | 0.119 | N | 0.57 | SignalP-noTM |
| gj_188521116_gb_ACD590611_1 | 0.453 | 38 | 0.459 | 38 | 0.765 | 35 | 0.243 | 0.379 | N | 0.51 | SignalP-TM   |
| gj_188521117_gb_ACD590621_1 | 0.156 | 42 | 0.146 | 42 | 0.219 | 19 | 0.143 | 0.145 | N | 0.57 | SignalP-noTM |
| gj_188521120_gb_ACD590651_1 | 0.117 | 14 | 0.162 | 14 | 0.405 | 2  | 0.235 | 0.197 | N | 0.57 | SignalP-noTM |
| gj_188521121_gb_ACD590661_1 | 0.137 | 61 | 0.111 | 12 | 0.166 | 1  | 0.117 | 0.113 | N | 0.51 | SignalP-TM   |
| gj_188521122_gb_ACD590671_1 | 0.156 | 44 | 0.186 | 46 | 0.391 | 42 | 0.174 | 0.181 | N | 0.51 | SignalP-TM   |
| gj_188521123_gb_ACD590681_1 | 0.104 | 25 | 0.103 | 11 | 0.159 | 2  | 0.105 | 0.104 | N | 0.51 | SignalP-TM   |
| gj_188521124_gb_ACD590691_1 | 0.215 | 30 | 0.256 | 30 | 0.462 | 1  | 0.354 | 0.292 | N | 0.51 | SignalP-TM   |
| gj_188521125_gb_ACD590701_1 | 0.302 | 29 | 0.205 | 29 | 0.252 | 1  | 0.165 | 0.19  | N | 0.51 | SignalP-TM   |
| gj_188521126_gb_ACD590711_1 | 0.442 | 18 | 0.408 | 18 | 0.46  | 13 | 0.342 | 0.384 | N | 0.51 | SignalP-TM   |
| gj_188521127_gb_ACD590721_1 | 0.336 | 18 | 0.385 | 18 | 0.557 | 17 | 0.398 | 0.39  | N | 0.51 | SignalP-TM   |
| gj_188521128_gb_ACD590731_1 | 0.15  | 28 | 0.124 | 28 | 0.204 | 1  | 0.094 | 0.113 | N | 0.51 | SignalP-TM   |
| gj_188521133_gb_ACD590781_1 | 0.116 | 28 | 0.158 | 11 | 0.333 | 2  | 0.255 | 0.204 | N | 0.57 | SignalP-noTM |
| gj_188521135_gb_ACD590801_1 | 0.145 | 61 | 0.117 | 61 | 0.138 | 58 | 0.09  | 0.107 | N | 0.51 | SignalP-TM   |
| gj_188521136_gb_ACD590811_1 | 0.14  | 55 | 0.13  | 11 | 0.223 | 2  | 0.174 | 0.147 | N | 0.51 | SignalP-TM   |
| gj_188521137_gb_ACD590821_1 | 0.164 | 16 | 0.169 | 16 | 0.227 | 13 | 0.17  | 0.169 | N | 0.57 | SignalP-noTM |
| gj_188521138_gb_ACD590831_1 | 0.109 | 57 | 0.104 | 69 | 0.114 | 68 | 0.089 | 0.097 | N | 0.57 | SignalP-noTM |
| gj_188521139_gb_ACD590841_1 | 0.147 | 38 | 0.138 | 38 | 0.172 | 31 | 0.112 | 0.126 | N | 0.57 | SignalP-noTM |
| gj_188521140_gb_ACD590851_1 | 0.488 | 36 | 0.642 | 36 | 0.952 | 26 | 0.803 | 0.718 | Y | 0.57 | SignalP-noTM |
| gj_188521144_gb_ACD590891_1 | 0.11  | 27 | 0.163 | 14 | 0.318 | 7  | 0.268 | 0.213 | N | 0.57 | SignalP-noTM |
| gj_188521146_gb_ACD590911_1 | 0.102 | 21 | 0.138 | 11 | 0.308 | 1  | 0.178 | 0.157 | N | 0.57 | SignalP-noTM |
| gj_188521147_gb_ACD590921_1 | 0.109 | 59 | 0.102 | 59 | 0.127 | 4  | 0.082 | 0.092 | N | 0.57 | SignalP-noTM |
| gj_188521149_gb_ACD590941_1 | 0.156 | 42 | 0.146 | 42 | 0.219 | 19 | 0.143 | 0.145 | N | 0.57 | SignalP-noTM |
| gj_188521157_gb_ACD591021_1 | 0.137 | 56 | 0.144 | 56 | 0.175 | 52 | 0.129 | 0.137 | N | 0.57 | SignalP-noTM |
| gj_188521158_gb_ACD591031_1 | 0.411 | 21 | 0.358 | 21 | 0.512 | 16 | 0.275 | 0.319 | N | 0.57 | SignalP-noTM |
| gj_188521159_gb_ACD591041_1 | 0.117 | 42 | 0.113 | 42 | 0.127 | 12 | 0.099 | 0.106 | N | 0.57 | SignalP-noTM |
| gj_188521161_gb_ACD591061_1 | 0.109 | 36 | 0.138 | 12 | 0.278 | 3  | 0.191 | 0.163 | N | 0.57 | SignalP-noTM |
| gj_188521170_gb_ACD591151_1 | 0.181 | 28 | 0.126 | 28 | 0.154 | 2  | 0.1   | 0.114 | N | 0.57 | SignalP-noTM |
| gj_188521171_gb_ACD591161_1 | 0.213 | 30 | 0.367 | 24 | 0.893 | 19 | 0.684 | 0.516 | N | 0.57 | SignalP-noTM |
| gj_188521172_gb_ACD591171_1 | 0.136 | 47 | 0.124 | 11 | 0.211 | 1  | 0.152 | 0.137 | N | 0.57 | SignalP-noTM |
| gj_188521173_gb_ACD591181_1 | 0.3   | 36 | 0.192 | 36 | 0.29  | 18 | 0.147 | 0.175 | N | 0.51 | SignalP-TM   |
| gj_188521174_gb_ACD591191_1 | 0.116 | 25 | 0.096 | 40 | 0.096 | 29 | 0.076 | 0.086 | N | 0.57 | SignalP-noTM |
| gj_188521175_gb_ACD591201_1 | 0.148 | 29 | 0.127 | 29 | 0.158 | 27 | 0.106 | 0.119 | N | 0.51 | SignalP-TM   |
| gj_188521176_gb_ACD591211_1 | 0.169 | 25 | 0.115 | 25 | 0.123 | 29 | 0.077 | 0.097 | N | 0.57 | SignalP-noTM |
| gj_188521179_gb_ACD591241_1 | 0.126 | 37 | 0.101 | 64 | 0.119 | 3  | 0.085 | 0.093 | N | 0.57 | SignalP-noTM |
| gj_188521183_gb_ACD591281_1 | 0.338 | 31 | 0.355 | 31 | 0.668 | 24 | 0.418 | 0.385 | N | 0.57 | SignalP-noTM |
| gj_188521184_gb_ACD591291_1 | 0.15  | 49 | 0.146 | 21 | 0.251 | 17 | 0.18  | 0.162 | N | 0.57 | SignalP-noTM |
| gj_188521187_gb_ACD591321_1 | 0.298 | 39 | 0.298 | 39 | 0.617 | 16 | 0.388 | 0.34  | N | 0.57 | SignalP-noTM |
| gj_188521188_gb_ACD591331_1 | 0.101 | 37 | 0.111 | 23 | 0.144 | 19 | 0.098 | 0.105 | N | 0.57 | SignalP-noTM |
| gj_188521191_gb_ACD591361_1 | 0.109 | 28 | 0.117 | 11 | 0.195 | 2  | 0.135 | 0.125 | N | 0.57 | SignalP-noTM |
| gj_188521192_gb_ACD591371_1 | 0.201 | 20 | 0.161 | 20 | 0.186 | 19 | 0.129 | 0.146 | N | 0.57 | SignalP-noTM |
| gj_188521193_gb_ACD591381_1 | 0.146 | 45 | 0.126 | 30 | 0.226 | 1  | 0.124 | 0.125 | N | 0.57 | SignalP-noTM |
| gj_188521194_gb_ACD591391_1 | 0.258 | 33 | 0.266 | 18 | 0.501 | 17 | 0.349 | 0.297 | N | 0.51 | SignalP-TM   |
| gj_188521195_gb_ACD591401_1 | 0.215 | 35 | 0.153 | 35 | 0.215 | 34 | 0.116 | 0.135 | N | 0.57 | SignalP-noTM |
| gj_188521196_gb_ACD591411_1 | 0.192 | 31 | 0.153 | 31 | 0.175 | 30 | 0.124 | 0.139 | N | 0.57 | SignalP-noTM |
| gj_188521198_gb_ACD591431_1 | 0.142 | 20 | 0.202 | 20 | 0.338 | 14 | 0.25  | 0.22  | N | 0.51 | SignalP-TM   |
| gj_188521199_gb_ACD591441_1 | 0.123 | 27 | 0.113 | 27 | 0.181 | 15 | 0.106 | 0.11  | N | 0.57 | SignalP-noTM |
| gj_188521204_gb_ACD591491_1 | 0.118 | 36 | 0.169 | 20 | 0.366 | 13 | 0.246 | 0.205 | N | 0.57 | SignalP-noTM |
| gj_188521205_gb_ACD591501_1 | 0.183 | 26 | 0.145 | 26 | 0.26  | 2  | 0.129 | 0.137 | N | 0.57 | SignalP-noTM |
| gj_188521206_gb_ACD591511_1 | 0.403 | 32 | 0.3   | 32 | 0.327 | 27 | 0.213 | 0.259 | N | 0.57 | SignalP-noTM |
| gj_188521207_gb_ACD591521_1 | 0.116 | 43 | 0.118 | 11 | 0.233 | 1  | 0.129 | 0.123 | N | 0.57 | SignalP-noTM |
| gj_188521208_gb_ACD591531_1 | 0.182 | 26 | 0.232 | 16 | 0.557 | 11 | 0.369 | 0.296 | N | 0.57 | SignalP-noTM |
| gj_188521209_gb_ACD591541_1 | 0.114 | 25 | 0.115 | 11 | 0.187 | 3  | 0.132 | 0.123 | N | 0.57 | SignalP-noTM |

|          |          |          |          |                             |
|----------|----------|----------|----------|-----------------------------|
| 0.604918 | 0.971055 | 0.654527 | 0.7435   | gj_188521047_gb_ACD589921_1 |
| 0.102845 | 0.066422 | 0.147041 | 0.105436 | gj_188521048_gb_ACD589931_1 |
| 0.120681 | 0.032515 | 0.159494 | 0.10423  | gj_188521049_gb_ACD589941_1 |
| 0.13193  | 0.150077 | 0.122282 | 0.134763 | gj_188521053_gb_ACD589981_1 |
| 0.099571 | 0.001607 | 0.150844 | 0.084007 | gj_188521059_gb_ACD590041_1 |
| 0.074675 | 0.006262 | 0.103679 | 0.061539 | gj_188521063_gb_ACD590081_1 |
| 0.108515 | 0.03214  | 0.150844 | 0.097166 | gj_188521064_gb_ACD590091_1 |
| 0.091289 | 0.120999 | 0.161515 | 0.124601 | gj_188521068_gb_ACD590131_1 |
| 0.094063 | 0.064224 | 0.103958 | 0.087415 | gj_188521070_gb_ACD590151_1 |
| 0.094063 | 0.050354 | 0.187856 | 0.110758 | gj_188521071_gb_ACD590161_1 |
| 0.103123 | 0.086907 | 0.201009 | 0.130346 | gj_188521073_gb_ACD590181_1 |
| 0.125868 | 0.249553 | 0.24122  | 0.205547 | gj_188521076_gb_ACD590211_1 |
| 0.120363 | 0.054372 | 0.155513 | 0.110083 | gj_188521077_gb_ACD590221_1 |
| 0.110289 | 0.259802 | 0.224088 | 0.198053 | gj_188521081_gb_ACD590261_1 |
| 0.228289 | 0.655205 | 0.219943 | 0.367812 | gj_188521082_gb_ACD590271_1 |
| 0.394365 | 0.114457 | 0.539666 | 0.349496 | gj_188521094_gb_ACD590391_1 |
| 0.904651 | 0.923438 | 0.816678 | 0.881589 | gj_188521095_gb_ACD590401_1 |
| 0.168866 | 0.975779 | 0.283534 | 0.475393 | gj_188521096_gb_ACD590411_1 |
| 0.129297 | 0.968507 | 0.135755 | 0.409063 | gj_188521097_gb_ACD590421_1 |
| 0.087624 | 0.0298   | 0.117533 | 0.078319 | gj_188521098_gb_ACD590431_1 |
| 0.071625 | 0.038791 | 0.102569 | 0.070995 | gj_188521099_gb_ACD590441_1 |
| 0.169806 | 0.144056 | 0.173647 | 0.162503 | gj_188521100_gb_ACD590451_1 |
| 0.129544 | 0.047426 | 0.137881 | 0.10495  | gj_188521101_gb_ACD590461_1 |
| 0.059189 | 0.033086 | 0.107936 | 0.066737 | gj_188521112_gb_ACD590571_1 |
| 0.731452 | 0.100381 | 0.705993 | 0.512609 | gj_188521113_gb_ACD590581_1 |
| 0.956727 | 0.999835 | 0.850306 | 0.935623 | gj_188521114_gb_ACD590591_1 |
| 0.78313  | 0.735557 | 0.698465 | 0.739051 | gj_188521116_gb_ACD590611_1 |
| 0.268548 | 0.550824 | 0.313674 | 0.377682 | gj_188521117_gb_ACD590621_1 |
| 0.082944 | 0.04121  | 0.115373 | 0.079842 | gj_188521120_gb_ACD590651_1 |
| 0.094833 | 0.274482 | 0.253506 | 0.207607 | gj_188521121_gb_ACD590661_1 |
| 0.114452 | 0.083173 | 0.173217 | 0.122614 | gj_188521122_gb_ACD590671_1 |
| 0.309171 | 0.045045 | 0.234693 | 0.196303 | gj_188                      |

|                            |       |    |       |    |       |    |       |       |   |      |              |
|----------------------------|-------|----|-------|----|-------|----|-------|-------|---|------|--------------|
| gi_188521210_gb_ACD59155.1 | 0.144 | 28 | 0.142 | 28 | 0.192 | 27 | 0.146 | 0.144 | N | 0.57 | SignalP-noTM |
| gi_188521211_gb_ACD59156.1 | 0.225 | 33 | 0.21  | 33 | 0.406 | 6  | 0.274 | 0.24  | N | 0.57 | SignalP-noTM |
| gi_188521212_gb_ACD59157.1 | 0.369 | 27 | 0.519 | 27 | 0.925 | 7  | 0.815 | 0.658 | Y | 0.57 | SignalP-noTM |
| gi_188521213_gb_ACD59158.1 | 0.132 | 44 | 0.115 | 44 | 0.133 | 42 | 0.085 | 0.101 | N | 0.57 | SignalP-noTM |
| gi_188521214_gb_ACD59159.1 | 0.132 | 26 | 0.24  | 20 | 0.607 | 14 | 0.506 | 0.365 | N | 0.57 | SignalP-noTM |
| gi_188521215_gb_ACD59160.1 | 0.113 | 23 | 0.157 | 11 | 0.421 | 3  | 0.248 | 0.2   | N | 0.57 | SignalP-noTM |
| gi_188521216_gb_ACD59161.1 | 0.185 | 43 | 0.18  | 11 | 0.4   | 5  | 0.335 | 0.253 | N | 0.57 | SignalP-noTM |
| gi_188521217_gb_ACD59162.1 | 0.117 | 32 | 0.156 | 12 | 0.311 | 8  | 0.231 | 0.191 | N | 0.57 | SignalP-noTM |
| gi_188521218_gb_ACD59163.1 | 0.17  | 47 | 0.145 | 47 | 0.29  | 2  | 0.15  | 0.148 | N | 0.57 | SignalP-noTM |
| gi_188521219_gb_ACD59164.1 | 0.112 | 17 | 0.099 | 65 | 0.109 | 70 | 0.078 | 0.089 | N | 0.57 | SignalP-noTM |
| gi_188521220_gb_ACD59165.1 | 0.176 | 42 | 0.121 | 42 | 0.183 | 10 | 0.091 | 0.107 | N | 0.57 | SignalP-noTM |
| gi_188521221_gb_ACD59166.1 | 0.145 | 25 | 0.144 | 25 | 0.245 | 3  | 0.165 | 0.154 | N | 0.57 | SignalP-noTM |
| gi_188521222_gb_ACD59167.1 | 0.104 | 22 | 0.12  | 12 | 0.171 | 1  | 0.145 | 0.131 | N | 0.57 | SignalP-noTM |
| gi_188521223_gb_ACD59168.1 | 0.173 | 19 | 0.137 | 19 | 0.157 | 35 | 0.099 | 0.119 | N | 0.57 | SignalP-noTM |
| gi_188521224_gb_ACD59169.1 | 0.128 | 17 | 0.115 | 34 | 0.138 | 33 | 0.101 | 0.108 | N | 0.57 | SignalP-noTM |
| gi_188521225_gb_ACD59170.1 | 0.109 | 62 | 0.103 | 38 | 0.132 | 2  | 0.094 | 0.1   | N | 0.51 | SignalP-TM   |
| gi_188521226_gb_ACD59171.1 | 0.143 | 39 | 0.114 | 57 | 0.122 | 51 | 0.095 | 0.105 | N | 0.57 | SignalP-noTM |
| gi_188521227_gb_ACD59172.1 | 0.105 | 25 | 0.153 | 11 | 0.34  | 1  | 0.224 | 0.186 | N | 0.57 | SignalP-noTM |
| gi_188521228_gb_ACD59173.1 | 0.122 | 66 | 0.128 | 41 | 0.194 | 30 | 0.122 | 0.125 | N | 0.57 | SignalP-noTM |
| gi_188521229_gb_ACD59174.1 | 0.115 | 24 | 0.167 | 11 | 0.391 | 4  | 0.288 | 0.224 | N | 0.57 | SignalP-noTM |
| gi_188521230_gb_ACD59175.1 | 0.103 | 46 | 0.101 | 61 | 0.113 | 51 | 0.086 | 0.094 | N | 0.57 | SignalP-noTM |
| gi_188521231_gb_ACD59176.1 | 0.141 | 61 | 0.151 | 19 | 0.33  | 8  | 0.206 | 0.177 | N | 0.57 | SignalP-noTM |
| gi_188521232_gb_ACD59177.1 | 0.115 | 26 | 0.109 | 22 | 0.159 | 18 | 0.108 | 0.109 | N | 0.57 | SignalP-noTM |
| gi_188521233_gb_ACD59178.1 | 0.197 | 65 | 0.131 | 65 | 0.122 | 1  | 0.073 | 0.104 | N | 0.57 | SignalP-noTM |
| gi_188521234_gb_ACD59179.1 | 0.113 | 36 | 0.114 | 11 | 0.172 | 1  | 0.127 | 0.12  | N | 0.57 | SignalP-noTM |
| gi_188521235_gb_ACD59180.1 | 0.115 | 20 | 0.127 | 20 | 0.171 | 11 | 0.129 | 0.128 | N | 0.57 | SignalP-noTM |
| gi_188521236_gb_ACD59181.1 | 0.124 | 43 | 0.141 | 43 | 0.213 | 44 | 0.126 | 0.136 | N | 0.51 | SignalP-TM   |
| gi_188521237_gb_ACD59182.1 | 0.26  | 27 | 0.26  | 27 | 0.415 | 22 | 0.222 | 0.242 | N | 0.57 | SignalP-noTM |
| gi_188521238_gb_ACD59183.1 | 0.117 | 24 | 0.105 | 24 | 0.195 | 1  | 0.096 | 0.101 | N | 0.57 | SignalP-noTM |
| gi_188521239_gb_ACD59184.1 | 0.121 | 22 | 0.121 | 13 | 0.201 | 9  | 0.145 | 0.132 | N | 0.57 | SignalP-noTM |
| gi_188521240_gb_ACD59185.1 | 0.105 | 69 | 0.105 | 51 | 0.119 | 41 | 0.097 | 0.101 | N | 0.57 | SignalP-noTM |
| gi_188521241_gb_ACD59186.1 | 0.194 | 9  | 0.196 | 11 | 0.61  | 1  | 0.356 | 0.271 | N | 0.57 | SignalP-noTM |
| gi_188521242_gb_ACD59187.1 | 0.135 | 41 | 0.149 | 47 | 0.326 | 40 | 0.14  | 0.146 | N | 0.51 | SignalP-TM   |
| gi_188521243_gb_ACD59188.1 | 0.121 | 27 | 0.107 | 58 | 0.127 | 54 | 0.087 | 0.097 | N | 0.57 | SignalP-noTM |
| gi_188521244_gb_ACD59189.1 | 0.128 | 26 | 0.107 | 50 | 0.131 | 46 | 0.078 | 0.093 | N | 0.57 | SignalP-noTM |
| gi_188521245_gb_ACD59190.1 | 0.245 | 24 | 0.273 | 24 | 0.609 | 10 | 0.403 | 0.321 | N | 0.51 | SignalP-TM   |
| gi_188521246_gb_ACD59191.1 | 0.583 | 28 | 0.761 | 28 | 0.999 | 24 | 0.938 | 0.844 | Y | 0.57 | SignalP-noTM |
| gi_188521248_gb_ACD59193.1 | 0.42  | 41 | 0.23  | 41 | 0.247 | 40 | 0.087 | 0.177 | N | 0.51 | SignalP-TM   |
| gi_188521249_gb_ACD59194.1 | 0.111 | 24 | 0.14  | 28 | 0.312 | 23 | 0.16  | 0.147 | N | 0.51 | SignalP-TM   |
| gi_188521250_gb_ACD59195.1 | 0.267 | 40 | 0.218 | 40 | 0.363 | 1  | 0.208 | 0.214 | N | 0.51 | SignalP-TM   |
| gi_188521252_gb_ACD59197.1 | 0.261 | 33 | 0.328 | 33 | 0.615 | 28 | 0.395 | 0.353 | N | 0.51 | SignalP-TM   |
| gi_188521253_gb_ACD59198.1 | 0.233 | 40 | 0.175 | 40 | 0.297 | 1  | 0.155 | 0.167 | N | 0.51 | SignalP-TM   |
| gi_188521254_gb_ACD59199.1 | 0.184 | 52 | 0.144 | 52 | 0.135 | 48 | 0.099 | 0.128 | N | 0.51 | SignalP-TM   |
| gi_188521255_gb_ACD59200.1 | 0.168 | 27 | 0.22  | 27 | 0.46  | 9  | 0.359 | 0.272 | N | 0.51 | SignalP-TM   |
| gi_188521256_gb_ACD59201.1 | 0.107 | 8  | 0.114 | 36 | 0.151 | 12 | 0.122 | 0.118 | N | 0.57 | SignalP-noTM |
| gi_188521257_gb_ACD59202.1 | 0.113 | 26 | 0.106 | 26 | 0.121 | 8  | 0.104 | 0.105 | N | 0.57 | SignalP-noTM |
| gi_188521258_gb_ACD59203.1 | 0.118 | 18 | 0.146 | 11 | 0.294 | 3  | 0.209 | 0.176 | N | 0.57 | SignalP-noTM |
| gi_188521259_gb_ACD59204.1 | 0.121 | 18 | 0.118 | 26 | 0.181 | 1  | 0.125 | 0.121 | N | 0.57 | SignalP-noTM |
| gi_188521260_gb_ACD59205.1 | 0.374 | 36 | 0.228 | 36 | 0.275 | 11 | 0.174 | 0.203 | N | 0.57 | SignalP-noTM |
| gi_188521261_gb_ACD59206.1 | 0.127 | 57 | 0.108 | 57 | 0.105 | 55 | 0.082 | 0.096 | N | 0.57 | SignalP-noTM |
| gi_188521262_gb_ACD59207.1 | 0.153 | 69 | 0.115 | 69 | 0.119 | 32 | 0.078 | 0.097 | N | 0.57 | SignalP-noTM |
| gi_188521263_gb_ACD59208.1 | 0.111 | 27 | 0.119 | 11 | 0.191 | 5  | 0.153 | 0.132 | N | 0.51 | SignalP-TM   |
| gi_188521265_gb_ACD59210.1 | 0.11  | 57 | 0.168 | 34 | 0.444 | 25 | 0.228 | 0.196 | N | 0.57 | SignalP-noTM |
| gi_188521267_gb_ACD59212.1 | 0.134 | 22 | 0.162 | 22 | 0.318 | 11 | 0.201 | 0.18  | N | 0.57 | SignalP-noTM |
| gi_188521273_gb_ACD59218.1 | 0.127 | 29 | 0.118 | 29 | 0.126 | 26 | 0.093 | 0.106 | N | 0.57 | SignalP-noTM |
| gi_528897480_gb_ACD59223.2 | 0.116 | 66 | 0.112 | 58 | 0.201 | 1  | 0.109 | 0.115 | N | 0.57 | SignalP-noTM |
| gi_528897481_gb_ACD59227.2 | 0.116 | 66 | 0.118 | 59 | 0.197 | 1  | 0.108 | 0.113 | N | 0.57 | SignalP-noTM |
| gi_188521285_gb_ACD59230.1 | 0.198 | 23 | 0.173 | 23 | 0.281 | 1  | 0.175 | 0.174 | N | 0.57 | SignalP-noTM |
| gi_188521290_gb_ACD59235.1 | 0.189 | 30 | 0.128 | 30 | 0.189 | 4  | 0.126 | 0.127 | N | 0.51 | SignalP-TM   |
| gi_188521291_gb_ACD59236.1 | 0.22  | 42 | 0.187 | 42 | 0.357 | 31 | 0.106 | 0.157 | N | 0.51 | SignalP-TM   |
| gi_188521446_gb_ACD59391.1 | 0.123 | 9  | 0.138 | 11 | 0.261 | 6  | 0.199 | 0.166 | N | 0.57 | SignalP-noTM |
| gi_188521485_gb_ACD59430.1 | 0.103 | 20 | 0.102 | 62 | 0.131 | 1  | 0.095 | 0.099 | N | 0.57 | SignalP-noTM |
| gi_188521486_gb_ACD59431.1 | 0.167 | 35 | 0.167 | 35 | 0.329 | 34 | 0.17  | 0.169 | N | 0.57 | SignalP-noTM |
| gi_188521488_gb_ACD59433.1 | 0.158 | 24 | 0.161 | 24 | 0.241 | 21 | 0.172 | 0.166 | N | 0.57 | SignalP-noTM |
| gi_188521494_gb_ACD59439.1 | 0.585 | 60 | 0.321 | 60 | 0.296 | 59 | 0.133 | 0.233 | N | 0.57 | SignalP-noTM |
| gi_188521495_gb_ACD59440.1 | 0.135 | 37 | 0.119 | 11 | 0.186 | 3  | 0.142 | 0.13  | N | 0.57 | SignalP-noTM |
| gi_188521497_gb_ACD59442.1 | 0.124 | 33 | 0.126 | 42 | 0.203 | 32 | 0.123 | 0.125 | N | 0.57 | SignalP-noTM |
| gi_188521499_gb_ACD59444.1 | 0.118 | 65 | 0.181 | 11 | 0.43  | 3  | 0.33  | 0.251 | N | 0.57 | SignalP-noTM |
| gi_188521500_gb_ACD59445.1 | 0.155 | 42 | 0.145 | 42 | 0.21  | 19 | 0.138 | 0.141 | N | 0.57 | SignalP-noTM |
| gi_188521504_gb_ACD59449.1 | 0.411 | 21 | 0.358 | 21 | 0.512 | 16 | 0.275 | 0.319 | N | 0.57 | SignalP-noTM |
| gi_188521511_gb_ACD59456.1 | 0.116 | 43 | 0.112 | 33 | 0.153 | 25 | 0.108 | 0.11  | N | 0.57 | SignalP-noTM |
| gi_188521512_gb_ACD59457.1 | 0.116 | 26 | 0.125 | 48 | 0.209 | 44 | 0.122 | 0.124 | N | 0.57 | SignalP-noTM |
| gi_188521513_gb_ACD59458.1 | 0.111 | 25 | 0.158 | 11 | 0.304 | 1  | 0.247 | 0.2   | N | 0.57 | SignalP-noTM |
| gi_188521524_gb_ACD59469.1 | 0.161 | 20 | 0.116 | 33 | 0.165 | 32 | 0.084 | 0.101 | N | 0.57 | SignalP-noTM |
| gi_188521525_gb_ACD59470.1 | 0.11  | 47 | 0.118 | 13 | 0.158 | 2  | 0.139 | 0.128 | N | 0.57 | SignalP-noTM |
| gi_188521526_gb_ACD59471.1 | 0.139 | 33 | 0.121 | 11 | 0.247 | 1  | 0.13  | 0.124 | N | 0.51 | SignalP-TM   |
| gi_188521527_gb_ACD59472.1 | 0.298 | 21 | 0.536 | 21 | 0.988 | 10 | 0.959 | 0.735 | Y | 0.57 | SignalP-noTM |
| gi_188521528_gb_ACD59473.1 | 0.151 | 27 | 0.221 | 16 | 0.594 | 8  | 0.408 | 0.309 | N | 0.57 | SignalP-noTM |

|          |          |          |          |                            |
|----------|----------|----------|----------|----------------------------|
| 0.953381 | 0.999908 | 0.908711 | 0.954    | gi_188521210_gb_ACD59155.1 |
| 0.958672 | 0.974544 | 0.899619 | 0.944278 | gi_188521211_gb_ACD59156.1 |
| 0.842507 | 0.827213 | 0.791666 | 0.820462 | gi_188521212_gb_ACD59157.1 |
| 0.963066 | 0.999861 | 0.933764 | 0.965564 | gi_188521213_gb_ACD59158.1 |
| 0.959728 | 0.999976 | 0.931119 | 0.963608 | gi_188521214_gb_ACD59159.1 |
| 0.956102 | 0.99981  | 0.928375 | 0.961429 | gi_188521215_gb_ACD59160.1 |
| 0.962529 | 0.99996  | 0.938601 | 0.96703  | gi_188521216_gb_ACD59161.1 |
| 0.954955 | 0.999972 | 0.924282 | 0.959736 | gi_188521217_gb_ACD59162.1 |
| 0.1065   | 0.000998 | 0.187856 | 0.098451 | gi_188521218_gb_ACD59163.1 |
| 0.252939 | 0.058856 | 0.276278 | 0.196024 | gi_188521219_gb_ACD59164.1 |
| 0.089562 | 0.025014 | 0.127527 | 0.080701 | gi_188521220_gb_ACD59165.1 |
| 0.117845 | 0.075718 | 0.116603 | 0.103389 | gi_188521221_gb_ACD59166.1 |
| 0.126198 | 0.054837 | 0.131587 | 0.104207 | gi_188521222_gb_ACD59167.1 |
| 0.057704 | 0.046353 | 0.087864 | 0.063974 | gi_188521223_gb_ACD59168.1 |
| 0.094833 | 0.08883  | 0.08883  | 0.090831 | gi_188521224_gb_ACD59169.1 |
| 0.065866 | 0.124881 | 0.091788 | 0.094178 | gi_188521225_gb_ACD59170.1 |
| 0.182873 | 0.001518 | 0.135404 | 0.106598 | gi_188521226_gb_ACD59171.1 |
| 0.065866 | 0.04229  | 0.111452 | 0.073203 | gi_188521227_gb_ACD59172.1 |
| 0.080891 | 0.010446 | 0.124227 | 0.071788 | gi_188521228_gb_ACD59173.1 |
| 0.135404 | 0.019096 | 0.1603   | 0.104933 | gi_188521229_gb_ACD59174.1 |
| 0.078276 | 0.534445 | 0.076562 | 0.229761 | gi_188521230_gb_ACD59175.1 |
| 0.063151 | 0.032233 | 0.087624 | 0.061003 | gi_188521231_gb_ACD59176.1 |
| 0.054064 | 0.105931 | 0.065681 | 0.075525 | gi_188521232_gb_ACD59177.1 |
| 0.059189 | 0.032421 | 0.103123 | 0.064911 | gi_188521233_gb_ACD59178.1 |
| 0.093553 | 0.051077 | 0.110859 | 0.085163 | gi_188521234_gb_ACD59179.1 |
| 0.952438 | 0.978959 | 0.943906 | 0.958434 | gi_188521235_gb_ACD59180.1 |
| 0.929955 | 0.829346 | 0.897431 | 0.885577 | gi_188521236_gb_ACD59181.1 |
| 0.104799 | 0.016529 | 0.103123 | 0.074817 | gi_188521237_gb_ACD59182.1 |
| 0.079805 | 0.030325 | 0.102569 | 0.0709   | gi_188521238_gb_ACD59183.1 |
| 0.127882 | 0.563407 | 0.092289 | 0.261186 | gi_188521239_gb_ACD59184.1 |
| 0.24453  | 0.028443 | 0.197658 | 0.156877 | gi_188521240_gb_ACD59185.1 |
| 0.877073 | 0.915444 | 0.899348 | 0.897288 | gi_188521241_gb_ACD59186.1 |
| 0.886452 | 0.999392 | 0.869438 | 0.918427 | gi_188521242_gb_ACD59187.1 |
| 0.06192  | 0.050211 | 0.       |          |                            |

|                            |       |    |       |    |       |    |       |       |   |      |              |
|----------------------------|-------|----|-------|----|-------|----|-------|-------|---|------|--------------|
| gi_188521530_gb_ACD59475.1 | 0.248 | 41 | 0.199 | 41 | 0.28  | 37 | 0.137 | 0.17  | N | 0.57 | SignalP-noTM |
| gi_188521532_gb_ACD59477.1 | 0.128 | 27 | 0.207 | 27 | 0.443 | 15 | 0.307 | 0.254 | N | 0.57 | SignalP-noTM |
| gi_188521534_gb_ACD59479.1 | 0.197 | 26 | 0.19  | 26 | 0.369 | 22 | 0.212 | 0.2   | N | 0.57 | SignalP-noTM |
| gi_188521540_gb_ACD59485.1 | 0.135 | 23 | 0.139 | 55 | 0.297 | 48 | 0.104 | 0.123 | N | 0.57 | SignalP-noTM |
| gi_188521541_gb_ACD59486.1 | 0.241 | 19 | 0.282 | 19 | 0.484 | 18 | 0.317 | 0.299 | N | 0.57 | SignalP-noTM |
| gi_188521542_gb_ACD59487.1 | 0.101 | 32 | 0.13  | 18 | 0.214 | 17 | 0.158 | 0.143 | N | 0.57 | SignalP-noTM |
| gi_188521544_gb_ACD59489.1 | 0.113 | 23 | 0.276 | 17 | 0.853 | 14 | 0.738 | 0.493 | N | 0.57 | SignalP-noTM |
| gi_188521545_gb_ACD59490.1 | 0.134 | 49 | 0.124 | 49 | 0.168 | 34 | 0.117 | 0.121 | N | 0.57 | SignalP-noTM |
| gi_188521546_gb_ACD59491.1 | 0.141 | 36 | 0.154 | 36 | 0.257 | 15 | 0.169 | 0.161 | N | 0.57 | SignalP-noTM |
| gi_188521547_gb_ACD59492.1 | 0.117 | 23 | 0.103 | 33 | 0.144 | 1  | 0.093 | 0.099 | N | 0.57 | SignalP-noTM |
| gi_188521548_gb_ACD59493.1 | 0.111 | 21 | 0.106 | 21 | 0.134 | 2  | 0.103 | 0.105 | N | 0.57 | SignalP-noTM |
| gi_188521549_gb_ACD59494.1 | 0.17  | 20 | 0.138 | 20 | 0.18  | 32 | 0.107 | 0.123 | N | 0.57 | SignalP-noTM |
| gi_188521550_gb_ACD59495.1 | 0.221 | 56 | 0.204 | 56 | 0.32  | 51 | 0.164 | 0.185 | N | 0.57 | SignalP-noTM |
| gi_188521551_gb_ACD59496.1 | 0.179 | 49 | 0.207 | 11 | 0.58  | 5  | 0.441 | 0.317 | N | 0.57 | SignalP-noTM |
| gi_188521552_gb_ACD59497.1 | 0.13  | 52 | 0.178 | 46 | 0.447 | 43 | 0.201 | 0.187 | N | 0.51 | SignalP-TM   |
| gi_188521553_gb_ACD59498.1 | 0.157 | 24 | 0.14  | 24 | 0.153 | 1  | 0.123 | 0.132 | N | 0.57 | SignalP-noTM |
| gi_188521555_gb_ACD59500.1 | 0.106 | 34 | 0.126 | 14 | 0.233 | 6  | 0.156 | 0.14  | N | 0.57 | SignalP-noTM |
| gi_188521556_gb_ACD59501.1 | 0.114 | 22 | 0.144 | 13 | 0.262 | 9  | 0.209 | 0.175 | N | 0.57 | SignalP-noTM |
| gi_188521563_gb_ACD59508.1 | 0.132 | 51 | 0.115 | 51 | 0.155 | 1  | 0.106 | 0.111 | N | 0.57 | SignalP-noTM |
| gi_188521565_gb_ACD59510.1 | 0.146 | 23 | 0.215 | 11 | 0.709 | 1  | 0.447 | 0.301 | N | 0.51 | SignalP-TM   |
| gi_188521568_gb_ACD59513.1 | 0.102 | 26 | 0.123 | 12 | 0.195 | 3  | 0.153 | 0.137 | N | 0.57 | SignalP-noTM |
| gi_188521571_gb_ACD59516.1 | 0.138 | 18 | 0.246 | 18 | 0.573 | 10 | 0.428 | 0.332 | N | 0.57 | SignalP-noTM |
| gi_188521572_gb_ACD59517.1 | 0.156 | 36 | 0.121 | 11 | 0.222 | 1  | 0.135 | 0.127 | N | 0.57 | SignalP-noTM |
| gi_188521573_gb_ACD59518.1 | 0.161 | 35 | 0.138 | 35 | 0.147 | 7  | 0.112 | 0.126 | N | 0.57 | SignalP-noTM |
| gi_188521574_gb_ACD59519.1 | 0.169 | 51 | 0.11  | 51 | 0.124 | 1  | 0.085 | 0.101 | N | 0.51 | SignalP-TM   |
| gi_188521580_gb_ACD59525.1 | 0.197 | 26 | 0.191 | 26 | 0.363 | 22 | 0.215 | 0.202 | N | 0.57 | SignalP-noTM |
| gi_188521581_gb_ACD59526.1 | 0.117 | 34 | 0.283 | 12 | 0.882 | 4  | 0.825 | 0.538 | N | 0.57 | SignalP-noTM |
| gi_188521583_gb_ACD59528.1 | 0.102 | 30 | 0.096 | 16 | 0.118 | 7  | 0.088 | 0.092 | N | 0.57 | SignalP-noTM |
| gi_188521584_gb_ACD59529.1 | 0.109 | 48 | 0.161 | 11 | 0.376 | 3  | 0.28  | 0.217 | N | 0.57 | SignalP-noTM |
| gi_188521592_gb_ACD59537.1 | 0.142 | 42 | 0.119 | 42 | 0.143 | 1  | 0.101 | 0.11  | N | 0.57 | SignalP-noTM |
| gi_188521593_gb_ACD59538.1 | 0.105 | 66 | 0.106 | 43 | 0.14  | 41 | 0.093 | 0.1   | N | 0.57 | SignalP-noTM |
| gi_188521595_gb_ACD59540.1 | 0.149 | 36 | 0.179 | 11 | 0.481 | 2  | 0.32  | 0.231 | N | 0.51 | SignalP-TM   |
| gi_188521597_gb_ACD59542.1 | 0.861 | 20 | 0.861 | 20 | 0.927 | 19 | 0.828 | 0.845 | Y | 0.57 | SignalP-noTM |
| gi_188521598_gb_ACD59543.1 | 0.152 | 15 | 0.212 | 15 | 0.429 | 3  | 0.3   | 0.253 | N | 0.57 | SignalP-noTM |
| gi_188521599_gb_ACD59544.1 | 0.129 | 20 | 0.163 | 15 | 0.406 | 5  | 0.22  | 0.19  | N | 0.57 | SignalP-noTM |
| gi_188521608_gb_ACD59553.1 | 0.246 | 28 | 0.331 | 28 | 0.804 | 24 | 0.388 | 0.358 | N | 0.57 | SignalP-noTM |
| gi_188521609_gb_ACD59554.1 | 0.702 | 17 | 0.586 | 17 | 0.651 | 15 | 0.46  | 0.527 | N | 0.57 | SignalP-noTM |
| gi_188521610_gb_ACD59555.1 | 0.199 | 20 | 0.346 | 20 | 0.804 | 13 | 0.602 | 0.466 | N | 0.57 | SignalP-noTM |
| gi_188521611_gb_ACD59556.1 | 0.832 | 29 | 0.792 | 29 | 0.958 | 14 | 0.86  | 0.824 | Y | 0.57 | SignalP-noTM |
| gi_188521612_gb_ACD59557.1 | 0.119 | 37 | 0.132 | 11 | 0.283 | 4  | 0.183 | 0.156 | N | 0.57 | SignalP-noTM |
| gi_188521613_gb_ACD59558.1 | 0.771 | 29 | 0.822 | 29 | 0.977 | 18 | 0.903 | 0.86  | Y | 0.57 | SignalP-noTM |
| gi_188521614_gb_ACD59559.1 | 0.121 | 24 | 0.111 | 36 | 0.144 | 34 | 0.1   | 0.106 | N | 0.57 | SignalP-noTM |
| gi_188521615_gb_ACD59560.1 | 0.139 | 49 | 0.103 | 31 | 0.129 | 11 | 0.094 | 0.099 | N | 0.57 | SignalP-noTM |
| gi_188521616_gb_ACD59561.1 | 0.157 | 33 | 0.122 | 33 | 0.172 | 39 | 0.089 | 0.106 | N | 0.57 | SignalP-noTM |
| gi_188521617_gb_ACD59562.1 | 0.203 | 20 | 0.158 | 20 | 0.307 | 2  | 0.15  | 0.154 | N | 0.57 | SignalP-noTM |
| gi_188521618_gb_ACD59563.1 | 0.125 | 38 | 0.133 | 14 | 0.22  | 5  | 0.181 | 0.155 | N | 0.57 | SignalP-noTM |
| gi_188521619_gb_ACD59564.1 | 0.128 | 53 | 0.178 | 15 | 0.38  | 14 | 0.323 | 0.246 | N | 0.57 | SignalP-noTM |
| gi_188521620_gb_ACD59565.1 | 0.275 | 25 | 0.212 | 25 | 0.327 | 10 | 0.201 | 0.208 | N | 0.51 | SignalP-TM   |
| gi_188521621_gb_ACD59566.1 | 0.276 | 23 | 0.25  | 23 | 0.474 | 3  | 0.268 | 0.258 | N | 0.57 | SignalP-noTM |
| gi_188521622_gb_ACD59567.1 | 0.114 | 33 | 0.108 | 33 | 0.136 | 31 | 0.094 | 0.103 | N | 0.51 | SignalP-TM   |
| gi_188521623_gb_ACD59568.1 | 0.805 | 27 | 0.879 | 27 | 0.99  | 15 | 0.956 | 0.915 | Y | 0.57 | SignalP-noTM |
| gi_188521625_gb_ACD59570.1 | 0.157 | 34 | 0.183 | 11 | 0.539 | 1  | 0.305 | 0.24  | N | 0.57 | SignalP-noTM |
| gi_188521626_gb_ACD59571.1 | 0.105 | 18 | 0.105 | 39 | 0.119 | 8  | 0.093 | 0.099 | N | 0.57 | SignalP-noTM |
| gi_188521627_gb_ACD59572.1 | 0.18  | 22 | 0.133 | 22 | 0.164 | 1  | 0.106 | 0.12  | N | 0.57 | SignalP-noTM |
| gi_188521628_gb_ACD59573.1 | 0.133 | 27 | 0.107 | 27 | 0.108 | 55 | 0.08  | 0.094 | N | 0.57 | SignalP-noTM |
| gi_188521629_gb_ACD59574.1 | 0.152 | 21 | 0.116 | 21 | 0.131 | 20 | 0.088 | 0.103 | N | 0.57 | SignalP-noTM |
| gi_188521630_gb_ACD59575.1 | 0.149 | 55 | 0.125 | 32 | 0.239 | 1  | 0.113 | 0.119 | N | 0.57 | SignalP-noTM |
| gi_188521631_gb_ACD59576.1 | 0.103 | 33 | 0.103 | 40 | 0.112 | 38 | 0.086 | 0.095 | N | 0.57 | SignalP-noTM |
| gi_188521633_gb_ACD59578.1 | 0.562 | 38 | 0.7   | 38 | 0.923 | 29 | 0.819 | 0.756 | Y | 0.57 | SignalP-noTM |
| gi_188521634_gb_ACD59579.1 | 0.221 | 37 | 0.182 | 37 | 0.201 | 2  | 0.138 | 0.161 | N | 0.57 | SignalP-noTM |
| gi_188521635_gb_ACD59580.1 | 0.117 | 38 | 0.18  | 38 | 0.275 | 34 | 0.142 | 0.166 | N | 0.51 | SignalP-TM   |
| gi_188521636_gb_ACD59581.1 | 0.313 | 51 | 0.238 | 51 | 0.25  | 45 | 0.131 | 0.199 | N | 0.51 | SignalP-TM   |
| gi_188521637_gb_ACD59582.1 | 0.111 | 26 | 0.142 | 16 | 0.295 | 25 | 0.197 | 0.168 | N | 0.57 | SignalP-noTM |
| gi_188521638_gb_ACD59583.1 | 0.115 | 53 | 0.119 | 13 | 0.16  | 7  | 0.143 | 0.131 | N | 0.57 | SignalP-noTM |
| gi_188521640_gb_ACD59585.1 | 0.112 | 27 | 0.141 | 34 | 0.362 | 29 | 0.135 | 0.139 | N | 0.57 | SignalP-noTM |
| gi_188521641_gb_ACD59586.1 | 0.18  | 35 | 0.156 | 35 | 0.277 | 16 | 0.185 | 0.169 | N | 0.57 | SignalP-noTM |
| gi_188521642_gb_ACD59587.1 | 0.25  | 24 | 0.238 | 19 | 0.473 | 8  | 0.256 | 0.246 | N | 0.57 | SignalP-noTM |
| gi_188521643_gb_ACD59588.1 | 0.128 | 29 | 0.122 | 29 | 0.165 | 50 | 0.097 | 0.11  | N | 0.57 | SignalP-noTM |
| gi_188521644_gb_ACD59589.1 | 0.15  | 38 | 0.116 | 38 | 0.149 | 37 | 0.092 | 0.105 | N | 0.57 | SignalP-noTM |
| gi_188521646_gb_ACD59591.1 | 0.108 | 58 | 0.104 | 24 | 0.129 | 1  | 0.098 | 0.101 | N | 0.57 | SignalP-noTM |
| gi_188521647_gb_ACD59592.1 | 0.124 | 33 | 0.127 | 42 | 0.205 | 32 | 0.124 | 0.126 | N | 0.57 | SignalP-noTM |
| gi_188521648_gb_ACD59593.1 | 0.105 | 20 | 0.15  | 16 | 0.28  | 6  | 0.228 | 0.187 | N | 0.57 | SignalP-noTM |
| gi_188521652_gb_ACD59597.1 | 0.13  | 30 | 0.182 | 20 | 0.379 | 1  | 0.307 | 0.228 | N | 0.51 | SignalP-TM   |
| gi_188521653_gb_ACD59598.1 | 0.549 | 30 | 0.353 | 30 | 0.386 | 12 | 0.232 | 0.308 | N | 0.51 | SignalP-TM   |
| gi_188521655_gb_ACD59600.1 | 0.171 | 20 | 0.162 | 55 | 0.416 | 49 | 0.153 | 0.158 | N | 0.57 | SignalP-noTM |
| gi_188521659_gb_ACD59604.1 | 0.14  | 26 | 0.105 | 26 | 0.109 | 45 | 0.079 | 0.093 | N | 0.57 | SignalP-noTM |
| gi_188521660_gb_ACD59605.1 | 0.798 | 24 | 0.877 | 24 | 0.984 | 13 | 0.964 | 0.918 | Y | 0.57 | SignalP-noTM |
| gi_188521661_gb_ACD59606.1 | 0.241 | 30 | 0.187 | 30 | 0.448 | 1  | 0.233 | 0.209 | N | 0.57 | SignalP-noTM |

|          |          |          |          |                            |
|----------|----------|----------|----------|----------------------------|
| 0.220974 | 0.079585 | 0.371684 | 0.224081 | gi_188521530_gb_ACD59475.1 |
| 0.916369 | 0.511998 | 0.879001 | 0.769123 | gi_188521532_gb_ACD59477.1 |
| 0.143687 | 0.020796 | 0.176681 | 0.113721 | gi_188521534_gb_ACD59479.1 |
| 0.092038 | 0.008359 | 0.142217 | 0.080871 | gi_188521540_gb_ACD59485.1 |
| 0.962421 | 0.999846 | 0.865646 | 0.942638 | gi_188521541_gb_ACD59486.1 |
| 0.873139 | 0.995517 | 0.567829 | 0.812162 | gi_188521542_gb_ACD59487.1 |
| 0.334701 | 0.867726 | 0.207839 | 0.470089 | gi_188521544_gb_ACD59489.1 |
| 0.115679 | 0.024364 | 0.169384 | 0.103142 | gi_188521545_gb_ACD59490.1 |
| 0.187399 | 0.375897 | 0.17023  | 0.244509 | gi_188521546_gb_ACD59491.1 |
| 0.090052 | 0.008689 | 0.137525 | 0.078755 | gi_188521547_gb_ACD59492.1 |
| 0.85483  | 0.963806 | 0.806589 | 0.875075 | gi_188521548_gb_ACD59493.1 |
| 0.067736 | 0.009359 | 0.109975 | 0.062357 | gi_188521549_gb_ACD59494.1 |
| 0.084324 | 0.074468 | 0.115679 | 0.091949 | gi_188521550_gb_ACD59495.1 |
| 0.129544 | 0.004185 | 0.138596 | 0.090775 | gi_188521551_gb_ACD59496.1 |
| 0.153944 | 0.112047 | 0.174942 | 0.146978 | gi_188521552_gb_ACD59497.1 |
| 0.138596 | 0.565619 | 0.093553 | 0.265923 | gi_188521553_gb_ACD59498.1 |
| 0.227761 | 0.937027 | 0.121639 | 0.428809 | gi_188521555_gb_ACD59500.1 |
| 0.733802 | 0.836443 | 0.821127 | 0.797124 | gi_188521556_gb_ACD59501.1 |
| 0.11847  | 0.065314 | 0.159022 | 0.114292 | gi_188521563_gb_ACD59508.1 |
| 0.948191 | 0.979508 | 0.896321 | 0.94134  | gi_188521565_gb_ACD59510.1 |
| 0.169384 | 0.412413 | 0.144427 | 0.242075 | gi_188521568_gb_ACD59513.1 |
| 0.938255 | 0.983761 | 0.851448 | 0.924488 | gi_188521571_gb_ACD59516.1 |
| 0.111155 | 0.003395 | 0.146665 | 0.087072 | gi_188521572_gb_ACD59517.1 |
| 0.257501 | 0.045957 | 0.359854 | 0.221104 | gi_188521573_gb_ACD59518.1 |
| 0.137881 | 0.008114 | 0.190618 | 0.112204 | gi_188521574_gb_ACD59519.1 |
| 0.607067 | 0.825058 | 0.72968  | 0.720602 | gi_188521580_gb_ACD59525.1 |
| 0.247871 | 0.472278 | 0.226181 | 0.315443 | gi_188521581_gb_ACD59526.1 |
| 0.317562 | 0.554532 | 0.455121 | 0.442405 | gi_188521583_gb_ACD59528.1 |
| 0.141486 | 0.892928 | 0.098767 | 0.377727 | gi_188521584_gb_ACD59529.1 |
| 0.214333 | 0.062797 | 0.266784 | 0.181305 | gi_188521592_gb_ACD59537.1 |
| 0.116912 | 0.036615 | 0.147418 | 0.100315 | gi_188521593_gb_ACD59538.1 |
| 0.528469 | 0.283534 | 0.597005 | 0.469669 | gi_188521595_gb_ACD        |



|                            |       |    |       |    |       |    |       |       |   |      |              |
|----------------------------|-------|----|-------|----|-------|----|-------|-------|---|------|--------------|
| gj_188521662.gb_ACD59607.1 | 0.142 | 53 | 0.161 | 53 | 0.31  | 37 | 0.15  | 0.156 | N | 0.57 | SignalP-noTM |
| gj_188521663.gb_ACD59608.1 | 0.118 | 39 | 0.108 | 39 | 0.144 | 2  | 0.091 | 0.1   | N | 0.57 | SignalP-noTM |
| gj_188521666.gb_ACD59611.1 | 0.1   | 33 | 0.107 | 68 | 0.121 | 57 | 0.087 | 0.098 | N | 0.57 | SignalP-noTM |
| gj_188521667.gb_ACD59612.1 | 0.289 | 31 | 0.373 | 31 | 0.784 | 12 | 0.515 | 0.426 | N | 0.51 | SignalP-TM   |
| gj_188521668.gb_ACD59613.1 | 0.445 | 53 | 0.255 | 53 | 0.278 | 49 | 0.095 | 0.18  | N | 0.57 | SignalP-noTM |
| gj_188521669.gb_ACD59614.1 | 0.141 | 18 | 0.108 | 18 | 0.114 | 62 | 0.081 | 0.095 | N | 0.57 | SignalP-noTM |
| gj_188521670.gb_ACD59615.1 | 0.118 | 55 | 0.105 | 27 | 0.126 | 16 | 0.084 | 0.097 | N | 0.51 | SignalP-TM   |
| gj_188521671.gb_ACD59616.1 | 0.141 | 27 | 0.144 | 27 | 0.231 | 14 | 0.157 | 0.15  | N | 0.57 | SignalP-noTM |
| gj_188521672.gb_ACD59617.1 | 0.117 | 46 | 0.189 | 26 | 0.487 | 25 | 0.27  | 0.227 | N | 0.57 | SignalP-noTM |
| gj_188521673.gb_ACD59618.1 | 0.128 | 11 | 0.108 | 11 | 0.134 | 18 | 0.091 | 0.1   | N | 0.57 | SignalP-noTM |
| gj_188521674.gb_ACD59619.1 | 0.502 | 25 | 0.398 | 25 | 0.462 | 12 | 0.346 | 0.379 | N | 0.51 | SignalP-TM   |
| gj_188521675.gb_ACD59620.1 | 0.162 | 45 | 0.142 | 31 | 0.186 | 30 | 0.118 | 0.133 | N | 0.51 | SignalP-TM   |
| gj_188521676.gb_ACD59621.1 | 0.114 | 41 | 0.116 | 11 | 0.182 | 4  | 0.135 | 0.125 | N | 0.57 | SignalP-noTM |
| gj_188521680.gb_ACD59625.1 | 0.167 | 37 | 0.238 | 37 | 0.53  | 34 | 0.179 | 0.216 | N | 0.51 | SignalP-TM   |
| gj_188521687.gb_ACD59632.1 | 0.147 | 45 | 0.182 | 16 | 0.41  | 10 | 0.305 | 0.24  | N | 0.57 | SignalP-noTM |
| gj_188521688.gb_ACD59633.1 | 0.2   | 15 | 0.34  | 15 | 0.686 | 1  | 0.592 | 0.433 | N | 0.51 | SignalP-TM   |
| gj_188521690.gb_ACD59635.1 | 0.135 | 28 | 0.228 | 20 | 0.543 | 9  | 0.375 | 0.283 | N | 0.51 | SignalP-TM   |
| gj_188521691.gb_ACD59636.1 | 0.121 | 24 | 0.16  | 11 | 0.424 | 1  | 0.245 | 0.2   | N | 0.57 | SignalP-noTM |
| gj_188521692.gb_ACD59637.1 | 0.411 | 21 | 0.358 | 21 | 0.512 | 16 | 0.275 | 0.319 | N | 0.57 | SignalP-noTM |
| gj_188521693.gb_ACD59638.1 | 0.122 | 49 | 0.114 | 25 | 0.148 | 23 | 0.096 | 0.105 | N | 0.57 | SignalP-noTM |
| gj_188521802.gb_ACD59747.1 | 0.105 | 43 | 0.113 | 11 | 0.18  | 1  | 0.123 | 0.117 | N | 0.57 | SignalP-noTM |
| gj_188521803.gb_ACD59748.1 | 0.125 | 36 | 0.107 | 36 | 0.168 | 2  | 0.092 | 0.1   | N | 0.57 | SignalP-noTM |
| gj_188521805.gb_ACD59750.1 | 0.148 | 63 | 0.12  | 63 | 0.133 | 26 | 0.098 | 0.11  | N | 0.57 | SignalP-noTM |
| gj_188521806.gb_ACD59751.1 | 0.247 | 12 | 0.343 | 12 | 0.656 | 11 | 0.485 | 0.41  | N | 0.57 | SignalP-noTM |
| gj_188521807.gb_ACD59752.1 | 0.281 | 14 | 0.49  | 14 | 0.903 | 5  | 0.848 | 0.658 | Y | 0.57 | SignalP-noTM |
| gj_188521808.gb_ACD59753.1 | 0.113 | 40 | 0.105 | 40 | 0.115 | 18 | 0.09  | 0.098 | N | 0.57 | SignalP-noTM |
| gj_188521809.gb_ACD59754.1 | 0.188 | 19 | 0.139 | 19 | 0.238 | 34 | 0.091 | 0.116 | N | 0.57 | SignalP-noTM |
| gj_188521810.gb_ACD59755.1 | 0.425 | 25 | 0.634 | 25 | 0.989 | 10 | 0.939 | 0.777 | Y | 0.57 | SignalP-noTM |
| gj_188521814.gb_ACD59759.1 | 0.105 | 32 | 0.125 | 11 | 0.218 | 1  | 0.149 | 0.136 | N | 0.57 | SignalP-noTM |
| gj_188521820.gb_ACD59765.1 | 0.794 | 29 | 0.838 | 29 | 0.956 | 19 | 0.814 | 0.827 | Y | 0.57 | SignalP-noTM |
| gj_528897485.gb_AGS47851.1 | 0.308 | 29 | 0.332 | 29 | 0.489 | 8  | 0.387 | 0.352 | N | 0.51 | SignalP-TM   |
| gj_188521821.gb_ACD59766.1 | 0.726 | 24 | 0.823 | 24 | 0.976 | 20 | 0.943 | 0.879 | Y | 0.57 | SignalP-noTM |
| gj_188521823.gb_ACD59768.1 | 0.306 | 24 | 0.162 | 24 | 0.134 | 43 | 0.091 | 0.128 | N | 0.57 | SignalP-noTM |
| gj_188521825.gb_ACD59770.1 | 0.426 | 36 | 0.22  | 36 | 0.263 | 5  | 0.125 | 0.176 | N | 0.57 | SignalP-noTM |
| gj_188521826.gb_ACD59771.1 | 0.133 | 29 | 0.16  | 11 | 0.345 | 4  | 0.262 | 0.208 | N | 0.57 | SignalP-noTM |
| gj_188521830.gb_ACD59775.1 | 0.133 | 28 | 0.128 | 17 | 0.188 | 5  | 0.136 | 0.132 | N | 0.57 | SignalP-noTM |
| gj_188521831.gb_ACD59776.1 | 0.164 | 29 | 0.148 | 19 | 0.334 | 14 | 0.196 | 0.171 | N | 0.57 | SignalP-noTM |
| gj_188521832.gb_ACD59777.1 | 0.193 | 22 | 0.121 | 22 | 0.113 | 29 | 0.073 | 0.098 | N | 0.57 | SignalP-noTM |
| gj_188521833.gb_ACD59778.1 | 0.1   | 29 | 0.162 | 11 | 0.309 | 6  | 0.273 | 0.214 | N | 0.57 | SignalP-noTM |
| gj_188521834.gb_ACD59779.1 | 0.115 | 22 | 0.145 | 13 | 0.276 | 9  | 0.212 | 0.177 | N | 0.57 | SignalP-noTM |
| gj_188521839.gb_ACD59784.1 | 0.111 | 23 | 0.177 | 11 | 0.466 | 2  | 0.287 | 0.229 | N | 0.57 | SignalP-noTM |
| gj_188521844.gb_ACD59789.1 | 0.153 | 19 | 0.14  | 19 | 0.156 | 18 | 0.131 | 0.136 | N | 0.57 | SignalP-noTM |
| gj_188521845.gb_ACD59790.1 | 0.196 | 39 | 0.15  | 39 | 0.156 | 8  | 0.105 | 0.133 | N | 0.51 | SignalP-TM   |
| gj_188521851.gb_ACD59796.1 | 0.125 | 25 | 0.2   | 52 | 0.472 | 43 | 0.298 | 0.246 | N | 0.57 | SignalP-noTM |
| gj_188521854.gb_ACD59799.1 | 0.119 | 52 | 0.107 | 52 | 0.156 | 3  | 0.088 | 0.098 | N | 0.57 | SignalP-noTM |
| gj_188521855.gb_ACD59800.1 | 0.136 | 45 | 0.098 | 45 | 0.1   | 68 | 0.064 | 0.082 | N | 0.57 | SignalP-noTM |
| gj_188521856.gb_ACD59801.1 | 0.106 | 57 | 0.103 | 11 | 0.148 | 1  | 0.1   | 0.102 | N | 0.57 | SignalP-noTM |
| gj_188521857.gb_ACD59802.1 | 0.328 | 24 | 0.295 | 24 | 0.432 | 31 | 0.26  | 0.278 | N | 0.57 | SignalP-noTM |
| gj_188521858.gb_ACD59803.1 | 0.815 | 28 | 0.859 | 28 | 0.975 | 16 | 0.925 | 0.89  | Y | 0.57 | SignalP-noTM |
| gj_188521859.gb_ACD59804.1 | 0.479 | 22 | 0.672 | 22 | 0.976 | 14 | 0.943 | 0.799 | Y | 0.57 | SignalP-noTM |
| gj_188521860.gb_ACD59805.1 | 0.119 | 19 | 0.14  | 11 | 0.265 | 1  | 0.195 | 0.166 | N | 0.57 | SignalP-noTM |
| gj_188521861.gb_ACD59806.1 | 0.144 | 25 | 0.19  | 13 | 0.421 | 5  | 0.348 | 0.264 | N | 0.57 | SignalP-noTM |
| gj_188521863.gb_ACD59808.1 | 0.131 | 23 | 0.12  | 23 | 0.159 | 2  | 0.115 | 0.118 | N | 0.57 | SignalP-noTM |
| gj_188521864.gb_ACD59809.1 | 0.198 | 32 | 0.157 | 32 | 0.284 | 13 | 0.135 | 0.147 | N | 0.57 | SignalP-noTM |
| gj_188521865.gb_ACD59810.1 | 0.654 | 28 | 0.763 | 28 | 0.977 | 16 | 0.884 | 0.82  | Y | 0.57 | SignalP-noTM |
| gj_188521867.gb_ACD59812.1 | 0.132 | 21 | 0.24  | 21 | 0.698 | 8  | 0.501 | 0.363 | N | 0.57 | SignalP-noTM |
| gj_188521868.gb_ACD59813.1 | 0.153 | 25 | 0.119 | 25 | 0.127 | 24 | 0.076 | 0.103 | N | 0.51 | SignalP-TM   |
| gj_188521869.gb_ACD59814.1 | 0.156 | 34 | 0.184 | 20 | 0.412 | 18 | 0.308 | 0.243 | N | 0.57 | SignalP-noTM |
| gj_188521870.gb_ACD59815.1 | 0.477 | 28 | 0.641 | 28 | 0.983 | 14 | 0.915 | 0.77  | Y | 0.57 | SignalP-noTM |
| gj_188521871.gb_ACD59816.1 | 0.147 | 21 | 0.116 | 21 | 0.137 | 1  | 0.098 | 0.108 | N | 0.57 | SignalP-noTM |
| gj_188521873.gb_ACD59818.1 | 0.11  | 63 | 0.138 | 11 | 0.257 | 1  | 0.189 | 0.162 | N | 0.57 | SignalP-noTM |
| gj_188521893.gb_ACD59838.1 | 0.474 | 28 | 0.543 | 28 | 0.915 | 20 | 0.751 | 0.641 | Y | 0.57 | SignalP-noTM |
| gj_188521896.gb_ACD59841.1 | 0.268 | 39 | 0.238 | 39 | 0.329 | 31 | 0.19  | 0.215 | N | 0.57 | SignalP-noTM |
| gj_188521897.gb_ACD59842.1 | 0.139 | 33 | 0.164 | 27 | 0.427 | 1  | 0.221 | 0.185 | N | 0.51 | SignalP-TM   |
| gj_188521898.gb_ACD59843.1 | 0.358 | 29 | 0.486 | 29 | 0.834 | 26 | 0.635 | 0.556 | N | 0.57 | SignalP-noTM |
| gj_188521899.gb_ACD59844.1 | 0.173 | 34 | 0.13  | 34 | 0.207 | 15 | 0.119 | 0.125 | N | 0.57 | SignalP-noTM |
| gj_188521900.gb_ACD59845.1 | 0.118 | 36 | 0.124 | 20 | 0.187 | 11 | 0.13  | 0.127 | N | 0.57 | SignalP-noTM |
| gj_188521903.gb_ACD59848.1 | 0.105 | 20 | 0.102 | 62 | 0.139 | 1  | 0.095 | 0.098 | N | 0.57 | SignalP-noTM |
| gj_188521904.gb_ACD59849.1 | 0.147 | 31 | 0.129 | 31 | 0.146 | 18 | 0.115 | 0.123 | N | 0.57 | SignalP-noTM |
| gj_188521905.gb_ACD59850.1 | 0.106 | 54 | 0.122 | 11 | 0.23  | 1  | 0.136 | 0.129 | N | 0.57 | SignalP-noTM |
| gj_188521906.gb_ACD59853.1 | 0.231 | 63 | 0.141 | 63 | 0.247 | 6  | 0.114 | 0.129 | N | 0.57 | SignalP-noTM |
| gj_188521909.gb_ACD59854.1 | 0.149 | 24 | 0.113 | 24 | 0.166 | 30 | 0.088 | 0.101 | N | 0.57 | SignalP-noTM |
| gj_188521910.gb_ACD59855.1 | 0.122 | 31 | 0.16  | 26 | 0.289 | 3  | 0.201 | 0.179 | N | 0.57 | SignalP-noTM |
| gj_188521912.gb_ACD59857.1 | 0.113 | 44 | 0.106 | 68 | 0.124 | 62 | 0.088 | 0.098 | N | 0.57 | SignalP-noTM |
| gj_188521913.gb_ACD59858.1 | 0.16  | 23 | 0.099 | 11 | 0.167 | 3  | 0.097 | 0.098 | N | 0.51 | SignalP-TM   |
| gj_188521914.gb_ACD59859.1 | 0.128 | 39 | 0.113 | 18 | 0.149 | 13 | 0.108 | 0.111 | N | 0.57 | SignalP-noTM |
| gj_188521915.gb_ACD59860.1 | 0.112 | 45 | 0.1   | 45 | 0.12  | 12 | 0.087 | 0.094 | N | 0.57 | SignalP-noTM |
| gj_188521916.gb_ACD59861.1 | 0.134 | 44 | 0.177 | 32 | 0.279 | 20 | 0.196 | 0.186 | N | 0.57 | SignalP-noTM |

|          |          |          |          |                            |
|----------|----------|----------|----------|----------------------------|
| 0.382961 | 0.0527   | 0.681788 | 0.372483 | gj_188521833.gb_ACD59778.1 |
| 0.791171 | 0.828495 | 0.838891 | 0.819519 | gj_188521834.gb_ACD59779.1 |
| 0.252123 | 0.633904 | 0.215853 | 0.368323 | gj_188521839.gb_ACD59784.1 |
| 0.104518 | 0.125538 | 0.087624 | 0.105893 | gj_188521844.gb_ACD59789.1 |
| 0.925117 | 0.907459 | 0.897707 | 0.910094 | gj_188521845.gb_ACD59790.1 |
| 0.105647 | 0.053606 | 0.121319 | 0.093524 | gj_188521851.gb_ACD59796.1 |
| 0.458843 | 0.161109 | 0.432171 | 0.350708 | gj_188521854.gb_ACD59799.1 |
| 0.119413 | 0.026442 | 0.137171 | 0.094342 | gj_188521855.gb_ACD59800.1 |
| 0.168121 | 0.037255 | 0.185579 | 0.130318 | gj_188521856.gb_ACD59801.1 |
| 0.116912 | 0.053302 | 0.120363 | 0.096859 | gj_188521857.gb_ACD59802.1 |
| 0.769058 | 0.07871  | 0.756576 | 0.534781 | gj_188521858.gb_ACD59803.1 |
| 0.535938 | 0.683088 | 0.578105 | 0.599044 | gj_528897485.gb_AGS47851.1 |
| 0.924909 | 0.764228 | 0.875119 | 0.854752 | gj_188521859.gb_ACD59804.1 |
| 0.071028 | 0.002697 | 0.123575 | 0.065767 | gj_188521860.gb_ACD59805.1 |
| 0.940811 | 0.997607 | 0.875447 | 0.937955 | gj_188521861.gb_ACD59806.1 |
| 0.113247 | 0.075508 | 0.104238 | 0.097664 | gj_188521863.gb_ACD59808.1 |
| 0.060882 | 0.000672 | 0.08181  | 0.047788 | gj_188521864.gb_ACD59809.1 |
| 0.950499 | 0.9473   | 0.8966   | 0.931466 | gj_188521865.gb_ACD59810.1 |
| 0.35503  | 0.043397 | 0.44695  | 0.281792 | gj_188521867.gb_ACD59812.1 |
| 0.150844 | 0.13193  | 0.124881 | 0.135885 | gj_188521868.gb_ACD59813.1 |
| 0.940811 | 0.090792 | 0.808455 | 0.613353 | gj_188521869.gb_ACD59814.1 |
| 0.910683 | 0.99952  | 0.857783 | 0.922662 | gj_188521870.gb_ACD59815.1 |
| 0.078928 | 0.048246 | 0.126198 | 0.084457 | gj_188521871.gb_ACD59816.1 |
| 0.168121 | 0.079585 | 0.120999 | 0.122902 | gj_188521873.gb_ACD59818.1 |
| 0.318212 | 0.983905 | 0.320168 | 0.540762 | gj_188521893.gb_ACD59838.1 |
| 0.946849 | 0.998527 | 0.759328 | 0.901568 | gj_188521896.gb_ACD59841.1 |
| 0.10736  | 0.053911 | 0.170654 | 0.110642 | gj_188521897.gb_ACD59842.1 |
| 0.513497 | 0.206361 | 0.560453 | 0.42677  | gj_188521898.gb_ACD59843.1 |
| 0.94131  | 0.997163 | 0.8935   | 0.943991 | gj_188521899.gb_ACD59844.1 |
| 0.852206 | 0.876099 | 0.798991 | 0.842432 | gj_188521900.gb_ACD59845.1 |
| 0.063151 | 0.024292 | 0.1034   | 0.063614 | gj_188521903.gb_ACD59848.1 |
| 0.23041  | 0.057378 | 0.334033 | 0.207274 | gj_188521904.gb_ACD59849.1 |
| 0.089806 | 0.002029 | 0.123575 | 0.071803 | gj_188521905.gb_ACD59850.1 |
| 0.105081 | 0.07385  | 0.105081 |          |                            |

|                            |       |    |       |    |       |    |       |       |   |      |              |
|----------------------------|-------|----|-------|----|-------|----|-------|-------|---|------|--------------|
| gj_188521918_gb_ACD59863.1 | 0.104 | 17 | 0.129 | 30 | 0.185 | 24 | 0.139 | 0.134 | N | 0.57 | SignalP-noTM |
| gj_188521921_gb_ACD59866.1 | 0.107 | 41 | 0.102 | 67 | 0.109 | 42 | 0.084 | 0.094 | N | 0.57 | SignalP-noTM |
| gj_188521922_gb_ACD59867.1 | 0.234 | 28 | 0.359 | 28 | 0.858 | 1  | 0.622 | 0.483 | N | 0.57 | SignalP-noTM |
| gj_188521923_gb_ACD59868.1 | 0.107 | 38 | 0.141 | 38 | 0.294 | 37 | 0.151 | 0.145 | N | 0.51 | SignalP-TM   |
| gj_188521924_gb_ACD59869.1 | 0.121 | 33 | 0.111 | 16 | 0.136 | 6  | 0.107 | 0.109 | N | 0.51 | SignalP-TM   |
| gj_188521925_gb_ACD59870.1 | 0.176 | 24 | 0.351 | 24 | 0.829 | 20 | 0.725 | 0.527 | N | 0.57 | SignalP-noTM |
| gj_188521927_gb_ACD59872.1 | 0.105 | 12 | 0.112 | 38 | 0.156 | 33 | 0.105 | 0.109 | N | 0.57 | SignalP-noTM |
| gj_188521933_gb_ACD59878.1 | 0.497 | 20 | 0.693 | 20 | 0.987 | 10 | 0.957 | 0.817 | Y | 0.57 | SignalP-noTM |
| gj_188521934_gb_ACD59879.1 | 0.351 | 28 | 0.429 | 28 | 0.762 | 21 | 0.524 | 0.473 | N | 0.57 | SignalP-noTM |
| gj_528897486_gb_ACD59883.2 | 0.163 | 56 | 0.138 | 31 | 0.189 | 17 | 0.142 | 0.14  | N | 0.57 | SignalP-noTM |
| gj_188521941_gb_ACD59886.1 | 0.109 | 33 | 0.153 | 11 | 0.322 | 3  | 0.227 | 0.188 | N | 0.57 | SignalP-noTM |
| gj_188521943_gb_ACD59888.1 | 0.169 | 49 | 0.143 | 49 | 0.195 | 12 | 0.113 | 0.137 | N | 0.57 | SignalP-noTM |
| gj_188521945_gb_ACD59890.1 | 0.109 | 52 | 0.128 | 18 | 0.225 | 10 | 0.144 | 0.135 | N | 0.57 | SignalP-noTM |
| gj_188521947_gb_ACD59892.1 | 0.133 | 22 | 0.158 | 22 | 0.292 | 11 | 0.194 | 0.175 | N | 0.57 | SignalP-noTM |
| gj_188521951_gb_ACD59896.1 | 0.109 | 29 | 0.131 | 11 | 0.274 | 1  | 0.162 | 0.146 | N | 0.57 | SignalP-noTM |
| gj_188521957_gb_ACD59902.1 | 0.227 | 46 | 0.189 | 11 | 0.42  | 6  | 0.349 | 0.264 | N | 0.57 | SignalP-noTM |
| gj_188521958_gb_ACD59903.1 | 0.136 | 31 | 0.164 | 31 | 0.298 | 28 | 0.187 | 0.175 | N | 0.57 | SignalP-noTM |
| gj_188521959_gb_ACD59904.1 | 0.238 | 26 | 0.175 | 26 | 0.179 | 1  | 0.125 | 0.151 | N | 0.57 | SignalP-noTM |
| gj_188521960_gb_ACD59905.1 | 0.121 | 20 | 0.178 | 11 | 0.576 | 1  | 0.282 | 0.227 | N | 0.57 | SignalP-noTM |
| gj_188521968_gb_ACD59913.1 | 0.105 | 32 | 0.103 | 32 | 0.126 | 2  | 0.086 | 0.097 | N | 0.51 | SignalP-TM   |
| gj_188521969_gb_ACD59914.1 | 0.166 | 25 | 0.333 | 15 | 0.875 | 6  | 0.817 | 0.56  | N | 0.57 | SignalP-noTM |
| gj_188521971_gb_ACD59916.1 | 0.056 | 42 | 0.144 | 42 | 0.208 | 19 | 0.137 | 0.141 | N | 0.57 | SignalP-noTM |
| gj_188521972_gb_ACD59917.1 | 0.117 | 20 | 0.195 | 18 | 0.424 | 7  | 0.338 | 0.262 | N | 0.57 | SignalP-noTM |
| gj_188521976_gb_ACD59921.1 | 0.154 | 17 | 0.193 | 46 | 0.45  | 35 | 0.168 | 0.181 | N | 0.57 | SignalP-noTM |
| gj_188521977_gb_ACD59922.1 | 0.103 | 39 | 0.097 | 39 | 0.102 | 40 | 0.082 | 0.09  | N | 0.57 | SignalP-noTM |
| gj_188521978_gb_ACD59923.1 | 0.11  | 67 | 0.106 | 43 | 0.135 | 10 | 0.1   | 0.103 | N | 0.57 | SignalP-noTM |
| gj_188521984_gb_ACD59929.1 | 0.102 | 39 | 0.199 | 11 | 0.495 | 2  | 0.386 | 0.287 | N | 0.57 | SignalP-noTM |
| gj_188521985_gb_ACD59930.1 | 0.127 | 27 | 0.142 | 16 | 0.244 | 10 | 0.204 | 0.172 | N | 0.57 | SignalP-noTM |
| gj_188521987_gb_ACD59932.1 | 0.101 | 49 | 0.213 | 14 | 0.524 | 10 | 0.444 | 0.322 | N | 0.57 | SignalP-noTM |
| gj_188521988_gb_ACD59933.1 | 0.199 | 38 | 0.177 | 38 | 0.292 | 2  | 0.192 | 0.183 | N | 0.51 | SignalP-TM   |
| gj_188521989_gb_ACD59934.1 | 0.14  | 44 | 0.218 | 44 | 0.687 | 40 | 0.177 | 0.199 | N | 0.57 | SignalP-noTM |
| gj_188522002_gb_ACD59947.1 | 0.104 | 8  | 0.1   | 44 | 0.113 | 42 | 0.086 | 0.093 | N | 0.57 | SignalP-noTM |
| gj_188522003_gb_ACD59948.1 | 0.116 | 17 | 0.159 | 17 | 0.272 | 14 | 0.215 | 0.185 | N | 0.57 | SignalP-noTM |
| gj_188522005_gb_ACD59950.1 | 0.112 | 61 | 0.124 | 12 | 0.191 | 9  | 0.159 | 0.141 | N | 0.57 | SignalP-noTM |
| gj_188522006_gb_ACD59951.1 | 0.113 | 26 | 0.114 | 55 | 0.165 | 51 | 0.088 | 0.101 | N | 0.57 | SignalP-noTM |
| gj_188522007_gb_ACD59952.1 | 0.114 | 40 | 0.105 | 48 | 0.13  | 50 | 0.089 | 0.098 | N | 0.57 | SignalP-noTM |
| gj_188522008_gb_ACD59953.1 | 0.169 | 36 | 0.202 | 11 | 0.558 | 1  | 0.392 | 0.291 | N | 0.57 | SignalP-noTM |
| gj_188522011_gb_ACD59956.1 | 0.192 | 30 | 0.186 | 30 | 0.411 | 12 | 0.271 | 0.226 | N | 0.57 | SignalP-noTM |
| gj_188522012_gb_ACD59957.1 | 0.149 | 25 | 0.127 | 25 | 0.163 | 2  | 0.12  | 0.124 | N | 0.57 | SignalP-noTM |
| gj_188522013_gb_ACD59958.1 | 0.111 | 27 | 0.124 | 11 | 0.206 | 5  | 0.167 | 0.14  | N | 0.51 | SignalP-TM   |
| gj_188522014_gb_ACD59959.1 | 0.121 | 30 | 0.15  | 11 | 0.313 | 4  | 0.23  | 0.188 | N | 0.57 | SignalP-noTM |
| gj_188522015_gb_ACD59960.1 | 0.151 | 17 | 0.135 | 17 | 0.223 | 16 | 0.113 | 0.125 | N | 0.57 | SignalP-noTM |
| gj_188522017_gb_ACD59962.1 | 0.107 | 5  | 0.153 | 11 | 0.403 | 1  | 0.217 | 0.183 | N | 0.57 | SignalP-noTM |
| gj_188522020_gb_ACD59965.1 | 0.104 | 28 | 0.147 | 12 | 0.254 | 11 | 0.213 | 0.178 | N | 0.57 | SignalP-noTM |
| gj_188522023_gb_ACD59968.1 | 0.212 | 20 | 0.131 | 20 | 0.126 | 17 | 0.082 | 0.108 | N | 0.57 | SignalP-noTM |
| gj_188522024_gb_ACD59969.1 | 0.123 | 29 | 0.165 | 19 | 0.411 | 1  | 0.241 | 0.201 | N | 0.57 | SignalP-noTM |
| gj_188522027_gb_ACD59972.1 | 0.112 | 53 | 0.124 | 13 | 0.276 | 11 | 0.153 | 0.137 | N | 0.57 | SignalP-noTM |
| gj_188522040_gb_ACD59985.1 | 0.131 | 16 | 0.136 | 16 | 0.266 | 14 | 0.14  | 0.138 | N | 0.57 | SignalP-noTM |
| gj_188522052_gb_ACD59997.1 | 0.241 | 29 | 0.201 | 29 | 0.29  | 24 | 0.192 | 0.197 | N | 0.57 | SignalP-noTM |
| gj_188522054_gb_ACD59999.1 | 0.109 | 25 | 0.102 | 63 | 0.125 | 51 | 0.096 | 0.099 | N | 0.57 | SignalP-noTM |
| gj_188522055_gb_ACD60001.1 | 0.123 | 27 | 0.121 | 46 | 0.198 | 34 | 0.121 | 0.121 | N | 0.57 | SignalP-noTM |
| gj_188522056_gb_ACD60001.1 | 0.128 | 59 | 0.104 | 39 | 0.115 | 34 | 0.079 | 0.092 | N | 0.57 | SignalP-noTM |
| gj_188522058_gb_ACD60003.1 | 0.411 | 21 | 0.358 | 21 | 0.512 | 16 | 0.275 | 0.319 | N | 0.57 | SignalP-noTM |
| gj_188522061_gb_ACD60006.1 | 0.116 | 43 | 0.141 | 43 | 0.259 | 42 | 0.146 | 0.143 | N | 0.57 | SignalP-noTM |
| gj_188522067_gb_ACD60012.1 | 0.115 | 33 | 0.117 | 11 | 0.167 | 3  | 0.135 | 0.125 | N | 0.57 | SignalP-noTM |
| gj_188522072_gb_ACD60017.1 | 0.112 | 65 | 0.167 | 11 | 0.385 | 2  | 0.272 | 0.216 | N | 0.57 | SignalP-noTM |
| gj_188522073_gb_ACD60018.1 | 0.187 | 31 | 0.167 | 31 | 0.226 | 14 | 0.146 | 0.157 | N | 0.57 | SignalP-noTM |
| gj_188522074_gb_ACD60019.1 | 0.142 | 30 | 0.106 | 30 | 0.186 | 1  | 0.082 | 0.095 | N | 0.57 | SignalP-noTM |
| gj_188522075_gb_ACD60020.1 | 0.276 | 66 | 0.196 | 66 | 0.239 | 51 | 0.151 | 0.175 | N | 0.57 | SignalP-noTM |
| gj_188522076_gb_ACD60021.1 | 0.118 | 19 | 0.123 | 35 | 0.22  | 31 | 0.127 | 0.125 | N | 0.57 | SignalP-noTM |
| gj_188522077_gb_ACD60022.1 | 0.181 | 21 | 0.182 | 21 | 0.304 | 19 | 0.178 | 0.181 | N | 0.51 | SignalP-TM   |
| gj_188522078_gb_ACD60023.1 | 0.276 | 35 | 0.235 | 35 | 0.337 | 2  | 0.207 | 0.224 | N | 0.51 | SignalP-TM   |
| gj_188522079_gb_ACD60024.1 | 0.159 | 20 | 0.195 | 20 | 0.319 | 17 | 0.197 | 0.196 | N | 0.57 | SignalP-noTM |
| gj_188522080_gb_ACD60025.1 | 0.124 | 23 | 0.198 | 23 | 0.429 | 1  | 0.326 | 0.245 | N | 0.51 | SignalP-TM   |
| gj_188522081_gb_ACD60026.1 | 0.197 | 20 | 0.192 | 11 | 0.567 | 2  | 0.341 | 0.262 | N | 0.57 | SignalP-noTM |
| gj_188522082_gb_ACD60027.1 | 0.113 | 12 | 0.111 | 33 | 0.145 | 24 | 0.097 | 0.104 | N | 0.57 | SignalP-noTM |
| gj_188522083_gb_ACD60028.1 | 0.138 | 57 | 0.11  | 57 | 0.102 | 22 | 0.087 | 0.099 | N | 0.57 | SignalP-noTM |
| gj_188522084_gb_ACD60029.1 | 0.15  | 33 | 0.111 | 33 | 0.134 | 43 | 0.082 | 0.098 | N | 0.57 | SignalP-noTM |
| gj_188522085_gb_ACD60030.1 | 0.127 | 40 | 0.122 | 24 | 0.201 | 20 | 0.12  | 0.121 | N | 0.57 | SignalP-noTM |
| gj_188522086_gb_ACD60031.1 | 0.232 | 44 | 0.244 | 44 | 0.413 | 40 | 0.219 | 0.235 | N | 0.51 | SignalP-TM   |
| gj_188522087_gb_ACD60032.1 | 0.16  | 24 | 0.192 | 24 | 0.274 | 15 | 0.195 | 0.193 | N | 0.57 | SignalP-noTM |
| gj_188522088_gb_ACD60033.1 | 0.126 | 19 | 0.159 | 19 | 0.296 | 1  | 0.217 | 0.181 | N | 0.51 | SignalP-TM   |
| gj_188522089_gb_ACD60034.1 | 0.108 | 34 | 0.111 | 34 | 0.13  | 31 | 0.091 | 0.102 | N | 0.57 | SignalP-noTM |
| gj_188522090_gb_ACD60035.1 | 0.171 | 41 | 0.243 | 41 | 0.613 | 35 | 0.252 | 0.247 | N | 0.57 | SignalP-noTM |
| gj_188522091_gb_ACD60036.1 | 0.106 | 21 | 0.105 | 21 | 0.141 | 13 | 0.104 | 0.104 | N | 0.57 | SignalP-noTM |
| gj_188522092_gb_ACD60037.1 | 0.186 | 67 | 0.142 | 67 | 0.134 | 52 | 0.107 | 0.125 | N | 0.57 | SignalP-noTM |
| gj_188522093_gb_ACD60038.1 | 0.107 | 16 | 0.102 | 28 | 0.111 | 15 | 0.083 | 0.093 | N | 0.57 | SignalP-noTM |
| gj_188522094_gb_ACD60039.1 | 0.106 | 29 | 0.13  | 11 | 0.264 | 1  | 0.157 | 0.143 | N | 0.57 | SignalP-noTM |

|          |          |          |            |                            |
|----------|----------|----------|------------|----------------------------|
| 0.269138 | 0.985699 | 0.152775 | 0.469204   | gj_188521666_gb_ACD59611.1 |
| 0.10147  | 0.773293 | 0.254074 | 0.376279   | gj_188521667_gb_ACD59612.1 |
| 0.119098 | 0.157892 | 0.068881 | 0.11529    | gj_188521668_gb_ACD59613.1 |
| 0.937556 | 0.999435 | 0.885238 | 0.940743   | gj_188521669_gb_ACD59614.1 |
| 0.173217 | 0.328716 | 0.136108 | 0.21268    | gj_188521670_gb_ACD59615.1 |
| 0.172787 | 0.037906 | 0.200047 | 0.136913   | gj_188521671_gb_ACD59616.1 |
| 0.220458 | 0.542646 | 0.110563 | 0.291222   | gj_188521672_gb_ACD59617.1 |
| 0.143318 | 0.323442 | 0.109389 | 0.19205    | gj_188521673_gb_ACD59618.1 |
| 0.122827 | 0.127527 | 0.257501 | 0.169318   | gj_188521674_gb_ACD59619.1 |
| 0.239031 | 0.826353 | 0.242872 | 0.436085   | gj_188521675_gb_ACD59620.1 |
| 0.149313 | 0.049501 | 0.143318 | 0.114044   | gj_188521676_gb_ACD59621.1 |
| 0.13193  | 0.072831 | 0.179314 | 0.128025   | gj_188521680_gb_ACD59625.1 |
| 0.120681 | 0.080913 | 0.14629  | 0.115961   | gj_188521687_gb_ACD59632.1 |
| 0.206853 | 0.097176 | 0.240672 | 0.181567   | gj_188521688_gb_ACD59633.1 |
| 0.080025 | 0.007182 | 0.15046  | 0.079222   | gj_188521690_gb_ACD59635.1 |
| 0.242872 | 0.112645 | 0.270912 | 0.20881    | gj_188521691_gb_ACD59636.1 |
| 0.129544 | 0.010231 | 0.127527 | 0.089101   | gj_188521692_gb_ACD59637.1 |
| 0.530711 | 0.819357 | 0.443986 | 0.598018   | gj_188521693_gb_ACD59638.1 |
| 0.086196 | 0.053911 | 0.13331  | 0.091139   | gj_188521802_gb_ACD59747.1 |
| 0.13717  | 0.009194 | 0.180643 | 0.109002   | gj_188521968_gb_ACD59913.1 |
| 0.137881 | 0.001665 | 0.227761 | 0.122436   | gj_188521969_gb_ACD59914.1 |
| 0.300273 | 0.658586 | 0.36749  | 0.442116   | gj_188521971_gb_ACD59916.1 |
| 0.792654 | 0.990301 | 0.805182 | 0.862712   | gj_188521972_gb_ACD59917.1 |
| 0.915908 | 0.943588 | 0.830194 | 0.896563   | gj_188521976_gb_ACD59921.1 |
| 0.072831 | 0.089074 | 0.17023  | 0.110712   | gj_188521977_gb_ACD59922.1 |
| 0.144056 | 0.074883 | 0.177994 | 0.132311   | gj_188521978_gb_ACD59923.1 |
| 0.177555 | 0.791666 | 0.083173 | 0.350798   | gj_188521984_gb_ACD59929.1 |
| 0.424824 | 0.38509  | 0.560453 | 0.456789   | gj_188521985_gb_ACD59930.1 |
| 0.438808 | 0.988026 | 0.488002 | 0.638279   | gj_188521987_gb_ACD59932.1 |
| 0.136755 | 0.047562 | 0.220458 | 0.134592   | gj_188521988_gb_ACD59933.1 |
| 0.793147 | 0.158691 | 0.715856 | 0.555898   | gj_188521989_gb_ACD59934.1 |
| 0.143318 | 0.182426 | 0.295254 | 0.206999</ |                            |

|                            |       |    |       |    |       |    |       |       |   |      |              |  |
|----------------------------|-------|----|-------|----|-------|----|-------|-------|---|------|--------------|--|
| gj_188522095_gb_ACD60040.1 | 0.159 | 30 | 0.207 | 12 | 0.506 | 1  | 0.409 | 0.302 | N | 0.57 | SignalP-noTM |  |
| gj_188522096_gb_ACD60041.1 | 0.101 | 33 | 0.109 | 11 | 0.165 | 1  | 0.114 | 0.111 | N | 0.57 | SignalP-noTM |  |
| gj_188522099_gb_ACD60044.1 | 0.106 | 25 | 0.113 | 11 | 0.209 | 3  | 0.127 | 0.119 | N | 0.57 | SignalP-noTM |  |
| gj_188522100_gb_ACD60045.1 | 0.233 | 37 | 0.166 | 37 | 0.156 | 35 | 0.103 | 0.137 | N | 0.57 | SignalP-noTM |  |
| gj_188522101_gb_ACD60046.1 | 0.134 | 19 | 0.111 | 63 | 0.147 | 39 | 0.098 | 0.105 | N | 0.57 | SignalP-noTM |  |
| gj_188522102_gb_ACD60047.1 | 0.108 | 59 | 0.134 | 18 | 0.248 | 13 | 0.165 | 0.149 | N | 0.57 | SignalP-noTM |  |
| gj_188522103_gb_ACD60048.1 | 0.144 | 25 | 0.114 | 25 | 0.163 | 23 | 0.091 | 0.103 | N | 0.57 | SignalP-noTM |  |
| gj_188522104_gb_ACD60049.1 | 0.395 | 25 | 0.457 | 25 | 0.177 | 20 | 0.451 | 0.454 | N | 0.57 | SignalP-noTM |  |
| gj_188522105_gb_ACD60050.1 | 0.123 | 36 | 0.107 | 36 | 0.109 | 9  | 0.086 | 0.097 | N | 0.57 | SignalP-noTM |  |
| gj_188522106_gb_ACD60051.1 | 0.137 | 16 | 0.159 | 16 | 0.351 | 16 | 0.168 | 0.163 | N | 0.57 | SignalP-noTM |  |
| gj_188522107_gb_ACD60052.1 | 0.111 | 26 | 0.158 | 11 | 0.345 | 7  | 0.253 | 0.203 | N | 0.57 | SignalP-noTM |  |
| gj_188522108_gb_ACD60053.1 | 0.124 | 41 | 0.127 | 41 | 0.195 | 39 | 0.106 | 0.117 | N | 0.57 | SignalP-noTM |  |
| gj_188522109_gb_ACD60054.1 | 0.143 | 42 | 0.115 | 25 | 0.14  | 23 | 0.113 | 0.114 | N | 0.57 | SignalP-noTM |  |
| gj_188522110_gb_ACD60055.1 | 0.106 | 49 | 0.111 | 30 | 0.155 | 8  | 0.115 | 0.112 | N | 0.57 | SignalP-noTM |  |
| gj_188522122_gb_ACD60067.1 | 0.144 | 29 | 0.113 | 29 | 0.124 | 10 | 0.098 | 0.106 | N | 0.57 | SignalP-noTM |  |
| gj_188522125_gb_ACD60070.1 | 0.117 | 41 | 0.119 | 41 | 0.155 | 40 | 0.101 | 0.111 | N | 0.57 | SignalP-noTM |  |
| gj_188522126_gb_ACD60071.1 | 0.175 | 38 | 0.114 | 38 | 0.113 | 6  | 0.074 | 0.095 | N | 0.57 | SignalP-noTM |  |
| gj_188522127_gb_ACD60072.1 | 0.111 | 17 | 0.158 | 11 | 0.344 | 1  | 0.238 | 0.196 | N | 0.57 | SignalP-noTM |  |
| gj_188522151_gb_ACD60096.1 | 0.152 | 27 | 0.158 | 27 | 0.394 | 1  | 0.179 | 0.168 | N | 0.57 | SignalP-noTM |  |
| gj_188522161_gb_ACD60106.1 | 0.101 | 33 | 0.103 | 21 | 0.138 | 10 | 0.092 | 0.098 | N | 0.57 | SignalP-noTM |  |
| gj_188522167_gb_ACD60112.1 | 0.137 | 35 | 0.176 | 22 | 0.417 | 25 | 0.235 | 0.204 | N | 0.57 | SignalP-noTM |  |
| gj_188522173_gb_ACD60118.1 | 0.108 | 23 | 0.127 | 11 | 0.244 | 1  | 0.144 | 0.135 | N | 0.57 | SignalP-noTM |  |
| gj_188522178_gb_ACD60123.1 | 0.119 | 28 | 0.185 | 11 | 0.508 | 1  | 0.329 | 0.238 | N | 0.51 | SignalIP-TM  |  |
| gj_188522179_gb_ACD60124.1 | 0.162 | 24 | 0.201 | 24 | 0.568 | 1  | 0.296 | 0.245 | N | 0.57 | SignalP-noTM |  |
| gj_188522181_gb_ACD60126.1 | 0.105 | 48 | 0.117 | 35 | 0.165 | 9  | 0.123 | 0.12  | N | 0.57 | SignalP-noTM |  |
| gj_188522182_gb_ACD60127.1 | 0.151 | 59 | 0.127 | 46 | 0.175 | 41 | 0.108 | 0.118 | N | 0.57 | SignalP-noTM |  |
| gj_188522185_gb_ACD60130.1 | 0.133 | 22 | 0.119 | 11 | 0.234 | 1  | 0.129 | 0.124 | N | 0.57 | SignalP-noTM |  |
| gj_188522187_gb_ACD60132.1 | 0.135 | 18 | 0.101 | 48 | 0.123 | 38 | 0.083 | 0.093 | N | 0.57 | SignalP-noTM |  |
| gj_188522188_gb_ACD60133.1 | 0.129 | 21 | 0.103 | 38 | 0.118 | 32 | 0.081 | 0.093 | N | 0.57 | SignalP-noTM |  |
| gj_188522189_gb_ACD60134.1 | 0.155 | 21 | 0.161 | 11 | 0.419 | 2  | 0.249 | 0.194 | N | 0.51 | SignalIP-TM  |  |
| gj_188522190_gb_ACD60135.1 | 0.177 | 27 | 0.154 | 27 | 0.315 | 1  | 0.157 | 0.155 | N | 0.51 | SignalIP-TM  |  |
| gj_188522194_gb_ACD60139.1 | 0.599 | 27 | 0.64  | 27 | 0.94  | 1  | 0.785 | 0.708 | Y | 0.57 | SignalP-noTM |  |
| gj_188522204_gb_ACD60149.1 | 0.153 | 32 | 0.165 | 32 | 0.393 | 29 | 0.205 | 0.184 | N | 0.57 | SignalP-noTM |  |
| gj_188522205_gb_ACD60150.1 | 0.192 | 10 | 0.266 | 19 | 0.719 | 8  | 0.424 | 0.34  | N | 0.57 | SignalP-noTM |  |
| gj_188522206_gb_ACD60151.1 | 0.118 | 32 | 0.104 | 32 | 0.119 | 2  | 0.093 | 0.099 | N | 0.57 | SignalP-noTM |  |
| gj_188522211_gb_ACD60156.1 | 0.245 | 23 | 0.491 | 23 | 0.992 | 19 | 0.977 | 0.72  | Y | 0.57 | SignalP-noTM |  |
| gj_188522212_gb_ACD60157.1 | 0.225 | 44 | 0.163 | 44 | 0.358 | 3  | 0.181 | 0.171 | N | 0.57 | SignalP-noTM |  |
| gj_188522213_gb_ACD60158.1 | 0.109 | 43 | 0.103 | 43 | 0.11  | 61 | 0.091 | 0.098 | N | 0.57 | SignalP-noTM |  |
| gj_188522214_gb_ACD60159.1 | 0.134 | 39 | 0.152 | 54 | 0.277 | 50 | 0.121 | 0.137 | N | 0.57 | SignalP-noTM |  |
| gj_188522215_gb_ACD60160.1 | 0.102 | 11 | 0.125 | 11 | 0.185 | 3  | 0.154 | 0.138 | N | 0.57 | SignalP-noTM |  |
| gj_188522216_gb_ACD60161.1 | 0.594 | 26 | 0.593 | 26 | 0.898 | 8  | 0.703 | 0.645 | Y | 0.57 | SignalP-noTM |  |
| gj_188522220_gb_ACD60165.1 | 0.105 | 43 | 0.111 | 16 | 0.162 | 7  | 0.115 | 0.113 | N | 0.57 | SignalP-noTM |  |
| gj_188522223_gb_ACD60168.1 | 0.109 | 19 | 0.111 | 14 | 0.147 | 4  | 0.12  | 0.115 | N | 0.57 | SignalP-noTM |  |
| gj_188522227_gb_ACD60172.1 | 0.824 | 25 | 0.863 | 25 | 0.976 | 10 | 0.925 | 0.892 | Y | 0.57 | SignalP-noTM |  |
| gj_188522228_gb_ACD60173.1 | 0.105 | 45 | 0.101 | 45 | 0.16  | 42 | 0.082 | 0.092 | N | 0.57 | SignalP-noTM |  |
| gj_188522229_gb_ACD60174.1 | 0.342 | 46 | 0.52  | 46 | 0.978 | 30 | 0.74  | 0.624 | Y | 0.57 | SignalP-noTM |  |
| gj_188522230_gb_ACD60175.1 | 0.169 | 47 | 0.184 | 47 | 0.317 | 45 | 0.165 | 0.177 | N | 0.51 | SignalIP-TM  |  |
| gj_188522232_gb_ACD60177.1 | 0.12  | 50 | 0.111 | 50 | 0.113 | 43 | 0.088 | 0.1   | N | 0.57 | SignalP-noTM |  |
| gj_188522240_gb_ACD60185.1 | 0.148 | 38 | 0.127 | 38 | 0.151 | 34 | 0.098 | 0.113 | N | 0.57 | SignalP-noTM |  |
| gj_188522241_gb_ACD60186.1 | 0.318 | 25 | 0.467 | 23 | 0.817 | 19 | 0.667 | 0.561 | N | 0.57 | SignalP-noTM |  |
| gj_188522246_gb_ACD60191.1 | 0.112 | 29 | 0.127 | 11 | 0.288 | 1  | 0.144 | 0.133 | N | 0.51 | SignalIP-TM  |  |
| gj_188522247_gb_ACD60192.1 | 0.598 | 49 | 0.532 | 49 | 0.725 | 44 | 0.349 | 0.464 | N | 0.51 | SignalIP-TM  |  |
| gj_188522367_gb_ACD60312.1 | 0.125 | 47 | 0.142 | 47 | 0.2   | 40 | 0.113 | 0.129 | N | 0.57 | SignalP-noTM |  |
| gj_188522368_gb_ACD60313.1 | 0.14  | 20 | 0.153 | 20 | 0.214 | 4  | 0.177 | 0.164 | N | 0.57 | SignalP-noTM |  |
| gj_188522371_gb_ACD60316.1 | 0.162 | 30 | 0.123 | 30 | 0.237 | 42 | 0.089 | 0.107 | N | 0.57 | SignalP-noTM |  |
| gj_188522389_gb_ACD60334.1 | 0.264 | 28 | 0.382 | 28 | 0.734 | 7  | 0.589 | 0.459 | N | 0.51 | SignalIP-TM  |  |
| gj_188522390_gb_ACD60335.1 | 0.112 | 66 | 0.175 | 51 | 0.392 | 38 | 0.157 | 0.167 | N | 0.57 | SignalP-noTM |  |
| gj_188522391_gb_ACD60336.1 | 0.128 | 19 | 0.139 | 11 | 0.298 | 1  | 0.178 | 0.157 | N | 0.57 | SignalP-noTM |  |
| gj_188522392_gb_ACD60337.1 | 0.34  | 21 | 0.247 | 21 | 0.286 | 19 | 0.193 | 0.222 | N | 0.57 | SignalP-noTM |  |
| gj_188522393_gb_ACD60338.1 | 0.158 | 31 | 0.131 | 31 | 0.221 | 23 | 0.112 | 0.122 | N | 0.57 | SignalP-noTM |  |
| gj_188522394_gb_ACD60339.1 | 0.121 | 24 | 0.136 | 24 | 0.185 | 14 | 0.136 | 0.136 | N | 0.57 | SignalP-noTM |  |
| gj_188522395_gb_ACD60340.1 | 0.257 | 16 | 0.319 | 16 | 0.642 | 12 | 0.4   | 0.357 | N | 0.57 | SignalP-noTM |  |
| gj_188522396_gb_ACD60341.1 | 0.132 | 61 | 0.109 | 13 | 0.174 | 11 | 0.113 | 0.111 | N | 0.57 | SignalP-noTM |  |
| gj_188522406_gb_ACD60351.1 | 0.132 | 27 | 0.244 | 11 | 0.698 | 4  | 0.608 | 0.379 | N | 0.51 | SignalIP-TM  |  |
| gj_188522407_gb_ACD60352.1 | 0.101 | 31 | 0.167 | 18 | 0.356 | 13 | 0.259 | 0.21  | N | 0.57 | SignalP-noTM |  |
| gj_188522412_gb_ACD60357.1 | 0.149 | 63 | 0.208 | 16 | 0.51  | 7  | 0.431 | 0.291 | N | 0.51 | SignalIP-TM  |  |
| gj_188522414_gb_ACD60359.1 | 0.213 | 21 | 0.173 | 21 | 0.227 | 19 | 0.128 | 0.152 | N | 0.57 | SignalP-noTM |  |
| gj_188522421_gb_ACD60366.1 | 0.167 | 24 | 0.174 | 24 | 0.338 | 11 | 0.219 | 0.195 | N | 0.57 | SignalP-noTM |  |
| gj_188522428_gb_ACD60373.1 | 0.109 | 51 | 0.176 | 11 | 0.386 | 5  | 0.315 | 0.241 | N | 0.57 | SignalP-noTM |  |
| gj_188522429_gb_ACD60374.1 | 0.1   | 26 | 0.106 | 42 | 0.15  | 4  | 0.099 | 0.103 | N | 0.57 | SignalP-noTM |  |
| gj_188522430_gb_ACD60375.1 | 0.113 | 61 | 0.107 | 37 | 0.126 | 33 | 0.09  | 0.099 | N | 0.57 | SignalP-noTM |  |
| gj_188522431_gb_ACD60376.1 | 0.117 | 37 | 0.109 | 37 | 0.109 | 41 | 0.088 | 0.099 | N | 0.57 | SignalP-noTM |  |
| gj_188522435_gb_ACD60380.1 | 0.156 | 22 | 0.138 | 22 | 0.219 | 1  | 0.137 | 0.138 | N | 0.57 | SignalP-noTM |  |
| gj_188522436_gb_ACD60381.1 | 0.115 | 29 | 0.143 | 11 | 0.253 | 4  | 0.205 | 0.172 | N | 0.57 | SignalP-noTM |  |
| gj_188522437_gb_ACD60382.1 | 0.111 | 27 | 0.14  | 18 | 0.24  | 16 | 0.179 | 0.159 | N | 0.57 | SignalP-noTM |  |
| gj_188522438_gb_ACD60383.1 | 0.127 | 59 | 0.122 | 59 | 0.144 | 49 | 0.108 | 0.115 | N | 0.57 | SignalP-noTM |  |
| gj_188522439_gb_ACD60384.1 | 0.132 | 30 | 0.232 | 30 | 0.556 | 17 | 0.356 | 0.29  | N | 0.57 | SignalP-noTM |  |
| gj_188522440_gb_ACD60385.1 | 0.183 | 41 | 0.196 | 41 | 0.307 | 38 | 0.168 | 0.186 | N | 0.51 | SignalIP-TM  |  |

|          |          |          |          |                            |
|----------|----------|----------|----------|----------------------------|
| 0.103958 | 0.039354 | 0.168541 | 0.103951 | gj_188522095_gb_ACD60040.1 |
| 0.138238 | 0.208829 | 0.108225 | 0.151764 | gj_188522096_gb_ACD60041.1 |
| 0.297757 | 0.350236 | 0.415324 | 0.354439 | gj_188522099_gb_ACD60044.1 |
| 0.127527 | 0.0298   | 0.209822 | 0.122383 | gj_188522100_gb_ACD60045.1 |
| 0.961321 | 0.999377 | 0.869438 | 0.943379 | gj_188522101_gb_ACD60046.1 |
| 0.114153 | 0.054526 | 0.131244 | 0.099974 | gj_188522102_gb_ACD60047.1 |
| 0.092038 | 0.000929 | 0.23308  | 0.108682 | gj_188522103_gb_ACD60048.1 |
| 0.091289 | 0.077629 | 0.171931 | 0.113616 | gj_188522104_gb_ACD60049.1 |
| 0.056572 | 0.006356 | 0.112645 | 0.058534 | gj_188522105_gb_ACD60050.1 |
| 0.227233 | 0.357094 | 0.430699 | 0.338342 | gj_188522106_gb_ACD60051.1 |
| 0.38749  | 0.98016  | 0.187856 | 0.511835 | gj_188522107_gb_ACD60052.1 |
| 0.186487 | 0.753246 | 0.09744  | 0.345724 | gj_188522108_gb_ACD60053.1 |
| 0.182873 | 0.191545 | 0.132964 | 0.169127 | gj_188522109_gb_ACD60054.1 |
| 0.232009 | 0.58686  | 0.23308  | 0.35065  | gj_188522110_gb_ACD60055.1 |
| 0.07635  | 0.034656 | 0.126861 | 0.079289 | gj_188522122_gb_ACD60067.1 |
| 0.072426 | 0.002633 | 0.122282 | 0.06578  | gj_188522125_gb_ACD60070.1 |
| 0.113548 | 0.052252 | 0.136461 | 0.100754 | gj_188522126_gb_ACD60071.1 |
| 0.926967 | 0.653849 | 0.858149 | 0.812988 | gj_188522127_gb_ACD60072.1 |
| 0.186487 | 0.272693 | 0.171931 | 0.21037  | gj_188522151_gb_ACD60096.1 |
| 0.155119 | 0.996046 | 0.366793 | 0.505986 | gj_188522161_gb_ACD60106.1 |
| 0.129882 | 0.03704  | 0.195289 | 0.120737 | gj_188522167_gb_ACD60112.1 |
| 0.690829 | 0.987258 | 0.829346 | 0.835811 | gj_188522173_gb_ACD60118.1 |
| 0.919639 | 0.991886 | 0.850687 | 0.920404 | gj_188522178_gb_ACD60123.1 |
| 0.297757 | 0.508249 | 0.35503  | 0.387012 | gj_188522179_gb_ACD60124.1 |
| 0.956212 | 0.998721 | 0.802342 | 0.918758 | gj_188522181_gb_ACD60126.1 |
| 0.663962 | 0.816678 | 0.557495 | 0.679378 | gj_188522182_gb_ACD60127.1 |
| 0.157892 | 0.945008 | 0.109389 | 0.404096 | gj_188522185_gb_ACD60130.1 |
| 0.075718 | 0.003966 | 0.113247 | 0.06431  | gj_188522187_gb_ACD60132.1 |



|                            |       |    |       |    |       |    |       |       |   |      |              |  |
|----------------------------|-------|----|-------|----|-------|----|-------|-------|---|------|--------------|--|
| gj_188522587_gb_ACD605321_ | 0.875 | 22 | 0.898 | 22 | 0.951 | 17 | 0.903 | 0.9   | Y | 0.57 | SignalP-noTM |  |
| gj_188522589_gb_ACD605341_ | 0.518 | 25 | 0.63  | 25 | 0.932 | 19 | 0.779 | 0.7   | Y | 0.57 | SignalP-noTM |  |
| gj_188522590_gb_ACD605351_ | 0.215 | 32 | 0.432 | 32 | 0.945 | 15 | 0.876 | 0.641 | Y | 0.57 | SignalP-noTM |  |
| gj_188522594_gb_ACD605391_ | 0.107 | 19 | 0.114 | 58 | 0.159 | 51 | 0.116 | 0.115 | N | 0.57 | SignalP-noTM |  |
| gj_188522607_gb_ACD605521_ | 0.118 | 26 | 0.133 | 11 | 0.279 | 1  | 0.163 | 0.147 | N | 0.57 | SignalP-noTM |  |
| gj_188522608_gb_ACD605531_ | 0.163 | 56 | 0.127 | 12 | 0.236 | 11 | 0.157 | 0.141 | N | 0.57 | SignalP-noTM |  |
| gj_188522609_gb_ACD605541_ | 0.104 | 29 | 0.104 | 65 | 0.118 | 55 | 0.094 | 0.099 | N | 0.57 | SignalP-noTM |  |
| gj_188522610_gb_ACD605551_ | 0.194 | 55 | 0.149 | 55 | 0.175 | 32 | 0.129 | 0.139 | N | 0.57 | SignalP-noTM |  |
| gj_528897493_gb_ACD605572_ | 0.122 | 66 | 0.115 | 66 | 0.198 | 1  | 0.104 | 0.111 | N | 0.57 | SignalP-noTM |  |
| gj_188522613_gb_ACD605581_ | 0.128 | 24 | 0.166 | 24 | 0.278 | 1  | 0.233 | 0.191 | N | 0.51 | SignalP-TM   |  |
| gj_188522614_gb_ACD605591_ | 0.107 | 32 | 0.124 | 57 | 0.17  | 53 | 0.117 | 0.121 | N | 0.57 | SignalP-noTM |  |
| gj_188522616_gb_ACD605611_ | 0.116 | 66 | 0.12  | 58 | 0.201 | 1  | 0.109 | 0.115 | N | 0.57 | SignalP-noTM |  |
| gj_188522617_gb_ACD605621_ | 0.279 | 32 | 0.126 | 32 | 0.215 | 14 | 0.111 | 0.12  | N | 0.51 | SignalP-TM   |  |
| gj_528897494_gb_ACD605652_ | 0.116 | 66 | 0.119 | 58 | 0.201 | 1  | 0.108 | 0.114 | N | 0.57 | SignalP-noTM |  |
| gj_188522621_gb_ACD605661_ | 0.214 | 32 | 0.122 | 49 | 0.207 | 47 | 0.1   | 0.114 | N | 0.51 | SignalP-TM   |  |
| gj_528897495_gb_ACD605692_ | 0.116 | 66 | 0.12  | 58 | 0.201 | 1  | 0.109 | 0.115 | N | 0.57 | SignalP-noTM |  |
| gj_188522625_gb_ACD605701_ | 0.128 | 24 | 0.156 | 24 | 0.253 | 1  | 0.209 | 0.176 | N | 0.51 | SignalP-TM   |  |
| gj_528897496_gb_ACD605732_ | 0.116 | 66 | 0.12  | 58 | 0.201 | 1  | 0.109 | 0.115 | N | 0.57 | SignalP-noTM |  |
| gj_188522630_gb_ACD605751_ | 0.283 | 32 | 0.272 | 32 | 0.565 | 13 | 0.338 | 0.303 | N | 0.57 | SignalP-noTM |  |
| gj_188522631_gb_ACD605761_ | 0.175 | 33 | 0.146 | 33 | 0.213 | 32 | 0.109 | 0.129 | N | 0.57 | SignalP-noTM |  |
| gj_188522633_gb_ACD605781_ | 0.221 | 26 | 0.204 | 26 | 0.252 | 14 | 0.192 | 0.198 | N | 0.57 | SignalP-noTM |  |
| gj_188522634_gb_ACD605791_ | 0.102 | 41 | 0.133 | 17 | 0.215 | 12 | 0.18  | 0.155 | N | 0.57 | SignalP-noTM |  |
| gj_188522635_gb_ACD605801_ | 0.15  | 36 | 0.149 | 11 | 0.28  | 4  | 0.221 | 0.183 | N | 0.57 | SignalP-noTM |  |
| gj_188522640_gb_ACD605851_ | 0.146 | 54 | 0.221 | 11 | 0.653 | 1  | 0.472 | 0.339 | N | 0.57 | SignalP-noTM |  |
| gj_188522641_gb_ACD605861_ | 0.232 | 19 | 0.218 | 19 | 0.386 | 18 | 0.205 | 0.212 | N | 0.57 | SignalP-noTM |  |
| gj_188522643_gb_ACD605881_ | 0.15  | 64 | 0.127 | 64 | 0.152 | 59 | 0.084 | 0.111 | N | 0.51 | SignalP-TM   |  |
| gj_188522649_gb_ACD605941_ | 0.185 | 20 | 0.101 | 20 | 0.129 | 62 | 0.053 | 0.083 | N | 0.51 | SignalP-TM   |  |
| gj_188522650_gb_ACD605951_ | 0.106 | 48 | 0.137 | 14 | 0.269 | 6  | 0.186 | 0.16  | N | 0.57 | SignalP-noTM |  |
| gj_188522652_gb_ACD605971_ | 0.126 | 53 | 0.197 | 11 | 0.608 | 2  | 0.396 | 0.291 | N | 0.57 | SignalP-noTM |  |
| gj_188522653_gb_ACD605981_ | 0.137 | 31 | 0.105 | 31 | 0.109 | 61 | 0.07  | 0.089 | N | 0.57 | SignalP-noTM |  |
| gj_188522654_gb_ACD605991_ | 0.105 | 48 | 0.104 | 48 | 0.139 | 6  | 0.103 | 0.103 | N | 0.57 | SignalP-noTM |  |
| gj_188522655_gb_ACD606001_ | 0.129 | 21 | 0.167 | 11 | 0.385 | 1  | 0.278 | 0.208 | N | 0.51 | SignalP-TM   |  |
| gj_188522661_gb_ACD606061_ | 0.108 | 41 | 0.188 | 17 | 0.518 | 13 | 0.352 | 0.265 | N | 0.57 | SignalP-noTM |  |
| gj_188522665_gb_ACD606101_ | 0.265 | 36 | 0.173 | 13 | 0.214 | 1  | 0.157 | 0.166 | N | 0.57 | SignalP-noTM |  |
| gj_188522666_gb_ACD606111_ | 0.226 | 33 | 0.161 | 33 | 0.272 | 4  | 0.158 | 0.16  | N | 0.57 | SignalP-noTM |  |
| gj_188522667_gb_ACD606121_ | 0.38  | 25 | 0.613 | 25 | 0.996 | 21 | 0.973 | 0.782 | Y | 0.57 | SignalP-noTM |  |
| gj_188522668_gb_ACD606131_ | 0.154 | 35 | 0.124 | 26 | 0.17  | 31 | 0.116 | 0.121 | N | 0.51 | SignalP-TM   |  |
| gj_188522669_gb_ACD606141_ | 0.14  | 35 | 0.132 | 35 | 0.182 | 34 | 0.102 | 0.118 | N | 0.57 | SignalP-noTM |  |
| gj_188522682_gb_ACD606271_ | 0.79  | 20 | 0.827 | 20 | 0.925 | 17 | 0.862 | 0.843 | Y | 0.57 | SignalP-noTM |  |
| gj_188522683_gb_ACD606281_ | 0.257 | 12 | 0.382 | 12 | 0.766 | 9  | 0.574 | 0.472 | N | 0.57 | SignalP-noTM |  |
| gj_188522685_gb_ACD606301_ | 0.107 | 58 | 0.097 | 25 | 0.102 | 13 | 0.082 | 0.09  | N | 0.57 | SignalP-noTM |  |
| gj_188522686_gb_ACD606311_ | 0.581 | 49 | 0.264 | 49 | 0.497 | 1  | 0.181 | 0.233 | N | 0.51 | SignalP-TM   |  |
| gj_188522696_gb_ACD606411_ | 0.204 | 42 | 0.201 | 42 | 0.299 | 41 | 0.174 | 0.188 | N | 0.57 | SignalP-noTM |  |
| gj_188522697_gb_ACD606421_ | 0.114 | 6  | 0.116 | 30 | 0.168 | 19 | 0.114 | 0.115 | N | 0.57 | SignalP-noTM |  |
| gj_188522703_gb_ACD606481_ | 0.284 | 26 | 0.193 | 26 | 0.321 | 8  | 0.181 | 0.189 | N | 0.51 | SignalP-TM   |  |
| gj_188522704_gb_ACD606491_ | 0.119 | 60 | 0.107 | 60 | 0.115 | 40 | 0.077 | 0.093 | N | 0.57 | SignalP-noTM |  |
| gj_188522715_gb_ACD606601_ | 0.122 | 28 | 0.141 | 12 | 0.235 | 4  | 0.201 | 0.169 | N | 0.57 | SignalP-noTM |  |
| gj_188522716_gb_ACD606611_ | 0.225 | 26 | 0.204 | 26 | 0.337 | 11 | 0.217 | 0.209 | N | 0.51 | SignalP-TM   |  |
| gj_188522717_gb_ACD606621_ | 0.174 | 60 | 0.138 | 31 | 0.23  | 29 | 0.125 | 0.132 | N | 0.57 | SignalP-noTM |  |
| gj_188522718_gb_ACD606631_ | 0.136 | 32 | 0.141 | 11 | 0.285 | 2  | 0.198 | 0.168 | N | 0.57 | SignalP-noTM |  |
| gj_188522719_gb_ACD606641_ | 0.159 | 36 | 0.158 | 36 | 0.255 | 32 | 0.122 | 0.141 | N | 0.57 | SignalP-noTM |  |
| gj_188522720_gb_ACD606651_ | 0.143 | 49 | 0.146 | 11 | 0.286 | 1  | 0.206 | 0.174 | N | 0.57 | SignalP-noTM |  |
| gj_188522721_gb_ACD606661_ | 0.239 | 35 | 0.321 | 35 | 0.786 | 14 | 0.545 | 0.426 | N | 0.57 | SignalP-noTM |  |
| gj_188522722_gb_ACD606671_ | 0.13  | 53 | 0.102 | 53 | 0.146 | 5  | 0.081 | 0.092 | N | 0.57 | SignalP-noTM |  |
| gj_188522723_gb_ACD606681_ | 0.111 | 37 | 0.109 | 37 | 0.113 | 31 | 0.094 | 0.102 | N | 0.57 | SignalP-noTM |  |
| gj_188522726_gb_ACD606711_ | 0.146 | 31 | 0.165 | 21 | 0.359 | 15 | 0.249 | 0.204 | N | 0.57 | SignalP-noTM |  |
| gj_188522727_gb_ACD606721_ | 0.156 | 23 | 0.137 | 50 | 0.244 | 46 | 0.118 | 0.128 | N | 0.57 | SignalP-noTM |  |
| gj_188522728_gb_ACD606731_ | 0.158 | 39 | 0.221 | 39 | 0.46  | 31 | 0.276 | 0.247 | N | 0.57 | SignalP-noTM |  |
| gj_188522729_gb_ACD606741_ | 0.101 | 27 | 0.117 | 11 | 0.211 | 3  | 0.129 | 0.122 | N | 0.57 | SignalP-noTM |  |
| gj_188522730_gb_ACD606751_ | 0.112 | 32 | 0.102 | 32 | 0.112 | 53 | 0.076 | 0.09  | N | 0.57 | SignalP-noTM |  |
| gj_188522731_gb_ACD606761_ | 0.301 | 23 | 0.249 | 23 | 0.447 | 12 | 0.216 | 0.233 | N | 0.57 | SignalP-noTM |  |
| gj_188522732_gb_ACD606771_ | 0.22  | 27 | 0.194 | 27 | 0.403 | 22 | 0.14  | 0.169 | N | 0.57 | SignalP-noTM |  |
| gj_188522734_gb_ACD606791_ | 0.137 | 47 | 0.158 | 47 | 0.339 | 37 | 0.167 | 0.162 | N | 0.57 | SignalP-noTM |  |
| gj_188522735_gb_ACD606801_ | 0.102 | 36 | 0.106 | 32 | 0.156 | 1  | 0.109 | 0.107 | N | 0.57 | SignalP-noTM |  |
| gj_188522736_gb_ACD606811_ | 0.332 | 33 | 0.192 | 33 | 0.185 | 32 | 0.095 | 0.147 | N | 0.57 | SignalP-noTM |  |
| gj_188522739_gb_ACD606841_ | 0.131 | 22 | 0.161 | 11 | 0.428 | 1  | 0.234 | 0.195 | N | 0.57 | SignalP-noTM |  |
| gj_188522742_gb_ACD606871_ | 0.521 | 22 | 0.693 | 22 | 0.971 | 11 | 0.933 | 0.806 | Y | 0.57 | SignalP-noTM |  |
| gj_188522743_gb_ACD606881_ | 0.139 | 27 | 0.236 | 27 | 0.57  | 23 | 0.356 | 0.28  | N | 0.51 | SignalP-TM   |  |
| gj_188522744_gb_ACD606891_ | 0.16  | 39 | 0.139 | 39 | 0.178 | 18 | 0.138 | 0.139 | N | 0.51 | SignalP-TM   |  |
| gj_188522745_gb_ACD606901_ | 0.658 | 26 | 0.796 | 26 | 0.99  | 14 | 0.96  | 0.873 | Y | 0.57 | SignalP-noTM |  |
| gj_188522747_gb_ACD606921_ | 0.114 | 40 | 0.136 | 11 | 0.237 | 7  | 0.199 | 0.166 | N | 0.57 | SignalP-noTM |  |
| gj_188522748_gb_ACD606931_ | 0.585 | 20 | 0.747 | 20 | 0.967 | 10 | 0.951 | 0.843 | Y | 0.57 | SignalP-noTM |  |
| gj_188522753_gb_ACD606981_ | 0.887 | 26 | 0.867 | 26 | 0.952 | 25 | 0.796 | 0.834 | Y | 0.57 | SignalP-noTM |  |
| gj_188522754_gb_ACD606991_ | 0.152 | 37 | 0.107 | 37 | 0.139 | 21 | 0.077 | 0.096 | N | 0.51 | SignalP-TM   |  |
| gj_188522755_gb_ACD607001_ | 0.137 | 21 | 0.199 | 21 | 0.484 | 1  | 0.32  | 0.256 | N | 0.57 | SignalP-noTM |  |
| gj_188522756_gb_ACD607011_ | 0.158 | 36 | 0.142 | 36 | 0.224 | 6  | 0.146 | 0.144 | N | 0.57 | SignalP-noTM |  |
| gj_188522758_gb_ACD607031_ | 0.769 | 28 | 0.854 | 28 | 0.98  | 20 | 0.946 | 0.898 | Y | 0.57 | SignalP-noTM |  |
| gj_188522759_gb_ACD607041_ | 0.139 | 17 | 0.184 | 11 | 0.513 | 1  | 0.318 | 0.247 | N | 0.57 | SignalP-noTM |  |

|          |          |          |          |                            |
|----------|----------|----------|----------|----------------------------|
| 0.952844 | 0.998579 | 0.917284 | 0.956236 | gj_188522587_gb_ACD605321_ |
| 0.171505 | 0.454377 | 0.1603   | 0.262061 | gj_188522589_gb_ACD605341_ |
| 0.187856 | 0.042533 | 0.260379 | 0.163589 | gj_188522590_gb_ACD605351_ |
| 0.43807  | 0.97114  | 0.660607 | 0.689939 | gj_188522594_gb_ACD605391_ |
| 0.119098 | 0.060711 | 0.135053 | 0.104954 | gj_188522607_gb_ACD605521_ |
| 0.090298 | 0.040855 | 0.122282 | 0.084478 | gj_188522608_gb_ACD605531_ |
| 0.096914 | 0.118157 | 0.090545 | 0.101872 | gj_188522609_gb_ACD605541_ |
| 0.12196  | 0.085489 | 0.134354 | 0.113934 | gj_188522610_gb_ACD605551_ |
| 0.798991 | 0.38367  | 0.741351 | 0.641337 | gj_188522613_gb_ACD605581_ |
| 0.29713  | 0.950499 | 0.427025 | 0.558218 | gj_188522614_gb_ACD605591_ |
| 0.675902 | 0.044916 | 0.635295 | 0.452038 | gj_188522616_gb_ACD605611_ |
| 0.375194 | 0.13717  | 0.408058 | 0.306807 | gj_188522617_gb_ACD605621_ |
| 0.40444  | 0.416781 | 0.38438  | 0.401867 | gj_188522621_gb_ACD605661_ |
| 0.3028   | 0.09104  | 0.31432  | 0.236053 | gj_188522625_gb_ACD605701_ |
| 0.291523 | 0.081361 | 0.245641 | 0.206175 | gj_528897494_gb_ACD605652_ |
| 0.204403 | 0.331369 | 0.087864 | 0.207879 | gj_188522630_gb_ACD605751_ |
| 0.111452 | 0.033764 | 0.173217 | 0.106144 | gj_188522633_gb_ACD605781_ |
| 0.238486 | 0.969763 | 0.11385  | 0.4407   | gj_188522634_gb_ACD605791_ |
| 0.63599  | 0.982155 | 0.825058 | 0.814401 | gj_188522635_gb_ACD605801_ |
| 0.93946  | 0.999916 | 0.820686 | 0.920021 | gj_188522640_gb_ACD605851_ |
| 0.174942 | 0.125209 | 0.179756 | 0.159969 | gj_188522641_gb_ACD605861_ |
| 0.114153 | 0.035985 | 0.152    | 0.100713 | gj_188522643_gb_ACD605881_ |
| 0.139674 | 0.047156 | 0.181532 | 0.122787 | gj_188522649_gb_ACD605941_ |
| 0.104518 | 0.092541 | 0.136108 | 0.111056 | gj_188522650_gb_ACD605951_ |
| 0.141122 | 0.228818 | 0.113247 | 0.161062 | gj_188522652_gb_ACD605971_ |
| 0.092289 | 0.075299 | 0.090052 | 0.085858 | gj_188522653_gb_ACD605981_ |
| 0.102569 | 0.042901 | 0.114457 | 0.086642 | gj_188522654_gb_ACD605991_ |
| 0.163967 | 0.092541 | 0.154727 | 0.137078 | gj_188522655_gb_ACD606001_ |
|          |          |          |          |                            |

|                            |       |    |       |    |       |    |       |       |   |      |              |  |
|----------------------------|-------|----|-------|----|-------|----|-------|-------|---|------|--------------|--|
| gj_188522763_gb_ACD60708_1 | 0.102 | 36 | 0.115 | 36 | 0.184 | 1  | 0.113 | 0.114 | N | 0.57 | SignalP-noTM |  |
| gj_188522764_gb_ACD60709_1 | 0.157 | 27 | 0.144 | 27 | 0.254 | 2  | 0.154 | 0.149 | N | 0.57 | SignalP-noTM |  |
| gj_188522765_gb_ACD60710_1 | 0.112 | 29 | 0.186 | 11 | 0.406 | 8  | 0.363 | 0.269 | N | 0.57 | SignalP-noTM |  |
| gj_188522767_gb_ACD60712_1 | 0.232 | 58 | 0.121 | 32 | 0.183 | 6  | 0.135 | 0.128 | N | 0.57 | SignalP-noTM |  |
| gj_188522770_gb_ACD60715_1 | 0.138 | 31 | 0.263 | 31 | 0.447 | 10 | 0.292 | 0.277 | N | 0.57 | SignalP-noTM |  |
| gj_188522771_gb_ACD60716_1 | 0.117 | 52 | 0.103 | 52 | 0.112 | 5  | 0.094 | 0.099 | N | 0.57 | SignalP-noTM |  |
| gj_188522772_gb_ACD60717_1 | 0.132 | 32 | 0.245 | 15 | 0.708 | 12 | 0.578 | 0.402 | N | 0.57 | SignalP-noTM |  |
| gj_188522773_gb_ACD60718_1 | 0.809 | 26 | 0.812 | 26 | 0.918 | 19 | 0.834 | 0.823 | Y | 0.57 | SignalP-noTM |  |
| gj_188522780_gb_ACD60725_1 | 0.144 | 58 | 0.135 | 43 | 0.289 | 41 | 0.138 | 0.137 | N | 0.57 | SignalP-noTM |  |
| gj_188522781_gb_ACD60726_1 | 0.116 | 58 | 0.122 | 11 | 0.212 | 3  | 0.15  | 0.133 | N | 0.51 | SignalP-TM   |  |
| gj_188522782_gb_ACD60727_1 | 0.425 | 28 | 0.342 | 22 | 0.556 | 13 | 0.369 | 0.352 | N | 0.51 | SignalP-TM   |  |
| gj_188522783_gb_ACD60728_1 | 0.143 | 31 | 0.174 | 17 | 0.367 | 5  | 0.26  | 0.214 | N | 0.57 | SignalP-noTM |  |
| gj_188522788_gb_ACD60733_1 | 0.103 | 34 | 0.099 | 40 | 0.123 | 3  | 0.094 | 0.097 | N | 0.57 | SignalP-noTM |  |
| gj_188522917_gb_ACD60862_1 | 0.121 | 36 | 0.128 | 20 | 0.204 | 19 | 0.138 | 0.133 | N | 0.57 | SignalP-noTM |  |
| gj_188522918_gb_ACD60863_1 | 0.428 | 17 | 0.633 | 17 | 0.974 | 12 | 0.928 | 0.772 | Y | 0.57 | SignalP-noTM |  |
| gj_188522921_gb_ACD60866_1 | 0.133 | 51 | 0.145 | 23 | 0.262 | 4  | 0.2   | 0.171 | N | 0.57 | SignalP-noTM |  |
| gj_188522929_gb_ACD60874_1 | 0.237 | 23 | 0.237 | 23 | 0.352 | 22 | 0.263 | 0.249 | N | 0.57 | SignalP-noTM |  |
| gj_188522930_gb_ACD60875_1 | 0.112 | 19 | 0.154 | 19 | 0.284 | 1  | 0.204 | 0.178 | N | 0.57 | SignalP-noTM |  |
| gj_188522935_gb_ACD60880_1 | 0.103 | 52 | 0.108 | 59 | 0.128 | 30 | 0.1   | 0.104 | N | 0.57 | SignalP-noTM |  |
| gj_188522936_gb_ACD60881_1 | 0.13  | 30 | 0.128 | 11 | 0.276 | 1  | 0.144 | 0.135 | N | 0.57 | SignalP-noTM |  |
| gj_188522942_gb_ACD60887_1 | 0.257 | 23 | 0.17  | 23 | 0.178 | 20 | 0.121 | 0.147 | N | 0.57 | SignalP-noTM |  |
| gj_188522943_gb_ACD60888_1 | 0.123 | 63 | 0.137 | 11 | 0.271 | 5  | 0.188 | 0.161 | N | 0.57 | SignalP-noTM |  |
| gj_188522944_gb_ACD60889_1 | 0.107 | 22 | 0.224 | 14 | 0.598 | 10 | 0.5   | 0.354 | N | 0.57 | SignalP-noTM |  |
| gj_188522945_gb_ACD60890_1 | 0.181 | 27 | 0.147 | 27 | 0.161 | 25 | 0.17  | 0.133 | N | 0.57 | SignalP-noTM |  |
| gj_188522946_gb_ACD60891_1 | 0.131 | 66 | 0.113 | 66 | 0.15  | 1  | 0.099 | 0.106 | N | 0.57 | SignalP-noTM |  |
| gj_188522947_gb_ACD60892_1 | 0.125 | 17 | 0.159 | 17 | 0.306 | 2  | 0.222 | 0.182 | N | 0.51 | SignalP-TM   |  |
| gj_188522952_gb_ACD60897_1 | 0.336 | 23 | 0.436 | 23 | 0.813 | 12 | 0.645 | 0.534 | N | 0.57 | SignalP-noTM |  |
| gj_188522954_gb_ACD60899_1 | 0.164 | 42 | 0.144 | 42 | 0.211 | 19 | 0.141 | 0.143 | N | 0.57 | SignalP-noTM |  |
| gj_188522957_gb_ACD60902_1 | 0.168 | 43 | 0.214 | 43 | 0.357 | 35 | 0.196 | 0.206 | N | 0.57 | SignalP-noTM |  |
| gj_188522958_gb_ACD60903_1 | 0.137 | 44 | 0.12  | 44 | 0.128 | 16 | 0.101 | 0.111 | N | 0.57 | SignalP-noTM |  |
| gj_188522959_gb_ACD60904_1 | 0.161 | 26 | 0.133 | 26 | 0.125 | 15 | 0.097 | 0.116 | N | 0.57 | SignalP-noTM |  |
| gj_188522961_gb_ACD60906_1 | 0.18  | 21 | 0.219 | 21 | 0.442 | 1  | 0.295 | 0.255 | N | 0.57 | SignalP-noTM |  |
| gj_188522967_gb_ACD60912_1 | 0.11  | 27 | 0.111 | 37 | 0.148 | 5  | 0.105 | 0.109 | N | 0.51 | SignalP-TM   |  |
| gj_188522968_gb_ACD60913_1 | 0.195 | 26 | 0.174 | 26 | 0.333 | 43 | 0.163 | 0.169 | N | 0.57 | SignalP-noTM |  |
| gj_188522977_gb_ACD60922_1 | 0.173 | 51 | 0.171 | 51 | 0.262 | 42 | 0.135 | 0.154 | N | 0.57 | SignalP-noTM |  |
| gj_188522978_gb_ACD60923_1 | 0.165 | 53 | 0.129 | 11 | 0.217 | 1  | 0.163 | 0.145 | N | 0.57 | SignalP-noTM |  |
| gj_188522993_gb_ACD60938_1 | 0.11  | 44 | 0.16  | 32 | 0.369 | 24 | 0.224 | 0.19  | N | 0.57 | SignalP-noTM |  |
| gj_188522994_gb_ACD60939_1 | 0.106 | 9  | 0.103 | 45 | 0.117 | 30 | 0.097 | 0.1   | N | 0.57 | SignalP-noTM |  |
| gj_188522996_gb_ACD60941_1 | 0.397 | 40 | 0.37  | 40 | 0.555 | 27 | 0.312 | 0.343 | N | 0.57 | SignalP-noTM |  |
| gj_188522998_gb_ACD60943_1 | 0.101 | 26 | 0.142 | 12 | 0.274 | 1  | 0.196 | 0.167 | N | 0.57 | SignalP-noTM |  |
| gj_188523004_gb_ACD60949_1 | 0.139 | 15 | 0.14  | 42 | 0.188 | 34 | 0.118 | 0.13  | N | 0.57 | SignalP-noTM |  |
| gj_188523018_gb_ACD60963_1 | 0.114 | 15 | 0.176 | 15 | 0.377 | 8  | 0.273 | 0.222 | N | 0.57 | SignalP-noTM |  |
| gj_188523020_gb_ACD60965_1 | 0.119 | 60 | 0.109 | 60 | 0.114 | 47 | 0.089 | 0.099 | N | 0.57 | SignalP-noTM |  |
| gj_188523021_gb_ACD60966_1 | 0.112 | 31 | 0.124 | 12 | 0.208 | 3  | 0.157 | 0.139 | N | 0.57 | SignalP-noTM |  |
| gj_188523022_gb_ACD60967_1 | 0.117 | 8  | 0.114 | 53 | 0.164 | 50 | 0.104 | 0.109 | N | 0.57 | SignalP-noTM |  |
| gj_188523023_gb_ACD60968_1 | 0.118 | 24 | 0.125 | 24 | 0.155 | 22 | 0.123 | 0.124 | N | 0.57 | SignalP-noTM |  |
| gj_188523024_gb_ACD60969_1 | 0.135 | 33 | 0.127 | 33 | 0.14  | 31 | 0.084 | 0.107 | N | 0.57 | SignalP-noTM |  |
| gj_188523025_gb_ACD60970_1 | 0.12  | 59 | 0.118 | 11 | 0.206 | 1  | 0.136 | 0.127 | N | 0.57 | SignalP-noTM |  |
| gj_188523026_gb_ACD60971_1 | 0.105 | 16 | 0.124 | 16 | 0.172 | 7  | 0.136 | 0.129 | N | 0.57 | SignalP-noTM |  |
| gj_188523030_gb_ACD60975_1 | 0.133 | 56 | 0.14  | 56 | 0.197 | 52 | 0.106 | 0.124 | N | 0.57 | SignalP-noTM |  |
| gj_188523031_gb_ACD60976_1 | 0.203 | 11 | 0.197 | 11 | 0.415 | 10 | 0.204 | 0.2   | N | 0.57 | SignalP-noTM |  |
| gj_188523032_gb_ACD60977_1 | 0.109 | 21 | 0.107 | 11 | 0.165 | 3  | 0.112 | 0.109 | N | 0.51 | SignalP-TM   |  |
| gj_188523033_gb_ACD60978_1 | 0.103 | 24 | 0.107 | 58 | 0.132 | 50 | 0.097 | 0.103 | N | 0.57 | SignalP-noTM |  |
| gj_188523045_gb_ACD60990_1 | 0.153 | 49 | 0.126 | 49 | 0.132 | 31 | 0.094 | 0.111 | N | 0.57 | SignalP-noTM |  |
| gj_188523049_gb_ACD60994_1 | 0.18  | 34 | 0.298 | 34 | 0.718 | 18 | 0.491 | 0.389 | N | 0.57 | SignalP-noTM |  |
| gj_188523052_gb_ACD60997_1 | 0.113 | 62 | 0.115 | 62 | 0.111 | 47 | 0.086 | 0.102 | N | 0.57 | SignalP-noTM |  |
| gj_188523056_gb_ACD61001_1 | 0.166 | 18 | 0.184 | 18 | 0.328 | 9  | 0.22  | 0.197 | N | 0.51 | SignalP-TM   |  |
| gj_188523060_gb_ACD61005_1 | 0.322 | 37 | 0.215 | 37 | 0.252 | 6  | 0.158 | 0.188 | N | 0.57 | SignalP-noTM |  |
| gj_188523061_gb_ACD61006_1 | 0.278 | 23 | 0.386 | 23 | 0.727 | 18 | 0.458 | 0.413 | N | 0.51 | SignalP-TM   |  |
| gj_188523062_gb_ACD61007_1 | 0.131 | 49 | 0.132 | 12 | 0.202 | 1  | 0.174 | 0.152 | N | 0.57 | SignalP-noTM |  |
| gj_188523063_gb_ACD61008_1 | 0.125 | 20 | 0.112 | 38 | 0.165 | 32 | 0.112 | 0.112 | N | 0.57 | SignalP-noTM |  |
| gj_188523064_gb_ACD61009_1 | 0.115 | 19 | 0.152 | 19 | 0.356 | 18 | 0.207 | 0.178 | N | 0.57 | SignalP-noTM |  |
| gj_188523065_gb_ACD61010_1 | 0.103 | 18 | 0.111 | 11 | 0.152 | 1  | 0.123 | 0.116 | N | 0.57 | SignalP-noTM |  |
| gj_188523066_gb_ACD61011_1 | 0.112 | 27 | 0.131 | 11 | 0.224 | 5  | 0.183 | 0.15  | N | 0.51 | SignalP-TM   |  |
| gj_188523067_gb_ACD61012_1 | 0.161 | 35 | 0.141 | 35 | 0.333 | 34 | 0.108 | 0.126 | N | 0.57 | SignalP-noTM |  |
| gj_188523068_gb_ACD61013_1 | 0.133 | 22 | 0.159 | 22 | 0.295 | 11 | 0.196 | 0.176 | N | 0.57 | SignalP-noTM |  |
| gj_188523070_gb_ACD61015_1 | 0.133 | 22 | 0.157 | 22 | 0.289 | 11 | 0.192 | 0.173 | N | 0.57 | SignalP-noTM |  |
| gj_188523071_gb_ACD61016_1 | 0.133 | 31 | 0.184 | 31 | 0.361 | 29 | 0.186 | 0.185 | N | 0.57 | SignalP-noTM |  |
| gj_188523073_gb_ACD61018_1 | 0.124 | 20 | 0.163 | 20 | 0.41  | 1  | 0.223 | 0.191 | N | 0.57 | SignalP-noTM |  |
| gj_188523081_gb_ACD61026_1 | 0.712 | 21 | 0.775 | 21 | 0.948 | 16 | 0.869 | 0.819 | Y | 0.57 | SignalP-noTM |  |
| gj_188523082_gb_ACD61027_1 | 0.165 | 19 | 0.12  | 19 | 0.159 | 35 | 0.081 | 0.102 | N | 0.57 | SignalP-noTM |  |
| gj_188523083_gb_ACD61028_1 | 0.134 | 21 | 0.135 | 11 | 0.313 | 1  | 0.173 | 0.153 | N | 0.57 | SignalP-noTM |  |
| gj_188523085_gb_ACD61030_1 | 0.125 | 35 | 0.144 | 35 | 0.408 | 34 | 0.157 | 0.15  | N | 0.57 | SignalP-noTM |  |
| gj_188523086_gb_ACD61031_1 | 0.115 | 27 | 0.104 | 27 | 0.102 | 21 | 0.08  | 0.093 | N | 0.57 | SignalP-noTM |  |
| gj_188523087_gb_ACD61032_1 | 0.111 | 41 | 0.107 | 41 | 0.134 | 39 | 0.078 | 0.094 | N | 0.57 | SignalP-noTM |  |
| gj_188523088_gb_ACD61033_1 | 0.153 | 29 | 0.153 | 29 | 0.348 | 28 | 0.142 | 0.149 | N | 0.51 | SignalP-TM   |  |
| gj_188523089_gb_ACD61034_1 | 0.193 | 23 | 0.411 | 23 | 0.929 | 2  | 0.888 | 0.636 | Y | 0.57 | SignalP-noTM |  |
| gj_188523091_gb_ACD61036_1 | 0.129 | 37 | 0.11  | 37 | 0.11  | 26 | 0.077 | 0.095 | N | 0.57 | SignalP-noTM |  |

|          |          |          |          |                            |
|----------|----------|----------|----------|----------------------------|
| 0.130562 | 0.34517  | 0.112946 | 0.129559 | gj_188522763_gb_ACD60708_1 |
| 0.19201  | 0.091289 | 0.227761 | 0.170353 | gj_188522764_gb_ACD60709_1 |
| 0.580299 | 0.450661 | 0.673927 | 0.568296 | gj_188522765_gb_ACD60710_1 |
| 0.234154 | 0.021924 | 0.282925 | 0.179668 | gj_188522767_gb_ACD60712_1 |
| 0.245641 | 0.461824 | 0.372385 | 0.35995  | gj_188522770_gb_ACD60715_1 |
| 0.104799 | 0.03299  | 0.111749 | 0.083179 | gj_188522771_gb_ACD60716_1 |
| 0.168034 | 0.271505 | 0.099302 | 0.178947 | gj_188522772_gb_ACD60717_1 |
| 0.826783 | 0.889731 | 0.774867 | 0.83046  | gj_188522773_gb_ACD60718_1 |
| 0.090545 | 0.044532 | 0.147418 | 0.094165 | gj_188522780_gb_ACD60725_1 |
| 0.166034 | 0.420432 | 0.083862 | 0.223443 | gj_188522781_gb_ACD60726_1 |
| 0.234154 | 0.858514 | 0.17581  | 0.422826 | gj_188522782_gb_ACD60727_1 |
| 0.918415 | 0.999993 | 0.78968  | 0.902696 | gj_188522783_gb_ACD60728_1 |
| 0.090298 | 0.000831 | 0.213325 | 0.101485 | gj_188522788_gb_ACD60733_1 |
| 0.270912 | 0.655205 | 0.316263 | 0.414127 | gj_188522917_gb_ACD60862_1 |
| 0.946698 | 0.999851 | 0.904391 | 0.950313 | gj_188522918_gb_ACD60863_1 |
| 0.235232 | 0.118784 | 0.155119 | 0.169712 | gj_188522921_gb_ACD60866_1 |
| 0.676558 | 0.390074 | 0.630416 | 0.565683 | gj_188522929_gb_ACD60874_1 |
| 0.467048 | 0.706615 | 0.651809 | 0.608491 | gj_188522930_gb_ACD60875_1 |
| 0.091538 | 0.09104  | 0.107072 | 0.09655  | gj_188522935_gb_ACD60880_1 |
| 0.077629 | 0.043273 | 0.112047 | 0.07765  | gj_188522936_gb_ACD60881_1 |
| 0.182426 | 0.026211 | 0.236313 | 0.148317 | gj_188522942_gb_ACD60887_1 |
| 0.12196  | 0.023939 | 0.162329 | 0.102743 | gj_188522943_gb_ACD60888_1 |
| 0.182426 | 0.210818 | 0.092793 | 0.162012 | gj_188522944_gb_ACD60889_1 |
| 0.157892 | 0.261536 | 0.151614 | 0.190347 | gj_188522945_gb_ACD60890_1 |
| 0.105364 | 0.037363 | 0.130903 | 0.09121  | gj_188522946_gb_ACD60891_1 |
| 0.233617 | 0.041447 | 0.161109 | 0.145391 | gj_188522947_gb_ACD60892_1 |
| 0.134703 | 0.125868 | 0.184222 | 0.148264 | gj_188522952_gb_ACD60897_1 |
| 0.318863 | 0.840506 | 0.396517 | 0.518629 | gj_188522954_gb_ACD60899_1 |
| 0.198234 | 0.002941 | 0.281709 | 0.162095 | gj_188522957_gb_ACD60902_1 |
| 0.074675 | 0.069461 | 0.0      |          |                            |

|                           |       |    |       |    |       |    |       |       |   |      |              |
|---------------------------|-------|----|-------|----|-------|----|-------|-------|---|------|--------------|
| gj_188523092.gb_ACD610371 | 0.11  | 47 | 0.209 | 17 | 0.506 | 7  | 0.425 | 0.311 | N | 0.57 | SignalP-noTM |
| gj_188523095.gb_ACD610401 | 0.148 | 33 | 0.118 | 33 | 0.116 | 21 | 0.092 | 0.106 | N | 0.57 | SignalP-noTM |
| gj_188523096.gb_ACD610411 | 0.311 | 47 | 0.242 | 47 | 0.281 | 42 | 0.131 | 0.19  | N | 0.57 | SignalP-noTM |
| gj_188523101.gb_ACD610461 | 0.103 | 25 | 0.124 | 18 | 0.191 | 7  | 0.147 | 0.135 | N | 0.57 | SignalP-noTM |
| gj_188523102.gb_ACD610471 | 0.227 | 41 | 0.235 | 18 | 0.387 | 11 | 0.295 | 0.263 | N | 0.57 | SignalP-noTM |
| gj_188523103.gb_ACD610481 | 0.116 | 27 | 0.118 | 27 | 0.169 | 22 | 0.126 | 0.121 | N | 0.51 | SignalIP-TM  |
| gj_188523104.gb_ACD610491 | 0.116 | 21 | 0.129 | 41 | 0.216 | 36 | 0.115 | 0.123 | N | 0.57 | SignalP-noTM |
| gj_188523114.gb_ACD610591 | 0.123 | 34 | 0.169 | 18 | 0.366 | 14 | 0.253 | 0.208 | N | 0.57 | SignalP-noTM |
| gj_188523119.gb_ACD610641 | 0.11  | 19 | 0.179 | 11 | 0.502 | 2  | 0.3   | 0.236 | N | 0.57 | SignalP-noTM |
| gj_188523123.gb_ACD610681 | 0.116 | 29 | 0.111 | 16 | 0.139 | 8  | 0.113 | 0.112 | N | 0.57 | SignalP-noTM |
| gj_188523126.gb_ACD610711 | 0.176 | 46 | 0.207 | 18 | 0.467 | 13 | 0.272 | 0.238 | N | 0.57 | SignalP-noTM |
| gj_188523128.gb_ACD610731 | 0.107 | 15 | 0.108 | 11 | 0.146 | 1  | 0.116 | 0.112 | N | 0.57 | SignalP-noTM |
| gj_188523129.gb_ACD610741 | 0.275 | 27 | 0.244 | 27 | 0.35  | 26 | 0.204 | 0.225 | N | 0.57 | SignalP-noTM |
| gj_188523131.gb_ACD610761 | 0.162 | 39 | 0.177 | 56 | 0.369 | 53 | 0.13  | 0.155 | N | 0.57 | SignalP-noTM |
| gj_188523132.gb_ACD610771 | 0.11  | 56 | 0.136 | 11 | 0.305 | 2  | 0.174 | 0.154 | N | 0.57 | SignalP-noTM |
| gj_188523135.gb_ACD610801 | 0.122 | 29 | 0.129 | 11 | 0.21  | 3  | 0.173 | 0.15  | N | 0.57 | SignalP-noTM |
| gj_188523136.gb_ACD610811 | 0.132 | 46 | 0.104 | 33 | 0.108 | 12 | 0.087 | 0.096 | N | 0.57 | SignalP-noTM |
| gj_188523140.gb_ACD610851 | 0.66  | 25 | 0.732 | 25 | 0.934 | 9  | 0.861 | 0.78  | Y | 0.51 | SignalIP-TM  |
| gj_188523141.gb_ACD610861 | 0.211 | 44 | 0.188 | 44 | 0.248 | 31 | 0.146 | 0.172 | N | 0.51 | SignalIP-TM  |
| gj_188523142.gb_ACD610871 | 0.66  | 23 | 0.764 | 23 | 0.947 | 2  | 0.905 | 0.83  | Y | 0.57 | SignalP-noTM |
| gj_188523143.gb_ACD610881 | 0.198 | 26 | 0.153 | 26 | 0.17  | 14 | 0.122 | 0.138 | N | 0.57 | SignalP-noTM |
| gj_188523144.gb_ACD610891 | 0.111 | 5  | 0.139 | 28 | 0.3   | 25 | 0.172 | 0.154 | N | 0.57 | SignalP-noTM |
| gj_188523150.gb_ACD610951 | 0.154 | 16 | 0.219 | 16 | 0.398 | 15 | 0.308 | 0.252 | N | 0.51 | SignalIP-TM  |
| gj_188523151.gb_ACD610961 | 0.137 | 61 | 0.119 | 15 | 0.18  | 6  | 0.139 | 0.128 | N | 0.57 | SignalP-noTM |
| gj_188523155.gb_ACD611001 | 0.155 | 42 | 0.145 | 42 | 0.21  | 19 | 0.138 | 0.141 | N | 0.57 | SignalP-noTM |
| gj_188523157.gb_ACD611021 | 0.164 | 25 | 0.143 | 11 | 0.323 | 2  | 0.194 | 0.167 | N | 0.57 | SignalP-noTM |
| gj_188523159.gb_ACD611041 | 0.208 | 31 | 0.286 | 31 | 0.62  | 16 | 0.395 | 0.326 | N | 0.51 | SignalIP-TM  |
| gj_188523171.gb_ACD611161 | 0.832 | 24 | 0.782 | 24 | 0.901 | 12 | 0.805 | 0.793 | Y | 0.57 | SignalP-noTM |
| gj_188523178.gb_ACD611231 | 0.872 | 24 | 0.895 | 24 | 0.978 | 10 | 0.938 | 0.915 | Y | 0.57 | SignalP-noTM |
| gj_188523184.gb_ACD611291 | 0.11  | 20 | 0.119 | 20 | 0.177 | 1  | 0.124 | 0.122 | N | 0.57 | SignalP-noTM |
| gj_188523185.gb_ACD611301 | 0.116 | 19 | 0.141 | 19 | 0.257 | 1  | 0.171 | 0.155 | N | 0.57 | SignalP-noTM |
| gj_188523186.gb_ACD611311 | 0.23  | 44 | 0.211 | 44 | 0.3   | 33 | 0.165 | 0.189 | N | 0.57 | SignalP-noTM |
| gj_188523187.gb_ACD611321 | 0.152 | 34 | 0.171 | 34 | 0.507 | 31 | 0.167 | 0.169 | N | 0.57 | SignalP-noTM |
| gj_188523188.gb_ACD611331 | 0.175 | 19 | 0.152 | 19 | 0.287 | 27 | 0.136 | 0.144 | N | 0.57 | SignalP-noTM |
| gj_188523192.gb_ACD611371 | 0.116 | 30 | 0.116 | 30 | 0.137 | 21 | 0.096 | 0.107 | N | 0.57 | SignalP-noTM |
| gj_188523198.gb_ACD611431 | 0.339 | 25 | 0.444 | 25 | 0.883 | 17 | 0.691 | 0.56  | N | 0.57 | SignalP-noTM |
| gj_188523201.gb_ACD611461 | 0.103 | 69 | 0.115 | 11 | 0.194 | 4  | 0.137 | 0.125 | N | 0.57 | SignalP-noTM |
| gj_188523203.gb_ACD611481 | 0.105 | 13 | 0.102 | 11 | 0.178 | 2  | 0.102 | 0.102 | N | 0.57 | SignalP-noTM |
| gj_188523204.gb_ACD611491 | 0.194 | 25 | 0.285 | 12 | 0.824 | 7  | 0.768 | 0.512 | N | 0.57 | SignalP-noTM |
| gj_188523205.gb_ACD611501 | 0.12  | 28 | 0.099 | 28 | 0.146 | 1  | 0.08  | 0.092 | N | 0.51 | SignalIP-TM  |
| gj_188523206.gb_ACD611511 | 0.163 | 32 | 0.127 | 32 | 0.121 | 47 | 0.097 | 0.116 | N | 0.51 | SignalIP-TM  |
| gj_188523207.gb_ACD611521 | 0.119 | 46 | 0.193 | 21 | 0.457 | 15 | 0.336 | 0.26  | N | 0.57 | SignalP-noTM |
| gj_188523208.gb_ACD611531 | 0.252 | 33 | 0.145 | 33 | 0.135 | 2  | 0.081 | 0.115 | N | 0.57 | SignalP-noTM |
| gj_188523209.gb_ACD611541 | 0.133 | 24 | 0.103 | 35 | 0.114 | 31 | 0.085 | 0.096 | N | 0.51 | SignalIP-TM  |
| gj_188523212.gb_ACD611571 | 0.332 | 54 | 0.534 | 54 | 0.962 | 50 | 0.425 | 0.483 | N | 0.57 | SignalP-noTM |
| gj_188523213.gb_ACD611581 | 0.207 | 12 | 0.155 | 12 | 0.188 | 10 | 0.117 | 0.137 | N | 0.57 | SignalP-noTM |
| gj_188523215.gb_ACD611601 | 0.118 | 21 | 0.112 | 50 | 0.137 | 46 | 0.09  | 0.102 | N | 0.57 | SignalP-noTM |
| gj_188523222.gb_ACD611671 | 0.634 | 43 | 0.74  | 43 | 0.983 | 26 | 0.681 | 0.712 | Y | 0.57 | SignalP-noTM |
| gj_188523223.gb_ACD611681 | 0.102 | 20 | 0.109 | 11 | 0.179 | 1  | 0.112 | 0.111 | N | 0.57 | SignalP-noTM |
| gj_188523228.gb_ACD611731 | 0.192 | 22 | 0.209 | 22 | 0.328 | 10 | 0.218 | 0.213 | N | 0.57 | SignalP-noTM |
| gj_188523230.gb_ACD611751 | 0.128 | 33 | 0.116 | 33 | 0.142 | 32 | 0.088 | 0.103 | N | 0.57 | SignalP-noTM |
| gj_188523232.gb_ACD611771 | 0.192 | 29 | 0.136 | 29 | 0.158 | 23 | 0.094 | 0.116 | N | 0.57 | SignalP-noTM |
| gj_188523233.gb_ACD611781 | 0.281 | 22 | 0.502 | 22 | 0.933 | 3  | 0.897 | 0.688 | Y | 0.57 | SignalP-noTM |
| gj_188523235.gb_ACD611801 | 0.152 | 32 | 0.147 | 48 | 0.207 | 44 | 0.116 | 0.132 | N | 0.57 | SignalP-noTM |
| gj_188523242.gb_ACD611871 | 0.478 | 24 | 0.636 | 24 | 0.915 | 19 | 0.845 | 0.734 | Y | 0.57 | SignalP-noTM |
| gj_188523244.gb_ACD611891 | 0.115 | 22 | 0.146 | 13 | 0.28  | 9  | 0.215 | 0.178 | N | 0.57 | SignalP-noTM |
| gj_188523249.gb_ACD611941 | 0.121 | 32 | 0.117 | 32 | 0.137 | 23 | 0.096 | 0.107 | N | 0.57 | SignalP-noTM |
| gj_188523252.gb_ACD611971 | 0.101 | 63 | 0.112 | 30 | 0.142 | 20 | 0.103 | 0.108 | N | 0.57 | SignalP-noTM |
| gj_188523253.gb_ACD611981 | 0.18  | 56 | 0.12  | 12 | 0.202 | 1  | 0.141 | 0.128 | N | 0.51 | SignalIP-TM  |
| gj_188523256.gb_ACD612011 | 0.115 | 22 | 0.147 | 13 | 0.284 | 9  | 0.218 | 0.181 | N | 0.57 | SignalP-noTM |
| gj_188523257.gb_ACD612021 | 0.149 | 40 | 0.146 | 40 | 0.248 | 39 | 0.123 | 0.135 | N | 0.57 | SignalP-noTM |
| gj_188523258.gb_ACD612031 | 0.155 | 42 | 0.145 | 42 | 0.21  | 19 | 0.138 | 0.141 | N | 0.57 | SignalP-noTM |
| gj_188523259.gb_ACD612041 | 0.167 | 17 | 0.142 | 17 | 0.177 | 1  | 0.126 | 0.135 | N | 0.57 | SignalP-noTM |
| gj_188523261.gb_ACD612061 | 0.627 | 16 | 0.596 | 16 | 0.733 | 1  | 0.587 | 0.592 | Y | 0.57 | SignalP-noTM |
| gj_188523262.gb_ACD612071 | 0.127 | 28 | 0.176 | 28 | 0.447 | 1  | 0.254 | 0.212 | N | 0.57 | SignalP-noTM |
| gj_188523263.gb_ACD612081 | 0.165 | 42 | 0.13  | 14 | 0.265 | 12 | 0.17  | 0.148 | N | 0.57 | SignalP-noTM |
| gj_188523264.gb_ACD612091 | 0.107 | 58 | 0.144 | 55 | 0.363 | 48 | 0.119 | 0.133 | N | 0.57 | SignalP-noTM |
| gj_188523265.gb_ACD612101 | 0.126 | 61 | 0.123 | 11 | 0.184 | 6  | 0.156 | 0.138 | N | 0.57 | SignalP-noTM |
| gj_188523266.gb_ACD612111 | 0.14  | 46 | 0.141 | 12 | 0.235 | 4  | 0.203 | 0.17  | N | 0.57 | SignalP-noTM |
| gj_188523270.gb_ACD612151 | 0.226 | 26 | 0.177 | 26 | 0.203 | 20 | 0.143 | 0.161 | N | 0.57 | SignalP-noTM |
| gj_188523272.gb_ACD612171 | 0.25  | 35 | 0.176 | 35 | 0.241 | 2  | 0.15  | 0.164 | N | 0.57 | SignalP-noTM |
| gj_188523273.gb_ACD612181 | 0.16  | 26 | 0.147 | 11 | 0.337 | 1  | 0.203 | 0.174 | N | 0.57 | SignalP-noTM |
| gj_188523274.gb_ACD612191 | 0.109 | 70 | 0.107 | 70 | 0.118 | 43 | 0.095 | 0.101 | N | 0.57 | SignalP-noTM |
| gj_188523276.gb_ACD612211 | 0.121 | 18 | 0.152 | 18 | 0.311 | 1  | 0.205 | 0.172 | N | 0.51 | SignalIP-TM  |
| gj_188523277.gb_ACD612221 | 0.156 | 42 | 0.146 | 42 | 0.219 | 19 | 0.143 | 0.145 | N | 0.57 | SignalP-noTM |
| gj_188523283.gb_ACD612281 | 0.441 | 21 | 0.201 | 21 | 0.153 | 20 | 0.075 | 0.142 | N | 0.57 | SignalP-noTM |
| gj_188523284.gb_ACD612291 | 0.127 | 24 | 0.099 | 50 | 0.108 | 33 | 0.085 | 0.092 | N | 0.57 | SignalP-noTM |
| gj_188523285.gb_ACD612301 | 0.12  | 32 | 0.124 | 32 | 0.202 | 14 | 0.126 | 0.125 | N | 0.57 | SignalP-noTM |

|          |          |          |          |                           |
|----------|----------|----------|----------|---------------------------|
| 0.141851 | 0.126198 | 0.113548 | 0.127199 | gj_188523092.gb_ACD610371 |
| 0.102293 | 0.004702 | 0.140035 | 0.082343 | gj_188523095.gb_ACD610401 |
| 0.278081 | 0.005283 | 0.333366 | 0.205577 | gj_188523096.gb_ACD610411 |
| 0.134354 | 0.039015 | 0.182873 | 0.118747 | gj_188523101.gb_ACD610461 |
| 0.3858   | 0.951339 | 0.349554 | 0.562231 | gj_188523102.gb_ACD610471 |
| 0.08181  | 0.52473  | 0.167284 | 0.257941 | gj_188523103.gb_ACD610481 |
| 0.0985   | 0.074261 | 0.10736  | 0.093374 | gj_188523104.gb_ACD610491 |
| 0.157892 | 0.457354 | 0.14295  | 0.252732 | gj_188523114.gb_ACD610591 |
| 0.686566 | 0.959589 | 0.589766 | 0.76074  | gj_188523119.gb_ACD610641 |
| 0.062444 | 0.046486 | 0.109997 | 0.072676 | gj_188523123.gb_ACD610681 |
| 0.163967 | 0.491751 | 0.242872 | 0.29953  | gj_188523126.gb_ACD610711 |
| 0.057216 | 0.019152 | 0.076562 | 0.050977 | gj_188523128.gb_ACD610731 |
| 0.715246 | 0.092289 | 0.736722 | 0.514752 | gj_188523129.gb_ACD610741 |
| 0.159092 | 0.130222 | 0.189694 | 0.198669 | gj_188523131.gb_ACD610761 |
| 0.27508  | 0.806589 | 0.3858   | 0.489156 | gj_188523132.gb_ACD610771 |
| 0.092541 | 0.168962 | 0.069655 | 0.110386 | gj_188523135.gb_ACD610801 |
| 0.147041 | 0.003681 | 0.199567 | 0.116763 | gj_188523136.gb_ACD610811 |
| 0.733216 | 0.998459 | 0.838485 | 0.85672  | gj_188523140.gb_ACD610851 |
| 0.236313 | 0.267959 | 0.304068 | 0.269447 | gj_188523141.gb_ACD610861 |
| 0.17581  | 0.065314 | 0.300903 | 0.180676 | gj_188523142.gb_ACD610871 |
| 0.106786 | 0.103123 | 0.137881 | 0.11593  | gj_188523143.gb_ACD610881 |
| 0.830616 | 0.951061 | 0.764768 | 0.848815 | gj_188523144.gb_ACD610891 |
| 0.52473  | 0.747628 | 0.679832 | 0.65073  | gj_188523150.gb_ACD610951 |
| 0.198134 | 0.161515 | 0.282925 | 0.214191 | gj_188523151.gb_ACD610961 |
| 0.278081 | 0.54711  | 0.336708 | 0.3873   | gj_188523155.gb_ACD611001 |
| 0.071625 | 0.009991 | 0.112645 | 0.064754 | gj_188523157.gb_ACD611021 |
| 0.159092 | 0.200047 | 0.166866 | 0.175335 | gj_188523159.gb_ACD611041 |
| 0.630416 | 0.490251 | 0.568565 | 0.563077 | gj_188523171.gb_ACD611161 |
| 0.9473   | 0.999896 | 0.8935   | 0.946899 | gj_188523178.gb_ACD611231 |
| 0.077201 | 0.001774 | 0.120363 | 0.066446 | gj_188523184.gb_ACD611291 |
| 0.296504 | 0.201974 | 0.20538  | 0.234619 | gj_188523185.gb_ACD611301 |
| 0.402995 | 0.284754 | 0.443246 | 0.376998 | gj_188523186.gb_ACD611311 |
| 0.071226 | 0.006413 | 0.09639  | 0.05801  | gj_188523187.gb_ACD611321 |
| 0.336038 |          |          |          |                           |





|                            |       |    |       |    |       |    |       |       |   |      |              |  |
|----------------------------|-------|----|-------|----|-------|----|-------|-------|---|------|--------------|--|
| gj_188521753_gb_ACD59698.1 | 0.106 | 21 | 0.127 | 11 | 0.242 | 1  | 0.152 | 0.138 | N | 0.57 | SignalP-noTM |  |
| gj_188521756_gb_ACD59701.1 | 0.153 | 51 | 0.132 | 51 | 0.182 | 49 | 0.108 | 0.121 | N | 0.57 | SignalP-noTM |  |
| gj_188521758_gb_ACD59703.1 | 0.125 | 59 | 0.161 | 11 | 0.406 | 2  | 0.261 | 0.208 | N | 0.57 | SignalP-noTM |  |
| gj_188521759_gb_ACD59704.1 | 0.199 | 18 | 0.186 | 18 | 0.223 | 14 | 0.175 | 0.181 | N | 0.51 | SignalP-TM   |  |
| gj_188521763_gb_ACD59708.1 | 0.166 | 9  | 0.132 | 15 | 0.204 | 5  | 0.135 | 0.133 | N | 0.57 | SignalP-noTM |  |
| gj_188521764_gb_ACD59709.1 | 0.122 | 36 | 0.096 | 11 | 0.118 | 32 | 0.096 | 0.096 | N | 0.51 | SignalP-TM   |  |
| gj_188521765_gb_ACD59710.1 | 0.442 | 28 | 0.603 | 28 | 0.994 | 12 | 0.905 | 0.745 | Y | 0.57 | SignalP-noTM |  |
| gj_188521766_gb_ACD59711.1 | 0.128 | 23 | 0.182 | 11 | 0.476 | 4  | 0.345 | 0.242 | N | 0.51 | SignalP-TM   |  |
| gj_188521768_gb_ACD59713.1 | 0.228 | 35 | 0.179 | 35 | 0.404 | 1  | 0.178 | 0.179 | N | 0.57 | SignalP-noTM |  |
| gj_188521772_gb_ACD59717.1 | 0.18  | 22 | 0.185 | 22 | 0.31  | 21 | 0.175 | 0.18  | N | 0.57 | SignalP-noTM |  |
| gj_188521773_gb_ACD59718.1 | 0.108 | 41 | 0.119 | 11 | 0.211 | 1  | 0.135 | 0.126 | N | 0.57 | SignalP-noTM |  |
| gj_188521774_gb_ACD59719.1 | 0.168 | 40 | 0.133 | 40 | 0.158 | 69 | 0.075 | 0.112 | N | 0.51 | SignalP-TM   |  |
| gj_188521775_gb_ACD59720.1 | 0.099 | 11 | 0.12  | 11 | 0.262 | 1  | 0.121 | 0.12  | N | 0.51 | SignalP-TM   |  |
| gj_188521776_gb_ACD59721.1 | 0.111 | 52 | 0.11  | 11 | 0.176 | 2  | 0.122 | 0.116 | N | 0.57 | SignalP-noTM |  |
| gj_188521777_gb_ACD59722.1 | 0.102 | 29 | 0.109 | 29 | 0.15  | 10 | 0.111 | 0.11  | N | 0.57 | SignalP-noTM |  |
| gj_188521779_gb_ACD59724.1 | 0.19  | 20 | 0.331 | 20 | 0.77  | 3  | 0.637 | 0.475 | N | 0.57 | SignalP-noTM |  |
| gj_188521783_gb_ACD59728.1 | 0.129 | 64 | 0.108 | 11 | 0.137 | 1  | 0.117 | 0.112 | N | 0.57 | SignalP-noTM |  |
| gj_188521784_gb_ACD59729.1 | 0.194 | 29 | 0.136 | 29 | 0.189 | 3  | 0.114 | 0.125 | N | 0.57 | SignalP-noTM |  |
| gj_188521785_gb_ACD59730.1 | 0.364 | 32 | 0.495 | 32 | 0.952 | 22 | 0.765 | 0.622 | Y | 0.57 | SignalP-noTM |  |
| gj_188521787_gb_ACD59732.1 | 0.237 | 25 | 0.166 | 25 | 0.245 | 1  | 0.129 | 0.149 | N | 0.57 | SignalP-noTM |  |
| gj_188521788_gb_ACD59733.1 | 0.221 | 32 | 0.243 | 23 | 0.576 | 14 | 0.403 | 0.302 | N | 0.51 | SignalP-TM   |  |
| gj_188521791_gb_ACD59736.1 | 0.218 | 21 | 0.436 | 19 | 0.952 | 11 | 0.902 | 0.655 | Y | 0.57 | SignalP-noTM |  |
| gj_528897484_gb_AGS47850.1 | 0.193 | 44 | 0.224 | 44 | 0.523 | 28 | 0.259 | 0.24  | N | 0.57 | SignalP-noTM |  |
| gj_188521793_gb_ACD59738.1 | 0.103 | 29 | 0.158 | 14 | 0.319 | 13 | 0.255 | 0.204 | N | 0.57 | SignalP-noTM |  |
| gj_188522255_gb_ACD60200.1 | 0.117 | 42 | 0.16  | 11 | 0.291 | 1  | 0.235 | 0.195 | N | 0.57 | SignalP-noTM |  |
| gj_188522257_gb_ACD60202.1 | 0.156 | 42 | 0.146 | 42 | 0.219 | 19 | 0.143 | 0.145 | N | 0.57 | SignalP-noTM |  |
| gj_188522258_gb_ACD60203.1 | 0.11  | 17 | 0.118 | 11 | 0.217 | 1  | 0.129 | 0.123 | N | 0.57 | SignalP-noTM |  |
| gj_188522266_gb_ACD60211.1 | 0.132 | 25 | 0.15  | 25 | 0.233 | 16 | 0.175 | 0.162 | N | 0.57 | SignalP-noTM |  |
| gj_188522268_gb_ACD60213.1 | 0.112 | 45 | 0.108 | 45 | 0.126 | 1  | 0.099 | 0.104 | N | 0.57 | SignalP-noTM |  |
| gj_188522269_gb_ACD60214.1 | 0.109 | 29 | 0.133 | 11 | 0.28  | 1  | 0.166 | 0.148 | N | 0.57 | SignalP-noTM |  |
| gj_188522270_gb_ACD60215.1 | 0.275 | 33 | 0.316 | 33 | 0.649 | 10 | 0.462 | 0.385 | N | 0.57 | SignalP-noTM |  |
| gj_188522272_gb_ACD60217.1 | 0.134 | 34 | 0.134 | 11 | 0.242 | 4  | 0.184 | 0.158 | N | 0.57 | SignalP-noTM |  |
| gj_188522273_gb_ACD60218.1 | 0.11  | 43 | 0.121 | 11 | 0.186 | 6  | 0.153 | 0.136 | N | 0.57 | SignalP-noTM |  |
| gj_188522274_gb_ACD60219.1 | 0.128 | 44 | 0.128 | 44 | 0.169 | 37 | 0.111 | 0.12  | N | 0.57 | SignalP-noTM |  |
| gj_188522275_gb_ACD60220.1 | 0.147 | 33 | 0.116 | 33 | 0.161 | 1  | 0.092 | 0.107 | N | 0.51 | SignalP-TM   |  |
| gj_188522277_gb_ACD60222.1 | 0.285 | 50 | 0.13  | 24 | 0.216 | 14 | 0.148 | 0.137 | N | 0.51 | SignalP-TM   |  |
| gj_188522278_gb_ACD60223.1 | 0.111 | 27 | 0.12  | 11 | 0.194 | 5  | 0.157 | 0.134 | N | 0.51 | SignalP-TM   |  |
| gj_188522281_gb_ACD60226.1 | 0.144 | 36 | 0.12  | 36 | 0.123 | 2  | 0.098 | 0.11  | N | 0.57 | SignalP-noTM |  |
| gj_188522282_gb_ACD60227.1 | 0.122 | 49 | 0.114 | 14 | 0.164 | 11 | 0.133 | 0.121 | N | 0.51 | SignalP-TM   |  |
| gj_188522285_gb_ACD60230.1 | 0.104 | 35 | 0.194 | 18 | 0.502 | 11 | 0.357 | 0.27  | N | 0.57 | SignalP-noTM |  |
| gj_188522286_gb_ACD60231.1 | 0.144 | 35 | 0.233 | 24 | 0.491 | 18 | 0.412 | 0.317 | N | 0.57 | SignalP-noTM |  |
| gj_188522293_gb_ACD60238.1 | 0.131 | 35 | 0.137 | 11 | 0.25  | 3  | 0.184 | 0.159 | N | 0.57 | SignalP-noTM |  |
| gj_188522298_gb_ACD60243.1 | 0.133 | 22 | 0.158 | 22 | 0.292 | 11 | 0.194 | 0.175 | N | 0.57 | SignalP-noTM |  |
| gj_188522301_gb_ACD60246.1 | 0.118 | 54 | 0.104 | 65 | 0.126 | 60 | 0.086 | 0.097 | N | 0.51 | SignalP-TM   |  |
| gj_188522302_gb_ACD60247.1 | 0.118 | 33 | 0.11  | 11 | 0.157 | 2  | 0.121 | 0.115 | N | 0.57 | SignalP-noTM |  |
| gj_188522303_gb_ACD60248.1 | 0.159 | 45 | 0.14  | 11 | 0.289 | 1  | 0.182 | 0.159 | N | 0.57 | SignalP-noTM |  |
| gj_188522307_gb_ACD60252.1 | 0.136 | 42 | 0.121 | 11 | 0.21  | 1  | 0.145 | 0.132 | N | 0.57 | SignalP-noTM |  |
| gj_188522310_gb_ACD60255.1 | 0.195 | 31 | 0.153 | 11 | 0.298 | 1  | 0.226 | 0.188 | N | 0.57 | SignalP-noTM |  |
| gj_188522311_gb_ACD60256.1 | 0.105 | 20 | 0.105 | 30 | 0.127 | 20 | 0.096 | 0.101 | N | 0.57 | SignalP-noTM |  |
| gj_188522312_gb_ACD60257.1 | 0.13  | 40 | 0.107 | 58 | 0.152 | 49 | 0.083 | 0.098 | N | 0.51 | SignalP-TM   |  |
| gj_188522313_gb_ACD60258.1 | 0.125 | 19 | 0.133 | 11 | 0.246 | 2  | 0.171 | 0.151 | N | 0.57 | SignalP-noTM |  |
| gj_188522314_gb_ACD60259.1 | 0.145 | 22 | 0.115 | 22 | 0.117 | 13 | 0.082 | 0.1   | N | 0.57 | SignalP-noTM |  |
| gj_188522321_gb_ACD60266.1 | 0.151 | 60 | 0.224 | 11 | 0.681 | 1  | 0.479 | 0.344 | N | 0.57 | SignalP-noTM |  |
| gj_188522323_gb_ACD60268.1 | 0.118 | 18 | 0.122 | 11 | 0.189 | 6  | 0.154 | 0.137 | N | 0.57 | SignalP-noTM |  |
| gj_188522324_gb_ACD60269.1 | 0.117 | 21 | 0.126 | 11 | 0.227 | 2  | 0.154 | 0.139 | N | 0.57 | SignalP-noTM |  |
| gj_188522325_gb_ACD60270.1 | 0.177 | 30 | 0.135 | 30 | 0.168 | 29 | 0.107 | 0.122 | N | 0.57 | SignalP-noTM |  |
| gj_188522329_gb_ACD60274.1 | 0.116 | 30 | 0.1   | 11 | 0.141 | 1  | 0.097 | 0.099 | N | 0.57 | SignalP-noTM |  |
| gj_188522332_gb_ACD60277.1 | 0.111 | 27 | 0.126 | 11 | 0.21  | 5  | 0.171 | 0.142 | N | 0.51 | SignalP-TM   |  |
| gj_188522335_gb_ACD60280.1 | 0.202 | 26 | 0.16  | 26 | 0.193 | 25 | 0.136 | 0.149 | N | 0.57 | SignalP-noTM |  |
| gj_188522337_gb_ACD60282.1 | 0.118 | 40 | 0.106 | 40 | 0.149 | 2  | 0.096 | 0.101 | N | 0.57 | SignalP-noTM |  |
| gj_188522338_gb_ACD60283.1 | 0.133 | 33 | 0.14  | 33 | 0.276 | 30 | 0.126 | 0.133 | N | 0.57 | SignalP-noTM |  |
| gj_188522341_gb_ACD60286.1 | 0.147 | 25 | 0.225 | 17 | 0.647 | 1  | 0.495 | 0.352 | N | 0.57 | SignalP-noTM |  |
| gj_188522345_gb_ACD60290.1 | 0.129 | 23 | 0.142 | 11 | 0.244 | 1  | 0.197 | 0.168 | N | 0.57 | SignalP-noTM |  |
| gj_188522346_gb_ACD60291.1 | 0.135 | 20 | 0.105 | 20 | 0.115 | 1  | 0.084 | 0.095 | N | 0.57 | SignalP-noTM |  |
| gj_188522350_gb_ACD60295.1 | 0.135 | 44 | 0.11  | 44 | 0.107 | 1  | 0.074 | 0.093 | N | 0.57 | SignalP-noTM |  |
| gj_188522354_gb_ACD60299.1 | 0.114 | 56 | 0.124 | 17 | 0.179 | 11 | 0.152 | 0.137 | N | 0.57 | SignalP-noTM |  |
| gj_188522365_gb_ACD60310.1 | 0.322 | 30 | 0.18  | 30 | 0.122 | 27 | 0.093 | 0.139 | N | 0.57 | SignalP-noTM |  |
| gj_188522366_gb_ACD60311.1 | 0.135 | 44 | 0.136 | 44 | 0.118 | 35 | 0.119 | 0.128 | N | 0.57 | SignalP-noTM |  |
| gj_188522796_gb_ACD60741.1 | 0.121 | 23 | 0.148 | 23 | 0.306 | 19 | 0.182 | 0.164 | N | 0.57 | SignalP-noTM |  |
| gj_188522798_gb_ACD60743.1 | 0.112 | 41 | 0.13  | 41 | 0.192 | 31 | 0.13  | 0.13  | N | 0.57 | SignalP-noTM |  |
| gj_188522805_gb_ACD60750.1 | 0.312 | 23 | 0.425 | 23 | 0.791 | 21 | 0.508 | 0.464 | N | 0.57 | SignalP-noTM |  |
| gj_188522812_gb_ACD60757.1 | 0.126 | 67 | 0.111 | 67 | 0.11  | 45 | 0.085 | 0.099 | N | 0.57 | SignalP-noTM |  |
| gj_188522816_gb_ACD60761.1 | 0.139 | 16 | 0.127 | 16 | 0.254 | 1  | 0.129 | 0.128 | N | 0.57 | SignalP-noTM |  |
| gj_188522817_gb_ACD60762.1 | 0.154 | 31 | 0.326 | 16 | 0.895 | 11 | 0.82  | 0.558 | N | 0.57 | SignalP-noTM |  |
| gj_188522818_gb_ACD60763.1 | 0.268 | 34 | 0.142 | 11 | 0.302 | 1  | 0.185 | 0.163 | N | 0.57 | SignalP-noTM |  |
| gj_188522829_gb_ACD60774.1 | 0.249 | 53 | 0.221 | 53 | 0.306 | 49 | 0.154 | 0.196 | N | 0.51 | SignalP-TM   |  |
| gj_188522831_gb_ACD60776.1 | 0.155 | 42 | 0.145 | 42 | 0.21  | 19 | 0.138 | 0.141 | N | 0.57 | SignalP-noTM |  |
| gj_188522835_gb_ACD60780.1 | 0.158 | 29 | 0.119 | 29 | 0.132 | 5  | 0.091 | 0.106 | N | 0.57 | SignalP-noTM |  |

|          |          |          |          |                            |
|----------|----------|----------|----------|----------------------------|
| 0.919908 | 0.981183 | 0.796571 | 0.897887 | gj_188521753_gb_ACD59698.1 |
| 0.461079 | 0.924492 | 0.558974 | 0.648182 | gj_188521756_gb_ACD59701.1 |
| 0.709096 | 0.033278 | 0.743073 | 0.495149 | gj_188521758_gb_ACD59703.1 |
| 0.109389 | 0.012297 | 0.182873 | 0.10152  | gj_188521759_gb_ACD59704.1 |
| 0.786675 | 0.810306 | 0.745926 | 0.780969 | gj_188521763_gb_ACD59708.1 |
| 0.079585 | 0.044916 | 0.127862 | 0.084121 | gj_188521764_gb_ACD59709.1 |
| 0.948546 | 0.999792 | 0.881843 | 0.942727 | gj_188521765_gb_ACD59710.1 |
| 0.958553 | 0.999863 | 0.850306 | 0.932641 | gj_188521766_gb_ACD59711.1 |
| 0.083862 | 0.047021 | 0.10011  | 0.076998 | gj_188521768_gb_ACD59713.1 |
| 0.940476 | 0.990641 | 0.880902 | 0.93734  | gj_188521772_gb_ACD59717.1 |
| 0.08181  | 0.001334 | 0.105081 | 0.062742 | gj_188521773_gb_ACD59718.1 |
| 0.109097 | 0.07385  | 0.219428 | 0.134125 | gj_188521774_gb_ACD59719.1 |
| 0.254074 | 0.01811  | 0.368188 | 0.213457 | gj_188521775_gb_ACD59720.1 |
| 0.529217 | 0.832298 | 0.65656  | 0.672692 | gj_188521776_gb_ACD59721.1 |
| 0.562669 | 0.928176 | 0.647113 | 0.712853 | gj_188521777_gb_ACD59722.1 |
| 0.701615 | 0.952979 | 0.748193 | 0.800929 | gj_188521779_gb_ACD59724.1 |
| 0.085959 | 0.046887 | 0.139674 | 0.09084  | gj_188521783_gb_ACD59728.1 |
| 0.938255 | 0.996491 | 0.850687 | 0.928478 | gj_188521784_gb_ACD59729.1 |
| 0.940609 | 0.995583 | 0.887355 | 0.945336 | gj_188521785_gb_ACD59730.1 |
| 0.187856 | 0.022379 | 0.24453  | 0.151588 | gj_188521787_gb_ACD59732.1 |
| 0.072024 | 0.076562 | 0.10736  | 0.085315 | gj_188521788_gb_ACD59733.1 |
| 0.913093 | 0.940811 | 0.850687 | 0.90153  | gj_188521791_gb_ACD59736.1 |
| 0.899438 | 0.996574 | 0.718898 | 0.871767 | gj_188521793_gb_ACD59738.1 |
| 0.411686 | 0.545623 | 0.444727 | 0.467345 | gj_188522255_gb_ACD60200.1 |
| 0.266198 | 0.723122 | 0.299643 | 0.429654 | gj_188522257_gb_ACD60202.1 |
| 0.125868 | 0.104238 | 0.269729 | 0.166612 | gj_188522258_gb_ACD60203.1 |
| 0.094833 | 0.053758 | 0.082716 | 0.077102 | gj_188522266_gb_ACD60211.1 |
| 0.284754 | 0.661951 | 0.156303 | 0.367669 | gj_188522268_gb_ACD60213.1 |
|          |          |          |          |                            |

|                            |       |    |       |    |       |    |       |       |   |      |              |  |
|----------------------------|-------|----|-------|----|-------|----|-------|-------|---|------|--------------|--|
| gj_188522836_gb_ACD60781.1 | 0.165 | 33 | 0.114 | 33 | 0.119 | 5  | 0.08  | 0.098 | N | 0.57 | SignalP-noTM |  |
| gj_188522837_gb_ACD60782.1 | 0.254 | 27 | 0.178 | 14 | 0.406 | 8  | 0.324 | 0.232 | N | 0.51 | SignalP-TM   |  |
| gj_188522839_gb_ACD60784.1 | 0.117 | 46 | 0.112 | 46 | 0.152 | 42 | 0.079 | 0.097 | N | 0.57 | SignalP-noTM |  |
| gj_188522840_gb_ACD60785.1 | 0.125 | 31 | 0.113 | 51 | 0.143 | 26 | 0.095 | 0.105 | N | 0.57 | SignalP-noTM |  |
| gj_188522841_gb_ACD60786.1 | 0.126 | 24 | 0.136 | 11 | 0.27  | 4  | 0.193 | 0.163 | N | 0.57 | SignalP-noTM |  |
| gj_188522842_gb_ACD60787.1 | 0.176 | 24 | 0.238 | 24 | 0.483 | 12 | 0.32  | 0.268 | N | 0.51 | SignalP-TM   |  |
| gj_188522843_gb_ACD60788.1 | 0.129 | 6  | 0.1   | 32 | 0.117 | 10 | 0.088 | 0.094 | N | 0.57 | SignalP-noTM |  |
| gj_188522844_gb_ACD60789.1 | 0.172 | 56 | 0.123 | 56 | 0.138 | 5  | 0.094 | 0.109 | N | 0.57 | SignalP-noTM |  |
| gj_188522845_gb_ACD60790.1 | 0.106 | 49 | 0.116 | 33 | 0.191 | 5  | 0.125 | 0.12  | N | 0.57 | SignalP-noTM |  |
| gj_188522854_gb_ACD60799.1 | 0.106 | 40 | 0.107 | 29 | 0.136 | 22 | 0.106 | 0.107 | N | 0.57 | SignalP-noTM |  |
| gj_188522858_gb_ACD60803.1 | 0.745 | 27 | 0.847 | 27 | 0.981 | 23 | 0.952 | 0.896 | Y | 0.57 | SignalP-noTM |  |
| gj_188522859_gb_ACD60804.1 | 0.105 | 3  | 0.109 | 14 | 0.175 | 4  | 0.121 | 0.115 | N | 0.57 | SignalP-noTM |  |
| gj_188522865_gb_ACD60810.1 | 0.116 | 24 | 0.136 | 13 | 0.334 | 12 | 0.188 | 0.161 | N | 0.57 | SignalP-noTM |  |
| gj_188522866_gb_ACD60811.1 | 0.24  | 20 | 0.227 | 20 | 0.502 | 1  | 0.263 | 0.244 | N | 0.57 | SignalP-noTM |  |
| gj_188522870_gb_ACD60815.1 | 0.151 | 51 | 0.119 | 51 | 0.154 | 17 | 0.112 | 0.116 | N | 0.57 | SignalP-noTM |  |
| gj_188522871_gb_ACD60816.1 | 0.122 | 23 | 0.144 | 11 | 0.311 | 2  | 0.205 | 0.172 | N | 0.57 | SignalP-noTM |  |
| gj_188522872_gb_ACD60817.1 | 0.201 | 22 | 0.232 | 22 | 0.56  | 4  | 0.37  | 0.283 | N | 0.51 | SignalP-TM   |  |
| gj_188522874_gb_ACD60819.1 | 0.17  | 35 | 0.147 | 35 | 0.333 | 34 | 0.109 | 0.129 | N | 0.57 | SignalP-noTM |  |
| gj_188522875_gb_ACD60820.1 | 0.133 | 21 | 0.117 | 11 | 0.171 | 5  | 0.142 | 0.129 | N | 0.57 | SignalP-noTM |  |
| gj_188522876_gb_ACD60821.1 | 0.535 | 23 | 0.716 | 23 | 0.978 | 11 | 0.956 | 0.829 | Y | 0.57 | SignalP-noTM |  |
| gj_188522878_gb_ACD60823.1 | 0.111 | 9  | 0.106 | 68 | 0.124 | 62 | 0.089 | 0.098 | N | 0.57 | SignalP-noTM |  |
| gj_188522879_gb_ACD60824.1 | 0.113 | 9  | 0.115 | 11 | 0.191 | 1  | 0.131 | 0.123 | N | 0.57 | SignalP-noTM |  |
| gj_188522881_gb_ACD60826.1 | 0.417 | 18 | 0.534 | 18 | 0.827 | 17 | 0.668 | 0.597 | Y | 0.57 | SignalP-noTM |  |
| gj_188522883_gb_ACD60828.1 | 0.133 | 22 | 0.158 | 22 | 0.292 | 11 | 0.194 | 0.175 | N | 0.57 | SignalP-noTM |  |
| gj_188522885_gb_ACD60830.1 | 0.17  | 64 | 0.167 | 22 | 0.35  | 16 | 0.266 | 0.213 | N | 0.57 | SignalP-noTM |  |
| gj_188522888_gb_ACD60833.1 | 0.137 | 41 | 0.121 | 41 | 0.139 | 40 | 0.098 | 0.11  | N | 0.57 | SignalP-noTM |  |
| gj_188522889_gb_ACD60834.1 | 0.161 | 34 | 0.12  | 34 | 0.164 | 4  | 0.108 | 0.115 | N | 0.51 | SignalP-TM   |  |
| gj_188522890_gb_ACD60835.1 | 0.133 | 26 | 0.154 | 26 | 0.266 | 5  | 0.198 | 0.175 | N | 0.57 | SignalP-noTM |  |
| gj_188522893_gb_ACD60838.1 | 0.79  | 25 | 0.852 | 25 | 0.964 | 21 | 0.926 | 0.886 | Y | 0.57 | SignalP-noTM |  |
| gj_188522895_gb_ACD60840.1 | 0.117 | 25 | 0.151 | 18 | 0.238 | 16 | 0.202 | 0.175 | N | 0.57 | SignalP-noTM |  |
| gj_188522896_gb_ACD60841.1 | 0.105 | 20 | 0.101 | 62 | 0.133 | 1  | 0.095 | 0.098 | N | 0.57 | SignalP-noTM |  |
| gj_188522897_gb_ACD60842.1 | 0.167 | 35 | 0.167 | 35 | 0.368 | 34 | 0.165 | 0.166 | N | 0.57 | SignalP-noTM |  |
| gj_188522898_gb_ACD60843.1 | 0.111 | 39 | 0.111 | 39 | 0.124 | 34 | 0.096 | 0.104 | N | 0.57 | SignalP-noTM |  |
| gj_188522899_gb_ACD60844.1 | 0.12  | 51 | 0.145 | 11 | 0.28  | 4  | 0.214 | 0.177 | N | 0.57 | SignalP-noTM |  |
| gj_188522900_gb_ACD60845.1 | 0.109 | 59 | 0.127 | 11 | 0.202 | 2  | 0.163 | 0.144 | N | 0.57 | SignalP-noTM |  |
| gj_188523398_gb_ACD61343.1 | 0.163 | 53 | 0.162 | 53 | 0.254 | 50 | 0.131 | 0.148 | N | 0.57 | SignalP-noTM |  |
| gj_188523399_gb_ACD61344.1 | 0.125 | 54 | 0.125 | 54 | 0.19  | 51 | 0.119 | 0.123 | N | 0.57 | SignalP-noTM |  |
| gj_188523401_gb_ACD61346.1 | 0.134 | 16 | 0.114 | 11 | 0.196 | 1  | 0.124 | 0.118 | N | 0.51 | SignalP-TM   |  |
| gj_188523402_gb_ACD61347.1 | 0.133 | 43 | 0.118 | 43 | 0.12  | 42 | 0.089 | 0.105 | N | 0.57 | SignalP-noTM |  |
| gj_188523403_gb_ACD61348.1 | 0.121 | 31 | 0.128 | 48 | 0.238 | 42 | 0.122 | 0.125 | N | 0.57 | SignalP-noTM |  |
| gj_188523406_gb_ACD61351.1 | 0.199 | 34 | 0.183 | 12 | 0.409 | 2  | 0.337 | 0.24  | N | 0.51 | SignalP-TM   |  |
| gj_188523407_gb_ACD61352.1 | 0.115 | 34 | 0.14  | 11 | 0.248 | 2  | 0.208 | 0.165 | N | 0.51 | SignalP-TM   |  |
| gj_188523408_gb_ACD61353.1 | 0.126 | 48 | 0.125 | 11 | 0.228 | 1  | 0.154 | 0.138 | N | 0.57 | SignalP-noTM |  |
| gj_188523409_gb_ACD61354.1 | 0.182 | 24 | 0.383 | 24 | 0.956 | 13 | 0.859 | 0.607 | Y | 0.57 | SignalP-noTM |  |
| gj_188523413_gb_ACD61358.1 | 0.322 | 23 | 0.529 | 23 | 0.949 | 8  | 0.899 | 0.703 | Y | 0.57 | SignalP-noTM |  |
| gj_188523422_gb_ACD61367.1 | 0.117 | 23 | 0.11  | 11 | 0.158 | 1  | 0.119 | 0.114 | N | 0.57 | SignalP-noTM |  |
| gj_188523423_gb_ACD61368.1 | 0.144 | 25 | 0.161 | 11 | 0.371 | 1  | 0.252 | 0.204 | N | 0.57 | SignalP-noTM |  |
| gj_188523424_gb_ACD61369.1 | 0.154 | 23 | 0.153 | 23 | 0.341 | 33 | 0.147 | 0.151 | N | 0.57 | SignalP-noTM |  |
| gj_188523426_gb_ACD61371.1 | 0.118 | 36 | 0.118 | 36 | 0.144 | 25 | 0.111 | 0.115 | N | 0.57 | SignalP-noTM |  |
| gj_188523430_gb_ACD61375.1 | 0.773 | 33 | 0.866 | 33 | 0.994 | 21 | 0.918 | 0.89  | Y | 0.57 | SignalP-noTM |  |
| gj_188523431_gb_ACD61376.1 | 0.116 | 41 | 0.16  | 41 | 0.414 | 36 | 0.178 | 0.168 | N | 0.57 | SignalP-noTM |  |
| gj_188523443_gb_ACD61388.1 | 0.117 | 31 | 0.136 | 18 | 0.201 | 14 | 0.165 | 0.146 | N | 0.51 | SignalP-TM   |  |
| gj_188523450_gb_ACD61395.1 | 0.113 | 26 | 0.113 | 11 | 0.157 | 1  | 0.114 | 0.113 | N | 0.57 | SignalP-noTM |  |
| gj_188523452_gb_ACD61397.1 | 0.137 | 50 | 0.22  | 14 | 0.722 | 12 | 0.432 | 0.32  | N | 0.57 | SignalP-noTM |  |
| gj_188523454_gb_ACD61399.1 | 0.148 | 22 | 0.16  | 22 | 0.418 | 1  | 0.183 | 0.17  | N | 0.57 | SignalP-noTM |  |
| gj_188523455_gb_ACD61400.1 | 0.173 | 26 | 0.196 | 11 | 0.464 | 1  | 0.385 | 0.285 | N | 0.57 | SignalP-noTM |  |
| gj_188523458_gb_ACD61403.1 | 0.134 | 33 | 0.298 | 26 | 0.88  | 19 | 0.746 | 0.509 | N | 0.57 | SignalP-noTM |  |
| gj_188523461_gb_ACD61406.1 | 0.155 | 31 | 0.128 | 31 | 0.192 | 4  | 0.118 | 0.124 | N | 0.57 | SignalP-noTM |  |
| gj_188523464_gb_ACD61409.1 | 0.218 | 26 | 0.17  | 26 | 0.41  | 6  | 0.191 | 0.18  | N | 0.57 | SignalP-noTM |  |
| gj_188523465_gb_ACD61410.1 | 0.159 | 33 | 0.117 | 33 | 0.167 | 4  | 0.091 | 0.105 | N | 0.57 | SignalP-noTM |  |
| gj_188523466_gb_ACD61411.1 | 0.175 | 45 | 0.219 | 45 | 0.413 | 44 | 0.153 | 0.188 | N | 0.57 | SignalP-noTM |  |
| gj_188523467_gb_ACD61412.1 | 0.113 | 34 | 0.143 | 34 | 0.331 | 31 | 0.14  | 0.142 | N | 0.51 | SignalP-TM   |  |
| gj_188523468_gb_ACD61413.1 | 0.33  | 54 | 0.303 | 33 | 0.866 | 23 | 0.547 | 0.418 | N | 0.57 | SignalP-noTM |  |
| gj_188523476_gb_ACD61421.1 | 0.185 | 20 | 0.204 | 12 | 0.454 | 2  | 0.321 | 0.247 | N | 0.51 | SignalP-TM   |  |
| gj_188523478_gb_ACD61423.1 | 0.124 | 42 | 0.12  | 11 | 0.263 | 1  | 0.125 | 0.122 | N | 0.57 | SignalP-noTM |  |
| gj_188523479_gb_ACD61424.1 | 0.111 | 18 | 0.116 | 11 | 0.193 | 2  | 0.129 | 0.12  | N | 0.51 | SignalP-TM   |  |
| gj_188523480_gb_ACD61425.1 | 0.297 | 43 | 0.235 | 43 | 0.398 | 41 | 0.113 | 0.178 | N | 0.57 | SignalP-noTM |  |
| gj_188523481_gb_ACD61426.1 | 0.205 | 23 | 0.166 | 23 | 0.253 | 19 | 0.131 | 0.15  | N | 0.57 | SignalP-noTM |  |
| gj_188523482_gb_ACD61427.1 | 0.177 | 24 | 0.185 | 24 | 0.341 | 7  | 0.241 | 0.206 | N | 0.51 | SignalP-TM   |  |
| gj_188523485_gb_ACD61430.1 | 0.133 | 22 | 0.157 | 22 | 0.289 | 11 | 0.192 | 0.173 | N | 0.57 | SignalP-noTM |  |
| gj_188523486_gb_ACD61431.1 | 0.117 | 34 | 0.285 | 12 | 0.887 | 4  | 0.831 | 0.541 | N | 0.57 | SignalP-noTM |  |
| gj_188523490_gb_ACD61435.1 | 0.122 | 35 | 0.13  | 11 | 0.187 | 3  | 0.169 | 0.149 | N | 0.57 | SignalP-noTM |  |
| gj_188523493_gb_ACD61438.1 | 0.105 | 45 | 0.105 | 51 | 0.184 | 42 | 0.087 | 0.096 | N | 0.57 | SignalP-noTM |  |
| gj_188523495_gb_ACD61440.1 | 0.112 | 42 | 0.118 | 11 | 0.185 | 5  | 0.149 | 0.129 | N | 0.51 | SignalP-TM   |  |
| gj_188523497_gb_ACD61442.1 | 0.313 | 18 | 0.298 | 18 | 0.493 | 14 | 0.282 | 0.291 | N | 0.57 | SignalP-noTM |  |
| gj_188523498_gb_ACD61443.1 | 0.297 | 27 | 0.267 | 27 | 0.389 | 18 | 0.284 | 0.275 | N | 0.57 | SignalP-noTM |  |
| gj_188523499_gb_ACD61444.1 | 0.109 | 45 | 0.167 | 11 | 0.331 | 3  | 0.274 | 0.217 | N | 0.57 | SignalP-noTM |  |
| gj_188523500_gb_ACD61445.1 | 0.128 | 27 | 0.162 | 13 | 0.373 | 11 | 0.262 | 0.209 | N | 0.57 | SignalP-noTM |  |

|          |          |          |          |                            |  |
|----------|----------|----------|----------|----------------------------|--|
| 0.178873 | 0.980848 | 0.064405 | 0.408042 | gj_188522836_gb_ACD60781.1 |  |
| 0.15046  | 0.054526 | 0.148552 | 0.117846 | gj_188522837_gb_ACD60782.1 |  |
| 0.107936 | 0.076562 | 0.102569 | 0.095689 | gj_188522839_gb_ACD60784.1 |  |
| 0.134703 | 0.064949 | 0.13717  | 0.112274 | gj_188522840_gb_ACD60785.1 |  |
| 0.181979 | 0.82977  | 0.123251 | 0.378333 | gj_188522841_gb_ACD60786.1 |  |
| 0.119413 | 0.068498 | 0.191545 | 0.126485 | gj_188522842_gb_ACD60787.1 |  |
| 0.431435 | 0.010231 | 0.485004 | 0.30889  | gj_188522843_gb_ACD60788.1 |  |
| 0.082944 | 0.001149 | 0.114152 | 0.066082 | gj_188522844_gb_ACD60789.1 |  |
| 0.576641 | 0.985356 | 0.859965 | 0.807321 | gj_188522845_gb_ACD60790.1 |  |
| 0.805182 | 0.998364 | 0.768525 | 0.857357 | gj_188522854_gb_ACD60799.1 |  |
| 0.949502 | 0.922585 | 0.89989  | 0.923992 | gj_188522858_gb_ACD60803.1 |  |
| 0.070045 | 0.00729  | 0.096914 | 0.058083 | gj_188522859_gb_ACD60804.1 |  |
| 0.082716 | 0.057704 | 0.142583 | 0.094334 | gj_188522865_gb_ACD60810.1 |  |
| 0.195289 | 0.21032  | 0.17581  | 0.193806 | gj_188522866_gb_ACD60811.1 |  |
| 0.082944 | 0.002657 | 0.113548 | 0.066383 | gj_188522870_gb_ACD60815.1 |  |
| 0.133658 | 0.038791 | 0.161921 | 0.111457 | gj_188522871_gb_ACD60816.1 |  |
| 0.137881 | 0.136815 | 0.275678 | 0.183458 | gj_188522872_gb_ACD60817.1 |  |
| 0.370983 | 0.950216 | 0.185126 | 0.502108 | gj_188522874_gb_ACD60819.1 |  |
| 0.16645  | 0.9512   | 0.10147  | 0.406373 | gj_188522875_gb_ACD60820.1 |  |
| 0.088588 | 0.140035 | 0.16645  | 0.131691 | gj_188522876_gb_ACD60821.1 |  |
| 0.195761 | 0.828921 | 0.115679 | 0.38012  | gj_188522878_gb_ACD60823.1 |  |
| 0.673927 | 0.380129 | 0.796573 | 0.616876 | gj_188522879_gb_ACD60824.1 |  |
| 0.891775 | 0.867381 | 0.875119 | 0.878092 | gj_188522881_gb_ACD60826.1 |  |
| 0.840506 | 0.804711 | 0.85483  | 0.833349 | gj_188522883_gb_ACD60828.1 |  |
| 0.189694 | 0.139314 | 0.237938 | 0.188802 | gj_188522885_gb_ACD60830.1 |  |
| 0.066051 | 0.009728 | 0.083631 | 0.053137 | gj_188522888_gb_ACD60833.1 |  |
| 0.129544 | 0.092038 | 0.197182 | 0.139588 | gj_1885                    |  |

|                           |       |    |       |    |       |    |       |       |   |      |              |
|---------------------------|-------|----|-------|----|-------|----|-------|-------|---|------|--------------|
| gi_188523501_gb_ACD614461 | 0.115 | 19 | 0.097 | 44 | 0.103 | 36 | 0.077 | 0.087 | N | 0.57 | SignalP-noTM |
| gi_188523503_gb_ACD614481 | 0.122 | 27 | 0.117 | 27 | 0.164 | 26 | 0.107 | 0.112 | N | 0.57 | SignalP-noTM |
| gi_188523504_gb_ACD614491 | 0.103 | 27 | 0.139 | 40 | 0.253 | 36 | 0.139 | 0.139 | N | 0.57 | SignalP-noTM |
| gi_188523505_gb_ACD614501 | 0.196 | 41 | 0.154 | 41 | 0.193 | 37 | 0.109 | 0.133 | N | 0.57 | SignalP-noTM |
| gi_188523507_gb_ACD614521 | 0.236 | 17 | 0.442 | 17 | 0.937 | 1  | 0.845 | 0.631 | Y | 0.57 | SignalP-noTM |
| gi_188523513_gb_ACD614581 | 0.115 | 25 | 0.102 | 67 | 0.147 | 5  | 0.09  | 0.096 | N | 0.57 | SignalP-noTM |
| gi_188523516_gb_ACD614611 | 0.406 | 58 | 0.264 | 58 | 0.32  | 52 | 0.195 | 0.239 | N | 0.51 | SignalP-TM   |
| gi_188523518_gb_ACD614631 | 0.131 | 43 | 0.193 | 11 | 0.431 | 9  | 0.377 | 0.279 | N | 0.57 | SignalP-noTM |
| gi_188523519_gb_ACD614641 | 0.349 | 41 | 0.326 | 41 | 0.594 | 34 | 0.234 | 0.292 | N | 0.51 | SignalP-TM   |
| gi_188523522_gb_ACD614671 | 0.172 | 19 | 0.177 | 19 | 0.242 | 3  | 0.197 | 0.187 | N | 0.57 | SignalP-noTM |
| gi_188523523_gb_ACD614681 | 0.136 | 25 | 0.131 | 12 | 0.232 | 4  | 0.155 | 0.142 | N | 0.57 | SignalP-noTM |
| gi_188523527_gb_ACD614721 | 0.105 | 20 | 0.102 | 62 | 0.134 | 1  | 0.091 | 0.097 | N | 0.57 | SignalP-noTM |
| gi_188523530_gb_ACD614751 | 0.111 | 17 | 0.103 | 59 | 0.116 | 47 | 0.089 | 0.097 | N | 0.57 | SignalP-noTM |
| gi_188523531_gb_ACD614761 | 0.125 | 29 | 0.149 | 29 | 0.345 | 1  | 0.183 | 0.165 | N | 0.57 | SignalP-noTM |
| gi_188523533_gb_ACD614781 | 0.124 | 33 | 0.122 | 11 | 0.223 | 3  | 0.156 | 0.138 | N | 0.57 | SignalP-noTM |
| gi_188523535_gb_ACD614801 | 0.124 | 58 | 0.119 | 11 | 0.211 | 3  | 0.144 | 0.13  | N | 0.57 | SignalP-noTM |
| gi_188523537_gb_ACD614821 | 0.137 | 6  | 0.123 | 53 | 0.196 | 1  | 0.124 | 0.123 | N | 0.57 | SignalP-noTM |
| gi_188523538_gb_ACD614831 | 0.113 | 23 | 0.134 | 12 | 0.217 | 8  | 0.188 | 0.154 | N | 0.51 | SignalP-TM   |
| gi_188523539_gb_ACD614841 | 0.234 | 28 | 0.257 | 28 | 0.365 | 23 | 0.274 | 0.263 | N | 0.51 | SignalP-TM   |
| gi_188523540_gb_ACD614851 | 0.478 | 25 | 0.672 | 25 | 0.987 | 17 | 0.951 | 0.803 | Y | 0.57 | SignalP-noTM |
| gi_188523541_gb_ACD614861 | 0.277 | 29 | 0.198 | 29 | 0.281 | 1  | 0.164 | 0.182 | N | 0.57 | SignalP-noTM |
| gi_188523542_gb_ACD614871 | 0.269 | 23 | 0.504 | 23 | 0.978 | 19 | 0.939 | 0.708 | Y | 0.57 | SignalP-noTM |
| gi_188523547_gb_ACD614921 | 0.106 | 26 | 0.14  | 11 | 0.331 | 1  | 0.172 | 0.155 | N | 0.57 | SignalP-noTM |
| gi_188523549_gb_ACD614941 | 0.104 | 38 | 0.163 | 19 | 0.345 | 18 | 0.24  | 0.199 | N | 0.57 | SignalP-noTM |
| gi_188523551_gb_ACD614961 | 0.115 | 22 | 0.145 | 13 | 0.273 | 9  | 0.21  | 0.175 | N | 0.57 | SignalP-noTM |
| gi_188523552_gb_ACD614971 | 0.121 | 36 | 0.13  | 20 | 0.213 | 19 | 0.146 | 0.138 | N | 0.57 | SignalP-noTM |
| gi_188523555_gb_ACD615001 | 0.193 | 20 | 0.242 | 11 | 0.752 | 3  | 0.575 | 0.398 | N | 0.57 | SignalP-noTM |
| gi_188523556_gb_ACD615011 | 0.499 | 32 | 0.262 | 32 | 0.301 | 5  | 0.198 | 0.239 | N | 0.51 | SignalP-TM   |
| gi_188523557_gb_ACD615021 | 0.124 | 56 | 0.158 | 12 | 0.301 | 10 | 0.244 | 0.19  | N | 0.51 | SignalP-TM   |
| gi_188523562_gb_ACD615071 | 0.133 | 18 | 0.12  | 18 | 0.212 | 32 | 0.11  | 0.115 | N | 0.57 | SignalP-noTM |
| gi_188523572_gb_ACD615171 | 0.145 | 12 | 0.148 | 12 | 0.238 | 6  | 0.149 | 0.149 | N | 0.57 | SignalP-noTM |
| gi_188523575_gb_ACD615201 | 0.116 | 53 | 0.114 | 53 | 0.136 | 45 | 0.098 | 0.106 | N | 0.57 | SignalP-noTM |
| gi_188523576_gb_ACD615211 | 0.41  | 16 | 0.557 | 16 | 0.886 | 11 | 0.738 | 0.642 | Y | 0.57 | SignalP-noTM |
| gi_188523577_gb_ACD615221 | 0.212 | 26 | 0.151 | 26 | 0.253 | 1  | 0.133 | 0.143 | N | 0.57 | SignalP-noTM |
| gi_188523578_gb_ACD615231 | 0.117 | 25 | 0.152 | 18 | 0.238 | 16 | 0.202 | 0.175 | N | 0.57 | SignalP-noTM |
| gi_188523583_gb_ACD615281 | 0.133 | 35 | 0.118 | 40 | 0.144 | 34 | 0.1   | 0.109 | N | 0.57 | SignalP-noTM |
| gi_188523584_gb_ACD615291 | 0.142 | 48 | 0.112 | 48 | 0.151 | 3  | 0.1   | 0.106 | N | 0.57 | SignalP-noTM |
| gi_188523586_gb_ACD615311 | 0.122 | 45 | 0.133 | 11 | 0.264 | 1  | 0.168 | 0.15  | N | 0.57 | SignalP-noTM |
| gi_188523590_gb_ACD615351 | 0.116 | 53 | 0.114 | 53 | 0.136 | 45 | 0.098 | 0.106 | N | 0.57 | SignalP-noTM |
| gi_188523596_gb_ACD615411 | 0.339 | 26 | 0.566 | 26 | 0.99  | 17 | 0.936 | 0.74  | Y | 0.57 | SignalP-noTM |
| gi_188523597_gb_ACD615421 | 0.117 | 48 | 0.163 | 24 | 0.379 | 1  | 0.222 | 0.191 | N | 0.57 | SignalP-noTM |
| gi_188523601_gb_ACD615461 | 0.123 | 44 | 0.151 | 44 | 0.241 | 43 | 0.164 | 0.157 | N | 0.57 | SignalP-noTM |
| gi_188523603_gb_ACD615481 | 0.159 | 22 | 0.172 | 22 | 0.304 | 26 | 0.169 | 0.171 | N | 0.57 | SignalP-noTM |
| gi_188523609_gb_ACD615541 | 0.127 | 48 | 0.145 | 31 | 0.262 | 3  | 0.181 | 0.162 | N | 0.57 | SignalP-noTM |
| gi_188523610_gb_ACD615551 | 0.479 | 21 | 0.617 | 21 | 0.949 | 6  | 0.843 | 0.723 | Y | 0.57 | SignalP-noTM |
| gi_188523615_gb_ACD615601 | 0.736 | 30 | 0.735 | 30 | 0.91  | 9  | 0.789 | 0.76  | Y | 0.57 | SignalP-noTM |
| gi_188523616_gb_ACD615611 | 0.108 | 34 | 0.121 | 34 | 0.191 | 31 | 0.122 | 0.121 | N | 0.57 | SignalP-noTM |
| gi_188523617_gb_ACD615621 | 0.114 | 21 | 0.11  | 21 | 0.148 | 20 | 0.092 | 0.104 | N | 0.51 | SignalP-TM   |
| gi_188523618_gb_ACD615631 | 0.195 | 10 | 0.146 | 20 | 0.23  | 9  | 0.141 | 0.144 | N | 0.51 | SignalP-TM   |
| gi_188523619_gb_ACD615641 | 0.105 | 17 | 0.1   | 43 | 0.126 | 32 | 0.077 | 0.089 | N | 0.57 | SignalP-noTM |
| gi_188523621_gb_ACD615661 | 0.249 | 27 | 0.214 | 27 | 0.374 | 7  | 0.249 | 0.23  | N | 0.57 | SignalP-noTM |
| gi_188523622_gb_ACD615671 | 0.114 | 31 | 0.121 | 11 | 0.172 | 50 | 0.146 | 0.133 | N | 0.57 | SignalP-noTM |
| gi_188523624_gb_ACD615691 | 0.155 | 17 | 0.302 | 17 | 0.754 | 7  | 0.591 | 0.438 | N | 0.57 | SignalP-noTM |
| gi_188523625_gb_ACD615701 | 0.136 | 51 | 0.119 | 11 | 0.247 | 20 | 0.131 | 0.125 | N | 0.57 | SignalP-noTM |
| gi_188523628_gb_ACD615731 | 0.185 | 29 | 0.159 | 50 | 0.296 | 45 | 0.13  | 0.145 | N | 0.57 | SignalP-noTM |
| gi_188523630_gb_ACD615751 | 0.327 | 20 | 0.257 | 20 | 0.394 | 2  | 0.245 | 0.253 | N | 0.51 | SignalP-TM   |
| gi_188523631_gb_ACD615761 | 0.117 | 50 | 0.161 | 16 | 0.369 | 8  | 0.233 | 0.195 | N | 0.57 | SignalP-noTM |
| gi_188523632_gb_ACD615771 | 0.107 | 28 | 0.157 | 11 | 0.393 | 2  | 0.245 | 0.198 | N | 0.57 | SignalP-noTM |
| gi_188523636_gb_ACD615811 | 0.374 | 27 | 0.361 | 27 | 0.603 | 26 | 0.288 | 0.327 | N | 0.57 | SignalP-noTM |
| gi_188523637_gb_ACD615821 | 0.131 | 22 | 0.113 | 35 | 0.131 | 34 | 0.084 | 0.102 | N | 0.51 | SignalP-TM   |
| gi_188523639_gb_ACD615841 | 0.125 | 26 | 0.116 | 41 | 0.172 | 30 | 0.101 | 0.111 | N | 0.51 | SignalP-TM   |
| gi_188523640_gb_ACD615851 | 0.117 | 67 | 0.105 | 52 | 0.142 | 31 | 0.084 | 0.095 | N | 0.57 | SignalP-noTM |
| gi_188523644_gb_ACD615891 | 0.145 | 19 | 0.173 | 44 | 0.395 | 33 | 0.189 | 0.181 | N | 0.57 | SignalP-noTM |
| gi_188523645_gb_ACD615901 | 0.106 | 46 | 0.107 | 11 | 0.16  | 1  | 0.113 | 0.109 | N | 0.51 | SignalP-TM   |
| gi_188523646_gb_ACD615911 | 0.196 | 18 | 0.412 | 18 | 0.963 | 7  | 0.872 | 0.629 | Y | 0.57 | SignalP-noTM |
| gi_188523647_gb_ACD615921 | 0.115 | 30 | 0.113 | 60 | 0.171 | 48 | 0.104 | 0.108 | N | 0.57 | SignalP-noTM |
| gi_188523648_gb_ACD615931 | 0.116 | 22 | 0.123 | 22 | 0.19  | 1  | 0.13  | 0.127 | N | 0.57 | SignalP-noTM |
| gi_188523650_gb_ACD615951 | 0.12  | 35 | 0.151 | 35 | 0.284 | 24 | 0.179 | 0.164 | N | 0.57 | SignalP-noTM |
| gi_188523653_gb_ACD615981 | 0.204 | 23 | 0.191 | 23 | 0.226 | 19 | 0.182 | 0.187 | N | 0.51 | SignalP-TM   |
| gi_188523654_gb_ACD615991 | 0.131 | 22 | 0.126 | 22 | 0.149 | 2  | 0.127 | 0.126 | N | 0.57 | SignalP-noTM |
| gi_188523655_gb_ACD616001 | 0.142 | 42 | 0.105 | 62 | 0.116 | 57 | 0.075 | 0.091 | N | 0.57 | SignalP-noTM |
| gi_188523658_gb_ACD616031 | 0.122 | 33 | 0.122 | 33 | 0.155 | 29 | 0.122 | 0.122 | N | 0.57 | SignalP-noTM |
| gi_188523659_gb_ACD616041 | 0.186 | 17 | 0.385 | 17 | 0.882 | 12 | 0.798 | 0.579 | Y | 0.57 | SignalP-noTM |
| gi_188523662_gb_ACD616071 | 0.111 | 27 | 0.123 | 11 | 0.202 | 5  | 0.163 | 0.138 | N | 0.51 | SignalP-TM   |
| gi_188523670_gb_ACD616151 | 0.187 | 44 | 0.148 | 44 | 0.15  | 41 | 0.104 | 0.127 | N | 0.57 | SignalP-noTM |
| gi_188523671_gb_ACD616161 | 0.313 | 25 | 0.153 | 25 | 0.111 | 52 | 0.067 | 0.113 | N | 0.57 | SignalP-noTM |
| gi_188523672_gb_ACD616171 | 0.121 | 40 | 0.259 | 40 | 0.321 | 14 | 0.22  | 0.245 | N | 0.51 | SignalP-TM   |
| gi_188523676_gb_ACD616211 | 0.113 | 23 | 0.129 | 12 | 0.284 | 5  | 0.171 | 0.149 | N | 0.57 | SignalP-noTM |

|          |          |          |          |                           |
|----------|----------|----------|----------|---------------------------|
| 0.13193  | 0.352972 | 0.096129 | 0.193677 | gi_188523501_gb_ACD614461 |
| 0.186943 | 0.942784 | 0.279287 | 0.469671 | gi_188523503_gb_ACD614481 |
| 0.440286 | 0.984872 | 0.539666 | 0.654941 | gi_188523504_gb_ACD614491 |
| 0.093808 | 0.009031 | 0.123901 | 0.07558  | gi_188523505_gb_ACD614501 |
| 0.805182 | 0.818468 | 0.78768  | 0.80377  | gi_188523507_gb_ACD614521 |
| 0.075299 | 0.028195 | 0.114457 | 0.07265  | gi_188523513_gb_ACD614581 |
| 0.120999 | 0.085959 | 0.152387 | 0.119782 | gi_188523516_gb_ACD614611 |
| 0.378011 | 0.883706 | 0.50675  | 0.598489 | gi_188523518_gb_ACD614631 |
| 0.77539  | 0.781085 | 0.773819 | 0.77765  | gi_188523519_gb_ACD614641 |
| 0.105931 | 0.013762 | 0.177118 | 0.058937 | gi_188523522_gb_ACD614671 |
| 0.939118 | 0.999767 | 0.873471 | 0.937452 | gi_188523523_gb_ACD614681 |
| 0.048246 | 0.022776 | 0.105647 | 0.05889  | gi_188523527_gb_ACD614721 |
| 0.088588 | 0.02098  | 0.117533 | 0.0757   | gi_188523530_gb_ACD614751 |
| 0.827641 | 0.913568 | 0.867726 | 0.869645 | gi_188523531_gb_ACD614761 |
| 0.441026 | 0.838891 | 0.611352 | 0.630423 | gi_188523533_gb_ACD614781 |
| 0.168541 | 0.024507 | 0.228289 | 0.140446 | gi_188523535_gb_ACD614801 |
| 0.087864 | 0.085959 | 0.105081 | 0.092968 | gi_188523537_gb_ACD614821 |
| 0.126529 | 0.344795 | 0.158691 | 0.210005 | gi_188523538_gb_ACD614831 |
| 0.936672 | 0.999524 | 0.888251 | 0.941482 | gi_188523539_gb_ACD614841 |
| 0.78262  | 0.631812 | 0.843301 | 0.752578 | gi_188523540_gb_ACD614851 |
| 0.16645  | 0.015307 | 0.131244 | 0.104334 | gi_188523541_gb_ACD614861 |
| 0.953514 | 0.991155 | 0.909488 | 0.951539 | gi_188523542_gb_ACD614871 |
| 0.189233 | 0.040973 | 0.149694 | 0.126633 | gi_188523547_gb_ACD614921 |
| 0.752129 | 0.954826 | 0.427025 | 0.711327 | gi_188523549_gb_ACD614941 |
| 0.111452 | 0.14629  | 0.115373 | 0.124372 | gi_188523551_gb_ACD614961 |
| 0.344117 | 0.713409 | 0.470036 | 0.509187 | gi_188523552_gb_ACD614971 |
| 0.299643 | 0.852582 | 0.136461 | 0.429562 | gi_188523555_gb_ACD615001 |
| 0.128869 | 0.062797 | 0.164792 | 0.118819 | gi_188523556_gb_ACD615011 |
| 0.102845 | 0.007268 | 0.140397 | 0.083503 | gi_188523557_gb_ACD615021 |
| 0.342089 | 0.922799 | 0.085959 | 0.450282 | gi_188523562_gb_ACD615071 |
| 0.159896 | 0.15046  | 0.213325 | 0.17456  | gi_188523572_gb_ACD615171 |
| 0.142583 | 0.038346 | 0.108806 | 0.096578 | gi_188523575_gb_ACD615201 |
| 0.711566 | 0.950216 | 0.79462  | 0.818801 | gi_188523576_gb_ACD615211 |
| 0.943588 | 0.999723 | 0.880902 | 0.941404 | gi_188523577_gb_ACD615221 |
| 0.124553 | 0.103123 | 0.11385  | 0.113842 |                           |

|                            |       |    |       |    |       |    |       |       |   |      |              |  |
|----------------------------|-------|----|-------|----|-------|----|-------|-------|---|------|--------------|--|
| gj_188523678_gb_ACD61623.1 | 0.112 | 38 | 0.106 | 38 | 0.172 | 34 | 0.097 | 0.102 | N | 0.57 | SignalP-noTM |  |
| gj_188523679_gb_ACD61624.1 | 0.356 | 23 | 0.215 | 23 | 0.351 | 2  | 0.187 | 0.202 | N | 0.57 | SignalP-noTM |  |
| gj_188523680_gb_ACD61625.1 | 0.19  | 49 | 0.132 | 49 | 0.178 | 12 | 0.114 | 0.124 | N | 0.57 | SignalP-noTM |  |
| gj_188523690_gb_ACD61635.1 | 0.118 | 32 | 0.102 | 32 | 0.114 | 1  | 0.091 | 0.097 | N | 0.57 | SignalP-noTM |  |
| gj_188523702_gb_ACD61647.1 | 0.18  | 36 | 0.15  | 36 | 0.169 | 4  | 0.099 | 0.131 | N | 0.51 | SignalP-TM   |  |
| gj_188523703_gb_ACD61648.1 | 0.175 | 24 | 0.227 | 11 | 0.606 | 5  | 0.495 | 0.326 | N | 0.51 | SignalP-TM   |  |
| gj_188523705_gb_ACD61650.1 | 0.152 | 23 | 0.154 | 11 | 0.349 | 8  | 0.237 | 0.193 | N | 0.57 | SignalP-noTM |  |
| gj_188518734_gb_ACD56679.1 | 0.117 | 30 | 0.15  | 11 | 0.341 | 1  | 0.21  | 0.178 | N | 0.57 | SignalP-noTM |  |
| gj_188518735_gb_ACD56680.1 | 0.29  | 39 | 0.213 | 39 | 0.302 | 37 | 0.098 | 0.171 | N | 0.51 | SignalP-TM   |  |
| gj_188518736_gb_ACD56681.1 | 0.113 | 6  | 0.086 | 11 | 0.115 | 7  | 0.08  | 0.084 | N | 0.51 | SignalP-TM   |  |
| gj_188518737_gb_ACD56682.1 | 0.123 | 41 | 0.158 | 48 | 0.307 | 44 | 0.13  | 0.145 | N | 0.57 | SignalP-noTM |  |
| gj_188518738_gb_ACD56683.1 | 0.118 | 24 | 0.117 | 24 | 0.141 | 20 | 0.105 | 0.111 | N | 0.57 | SignalP-noTM |  |
| gj_188518741_gb_ACD56686.1 | 0.247 | 18 | 0.301 | 18 | 0.448 | 14 | 0.369 | 0.326 | N | 0.51 | SignalP-TM   |  |
| gj_188518742_gb_ACD56687.1 | 0.112 | 48 | 0.112 | 14 | 0.2   | 6  | 0.125 | 0.118 | N | 0.57 | SignalP-noTM |  |
| gj_188518743_gb_ACD56688.1 | 0.21  | 32 | 0.162 | 32 | 0.216 | 5  | 0.126 | 0.145 | N | 0.57 | SignalP-noTM |  |
| gj_188518744_gb_ACD56689.1 | 0.196 | 48 | 0.129 | 29 | 0.201 | 23 | 0.117 | 0.125 | N | 0.51 | SignalP-TM   |  |
| gj_188518745_gb_ACD56690.1 | 0.334 | 31 | 0.174 | 31 | 0.23  | 42 | 0.101 | 0.14  | N | 0.57 | SignalP-noTM |  |
| gj_188518746_gb_ACD56691.1 | 0.135 | 32 | 0.11  | 32 | 0.103 | 13 | 0.084 | 0.098 | N | 0.57 | SignalP-noTM |  |
| gj_188518748_gb_ACD56693.1 | 0.105 | 31 | 0.152 | 11 | 0.279 | 5  | 0.232 | 0.189 | N | 0.57 | SignalP-noTM |  |
| gj_188518749_gb_ACD56694.1 | 0.156 | 19 | 0.194 | 19 | 0.514 | 1  | 0.299 | 0.243 | N | 0.57 | SignalP-noTM |  |
| gj_188518750_gb_ACD56695.1 | 0.135 | 40 | 0.192 | 11 | 0.583 | 1  | 0.342 | 0.263 | N | 0.57 | SignalP-noTM |  |
| gj_188518753_gb_ACD56698.1 | 0.105 | 50 | 0.135 | 16 | 0.26  | 8  | 0.17  | 0.151 | N | 0.57 | SignalP-noTM |  |
| gj_188518754_gb_ACD56699.1 | 0.136 | 65 | 0.184 | 20 | 0.467 | 2  | 0.277 | 0.227 | N | 0.57 | SignalP-noTM |  |
| gj_188518755_gb_ACD56700.1 | 0.152 | 23 | 0.143 | 23 | 0.265 | 22 | 0.117 | 0.131 | N | 0.57 | SignalP-noTM |  |
| gj_188518756_gb_ACD56701.1 | 0.113 | 28 | 0.111 | 28 | 0.125 | 8  | 0.098 | 0.105 | N | 0.57 | SignalP-noTM |  |
| gj_188518758_gb_ACD56703.1 | 0.144 | 18 | 0.119 | 11 | 0.186 | 1  | 0.138 | 0.126 | N | 0.51 | SignalP-TM   |  |
| gj_188518759_gb_ACD56704.1 | 0.105 | 45 | 0.113 | 29 | 0.188 | 3  | 0.128 | 0.119 | N | 0.51 | SignalP-TM   |  |
| gj_188518760_gb_ACD56705.1 | 0.225 | 24 | 0.25  | 24 | 0.398 | 19 | 0.264 | 0.257 | N | 0.57 | SignalP-noTM |  |
| gj_188518761_gb_ACD56706.1 | 0.246 | 39 | 0.144 | 39 | 0.141 | 6  | 0.096 | 0.121 | N | 0.57 | SignalP-noTM |  |
| gj_188518762_gb_ACD56707.1 | 0.104 | 44 | 0.121 | 17 | 0.193 | 11 | 0.139 | 0.13  | N | 0.57 | SignalP-noTM |  |
| gj_188518763_gb_ACD56708.1 | 0.113 | 24 | 0.101 | 53 | 0.121 | 42 | 0.081 | 0.092 | N | 0.57 | SignalP-noTM |  |
| gj_188518764_gb_ACD56709.1 | 0.107 | 41 | 0.124 | 14 | 0.184 | 10 | 0.157 | 0.139 | N | 0.57 | SignalP-noTM |  |
| gj_188518769_gb_ACD56714.1 | 0.11  | 31 | 0.155 | 11 | 0.324 | 2  | 0.238 | 0.194 | N | 0.57 | SignalP-noTM |  |
| gj_188518770_gb_ACD56715.1 | 0.112 | 36 | 0.14  | 12 | 0.28  | 3  | 0.193 | 0.165 | N | 0.57 | SignalP-noTM |  |
| gj_188518774_gb_ACD56719.1 | 0.106 | 52 | 0.128 | 18 | 0.225 | 10 | 0.144 | 0.135 | N | 0.57 | SignalP-noTM |  |
| gj_188518777_gb_ACD56722.1 | 0.12  | 34 | 0.174 | 18 | 0.358 | 10 | 0.286 | 0.227 | N | 0.57 | SignalP-noTM |  |
| gj_188518778_gb_ACD56723.1 | 0.161 | 23 | 0.133 | 23 | 0.15  | 43 | 0.106 | 0.12  | N | 0.57 | SignalP-noTM |  |
| gj_188518783_gb_ACD56728.1 | 0.134 | 29 | 0.117 | 29 | 0.154 | 27 | 0.098 | 0.108 | N | 0.57 | SignalP-noTM |  |
| gj_188518784_gb_ACD56729.1 | 0.102 | 6  | 0.118 | 34 | 0.186 | 28 | 0.124 | 0.121 | N | 0.57 | SignalP-noTM |  |
| gj_188518785_gb_ACD56730.1 | 0.118 | 28 | 0.107 | 28 | 0.135 | 1  | 0.093 | 0.1   | N | 0.57 | SignalP-noTM |  |
| gj_188518786_gb_ACD56731.1 | 0.137 | 69 | 0.146 | 11 | 0.28  | 1  | 0.206 | 0.174 | N | 0.57 | SignalP-noTM |  |
| gj_188518791_gb_ACD56736.1 | 0.117 | 25 | 0.099 | 57 | 0.109 | 24 | 0.079 | 0.09  | N | 0.57 | SignalP-noTM |  |
| gj_188518792_gb_ACD56737.1 | 0.119 | 43 | 0.102 | 43 | 0.129 | 10 | 0.092 | 0.097 | N | 0.57 | SignalP-noTM |  |
| gj_188518793_gb_ACD56738.1 | 0.168 | 22 | 0.123 | 22 | 0.122 | 4  | 0.095 | 0.11  | N | 0.57 | SignalP-noTM |  |
| gj_188518794_gb_ACD56739.1 | 0.159 | 27 | 0.173 | 27 | 0.27  | 66 | 0.183 | 0.177 | N | 0.51 | SignalP-TM   |  |
| gj_188518795_gb_ACD56740.1 | 0.111 | 25 | 0.113 | 11 | 0.204 | 1  | 0.119 | 0.116 | N | 0.57 | SignalP-noTM |  |
| gj_188518796_gb_ACD56741.1 | 0.194 | 22 | 0.248 | 22 | 0.4   | 1  | 0.3   | 0.267 | N | 0.51 | SignalP-TM   |  |
| gj_188518797_gb_ACD56742.1 | 0.232 | 26 | 0.172 | 26 | 0.265 | 3  | 0.151 | 0.164 | N | 0.51 | SignalP-TM   |  |
| gj_188518798_gb_ACD56743.1 | 0.229 | 45 | 0.142 | 45 | 0.243 | 48 | 0.084 | 0.121 | N | 0.51 | SignalP-TM   |  |
| gj_188518800_gb_ACD56745.1 | 0.118 | 23 | 0.113 | 23 | 0.182 | 2  | 0.113 | 0.113 | N | 0.51 | SignalP-TM   |  |
| gj_188518801_gb_ACD56746.1 | 0.115 | 48 | 0.112 | 48 | 0.138 | 44 | 0.094 | 0.105 | N | 0.51 | SignalP-TM   |  |
| gj_188518809_gb_ACD56754.1 | 0.146 | 32 | 0.188 | 15 | 0.531 | 4  | 0.341 | 0.26  | N | 0.57 | SignalP-noTM |  |
| gj_188518812_gb_ACD56757.1 | 0.172 | 59 | 0.145 | 59 | 0.144 | 49 | 0.108 | 0.128 | N | 0.57 | SignalP-noTM |  |
| gj_188518813_gb_ACD56758.1 | 0.149 | 47 | 0.145 | 11 | 0.355 | 1  | 0.186 | 0.164 | N | 0.57 | SignalP-noTM |  |
| gj_188518815_gb_ACD56760.1 | 0.117 | 20 | 0.12  | 20 | 0.163 | 1  | 0.121 | 0.121 | N | 0.57 | SignalP-noTM |  |
| gj_188518817_gb_ACD56762.1 | 0.14  | 17 | 0.204 | 17 | 0.434 | 9  | 0.279 | 0.239 | N | 0.57 | SignalP-noTM |  |
| gj_188518818_gb_ACD56763.1 | 0.113 | 20 | 0.133 | 11 | 0.289 | 1  | 0.16  | 0.146 | N | 0.57 | SignalP-noTM |  |
| gj_188518819_gb_ACD56764.1 | 0.125 | 67 | 0.149 | 58 | 0.33  | 51 | 0.137 | 0.144 | N | 0.57 | SignalP-noTM |  |
| gj_188518820_gb_ACD56765.1 | 0.122 | 60 | 0.133 | 12 | 0.25  | 3  | 0.175 | 0.153 | N | 0.57 | SignalP-noTM |  |
| gj_188518821_gb_ACD56766.1 | 0.112 | 65 | 0.102 | 65 | 0.118 | 32 | 0.092 | 0.098 | N | 0.57 | SignalP-noTM |  |
| gj_188518823_gb_ACD56768.1 | 0.171 | 20 | 0.145 | 22 | 0.352 | 1  | 0.149 | 0.147 | N | 0.51 | SignalP-TM   |  |
| gj_188518826_gb_ACD56771.1 | 0.162 | 48 | 0.204 | 48 | 0.521 | 47 | 0.132 | 0.17  | N | 0.57 | SignalP-noTM |  |
| gj_188518828_gb_ACD56773.1 | 0.275 | 41 | 0.223 | 33 | 0.557 | 24 | 0.337 | 0.277 | N | 0.57 | SignalP-noTM |  |
| gj_188518830_gb_ACD56775.1 | 0.378 | 46 | 0.303 | 46 | 0.631 | 45 | 0.125 | 0.219 | N | 0.57 | SignalP-noTM |  |
| gj_188518831_gb_ACD56776.1 | 0.126 | 21 | 0.185 | 11 | 0.43  | 3  | 0.351 | 0.263 | N | 0.57 | SignalP-noTM |  |
| gj_188518840_gb_ACD56785.1 | 0.123 | 33 | 0.119 | 33 | 0.131 | 12 | 0.104 | 0.112 | N | 0.57 | SignalP-noTM |  |
| gj_188518841_gb_ACD56786.1 | 0.124 | 29 | 0.144 | 29 | 0.235 | 1  | 0.15  | 0.147 | N | 0.57 | SignalP-noTM |  |
| gj_188518843_gb_ACD56788.1 | 0.123 | 42 | 0.129 | 20 | 0.212 | 35 | 0.139 | 0.133 | N | 0.57 | SignalP-noTM |  |
| gj_188518847_gb_ACD56792.1 | 0.316 | 27 | 0.537 | 27 | 0.971 | 15 | 0.905 | 0.71  | Y | 0.57 | SignalP-noTM |  |
| gj_188518851_gb_ACD56796.1 | 0.216 | 26 | 0.333 | 18 | 0.813 | 16 | 0.552 | 0.436 | N | 0.57 | SignalP-noTM |  |
| gj_188518852_gb_ACD56797.1 | 0.142 | 31 | 0.127 | 11 | 0.205 | 3  | 0.157 | 0.141 | N | 0.57 | SignalP-noTM |  |
| gj_188518856_gb_ACD56801.1 | 0.16  | 46 | 0.195 | 46 | 0.298 | 43 | 0.189 | 0.192 | N | 0.57 | SignalP-noTM |  |
| gj_188518857_gb_ACD56802.1 | 0.155 | 42 | 0.146 | 42 | 0.214 | 19 | 0.138 | 0.142 | N | 0.57 | SignalP-noTM |  |
| gj_188518858_gb_ACD56803.1 | 0.134 | 32 | 0.139 | 40 | 0.228 | 39 | 0.098 | 0.12  | N | 0.57 | SignalP-noTM |  |
| gj_188518862_gb_ACD56807.1 | 0.124 | 34 | 0.156 | 30 | 0.275 | 6  | 0.219 | 0.18  | N | 0.51 | SignalP-TM   |  |
| gj_188518865_gb_ACD56810.1 | 0.134 | 52 | 0.207 | 11 | 0.573 | 1  | 0.41  | 0.302 | N | 0.57 | SignalP-noTM |  |
| gj_188518873_gb_ACD56818.1 | 0.155 | 42 | 0.145 | 42 | 0.21  | 19 | 0.138 | 0.141 | N | 0.57 | SignalP-noTM |  |
| gj_188518874_gb_ACD56819.1 | 0.102 | 44 | 0.131 | 51 | 0.206 | 42 | 0.116 | 0.124 | N | 0.57 | SignalP-noTM |  |

|          |          |          |          |                            |
|----------|----------|----------|----------|----------------------------|
| 0.091538 | 0.004038 | 0.140759 | 0.078778 | gj_188518748_gb_ACD56693.1 |
| 0.868413 | 0.999444 | 0.829346 | 0.899068 | gj_188518749_gb_ACD56694.1 |
| 0.086907 | 0.046887 | 0.110269 | 0.081354 | gj_188518750_gb_ACD56695.1 |
| 0.237398 | 0.548596 | 0.344117 | 0.376704 | gj_188518753_gb_ACD56698.1 |
| 0.816678 | 0.088346 | 0.76692  | 0.557315 | gj_188518754_gb_ACD56699.1 |
| 0.159092 | 0.14295  | 0.23041  | 0.177484 | gj_188518755_gb_ACD56700.1 |
| 0.769058 | 0.897707 | 0.439547 | 0.702104 | gj_188518756_gb_ACD56701.1 |
| 0.074055 | 0.45289  | 0.136461 | 0.221135 | gj_188518758_gb_ACD56703.1 |
| 0.782109 | 0.872806 | 0.856313 | 0.837076 | gj_188523650_gb_ACD61595.1 |
| 0.136815 | 0.226707 | 0.191545 | 0.185022 | gj_188523653_gb_ACD61598.1 |
| 0.282925 | 0.023869 | 0.328716 | 0.211837 | gj_188523654_gb_ACD61599.1 |
| 0.150077 | 0.247871 | 0.123575 | 0.173841 | gj_188523655_gb_ACD61600.1 |
| 0.891775 | 0.784654 | 0.665299 | 0.780576 | gj_188523658_gb_ACD61603.1 |
| 0.850216 | 0.999683 | 0.904909 | 0.951603 | gj_188523659_gb_ACD61604.1 |
| 0.161921 | 0.360545 | 0.103123 | 0.20853  | gj_188523662_gb_ACD61607.1 |
| 0.161109 | 0.154727 | 0.120363 | 0.1454   | gj_188523670_gb_ACD61615.1 |
| 0.250115 | 0.054526 | 0.370983 | 0.225208 | gj_188523671_gb_ACD61616.1 |
| 0.334033 | 0.640837 | 0.380129 | 0.451666 | gj_188523672_gb_ACD61617.1 |
| 0.376601 | 0.303434 | 0.589794 | 0.413003 | gj_188523676_gb_ACD61621.1 |
| 0.768525 | 0.978585 | 0.732041 | 0.826384 | gj_188523678_gb_ACD61623.1 |
| 0.951616 | 0.999245 | 0.883706 | 0.944856 | gj_188523679_gb_ACD61624.1 |
| 0.85483  | 0.998999 | 0.756023 | 0.869951 | gj_188523680_gb_ACD61625.1 |
| 0.078276 | 0.046887 | 0.082036 | 0.069066 | gj_188523690_gb_ACD61635.1 |
| 0.085489 | 0.801389 | 0.158291 | 0.34839  | gj_188523702_gb_ACD61647.1 |
| 0.107647 | 0.050498 | 0.17023  | 0.109458 | gj_188523703_gb_ACD61648.1 |
| 0.797057 | 0.733802 | 0.800433 | 0.777097 | gj_188523705_gb_ACD61650.1 |
| 0.266198 | 0.675902 | 0.305976 | 0.416025 | gj_188518843_gb_ACD56788.1 |
| 0.573709 | 0.325414 | 0.75547  | 0.515131 | gj_188518847_gb_ACD56792.1 |
| 0.141851 | 0.14295  | 0.126529 | 0.13711  | gj_188518851_gb_ACD56796.1 |
| 0.653849 | 0.6972   | 0.61633  | 0.655793 | gj_18                      |

|                             |       |    |       |    |       |    |       |       |   |      |              |
|-----------------------------|-------|----|-------|----|-------|----|-------|-------|---|------|--------------|
| gi_188518875_gb_ACD568201_1 | 0.161 | 26 | 0.113 | 47 | 0.148 | 38 | 0.087 | 0.101 | N | 0.57 | SignalP-noTM |
| gi_188518876_gb_ACD568211_1 | 0.115 | 19 | 0.146 | 11 | 0.367 | 1  | 0.191 | 0.167 | N | 0.57 | SignalP-noTM |
| gi_188518877_gb_ACD568221_1 | 0.145 | 46 | 0.151 | 20 | 0.2   | 67 | 0.158 | 0.153 | N | 0.51 | SignalP-TM   |
| gi_188518880_gb_ACD568251_1 | 0.216 | 32 | 0.193 | 32 | 0.383 | 4  | 0.25  | 0.219 | N | 0.57 | SignalP-noTM |
| gi_188518881_gb_ACD568261_1 | 0.284 | 28 | 0.173 | 28 | 0.219 | 50 | 0.098 | 0.137 | N | 0.57 | SignalP-noTM |
| gi_188518882_gb_ACD568271_1 | 0.111 | 29 | 0.134 | 29 | 0.201 | 25 | 0.149 | 0.141 | N | 0.57 | SignalP-noTM |
| gi_188518883_gb_ACD568281_1 | 0.131 | 6  | 0.125 | 21 | 0.188 | 18 | 0.136 | 0.13  | N | 0.57 | SignalP-noTM |
| gi_188518886_gb_ACD568311_1 | 0.131 | 23 | 0.164 | 23 | 0.295 | 14 | 0.191 | 0.177 | N | 0.57 | SignalP-noTM |
| gi_188518890_gb_ACD568351_1 | 0.283 | 18 | 0.369 | 18 | 0.717 | 49 | 0.497 | 0.416 | N | 0.51 | SignalP-TM   |
| gi_188518892_gb_ACD568371_1 | 0.149 | 34 | 0.126 | 21 | 0.182 | 2  | 0.138 | 0.132 | N | 0.57 | SignalP-noTM |
| gi_188518898_gb_ACD568431_1 | 0.155 | 42 | 0.145 | 42 | 0.21  | 19 | 0.138 | 0.141 | N | 0.57 | SignalP-noTM |
| gi_188518903_gb_ACD568481_1 | 0.106 | 31 | 0.137 | 12 | 0.265 | 3  | 0.186 | 0.16  | N | 0.57 | SignalP-noTM |
| gi_188518904_gb_ACD568491_1 | 0.109 | 57 | 0.138 | 11 | 0.252 | 2  | 0.193 | 0.164 | N | 0.57 | SignalP-noTM |
| gi_188518905_gb_ACD568501_1 | 0.131 | 45 | 0.167 | 45 | 0.32  | 33 | 0.174 | 0.17  | N | 0.57 | SignalP-noTM |
| gi_188518906_gb_ACD568511_1 | 0.105 | 20 | 0.117 | 20 | 0.198 | 17 | 0.127 | 0.122 | N | 0.57 | SignalP-noTM |
| gi_188518907_gb_ACD568521_1 | 0.108 | 24 | 0.11  | 38 | 0.128 | 37 | 0.108 | 0.109 | N | 0.57 | SignalP-noTM |
| gi_188518909_gb_ACD568541_1 | 0.178 | 26 | 0.205 | 26 | 0.461 | 24 | 0.252 | 0.227 | N | 0.57 | SignalP-noTM |
| gi_188518911_gb_ACD568561_1 | 0.131 | 14 | 0.16  | 47 | 0.48  | 40 | 0.13  | 0.146 | N | 0.57 | SignalP-noTM |
| gi_188518912_gb_ACD568571_1 | 0.415 | 35 | 0.195 | 35 | 0.178 | 21 | 0.108 | 0.154 | N | 0.57 | SignalP-noTM |
| gi_188518913_gb_ACD568581_1 | 0.173 | 27 | 0.125 | 11 | 0.258 | 1  | 0.147 | 0.135 | N | 0.57 | SignalP-noTM |
| gi_188518914_gb_ACD568591_1 | 0.106 | 26 | 0.105 | 70 | 0.151 | 4  | 0.092 | 0.099 | N | 0.57 | SignalP-noTM |
| gi_188518915_gb_ACD568601_1 | 0.199 | 35 | 0.143 | 35 | 0.249 | 1  | 0.139 | 0.141 | N | 0.57 | SignalP-noTM |
| gi_188518923_gb_ACD568681_1 | 0.133 | 22 | 0.158 | 22 | 0.292 | 11 | 0.194 | 0.175 | N | 0.57 | SignalP-noTM |
| gi_188518924_gb_ACD568691_1 | 0.134 | 17 | 0.123 | 41 | 0.156 | 1  | 0.103 | 0.114 | N | 0.57 | SignalP-noTM |
| gi_188518925_gb_ACD568701_1 | 0.112 | 40 | 0.101 | 65 | 0.111 | 24 | 0.086 | 0.094 | N | 0.57 | SignalP-noTM |
| gi_188518931_gb_ACD568761_1 | 0.105 | 18 | 0.109 | 11 | 0.15  | 1  | 0.12  | 0.114 | N | 0.57 | SignalP-noTM |
| gi_188518932_gb_ACD568771_1 | 0.115 | 23 | 0.133 | 56 | 0.227 | 48 | 0.13  | 0.131 | N | 0.57 | SignalP-noTM |
| gi_188518943_gb_ACD568881_1 | 0.142 | 32 | 0.134 | 19 | 0.188 | 43 | 0.143 | 0.138 | N | 0.57 | SignalP-noTM |
| gi_188518944_gb_ACD568891_1 | 0.419 | 21 | 0.588 | 21 | 0.915 | 1  | 0.849 | 0.711 | Y | 0.57 | SignalP-noTM |
| gi_188518948_gb_ACD568931_1 | 0.142 | 20 | 0.128 | 11 | 0.284 | 1  | 0.151 | 0.137 | N | 0.51 | SignalP-TM   |
| gi_188518949_gb_ACD568941_1 | 0.127 | 26 | 0.212 | 18 | 0.561 | 9  | 0.403 | 0.302 | N | 0.57 | SignalP-noTM |
| gi_188518950_gb_ACD568951_1 | 0.126 | 27 | 0.321 | 27 | 0.659 | 7  | 0.534 | 0.421 | N | 0.57 | SignalP-noTM |
| gi_188518951_gb_ACD568961_1 | 0.128 | 49 | 0.11  | 24 | 0.141 | 5  | 0.11  | 0.11  | N | 0.51 | SignalP-TM   |
| gi_188518952_gb_ACD568971_1 | 0.126 | 60 | 0.113 | 48 | 0.172 | 46 | 0.092 | 0.103 | N | 0.57 | SignalP-noTM |
| gi_188518956_gb_ACD569011_1 | 0.16  | 38 | 0.199 | 38 | 0.461 | 37 | 0.174 | 0.187 | N | 0.57 | SignalP-noTM |
| gi_188518957_gb_ACD569021_1 | 0.127 | 24 | 0.191 | 13 | 0.429 | 6  | 0.352 | 0.267 | N | 0.57 | SignalP-noTM |
| gi_188518958_gb_ACD569031_1 | 0.102 | 28 | 0.12  | 28 | 0.165 | 23 | 0.121 | 0.121 | N | 0.57 | SignalP-noTM |
| gi_188518963_gb_ACD569081_1 | 0.163 | 29 | 0.161 | 11 | 0.389 | 1  | 0.247 | 0.201 | N | 0.57 | SignalP-noTM |
| gi_188519087_gb_ACD570321_1 | 0.226 | 28 | 0.187 | 28 | 0.434 | 2  | 0.193 | 0.19  | N | 0.57 | SignalP-noTM |
| gi_188519092_gb_ACD570371_1 | 0.143 | 41 | 0.103 | 12 | 0.146 | 23 | 0.107 | 0.105 | N | 0.51 | SignalP-TM   |
| gi_188519093_gb_ACD570381_1 | 0.116 | 42 | 0.122 | 42 | 0.196 | 40 | 0.12  | 0.121 | N | 0.57 | SignalP-noTM |
| gi_188519094_gb_ACD570391_1 | 0.107 | 29 | 0.107 | 12 | 0.141 | 4  | 0.118 | 0.112 | N | 0.57 | SignalP-noTM |
| gi_188519097_gb_ACD570421_1 | 0.147 | 29 | 0.188 | 29 | 0.424 | 15 | 0.235 | 0.21  | N | 0.57 | SignalP-noTM |
| gi_188519099_gb_ACD570441_1 | 0.134 | 21 | 0.19  | 11 | 0.47  | 3  | 0.334 | 0.258 | N | 0.57 | SignalP-noTM |
| gi_188519102_gb_ACD570471_1 | 0.142 | 23 | 0.145 | 23 | 0.204 | 7  | 0.161 | 0.152 | N | 0.57 | SignalP-noTM |
| gi_188519104_gb_ACD570491_1 | 0.106 | 33 | 0.143 | 11 | 0.278 | 2  | 0.2   | 0.17  | N | 0.57 | SignalP-noTM |
| gi_188519105_gb_ACD570501_1 | 0.118 | 27 | 0.105 | 17 | 0.138 | 1  | 0.102 | 0.104 | N | 0.57 | SignalP-noTM |
| gi_188519106_gb_ACD570511_1 | 0.133 | 9  | 0.1   | 54 | 0.117 | 1  | 0.087 | 0.094 | N | 0.57 | SignalP-noTM |
| gi_188519107_gb_ACD570521_1 | 0.113 | 51 | 0.114 | 11 | 0.177 | 1  | 0.127 | 0.12  | N | 0.57 | SignalP-noTM |
| gi_188519109_gb_ACD570541_1 | 0.116 | 23 | 0.192 | 11 | 0.482 | 3  | 0.384 | 0.282 | N | 0.57 | SignalP-noTM |
| gi_188519111_gb_ACD570561_1 | 0.685 | 27 | 0.792 | 27 | 0.978 | 18 | 0.927 | 0.855 | Y | 0.57 | SignalP-noTM |
| gi_188519112_gb_ACD570571_1 | 0.146 | 69 | 0.303 | 18 | 0.823 | 11 | 0.623 | 0.453 | N | 0.57 | SignalP-noTM |
| gi_188519118_gb_ACD570631_1 | 0.228 | 37 | 0.165 | 37 | 0.179 | 12 | 0.123 | 0.145 | N | 0.57 | SignalP-noTM |
| gi_188519125_gb_ACD570701_1 | 0.102 | 23 | 0.1   | 23 | 0.113 | 1  | 0.088 | 0.095 | N | 0.57 | SignalP-noTM |
| gi_188519127_gb_ACD570721_1 | 0.241 | 36 | 0.145 | 36 | 0.161 | 1  | 0.091 | 0.12  | N | 0.57 | SignalP-noTM |
| gi_188519128_gb_ACD570731_1 | 0.109 | 16 | 0.176 | 12 | 0.386 | 1  | 0.307 | 0.237 | N | 0.57 | SignalP-noTM |
| gi_188519133_gb_ACD570781_1 | 0.148 | 26 | 0.121 | 26 | 0.135 | 42 | 0.088 | 0.105 | N | 0.57 | SignalP-noTM |
| gi_188519134_gb_ACD570791_1 | 0.121 | 69 | 0.128 | 15 | 0.215 | 4  | 0.158 | 0.142 | N | 0.57 | SignalP-noTM |
| gi_188519135_gb_ACD570801_1 | 0.156 | 20 | 0.148 | 20 | 0.176 | 19 | 0.136 | 0.142 | N | 0.57 | SignalP-noTM |
| gi_188519136_gb_ACD570811_1 | 0.125 | 18 | 0.102 | 37 | 0.112 | 36 | 0.081 | 0.092 | N | 0.57 | SignalP-noTM |
| gi_188519137_gb_ACD570821_1 | 0.402 | 30 | 0.196 | 30 | 0.135 | 35 | 0.073 | 0.138 | N | 0.57 | SignalP-noTM |
| gi_188519138_gb_ACD570831_1 | 0.118 | 62 | 0.145 | 11 | 0.296 | 3  | 0.213 | 0.177 | N | 0.57 | SignalP-noTM |
| gi_188519144_gb_ACD570891_1 | 0.117 | 68 | 0.128 | 68 | 0.143 | 1  | 0.09  | 0.11  | N | 0.57 | SignalP-noTM |
| gi_188519146_gb_ACD570911_1 | 0.116 | 24 | 0.18  | 11 | 0.472 | 3  | 0.319 | 0.245 | N | 0.57 | SignalP-noTM |
| gi_188519147_gb_ACD570921_1 | 0.173 | 26 | 0.138 | 26 | 0.209 | 1  | 0.111 | 0.125 | N | 0.57 | SignalP-noTM |
| gi_188519148_gb_ACD570931_1 | 0.162 | 54 | 0.148 | 54 | 0.202 | 28 | 0.133 | 0.141 | N | 0.57 | SignalP-noTM |
| gi_188519149_gb_ACD570941_1 | 0.168 | 26 | 0.134 | 26 | 0.178 | 21 | 0.108 | 0.121 | N | 0.57 | SignalP-noTM |
| gi_188519151_gb_ACD570961_1 | 0.172 | 43 | 0.205 | 11 | 0.63  | 1  | 0.411 | 0.302 | N | 0.57 | SignalP-noTM |
| gi_188519152_gb_ACD570971_1 | 0.119 | 28 | 0.12  | 12 | 0.213 | 5  | 0.153 | 0.135 | N | 0.57 | SignalP-noTM |
| gi_188519158_gb_ACD571031_1 | 0.177 | 33 | 0.122 | 33 | 0.122 | 4  | 0.08  | 0.103 | N | 0.57 | SignalP-noTM |
| gi_188519159_gb_ACD571041_1 | 0.143 | 18 | 0.151 | 18 | 0.233 | 2  | 0.174 | 0.162 | N | 0.57 | SignalP-noTM |
| gi_188519160_gb_ACD571051_1 | 0.156 | 22 | 0.122 | 31 | 0.17  | 29 | 0.098 | 0.11  | N | 0.57 | SignalP-noTM |
| gi_188519161_gb_ACD571061_1 | 0.135 | 25 | 0.111 | 25 | 0.134 | 5  | 0.094 | 0.103 | N | 0.57 | SignalP-noTM |
| gi_188519162_gb_ACD571071_1 | 0.183 | 35 | 0.154 | 35 | 0.191 | 34 | 0.123 | 0.139 | N | 0.57 | SignalP-noTM |
| gi_188519163_gb_ACD571081_1 | 0.166 | 35 | 0.149 | 35 | 0.22  | 31 | 0.123 | 0.137 | N | 0.57 | SignalP-noTM |
| gi_188519168_gb_ACD571131_1 | 0.238 | 32 | 0.154 | 32 | 0.187 | 8  | 0.115 | 0.139 | N | 0.51 | SignalP-TM   |
| gi_188519170_gb_ACD571151_1 | 0.156 | 65 | 0.13  | 65 | 0.195 | 49 | 0.12  | 0.125 | N | 0.57 | SignalP-noTM |
| gi_188519171_gb_ACD571161_1 | 0.815 | 22 | 0.771 | 22 | 0.889 | 2  | 0.775 | 0.773 | Y | 0.57 | SignalP-noTM |

|          |          |          |          |                             |
|----------|----------|----------|----------|-----------------------------|
| 0.631812 | 0.889731 | 0.581029 | 0.700857 | gi_188519094_gb_ACD570391_1 |
| 0.105647 | 0.095091 | 0.084556 | 0.095098 | gi_188519097_gb_ACD570421_1 |
| 0.554532 | 0.619871 | 0.709715 | 0.628039 | gi_188519099_gb_ACD570441_1 |
| 0.948632 | 0.996417 | 0.890319 | 0.945123 | gi_188519102_gb_ACD570471_1 |
| 0.054526 | 0.02129  | 0.135053 | 0.07029  | gi_188519104_gb_ACD570491_1 |
| 0.06192  | 0.001711 | 0.099571 | 0.054401 | gi_188519105_gb_ACD570501_1 |
| 0.163967 | 0.144056 | 0.135404 | 0.147809 | gi_188519106_gb_ACD570511_1 |
| 0.347511 | 0.029369 | 0.363316 | 0.246732 | gi_188519107_gb_ACD570521_1 |
| 0.09639  | 0.039015 | 0.105931 | 0.080405 | gi_188519109_gb_ACD570541_1 |
| 0.887054 | 0.714634 | 0.838485 | 0.813391 | gi_188519111_gb_ACD570561_1 |
| 0.953113 | 0.940811 | 0.933205 | 0.942376 | gi_188519112_gb_ACD570571_1 |
| 0.223567 | 0.154335 | 0.208334 | 0.195412 | gi_188519240_gb_ACD571851_1 |
| 0.31432  | 0.231475 | 0.427025 | 0.324273 | gi_188519243_gb_ACD571881_1 |
| 0.061226 | 0.001438 | 0.102018 | 0.054894 | gi_188519244_gb_ACD571891_1 |
| 0.058689 | 0.109097 | 0.059189 | 0.075659 | gi_188519245_gb_ACD571901_1 |
| 0.114762 | 0.057055 | 0.123575 | 0.098464 | gi_188519246_gb_ACD571911_1 |
| 0.148173 | 0.126198 | 0.110859 | 0.12841  | gi_188519252_gb_ACD571971_1 |
| 0.941475 | 0.992797 | 0.896877 | 0.943716 | gi_188519259_gb_ACD572041_1 |
| 0.851448 | 0.72492  | 0.767991 | 0.781453 | gi_188519265_gb_ACD572101_1 |
| 0.135404 | 0.084324 | 0.099571 | 0.106433 | gi_188519267_gb_ACD572121_1 |
| 0.163147 | 0.124227 | 0.20538  | 0.164251 | gi_188519270_gb_ACD572151_1 |
| 0.083402 | 0.001334 | 0.129206 | 0.071314 | gi_188519272_gb_ACD572171_1 |
| 0.076988 | 0.210818 | 0.087384 | 0.125063 | gi_188519274_gb_ACD572191_1 |
| 0.15046  | 0.096651 | 0.105997 | 0.118736 | gi_188519278_gb_ACD572231_1 |
| 0.14295  | 0.751569 | 0.286591 | 0.393703 | gi_188519279_gb_ACD572241_1 |
| 0.168962 | 0.731452 | 0.159494 | 0.353303 | gi_188519280_gb_ACD572251_1 |
| 0.138596 | 0.266784 | 0.137881 | 0.181087 | gi_188519281_gb_ACD572261_1 |
| 0.159092 | 0.358473 | 0.134005 | 0.21719  | gi_188519284_gb_ACD572291_1 |
| 0.112346 | 0.130222 | 0.103679 | 0.115446 | gi_188519285_gb_ACD572301_1 |
| 0.151228 | 0.327393 | 0.158291 | 0.212304 | gi_188519286_gb_ACD572311_1 |
| 0.126198 | 0.108806 | 0.130562 | 0.121855 | gi_188519287_gb_ACD572321_1 |
| 0.082036 | 0.006668 | 0.10147  | 0.063458 | gi_188519288_gb_ACD572331_1 |
| 0.95     |          |          |          |                             |

|                           |       |    |       |    |       |    |       |       |   |      |              |
|---------------------------|-------|----|-------|----|-------|----|-------|-------|---|------|--------------|
| gj_188519173_gb_ACD571181 | 0.135 | 19 | 0.184 | 19 | 0.33  | 1  | 0.264 | 0.222 | N | 0.57 | SignalP-noTM |
| gj_188519175_gb_ACD571201 | 0.129 | 25 | 0.136 | 11 | 0.234 | 1  | 0.189 | 0.155 | N | 0.51 | SignalIP-TM  |
| gj_188519176_gb_ACD571211 | 0.256 | 31 | 0.21  | 31 | 0.313 | 13 | 0.192 | 0.203 | N | 0.51 | SignalIP-TM  |
| gj_188519177_gb_ACD571221 | 0.172 | 38 | 0.156 | 28 | 0.235 | 26 | 0.164 | 0.16  | N | 0.57 | SignalP-noTM |
| gj_188519179_gb_ACD571241 | 0.365 | 29 | 0.558 | 16 | 0.964 | 10 | 0.919 | 0.727 | Y | 0.57 | SignalP-noTM |
| gj_188519181_gb_ACD571261 | 0.107 | 49 | 0.118 | 14 | 0.167 | 9  | 0.138 | 0.127 | N | 0.57 | SignalP-noTM |
| gj_188519182_gb_ACD571271 | 0.127 | 39 | 0.149 | 11 | 0.307 | 1  | 0.215 | 0.18  | N | 0.57 | SignalP-noTM |
| gj_188519183_gb_ACD571281 | 0.168 | 33 | 0.128 | 33 | 0.177 | 2  | 0.094 | 0.112 | N | 0.57 | SignalP-noTM |
| gj_188519184_gb_ACD571291 | 0.143 | 45 | 0.157 | 11 | 0.393 | 2  | 0.231 | 0.192 | N | 0.57 | SignalP-noTM |
| gj_188519193_gb_ACD571381 | 0.111 | 5  | 0.12  | 14 | 0.201 | 4  | 0.142 | 0.13  | N | 0.57 | SignalP-noTM |
| gj_188519196_gb_ACD571411 | 0.123 | 50 | 0.124 | 24 | 0.189 | 21 | 0.149 | 0.133 | N | 0.51 | SignalIP-TM  |
| gj_188519197_gb_ACD571421 | 0.162 | 14 | 0.22  | 14 | 0.468 | 10 | 0.308 | 0.261 | N | 0.57 | SignalP-noTM |
| gj_188519201_gb_ACD571461 | 0.108 | 64 | 0.107 | 20 | 0.134 | 9  | 0.101 | 0.104 | N | 0.57 | SignalP-noTM |
| gj_188519203_gb_ACD571481 | 0.105 | 39 | 0.102 | 53 | 0.116 | 44 | 0.079 | 0.091 | N | 0.57 | SignalP-noTM |
| gj_188519210_gb_ACD571551 | 0.262 | 19 | 0.263 | 19 | 0.385 | 8  | 0.266 | 0.264 | N | 0.51 | SignalIP-TM  |
| gj_188519211_gb_ACD571561 | 0.195 | 52 | 0.153 | 52 | 0.173 | 13 | 0.106 | 0.131 | N | 0.57 | SignalP-noTM |
| gj_188519218_gb_ACD571631 | 0.325 | 39 | 0.211 | 39 | 0.218 | 45 | 0.108 | 0.163 | N | 0.57 | SignalP-noTM |
| gj_188519222_gb_ACD571671 | 0.119 | 22 | 0.181 | 11 | 0.406 | 9  | 0.337 | 0.254 | N | 0.57 | SignalP-noTM |
| gj_188519227_gb_ACD571721 | 0.103 | 33 | 0.17  | 13 | 0.334 | 11 | 0.29  | 0.226 | N | 0.57 | SignalP-noTM |
| gj_188519230_gb_ACD571751 | 0.215 | 34 | 0.156 | 34 | 0.16  | 27 | 0.104 | 0.131 | N | 0.57 | SignalP-noTM |
| gj_188519231_gb_ACD571761 | 0.127 | 22 | 0.117 | 22 | 0.223 | 1  | 0.117 | 0.117 | N | 0.57 | SignalP-noTM |
| gj_188519232_gb_ACD571771 | 0.201 | 30 | 0.112 | 11 | 0.164 | 1  | 0.122 | 0.116 | N | 0.57 | SignalP-noTM |
| gj_188519239_gb_ACD571841 | 0.168 | 24 | 0.156 | 14 | 0.313 | 6  | 0.235 | 0.193 | N | 0.57 | SignalP-noTM |
| gj_188519240_gb_ACD571851 | 0.124 | 38 | 0.124 | 11 | 0.193 | 7  | 0.155 | 0.138 | N | 0.57 | SignalP-noTM |
| gj_188519243_gb_ACD571881 | 0.153 | 63 | 0.204 | 13 | 0.579 | 7  | 0.42  | 0.305 | N | 0.57 | SignalP-noTM |
| gj_188519244_gb_ACD571891 | 0.099 | 61 | 0.105 | 31 | 0.15  | 7  | 0.105 | 0.105 | N | 0.51 | SignalIP-TM  |
| gj_188519245_gb_ACD571901 | 0.116 | 16 | 0.119 | 16 | 0.157 | 10 | 0.113 | 0.116 | N | 0.57 | SignalP-noTM |
| gj_188519246_gb_ACD571911 | 0.141 | 65 | 0.194 | 11 | 0.614 | 2  | 0.349 | 0.251 | N | 0.51 | SignalIP-TM  |
| gj_188519252_gb_ACD571971 | 0.111 | 27 | 0.122 | 11 | 0.198 | 5  | 0.161 | 0.137 | N | 0.51 | SignalIP-TM  |
| gj_528897471_gb_ACD571982 | 0.116 | 66 | 0.12  | 58 | 0.197 | 1  | 0.107 | 0.114 | N | 0.57 | SignalP-noTM |
| gj_188519259_gb_ACD572041 | 0.129 | 30 | 0.179 | 11 | 0.433 | 1  | 0.3   | 0.236 | N | 0.57 | SignalP-noTM |
| gj_188519265_gb_ACD572101 | 0.569 | 26 | 0.589 | 26 | 0.955 | 1  | 0.761 | 0.67  | Y | 0.57 | SignalP-noTM |
| gj_188519267_gb_ACD572121 | 0.154 | 25 | 0.11  | 25 | 0.15  | 2  | 0.097 | 0.104 | N | 0.57 | SignalP-noTM |
| gj_188519270_gb_ACD572151 | 0.101 | 20 | 0.123 | 11 | 0.201 | 5  | 0.162 | 0.137 | N | 0.51 | SignalIP-TM  |
| gj_188519272_gb_ACD572171 | 0.119 | 54 | 0.164 | 14 | 0.362 | 6  | 0.268 | 0.213 | N | 0.57 | SignalP-noTM |
| gj_188519274_gb_ACD572191 | 0.121 | 46 | 0.112 | 46 | 0.137 | 32 | 0.101 | 0.107 | N | 0.57 | SignalP-noTM |
| gj_188519278_gb_ACD572231 | 0.112 | 27 | 0.125 | 11 | 0.205 | 5  | 0.167 | 0.14  | N | 0.51 | SignalIP-TM  |
| gj_188519279_gb_ACD572241 | 0.662 | 27 | 0.241 | 27 | 0.267 | 11 | 0.134 | 0.201 | N | 0.51 | SignalIP-TM  |
| gj_188519280_gb_ACD572251 | 0.119 | 52 | 0.133 | 11 | 0.217 | 1  | 0.17  | 0.15  | N | 0.57 | SignalP-noTM |
| gj_188519281_gb_ACD572261 | 0.138 | 37 | 0.133 | 16 | 0.239 | 1  | 0.148 | 0.14  | N | 0.57 | SignalP-noTM |
| gj_188519284_gb_ACD572291 | 0.115 | 45 | 0.14  | 11 | 0.311 | 2  | 0.188 | 0.162 | N | 0.57 | SignalP-noTM |
| gj_188519285_gb_ACD572301 | 0.155 | 34 | 0.131 | 34 | 0.145 | 31 | 0.098 | 0.116 | N | 0.57 | SignalP-noTM |
| gj_188519286_gb_ACD572311 | 0.102 | 23 | 0.121 | 11 | 0.24  | 1  | 0.138 | 0.129 | N | 0.57 | SignalP-noTM |
| gj_188519287_gb_ACD572321 | 0.157 | 29 | 0.179 | 29 | 0.426 | 24 | 0.194 | 0.186 | N | 0.57 | SignalP-noTM |
| gj_188519288_gb_ACD572331 | 0.119 | 62 | 0.127 | 13 | 0.22  | 11 | 0.162 | 0.143 | N | 0.57 | SignalP-noTM |
| gj_188519289_gb_ACD572341 | 0.148 | 40 | 0.331 | 17 | 0.901 | 10 | 0.824 | 0.563 | N | 0.57 | SignalP-noTM |
| gj_188519292_gb_ACD572371 | 0.103 | 26 | 0.186 | 11 | 0.588 | 1  | 0.323 | 0.25  | N | 0.57 | SignalP-noTM |
| gj_188519293_gb_ACD572381 | 0.166 | 67 | 0.172 | 11 | 0.41  | 1  | 0.29  | 0.216 | N | 0.51 | SignalIP-TM  |
| gj_188519294_gb_ACD572391 | 0.171 | 60 | 0.126 | 11 | 0.228 | 1  | 0.153 | 0.139 | N | 0.57 | SignalP-noTM |
| gj_188519295_gb_ACD572401 | 0.33  | 20 | 0.568 | 20 | 0.984 | 12 | 0.965 | 0.755 | Y | 0.57 | SignalP-noTM |
| gj_188519296_gb_ACD572411 | 0.268 | 31 | 0.17  | 31 | 0.176 | 30 | 0.117 | 0.145 | N | 0.57 | SignalP-noTM |
| gj_188519297_gb_ACD572421 | 0.134 | 19 | 0.163 | 11 | 0.336 | 2  | 0.27  | 0.202 | N | 0.51 | SignalIP-TM  |
| gj_188519298_gb_ACD572431 | 0.118 | 64 | 0.175 | 11 | 0.47  | 3  | 0.302 | 0.235 | N | 0.57 | SignalP-noTM |
| gj_188519300_gb_ACD572451 | 0.29  | 26 | 0.241 | 26 | 0.379 | 25 | 0.171 | 0.215 | N | 0.51 | SignalIP-TM  |
| gj_188519301_gb_ACD572461 | 0.204 | 24 | 0.138 | 42 | 0.148 | 38 | 0.093 | 0.116 | N | 0.57 | SignalP-noTM |
| gj_188519302_gb_ACD572471 | 0.115 | 20 | 0.12  | 12 | 0.179 | 6  | 0.152 | 0.132 | N | 0.51 | SignalIP-TM  |
| gj_188519303_gb_ACD572481 | 0.465 | 21 | 0.567 | 15 | 0.862 | 11 | 0.737 | 0.646 | Y | 0.57 | SignalP-noTM |
| gj_188519304_gb_ACD572491 | 0.157 | 33 | 0.275 | 33 | 0.663 | 30 | 0.354 | 0.312 | N | 0.57 | SignalP-noTM |
| gj_188519305_gb_ACD572501 | 0.115 | 28 | 0.226 | 20 | 0.576 | 8  | 0.426 | 0.32  | N | 0.57 | SignalP-noTM |
| gj_188519310_gb_ACD572551 | 0.222 | 41 | 0.228 | 11 | 0.645 | 3  | 0.541 | 0.375 | N | 0.57 | SignalP-noTM |
| gj_188519312_gb_ACD572571 | 0.114 | 50 | 0.154 | 11 | 0.294 | 5  | 0.246 | 0.188 | N | 0.51 | SignalIP-TM  |
| gj_188519313_gb_ACD572581 | 0.14  | 37 | 0.169 | 11 | 0.343 | 2  | 0.295 | 0.215 | N | 0.51 | SignalIP-TM  |
| gj_188519314_gb_ACD572591 | 0.136 | 35 | 0.181 | 35 | 0.396 | 23 | 0.237 | 0.202 | N | 0.51 | SignalIP-TM  |
| gj_188519317_gb_ACD572621 | 0.117 | 40 | 0.12  | 40 | 0.153 | 8  | 0.115 | 0.117 | N | 0.57 | SignalP-noTM |
| gj_188519321_gb_ACD572661 | 0.175 | 33 | 0.148 | 33 | 0.218 | 32 | 0.113 | 0.132 | N | 0.57 | SignalP-noTM |
| gj_188519323_gb_ACD572681 | 0.103 | 36 | 0.132 | 11 | 0.222 | 5  | 0.185 | 0.152 | N | 0.51 | SignalIP-TM  |
| gj_188519324_gb_ACD572691 | 0.136 | 22 | 0.12  | 11 | 0.214 | 2  | 0.139 | 0.129 | N | 0.57 | SignalP-noTM |
| gj_188519328_gb_ACD572731 | 0.17  | 35 | 0.148 | 35 | 0.336 | 34 | 0.114 | 0.132 | N | 0.57 | SignalP-noTM |
| gj_188519330_gb_ACD572751 | 0.132 | 40 | 0.127 | 40 | 0.177 | 5  | 0.12  | 0.125 | N | 0.51 | SignalIP-TM  |
| gj_188519337_gb_ACD572821 | 0.118 | 60 | 0.15  | 11 | 0.368 | 1  | 0.202 | 0.174 | N | 0.57 | SignalP-noTM |
| gj_188519340_gb_ACD572851 | 0.178 | 70 | 0.139 | 11 | 0.323 | 1  | 0.175 | 0.156 | N | 0.57 | SignalP-noTM |
| gj_188519345_gb_ACD572901 | 0.156 | 42 | 0.146 | 42 | 0.219 | 19 | 0.143 | 0.145 | N | 0.57 | SignalP-noTM |
| gj_188519346_gb_ACD572911 | 0.105 | 20 | 0.102 | 62 | 0.136 | 1  | 0.094 | 0.098 | N | 0.57 | SignalP-noTM |
| gj_188519347_gb_ACD572921 | 0.157 | 61 | 0.141 | 11 | 0.296 | 1  | 0.188 | 0.163 | N | 0.57 | SignalP-noTM |
| gj_188519354_gb_ACD572991 | 0.162 | 24 | 0.105 | 11 | 0.156 | 1  | 0.11  | 0.107 | N | 0.51 | SignalIP-TM  |
| gj_188519359_gb_ACD573041 | 0.171 | 30 | 0.377 | 30 | 0.953 | 25 | 0.871 | 0.609 | Y | 0.57 | SignalP-noTM |
| gj_188519360_gb_ACD573051 | 0.214 | 36 | 0.37  | 36 | 0.766 | 31 | 0.446 | 0.398 | N | 0.51 | SignalIP-TM  |
| gj_188519365_gb_ACD573101 | 0.114 | 22 | 0.144 | 13 | 0.262 | 9  | 0.209 | 0.175 | N | 0.57 | SignalP-noTM |

|          |          |          |          |                           |
|----------|----------|----------|----------|---------------------------|
| 0.117845 | 0.030858 | 0.167284 | 0.105329 | gj_188519383_gb_ACD573281 |
| 0.711566 | 0.935595 | 0.683737 | 0.776966 | gj_188519384_gb_ACD573291 |
| 0.216361 | 0.247312 | 0.154335 | 0.206003 | gj_188519390_gb_ACD573351 |
| 0.934869 | 0.995752 | 0.863185 | 0.931269 | gj_188519392_gb_ACD573371 |
| 0.161515 | 0.074468 | 0.144798 | 0.126927 | gj_188519393_gb_ACD573381 |
| 0.135755 | 0.049784 | 0.177118 | 0.120886 | gj_188519394_gb_ACD573391 |
| 0.125209 | 0.07024  | 0.139314 | 0.111588 | gj_188519395_gb_ACD573401 |
| 0.27032  | 0.829346 | 0.256355 | 0.452007 | gj_188519397_gb_ACD573421 |
| 0.274482 | 0.938946 | 0.460334 | 0.557921 | gj_188519401_gb_ACD573461 |
| 0.21738  | 0.649764 | 0.215853 | 0.360999 | gj_188519402_gb_ACD573471 |
| 0.203915 | 0.057704 | 0.282925 | 0.181515 | gj_188519403_gb_ACD573481 |
| 0.13331  | 0.026831 | 0.348191 | 0.169444 | gj_188519404_gb_ACD573491 |
| 0.088105 | 0.00118  | 0.104238 | 0.064508 | gj_188519405_gb_ACD573501 |
| 0.227233 | 0.07806  | 0.142217 | 0.14917  | gj_188519406_gb_ACD573511 |
| 0.116294 | 0.00695  | 0.255784 | 0.126343 | gj_188519407_gb_ACD573521 |
| 0.285366 | 0.730862 | 0.335369 | 0.450532 | gj_188519411_gb_ACD573561 |
| 0.50225  | 0.048522 | 0.676558 | 0.40911  | gj_188519413_gb_ACD573581 |
| 0.902824 | 0.548596 | 0.913331 | 0.78825  | gj_188519419_gb_ACD573641 |
| 0.135404 | 0.034357 | 0.16645  | 0.11207  | gj_188519420_gb_ACD573651 |
| 0.175375 | 0.033278 | 0.389361 | 0.199338 | gj_188519421_gb_ACD573661 |
| 0.184673 | 0.380836 | 0.147418 | 0.237642 | gj_188519422_gb_ACD573671 |
| 0.897431 | 0.998173 | 0.689546 | 0.861717 | gj_188519424_gb_ACD573691 |
| 0.878361 | 0.99975  | 0.678525 | 0.852212 | gj_188519425_gb_ACD573701 |
| 0.136108 | 0.956353 | 0.091289 | 0.394583 | gj_188519426_gb_ACD573711 |
| 0.123575 | 0.370983 | 0.09984  | 0.198133 | gj_188519428_gb_ACD573731 |
| 0.118157 | 0.275678 | 0.21032  | 0.201385 | gj_188519429_gb_ACD573741 |
| 0.059524 | 0.001569 | 0.151228 | 0.070774 | gj_188519433_gb_ACD573781 |
| 0.399392 | 0.889141 | 0.326073 | 0.538202 | gj_188519434_gb_ACD573791 |
| 0.369594 | 0.816228 | 0.530711 | 0.572174 | gj_188519440_gb_ACD573851 |
| 0.181979 | 0.203429 | 0.130562 | 0.17199  | gj_188519441_gb_ACD573861 |
| 0.682438 | 0.840506 | 0.810306 | 0.77775  | gj_188519442_gb_ACD573871 |
| 0.827976 | 0.993334 | 0.843697 | 0.921669 | gj_188519443_gb_ACD573881 |
| 0.676558 | 0.406609 | 0.827213 | 0.636793 | gj_188519445_gb_ACD573901 |
| 0.157493 | 0.629017 | 0.240672 | 0.342394 | gj_188519446_gb_ACD573911 |
| 0.143318 | 0.056094 | 0.208829 | 0.13608  | gj_188519451_gb_ACD573961 |

|                            |       |    |       |    |       |    |       |       |   |      |              |  |
|----------------------------|-------|----|-------|----|-------|----|-------|-------|---|------|--------------|--|
| gj_188519366_gb_ACD57311_1 | 0.113 | 17 | 0.108 | 32 | 0.129 | 24 | 0.093 | 0.101 | N | 0.57 | SignalP-noTM |  |
| gj_188519367_gb_ACD57312_1 | 0.226 | 56 | 0.199 | 37 | 0.262 | 35 | 0.155 | 0.178 | N | 0.57 | SignalP-noTM |  |
| gj_188519368_gb_ACD57313_1 | 0.112 | 29 | 0.2   | 11 | 0.524 | 1  | 0.387 | 0.288 | N | 0.57 | SignalP-noTM |  |
| gj_188519371_gb_ACD57316_1 | 0.36  | 22 | 0.574 | 22 | 0.949 | 13 | 0.921 | 0.737 | Y | 0.57 | SignalP-noTM |  |
| gj_188519374_gb_ACD57319_1 | 0.126 | 22 | 0.226 | 15 | 0.621 | 12 | 0.468 | 0.34  | N | 0.57 | SignalP-noTM |  |
| gj_188519376_gb_ACD57321_1 | 0.177 | 64 | 0.24  | 16 | 0.695 | 46 | 0.435 | 0.332 | N | 0.57 | SignalP-noTM |  |
| gj_188519377_gb_ACD57322_1 | 0.814 | 19 | 0.883 | 19 | 0.976 | 9  | 0.954 | 0.916 | Y | 0.57 | SignalP-noTM |  |
| gj_188519378_gb_ACD57323_1 | 0.237 | 22 | 0.175 | 22 | 0.189 | 12 | 0.138 | 0.158 | N | 0.57 | SignalP-noTM |  |
| gj_188519379_gb_ACD57324_1 | 0.145 | 15 | 0.121 | 15 | 0.152 | 12 | 0.098 | 0.11  | N | 0.57 | SignalP-noTM |  |
| gj_188519380_gb_ACD57325_1 | 0.157 | 64 | 0.123 | 13 | 0.209 | 9  | 0.155 | 0.138 | N | 0.57 | SignalP-noTM |  |
| gj_188519381_gb_ACD57326_1 | 0.21  | 37 | 0.202 | 37 | 0.315 | 23 | 0.18  | 0.191 | N | 0.57 | SignalP-noTM |  |
| gj_188519382_gb_ACD57327_1 | 0.179 | 22 | 0.152 | 22 | 0.17  | 16 | 0.105 | 0.13  | N | 0.57 | SignalP-noTM |  |
| gj_188519383_gb_ACD57328_1 | 0.161 | 58 | 0.116 | 33 | 0.156 | 32 | 0.081 | 0.1   | N | 0.57 | SignalP-noTM |  |
| gj_188519384_gb_ACD57329_1 | 0.12  | 49 | 0.14  | 11 | 0.345 | 10 | 0.192 | 0.164 | N | 0.57 | SignalP-noTM |  |
| gj_188519390_gb_ACD57335_1 | 0.183 | 52 | 0.156 | 11 | 0.374 | 3  | 0.24  | 0.195 | N | 0.57 | SignalP-noTM |  |
| gj_188519392_gb_ACD57337_1 | 0.284 | 21 | 0.345 | 21 | 0.697 | 1  | 0.463 | 0.4   | N | 0.57 | SignalP-noTM |  |
| gj_188519393_gb_ACD57338_1 | 0.114 | 51 | 0.111 | 51 | 0.178 | 35 | 0.094 | 0.105 | N | 0.51 | SignalP-TM   |  |
| gj_188519394_gb_ACD57339_1 | 0.112 | 19 | 0.102 | 46 | 0.14  | 62 | 0.081 | 0.094 | N | 0.51 | SignalP-TM   |  |
| gj_188519395_gb_ACD57340_1 | 0.133 | 46 | 0.126 | 46 | 0.186 | 1  | 0.107 | 0.117 | N | 0.57 | SignalP-noTM |  |
| gj_188519397_gb_ACD57342_1 | 0.127 | 6  | 0.165 | 11 | 0.412 | 3  | 0.275 | 0.217 | N | 0.57 | SignalP-noTM |  |
| gj_188519401_gb_ACD57346_1 | 0.102 | 44 | 0.112 | 18 | 0.168 | 9  | 0.109 | 0.111 | N | 0.57 | SignalP-noTM |  |
| gj_188519402_gb_ACD57347_1 | 0.104 | 22 | 0.122 | 27 | 0.173 | 21 | 0.138 | 0.129 | N | 0.57 | SignalP-noTM |  |
| gj_188519403_gb_ACD57348_1 | 0.214 | 40 | 0.15  | 40 | 0.154 | 31 | 0.092 | 0.123 | N | 0.57 | SignalP-noTM |  |
| gj_188519404_gb_ACD57349_1 | 0.108 | 50 | 0.096 | 60 | 0.113 | 49 | 0.081 | 0.089 | N | 0.57 | SignalP-noTM |  |
| gj_188519405_gb_ACD57350_1 | 0.114 | 19 | 0.101 | 44 | 0.105 | 35 | 0.075 | 0.089 | N | 0.57 | SignalP-noTM |  |
| gj_188519406_gb_ACD57351_1 | 0.132 | 33 | 0.117 | 15 | 0.182 | 9  | 0.134 | 0.125 | N | 0.57 | SignalP-noTM |  |
| gj_188519407_gb_ACD57352_1 | 0.114 | 17 | 0.118 | 11 | 0.158 | 1  | 0.14  | 0.128 | N | 0.57 | SignalP-noTM |  |
| gj_188519411_gb_ACD57356_1 | 0.155 | 42 | 0.145 | 42 | 0.21  | 19 | 0.138 | 0.141 | N | 0.57 | SignalP-noTM |  |
| gj_188519413_gb_ACD57358_1 | 0.116 | 17 | 0.117 | 11 | 0.206 | 1  | 0.126 | 0.121 | N | 0.57 | SignalP-noTM |  |
| gj_188519419_gb_ACD57364_1 | 0.132 | 39 | 0.116 | 39 | 0.162 | 1  | 0.111 | 0.114 | N | 0.57 | SignalP-noTM |  |
| gj_188519420_gb_ACD57365_1 | 0.113 | 30 | 0.103 | 60 | 0.109 | 49 | 0.063 | 0.088 | N | 0.51 | SignalP-TM   |  |
| gj_188519421_gb_ACD57366_1 | 0.203 | 25 | 0.22  | 25 | 0.289 | 23 | 0.225 | 0.222 | N | 0.51 | SignalP-TM   |  |
| gj_188519422_gb_ACD57367_1 | 0.204 | 36 | 0.207 | 12 | 0.635 | 2  | 0.431 | 0.312 | N | 0.57 | SignalP-noTM |  |
| gj_188519424_gb_ACD57369_1 | 0.17  | 18 | 0.128 | 18 | 0.184 | 1  | 0.106 | 0.117 | N | 0.57 | SignalP-noTM |  |
| gj_188519425_gb_ACD57370_1 | 0.11  | 19 | 0.124 | 11 | 0.245 | 2  | 0.148 | 0.135 | N | 0.57 | SignalP-noTM |  |
| gj_188519426_gb_ACD57371_1 | 0.11  | 25 | 0.121 | 52 | 0.166 | 49 | 0.097 | 0.11  | N | 0.57 | SignalP-noTM |  |
| gj_188519428_gb_ACD57373_1 | 0.107 | 33 | 0.11  | 33 | 0.143 | 47 | 0.095 | 0.103 | N | 0.57 | SignalP-noTM |  |
| gj_188519429_gb_ACD57374_1 | 0.17  | 67 | 0.152 | 67 | 0.208 | 7  | 0.099 | 0.132 | N | 0.51 | SignalP-TM   |  |
| gj_188519433_gb_ACD57378_1 | 0.14  | 32 | 0.111 | 32 | 0.131 | 31 | 0.08  | 0.096 | N | 0.57 | SignalP-noTM |  |
| gj_188519434_gb_ACD57379_1 | 0.101 | 26 | 0.128 | 12 | 0.191 | 6  | 0.166 | 0.146 | N | 0.57 | SignalP-noTM |  |
| gj_188519440_gb_ACD57385_1 | 0.107 | 57 | 0.108 | 11 | 0.177 | 2  | 0.113 | 0.11  | N | 0.57 | SignalP-noTM |  |
| gj_188519441_gb_ACD57386_1 | 0.111 | 26 | 0.123 | 26 | 0.181 | 18 | 0.115 | 0.119 | N | 0.57 | SignalP-noTM |  |
| gj_188519442_gb_ACD57387_1 | 0.108 | 36 | 0.123 | 12 | 0.205 | 3  | 0.15  | 0.136 | N | 0.57 | SignalP-noTM |  |
| gj_188519443_gb_ACD57388_1 | 0.655 | 24 | 0.8   | 24 | 0.995 | 12 | 0.972 | 0.881 | Y | 0.57 | SignalP-noTM |  |
| gj_188519445_gb_ACD57390_1 | 0.114 | 53 | 0.139 | 11 | 0.25  | 3  | 0.191 | 0.163 | N | 0.57 | SignalP-noTM |  |
| gj_188519446_gb_ACD57391_1 | 0.184 | 18 | 0.308 | 18 | 0.657 | 14 | 0.547 | 0.42  | N | 0.57 | SignalP-noTM |  |
| gj_188519451_gb_ACD57396_1 | 0.363 | 60 | 0.233 | 60 | 0.248 | 59 | 0.11  | 0.188 | N | 0.51 | SignalP-TM   |  |
| gj_188519452_gb_ACD57397_1 | 0.451 | 15 | 0.597 | 15 | 0.885 | 12 | 0.793 | 0.689 | Y | 0.57 | SignalP-noTM |  |
| gj_188519455_gb_ACD57400_1 | 0.125 | 29 | 0.113 | 29 | 0.158 | 42 | 0.091 | 0.102 | N | 0.57 | SignalP-noTM |  |
| gj_188519457_gb_ACD57402_1 | 0.162 | 20 | 0.177 | 20 | 0.416 | 1  | 0.232 | 0.203 | N | 0.57 | SignalP-noTM |  |
| gj_188519458_gb_ACD57403_1 | 0.414 | 24 | 0.64  | 24 | 0.995 | 14 | 0.974 | 0.797 | Y | 0.57 | SignalP-noTM |  |
| gj_188519469_gb_ACD57414_1 | 0.17  | 35 | 0.178 | 21 | 0.363 | 10 | 0.248 | 0.211 | N | 0.57 | SignalP-noTM |  |
| gj_188519474_gb_ACD57419_1 | 0.113 | 20 | 0.116 | 56 | 0.169 | 50 | 0.109 | 0.112 | N | 0.57 | SignalP-noTM |  |
| gj_188519475_gb_ACD57420_1 | 0.116 | 38 | 0.112 | 27 | 0.166 | 1  | 0.109 | 0.111 | N | 0.57 | SignalP-noTM |  |
| gj_188519478_gb_ACD57423_1 | 0.172 | 39 | 0.175 | 15 | 0.283 | 8  | 0.227 | 0.2   | N | 0.57 | SignalP-noTM |  |
| gj_188519479_gb_ACD57424_1 | 0.11  | 64 | 0.114 | 29 | 0.13  | 20 | 0.103 | 0.109 | N | 0.57 | SignalP-noTM |  |
| gj_188519480_gb_ACD57425_1 | 0.156 | 42 | 0.146 | 42 | 0.219 | 19 | 0.143 | 0.145 | N | 0.57 | SignalP-noTM |  |
| gj_188519481_gb_ACD57426_1 | 0.29  | 17 | 0.184 | 17 | 0.246 | 16 | 0.121 | 0.154 | N | 0.57 | SignalP-noTM |  |
| gj_188519482_gb_ACD57427_1 | 0.32  | 29 | 0.284 | 29 | 0.51  | 1  | 0.304 | 0.292 | N | 0.51 | SignalP-TM   |  |
| gj_188519483_gb_ACD57428_1 | 0.279 | 69 | 0.273 | 24 | 0.769 | 1  | 0.472 | 0.367 | N | 0.57 | SignalP-noTM |  |
| gj_188519487_gb_ACD57432_1 | 0.157 | 54 | 0.162 | 54 | 0.246 | 53 | 0.13  | 0.147 | N | 0.57 | SignalP-noTM |  |
| gj_188519490_gb_ACD57435_1 | 0.119 | 40 | 0.117 | 40 | 0.208 | 1  | 0.084 | 0.105 | N | 0.51 | SignalP-TM   |  |
| gj_188519491_gb_ACD57436_1 | 0.116 | 52 | 0.106 | 37 | 0.133 | 39 | 0.083 | 0.097 | N | 0.51 | SignalP-TM   |  |
| gj_188519492_gb_ACD57437_1 | 0.141 | 52 | 0.163 | 11 | 0.411 | 1  | 0.25  | 0.195 | N | 0.51 | SignalP-TM   |  |
| gj_188519493_gb_ACD57438_1 | 0.276 | 55 | 0.186 | 19 | 0.441 | 2  | 0.279 | 0.22  | N | 0.51 | SignalP-TM   |  |
| gj_188519494_gb_ACD57439_1 | 0.142 | 39 | 0.103 | 57 | 0.17  | 1  | 0.077 | 0.093 | N | 0.51 | SignalP-TM   |  |
| gj_188519495_gb_ACD57440_1 | 0.157 | 33 | 0.158 | 13 | 0.302 | 12 | 0.231 | 0.185 | N | 0.51 | SignalP-TM   |  |
| gj_188519497_gb_ACD57442_1 | 0.159 | 63 | 0.124 | 63 | 0.177 | 22 | 0.093 | 0.112 | N | 0.51 | SignalP-TM   |  |
| gj_188519498_gb_ACD57443_1 | 0.215 | 55 | 0.267 | 55 | 0.505 | 25 | 0.3   | 0.283 | N | 0.57 | SignalP-noTM |  |
| gj_188519499_gb_ACD57444_1 | 0.139 | 44 | 0.137 | 16 | 0.231 | 6  | 0.183 | 0.158 | N | 0.57 | SignalP-noTM |  |
| gj_188519500_gb_ACD57445_1 | 0.569 | 30 | 0.657 | 23 | 0.983 | 17 | 0.908 | 0.775 | Y | 0.57 | SignalP-noTM |  |
| gj_188519657_gb_ACD57602_1 | 0.144 | 23 | 0.122 | 50 | 0.179 | 46 | 0.093 | 0.111 | N | 0.51 | SignalP-TM   |  |
| gj_188519658_gb_ACD57603_1 | 0.718 | 18 | 0.75  | 18 | 0.896 | 16 | 0.766 | 0.758 | Y | 0.57 | SignalP-noTM |  |
| gj_188519659_gb_ACD57604_1 | 0.549 | 26 | 0.622 | 26 | 0.894 | 1  | 0.766 | 0.69  | Y | 0.57 | SignalP-noTM |  |
| gj_188519661_gb_ACD57606_1 | 0.156 | 42 | 0.146 | 42 | 0.219 | 19 | 0.143 | 0.145 | N | 0.57 | SignalP-noTM |  |
| gj_188519663_gb_ACD57608_1 | 0.105 | 44 | 0.132 | 11 | 0.268 | 1  | 0.166 | 0.148 | N | 0.57 | SignalP-noTM |  |
| gj_188519667_gb_ACD57612_1 | 0.107 | 27 | 0.128 | 11 | 0.215 | 5  | 0.176 | 0.146 | N | 0.51 | SignalP-TM   |  |
| gj_188519671_gb_ACD57616_1 | 0.133 | 30 | 0.209 | 14 | 0.557 | 10 | 0.436 | 0.316 | N | 0.57 | SignalP-noTM |  |

|          |          |          |          |                            |
|----------|----------|----------|----------|----------------------------|
| 0.23041  | 0.211318 | 0.297757 | 0.246495 | gj_188519690_gb_ACD57635_1 |
| 0.624103 | 0.040504 | 0.704123 | 0.456243 | gj_188519692_gb_ACD57637_1 |
| 0.196234 | 0.356405 | 0.208334 | 0.253658 | gj_188519694_gb_ACD57639_1 |
| 0.189233 | 0.932453 | 0.085489 | 0.402392 | gj_188519695_gb_ACD57640_1 |
| 0.148552 | 0.936494 | 0.171505 | 0.41885  | gj_188519698_gb_ACD57643_1 |
| 0.906954 | 0.979807 | 0.896042 | 0.927601 | gj_188519701_gb_ACD57646_1 |
| 0.478264 | 0.351603 | 0.62551  | 0.485126 | gj_188519707_gb_ACD57652_1 |
| 0.078928 | 0.002615 | 0.103123 | 0.060889 | gj_188519708_gb_ACD57653_1 |
| 0.485004 | 0.962421 | 0.759876 | 0.735767 | gj_188519710_gb_ACD57655_1 |
| 0.938255 | 0.913568 | 0.873471 | 0.908431 | gj_188519717_gb_ACD57662_1 |
| 0.161921 | 0.157493 | 0.416781 | 0.245398 | gj_188519727_gb_ACD57672_1 |
| 0.158691 | 0.027787 | 0.201974 | 0.129484 | gj_188519735_gb_ACD57680_1 |
| 0.112645 | 0.073237 | 0.139314 | 0.108399 | gj_188519736_gb_ACD57681_1 |
| 0.235232 | 0.966818 | 0.117533 | 0.439861 | gj_188519737_gb_ACD57682_1 |
| 0.621284 | 0.523982 | 0.745926 | 0.630397 | gj_188519738_gb_ACD57683_1 |
| 0.281709 | 0.180199 | 0.353658 | 0.271855 | gj_188519740_gb_ACD57685_1 |
| 0.868413 | 0.429228 | 0.880271 | 0.725971 | gj_188519756_gb_ACD57701_1 |
| 0.935966 | 0.49925  | 0.870794 | 0.768667 | gj_188519762_gb_ACD57707_1 |
| 0.345473 | 0.985571 | 0.521736 | 0.617593 | gj_188519763_gb_ACD57708_1 |
| 0.107936 | 0.05255  | 0.135755 | 0.098747 | gj_188519764_gb_ACD57709_1 |
| 0.293386 | 0.59556  | 0.362622 | 0.417189 | gj_188519767_gb_ACD57712_1 |
| 0.084324 | 0.003954 | 0.119098 | 0.069125 | gj_188519769_gb_ACD57714_1 |
| 0.541157 | 0.95996  | 0.726711 | 0.742609 | gj_188519771_gb_ACD57716_1 |
| 0.353658 | 0.975277 | 0.600608 | 0.643181 | gj_188519775_gb_ACD57720_1 |
| 0.082282 | 0.007013 | 0.11847  | 0.069248 | gj_188519778_gb_ACD57723_1 |
| 0.079366 | 0.000108 | 0.132619 | 0.070697 | gj_188519782_gb_ACD57727_1 |
| 0.772239 | 0.827641 | 0.832716 | 0.810865 | gj_188519784_gb_ACD57729_1 |
| 0.689546 | 0.781597 | 0.651809 | 0.707651 | gj_188519787_gb_ACD57732_1 |
| 0.21433  |          |          |          |                            |

|                           |       |    |       |    |       |    |       |       |   |      |              |
|---------------------------|-------|----|-------|----|-------|----|-------|-------|---|------|--------------|
| gi_188519672_gb_ACD576171 | 0.105 | 37 | 0.111 | 14 | 0.17  | 5  | 0.122 | 0.116 | N | 0.57 | SignalP-noTM |
| gi_188519673_gb_ACD576181 | 0.151 | 18 | 0.132 | 18 | 0.182 | 36 | 0.116 | 0.124 | N | 0.57 | SignalP-noTM |
| gi_188519674_gb_ACD576191 | 0.109 | 29 | 0.131 | 11 | 0.274 | 1  | 0.162 | 0.146 | N | 0.57 | SignalP-noTM |
| gi_188519675_gb_ACD576201 | 0.106 | 48 | 0.137 | 14 | 0.269 | 6  | 0.186 | 0.16  | N | 0.57 | SignalP-noTM |
| gi_188519678_gb_ACD576231 | 0.138 | 25 | 0.291 | 16 | 0.78  | 12 | 0.639 | 0.455 | N | 0.57 | SignalP-noTM |
| gi_188519679_gb_ACD576241 | 0.17  | 18 | 0.203 | 18 | 0.333 | 1  | 0.264 | 0.226 | N | 0.51 | SignalP-TM   |
| gi_188519680_gb_ACD576251 | 0.163 | 51 | 0.144 | 11 | 0.345 | 1  | 0.196 | 0.169 | N | 0.57 | SignalP-noTM |
| gi_188519681_gb_ACD576261 | 0.263 | 22 | 0.498 | 22 | 0.975 | 17 | 0.944 | 0.708 | Y | 0.57 | SignalP-noTM |
| gi_188519682_gb_ACD576271 | 0.811 | 22 | 0.88  | 22 | 0.966 | 18 | 0.952 | 0.914 | Y | 0.57 | SignalP-noTM |
| gi_188519683_gb_ACD576281 | 0.168 | 43 | 0.215 | 13 | 0.533 | 10 | 0.427 | 0.315 | N | 0.57 | SignalP-noTM |
| gi_188519686_gb_ACD576311 | 0.574 | 46 | 0.344 | 46 | 0.286 | 41 | 0.147 | 0.271 | N | 0.51 | SignalP-TM   |
| gi_188519689_gb_ACD576341 | 0.133 | 21 | 0.126 | 21 | 0.183 | 1  | 0.126 | 0.126 | N | 0.57 | SignalP-noTM |
| gi_188519690_gb_ACD576351 | 0.29  | 40 | 0.205 | 40 | 0.298 | 11 | 0.154 | 0.186 | N | 0.51 | SignalP-TM   |
| gi_188519692_gb_ACD576371 | 0.399 | 34 | 0.381 | 29 | 0.938 | 19 | 0.74  | 0.55  | N | 0.57 | SignalP-noTM |
| gi_188519694_gb_ACD576391 | 0.196 | 29 | 0.235 | 29 | 0.613 | 10 | 0.384 | 0.29  | N | 0.51 | SignalP-TM   |
| gi_188519695_gb_ACD576401 | 0.235 | 27 | 0.136 | 27 | 0.129 | 1  | 0.073 | 0.106 | N | 0.57 | SignalP-noTM |
| gi_188519698_gb_ACD576431 | 0.143 | 48 | 0.115 | 48 | 0.133 | 26 | 0.097 | 0.106 | N | 0.57 | SignalP-noTM |
| gi_188519701_gb_ACD576461 | 0.149 | 45 | 0.124 | 45 | 0.202 | 27 | 0.127 | 0.125 | N | 0.57 | SignalP-noTM |
| gi_188519707_gb_ACD576521 | 0.12  | 8  | 0.1   | 47 | 0.112 | 7  | 0.087 | 0.094 | N | 0.57 | SignalP-noTM |
| gi_188519708_gb_ACD576531 | 0.11  | 34 | 0.196 | 26 | 0.471 | 24 | 0.328 | 0.258 | N | 0.57 | SignalP-noTM |
| gi_188519710_gb_ACD576551 | 0.114 | 19 | 0.165 | 19 | 0.319 | 9  | 0.229 | 0.195 | N | 0.57 | SignalP-noTM |
| gi_188519717_gb_ACD576621 | 0.705 | 21 | 0.802 | 21 | 0.984 | 8  | 0.93  | 0.862 | Y | 0.57 | SignalP-noTM |
| gi_188519727_gb_ACD576721 | 0.115 | 22 | 0.116 | 11 | 0.173 | 1  | 0.134 | 0.124 | N | 0.57 | SignalP-noTM |
| gi_188519735_gb_ACD576801 | 0.141 | 20 | 0.132 | 20 | 0.268 | 1  | 0.136 | 0.134 | N | 0.57 | SignalP-noTM |
| gi_188519736_gb_ACD576811 | 0.127 | 67 | 0.125 | 53 | 0.199 | 49 | 0.121 | 0.124 | N | 0.51 | SignalP-TM   |
| gi_188519737_gb_ACD576821 | 0.136 | 35 | 0.125 | 35 | 0.161 | 11 | 0.117 | 0.121 | N | 0.57 | SignalP-noTM |
| gi_188519738_gb_ACD576831 | 0.323 | 25 | 0.557 | 25 | 0.992 | 18 | 0.958 | 0.745 | Y | 0.57 | SignalP-noTM |
| gi_188519740_gb_ACD576851 | 0.153 | 46 | 0.196 | 11 | 0.504 | 1  | 0.369 | 0.277 | N | 0.57 | SignalP-noTM |
| gi_188519756_gb_ACD577011 | 0.112 | 27 | 0.113 | 11 | 0.171 | 3  | 0.134 | 0.123 | N | 0.57 | SignalP-noTM |
| gi_188519762_gb_ACD577071 | 0.145 | 13 | 0.14  | 13 | 0.21  | 7  | 0.135 | 0.137 | N | 0.57 | SignalP-noTM |
| gi_188519763_gb_ACD577081 | 0.186 | 21 | 0.212 | 21 | 0.34  | 17 | 0.24  | 0.225 | N | 0.57 | SignalP-noTM |
| gi_188519764_gb_ACD577091 | 0.111 | 50 | 0.122 | 50 | 0.158 | 10 | 0.109 | 0.116 | N | 0.57 | SignalP-noTM |
| gi_188519767_gb_ACD577121 | 0.102 | 18 | 0.102 | 51 | 0.114 | 50 | 0.075 | 0.089 | N | 0.57 | SignalP-noTM |
| gi_188519769_gb_ACD577141 | 0.17  | 22 | 0.149 | 22 | 0.228 | 2  | 0.154 | 0.151 | N | 0.57 | SignalP-noTM |
| gi_188519771_gb_ACD577161 | 0.122 | 27 | 0.173 | 17 | 0.351 | 12 | 0.262 | 0.215 | N | 0.57 | SignalP-noTM |
| gi_188519775_gb_ACD577201 | 0.103 | 37 | 0.158 | 17 | 0.324 | 10 | 0.251 | 0.202 | N | 0.57 | SignalP-noTM |
| gi_188519778_gb_ACD577231 | 0.135 | 22 | 0.12  | 47 | 0.177 | 44 | 0.088 | 0.105 | N | 0.57 | SignalP-noTM |
| gi_188519782_gb_ACD577271 | 0.1   | 26 | 0.1   | 26 | 0.111 | 16 | 0.096 | 0.098 | N | 0.57 | SignalP-noTM |
| gi_188519784_gb_ACD577291 | 0.144 | 55 | 0.122 | 12 | 0.169 | 2  | 0.141 | 0.131 | N | 0.57 | SignalP-noTM |
| gi_188519787_gb_ACD577321 | 0.111 | 64 | 0.109 | 64 | 0.149 | 50 | 0.086 | 0.098 | N | 0.57 | SignalP-noTM |
| gi_188519790_gb_ACD577351 | 0.132 | 55 | 0.116 | 55 | 0.134 | 2  | 0.103 | 0.11  | N | 0.57 | SignalP-noTM |
| gi_188519791_gb_ACD577361 | 0.126 | 50 | 0.174 | 11 | 0.418 | 4  | 0.296 | 0.231 | N | 0.57 | SignalP-noTM |
| gi_188519793_gb_ACD577381 | 0.156 | 43 | 0.225 | 43 | 0.656 | 39 | 0.182 | 0.205 | N | 0.57 | SignalP-noTM |
| gi_188519794_gb_ACD577391 | 0.218 | 56 | 0.148 | 56 | 0.361 | 1  | 0.14  | 0.144 | N | 0.57 | SignalP-noTM |
| gi_188519795_gb_ACD577401 | 0.155 | 32 | 0.119 | 32 | 0.15  | 30 | 0.073 | 0.102 | N | 0.51 | SignalP-TM   |
| gi_188519798_gb_ACD577431 | 0.14  | 20 | 0.19  | 20 | 0.465 | 1  | 0.269 | 0.227 | N | 0.57 | SignalP-noTM |
| gi_188519799_gb_ACD577441 | 0.16  | 42 | 0.177 | 42 | 0.383 | 3  | 0.223 | 0.194 | N | 0.51 | SignalP-TM   |
| gi_188519803_gb_ACD577481 | 0.122 | 36 | 0.121 | 18 | 0.182 | 9  | 0.138 | 0.127 | N | 0.51 | SignalP-TM   |
| gi_188519804_gb_ACD577491 | 0.111 | 33 | 0.106 | 15 | 0.128 | 14 | 0.114 | 0.109 | N | 0.51 | SignalP-TM   |
| gi_188519805_gb_ACD577501 | 0.254 | 28 | 0.209 | 28 | 0.291 | 18 | 0.161 | 0.192 | N | 0.51 | SignalP-TM   |
| gi_188519806_gb_ACD577511 | 0.128 | 50 | 0.118 | 23 | 0.154 | 7  | 0.115 | 0.117 | N | 0.57 | SignalP-noTM |
| gi_188519807_gb_ACD577521 | 0.164 | 23 | 0.156 | 23 | 0.299 | 2  | 0.183 | 0.166 | N | 0.51 | SignalP-TM   |
| gi_188519808_gb_ACD577531 | 0.183 | 39 | 0.164 | 39 | 0.274 | 35 | 0.119 | 0.143 | N | 0.57 | SignalP-noTM |
| gi_188519812_gb_ACD577571 | 0.133 | 51 | 0.145 | 23 | 0.262 | 4  | 0.2   | 0.171 | N | 0.57 | SignalP-noTM |
| gi_188519813_gb_ACD577581 | 0.131 | 20 | 0.102 | 20 | 0.11  | 47 | 0.084 | 0.094 | N | 0.57 | SignalP-noTM |
| gi_188519814_gb_ACD577591 | 0.533 | 23 | 0.721 | 23 | 0.985 | 20 | 0.946 | 0.827 | Y | 0.57 | SignalP-noTM |
| gi_188519823_gb_ACD577681 | 0.137 | 60 | 0.116 | 60 | 0.118 | 49 | 0.094 | 0.105 | N | 0.57 | SignalP-noTM |
| gi_188519824_gb_ACD577691 | 0.114 | 43 | 0.112 | 11 | 0.168 | 1  | 0.121 | 0.116 | N | 0.57 | SignalP-noTM |
| gi_188519825_gb_ACD577701 | 0.185 | 31 | 0.125 | 31 | 0.232 | 2  | 0.09  | 0.108 | N | 0.57 | SignalP-noTM |
| gi_188519826_gb_ACD577711 | 0.14  | 65 | 0.115 | 65 | 0.129 | 1  | 0.087 | 0.102 | N | 0.57 | SignalP-noTM |
| gi_188519827_gb_ACD577721 | 0.555 | 26 | 0.654 | 26 | 0.909 | 12 | 0.824 | 0.734 | Y | 0.57 | SignalP-noTM |
| gi_188519828_gb_ACD577731 | 0.888 | 23 | 0.916 | 23 | 0.97  | 19 | 0.934 | 0.924 | Y | 0.57 | SignalP-noTM |
| gi_188519829_gb_ACD577741 | 0.128 | 20 | 0.101 | 70 | 0.128 | 10 | 0.08  | 0.091 | N | 0.57 | SignalP-noTM |
| gi_188519830_gb_ACD577751 | 0.115 | 52 | 0.114 | 11 | 0.183 | 1  | 0.122 | 0.118 | N | 0.57 | SignalP-noTM |
| gi_188519831_gb_ACD577761 | 0.152 | 27 | 0.175 | 17 | 0.374 | 8  | 0.263 | 0.207 | N | 0.51 | SignalP-TM   |
| gi_188519837_gb_ACD577821 | 0.156 | 21 | 0.136 | 11 | 0.211 | 4  | 0.188 | 0.16  | N | 0.57 | SignalP-noTM |
| gi_188519841_gb_ACD577861 | 0.166 | 19 | 0.123 | 32 | 0.143 | 29 | 0.096 | 0.11  | N | 0.57 | SignalP-noTM |
| gi_188519842_gb_ACD577871 | 0.179 | 28 | 0.138 | 28 | 0.183 | 26 | 0.105 | 0.122 | N | 0.57 | SignalP-noTM |
| gi_188519843_gb_ACD577881 | 0.151 | 64 | 0.12  | 64 | 0.14  | 4  | 0.097 | 0.109 | N | 0.57 | SignalP-noTM |
| gi_188519844_gb_ACD577891 | 0.151 | 26 | 0.24  | 19 | 0.707 | 17 | 0.433 | 0.331 | N | 0.57 | SignalP-noTM |
| gi_188519845_gb_ACD577901 | 0.819 | 26 | 0.892 | 26 | 0.986 | 22 | 0.952 | 0.92  | Y | 0.57 | SignalP-noTM |
| gi_188519846_gb_ACD577911 | 0.111 | 60 | 0.106 | 54 | 0.124 | 9  | 0.095 | 0.101 | N | 0.57 | SignalP-noTM |
| gi_188519847_gb_ACD577921 | 0.636 | 15 | 0.578 | 15 | 0.781 | 12 | 0.54  | 0.56  | N | 0.57 | SignalP-noTM |
| gi_188519849_gb_ACD577941 | 0.166 | 18 | 0.152 | 18 | 0.185 | 14 | 0.125 | 0.139 | N | 0.57 | SignalP-noTM |
| gi_188519850_gb_ACD577951 | 0.135 | 17 | 0.103 | 24 | 0.133 | 1  | 0.084 | 0.094 | N | 0.57 | SignalP-noTM |
| gi_188519851_gb_ACD577961 | 0.267 | 29 | 0.213 | 29 | 0.462 | 1  | 0.253 | 0.232 | N | 0.57 | SignalP-noTM |
| gi_188519852_gb_ACD577971 | 0.14  | 45 | 0.114 | 45 | 0.166 | 1  | 0.092 | 0.106 | N | 0.51 | SignalP-TM   |
| gi_188519858_gb_ACD578031 | 0.107 | 48 | 0.145 | 42 | 0.258 | 36 | 0.134 | 0.14  | N | 0.57 | SignalP-noTM |

|          |          |          |          |                           |
|----------|----------|----------|----------|---------------------------|
| 0.080247 | 0.001621 | 0.128532 | 0.070133 | gi_188519879_gb_ACD578241 |
| 0.49775  | 0.95064  | 0.402995 | 0.617128 | gi_188519880_gb_ACD578251 |
| 0.088588 | 0.042778 | 0.106786 | 0.079384 | gi_188519886_gb_ACD578311 |
| 0.073237 | 0.001861 | 0.106215 | 0.060438 | gi_188519887_gb_ACD578321 |
| 1.03958  | 0.050068 | 0.119098 | 0.091041 | gi_188519888_gb_ACD578331 |
| 0.100852 | 0.055777 | 0.128532 | 0.094987 | gi_188519889_gb_ACD578341 |
| 0.334033 | 0.033569 | 0.375897 | 0.247833 | gi_188519893_gb_ACD578381 |
| 0.920853 | 0.831879 | 0.900429 | 0.884387 | gi_188519894_gb_ACD578391 |
| 0.160704 | 0.077415 | 0.142217 | 0.126779 | gi_188519895_gb_ACD578401 |
| 0.268198 | 0.868413 | 0.186032 | 0.440214 | gi_188519898_gb_ACD578431 |
| 1.38955  | 0.063151 | 0.250115 | 0.15074  | gi_188519899_gb_ACD578441 |
| 1.90618  | 0.005236 | 0.260957 | 0.15227  | gi_188519905_gb_ACD578501 |
| 0.074675 | 0.047698 | 0.077629 | 0.066667 | gi_188519906_gb_ACD578511 |
| 0.173217 | 0.178873 | 0.263278 | 0.205123 | gi_188519908_gb_ACD578531 |
| 0.900698 | 0.956478 | 0.851827 | 0.903001 | gi_188519909_gb_ACD578541 |
| 0.175375 | 0.597005 | 0.146665 | 0.306348 | gi_188519914_gb_ACD578591 |
| 0.093046 | 0.445468 | 0.077629 | 0.205381 | gi_188519915_gb_ACD578601 |
| 0.159896 | 0.055462 | 0.186487 | 0.133948 | gi_188519916_gb_ACD578611 |
| 0.107072 | 0.067358 | 0.106786 | 0.093739 | gi_188519917_gb_ACD578621 |
| 0.161109 | 0.089599 | 0.149313 | 0.132127 | gi_188519918_gb_ACD578631 |
| 0.092289 | 0.024292 | 0.104518 | 0.0737   | gi_188519939_gb_ACD578841 |
| 0.447692 | 0.953779 | 0.639094 | 0.678458 | gi_188519968_gb_ACD579131 |
| 0.061745 | 0.029627 | 0.093299 | 0.061557 | gi_188519975_gb_ACD579201 |
| 0.390074 | 0.573709 | 0.380836 | 0.448206 | gi_188519976_gb_ACD579211 |
| 0.289051 | 0.331369 | 0.313028 | 0.311149 | gi_188519977_gb_ACD579221 |
| 0.86283  | 0.871804 | 0.810306 | 0.848313 | gi_188519978_gb_ACD579231 |
| 0.631812 | 0.731452 | 0.600608 | 0.654624 | gi_188519979_gb_ACD579241 |
| 0.9015   | 0.018762 | 0.9015   | 0.607254 | gi_188519980_gb_ACD579251 |
| 0.074468 | 0.046089 | 0.132964 | 0.084507 | gi_188519981_gb_ACD579261 |
| 0.711566 | 0.031493 | 0.770122 | 0.504394 | gi_188519982_gb_ACD579271 |
| 0.883397 | 0.270912 | 0.832716 | 0.662342 | gi_188519987_gb_ACD579321 |
| 0.102569 | 0.055777 | 0.131587 | 0.096644 | gi_188519988_gb_ACD579331 |
| 0.095349 | 0.019379 | 0.140759 | 0.085162 | gi_188519989_gb_ACD579341 |
| 0.136461 | 0.048    |          |          |                           |



|                            |       |    |       |    |       |    |       |       |   |      |              |
|----------------------------|-------|----|-------|----|-------|----|-------|-------|---|------|--------------|
| gi_188519859_gb_ACD57804.1 | 0.117 | 63 | 0.103 | 48 | 0.128 | 36 | 0.094 | 0.099 | N | 0.57 | SignalP-noTM |
| gi_188519863_gb_ACD57808.1 | 0.125 | 57 | 0.105 | 57 | 0.105 | 54 | 0.088 | 0.097 | N | 0.57 | SignalP-noTM |
| gi_188519864_gb_ACD57809.1 | 0.106 | 50 | 0.106 | 50 | 0.134 | 22 | 0.086 | 0.097 | N | 0.57 | SignalP-noTM |
| gi_188519865_gb_ACD57810.1 | 0.111 | 17 | 0.103 | 59 | 0.116 | 53 | 0.089 | 0.097 | N | 0.57 | SignalP-noTM |
| gi_188519868_gb_ACD57813.1 | 0.133 | 59 | 0.121 | 38 | 0.138 | 31 | 0.095 | 0.109 | N | 0.57 | SignalP-noTM |
| gi_188519869_gb_ACD57814.1 | 0.316 | 34 | 0.213 | 34 | 0.249 | 8  | 0.155 | 0.192 | N | 0.51 | SignalP-TM   |
| gi_188519872_gb_ACD57817.1 | 0.125 | 37 | 0.106 | 37 | 0.126 | 15 | 0.095 | 0.101 | N | 0.57 | SignalP-noTM |
| gi_188519873_gb_ACD57818.1 | 0.163 | 24 | 0.15  | 33 | 0.239 | 31 | 0.139 | 0.145 | N | 0.57 | SignalP-noTM |
| gi_188519875_gb_ACD57820.1 | 0.115 | 22 | 0.146 | 13 | 0.28  | 9  | 0.215 | 0.178 | N | 0.57 | SignalP-noTM |
| gi_188519876_gb_ACD57821.1 | 0.122 | 67 | 0.127 | 11 | 0.253 | 1  | 0.145 | 0.135 | N | 0.57 | SignalP-noTM |
| gi_188519877_gb_ACD57822.1 | 0.229 | 65 | 0.162 | 36 | 0.261 | 33 | 0.172 | 0.166 | N | 0.57 | SignalP-noTM |
| gi_188519878_gb_ACD57823.1 | 0.136 | 25 | 0.156 | 22 | 0.232 | 14 | 0.167 | 0.161 | N | 0.57 | SignalP-noTM |
| gi_188519879_gb_ACD57824.1 | 0.125 | 26 | 0.114 | 26 | 0.146 | 25 | 0.098 | 0.107 | N | 0.57 | SignalP-noTM |
| gi_188519880_gb_ACD57825.1 | 0.121 | 55 | 0.176 | 50 | 0.437 | 41 | 0.173 | 0.175 | N | 0.57 | SignalP-noTM |
| gi_188519886_gb_ACD57831.1 | 0.119 | 26 | 0.097 | 69 | 0.102 | 66 | 0.072 | 0.085 | N | 0.57 | SignalP-noTM |
| gi_188519887_gb_ACD57832.1 | 0.197 | 34 | 0.173 | 34 | 0.201 | 42 | 0.147 | 0.161 | N | 0.57 | SignalP-noTM |
| gi_188519888_gb_ACD57833.1 | 0.126 | 33 | 0.141 | 36 | 0.306 | 35 | 0.14  | 0.141 | N | 0.57 | SignalP-noTM |
| gi_188519889_gb_ACD57834.1 | 0.391 | 62 | 0.189 | 62 | 0.12  | 48 | 0.088 | 0.142 | N | 0.57 | SignalP-noTM |
| gi_188519893_gb_ACD57838.1 | 0.102 | 59 | 0.112 | 18 | 0.17  | 10 | 0.11  | 0.111 | N | 0.57 | SignalP-noTM |
| gi_188519894_gb_ACD57839.1 | 0.161 | 32 | 0.187 | 32 | 0.346 | 29 | 0.2   | 0.191 | N | 0.51 | SignalP-TM   |
| gi_188519895_gb_ACD57840.1 | 0.133 | 27 | 0.131 | 16 | 0.232 | 11 | 0.162 | 0.146 | N | 0.57 | SignalP-noTM |
| gi_188519898_gb_ACD57843.1 | 0.128 | 56 | 0.146 | 56 | 0.204 | 46 | 0.139 | 0.143 | N | 0.57 | SignalP-noTM |
| gi_188519899_gb_ACD57844.1 | 0.227 | 42 | 0.156 | 42 | 0.256 | 5  | 0.123 | 0.144 | N | 0.51 | SignalP-TM   |
| gi_188519905_gb_ACD57850.1 | 0.142 | 23 | 0.151 | 11 | 0.375 | 1  | 0.214 | 0.18  | N | 0.57 | SignalP-noTM |
| gi_188519906_gb_ACD57851.1 | 0.105 | 53 | 0.1   | 31 | 0.112 | 22 | 0.075 | 0.088 | N | 0.57 | SignalP-noTM |
| gi_188519908_gb_ACD57853.1 | 0.144 | 23 | 0.217 | 21 | 0.58  | 2  | 0.387 | 0.28  | N | 0.51 | SignalP-TM   |
| gi_188519909_gb_ACD57854.1 | 0.129 | 23 | 0.118 | 40 | 0.164 | 32 | 0.104 | 0.111 | N | 0.57 | SignalP-noTM |
| gi_188519914_gb_ACD57859.1 | 0.124 | 25 | 0.22  | 11 | 0.578 | 1  | 0.483 | 0.344 | N | 0.57 | SignalP-noTM |
| gi_188519915_gb_ACD57860.1 | 0.189 | 25 | 0.157 | 25 | 0.382 | 1  | 0.161 | 0.159 | N | 0.57 | SignalP-noTM |
| gi_188519916_gb_ACD57861.1 | 0.194 | 41 | 0.194 | 41 | 0.337 | 37 | 0.148 | 0.173 | N | 0.57 | SignalP-noTM |
| gi_188519917_gb_ACD57862.1 | 0.106 | 52 | 0.106 | 32 | 0.123 | 26 | 0.095 | 0.1   | N | 0.57 | SignalP-noTM |
| gi_188519918_gb_ACD57863.1 | 0.184 | 60 | 0.114 | 60 | 0.163 | 10 | 0.098 | 0.12  | N | 0.57 | SignalP-noTM |
| gi_188519939_gb_ACD57884.1 | 0.107 | 33 | 0.107 | 58 | 0.125 | 48 | 0.103 | 0.105 | N | 0.57 | SignalP-noTM |
| gi_188519968_gb_ACD57913.1 | 0.111 | 36 | 0.144 | 11 | 0.292 | 3  | 0.21  | 0.175 | N | 0.57 | SignalP-noTM |
| gi_188519975_gb_ACD57920.1 | 0.115 | 39 | 0.114 | 11 | 0.243 | 3  | 0.125 | 0.119 | N | 0.57 | SignalP-noTM |
| gi_188519976_gb_ACD57921.1 | 0.136 | 45 | 0.112 | 45 | 0.172 | 1  | 0.091 | 0.102 | N | 0.57 | SignalP-noTM |
| gi_188519977_gb_ACD57922.1 | 0.15  | 33 | 0.122 | 39 | 0.18  | 44 | 0.09  | 0.107 | N | 0.57 | SignalP-noTM |
| gi_188519978_gb_ACD57923.1 | 0.129 | 53 | 0.14  | 53 | 0.198 | 44 | 0.107 | 0.124 | N | 0.57 | SignalP-noTM |
| gi_188519979_gb_ACD57924.1 | 0.14  | 34 | 0.161 | 42 | 0.357 | 33 | 0.131 | 0.147 | N | 0.57 | SignalP-noTM |
| gi_188519980_gb_ACD57925.1 | 0.273 | 33 | 0.294 | 33 | 0.594 | 18 | 0.335 | 0.313 | N | 0.57 | SignalP-noTM |
| gi_188519981_gb_ACD57926.1 | 0.11  | 6  | 0.095 | 69 | 0.115 | 1  | 0.08  | 0.088 | N | 0.57 | SignalP-noTM |
| gi_188519982_gb_ACD57927.1 | 0.131 | 43 | 0.205 | 11 | 0.512 | 1  | 0.418 | 0.305 | N | 0.57 | SignalP-noTM |
| gi_188519987_gb_ACD57932.1 | 0.306 | 27 | 0.488 | 22 | 0.961 | 20 | 0.893 | 0.678 | Y | 0.57 | SignalP-noTM |
| gi_188519988_gb_ACD57933.1 | 0.206 | 29 | 0.181 | 29 | 0.284 | 13 | 0.184 | 0.182 | N | 0.51 | SignalP-TM   |
| gi_188519989_gb_ACD57934.1 | 0.199 | 22 | 0.18  | 22 | 0.351 | 50 | 0.159 | 0.172 | N | 0.51 | SignalP-TM   |
| gi_188519990_gb_ACD57935.1 | 0.184 | 29 | 0.213 | 29 | 0.532 | 27 | 0.246 | 0.225 | N | 0.51 | SignalP-TM   |
| gi_188519993_gb_ACD57938.1 | 0.1   | 23 | 0.1   | 11 | 0.132 | 1  | 0.097 | 0.098 | N | 0.57 | SignalP-noTM |
| gi_188519994_gb_ACD57939.1 | 0.174 | 28 | 0.134 | 28 | 0.118 | 34 | 0.097 | 0.117 | N | 0.57 | SignalP-noTM |
| gi_188519995_gb_ACD57940.1 | 0.111 | 15 | 0.105 | 15 | 0.129 | 10 | 0.096 | 0.101 | N | 0.57 | SignalP-noTM |
| gi_188519996_gb_ACD57941.1 | 0.115 | 25 | 0.122 | 13 | 0.171 | 8  | 0.15  | 0.135 | N | 0.57 | SignalP-noTM |
| gi_188519997_gb_ACD57942.1 | 0.107 | 66 | 0.126 | 42 | 0.187 | 39 | 0.117 | 0.122 | N | 0.57 | SignalP-noTM |
| gi_188519998_gb_ACD57943.1 | 0.155 | 69 | 0.118 | 69 | 0.135 | 14 | 0.097 | 0.108 | N | 0.57 | SignalP-noTM |
| gi_188519999_gb_ACD57944.1 | 0.235 | 27 | 0.141 | 27 | 0.189 | 1  | 0.102 | 0.123 | N | 0.57 | SignalP-noTM |
| gi_188520005_gb_ACD57950.1 | 0.205 | 31 | 0.168 | 11 | 0.428 | 1  | 0.261 | 0.211 | N | 0.57 | SignalP-noTM |
| gi_188520006_gb_ACD57951.1 | 0.212 | 24 | 0.135 | 24 | 0.247 | 3  | 0.119 | 0.128 | N | 0.57 | SignalP-noTM |
| gi_188520007_gb_ACD57952.1 | 0.336 | 21 | 0.446 | 21 | 0.654 | 11 | 0.528 | 0.476 | N | 0.51 | SignalP-TM   |
| gi_188520008_gb_ACD57953.1 | 0.166 | 55 | 0.124 | 70 | 0.12  | 2  | 0.085 | 0.105 | N | 0.57 | SignalP-noTM |
| gi_188520010_gb_ACD57955.1 | 0.113 | 20 | 0.102 | 11 | 0.157 | 1  | 0.099 | 0.101 | N | 0.57 | SignalP-noTM |
| gi_188520012_gb_ACD57957.1 | 0.284 | 21 | 0.381 | 21 | 0.672 | 14 | 0.501 | 0.438 | N | 0.57 | SignalP-noTM |
| gi_188520019_gb_ACD57964.1 | 0.126 | 20 | 0.104 | 47 | 0.119 | 45 | 0.08  | 0.093 | N | 0.57 | SignalP-noTM |
| gi_188520022_gb_ACD57967.1 | 0.424 | 27 | 0.591 | 27 | 0.931 | 19 | 0.852 | 0.714 | Y | 0.57 | SignalP-noTM |
| gi_188520024_gb_ACD57969.1 | 0.424 | 27 | 0.591 | 27 | 0.931 | 19 | 0.852 | 0.714 | Y | 0.57 | SignalP-noTM |
| gi_188520027_gb_ACD57972.1 | 0.398 | 27 | 0.523 | 27 | 0.844 | 19 | 0.721 | 0.616 | Y | 0.57 | SignalP-noTM |
| gi_188520031_gb_ACD57976.1 | 0.398 | 27 | 0.523 | 27 | 0.844 | 19 | 0.721 | 0.616 | Y | 0.57 | SignalP-noTM |
| gi_188520041_gb_ACD57986.1 | 0.134 | 22 | 0.162 | 22 | 0.318 | 11 | 0.201 | 0.18  | N | 0.57 | SignalP-noTM |
| gi_188520043_gb_ACD57988.1 | 0.132 | 34 | 0.128 | 34 | 0.171 | 24 | 0.119 | 0.124 | N | 0.57 | SignalP-noTM |
| gi_188520044_gb_ACD57989.1 | 0.133 | 22 | 0.158 | 22 | 0.292 | 11 | 0.194 | 0.175 | N | 0.57 | SignalP-noTM |
| gi_188520048_gb_ACD57993.1 | 0.104 | 32 | 0.115 | 32 | 0.143 | 24 | 0.108 | 0.111 | N | 0.57 | SignalP-noTM |
| gi_188520049_gb_ACD57994.1 | 0.874 | 22 | 0.908 | 22 | 0.97  | 17 | 0.937 | 0.922 | Y | 0.57 | SignalP-noTM |
| gi_188520050_gb_ACD57995.1 | 0.138 | 27 | 0.126 | 27 | 0.195 | 38 | 0.109 | 0.118 | N | 0.57 | SignalP-noTM |
| gi_188520051_gb_ACD57996.1 | 0.162 | 10 | 0.105 | 44 | 0.113 | 41 | 0.087 | 0.097 | N | 0.57 | SignalP-noTM |
| gi_188520058_gb_ACD58003.1 | 0.141 | 21 | 0.133 | 21 | 0.18  | 3  | 0.137 | 0.135 | N | 0.57 | SignalP-noTM |
| gi_188520059_gb_ACD58004.1 | 0.155 | 34 | 0.127 | 34 | 0.156 | 4  | 0.105 | 0.117 | N | 0.57 | SignalP-noTM |
| gi_188520060_gb_ACD58005.1 | 0.146 | 35 | 0.127 | 35 | 0.22  | 39 | 0.106 | 0.117 | N | 0.57 | SignalP-noTM |
| gi_188520061_gb_ACD58006.1 | 0.112 | 19 | 0.113 | 11 | 0.215 | 1  | 0.118 | 0.115 | N | 0.51 | SignalP-TM   |
| gi_188520062_gb_ACD58007.1 | 0.185 | 34 | 0.211 | 14 | 0.518 | 11 | 0.447 | 0.298 | N | 0.51 | SignalP-TM   |
| gi_188520064_gb_ACD58009.1 | 0.108 | 48 | 0.103 | 48 | 0.139 | 6  | 0.103 | 0.103 | N | 0.57 | SignalP-noTM |
| gi_188520065_gb_ACD58010.1 | 0.24  | 26 | 0.168 | 26 | 0.261 | 1  | 0.112 | 0.142 | N | 0.57 | SignalP-noTM |

|          |          |          |          |                            |
|----------|----------|----------|----------|----------------------------|
| 0.129544 | 0.02408  | 0.144798 | 0.099474 | gi_188520098_gb_ACD58043.1 |
| 0.075508 | 0.039696 | 0.090052 | 0.068419 | gi_188520100_gb_ACD58045.1 |
| 0.213325 | 0.718291 | 0.181087 | 0.370901 | gi_188520101_gb_ACD58046.1 |
| 0.399392 | 0.965243 | 0.143687 | 0.502774 | gi_188520119_gb_ACD58064.1 |
| 0.922799 | 0.919309 | 0.866342 | 0.902817 | gi_188520120_gb_ACD58065.1 |
| 0.900429 | 0.875773 | 0.834795 | 0.870332 | gi_188520121_gb_ACD58066.1 |
| 0.77539  | 0.99351  | 0.689546 | 0.819482 | gi_188520122_gb_ACD58067.1 |
| 0.064949 | 0.002625 | 0.084556 | 0.05071  | gi_188520125_gb_ACD58070.1 |
| 0.120363 | 0.047698 | 0.173217 | 0.113759 | gi_188520126_gb_ACD58071.1 |
| 0.413667 | 0.891775 | 0.523982 | 0.609875 | gi_188520127_gb_ACD58072.1 |
| 0.723722 | 0.201491 | 0.683088 | 0.5361   | gi_188520129_gb_ACD58074.1 |
| 0.299004 | 0.053911 | 0.377306 | 0.240707 | gi_188520130_gb_ACD58075.1 |
| 0.098234 | 0.034959 | 0.255784 | 0.129659 | gi_188520136_gb_ACD58081.1 |
| 0.217891 | 0.064405 | 0.278081 | 0.186792 | gi_188520137_gb_ACD58082.1 |
| 0.259225 | 0.064044 | 0.259225 | 0.194165 | gi_188520138_gb_ACD58083.1 |
| 0.157493 | 0.03059  | 0.087384 | 0.091822 | gi_188520139_gb_ACD58084.1 |
| 0.083402 | 0.032233 | 0.112047 | 0.075894 | gi_188520280_gb_ACD58225.1 |
| 0.140397 | 0.076139 | 0.137525 | 0.11802  | gi_188520281_gb_ACD58226.1 |
| 0.144798 | 0.088588 | 0.17023  | 0.134539 | gi_188520282_gb_ACD58227.1 |
| 0.897155 | 0.96296  | 0.878361 | 0.912825 | gi_188520283_gb_ACD58228.1 |
| 0.129206 | 0.172787 | 0.075928 | 0.125974 | gi_188520284_gb_ACD58229.1 |
| 0.185579 | 0.941969 | 0.101744 | 0.409764 | gi_188520285_gb_ACD58230.1 |
| 0.161921 | 0.434381 | 0.079365 | 0.225222 | gi_188520287_gb_ACD58232.1 |
| 0.07024  | 0.00054  | 0.1065   | 0.059093 | gi_188520288_gb_ACD58233.1 |
| 0.130662 | 0.04229  | 0.203915 | 0.125589 | gi_188520289_gb_ACD58234.1 |
| 0.131244 | 0.06054  | 0.127527 | 0.106437 | gi_188520290_gb_ACD58235.1 |
| 0.427025 | 0.043647 | 0.488752 | 0.319808 | gi_188520291_gb_ACD58236.1 |
| 0.144427 | 0.448434 | 0.108225 | 0.233695 | gi_188520293_gb_ACD58238.1 |
| 0.825491 | 0.120045 | 0.787178 | 0.575751 | gi_188520301_gb_ACD58246.1 |
| 0.172359 | 0.23308  | 0.303434 | 0.236291 | gi_188520302_gb_ACD58247.1 |
| 0.619871 | 0.056733 | 0.597726 | 0.424777 | gi_528897473_gb_ACD58243.2 |
| 0.149313 | 0.065866 | 0.145916 | 0.120365 | gi_188520303_gb_ACD58248.1 |
| 0.146665 | 0.282925 | 0.150844 | 0.193478 | gi_188520304_gb_ACD58249.1 |
| 0.095609 | 0.1      |          |          |                            |

|                            |       |    |       |    |       |    |       |       |   |      |              |
|----------------------------|-------|----|-------|----|-------|----|-------|-------|---|------|--------------|
| gj_188520066_gb_ACD58011.1 | 0.385 | 43 | 0.308 | 43 | 0.523 | 37 | 0.268 | 0.289 | N | 0.57 | SignalP-noTM |
| gj_188520067_gb_ACD58012.1 | 0.109 | 50 | 0.137 | 12 | 0.261 | 4  | 0.188 | 0.161 | N | 0.57 | SignalP-noTM |
| gj_188520068_gb_ACD58013.1 | 0.060 | 24 | 0.137 | 13 | 0.265 | 10 | 0.191 | 0.162 | N | 0.57 | SignalP-noTM |
| gj_188520071_gb_ACD58016.1 | 0.115 | 22 | 0.146 | 13 | 0.28  | 9  | 0.215 | 0.178 | N | 0.57 | SignalP-noTM |
| gj_188520072_gb_ACD58017.1 | 0.738 | 25 | 0.761 | 25 | 0.963 | 21 | 0.83  | 0.794 | Y | 0.57 | SignalP-noTM |
| gj_188520073_gb_ACD58018.1 | 0.105 | 23 | 0.117 | 11 | 0.162 | 3  | 0.135 | 0.126 | N | 0.57 | SignalP-noTM |
| gj_188520080_gb_ACD58025.1 | 0.11  | 36 | 0.139 | 11 | 0.286 | 3  | 0.196 | 0.166 | N | 0.57 | SignalP-noTM |
| gj_188520081_gb_ACD58026.1 | 0.399 | 67 | 0.342 | 67 | 0.51  | 1  | 0.253 | 0.309 | N | 0.51 | SignalP-TM   |
| gj_188520092_gb_ACD58037.1 | 0.113 | 42 | 0.12  | 11 | 0.194 | 5  | 0.156 | 0.133 | N | 0.51 | SignalP-TM   |
| gj_188520094_gb_ACD58039.1 | 0.138 | 8  | 0.117 | 41 | 0.162 | 33 | 0.105 | 0.111 | N | 0.57 | SignalP-noTM |
| gj_188520095_gb_ACD58040.1 | 0.154 | 29 | 0.139 | 44 | 0.263 | 40 | 0.096 | 0.123 | N | 0.51 | SignalP-TM   |
| gj_188520097_gb_ACD58042.1 | 0.248 | 21 | 0.439 | 21 | 0.905 | 1  | 0.822 | 0.619 | Y | 0.57 | SignalP-noTM |
| gj_188520098_gb_ACD58043.1 | 0.275 | 18 | 0.412 | 18 | 0.732 | 14 | 0.617 | 0.508 | N | 0.57 | SignalP-noTM |
| gj_188520100_gb_ACD58045.1 | 0.126 | 29 | 0.144 | 49 | 0.438 | 40 | 0.102 | 0.124 | N | 0.57 | SignalP-noTM |
| gj_188520101_gb_ACD58046.1 | 0.116 | 26 | 0.13  | 26 | 0.204 | 25 | 0.133 | 0.131 | N | 0.51 | SignalP-TM   |
| gj_188520119_gb_ACD58064.1 | 0.145 | 23 | 0.273 | 11 | 0.895 | 4  | 0.797 | 0.52  | N | 0.57 | SignalP-noTM |
| gj_188520120_gb_ACD58065.1 | 0.241 | 21 | 0.46  | 21 | 0.942 | 14 | 0.896 | 0.665 | Y | 0.57 | SignalP-noTM |
| gj_188520121_gb_ACD58066.1 | 0.114 | 27 | 0.111 | 27 | 0.136 | 17 | 0.104 | 0.108 | N | 0.57 | SignalP-noTM |
| gj_188520122_gb_ACD58067.1 | 0.127 | 23 | 0.104 | 23 | 0.121 | 22 | 0.075 | 0.09  | N | 0.57 | SignalP-noTM |
| gj_188520125_gb_ACD58070.1 | 0.116 | 61 | 0.098 | 24 | 0.107 | 25 | 0.077 | 0.088 | N | 0.57 | SignalP-noTM |
| gj_188520126_gb_ACD58071.1 | 0.13  | 42 | 0.137 | 11 | 0.295 | 1  | 0.18  | 0.153 | N | 0.51 | SignalP-TM   |
| gj_188520127_gb_ACD58072.1 | 0.144 | 26 | 0.117 | 32 | 0.145 | 39 | 0.093 | 0.106 | N | 0.57 | SignalP-noTM |
| gj_188520129_gb_ACD58074.1 | 0.192 | 32 | 0.128 | 11 | 0.269 | 1  | 0.151 | 0.139 | N | 0.57 | SignalP-noTM |
| gj_188520130_gb_ACD58075.1 | 0.15  | 43 | 0.159 | 43 | 0.282 | 42 | 0.173 | 0.166 | N | 0.57 | SignalP-noTM |
| gj_188520136_gb_ACD58081.1 | 0.117 | 47 | 0.1   | 47 | 0.111 | 65 | 0.08  | 0.091 | N | 0.57 | SignalP-noTM |
| gj_188520137_gb_ACD58082.1 | 0.115 | 28 | 0.1   | 61 | 0.107 | 46 | 0.083 | 0.092 | N | 0.57 | SignalP-noTM |
| gj_188520138_gb_ACD58083.1 | 0.199 | 36 | 0.15  | 36 | 0.187 | 35 | 0.077 | 0.123 | N | 0.51 | SignalP-TM   |
| gj_188520139_gb_ACD58084.1 | 0.126 | 35 | 0.119 | 35 | 0.154 | 25 | 0.102 | 0.111 | N | 0.57 | SignalP-noTM |
| gj_188520280_gb_ACD58225.1 | 0.105 | 24 | 0.11  | 36 | 0.125 | 29 | 0.09  | 0.101 | N | 0.57 | SignalP-noTM |
| gj_188520281_gb_ACD58226.1 | 0.157 | 28 | 0.131 | 28 | 0.184 | 27 | 0.1   | 0.116 | N | 0.57 | SignalP-noTM |
| gj_188520282_gb_ACD58227.1 | 0.237 | 66 | 0.335 | 15 | 0.851 | 12 | 0.599 | 0.459 | N | 0.57 | SignalP-noTM |
| gj_188520283_gb_ACD58228.1 | 0.493 | 41 | 0.666 | 41 | 0.982 | 28 | 0.669 | 0.668 | Y | 0.57 | SignalP-noTM |
| gj_188520284_gb_ACD58229.1 | 0.177 | 35 | 0.12  | 14 | 0.163 | 5  | 0.14  | 0.129 | N | 0.57 | SignalP-noTM |
| gj_188520285_gb_ACD58230.1 | 0.101 | 40 | 0.111 | 54 | 0.144 | 50 | 0.09  | 0.101 | N | 0.57 | SignalP-noTM |
| gj_188520287_gb_ACD58232.1 | 0.136 | 27 | 0.134 | 27 | 0.232 | 34 | 0.14  | 0.137 | N | 0.57 | SignalP-noTM |
| gj_188520288_gb_ACD58233.1 | 0.106 | 27 | 0.105 | 53 | 0.14  | 43 | 0.086 | 0.096 | N | 0.57 | SignalP-noTM |
| gj_188520289_gb_ACD58234.1 | 0.178 | 20 | 0.116 | 20 | 0.147 | 53 | 0.083 | 0.1   | N | 0.57 | SignalP-noTM |
| gj_188520290_gb_ACD58235.1 | 0.104 | 70 | 0.103 | 26 | 0.134 | 1  | 0.102 | 0.102 | N | 0.57 | SignalP-noTM |
| gj_188520291_gb_ACD58236.1 | 0.118 | 44 | 0.101 | 44 | 0.11  | 47 | 0.072 | 0.088 | N | 0.57 | SignalP-noTM |
| gj_188520293_gb_ACD58238.1 | 0.147 | 47 | 0.161 | 11 | 0.322 | 2  | 0.255 | 0.205 | N | 0.57 | SignalP-noTM |
| gj_528897473_gb_ACD58243.2 | 0.116 | 66 | 0.12  | 58 | 0.201 | 1  | 0.109 | 0.115 | N | 0.57 | SignalP-noTM |
| gj_188520301_gb_ACD58246.1 | 0.116 | 66 | 0.12  | 58 | 0.201 | 1  | 0.109 | 0.115 | N | 0.57 | SignalP-noTM |
| gj_188520302_gb_ACD58247.1 | 0.155 | 53 | 0.164 | 36 | 0.367 | 2  | 0.202 | 0.178 | N | 0.51 | SignalP-TM   |
| gj_188520303_gb_ACD58248.1 | 0.544 | 43 | 0.51  | 43 | 0.811 | 39 | 0.264 | 0.419 | N | 0.51 | SignalP-TM   |
| gj_188520304_gb_ACD58249.1 | 0.136 | 30 | 0.165 | 30 | 0.448 | 1  | 0.201 | 0.178 | N | 0.51 | SignalP-TM   |
| gj_188520305_gb_ACD58250.1 | 0.159 | 20 | 0.137 | 20 | 0.254 | 2  | 0.15  | 0.142 | N | 0.51 | SignalP-TM   |
| gj_188520306_gb_ACD58251.1 | 0.257 | 30 | 0.266 | 23 | 0.688 | 4  | 0.462 | 0.338 | N | 0.51 | SignalP-TM   |
| gj_188520307_gb_ACD58252.1 | 0.14  | 20 | 0.105 | 58 | 0.137 | 49 | 0.084 | 0.098 | N | 0.51 | SignalP-TM   |
| gj_188520308_gb_ACD58253.1 | 0.155 | 23 | 0.161 | 23 | 0.221 | 9  | 0.174 | 0.166 | N | 0.51 | SignalP-TM   |
| gj_188520309_gb_ACD58254.1 | 0.656 | 25 | 0.758 | 25 | 0.967 | 10 | 0.894 | 0.822 | Y | 0.57 | SignalP-noTM |
| gj_188520310_gb_ACD58255.1 | 0.178 | 51 | 0.13  | 16 | 0.269 | 23 | 0.15  | 0.139 | N | 0.57 | SignalP-noTM |
| gj_188520311_gb_ACD58256.1 | 0.107 | 21 | 0.109 | 52 | 0.184 | 2  | 0.103 | 0.106 | N | 0.57 | SignalP-noTM |
| gj_188520312_gb_ACD58257.1 | 0.162 | 36 | 0.194 | 36 | 0.42  | 34 | 0.184 | 0.189 | N | 0.57 | SignalP-noTM |
| gj_188520313_gb_ACD58258.1 | 0.242 | 14 | 0.283 | 14 | 0.544 | 10 | 0.337 | 0.308 | N | 0.57 | SignalP-noTM |
| gj_188520314_gb_ACD58259.1 | 0.763 | 38 | 0.747 | 38 | 0.965 | 29 | 0.806 | 0.774 | Y | 0.57 | SignalP-noTM |
| gj_188520315_gb_ACD58260.1 | 0.158 | 39 | 0.127 | 39 | 0.192 | 38 | 0.088 | 0.113 | N | 0.51 | SignalP-TM   |
| gj_188520330_gb_ACD58275.1 | 0.225 | 21 | 0.182 | 21 | 0.237 | 1  | 0.158 | 0.171 | N | 0.57 | SignalP-noTM |
| gj_188520331_gb_ACD58276.1 | 0.126 | 8  | 0.123 | 12 | 0.236 | 7  | 0.154 | 0.137 | N | 0.57 | SignalP-noTM |
| gj_188520334_gb_ACD58279.1 | 0.178 | 20 | 0.172 | 20 | 0.384 | 2  | 0.188 | 0.178 | N | 0.51 | SignalP-TM   |
| gj_188520335_gb_ACD58280.1 | 0.126 | 35 | 0.144 | 11 | 0.274 | 3  | 0.206 | 0.173 | N | 0.57 | SignalP-noTM |
| gj_188520338_gb_ACD58283.1 | 0.122 | 58 | 0.115 | 11 | 0.218 | 1  | 0.122 | 0.118 | N | 0.51 | SignalP-TM   |
| gj_188520339_gb_ACD58284.1 | 0.127 | 39 | 0.179 | 39 | 0.366 | 31 | 0.223 | 0.195 | N | 0.51 | SignalP-TM   |
| gj_188520343_gb_ACD58288.1 | 0.234 | 10 | 0.126 | 12 | 0.309 | 8  | 0.157 | 0.141 | N | 0.57 | SignalP-noTM |
| gj_188520345_gb_ACD58290.1 | 0.111 | 37 | 0.109 | 31 | 0.172 | 1  | 0.103 | 0.106 | N | 0.57 | SignalP-noTM |
| gj_188520356_gb_ACD58301.1 | 0.324 | 35 | 0.185 | 35 | 0.157 | 31 | 0.081 | 0.136 | N | 0.57 | SignalP-noTM |
| gj_188520361_gb_ACD58306.1 | 0.111 | 23 | 0.098 | 49 | 0.107 | 40 | 0.076 | 0.088 | N | 0.57 | SignalP-noTM |
| gj_188520362_gb_ACD58307.1 | 0.133 | 37 | 0.113 | 37 | 0.149 | 36 | 0.101 | 0.107 | N | 0.57 | SignalP-noTM |
| gj_188520370_gb_ACD58315.1 | 0.111 | 13 | 0.132 | 13 | 0.188 | 6  | 0.156 | 0.144 | N | 0.57 | SignalP-noTM |
| gj_188520380_gb_ACD58325.1 | 0.1   | 38 | 0.12  | 11 | 0.227 | 1  | 0.132 | 0.126 | N | 0.57 | SignalP-noTM |
| gj_188520387_gb_ACD58332.1 | 0.127 | 28 | 0.123 | 12 | 0.206 | 7  | 0.158 | 0.14  | N | 0.57 | SignalP-noTM |
| gj_188520390_gb_ACD58335.1 | 0.138 | 19 | 0.178 | 11 | 0.465 | 1  | 0.297 | 0.234 | N | 0.57 | SignalP-noTM |
| gj_188520391_gb_ACD58336.1 | 0.105 | 38 | 0.1   | 12 | 0.109 | 8  | 0.102 | 0.101 | N | 0.57 | SignalP-noTM |
| gj_188520392_gb_ACD58337.1 | 0.124 | 43 | 0.163 | 11 | 0.429 | 1  | 0.242 | 0.2   | N | 0.57 | SignalP-noTM |
| gj_188520393_gb_ACD58338.1 | 0.298 | 23 | 0.515 | 23 | 0.944 | 14 | 0.903 | 0.697 | Y | 0.57 | SignalP-noTM |
| gj_188520394_gb_ACD58339.1 | 0.135 | 25 | 0.134 | 11 | 0.214 | 4  | 0.18  | 0.156 | N | 0.57 | SignalP-noTM |
| gj_188520395_gb_ACD58340.1 | 0.118 | 46 | 0.131 | 11 | 0.206 | 3  | 0.174 | 0.151 | N | 0.57 | SignalP-noTM |
| gj_188520396_gb_ACD58341.1 | 0.107 | 46 | 0.107 | 70 | 0.128 | 69 | 0.093 | 0.1   | N | 0.57 | SignalP-noTM |
| gj_188520397_gb_ACD58342.1 | 0.195 | 34 | 0.148 | 34 | 0.272 | 1  | 0.145 | 0.147 | N | 0.57 | SignalP-noTM |

|          |          |          |          |                            |
|----------|----------|----------|----------|----------------------------|
| 0.741351 | 0.925739 | 0.685033 | 0.784041 | gj_188520421_gb_ACD58366.1 |
| 0.116912 | 0.062797 | 0.161923 | 0.113877 | gj_188520422_gb_ACD58367.1 |
| 0.886452 | 0.999742 | 0.544879 | 0.810358 | gj_188520433_gb_ACD58378.1 |
| 0.793639 | 0.671284 | 0.828921 | 0.764615 | gj_188520440_gb_ACD58385.1 |
| 0.14517  | 0.485754 | 0.092793 | 0.241239 | gj_188520443_gb_ACD58388.1 |
| 0.139314 | 0.141486 | 0.130562 | 0.137121 | gj_188520449_gb_ACD58394.1 |
| 0.144056 | 0.042047 | 0.177994 | 0.121366 | gj_188520450_gb_ACD58395.1 |
| 0.862475 | 0.631114 | 0.774867 | 0.756152 | gj_188520453_gb_ACD58398.1 |
| 0.083402 | 0.041091 | 0.13193  | 0.085474 | gj_188520459_gb_ACD58404.1 |
| 0.115373 | 0.063506 | 0.135404 | 0.104761 | gj_188520460_gb_ACD58405.1 |
| 0.082716 | 0.016577 | 0.087145 | 0.062146 | gj_188520461_gb_ACD58406.1 |
| 0.1603   | 0.733216 | 0.116912 | 0.336809 | gj_188520462_gb_ACD58407.1 |
| 0.107647 | 0.001473 | 0.206361 | 0.105116 | gj_188520463_gb_ACD58408.1 |
| 0.518741 | 0.817574 | 0.458099 | 0.598138 | gj_188520464_gb_ACD58409.1 |
| 0.065498 | 0.023112 | 0.065681 | 0.05143  | gj_188520467_gb_ACD58412.1 |
| 0.105647 | 0.072024 | 0.080247 | 0.085973 | gj_188520468_gb_ACD58413.1 |
| 0.272693 | 0.004236 | 0.406609 | 0.227846 | gj_188520470_gb_ACD58415.1 |
| 0.14517  | 0.068498 | 0.284754 | 0.166141 | gj_188520471_gb_ACD58416.1 |
| 0.36749  | 0.976131 | 0.392933 | 0.578851 | gj_188520472_gb_ACD58417.1 |
| 0.147041 | 0.174078 | 0.233617 | 0.184912 | gj_188520473_gb_ACD58418.1 |
| 0.144427 | 0.004325 | 0.272099 | 0.140284 | gj_188520474_gb_ACD58419.1 |
| 0.353658 | 0.005508 | 0.467048 | 0.275405 | gj_188520475_gb_ACD58420.1 |
| 0.273885 | 0.763145 | 0.314967 | 0.450666 | gj_188520476_gb_ACD58421.1 |
| 0.123901 | 0.071425 | 0.24177  | 0.145699 | gj_188520477_gb_ACD58422.1 |
| 0.285978 | 0.07635  | 0.375897 | 0.246075 | gj_188520478_gb_ACD58423.1 |
| 0.522485 | 0.978647 | 0.697833 | 0.732988 | gj_188520479_gb_ACD58424.1 |
| 0.954438 | 0.899076 | 0.937203 | 0.930238 | gj_188520480_gb_ACD58425.1 |
| 0.227233 | 0.036934 | 0.528469 | 0.264212 | gj_188520482_gb_ACD58427.1 |
| 0.061399 | 0.033961 | 0.094319 | 0.063226 | gj_188520483_gb_ACD58428.1 |
| 0.887654 | 0.996905 | 0.823319 | 0.902626 | gj_188520484_gb_ACD58429.1 |
| 0.080468 | 0.000977 | 0.126529 | 0.069325 | gj_188520485_gb_ACD58430.1 |
| 0.300903 | 0.147001 | 0.290285 | 0.246076 | gj_188520486_gb_ACD58431.  |

|                            |       |    |       |    |       |    |       |       |   |      |              |
|----------------------------|-------|----|-------|----|-------|----|-------|-------|---|------|--------------|
| gj_188520400_gb_ACD58345_1 | 0.139 | 33 | 0.12  | 33 | 0.113 | 30 | 0.082 | 0.102 | N | 0.57 | SignalP-noTM |
| gj_188520402_gb_ACD58347_1 | 0.153 | 45 | 0.119 | 45 | 0.13  | 13 | 0.092 | 0.106 | N | 0.57 | SignalP-noTM |
| gj_188520403_gb_ACD58348_1 | 0.135 | 51 | 0.121 | 51 | 0.124 | 29 | 0.1   | 0.111 | N | 0.57 | SignalP-noTM |
| gj_188520404_gb_ACD58349_1 | 0.125 | 44 | 0.181 | 12 | 0.459 | 1  | 0.286 | 0.23  | N | 0.57 | SignalP-noTM |
| gj_188520405_gb_ACD58350_1 | 0.111 | 27 | 0.176 | 11 | 0.471 | 2  | 0.294 | 0.231 | N | 0.57 | SignalP-noTM |
| gj_188520407_gb_ACD58352_1 | 0.108 | 56 | 0.111 | 22 | 0.165 | 14 | 0.1   | 0.107 | N | 0.51 | SignalIP-TM  |
| gj_188520413_gb_ACD58358_1 | 0.176 | 33 | 0.148 | 33 | 0.218 | 32 | 0.111 | 0.131 | N | 0.57 | SignalP-noTM |
| gj_188520416_gb_ACD58361_1 | 0.133 | 46 | 0.107 | 46 | 0.115 | 45 | 0.087 | 0.098 | N | 0.57 | SignalP-noTM |
| gj_188520417_gb_ACD58362_1 | 0.3   | 21 | 0.525 | 21 | 0.952 | 14 | 0.899 | 0.701 | Y | 0.57 | SignalP-noTM |
| gj_188520418_gb_ACD58363_1 | 0.102 | 50 | 0.116 | 35 | 0.174 | 49 | 0.111 | 0.113 | N | 0.57 | SignalP-noTM |
| gj_188520419_gb_ACD58364_1 | 0.185 | 23 | 0.242 | 23 | 0.44  | 20 | 0.296 | 0.262 | N | 0.51 | SignalIP-TM  |
| gj_188520420_gb_ACD58365_1 | 0.168 | 61 | 0.125 | 61 | 0.165 | 37 | 0.094 | 0.111 | N | 0.57 | SignalP-noTM |
| gj_188520421_gb_ACD58366_1 | 0.208 | 48 | 0.176 | 48 | 0.299 | 30 | 0.174 | 0.175 | N | 0.51 | SignalIP-TM  |
| gj_188520422_gb_ACD58367_1 | 0.158 | 66 | 0.132 | 35 | 0.231 | 34 | 0.132 | 0.132 | N | 0.57 | SignalP-noTM |
| gj_188520433_gb_ACD58378_1 | 0.107 | 22 | 0.133 | 11 | 0.27  | 1  | 0.165 | 0.148 | N | 0.57 | SignalP-noTM |
| gj_188520440_gb_ACD58385_1 | 0.113 | 18 | 0.109 | 44 | 0.127 | 40 | 0.091 | 0.1   | N | 0.57 | SignalP-noTM |
| gj_188520443_gb_ACD58388_1 | 0.102 | 63 | 0.201 | 18 | 0.583 | 15 | 0.37  | 0.28  | N | 0.57 | SignalP-noTM |
| gj_188520449_gb_ACD58394_1 | 0.125 | 43 | 0.112 | 11 | 0.177 | 1  | 0.119 | 0.116 | N | 0.57 | SignalP-noTM |
| gj_188520450_gb_ACD58395_1 | 0.132 | 40 | 0.129 | 11 | 0.312 | 1  | 0.144 | 0.136 | N | 0.57 | SignalP-noTM |
| gj_188520453_gb_ACD58398_1 | 0.117 | 20 | 0.111 | 20 | 0.126 | 11 | 0.098 | 0.105 | N | 0.57 | SignalP-noTM |
| gj_188520459_gb_ACD58404_1 | 0.207 | 59 | 0.139 | 59 | 0.12  | 20 | 0.089 | 0.116 | N | 0.57 | SignalP-noTM |
| gj_188520460_gb_ACD58405_1 | 0.119 | 45 | 0.108 | 45 | 0.122 | 7  | 0.099 | 0.104 | N | 0.57 | SignalP-noTM |
| gj_188520461_gb_ACD58406_1 | 0.115 | 45 | 0.146 | 11 | 0.307 | 26 | 0.217 | 0.179 | N | 0.57 | SignalP-noTM |
| gj_188520462_gb_ACD58407_1 | 0.116 | 37 | 0.117 | 46 | 0.119 | 38 | 0.103 | 0.111 | N | 0.57 | SignalP-noTM |
| gj_188520463_gb_ACD58408_1 | 0.146 | 47 | 0.143 | 11 | 0.26  | 3  | 0.215 | 0.17  | N | 0.51 | SignalIP-TM  |
| gj_188520464_gb_ACD58409_1 | 0.11  | 56 | 0.105 | 11 | 0.164 | 2  | 0.11  | 0.107 | N | 0.57 | SignalP-noTM |
| gj_188520467_gb_ACD58412_1 | 0.12  | 21 | 0.107 | 48 | 0.142 | 1  | 0.092 | 0.1   | N | 0.57 | SignalP-noTM |
| gj_188520468_gb_ACD58413_1 | 0.108 | 21 | 0.112 | 51 | 0.147 | 46 | 0.093 | 0.103 | N | 0.57 | SignalP-noTM |
| gj_188520470_gb_ACD58415_1 | 0.252 | 49 | 0.305 | 20 | 0.478 | 11 | 0.357 | 0.33  | N | 0.57 | SignalP-noTM |
| gj_188520471_gb_ACD58416_1 | 0.295 | 40 | 0.288 | 40 | 0.42  | 37 | 0.276 | 0.284 | N | 0.51 | SignalIP-TM  |
| gj_188520472_gb_ACD58417_1 | 0.159 | 17 | 0.219 | 17 | 0.453 | 1  | 0.326 | 0.269 | N | 0.57 | SignalP-noTM |
| gj_188520473_gb_ACD58418_1 | 0.451 | 23 | 0.347 | 23 | 0.479 | 2  | 0.316 | 0.336 | N | 0.51 | SignalIP-TM  |
| gj_188520474_gb_ACD58419_1 | 0.12  | 25 | 0.134 | 13 | 0.252 | 4  | 0.18  | 0.156 | N | 0.57 | SignalP-noTM |
| gj_188520475_gb_ACD58420_1 | 0.154 | 40 | 0.164 | 16 | 0.297 | 7  | 0.237 | 0.191 | N | 0.51 | SignalIP-TM  |
| gj_188520476_gb_ACD58421_1 | 0.155 | 42 | 0.145 | 42 | 0.21  | 19 | 0.138 | 0.141 | N | 0.57 | SignalP-noTM |
| gj_188520477_gb_ACD58422_1 | 0.129 | 18 | 0.181 | 11 | 0.512 | 1  | 0.315 | 0.231 | N | 0.51 | SignalIP-TM  |
| gj_188520478_gb_ACD58423_1 | 0.64  | 18 | 0.562 | 18 | 0.751 | 15 | 0.463 | 0.515 | N | 0.57 | SignalP-noTM |
| gj_188520479_gb_ACD58424_1 | 0.147 | 26 | 0.11  | 26 | 0.142 | 5  | 0.095 | 0.103 | N | 0.57 | SignalP-noTM |
| gj_188520480_gb_ACD58425_1 | 0.162 | 41 | 0.171 | 41 | 0.255 | 32 | 0.138 | 0.155 | N | 0.57 | SignalP-noTM |
| gj_188520482_gb_ACD58427_1 | 0.156 | 36 | 0.128 | 36 | 0.208 | 2  | 0.11  | 0.12  | N | 0.57 | SignalP-noTM |
| gj_188520483_gb_ACD58428_1 | 0.106 | 64 | 0.1   | 36 | 0.106 | 25 | 0.083 | 0.092 | N | 0.57 | SignalP-noTM |
| gj_188520484_gb_ACD58429_1 | 0.134 | 24 | 0.157 | 11 | 0.34  | 5  | 0.251 | 0.201 | N | 0.57 | SignalP-noTM |
| gj_188520485_gb_ACD58430_1 | 0.165 | 58 | 0.133 | 58 | 0.154 | 53 | 0.084 | 0.11  | N | 0.57 | SignalP-noTM |
| gj_188520486_gb_ACD58431_1 | 0.39  | 54 | 0.222 | 54 | 0.229 | 41 | 0.092 | 0.161 | N | 0.57 | SignalP-noTM |
| gj_188520487_gb_ACD58432_1 | 0.117 | 48 | 0.166 | 19 | 0.353 | 10 | 0.253 | 0.207 | N | 0.57 | SignalP-noTM |
| gj_188520488_gb_ACD58433_1 | 0.129 | 64 | 0.128 | 64 | 0.187 | 63 | 0.086 | 0.112 | N | 0.51 | SignalIP-TM  |
| gj_188520489_gb_ACD58434_1 | 0.174 | 26 | 0.147 | 26 | 0.224 | 8  | 0.145 | 0.146 | N | 0.51 | SignalIP-TM  |
| gj_188520492_gb_ACD58437_1 | 0.141 | 45 | 0.162 | 45 | 0.331 | 34 | 0.143 | 0.153 | N | 0.57 | SignalP-noTM |
| gj_188520493_gb_ACD58438_1 | 0.728 | 25 | 0.8   | 25 | 0.949 | 9  | 0.906 | 0.85  | Y | 0.57 | SignalP-noTM |
| gj_188520494_gb_ACD58439_1 | 0.814 | 24 | 0.89  | 24 | 0.987 | 11 | 0.968 | 0.927 | Y | 0.57 | SignalP-noTM |
| gj_188520495_gb_ACD58440_1 | 0.21  | 38 | 0.166 | 24 | 0.398 | 19 | 0.217 | 0.185 | N | 0.51 | SignalIP-TM  |
| gj_188520496_gb_ACD58441_1 | 0.571 | 32 | 0.622 | 32 | 0.9   | 24 | 0.707 | 0.662 | Y | 0.57 | SignalP-noTM |
| gj_188520497_gb_ACD58442_1 | 0.426 | 32 | 0.615 | 18 | 0.976 | 12 | 0.923 | 0.759 | Y | 0.57 | SignalP-noTM |
| gj_188520499_gb_ACD58444_1 | 0.133 | 22 | 0.168 | 22 | 0.33  | 11 | 0.21  | 0.188 | N | 0.57 | SignalP-noTM |
| gj_188520500_gb_ACD58445_1 | 0.104 | 33 | 0.108 | 33 | 0.119 | 21 | 0.084 | 0.096 | N | 0.57 | SignalP-noTM |
| gj_188520501_gb_ACD58446_1 | 0.118 | 63 | 0.11  | 53 | 0.122 | 45 | 0.085 | 0.099 | N | 0.57 | SignalP-noTM |
| gj_188520505_gb_ACD58450_1 | 0.122 | 47 | 0.113 | 25 | 0.144 | 1  | 0.102 | 0.108 | N | 0.57 | SignalP-noTM |
| gj_188520506_gb_ACD58451_1 | 0.167 | 38 | 0.138 | 38 | 0.169 | 2  | 0.125 | 0.132 | N | 0.57 | SignalP-noTM |
| gj_188520511_gb_ACD58456_1 | 0.122 | 47 | 0.113 | 25 | 0.144 | 1  | 0.102 | 0.108 | N | 0.57 | SignalP-noTM |
| gj_188520520_gb_ACD58465_1 | 0.115 | 22 | 0.108 | 27 | 0.158 | 19 | 0.097 | 0.103 | N | 0.57 | SignalP-noTM |
| gj_188520524_gb_ACD58469_1 | 0.804 | 29 | 0.871 | 29 | 0.971 | 25 | 0.93  | 0.899 | Y | 0.57 | SignalP-noTM |
| gj_188520525_gb_ACD58470_1 | 0.212 | 21 | 0.165 | 21 | 0.179 | 1  | 0.135 | 0.151 | N | 0.57 | SignalP-noTM |
| gj_188520526_gb_ACD58471_1 | 0.121 | 58 | 0.126 | 14 | 0.206 | 7  | 0.164 | 0.14  | N | 0.51 | SignalIP-TM  |
| gj_188520527_gb_ACD58472_1 | 0.14  | 29 | 0.156 | 18 | 0.311 | 11 | 0.19  | 0.172 | N | 0.57 | SignalP-noTM |
| gj_188520532_gb_ACD58477_1 | 0.119 | 42 | 0.128 | 50 | 0.196 | 46 | 0.11  | 0.12  | N | 0.57 | SignalP-noTM |
| gj_188520533_gb_ACD58478_1 | 0.147 | 40 | 0.139 | 13 | 0.251 | 4  | 0.171 | 0.151 | N | 0.51 | SignalIP-TM  |
| gj_188520534_gb_ACD58479_1 | 0.645 | 20 | 0.746 | 20 | 0.916 | 7  | 0.869 | 0.804 | Y | 0.57 | SignalP-noTM |
| gj_188520535_gb_ACD58480_1 | 0.174 | 19 | 0.126 | 19 | 0.144 | 18 | 0.093 | 0.11  | N | 0.57 | SignalP-noTM |
| gj_188520536_gb_ACD58481_1 | 0.123 | 7  | 0.133 | 14 | 0.335 | 6  | 0.177 | 0.154 | N | 0.57 | SignalP-noTM |
| gj_188520540_gb_ACD58485_1 | 0.136 | 27 | 0.112 | 35 | 0.16  | 3  | 0.104 | 0.108 | N | 0.57 | SignalP-noTM |
| gj_188520541_gb_ACD58486_1 | 0.189 | 31 | 0.179 | 31 | 0.272 | 13 | 0.187 | 0.182 | N | 0.51 | SignalIP-TM  |
| gj_188520542_gb_ACD58487_1 | 0.308 | 40 | 0.211 | 19 | 0.393 | 14 | 0.293 | 0.241 | N | 0.51 | SignalIP-TM  |
| gj_188520543_gb_ACD58488_1 | 0.106 | 42 | 0.1   | 31 | 0.115 | 13 | 0.087 | 0.094 | N | 0.57 | SignalP-noTM |
| gj_188520545_gb_ACD58490_1 | 0.15  | 31 | 0.126 | 31 | 0.173 | 27 | 0.076 | 0.103 | N | 0.57 | SignalP-noTM |
| gj_188520551_gb_ACD58496_1 | 0.119 | 27 | 0.18  | 12 | 0.39  | 4  | 0.326 | 0.234 | N | 0.51 | SignalIP-TM  |
| gj_188520552_gb_ACD58497_1 | 0.23  | 36 | 0.178 | 36 | 0.271 | 35 | 0.128 | 0.155 | N | 0.57 | SignalP-noTM |
| gj_188520553_gb_ACD58498_1 | 0.11  | 32 | 0.11  | 43 | 0.113 | 1  | 0.091 | 0.103 | N | 0.51 | SignalIP-TM  |
| gj_188520554_gb_ACD58499_1 | 0.108 | 40 | 0.109 | 40 | 0.137 | 39 | 0.093 | 0.101 | N | 0.57 | SignalP-noTM |

|          |          |          |          |                            |
|----------|----------|----------|----------|----------------------------|
| 0.105364 | 0.134703 | 0.123901 | 0.121323 | gj_188520586_gb_ACD58531_1 |
| 0.9512   | 0.957467 | 0.848    | 0.918889 | gj_188520587_gb_ACD58532_1 |
| 0.958909 | 0.999755 | 0.909702 | 0.956122 | gj_188520600_gb_ACD58545_1 |
| 0.093046 | 0.028278 | 0.112946 | 0.07809  | gj_188520602_gb_ACD58547_1 |
| 0.861404 | 0.798991 | 0.827213 | 0.829203 | gj_188520603_gb_ACD58548_1 |
| 0.61562  | 0.983617 | 0.715246 | 0.771494 | gj_188520607_gb_ACD58552_1 |
| 0.214333 | 0.180199 | 0.154335 | 0.182956 | gj_188520608_gb_ACD58553_1 |
| 0.119729 | 0.069074 | 0.076888 | 0.088597 | gj_188520609_gb_ACD58554_1 |
| 0.191545 | 0.234693 | 0.247312 | 0.224517 | gj_188520616_gb_ACD58561_1 |
| 0.113247 | 0.014818 | 0.152775 | 0.093613 | gj_188520617_gb_ACD58562_1 |
| 0.232009 | 0.079805 | 0.258075 | 0.189963 | gj_188520618_gb_ACD58563_1 |
| 0.105081 | 0.054681 | 0.159494 | 0.106419 | gj_188520620_gb_ACD58565_1 |
| 0.171079 | 0.010477 | 0.234693 | 0.13875  | gj_188520621_gb_ACD58566_1 |
| 0.134703 | 0.342089 | 0.102845 | 0.193212 | gj_188520622_gb_ACD58567_1 |
| 0.237398 | 0.072024 | 0.337378 | 0.2156   | gj_188520623_gb_ACD58568_1 |
| 0.265612 | 0.045564 | 0.339393 | 0.216856 | gj_188520626_gb_ACD58571_1 |
| 0.103679 | 0.020918 | 0.113247 | 0.079281 | gj_188520629_gb_ACD58574_1 |
| 0.17023  | 0.024941 | 0.243977 | 0.146383 | gj_188520632_gb_ACD58577_1 |
| 0.943107 | 0.999817 | 0.817127 | 0.920017 | gj_188520633_gb_ACD58578_1 |
| 0.137525 | 0.048108 | 0.120999 | 0.102211 | gj_188520635_gb_ACD58580_1 |
| 0.830616 | 0.999941 | 0.570772 | 0.800443 | gj_188520637_gb_ACD58582_1 |
| 0.138596 | 0.267959 | 0.117845 | 0.1748   | gj_188520640_gb_ACD58585_1 |
| 0.920415 | 0.999568 | 0.879001 | 0.932995 | gj_188520647_gb_ACD58592_1 |
| 0.962094 | 0.999852 | 0.907711 | 0.956552 | gj_188520650_gb_ACD58595_1 |
| 0.784654 | 0.226181 | 0.806121 | 0.605652 | gj_188520653_gb_ACD58598_1 |
| 0.109681 | 0.045174 | 0.114762 | 0.098972 | gj_188520654_gb_ACD58599_1 |
| 0.260957 | 0.085021 | 0.250115 | 0.198698 | gj_188520657_gb_ACD58602_1 |
| 0.139674 | 0.035571 | 0.219943 | 0.131729 | gj_188520659_gb_ACD58604_1 |
| 0.93738  | 0.997958 | 0.851827 | 0.929055 | gj_188520661_gb_ACD58606_1 |
| 0.107072 | 0.036934 | 0.143687 | 0.095898 | gj_188520662_gb_ACD58607_1 |
| 0.100381 | 0.07806  | 0.171079 | 0.116507 | gj_188520665_gb_ACD58610_1 |
| 0.063151 | 0.037255 | 0.114762 | 0.071723 | gj_188520666_gb_ACD58611_1 |
| 0        |          |          |          |                            |

|                            |       |    |       |    |       |    |       |       |   |      |              |
|----------------------------|-------|----|-------|----|-------|----|-------|-------|---|------|--------------|
| gj_188520557_gb_ACD58502.1 | 0.107 | 36 | 0.137 | 11 | 0.253 | 5  | 0.205 | 0.162 | N | 0.51 | SignalP-TM   |
| gj_188520565_gb_ACD58510.1 | 0.104 | 37 | 0.118 | 37 | 0.177 | 33 | 0.111 | 0.114 | N | 0.57 | SignalP-noTM |
| gj_188520567_gb_ACD58512.1 | 0.033 | 29 | 0.101 | 11 | 0.204 | 1  | 0.086 | 0.094 | N | 0.57 | SignalP-noTM |
| gj_188520568_gb_ACD58513.1 | 0.43  | 40 | 0.644 | 40 | 0.989 | 29 | 0.783 | 0.709 | Y | 0.57 | SignalP-noTM |
| gj_188520569_gb_ACD58514.1 | 0.244 | 34 | 0.107 | 14 | 0.144 | 5  | 0.112 | 0.109 | N | 0.57 | SignalP-noTM |
| gj_188520570_gb_ACD58515.1 | 0.845 | 20 | 0.883 | 20 | 0.956 | 16 | 0.915 | 0.898 | Y | 0.57 | SignalP-noTM |
| gj_188520571_gb_ACD58516.1 | 0.121 | 21 | 0.137 | 11 | 0.32  | 1  | 0.178 | 0.156 | N | 0.57 | SignalP-noTM |
| gj_188520572_gb_ACD58517.1 | 0.182 | 23 | 0.125 | 23 | 0.114 | 55 | 0.084 | 0.106 | N | 0.57 | SignalP-noTM |
| gj_188520573_gb_ACD58518.1 | 0.105 | 59 | 0.101 | 59 | 0.112 | 47 | 0.084 | 0.093 | N | 0.57 | SignalP-noTM |
| gj_188520574_gb_ACD58519.1 | 0.132 | 51 | 0.118 | 51 | 0.168 | 1  | 0.111 | 0.115 | N | 0.57 | SignalP-noTM |
| gj_188520575_gb_ACD58520.1 | 0.134 | 49 | 0.107 | 65 | 0.136 | 34 | 0.091 | 0.101 | N | 0.51 | SignalP-TM   |
| gj_188520576_gb_ACD58521.1 | 0.117 | 32 | 0.105 | 17 | 0.127 | 14 | 0.109 | 0.107 | N | 0.57 | SignalP-noTM |
| gj_188520586_gb_ACD58531.1 | 0.214 | 17 | 0.235 | 17 | 0.46  | 16 | 0.272 | 0.253 | N | 0.57 | SignalP-noTM |
| gj_188520587_gb_ACD58532.1 | 0.107 | 42 | 0.107 | 42 | 0.123 | 39 | 0.086 | 0.097 | N | 0.57 | SignalP-noTM |
| gj_188520600_gb_ACD58545.1 | 0.128 | 43 | 0.104 | 43 | 0.145 | 2  | 0.083 | 0.094 | N | 0.57 | SignalP-noTM |
| gj_188520602_gb_ACD58547.1 | 0.111 | 63 | 0.103 | 63 | 0.122 | 50 | 0.087 | 0.095 | N | 0.57 | SignalP-noTM |
| gj_188520603_gb_ACD58548.1 | 0.164 | 21 | 0.22  | 21 | 0.607 | 2  | 0.38  | 0.295 | N | 0.57 | SignalP-noTM |
| gj_188520607_gb_ACD58552.1 | 0.1   | 21 | 0.098 | 40 | 0.116 | 14 | 0.093 | 0.096 | N | 0.57 | SignalP-noTM |
| gj_188520608_gb_ACD58553.1 | 0.11  | 32 | 0.119 | 11 | 0.192 | 2  | 0.142 | 0.129 | N | 0.57 | SignalP-noTM |
| gj_188520609_gb_ACD58554.1 | 0.122 | 14 | 0.11  | 14 | 0.158 | 5  | 0.1   | 0.105 | N | 0.57 | SignalP-noTM |
| gj_188520616_gb_ACD58561.1 | 0.106 | 25 | 0.121 | 11 | 0.209 | 4  | 0.149 | 0.134 | N | 0.57 | SignalP-noTM |
| gj_188520617_gb_ACD58562.1 | 0.121 | 25 | 0.142 | 11 | 0.294 | 1  | 0.186 | 0.163 | N | 0.57 | SignalP-noTM |
| gj_188520618_gb_ACD58563.1 | 0.156 | 37 | 0.196 | 37 | 0.368 | 33 | 0.229 | 0.208 | N | 0.51 | SignalP-TM   |
| gj_188520620_gb_ACD58565.1 | 0.133 | 21 | 0.123 | 21 | 0.166 | 1  | 0.108 | 0.116 | N | 0.57 | SignalP-noTM |
| gj_188520621_gb_ACD58566.1 | 0.153 | 24 | 0.262 | 21 | 0.739 | 3  | 0.559 | 0.401 | N | 0.57 | SignalP-noTM |
| gj_188520622_gb_ACD58567.1 | 0.158 | 36 | 0.127 | 36 | 0.177 | 34 | 0.104 | 0.116 | N | 0.57 | SignalP-noTM |
| gj_188520623_gb_ACD58568.1 | 0.119 | 32 | 0.167 | 48 | 0.436 | 44 | 0.173 | 0.17  | N | 0.57 | SignalP-noTM |
| gj_188520626_gb_ACD58571.1 | 0.231 | 42 | 0.242 | 42 | 0.38  | 6  | 0.244 | 0.243 | N | 0.51 | SignalP-TM   |
| gj_188520629_gb_ACD58574.1 | 0.362 | 31 | 0.233 | 31 | 0.364 | 3  | 0.186 | 0.211 | N | 0.57 | SignalP-noTM |
| gj_188520632_gb_ACD58577.1 | 0.124 | 34 | 0.104 | 57 | 0.172 | 45 | 0.081 | 0.093 | N | 0.57 | SignalP-noTM |
| gj_188520633_gb_ACD58578.1 | 0.153 | 62 | 0.234 | 26 | 0.535 | 20 | 0.359 | 0.28  | N | 0.51 | SignalP-TM   |
| gj_188520635_gb_ACD58580.1 | 0.114 | 22 | 0.218 | 11 | 0.567 | 1  | 0.481 | 0.341 | N | 0.57 | SignalP-noTM |
| gj_188520637_gb_ACD58582.1 | 0.099 | 18 | 0.114 | 18 | 0.167 | 7  | 0.124 | 0.119 | N | 0.57 | SignalP-noTM |
| gj_188520640_gb_ACD58585.1 | 0.171 | 26 | 0.213 | 26 | 0.672 | 17 | 0.259 | 0.234 | N | 0.57 | SignalP-noTM |
| gj_188520647_gb_ACD58592.1 | 0.589 | 27 | 0.343 | 27 | 0.332 | 23 | 0.175 | 0.281 | N | 0.51 | SignalP-TM   |
| gj_188520650_gb_ACD58595.1 | 0.789 | 26 | 0.853 | 26 | 0.971 | 21 | 0.886 | 0.869 | Y | 0.57 | SignalP-noTM |
| gj_188520653_gb_ACD58598.1 | 0.118 | 65 | 0.181 | 11 | 0.43  | 3  | 0.33  | 0.251 | N | 0.57 | SignalP-noTM |
| gj_188520654_gb_ACD58599.1 | 0.108 | 48 | 0.105 | 58 | 0.136 | 6  | 0.103 | 0.104 | N | 0.57 | SignalP-noTM |
| gj_188520657_gb_ACD58602.1 | 0.117 | 37 | 0.105 | 37 | 0.098 | 31 | 0.076 | 0.091 | N | 0.57 | SignalP-noTM |
| gj_188520659_gb_ACD58604.1 | 0.126 | 34 | 0.142 | 34 | 0.209 | 33 | 0.114 | 0.129 | N | 0.57 | SignalP-noTM |
| gj_188520661_gb_ACD58606.1 | 0.169 | 30 | 0.321 | 19 | 0.827 | 13 | 0.738 | 0.517 | N | 0.57 | SignalP-noTM |
| gj_188520662_gb_ACD58607.1 | 0.108 | 58 | 0.1   | 67 | 0.114 | 2  | 0.086 | 0.093 | N | 0.57 | SignalP-noTM |
| gj_188520665_gb_ACD58610.1 | 0.116 | 34 | 0.124 | 34 | 0.207 | 30 | 0.113 | 0.12  | N | 0.51 | SignalP-TM   |
| gj_188520666_gb_ACD58611.1 | 0.24  | 18 | 0.125 | 18 | 0.125 | 34 | 0.07  | 0.099 | N | 0.57 | SignalP-noTM |
| gj_188520667_gb_ACD58612.1 | 0.139 | 38 | 0.135 | 38 | 0.204 | 2  | 0.131 | 0.133 | N | 0.57 | SignalP-noTM |
| gj_188520683_gb_ACD58628.1 | 0.236 | 23 | 0.226 | 23 | 0.39  | 32 | 0.224 | 0.225 | N | 0.51 | SignalP-TM   |
| gj_188520684_gb_ACD58629.1 | 0.162 | 30 | 0.122 | 30 | 0.149 | 34 | 0.075 | 0.105 | N | 0.51 | SignalP-TM   |
| gj_188520685_gb_ACD58630.1 | 0.226 | 32 | 0.146 | 32 | 0.184 | 60 | 0.087 | 0.124 | N | 0.51 | SignalP-TM   |
| gj_188520686_gb_ACD58631.1 | 0.145 | 26 | 0.164 | 11 | 0.352 | 3  | 0.279 | 0.206 | N | 0.51 | SignalP-TM   |
| gj_188520690_gb_ACD58635.1 | 0.146 | 44 | 0.141 | 44 | 0.191 | 42 | 0.092 | 0.118 | N | 0.57 | SignalP-noTM |
| gj_188520691_gb_ACD58636.1 | 0.156 | 42 | 0.146 | 42 | 0.219 | 19 | 0.143 | 0.145 | N | 0.57 | SignalP-noTM |
| gj_188520692_gb_ACD58637.1 | 0.137 | 20 | 0.18  | 11 | 0.428 | 2  | 0.322 | 0.247 | N | 0.57 | SignalP-noTM |
| gj_188520696_gb_ACD58641.1 | 0.248 | 29 | 0.441 | 29 | 0.934 | 20 | 0.85  | 0.633 | Y | 0.57 | SignalP-noTM |
| gj_188520697_gb_ACD58642.1 | 0.187 | 35 | 0.167 | 35 | 0.322 | 2  | 0.146 | 0.157 | N | 0.57 | SignalP-noTM |
| gj_188520703_gb_ACD58648.1 | 0.112 | 34 | 0.114 | 70 | 0.178 | 67 | 0.08  | 0.102 | N | 0.51 | SignalP-TM   |
| gj_188520704_gb_ACD58649.1 | 0.128 | 29 | 0.123 | 29 | 0.141 | 26 | 0.098 | 0.111 | N | 0.57 | SignalP-noTM |
| gj_528897476_gb_ACD58650.2 | 0.116 | 66 | 0.12  | 58 | 0.197 | 1  | 0.107 | 0.114 | N | 0.57 | SignalP-noTM |
| gj_188520711_gb_ACD58656.1 | 0.269 | 46 | 0.166 | 46 | 0.128 | 41 | 0.097 | 0.134 | N | 0.57 | SignalP-noTM |
| gj_188520717_gb_ACD58662.1 | 0.122 | 27 | 0.158 | 11 | 0.341 | 5  | 0.258 | 0.205 | N | 0.57 | SignalP-noTM |
| gj_188520718_gb_ACD58663.1 | 0.109 | 20 | 0.138 | 11 | 0.202 | 6  | 0.184 | 0.159 | N | 0.57 | SignalP-noTM |
| gj_188520720_gb_ACD58665.1 | 0.123 | 22 | 0.131 | 27 | 0.178 | 36 | 0.128 | 0.13  | N | 0.57 | SignalP-noTM |
| gj_188520806_gb_ACD58751.1 | 0.106 | 43 | 0.108 | 12 | 0.157 | 9  | 0.12  | 0.114 | N | 0.57 | SignalP-noTM |
| gj_188520807_gb_ACD58752.1 | 0.104 | 13 | 0.138 | 11 | 0.253 | 3  | 0.187 | 0.161 | N | 0.57 | SignalP-noTM |
| gj_188520815_gb_ACD58760.1 | 0.302 | 23 | 0.236 | 23 | 0.501 | 2  | 0.258 | 0.244 | N | 0.51 | SignalP-TM   |
| gj_188520816_gb_ACD58761.1 | 0.122 | 27 | 0.147 | 27 | 0.275 | 23 | 0.153 | 0.149 | N | 0.51 | SignalP-TM   |
| gj_188520817_gb_ACD58762.1 | 0.111 | 28 | 0.164 | 11 | 0.369 | 3  | 0.263 | 0.211 | N | 0.57 | SignalP-noTM |
| gj_188520818_gb_ACD58763.1 | 0.153 | 26 | 0.121 | 26 | 0.203 | 24 | 0.08  | 0.102 | N | 0.57 | SignalP-noTM |
| gj_188520819_gb_ACD58764.1 | 0.156 | 46 | 0.134 | 12 | 0.215 | 3  | 0.179 | 0.155 | N | 0.57 | SignalP-noTM |
| gj_188520820_gb_ACD58765.1 | 0.115 | 54 | 0.114 | 11 | 0.21  | 1  | 0.122 | 0.117 | N | 0.57 | SignalP-noTM |
| gj_188520823_gb_ACD58768.1 | 0.162 | 22 | 0.175 | 22 | 0.273 | 11 | 0.179 | 0.176 | N | 0.51 | SignalP-TM   |
| gj_188520824_gb_ACD58769.1 | 0.114 | 50 | 0.111 | 50 | 0.139 | 47 | 0.095 | 0.103 | N | 0.57 | SignalP-noTM |
| gj_188520825_gb_ACD58770.1 | 0.207 | 20 | 0.12  | 20 | 0.102 | 35 | 0.077 | 0.1   | N | 0.57 | SignalP-noTM |
| gj_188520828_gb_ACD58773.1 | 0.146 | 25 | 0.137 | 25 | 0.209 | 1  | 0.127 | 0.132 | N | 0.57 | SignalP-noTM |
| gj_188520829_gb_ACD58774.1 | 0.455 | 45 | 0.497 | 45 | 0.77  | 37 | 0.286 | 0.398 | N | 0.57 | SignalP-noTM |
| gj_188520833_gb_ACD58778.1 | 0.118 | 27 | 0.143 | 11 | 0.26  | 1  | 0.198 | 0.169 | N | 0.57 | SignalP-noTM |
| gj_188520835_gb_ACD58780.1 | 0.153 | 26 | 0.144 | 26 | 0.278 | 18 | 0.149 | 0.147 | N | 0.57 | SignalP-noTM |
| gj_188520836_gb_ACD58781.1 | 0.121 | 24 | 0.242 | 24 | 0.668 | 13 | 0.514 | 0.37  | N | 0.57 | SignalP-noTM |
| gj_188520839_gb_ACD58784.1 | 0.151 | 32 | 0.126 | 32 | 0.163 | 31 | 0.091 | 0.109 | N | 0.57 | SignalP-noTM |

|          |          |          |          |                            |
|----------|----------|----------|----------|----------------------------|
| 0.674586 | 0.601328 | 0.752688 | 0.676201 | gj_188520873_gb_ACD58818.1 |
| 0.939289 | 0.999681 | 0.926763 | 0.955244 | gj_188520876_gb_ACD58821.1 |
| 0.207346 | 0.02836  | 0.326733 | 0.18748  | gj_188520880_gb_ACD58825.1 |
| 0.196289 | 0.037148 | 0.199567 | 0.144001 | gj_188520881_gb_ACD58826.1 |
| 0.93283  | 0.97814  | 0.883088 | 0.931353 | gj_188520886_gb_ACD58831.1 |
| 0.924099 | 0.949358 | 0.883088 | 0.919118 | gj_188520887_gb_ACD58832.1 |
| 0.095609 | 0.279287 | 0.08181  | 0.152235 | gj_188520890_gb_ACD58835.1 |
| 0.178873 | 0.203429 | 0.164792 | 0.182365 | gj_188520891_gb_ACD58836.1 |
| 0.13193  | 0.23308  | 0.115986 | 0.160332 | gj_188520897_gb_ACD58842.1 |
| 0.886753 | 0.998697 | 0.738464 | 0.874638 | gj_188520900_gb_ACD58845.1 |
| 0.861192 | 0.768525 | 0.665967 | 0.665228 | gj_188520903_gb_ACD58848.1 |
| 0.177079 | 0.547853 | 0.103123 | 0.274018 | gj_188520905_gb_ACD58850.1 |
| 0.803292 | 0.855202 | 0.849923 | 0.836139 | gj_188520906_gb_ACD58851.1 |
| 0.868413 | 0.998823 | 0.727307 | 0.864848 | gj_188520907_gb_ACD58852.1 |
| 0.221491 | 0.100652 | 0.145916 | 0.15602  | gj_188520910_gb_ACD58855.1 |
| 0.197658 | 0.316263 | 0.277479 | 0.2638   | gj_188520913_gb_ACD58858.1 |
| 0.096129 | 0.04415  | 0.127194 | 0.089158 | gj_188520927_gb_ACD58872.1 |
| 0.096129 | 0.006647 | 0.115679 | 0.072818 | gj_188520928_gb_ACD58873.1 |
| 0.15046  | 0.153164 | 0.110269 | 0.137964 | gj_188520933_gb_ACD58878.1 |
| 0.175375 | 0.159896 | 0.19201  | 0.17576  | gj_188520934_gb_ACD58879.1 |
| 0.186032 | 0.053606 | 0.239577 | 0.159738 | gj_188520935_gb_ACD58880.1 |
| 0.781597 | 0.083862 | 0.699097 | 0.521519 | gj_188520936_gb_ACD58881.1 |
| 0.083402 | 0.049079 | 0.106786 | 0.079756 | gj_188520937_gb_ACD58882.1 |
| 0.079365 | 0.032609 | 0.108225 | 0.0734   | gj_188520938_gb_ACD58883.1 |
| 0.06192  | 0.031768 | 0.095349 | 0.063012 | gj_188520939_gb_ACD58884.1 |
| 0.128532 | 0.007203 | 0.155119 | 0.096951 | gj_188520941_gb_ACD58886.1 |
| 0.122282 | 0.040504 | 0.162737 | 0.108508 | gj_188520953_gb_ACD58898.1 |
| 0.096914 | 0.246197 | 0.080468 | 0.141193 | gj_188520954_gb_ACD58899.1 |
| 0.284754 | 0.724322 | 0.331369 | 0.446815 | gj_188520955_gb_ACD58900.1 |
| 0.144798 | 0.887654 | 0.330705 | 0.454386 | gj_188520961_gb_ACD58906.1 |
| 0.073645 | 0.044916 | 0.121639 | 0.080067 | gj_188520967_gb_ACD58912.1 |
| 0.196234 | 0.178433 | 0.094063 | 0.156243 | gj_18                      |

|                            |       |    |       |    |       |    |       |       |   |      |              |
|----------------------------|-------|----|-------|----|-------|----|-------|-------|---|------|--------------|
| gj_188520840_gb_ACD58785.1 | 0.142 | 42 | 0.166 | 33 | 0.343 | 24 | 0.208 | 0.182 | N | 0.51 | SignalP-TM   |
| gj_188520841_gb_ACD58786.1 | 0.125 | 40 | 0.167 | 16 | 0.432 | 6  | 0.267 | 0.214 | N | 0.57 | SignalP-noTM |
| gj_188520842_gb_ACD58787.1 | 0.148 | 39 | 0.165 | 39 | 0.258 | 30 | 0.15  | 0.159 | N | 0.51 | SignalP-TM   |
| gj_188520843_gb_ACD58788.1 | 0.217 | 21 | 0.444 | 21 | 0.961 | 10 | 0.914 | 0.665 | Y | 0.57 | SignalP-noTM |
| gj_188520845_gb_ACD58790.1 | 0.178 | 21 | 0.369 | 21 | 0.937 | 1  | 0.811 | 0.577 | Y | 0.57 | SignalP-noTM |
| gj_188520846_gb_ACD58791.1 | 0.175 | 33 | 0.147 | 33 | 0.215 | 32 | 0.11  | 0.113 | N | 0.57 | SignalP-noTM |
| gj_188520848_gb_ACD58793.1 | 0.153 | 35 | 0.113 | 37 | 0.276 | 34 | 0.095 | 0.114 | N | 0.57 | SignalP-noTM |
| gj_188520849_gb_ACD58794.1 | 0.101 | 36 | 0.102 | 62 | 0.143 | 1  | 0.096 | 0.099 | N | 0.57 | SignalP-noTM |
| gj_188520863_gb_ACD58808.1 | 0.399 | 21 | 0.358 | 21 | 0.577 | 20 | 0.37  | 0.363 | N | 0.57 | SignalP-noTM |
| gj_188520865_gb_ACD58810.1 | 0.197 | 20 | 0.163 | 20 | 0.226 | 1  | 0.147 | 0.156 | N | 0.57 | SignalP-noTM |
| gj_188520868_gb_ACD58813.1 | 0.153 | 24 | 0.131 | 24 | 0.153 | 14 | 0.117 | 0.125 | N | 0.57 | SignalP-noTM |
| gj_188520871_gb_ACD58816.1 | 0.329 | 21 | 0.53  | 21 | 0.929 | 17 | 0.838 | 0.675 | Y | 0.57 | SignalP-noTM |
| gj_188520873_gb_ACD58818.1 | 0.853 | 23 | 0.914 | 23 | 0.988 | 19 | 0.97  | 0.94  | Y | 0.57 | SignalP-noTM |
| gj_188520876_gb_ACD58821.1 | 0.107 | 36 | 0.099 | 55 | 0.107 | 43 | 0.082 | 0.091 | N | 0.57 | SignalP-noTM |
| gj_188520880_gb_ACD58825.1 | 0.154 | 31 | 0.114 | 37 | 0.146 | 36 | 0.072 | 0.094 | N | 0.57 | SignalP-noTM |
| gj_188520881_gb_ACD58826.1 | 0.192 | 30 | 0.162 | 20 | 0.277 | 1  | 0.209 | 0.184 | N | 0.57 | SignalP-noTM |
| gj_188520886_gb_ACD58831.1 | 0.119 | 46 | 0.125 | 46 | 0.154 | 34 | 0.107 | 0.117 | N | 0.57 | SignalP-noTM |
| gj_188520887_gb_ACD58832.1 | 0.168 | 15 | 0.21  | 15 | 0.382 | 13 | 0.269 | 0.238 | N | 0.57 | SignalP-noTM |
| gj_188520890_gb_ACD58835.1 | 0.121 | 7  | 0.111 | 30 | 0.132 | 10 | 0.103 | 0.107 | N | 0.57 | SignalP-noTM |
| gj_188520891_gb_ACD58836.1 | 0.106 | 22 | 0.128 | 11 | 0.217 | 1  | 0.164 | 0.141 | N | 0.51 | SignalP-TM   |
| gj_188520897_gb_ACD58842.1 | 0.273 | 41 | 0.163 | 41 | 0.165 | 5  | 0.115 | 0.145 | N | 0.51 | SignalP-TM   |
| gj_188520900_gb_ACD58845.1 | 0.233 | 22 | 0.192 | 22 | 0.2   | 3  | 0.167 | 0.18  | N | 0.57 | SignalP-noTM |
| gj_188520903_gb_ACD58848.1 | 0.189 | 26 | 0.155 | 17 | 0.258 | 13 | 0.168 | 0.161 | N | 0.57 | SignalP-noTM |
| gj_188520905_gb_ACD58850.1 | 0.113 | 42 | 0.117 | 11 | 0.181 | 5  | 0.145 | 0.127 | N | 0.51 | SignalP-TM   |
| gj_188520906_gb_ACD58851.1 | 0.115 | 22 | 0.153 | 22 | 0.298 | 11 | 0.205 | 0.177 | N | 0.57 | SignalP-noTM |
| gj_188520907_gb_ACD58852.1 | 0.212 | 20 | 0.13  | 20 | 0.105 | 30 | 0.076 | 0.105 | N | 0.57 | SignalP-noTM |
| gj_188520910_gb_ACD58855.1 | 0.143 | 51 | 0.182 | 23 | 0.283 | 20 | 0.24  | 0.209 | N | 0.57 | SignalP-noTM |
| gj_188520913_gb_ACD58858.1 | 0.109 | 30 | 0.103 | 56 | 0.12  | 52 | 0.088 | 0.096 | N | 0.57 | SignalP-noTM |
| gj_188520927_gb_ACD58872.1 | 0.549 | 29 | 0.303 | 29 | 0.436 | 28 | 0.152 | 0.232 | N | 0.57 | SignalP-noTM |
| gj_188520928_gb_ACD58873.1 | 0.135 | 24 | 0.13  | 11 | 0.281 | 10 | 0.171 | 0.149 | N | 0.57 | SignalP-noTM |
| gj_188520933_gb_ACD58878.1 | 0.112 | 27 | 0.123 | 11 | 0.201 | 5  | 0.164 | 0.138 | N | 0.51 | SignalP-TM   |
| gj_188520934_gb_ACD58879.1 | 0.121 | 32 | 0.11  | 32 | 0.164 | 4  | 0.101 | 0.106 | N | 0.57 | SignalP-noTM |
| gj_188520935_gb_ACD58880.1 | 0.106 | 55 | 0.153 | 21 | 0.278 | 15 | 0.209 | 0.18  | N | 0.57 | SignalP-noTM |
| gj_188520936_gb_ACD58881.1 | 0.113 | 26 | 0.105 | 56 | 0.11  | 29 | 0.091 | 0.098 | N | 0.57 | SignalP-noTM |
| gj_188520937_gb_ACD58882.1 | 0.221 | 17 | 0.155 | 17 | 0.175 | 13 | 0.109 | 0.133 | N | 0.57 | SignalP-noTM |
| gj_188520938_gb_ACD58883.1 | 0.122 | 16 | 0.114 | 16 | 0.16  | 26 | 0.104 | 0.11  | N | 0.57 | SignalP-noTM |
| gj_188520939_gb_ACD58884.1 | 0.116 | 30 | 0.146 | 30 | 0.314 | 7  | 0.188 | 0.166 | N | 0.57 | SignalP-noTM |
| gj_188520941_gb_ACD58886.1 | 0.161 | 23 | 0.136 | 21 | 0.321 | 45 | 0.116 | 0.127 | N | 0.57 | SignalP-noTM |
| gj_188520953_gb_ACD58898.1 | 0.114 | 18 | 0.128 | 18 | 0.215 | 15 | 0.148 | 0.137 | N | 0.57 | SignalP-noTM |
| gj_188520954_gb_ACD58899.1 | 0.259 | 21 | 0.199 | 21 | 0.207 | 2  | 0.171 | 0.188 | N | 0.51 | SignalP-TM   |
| gj_188520955_gb_ACD58900.1 | 0.155 | 42 | 0.145 | 42 | 0.224 | 19 | 0.146 | 0.146 | N | 0.57 | SignalP-noTM |
| gj_188520961_gb_ACD58906.1 | 0.101 | 39 | 0.105 | 43 | 0.125 | 1  | 0.097 | 0.101 | N | 0.57 | SignalP-noTM |
| gj_188520967_gb_ACD58912.1 | 0.112 | 35 | 0.101 | 58 | 0.125 | 4  | 0.084 | 0.093 | N | 0.57 | SignalP-noTM |
| gj_188520968_gb_ACD58913.1 | 0.11  | 30 | 0.123 | 13 | 0.181 | 6  | 0.151 | 0.136 | N | 0.57 | SignalP-noTM |
| gj_188520972_gb_ACD58917.1 | 0.277 | 33 | 0.182 | 33 | 0.179 | 29 | 0.109 | 0.148 | N | 0.57 | SignalP-noTM |
| gj_188520973_gb_ACD58918.1 | 0.284 | 32 | 0.274 | 32 | 0.572 | 13 | 0.343 | 0.306 | N | 0.57 | SignalP-noTM |
| gj_528897477_gb_ACD58920.2 | 0.116 | 66 | 0.12  | 58 | 0.201 | 1  | 0.109 | 0.115 | N | 0.57 | SignalP-noTM |
| gj_528897478_gb_ACD58925.2 | 0.107 | 66 | 0.117 | 58 | 0.201 | 1  | 0.107 | 0.112 | N | 0.57 | SignalP-noTM |
| gj_188520983_gb_ACD58928.1 | 0.119 | 34 | 0.171 | 34 | 0.311 | 32 | 0.183 | 0.177 | N | 0.57 | SignalP-noTM |
| gj_188520991_gb_ACD58936.1 | 0.113 | 33 | 0.105 | 58 | 0.115 | 45 | 0.088 | 0.097 | N | 0.57 | SignalP-noTM |
| gj_188520997_gb_ACD58942.1 | 0.109 | 27 | 0.099 | 43 | 0.106 | 38 | 0.081 | 0.091 | N | 0.57 | SignalP-noTM |
| gj_188520999_gb_ACD58944.1 | 0.131 | 22 | 0.139 | 11 | 0.242 | 2  | 0.201 | 0.168 | N | 0.57 | SignalP-noTM |
| gj_188521000_gb_ACD58945.1 | 0.155 | 42 | 0.145 | 42 | 0.21  | 19 | 0.138 | 0.141 | N | 0.57 | SignalP-noTM |
| gj_188521008_gb_ACD58953.1 | 0.449 | 24 | 0.336 | 13 | 0.632 | 6  | 0.503 | 0.415 | N | 0.57 | SignalP-noTM |
| gj_188521009_gb_ACD58954.1 | 0.259 | 49 | 0.189 | 49 | 0.193 | 44 | 0.091 | 0.143 | N | 0.57 | SignalP-noTM |
| gj_188521010_gb_ACD58955.1 | 0.118 | 33 | 0.106 | 57 | 0.122 | 49 | 0.088 | 0.098 | N | 0.57 | SignalP-noTM |
| gj_188521011_gb_ACD58956.1 | 0.111 | 43 | 0.143 | 11 | 0.34  | 2  | 0.206 | 0.173 | N | 0.57 | SignalP-noTM |
| gj_188521012_gb_ACD58957.1 | 0.139 | 21 | 0.108 | 29 | 0.12  | 31 | 0.083 | 0.096 | N | 0.57 | SignalP-noTM |
| gj_188521013_gb_ACD58958.1 | 0.113 | 21 | 0.101 | 21 | 0.117 | 19 | 0.079 | 0.091 | N | 0.57 | SignalP-noTM |
| gj_188521014_gb_ACD58959.1 | 0.124 | 34 | 0.125 | 11 | 0.201 | 3  | 0.15  | 0.137 | N | 0.57 | SignalP-noTM |
| gj_188521015_gb_ACD58960.1 | 0.142 | 27 | 0.123 | 27 | 0.123 | 14 | 0.107 | 0.115 | N | 0.57 | SignalP-noTM |
| gj_188521016_gb_ACD58961.1 | 0.11  | 33 | 0.137 | 25 | 0.263 | 21 | 0.149 | 0.143 | N | 0.57 | SignalP-noTM |
| gj_188521017_gb_ACD58962.1 | 0.255 | 36 | 0.203 | 22 | 0.46  | 16 | 0.308 | 0.253 | N | 0.57 | SignalP-noTM |
| gj_188521020_gb_ACD58965.1 | 0.103 | 49 | 0.111 | 11 | 0.167 | 1  | 0.118 | 0.114 | N | 0.57 | SignalP-noTM |
| gj_188521021_gb_ACD58966.1 | 0.768 | 20 | 0.823 | 20 | 0.916 | 14 | 0.883 | 0.851 | Y | 0.57 | SignalP-noTM |
| gj_188521022_gb_ACD58967.1 | 0.246 | 65 | 0.299 | 20 | 0.662 | 4  | 0.503 | 0.395 | N | 0.57 | SignalP-noTM |
| gj_188521024_gb_ACD58969.1 | 0.14  | 19 | 0.125 | 19 | 0.133 | 10 | 0.104 | 0.115 | N | 0.57 | SignalP-noTM |
| gj_188521025_gb_ACD58970.1 | 0.102 | 37 | 0.116 | 16 | 0.163 | 10 | 0.131 | 0.123 | N | 0.57 | SignalP-noTM |
| gj_188521027_gb_ACD58972.1 | 0.139 | 56 | 0.133 | 20 | 0.283 | 14 | 0.137 | 0.135 | N | 0.57 | SignalP-noTM |
| gj_188521028_gb_ACD58973.1 | 0.185 | 34 | 0.164 | 11 | 0.382 | 2  | 0.264 | 0.211 | N | 0.57 | SignalP-noTM |
| gj_188521029_gb_ACD58974.1 | 0.147 | 19 | 0.239 | 19 | 0.495 | 17 | 0.385 | 0.293 | N | 0.51 | SignalP-TM   |
| gj_188521030_gb_ACD58975.1 | 0.135 | 38 | 0.161 | 20 | 0.307 | 11 | 0.229 | 0.193 | N | 0.57 | SignalP-noTM |
| gj_188521031_gb_ACD58976.1 | 0.13  | 22 | 0.113 | 22 | 0.133 | 20 | 0.096 | 0.107 | N | 0.51 | SignalP-TM   |
| gj_188521041_gb_ACD58986.1 | 0.218 | 19 | 0.305 | 19 | 0.555 | 23 | 0.419 | 0.358 | N | 0.57 | SignalP-noTM |
| gj_188521042_gb_ACD58987.1 | 0.102 | 11 | 0.128 | 11 | 0.195 | 3  | 0.161 | 0.144 | N | 0.57 | SignalP-noTM |
| gj_188521043_gb_ACD58988.1 | 0.277 | 33 | 0.176 | 33 | 0.164 | 32 | 0.106 | 0.143 | N | 0.57 | SignalP-noTM |
| gj_188521045_gb_ACD58990.1 | 0.152 | 47 | 0.193 | 42 | 0.363 | 37 | 0.152 | 0.178 | N | 0.51 | SignalP-TM   |
| gj_188521046_gb_ACD58991.1 | 0.114 | 34 | 0.117 | 37 | 0.164 | 36 | 0.094 | 0.107 | N | 0.57 | SignalP-noTM |

|          |          |          |          |                            |
|----------|----------|----------|----------|----------------------------|
| 0.093553 | 0.074055 | 0.095868 | 0.087825 | gj_188521066_gb_ACD59011.1 |
| 0.168666 | 0.092541 | 0.1603   | 0.139902 | gj_188521067_gb_ACD59012.1 |
| 0.936136 | 0.991934 | 0.904909 | 0.944326 | gj_188521069_gb_ACD59014.1 |
| 0.16645  | 0.059023 | 0.112047 | 0.112507 | gj_188521072_gb_ACD59017.1 |
| 0.135053 | 0.018487 | 0.154277 | 0.102756 | gj_188521074_gb_ACD59019.1 |
| 0.157493 | 0.224088 | 0.127194 | 0.169592 | gj_188521075_gb_ACD59020.1 |
| 0.057378 | 0.086195 | 0.090792 | 0.078122 | gj_188521078_gb_ACD59023.1 |
| 0.083173 | 0.001911 | 0.114153 | 0.066412 | gj_188521079_gb_ACD59024.1 |
| 0.090298 | 0.106215 | 0.091289 | 0.095934 | gj_188521080_gb_ACD59025.1 |
| 0.110269 | 0.144798 | 0.091538 | 0.115535 | gj_188521083_gb_ACD59028.1 |
| 0.085021 | 0.032227 | 0.114762 | 0.07737  | gj_188521084_gb_ACD59029.1 |
| 0.185126 | 0.086669 | 0.251807 | 0.174534 | gj_188521085_gb_ACD59030.1 |
| 0.059189 | 0.004026 | 0.097969 | 0.053728 | gj_188521086_gb_ACD59031.1 |
| 0.128532 | 0.163147 | 0.115373 | 0.135684 | gj_188521087_gb_ACD59032.1 |
| 0.150077 | 0.209822 | 0.228289 | 0.196063 | gj_188521088_gb_ACD59033.1 |
| 0.120999 | 0.16645  | 0.1034   | 0.130283 | gj_188521089_gb_ACD59034.1 |
| 0.097704 | 0.006686 | 0.127527 | 0.077306 | gj_188521090_gb_ACD59035.1 |
| 0.240672 | 0.102845 | 0.405163 | 0.24956  | gj_188521091_gb_ACD59036.1 |
| 0.138596 | 0.171505 | 0.187399 | 0.165833 | gj_188521092_gb_ACD59037.1 |
| 0.148552 | 0.353658 | 0.114153 | 0.205454 | gj_188521093_gb_ACD59038.1 |
| 0.813513 | 0.938601 | 0.802342 | 0.851485 | gj_188521102_gb_ACD59047.1 |
| 0.091289 | 0.292143 | 0.205925 | 0.197586 | gj_188521103_gb_ACD59048.1 |
| 0.091538 | 0.730271 | 0.186943 | 0.336251 | gj_188521104_gb_ACD59049.1 |
| 0.322785 | 0.250115 | 0.378011 | 0.31697  | gj_188521105_gb_ACD59050.1 |
| 0.825058 | 0.890903 | 0.776953 | 0.830971 | gj_188521106_gb_ACD59051.1 |
| 0.954436 | 0.99975  | 0.89264  | 0.948942 | gj_188521107_gb_ACD59052.1 |
| 0.096129 | 0.04415  | 0.12196  | 0.087413 | gj_188521108_gb_ACD59053.1 |
| 0.162737 | 0.479012 | 0.097176 | 0.246308 | gj_188521109_gb_ACD59054.1 |
| 0.156303 | 0.002233 | 0.246754 | 0.135907 | gj_188521110_gb_ACD59055.1 |
| 0.223567 | 0.218403 | 0.345473 | 0.262481 | gj_188521111_gb_ACD59056.1 |
| 0.89264  | 0.996069 | 0.810767 | 0.899825 | gj_188521115_gb_ACD59060.1 |
| 0.125209 | 0.620578 | 0.082262 | 0.276016 |                            |

|                            |       |    |       |    |       |    |       |       |   |      |              |
|----------------------------|-------|----|-------|----|-------|----|-------|-------|---|------|--------------|
| gj_188521050_gb_ACD58995_1 | 0.11  | 36 | 0.144 | 11 | 0.292 | 3  | 0.21  | 0.175 | N | 0.57 | SignalP-noTM |
| gj_188521051_gb_ACD58996_1 | 0.18  | 28 | 0.115 | 43 | 0.148 | 41 | 0.078 | 0.098 | N | 0.57 | SignalP-noTM |
| gj_188521052_gb_ACD58997_1 | 0.102 | 15 | 0.104 | 50 | 0.131 | 29 | 0.096 | 0.1   | N | 0.57 | SignalP-noTM |
| gj_188521054_gb_ACD58999_1 | 0.595 | 38 | 0.331 | 38 | 0.359 | 23 | 0.186 | 0.277 | N | 0.51 | SignalP-TM   |
| gj_188521055_gb_ACD59000_1 | 0.251 | 33 | 0.118 | 33 | 0.143 | 49 | 0.085 | 0.106 | N | 0.51 | SignalP-TM   |
| gj_188521056_gb_ACD59001_1 | 0.101 | 20 | 0.107 | 14 | 0.165 | 10 | 0.114 | 0.111 | N | 0.57 | SignalP-noTM |
| gj_188521057_gb_ACD59002_1 | 0.221 | 45 | 0.14  | 35 | 0.251 | 34 | 0.091 | 0.117 | N | 0.57 | SignalP-noTM |
| gj_188521058_gb_ACD59003_1 | 0.263 | 32 | 0.216 | 32 | 0.295 | 13 | 0.202 | 0.211 | N | 0.51 | SignalP-TM   |
| gj_188521060_gb_ACD59005_1 | 0.119 | 29 | 0.153 | 20 | 0.28  | 12 | 0.198 | 0.174 | N | 0.57 | SignalP-noTM |
| gj_188521061_gb_ACD59006_1 | 0.119 | 39 | 0.143 | 13 | 0.281 | 4  | 0.208 | 0.174 | N | 0.57 | SignalP-noTM |
| gj_188521062_gb_ACD59007_1 | 0.119 | 30 | 0.124 | 11 | 0.195 | 4  | 0.158 | 0.14  | N | 0.57 | SignalP-noTM |
| gj_188521065_gb_ACD59010_1 | 0.122 | 45 | 0.103 | 68 | 0.115 | 59 | 0.087 | 0.096 | N | 0.57 | SignalP-noTM |
| gj_188521066_gb_ACD59011_1 | 0.171 | 69 | 0.127 | 69 | 0.103 | 69 | 0.074 | 0.102 | N | 0.57 | SignalP-noTM |
| gj_188521067_gb_ACD59012_1 | 0.114 | 33 | 0.114 | 33 | 0.14  | 29 | 0.088 | 0.102 | N | 0.57 | SignalP-noTM |
| gj_188521069_gb_ACD59014_1 | 0.391 | 22 | 0.311 | 22 | 0.713 | 1  | 0.33  | 0.32  | N | 0.57 | SignalP-noTM |
| gj_188521072_gb_ACD59017_1 | 0.318 | 23 | 0.24  | 23 | 0.294 | 14 | 0.203 | 0.223 | N | 0.57 | SignalP-noTM |
| gj_188521074_gb_ACD59019_1 | 0.115 | 59 | 0.12  | 51 | 0.197 | 43 | 0.111 | 0.116 | N | 0.57 | SignalP-noTM |
| gj_188521075_gb_ACD59020_1 | 0.126 | 17 | 0.128 | 17 | 0.192 | 1  | 0.14  | 0.134 | N | 0.57 | SignalP-noTM |
| gj_188521078_gb_ACD59023_1 | 0.118 | 24 | 0.107 | 24 | 0.134 | 37 | 0.093 | 0.101 | N | 0.57 | SignalP-noTM |
| gj_188521079_gb_ACD59024_1 | 0.109 | 31 | 0.113 | 31 | 0.177 | 46 | 0.098 | 0.106 | N | 0.57 | SignalP-noTM |
| gj_188521080_gb_ACD59025_1 | 0.133 | 22 | 0.121 | 11 | 0.256 | 1  | 0.132 | 0.126 | N | 0.57 | SignalP-noTM |
| gj_188521083_gb_ACD59028_1 | 0.205 | 42 | 0.132 | 42 | 0.137 | 1  | 0.094 | 0.115 | N | 0.57 | SignalP-noTM |
| gj_188521084_gb_ACD59029_1 | 0.13  | 41 | 0.119 | 41 | 0.147 | 2  | 0.082 | 0.105 | N | 0.51 | SignalP-TM   |
| gj_188521085_gb_ACD59030_1 | 0.155 | 39 | 0.104 | 39 | 0.124 | 14 | 0.087 | 0.096 | N | 0.57 | SignalP-noTM |
| gj_188521086_gb_ACD59031_1 | 0.124 | 18 | 0.102 | 59 | 0.111 | 41 | 0.086 | 0.095 | N | 0.57 | SignalP-noTM |
| gj_188521087_gb_ACD59032_1 | 0.15  | 44 | 0.127 | 44 | 0.144 | 5  | 0.092 | 0.114 | N | 0.51 | SignalP-TM   |
| gj_188521088_gb_ACD59033_1 | 0.115 | 25 | 0.109 | 11 | 0.201 | 1  | 0.111 | 0.109 | N | 0.51 | SignalP-TM   |
| gj_188521089_gb_ACD59034_1 | 0.119 | 21 | 0.112 | 39 | 0.145 | 33 | 0.091 | 0.105 | N | 0.51 | SignalP-TM   |
| gj_188521090_gb_ACD59035_1 | 0.267 | 25 | 0.221 | 25 | 0.286 | 5  | 0.211 | 0.217 | N | 0.51 | SignalP-TM   |
| gj_188521091_gb_ACD59036_1 | 0.154 | 39 | 0.117 | 39 | 0.112 | 58 | 0.078 | 0.099 | N | 0.57 | SignalP-noTM |
| gj_188521092_gb_ACD59037_1 | 0.113 | 17 | 0.107 | 69 | 0.12  | 59 | 0.096 | 0.102 | N | 0.57 | SignalP-noTM |
| gj_188521093_gb_ACD59038_1 | 0.123 | 17 | 0.141 | 42 | 0.223 | 40 | 0.114 | 0.128 | N | 0.57 | SignalP-noTM |
| gj_188521102_gb_ACD59047_1 | 0.183 | 13 | 0.155 | 13 | 0.23  | 5  | 0.131 | 0.144 | N | 0.57 | SignalP-noTM |
| gj_188521103_gb_ACD59048_1 | 0.125 | 45 | 0.137 | 45 | 0.189 | 5  | 0.119 | 0.13  | N | 0.51 | SignalP-TM   |
| gj_188521104_gb_ACD59049_1 | 0.58  | 31 | 0.277 | 31 | 0.316 | 3  | 0.195 | 0.247 | N | 0.51 | SignalP-TM   |
| gj_188521105_gb_ACD59050_1 | 0.137 | 62 | 0.111 | 28 | 0.158 | 2  | 0.111 | 0.111 | N | 0.57 | SignalP-noTM |
| gj_188521106_gb_ACD59051_1 | 0.131 | 64 | 0.134 | 14 | 0.209 | 10 | 0.132 | 0.133 | N | 0.57 | SignalP-noTM |
| gj_188521107_gb_ACD59052_1 | 0.88  | 34 | 0.917 | 34 | 0.979 | 28 | 0.84  | 0.881 | Y | 0.57 | SignalP-noTM |
| gj_188521108_gb_ACD59053_1 | 0.184 | 48 | 0.127 | 48 | 0.154 | 9  | 0.098 | 0.113 | N | 0.57 | SignalP-noTM |
| gj_188521109_gb_ACD59054_1 | 0.129 | 26 | 0.123 | 26 | 0.166 | 53 | 0.116 | 0.12  | N | 0.57 | SignalP-noTM |
| gj_188521110_gb_ACD59055_1 | 0.188 | 66 | 0.135 | 66 | 0.286 | 1  | 0.103 | 0.12  | N | 0.57 | SignalP-noTM |
| gj_188521111_gb_ACD59056_1 | 0.372 | 33 | 0.437 | 33 | 0.789 | 18 | 0.633 | 0.53  | N | 0.57 | SignalP-noTM |
| gj_188521115_gb_ACD59060_1 | 0.843 | 23 | 0.816 | 23 | 0.946 | 7  | 0.848 | 0.831 | Y | 0.57 | SignalP-noTM |
| gj_188521118_gb_ACD59063_1 | 0.114 | 53 | 0.106 | 53 | 0.113 | 53 | 0.089 | 0.098 | N | 0.57 | SignalP-noTM |
| gj_188521119_gb_ACD59064_1 | 0.154 | 30 | 0.179 | 14 | 0.46  | 13 | 0.276 | 0.225 | N | 0.57 | SignalP-noTM |
| gj_188521129_gb_ACD59074_1 | 0.124 | 38 | 0.111 | 38 | 0.133 | 25 | 0.103 | 0.107 | N | 0.57 | SignalP-noTM |
| gj_188521130_gb_ACD59075_1 | 0.835 | 23 | 0.871 | 23 | 0.937 | 17 | 0.895 | 0.882 | Y | 0.57 | SignalP-noTM |
| gj_188521131_gb_ACD59076_1 | 0.223 | 19 | 0.452 | 19 | 0.978 | 9  | 0.923 | 0.673 | Y | 0.57 | SignalP-noTM |
| gj_188521132_gb_ACD59077_1 | 0.111 | 55 | 0.121 | 11 | 0.235 | 3  | 0.135 | 0.128 | N | 0.57 | SignalP-noTM |
| gj_188521134_gb_ACD59079_1 | 0.128 | 25 | 0.126 | 25 | 0.175 | 27 | 0.133 | 0.13  | N | 0.57 | SignalP-noTM |
| gj_188521141_gb_ACD59086_1 | 0.153 | 31 | 0.16  | 15 | 0.334 | 6  | 0.254 | 0.194 | N | 0.51 | SignalP-TM   |
| gj_188521142_gb_ACD59087_1 | 0.212 | 35 | 0.148 | 35 | 0.175 | 31 | 0.081 | 0.116 | N | 0.57 | SignalP-noTM |
| gj_188521143_gb_ACD59088_1 | 0.121 | 13 | 0.112 | 13 | 0.166 | 9  | 0.103 | 0.108 | N | 0.57 | SignalP-noTM |
| gj_188521148_gb_ACD59093_1 | 0.098 | 43 | 0.117 | 13 | 0.162 | 5  | 0.143 | 0.127 | N | 0.51 | SignalP-TM   |
| gj_188521150_gb_ACD59095_1 | 0.105 | 36 | 0.129 | 11 | 0.219 | 5  | 0.18  | 0.148 | N | 0.51 | SignalP-TM   |
| gj_188521151_gb_ACD59096_1 | 0.114 | 22 | 0.144 | 13 | 0.262 | 9  | 0.209 | 0.175 | N | 0.57 | SignalP-noTM |
| gj_188521152_gb_ACD59097_1 | 0.11  | 9  | 0.104 | 39 | 0.122 | 28 | 0.081 | 0.094 | N | 0.57 | SignalP-noTM |
| gj_188521153_gb_ACD59098_1 | 0.108 | 22 | 0.1   | 22 | 0.106 | 16 | 0.088 | 0.094 | N | 0.57 | SignalP-noTM |
| gj_188521155_gb_ACD59100_1 | 0.105 | 29 | 0.099 | 36 | 0.109 | 1  | 0.09  | 0.094 | N | 0.57 | SignalP-noTM |
| gj_188521156_gb_ACD59101_1 | 0.113 | 24 | 0.105 | 11 | 0.139 | 2  | 0.112 | 0.108 | N | 0.51 | SignalP-TM   |
| gj_188521160_gb_ACD59105_1 | 0.12  | 20 | 0.127 | 25 | 0.163 | 34 | 0.12  | 0.124 | N | 0.57 | SignalP-noTM |
| gj_188521162_gb_ACD59107_1 | 0.161 | 58 | 0.16  | 11 | 0.351 | 2  | 0.263 | 0.208 | N | 0.57 | SignalP-noTM |
| gj_188521163_gb_ACD59108_1 | 0.156 | 22 | 0.16  | 22 | 0.266 | 5  | 0.191 | 0.175 | N | 0.57 | SignalP-noTM |
| gj_188521164_gb_ACD59109_1 | 0.155 | 17 | 0.362 | 17 | 0.929 | 15 | 0.852 | 0.592 | Y | 0.57 | SignalP-noTM |
| gj_188521165_gb_ACD59110_1 | 0.105 | 47 | 0.101 | 22 | 0.125 | 18 | 0.085 | 0.095 | N | 0.51 | SignalP-TM   |
| gj_188521166_gb_ACD59111_1 | 0.106 | 45 | 0.098 | 60 | 0.106 | 44 | 0.089 | 0.093 | N | 0.57 | SignalP-noTM |
| gj_188521167_gb_ACD59112_1 | 0.343 | 21 | 0.323 | 21 | 0.547 | 1  | 0.317 | 0.32  | N | 0.57 | SignalP-noTM |
| gj_188521168_gb_ACD59113_1 | 0.1   | 69 | 0.108 | 11 | 0.133 | 1  | 0.114 | 0.111 | N | 0.57 | SignalP-noTM |
| gj_188521169_gb_ACD59114_1 | 0.135 | 17 | 0.106 | 17 | 0.129 | 46 | 0.084 | 0.096 | N | 0.57 | SignalP-noTM |
| gj_188521177_gb_ACD59122_1 | 0.107 | 27 | 0.129 | 11 | 0.21  | 2  | 0.165 | 0.146 | N | 0.57 | SignalP-noTM |
| gj_188521178_gb_ACD59123_1 | 0.272 | 21 | 0.293 | 21 | 0.517 | 9  | 0.35  | 0.32  | N | 0.57 | SignalP-noTM |
| gj_188521180_gb_ACD59125_1 | 0.613 | 29 | 0.748 | 29 | 0.972 | 14 | 0.886 | 0.813 | Y | 0.57 | SignalP-noTM |
| gj_188521181_gb_ACD59126_1 | 0.488 | 19 | 0.64  | 19 | 0.925 | 13 | 0.817 | 0.723 | Y | 0.57 | SignalP-noTM |
| gj_188521182_gb_ACD59127_1 | 0.131 | 58 | 0.129 | 58 | 0.169 | 56 | 0.105 | 0.12  | N | 0.51 | SignalP-TM   |
| gj_188521189_gb_ACD59134_1 | 0.376 | 19 | 0.238 | 19 | 0.183 | 17 | 0.147 | 0.196 | N | 0.57 | SignalP-noTM |
| gj_188521190_gb_ACD59135_1 | 0.104 | 46 | 0.112 | 46 | 0.195 | 4  | 0.112 | 0.112 | N | 0.57 | SignalP-noTM |
| gj_188521197_gb_ACD59142_1 | 0.294 | 22 | 0.254 | 22 | 0.427 | 21 | 0.217 | 0.237 | N | 0.57 | SignalP-noTM |
| gj_188521200_gb_ACD59145_1 | 0.138 | 23 | 0.161 | 11 | 0.368 | 1  | 0.256 | 0.205 | N | 0.57 | SignalP-noTM |

|          |          |          |          |                            |
|----------|----------|----------|----------|----------------------------|
| 0.066051 | 0.007246 | 0.091788 | 0.055028 | gj_188521189_gb_ACD59134_1 |
| 0.23041  | 0.19201  | 0.318212 | 0.246877 | gj_188521190_gb_ACD59135_1 |
| 0.115679 | 0.045564 | 0.127527 | 0.096257 | gj_188521197_gb_ACD59142_1 |
| 0.077201 | 0.043149 | 0.112946 | 0.077765 | gj_188521200_gb_ACD59145_1 |
| 0.207346 | 0.039128 | 0.210818 | 0.152431 | gj_188521201_gb_ACD59146_1 |
| 0.950358 | 0.995623 | 0.936849 | 0.960943 | gj_188521202_gb_ACD59147_1 |
| 0.130222 | 0.533699 | 0.157892 | 0.273938 | gj_188521203_gb_ACD59148_1 |
| 0.080025 | 0.000776 | 0.092793 | 0.057865 | gj_188521247_gb_ACD59192_1 |
| 0.148173 | 0.968046 | 0.147418 | 0.421212 | gj_188521251_gb_ACD59196_1 |
| 0.198134 | 0.073645 | 0.145542 | 0.139107 | gj_188521264_gb_ACD59209_1 |
| 0.951616 | 0.896321 | 0.899619 | 0.915852 | gj_188521268_gb_ACD59213_1 |
| 0.295879 | 0.773293 | 0.35503  | 0.474734 | gj_188521269_gb_ACD59214_1 |
| 0.236313 | 0.386511 | 0.188773 | 0.270532 | gj_188521270_gb_ACD59215_1 |
| 0.954566 | 0.902824 | 0.895201 | 0.91753  | gj_188521271_gb_ACD59216_1 |
| 0.936672 | 0.999926 | 0.895762 | 0.94412  | gj_188521272_gb_ACD59217_1 |
| 0.431435 | 0.267959 | 0.531458 | 0.410284 | gj_188521274_gb_ACD59219_1 |
| 0.333366 | 0.125868 | 0.265612 | 0.241615 | gj_188521275_gb_ACD59220_1 |
| 0.310454 | 0.424824 | 0.220458 | 0.318579 | gj_188521276_gb_ACD59221_1 |
| 0.262697 | 0.558974 | 0.038362 | 0.301844 | gj_188521283_gb_ACD59228_1 |
| 0.109097 | 0.039015 | 0.103123 | 0.083745 | gj_188521284_gb_ACD59229_1 |
| 0.346473 | 0.508249 | 0.49325  | 0.448991 | gj_188519018_gb_ACD59663_1 |
| 0.301535 | 0.745357 | 0.360545 | 0.469146 | gj_188519019_gb_ACD59664_1 |
| 0.835208 | 0.995865 | 0.842507 | 0.891193 | gj_188519020_gb_ACD59665_1 |
| 0.870794 | 0.998408 | 0.887355 | 0.918852 | gj_188519021_gb_ACD59666_1 |
| 0.893214 | 0.996439 | 0.870456 | 0.920036 | gj_188519022_gb_ACD59667_1 |
| 0.08883  | 0.005346 | 0.117222 | 0.070466 | gj_188519025_gb_ACD59670_1 |
| 0.368188 | 0.990097 | 0.087864 | 0.48205  | gj_188519026_gb_ACD59671_1 |
| 0.934134 | 0.995675 | 0.906447 | 0.945419 | gj_188519034_gb_ACD59679_1 |
| 0.136815 | 0.043898 | 0.111155 | 0.097289 | gj_188519038_gb_ACD59683_1 |
| 0.129544 | 0.02401  | 0.163967 | 0.10584  | gj_188519039_gb_ACD59684_1 |
| 0.272099 | 0.036299 | 0.204891 | 0.171096 | gj_188519041_gb_ACD59686_1 |
| 0.786675 | 0.992966 | 0.715856 | 0.831832 | gj_188519043_gb_ACD59688_1 |
| 0.153164 | 0.073237 | 0.197182 | 0.141194 | gj_188519044_gb_ACD59689_1 |
| 0.193879 | 0.204891 |          |          |                            |

|                            |       |    |       |    |       |    |       |       |   |      |              |
|----------------------------|-------|----|-------|----|-------|----|-------|-------|---|------|--------------|
| gj_188521201.gb_ACD59146.1 | 0.108 | 50 | 0.102 | 64 | 0.115 | 57 | 0.076 | 0.09  | N | 0.57 | SignalP-noTM |
| gj_188521202.gb_ACD59147.1 | 0.29  | 28 | 0.237 | 28 | 0.332 | 8  | 0.23  | 0.234 | N | 0.57 | SignalP-noTM |
| gj_188521203.gb_ACD59148.1 | 0.791 | 18 | 0.862 | 18 | 0.972 | 11 | 0.927 | 0.892 | Y | 0.57 | SignalP-noTM |
| gj_188521247.gb_ACD59192.1 | 0.473 | 37 | 0.292 | 37 | 0.328 | 34 | 0.09  | 0.217 | N | 0.51 | SignalIP-TM  |
| gj_188521251.gb_ACD59196.1 | 0.207 | 38 | 0.213 | 11 | 0.531 | 5  | 0.46  | 0.329 | N | 0.57 | SignalP-noTM |
| gj_188521264.gb_ACD59209.1 | 0.112 | 29 | 0.144 | 11 | 0.317 | 1  | 0.199 | 0.17  | N | 0.57 | SignalP-noTM |
| gj_188521268.gb_ACD59213.1 | 0.155 | 33 | 0.153 | 11 | 0.327 | 1  | 0.226 | 0.187 | N | 0.57 | SignalP-noTM |
| gj_188521269.gb_ACD59214.1 | 0.156 | 42 | 0.146 | 42 | 0.219 | 19 | 0.143 | 0.145 | N | 0.57 | SignalP-noTM |
| gj_188521270.gb_ACD59215.1 | 0.112 | 14 | 0.122 | 11 | 0.237 | 1  | 0.142 | 0.13  | N | 0.51 | SignalIP-TM  |
| gj_188521271.gb_ACD59216.1 | 0.189 | 22 | 0.183 | 22 | 0.319 | 20 | 0.195 | 0.189 | N | 0.57 | SignalP-noTM |
| gj_188521272.gb_ACD59217.1 | 0.164 | 50 | 0.224 | 12 | 0.476 | 9  | 0.378 | 0.297 | N | 0.57 | SignalP-noTM |
| gj_188521274.gb_ACD59219.1 | 0.107 | 38 | 0.108 | 12 | 0.159 | 1  | 0.115 | 0.111 | N | 0.57 | SignalP-noTM |
| gj_188521275.gb_ACD59220.1 | 0.283 | 32 | 0.272 | 32 | 0.565 | 13 | 0.338 | 0.303 | N | 0.57 | SignalP-noTM |
| gj_188521276.gb_ACD59221.1 | 0.1   | 43 | 0.116 | 37 | 0.146 | 33 | 0.107 | 0.111 | N | 0.57 | SignalP-noTM |
| gj_188521283.gb_ACD59228.1 | 0.357 | 10 | 0.099 | 28 | 0.114 | 9  | 0.094 | 0.097 | N | 0.57 | SignalP-noTM |
| gj_188521284.gb_ACD59229.1 | 0.132 | 28 | 0.119 | 28 | 0.18  | 25 | 0.091 | 0.106 | N | 0.57 | SignalP-noTM |
| gj_188518964.gb_ACD59609.1 | 0.14  | 27 | 0.127 | 40 | 0.207 | 39 | 0.102 | 0.115 | N | 0.57 | SignalP-noTM |
| gj_188518967.gb_ACD59612.1 | 0.19  | 27 | 0.248 | 27 | 0.512 | 21 | 0.266 | 0.255 | N | 0.51 | SignalIP-TM  |
| gj_188518968.gb_ACD59613.1 | 0.806 | 33 | 0.849 | 33 | 0.984 | 21 | 0.902 | 0.874 | Y | 0.57 | SignalP-noTM |
| gj_188518969.gb_ACD59614.1 | 0.854 | 33 | 0.891 | 33 | 0.995 | 19 | 0.949 | 0.918 | Y | 0.57 | SignalP-noTM |
| gj_188518970.gb_ACD59615.1 | 0.139 | 60 | 0.117 | 38 | 0.149 | 9  | 0.114 | 0.115 | N | 0.57 | SignalP-noTM |
| gj_188518975.gb_ACD59620.1 | 0.105 | 22 | 0.107 | 35 | 0.125 | 34 | 0.089 | 0.098 | N | 0.57 | SignalP-noTM |
| gj_188518981.gb_ACD59626.1 | 0.156 | 42 | 0.146 | 42 | 0.219 | 19 | 0.143 | 0.145 | N | 0.57 | SignalP-noTM |
| gj_188518982.gb_ACD59627.1 | 0.23  | 24 | 0.459 | 24 | 0.965 | 20 | 0.918 | 0.675 | Y | 0.57 | SignalP-noTM |
| gj_188518983.gb_ACD59628.1 | 0.154 | 28 | 0.111 | 28 | 0.155 | 1  | 0.081 | 0.097 | N | 0.57 | SignalP-noTM |
| gj_188518984.gb_ACD59629.1 | 0.135 | 18 | 0.149 | 18 | 0.253 | 1  | 0.17  | 0.159 | N | 0.57 | SignalP-noTM |
| gj_188518989.gb_ACD59634.1 | 0.163 | 25 | 0.149 | 25 | 0.258 | 7  | 0.171 | 0.159 | N | 0.57 | SignalP-noTM |
| gj_188518992.gb_ACD59637.1 | 0.142 | 29 | 0.117 | 29 | 0.129 | 27 | 0.091 | 0.105 | N | 0.57 | SignalP-noTM |
| gj_188518993.gb_ACD59638.1 | 0.117 | 63 | 0.131 | 11 | 0.229 | 4  | 0.181 | 0.155 | N | 0.57 | SignalP-noTM |
| gj_188518994.gb_ACD59639.1 | 0.105 | 60 | 0.111 | 46 | 0.155 | 52 | 0.096 | 0.104 | N | 0.57 | SignalP-noTM |
| gj_188519008.gb_ACD59653.1 | 0.22  | 20 | 0.357 | 20 | 0.863 | 1  | 0.654 | 0.497 | N | 0.57 | SignalP-noTM |
| gj_188519010.gb_ACD59655.1 | 0.111 | 31 | 0.1   | 70 | 0.128 | 1  | 0.072 | 0.09  | N | 0.51 | SignalIP-TM  |
| gj_188519018.gb_ACD59663.1 | 0.136 | 60 | 0.115 | 15 | 0.194 | 5  | 0.125 | 0.12  | N | 0.57 | SignalP-noTM |
| gj_188519019.gb_ACD59664.1 | 0.151 | 45 | 0.141 | 45 | 0.194 | 44 | 0.133 | 0.138 | N | 0.57 | SignalP-noTM |
| gj_188519020.gb_ACD59665.1 | 0.167 | 23 | 0.153 | 23 | 0.327 | 44 | 0.12  | 0.137 | N | 0.57 | SignalP-noTM |
| gj_188519021.gb_ACD59666.1 | 0.216 | 24 | 0.151 | 55 | 0.156 | 46 | 0.11  | 0.131 | N | 0.57 | SignalP-noTM |
| gj_188519022.gb_ACD59667.1 | 0.315 | 23 | 0.302 | 23 | 0.356 | 15 | 0.273 | 0.288 | N | 0.57 | SignalP-noTM |
| gj_188519025.gb_ACD59670.1 | 0.119 | 29 | 0.148 | 11 | 0.329 | 2  | 0.211 | 0.178 | N | 0.57 | SignalP-noTM |
| gj_188519026.gb_ACD59671.1 | 0.11  | 20 | 0.241 | 20 | 0.635 | 14 | 0.507 | 0.366 | N | 0.57 | SignalP-noTM |
| gj_188519034.gb_ACD59679.1 | 0.205 | 18 | 0.286 | 18 | 0.545 | 1  | 0.407 | 0.343 | N | 0.57 | SignalP-noTM |
| gj_188519038.gb_ACD59683.1 | 0.161 | 24 | 0.119 | 11 | 0.247 | 1  | 0.123 | 0.121 | N | 0.57 | SignalP-noTM |
| gj_188519039.gb_ACD59684.1 | 0.13  | 26 | 0.124 | 26 | 0.152 | 7  | 0.12  | 0.122 | N | 0.57 | SignalP-noTM |
| gj_188519041.gb_ACD59686.1 | 0.119 | 19 | 0.109 | 35 | 0.158 | 29 | 0.095 | 0.102 | N | 0.57 | SignalP-noTM |
| gj_188519043.gb_ACD59688.1 | 0.128 | 56 | 0.116 | 11 | 0.17  | 1  | 0.133 | 0.124 | N | 0.57 | SignalP-noTM |
| gj_188519044.gb_ACD59689.1 | 0.143 | 42 | 0.15  | 42 | 0.226 | 49 | 0.106 | 0.129 | N | 0.57 | SignalP-noTM |
| gj_188519048.gb_ACD59693.1 | 0.175 | 33 | 0.146 | 33 | 0.213 | 32 | 0.109 | 0.129 | N | 0.57 | SignalP-noTM |
| gj_188519049.gb_ACD59694.1 | 0.133 | 22 | 0.158 | 22 | 0.292 | 11 | 0.194 | 0.175 | N | 0.57 | SignalP-noTM |
| gj_188519051.gb_ACD59696.1 | 0.115 | 40 | 0.112 | 40 | 0.154 | 35 | 0.094 | 0.103 | N | 0.57 | SignalP-noTM |
| gj_188519054.gb_ACD59699.1 | 0.189 | 43 | 0.136 | 43 | 0.157 | 1  | 0.096 | 0.117 | N | 0.57 | SignalP-noTM |
| gj_188519057.gb_ACD57002.1 | 0.2   | 36 | 0.204 | 11 | 0.551 | 3  | 0.426 | 0.286 | N | 0.51 | SignalIP-TM  |
| gj_188519060.gb_ACD57005.1 | 0.105 | 45 | 0.105 | 51 | 0.184 | 42 | 0.087 | 0.096 | N | 0.57 | SignalP-noTM |
| gj_188519061.gb_ACD57006.1 | 0.173 | 36 | 0.185 | 36 | 0.344 | 24 | 0.184 | 0.184 | N | 0.57 | SignalP-noTM |
| gj_188519062.gb_ACD57007.1 | 0.143 | 42 | 0.16  | 11 | 0.327 | 2  | 0.257 | 0.196 | N | 0.51 | SignalIP-TM  |
| gj_188519063.gb_ACD57008.1 | 0.777 | 29 | 0.86  | 29 | 0.986 | 21 | 0.95  | 0.902 | Y | 0.57 | SignalP-noTM |
| gj_188519072.gb_ACD57017.1 | 0.136 | 29 | 0.097 | 29 | 0.098 | 40 | 0.057 | 0.078 | N | 0.57 | SignalP-noTM |
| gj_188519073.gb_ACD57018.1 | 0.729 | 32 | 0.806 | 32 | 0.979 | 28 | 0.789 | 0.798 | Y | 0.57 | SignalP-noTM |
| gj_188519074.gb_ACD57019.1 | 0.211 | 18 | 0.328 | 18 | 0.742 | 1  | 0.558 | 0.436 | N | 0.57 | SignalP-noTM |
| gj_188519075.gb_ACD57020.1 | 0.106 | 62 | 0.114 | 42 | 0.147 | 34 | 0.107 | 0.111 | N | 0.57 | SignalP-noTM |
| gj_188519076.gb_ACD57021.1 | 0.328 | 17 | 0.48  | 17 | 0.843 | 13 | 0.707 | 0.587 | Y | 0.57 | SignalP-noTM |
| gj_188519077.gb_ACD57022.1 | 0.702 | 35 | 0.488 | 35 | 0.517 | 27 | 0.233 | 0.394 | N | 0.51 | SignalIP-TM  |
| gj_188519078.gb_ACD57023.1 | 0.16  | 27 | 0.24  | 21 | 0.563 | 9  | 0.418 | 0.324 | N | 0.57 | SignalP-noTM |
| gj_188519079.gb_ACD57024.1 | 0.173 | 24 | 0.157 | 24 | 0.225 | 6  | 0.159 | 0.158 | N | 0.57 | SignalP-noTM |
| gj_188519086.gb_ACD57031.1 | 0.131 | 10 | 0.104 | 11 | 0.144 | 1  | 0.108 | 0.105 | N | 0.51 | SignalIP-TM  |
| gj_188519501.gb_ACD57446.1 | 0.175 | 26 | 0.154 | 26 | 0.205 | 22 | 0.131 | 0.143 | N | 0.57 | SignalP-noTM |
| gj_188519504.gb_ACD57449.1 | 0.118 | 37 | 0.103 | 37 | 0.113 | 2  | 0.09  | 0.097 | N | 0.57 | SignalP-noTM |
| gj_188519515.gb_ACD57460.1 | 0.104 | 21 | 0.103 | 70 | 0.134 | 2  | 0.091 | 0.098 | N | 0.57 | SignalP-noTM |
| gj_188519516.gb_ACD57461.1 | 0.205 | 21 | 0.255 | 21 | 0.459 | 8  | 0.356 | 0.293 | N | 0.51 | SignalIP-TM  |
| gj_188519517.gb_ACD57462.1 | 0.7   | 22 | 0.801 | 22 | 0.956 | 11 | 0.919 | 0.857 | Y | 0.57 | SignalP-noTM |
| gj_188519521.gb_ACD57466.1 | 0.263 | 24 | 0.49  | 24 | 0.96  | 17 | 0.918 | 0.691 | Y | 0.57 | SignalP-noTM |
| gj_188519523.gb_ACD57468.1 | 0.32  | 20 | 0.284 | 20 | 0.456 | 18 | 0.274 | 0.279 | N | 0.57 | SignalP-noTM |
| gj_188519525.gb_ACD57470.1 | 0.29  | 22 | 0.497 | 22 | 0.929 | 10 | 0.846 | 0.661 | Y | 0.57 | SignalP-noTM |
| gj_188519526.gb_ACD57471.1 | 0.106 | 22 | 0.12  | 12 | 0.18  | 7  | 0.149 | 0.131 | N | 0.51 | SignalIP-TM  |
| gj_188519527.gb_ACD57472.1 | 0.147 | 15 | 0.27  | 15 | 0.804 | 11 | 0.513 | 0.385 | N | 0.57 | SignalP-noTM |
| gj_188519528.gb_ACD57473.1 | 0.111 | 23 | 0.148 | 11 | 0.376 | 1  | 0.2   | 0.173 | N | 0.57 | SignalP-noTM |
| gj_188519529.gb_ACD57474.1 | 0.099 | 26 | 0.194 | 11 | 0.465 | 2  | 0.383 | 0.283 | N | 0.57 | SignalP-noTM |
| gj_188519531.gb_ACD57476.1 | 0.169 | 34 | 0.125 | 11 | 0.178 | 1  | 0.155 | 0.139 | N | 0.57 | SignalP-noTM |
| gj_188519533.gb_ACD57478.1 | 0.224 | 30 | 0.196 | 30 | 0.267 | 29 | 0.178 | 0.187 | N | 0.57 | SignalP-noTM |
| gj_188519534.gb_ACD57479.1 | 0.311 | 26 | 0.2   | 26 | 0.248 | 22 | 0.112 | 0.159 | N | 0.57 | SignalP-noTM |

|          |          |          |          |                            |
|----------|----------|----------|----------|----------------------------|
| 0.961874 | 0.999549 | 0.888251 | 0.949891 | gj_188519571.gb_ACD57516.1 |
| 0.207346 | 0.512747 | 0.150077 | 0.290057 | gj_188519573.gb_ACD57518.1 |
| 0.093808 | 0.041806 | 0.157892 | 0.097835 | gj_188519578.gb_ACD57523.1 |
| 0.486503 | 0.467048 | 0.612065 | 0.523187 | gj_188519579.gb_ACD57524.1 |
| 0.919309 | 0.083862 | 0.891194 | 0.631455 | gj_188519586.gb_ACD57531.1 |
| 0.081137 | 0.062973 | 0.131587 | 0.091899 | gj_188519589.gb_ACD57534.1 |
| 0.705993 | 0.073033 | 0.773819 | 0.517615 | gj_188519590.gb_ACD57535.1 |
| 0.93015  | 0.998194 | 0.880902 | 0.936415 | gj_188519591.gb_ACD57536.1 |
| 0.147795 | 0.185126 | 0.131244 | 0.154722 | gj_188519593.gb_ACD57538.1 |
| 0.191081 | 0.26386  | 0.229347 | 0.228096 | gj_188519594.gb_ACD57539.1 |
| 0.279891 | 0.520239 | 0.287819 | 0.32625  | gj_188519601.gb_ACD57546.1 |
| 0.844881 | 0.984783 | 0.763145 | 0.86427  | gj_188519616.gb_ACD57561.1 |
| 0.161515 | 0.134354 | 0.185126 | 0.160332 | gj_188519623.gb_ACD57568.1 |
| 0.378716 | 0.256927 | 0.469289 | 0.368311 | gj_188519634.gb_ACD57579.1 |
| 0.097704 | 0.037579 | 0.126529 | 0.087271 | gj_188519640.gb_ACD57585.1 |
| 0.191081 | 0.884627 | 0.090545 | 0.388751 | gj_188519642.gb_ACD57587.1 |
| 0.075091 | 0.024941 | 0.111749 | 0.070594 | gj_188519644.gb_ACD57589.1 |
| 0.125209 | 0.00143  | 0.299643 | 0.142094 | gj_188519646.gb_ACD57591.1 |
| 0.302167 | 0.092541 | 0.199089 | 0.197932 | gj_188519651.gb_ACD57596.1 |
| 0.397235 | 0.134703 | 0.596283 | 0.376074 | gj_188519656.gb_ACD57601.1 |
| 0.348191 | 0.020432 | 0.443246 | 0.270623 | gj_188520140.gb_ACD58085.1 |
| 0.065131 | 0.189233 | 0.125868 | 0.126744 | gj_188520145.gb_ACD58090.1 |
| 0.150077 | 0.147041 | 0.14517  | 0.147429 | gj_188520146.gb_ACD58091.1 |
| 0.700987 | 0.998662 | 0.657236 | 0.785628 | gj_188520147.gb_ACD58092.1 |
| 0.19756  | 0.081361 | 0.159092 | 0.14007  | gj_188520152.gb_ACD58097.1 |
| 0.085724 | 0.054064 | 0.100924 | 0.080237 | gj_188520153.gb_ACD58098.1 |
| 0.842905 | 0.997006 | 0.694661 | 0.844857 | gj_188520161.gb_ACD58106.1 |
| 0.059861 | 0.019957 | 0.067358 | 0.049059 | gj_188520163.gb_ACD58108.1 |
| 0.949646 | 0.967105 | 0.907711 | 0.941487 | gj_188520164.gb_ACD58109.1 |
| 0.779026 | 0.897707 | 0.843301 | 0.840011 | gj_188520172.gb_ACD58117.1 |
| 0.181532 | 0.178433 | 0.157892 | 0.172619 | gj_188520174.gb_ACD58119.1 |
| 0.076988 | 0.492501 | 0.111155 | 0.226881 | gj_188520175               |

|                            |       |    |       |    |       |    |       |       |   |      |              |
|----------------------------|-------|----|-------|----|-------|----|-------|-------|---|------|--------------|
| gj_188519537.gb_ACD57482.1 | 0.133 | 22 | 0.158 | 22 | 0.292 | 11 | 0.194 | 0.175 | N | 0.57 | SignalP-noTM |
| gj_188519538.gb_ACD57483.1 | 0.314 | 29 | 0.529 | 29 | 0.948 | 19 | 0.875 | 0.692 | Y | 0.57 | SignalP-noTM |
| gj_188519540.gb_ACD57485.1 | 0.141 | 26 | 0.118 | 39 | 0.148 | 36 | 0.095 | 0.107 | N | 0.57 | SignalP-noTM |
| gj_188519546.gb_ACD57491.1 | 0.102 | 36 | 0.138 | 21 | 0.236 | 2  | 0.188 | 0.161 | N | 0.57 | SignalP-noTM |
| gj_188519548.gb_ACD57493.1 | 0.118 | 46 | 0.103 | 46 | 0.113 | 43 | 0.088 | 0.096 | N | 0.57 | SignalP-noTM |
| gj_188519549.gb_ACD57494.1 | 0.206 | 21 | 0.439 | 21 | 0.959 | 16 | 0.928 | 0.669 | Y | 0.57 | SignalP-noTM |
| gj_188519551.gb_ACD57496.1 | 0.104 | 37 | 0.125 | 15 | 0.198 | 9  | 0.153 | 0.138 | N | 0.57 | SignalP-noTM |
| gj_188519552.gb_ACD57497.1 | 0.28  | 24 | 0.164 | 24 | 0.13  | 46 | 0.086 | 0.127 | N | 0.57 | SignalP-noTM |
| gj_188519554.gb_ACD57499.1 | 0.118 | 44 | 0.132 | 32 | 0.207 | 3  | 0.15  | 0.14  | N | 0.57 | SignalP-noTM |
| gj_188519555.gb_ACD57500.1 | 0.311 | 26 | 0.501 | 26 | 0.942 | 4  | 0.87  | 0.674 | Y | 0.57 | SignalP-noTM |
| gj_188519564.gb_ACD57509.1 | 0.124 | 20 | 0.132 | 25 | 0.178 | 34 | 0.125 | 0.129 | N | 0.57 | SignalP-noTM |
| gj_188519565.gb_ACD57510.1 | 0.106 | 7  | 0.132 | 11 | 0.23  | 3  | 0.18  | 0.155 | N | 0.57 | SignalP-noTM |
| gj_188519571.gb_ACD57516.1 | 0.349 | 21 | 0.476 | 21 | 0.925 | 11 | 0.642 | 0.554 | N | 0.57 | SignalP-noTM |
| gj_188519573.gb_ACD57518.1 | 0.874 | 23 | 0.903 | 23 | 0.967 | 19 | 0.922 | 0.912 | Y | 0.57 | SignalP-noTM |
| gj_188519578.gb_ACD57523.1 | 0.158 | 33 | 0.185 | 33 | 0.361 | 16 | 0.208 | 0.196 | N | 0.57 | SignalP-noTM |
| gj_188519579.gb_ACD57524.1 | 0.106 | 50 | 0.102 | 60 | 0.143 | 1  | 0.093 | 0.098 | N | 0.57 | SignalP-noTM |
| gj_188519586.gb_ACD57531.1 | 0.113 | 21 | 0.118 | 21 | 0.138 | 9  | 0.101 | 0.11  | N | 0.57 | SignalP-noTM |
| gj_188519589.gb_ACD57534.1 | 0.118 | 36 | 0.097 | 36 | 0.096 | 31 | 0.068 | 0.083 | N | 0.57 | SignalP-noTM |
| gj_188519590.gb_ACD57535.1 | 0.242 | 23 | 0.36  | 23 | 0.881 | 2  | 0.641 | 0.492 | N | 0.57 | SignalP-noTM |
| gj_188519591.gb_ACD57536.1 | 0.268 | 18 | 0.486 | 18 | 0.915 | 1  | 0.889 | 0.675 | Y | 0.57 | SignalP-noTM |
| gj_188519593.gb_ACD57538.1 | 0.135 | 22 | 0.153 | 18 | 0.25  | 4  | 0.202 | 0.171 | N | 0.51 | SignalP-TM   |
| gj_188519594.gb_ACD57539.1 | 0.125 | 68 | 0.13  | 12 | 0.205 | 11 | 0.167 | 0.147 | N | 0.57 | SignalP-noTM |
| gj_188519601.gb_ACD57546.1 | 0.145 | 23 | 0.152 | 23 | 0.355 | 2  | 0.18  | 0.165 | N | 0.57 | SignalP-noTM |
| gj_188519616.gb_ACD57561.1 | 0.154 | 24 | 0.175 | 24 | 0.324 | 4  | 0.199 | 0.186 | N | 0.57 | SignalP-noTM |
| gj_188519623.gb_ACD57568.1 | 0.477 | 60 | 0.293 | 60 | 0.57  | 23 | 0.248 | 0.276 | N | 0.51 | SignalP-TM   |
| gj_188519634.gb_ACD57579.1 | 0.135 | 22 | 0.195 | 22 | 0.358 | 20 | 0.253 | 0.222 | N | 0.57 | SignalP-noTM |
| gj_188519640.gb_ACD57585.1 | 0.231 | 43 | 0.176 | 43 | 0.218 | 42 | 0.11  | 0.145 | N | 0.57 | SignalP-noTM |
| gj_188519642.gb_ACD57587.1 | 0.17  | 37 | 0.159 | 37 | 0.371 | 34 | 0.144 | 0.152 | N | 0.57 | SignalP-noTM |
| gj_188519644.gb_ACD57589.1 | 0.103 | 24 | 0.108 | 11 | 0.163 | 2  | 0.114 | 0.111 | N | 0.57 | SignalP-noTM |
| gj_188519646.gb_ACD57591.1 | 0.506 | 24 | 0.452 | 24 | 0.529 | 15 | 0.401 | 0.428 | N | 0.57 | SignalP-noTM |
| gj_188519651.gb_ACD57596.1 | 0.127 | 23 | 0.183 | 23 | 0.338 | 17 | 0.239 | 0.209 | N | 0.57 | SignalP-noTM |
| gj_188519656.gb_ACD57601.1 | 0.107 | 52 | 0.107 | 69 | 0.143 | 67 | 0.086 | 0.099 | N | 0.51 | SignalP-TM   |
| gj_188520140.gb_ACD58085.1 | 0.106 | 3  | 0.098 | 41 | 0.105 | 31 | 0.086 | 0.093 | N | 0.57 | SignalP-noTM |
| gj_188520145.gb_ACD58090.1 | 0.135 | 5  | 0.138 | 12 | 0.222 | 4  | 0.167 | 0.149 | N | 0.51 | SignalP-TM   |
| gj_188520146.gb_ACD58091.1 | 0.104 | 49 | 0.126 | 13 | 0.196 | 6  | 0.161 | 0.143 | N | 0.57 | SignalP-noTM |
| gj_188520147.gb_ACD58092.1 | 0.157 | 22 | 0.185 | 22 | 0.247 | 16 | 0.207 | 0.195 | N | 0.57 | SignalP-noTM |
| gj_188520152.gb_ACD58097.1 | 0.142 | 29 | 0.12  | 17 | 0.184 | 9  | 0.141 | 0.128 | N | 0.51 | SignalP-TM   |
| gj_188520153.gb_ACD58098.1 | 0.126 | 34 | 0.101 | 34 | 0.098 | 35 | 0.07  | 0.087 | N | 0.57 | SignalP-noTM |
| gj_188520161.gb_ACD58106.1 | 0.123 | 30 | 0.127 | 11 | 0.191 | 1  | 0.165 | 0.145 | N | 0.57 | SignalP-noTM |
| gj_188520163.gb_ACD58108.1 | 0.122 | 20 | 0.129 | 25 | 0.168 | 34 | 0.12  | 0.125 | N | 0.57 | SignalP-noTM |
| gj_188520164.gb_ACD58109.1 | 0.141 | 68 | 0.12  | 68 | 0.158 | 2  | 0.108 | 0.115 | N | 0.57 | SignalP-noTM |
| gj_188520172.gb_ACD58117.1 | 0.115 | 22 | 0.146 | 13 | 0.277 | 9  | 0.213 | 0.177 | N | 0.57 | SignalP-noTM |
| gj_188520174.gb_ACD58119.1 | 0.371 | 21 | 0.235 | 21 | 0.202 | 18 | 0.145 | 0.192 | N | 0.57 | SignalP-noTM |
| gj_188520175.gb_ACD58120.1 | 0.102 | 17 | 0.111 | 11 | 0.159 | 7  | 0.129 | 0.118 | N | 0.51 | SignalP-TM   |
| gj_188520176.gb_ACD58121.1 | 0.11  | 28 | 0.123 | 11 | 0.184 | 9  | 0.163 | 0.142 | N | 0.57 | SignalP-noTM |
| gj_188520182.gb_ACD58127.1 | 0.151 | 24 | 0.242 | 24 | 0.665 | 23 | 0.432 | 0.332 | N | 0.57 | SignalP-noTM |
| gj_188520183.gb_ACD58128.1 | 0.1   | 3  | 0.1   | 36 | 0.118 | 1  | 0.087 | 0.094 | N | 0.57 | SignalP-noTM |
| gj_188520184.gb_ACD58129.1 | 0.19  | 41 | 0.199 | 41 | 0.409 | 40 | 0.132 | 0.167 | N | 0.57 | SignalP-noTM |
| gj_188520185.gb_ACD58130.1 | 0.108 | 34 | 0.112 | 11 | 0.181 | 4  | 0.126 | 0.119 | N | 0.57 | SignalP-noTM |
| gj_188520186.gb_ACD58131.1 | 0.183 | 45 | 0.171 | 45 | 0.242 | 41 | 0.109 | 0.148 | N | 0.51 | SignalP-TM   |
| gj_188520192.gb_ACD58137.1 | 0.112 | 18 | 0.127 | 18 | 0.228 | 13 | 0.134 | 0.13  | N | 0.57 | SignalP-noTM |
| gj_188520197.gb_ACD58142.1 | 0.111 | 20 | 0.103 | 20 | 0.13  | 12 | 0.089 | 0.097 | N | 0.57 | SignalP-noTM |
| gj_188520198.gb_ACD58143.1 | 0.222 | 20 | 0.213 | 20 | 0.269 | 12 | 0.209 | 0.211 | N | 0.57 | SignalP-noTM |
| gj_188520199.gb_ACD58144.1 | 0.113 | 30 | 0.127 | 11 | 0.225 | 2  | 0.151 | 0.138 | N | 0.57 | SignalP-noTM |
| gj_188520200.gb_ACD58145.1 | 0.158 | 57 | 0.127 | 57 | 0.128 | 22 | 0.088 | 0.109 | N | 0.57 | SignalP-noTM |
| gj_188520201.gb_ACD58146.1 | 0.113 | 25 | 0.207 | 14 | 0.563 | 5  | 0.419 | 0.307 | N | 0.57 | SignalP-noTM |
| gj_188520202.gb_ACD58147.1 | 0.62  | 24 | 0.751 | 24 | 0.944 | 18 | 0.905 | 0.823 | Y | 0.57 | SignalP-noTM |
| gj_188520204.gb_ACD58149.1 | 0.887 | 22 | 0.907 | 22 | 0.974 | 11 | 0.924 | 0.915 | Y | 0.57 | SignalP-noTM |
| gj_188520207.gb_ACD58152.1 | 0.407 | 21 | 0.615 | 21 | 0.967 | 13 | 0.927 | 0.762 | Y | 0.57 | SignalP-noTM |
| gj_188520208.gb_ACD58153.1 | 0.144 | 21 | 0.101 | 21 | 0.107 | 70 | 0.065 | 0.084 | N | 0.57 | SignalP-noTM |
| gj_188520210.gb_ACD58155.1 | 0.294 | 10 | 0.11  | 16 | 0.172 | 9  | 0.116 | 0.112 | N | 0.57 | SignalP-noTM |
| gj_188520211.gb_ACD58156.1 | 0.18  | 44 | 0.132 | 44 | 0.185 | 5  | 0.106 | 0.12  | N | 0.57 | SignalP-noTM |
| gj_188520212.gb_ACD58157.1 | 0.196 | 54 | 0.137 | 54 | 0.185 | 3  | 0.106 | 0.122 | N | 0.57 | SignalP-noTM |
| gj_188520213.gb_ACD58158.1 | 0.124 | 23 | 0.128 | 23 | 0.247 | 49 | 0.134 | 0.131 | N | 0.57 | SignalP-noTM |
| gj_188520214.gb_ACD58159.1 | 0.199 | 24 | 0.177 | 24 | 0.315 | 31 | 0.14  | 0.16  | N | 0.57 | SignalP-noTM |
| gj_188520216.gb_ACD58161.1 | 0.117 | 60 | 0.12  | 60 | 0.193 | 2  | 0.115 | 0.118 | N | 0.57 | SignalP-noTM |
| gj_188520217.gb_ACD58162.1 | 0.154 | 44 | 0.127 | 44 | 0.18  | 42 | 0.1   | 0.114 | N | 0.57 | SignalP-noTM |
| gj_188520221.gb_ACD58166.1 | 0.132 | 50 | 0.176 | 41 | 0.422 | 40 | 0.222 | 0.198 | N | 0.57 | SignalP-noTM |
| gj_188520227.gb_ACD58172.1 | 0.101 | 32 | 0.152 | 24 | 0.272 | 18 | 0.215 | 0.182 | N | 0.57 | SignalP-noTM |
| gj_188520239.gb_ACD58184.1 | 0.108 | 32 | 0.13  | 53 | 0.207 | 43 | 0.145 | 0.137 | N | 0.57 | SignalP-noTM |
| gj_188520247.gb_ACD58192.1 | 0.128 | 26 | 0.104 | 26 | 0.126 | 2  | 0.09  | 0.097 | N | 0.57 | SignalP-noTM |
| gj_188520248.gb_ACD58193.1 | 0.108 | 48 | 0.103 | 48 | 0.139 | 6  | 0.103 | 0.103 | N | 0.57 | SignalP-noTM |
| gj_188520249.gb_ACD58194.1 | 0.178 | 22 | 0.23  | 41 | 0.573 | 35 | 0.247 | 0.236 | N | 0.51 | SignalP-TM   |
| gj_188520250.gb_ACD58195.1 | 0.105 | 37 | 0.099 | 16 | 0.12  | 7  | 0.095 | 0.097 | N | 0.57 | SignalP-noTM |
| gj_188520252.gb_ACD58197.1 | 0.119 | 18 | 0.111 | 18 | 0.144 | 13 | 0.105 | 0.108 | N | 0.57 | SignalP-noTM |
| gj_188520253.gb_ACD58198.1 | 0.196 | 21 | 0.164 | 21 | 0.214 | 3  | 0.156 | 0.16  | N | 0.57 | SignalP-noTM |
| gj_188520254.gb_ACD58199.1 | 0.122 | 31 | 0.16  | 26 | 0.289 | 3  | 0.201 | 0.179 | N | 0.57 | SignalP-noTM |
| gj_188520255.gb_ACD58200.1 | 0.215 | 29 | 0.178 | 29 | 0.33  | 28 | 0.138 | 0.159 | N | 0.57 | SignalP-noTM |

|          |          |          |          |                            |
|----------|----------|----------|----------|----------------------------|
| 0.447692 | 0.722521 | 0.603483 | 0.591232 | gj_188520753.gb_ACD58698.1 |
| 0.167702 | 0.138238 | 0.152387 | 0.152776 | gj_188520754.gb_ACD58699.1 |
| 0.078493 | 0.03068  | 0.124227 | 0.0778   | gj_188520756.gb_ACD58701.1 |
| 0.132964 | 0.400832 | 0.227233 | 0.253676 | gj_188520757.gb_ACD58702.1 |
| 0.094063 | 0.302167 | 0.149694 | 0.181975 | gj_188520758.gb_ACD58703.1 |
| 0.911412 | 0.994257 | 0.922799 | 0.942823 | gj_188520759.gb_ACD58704.1 |
| 0.946242 | 0.999662 | 0.915444 | 0.953883 | gj_188520760.gb_ACD58705.1 |
| 0.946869 | 0.896321 | 0.885543 | 0.909521 | gj_188520761.gb_ACD58706.1 |
| 0.144798 | 0.368188 | 0.155119 | 0.222702 | gj_188520766.gb_ACD58711.1 |
| 0.482008 | 0.187399 | 0.604201 | 0.242536 | gj_188520767.gb_ACD58712.1 |
| 0.123251 | 0.130562 | 0.177994 | 0.143936 | gj_188520768.gb_ACD58713.1 |
| 0.163147 | 0.026597 | 0.250115 | 0.14662  | gj_188520773.gb_ACD58718.1 |
| 0.200528 | 0.119413 | 0.257501 | 0.192481 | gj_188520781.gb_ACD58726.1 |
| 0.157493 | 0.14295  | 0.156699 | 0.152381 | gj_188520782.gb_ACD58727.1 |
| 0.200047 | 0.124227 | 0.227233 | 0.183836 | gj_188520783.gb_ACD58728.1 |
| 0.151228 | 0.140035 | 0.100381 | 0.130548 | gj_188520784.gb_ACD58729.1 |
| 0.737884 | 0.987519 | 0.894919 | 0.873441 | gj_188520785.gb_ACD58730.1 |
| 0.122927 | 0.067358 | 0.112946 | 0.101077 | gj_188520786.gb_ACD58731.1 |
| 0.113247 | 0.075718 | 0.116912 | 0.101959 | gj_188520788.gb_ACD58733.1 |
| 0.1803   | 0.137881 | 0.171505 | 0.156562 | gj_188520789.gb_ACD58734.1 |
| 0.229878 | 0.073033 | 0.224088 | 0.175666 | gj_188520790.gb_ACD58735.1 |
| 0.057055 | 0.02271  | 0.069655 | 0.049807 | gj_188520791.gb_ACD58736.1 |
| 0.114457 | 0.086669 | 0.112047 | 0.104391 | gj_188520792.gb_ACD58737.1 |
| 0.111452 | 0.062094 | 0.164379 | 0.112642 | gj_188520793.gb_ACD58738.1 |
| 0.186943 | 0.00809  | 0.238486 | 0.144506 | gj_188520794.gb_ACD58739.1 |
| 0.076988 | 0.032895 | 0.123251 | 0.077711 | gj_188520795.gb_ACD58740.1 |
| 0.134354 | 0.103123 | 0.185579 | 0.141019 | gj_188520796.gb_ACD58741.1 |
| 0.410234 | 0.079805 | 0.157992 | 0.33601  | gj_188520797.gb_ACD58742.1 |
| 0.072024 | 0.033569 | 0.082262 | 0.062618 | gj_188520798.gb_ACD58743.1 |
| 0.749885 | 0.930539 | 0.838485 | 0.839636 | gj_188521287.gb_ACD59232.1 |
| 0.087145 | 0.003375 | 0.130222 | 0.073581 | gj_188521289.gb_ACD59234.1 |
| 0.173847 | 0.050211 | 0.248991 | 0.157616 | gj_188521294.gb_ACD59239.1 |
| 0.13331  | 0.043025 | 0.158691 | 0.111675 | gj_188521296.gb_ACD59241.1 |
| 0.885543 | 0.90670  |          |          |                            |



|                            |       |    |       |    |       |    |       |       |   |      |              |
|----------------------------|-------|----|-------|----|-------|----|-------|-------|---|------|--------------|
| gi_188520256_gb_ACD582011_ | 0.121 | 61 | 0.121 | 19 | 0.159 | 13 | 0.124 | 0.122 | N | 0.57 | SignalP-noTM |
| gi_188520722_gb_ACD586671_ | 0.121 | 23 | 0.113 | 23 | 0.128 | 11 | 0.1   | 0.107 | N | 0.57 | SignalP-noTM |
| gi_188520723_gb_ACD586681_ | 0.131 | 7  | 0.214 | 22 | 0.482 | 14 | 0.332 | 0.269 | N | 0.57 | SignalP-noTM |
| gi_188520727_gb_ACD586721_ | 0.121 | 41 | 0.12  | 15 | 0.185 | 5  | 0.141 | 0.13  | N | 0.57 | SignalP-noTM |
| gi_188520732_gb_ACD586771_ | 0.132 | 25 | 0.154 | 25 | 0.244 | 16 | 0.186 | 0.169 | N | 0.57 | SignalP-noTM |
| gi_188520734_gb_ACD586791_ | 0.145 | 30 | 0.195 | 20 | 0.392 | 16 | 0.31  | 0.249 | N | 0.57 | SignalP-noTM |
| gi_188520735_gb_ACD586801_ | 0.183 | 15 | 0.153 | 15 | 0.253 | 1  | 0.144 | 0.149 | N | 0.57 | SignalP-noTM |
| gi_188520740_gb_ACD586851_ | 0.101 | 41 | 0.137 | 11 | 0.286 | 2  | 0.18  | 0.157 | N | 0.57 | SignalP-noTM |
| gi_188520743_gb_ACD586881_ | 0.112 | 50 | 0.12  | 41 | 0.179 | 36 | 0.12  | 0.12  | N | 0.57 | SignalP-noTM |
| gi_188520747_gb_ACD586921_ | 0.115 | 22 | 0.146 | 13 | 0.28  | 9  | 0.215 | 0.178 | N | 0.57 | SignalP-noTM |
| gi_188520748_gb_ACD586931_ | 0.114 | 67 | 0.106 | 43 | 0.137 | 10 | 0.101 | 0.104 | N | 0.57 | SignalP-noTM |
| gi_188520751_gb_ACD586961_ | 0.112 | 42 | 0.126 | 12 | 0.231 | 4  | 0.163 | 0.143 | N | 0.57 | SignalP-noTM |
| gi_188520753_gb_ACD586981_ | 0.827 | 22 | 0.849 | 22 | 0.934 | 7  | 0.893 | 0.87  | Y | 0.57 | SignalP-noTM |
| gi_188520754_gb_ACD586991_ | 0.123 | 38 | 0.104 | 38 | 0.109 | 35 | 0.08  | 0.093 | N | 0.57 | SignalP-noTM |
| gi_188520756_gb_ACD587011_ | 0.281 | 27 | 0.211 | 27 | 0.341 | 9  | 0.206 | 0.209 | N | 0.57 | SignalP-noTM |
| gi_188520757_gb_ACD587021_ | 0.122 | 38 | 0.174 | 20 | 0.383 | 12 | 0.249 | 0.202 | N | 0.51 | SignalP-TM   |
| gi_188520758_gb_ACD587031_ | 0.141 | 57 | 0.113 | 33 | 0.155 | 25 | 0.096 | 0.107 | N | 0.51 | SignalP-TM   |
| gi_188520759_gb_ACD587041_ | 0.552 | 21 | 0.709 | 21 | 0.958 | 4  | 0.923 | 0.809 | Y | 0.57 | SignalP-noTM |
| gi_188520760_gb_ACD587051_ | 0.854 | 25 | 0.904 | 25 | 0.974 | 21 | 0.944 | 0.923 | Y | 0.57 | SignalP-noTM |
| gi_188520761_gb_ACD587061_ | 0.723 | 24 | 0.803 | 24 | 0.955 | 9  | 0.913 | 0.854 | Y | 0.57 | SignalP-noTM |
| gi_188520766_gb_ACD587111_ | 0.206 | 58 | 0.166 | 58 | 0.179 | 54 | 0.121 | 0.145 | N | 0.57 | SignalP-noTM |
| gi_188520767_gb_ACD587121_ | 0.135 | 50 | 0.114 | 50 | 0.165 | 49 | 0.081 | 0.098 | N | 0.57 | SignalP-noTM |
| gi_188520768_gb_ACD587131_ | 0.122 | 67 | 0.112 | 11 | 0.158 | 1  | 0.12  | 0.116 | N | 0.57 | SignalP-noTM |
| gi_188520773_gb_ACD587181_ | 0.157 | 47 | 0.146 | 47 | 0.182 | 44 | 0.125 | 0.136 | N | 0.57 | SignalP-noTM |
| gi_188520781_gb_ACD587261_ | 0.149 | 20 | 0.159 | 11 | 0.375 | 1  | 0.247 | 0.192 | N | 0.51 | SignalP-TM   |
| gi_188520782_gb_ACD587271_ | 0.12  | 53 | 0.187 | 20 | 0.545 | 14 | 0.323 | 0.251 | N | 0.57 | SignalP-noTM |
| gi_188520783_gb_ACD587281_ | 0.162 | 53 | 0.139 | 18 | 0.347 | 1  | 0.152 | 0.146 | N | 0.57 | SignalP-noTM |
| gi_188520784_gb_ACD587291_ | 0.118 | 60 | 0.114 | 15 | 0.179 | 9  | 0.115 | 0.114 | N | 0.57 | SignalP-noTM |
| gi_188520785_gb_ACD587301_ | 0.1   | 36 | 0.142 | 11 | 0.256 | 1  | 0.199 | 0.169 | N | 0.57 | SignalP-noTM |
| gi_188520786_gb_ACD587311_ | 0.137 | 22 | 0.167 | 22 | 0.307 | 1  | 0.197 | 0.178 | N | 0.51 | SignalP-TM   |
| gi_188520788_gb_ACD587331_ | 0.151 | 54 | 0.112 | 54 | 0.108 | 32 | 0.074 | 0.094 | N | 0.57 | SignalP-noTM |
| gi_188520789_gb_ACD587341_ | 0.117 | 54 | 0.12  | 20 | 0.169 | 9  | 0.122 | 0.121 | N | 0.51 | SignalP-TM   |
| gi_188520790_gb_ACD587351_ | 0.165 | 57 | 0.162 | 12 | 0.382 | 1  | 0.249 | 0.194 | N | 0.51 | SignalP-TM   |
| gi_188520791_gb_ACD587361_ | 0.235 | 22 | 0.151 | 22 | 0.14  | 19 | 0.09  | 0.123 | N | 0.57 | SignalP-noTM |
| gi_188520792_gb_ACD587371_ | 0.105 | 49 | 0.104 | 34 | 0.128 | 5  | 0.102 | 0.103 | N | 0.57 | SignalP-noTM |
| gi_188520793_gb_ACD587381_ | 0.112 | 25 | 0.113 | 37 | 0.149 | 28 | 0.09  | 0.102 | N | 0.57 | SignalP-noTM |
| gi_188520794_gb_ACD587391_ | 0.156 | 26 | 0.178 | 26 | 0.309 | 18 | 0.192 | 0.185 | N | 0.57 | SignalP-noTM |
| gi_188520795_gb_ACD587401_ | 0.133 | 34 | 0.135 | 34 | 0.212 | 31 | 0.12  | 0.128 | N | 0.57 | SignalP-noTM |
| gi_188520796_gb_ACD587411_ | 0.173 | 16 | 0.17  | 11 | 0.58  | 1  | 0.25  | 0.2   | N | 0.51 | SignalP-TM   |
| gi_188520797_gb_ACD587421_ | 0.128 | 25 | 0.138 | 55 | 0.217 | 51 | 0.123 | 0.132 | N | 0.51 | SignalP-TM   |
| gi_188520798_gb_ACD587431_ | 0.205 | 48 | 0.193 | 48 | 0.235 | 40 | 0.126 | 0.162 | N | 0.57 | SignalP-noTM |
| gi_188521287_gb_ACD592321_ | 0.115 | 22 | 0.146 | 13 | 0.278 | 9  | 0.213 | 0.178 | N | 0.57 | SignalP-noTM |
| gi_188521289_gb_ACD592341_ | 0.159 | 26 | 0.113 | 26 | 0.131 | 41 | 0.075 | 0.096 | N | 0.57 | SignalP-noTM |
| gi_188521294_gb_ACD592391_ | 0.116 | 53 | 0.129 | 11 | 0.219 | 1  | 0.165 | 0.146 | N | 0.57 | SignalP-noTM |
| gi_188521296_gb_ACD592411_ | 0.104 | 47 | 0.104 | 53 | 0.179 | 44 | 0.089 | 0.097 | N | 0.57 | SignalP-noTM |
| gi_188521301_gb_ACD592461_ | 0.118 | 65 | 0.179 | 11 | 0.427 | 3  | 0.325 | 0.248 | N | 0.57 | SignalP-noTM |
| gi_188521304_gb_ACD592491_ | 0.131 | 21 | 0.17  | 21 | 0.392 | 3  | 0.249 | 0.207 | N | 0.57 | SignalP-noTM |
| gi_188521306_gb_ACD592511_ | 0.114 | 67 | 0.106 | 43 | 0.137 | 10 | 0.101 | 0.104 | N | 0.57 | SignalP-noTM |
| gi_188521336_gb_ACD592811_ | 0.108 | 48 | 0.103 | 48 | 0.139 | 6  | 0.103 | 0.103 | N | 0.57 | SignalP-noTM |
| gi_188521345_gb_ACD592901_ | 0.197 | 26 | 0.191 | 26 | 0.363 | 22 | 0.215 | 0.202 | N | 0.57 | SignalP-noTM |
| gi_188521400_gb_ACD593451_ | 0.131 | 40 | 0.104 | 64 | 0.126 | 9  | 0.091 | 0.098 | N | 0.57 | SignalP-noTM |
| gi_188521473_gb_ACD594181_ | 0.184 | 28 | 0.134 | 28 | 0.12  | 1  | 0.098 | 0.117 | N | 0.57 | SignalP-noTM |
| gi_188521501_gb_ACD594461_ | 0.105 | 45 | 0.105 | 51 | 0.172 | 42 | 0.087 | 0.097 | N | 0.57 | SignalP-noTM |
| gi_188521503_gb_ACD594481_ | 0.108 | 48 | 0.103 | 35 | 0.14  | 6  | 0.104 | 0.103 | N | 0.57 | SignalP-noTM |
| gi_188521505_gb_ACD594501_ | 0.147 | 23 | 0.113 | 23 | 0.207 | 1  | 0.124 | 0.127 | N | 0.57 | SignalP-noTM |
| gi_188521506_gb_ACD594511_ | 0.128 | 46 | 0.181 | 14 | 0.38  | 10 | 0.327 | 0.25  | N | 0.57 | SignalP-noTM |
| gi_188521507_gb_ACD594521_ | 0.136 | 56 | 0.172 | 11 | 0.436 | 3  | 0.285 | 0.226 | N | 0.57 | SignalP-noTM |
| gi_188521508_gb_ACD594531_ | 0.121 | 31 | 0.123 | 11 | 0.243 | 4  | 0.152 | 0.136 | N | 0.57 | SignalP-noTM |
| gi_188521509_gb_ACD594541_ | 0.105 | 4  | 0.143 | 11 | 0.25  | 1  | 0.207 | 0.173 | N | 0.57 | SignalP-noTM |
| gi_188521510_gb_ACD594551_ | 0.105 | 21 | 0.102 | 45 | 0.112 | 30 | 0.092 | 0.097 | N | 0.57 | SignalP-noTM |
| gi_188521514_gb_ACD594591_ | 0.105 | 30 | 0.106 | 11 | 0.158 | 1  | 0.104 | 0.105 | N | 0.57 | SignalP-noTM |
| gi_188521515_gb_ACD594601_ | 0.391 | 30 | 0.281 | 30 | 0.346 | 19 | 0.222 | 0.253 | N | 0.57 | SignalP-noTM |
| gi_188521516_gb_ACD594611_ | 0.111 | 51 | 0.144 | 11 | 0.278 | 2  | 0.211 | 0.169 | N | 0.51 | SignalP-TM   |
| gi_188521517_gb_ACD594621_ | 0.637 | 30 | 0.404 | 30 | 0.492 | 28 | 0.242 | 0.328 | N | 0.57 | SignalP-noTM |
| gi_188521518_gb_ACD594631_ | 0.368 | 51 | 0.505 | 51 | 0.894 | 45 | 0.378 | 0.445 | N | 0.57 | SignalP-noTM |
| gi_188521519_gb_ACD594641_ | 0.102 | 29 | 0.124 | 11 | 0.246 | 3  | 0.151 | 0.137 | N | 0.57 | SignalP-noTM |
| gi_188521520_gb_ACD594651_ | 0.144 | 30 | 0.114 | 30 | 0.11  | 2  | 0.085 | 0.101 | N | 0.57 | SignalP-noTM |
| gi_188521521_gb_ACD594661_ | 0.116 | 34 | 0.109 | 19 | 0.153 | 9  | 0.108 | 0.109 | N | 0.57 | SignalP-noTM |
| gi_188521522_gb_ACD594671_ | 0.516 | 29 | 0.689 | 29 | 0.985 | 16 | 0.918 | 0.797 | Y | 0.57 | SignalP-noTM |
| gi_188521523_gb_ACD594681_ | 0.87  | 22 | 0.898 | 22 | 0.941 | 18 | 0.911 | 0.904 | Y | 0.57 | SignalP-noTM |
| gi_188521529_gb_ACD594741_ | 0.226 | 19 | 0.273 | 19 | 0.585 | 17 | 0.334 | 0.302 | N | 0.57 | SignalP-noTM |
| gi_188521531_gb_ACD594761_ | 0.129 | 33 | 0.162 | 54 | 0.382 | 46 | 0.135 | 0.149 | N | 0.57 | SignalP-noTM |
| gi_188521535_gb_ACD594801_ | 0.111 | 9  | 0.106 | 68 | 0.124 | 62 | 0.09  | 0.098 | N | 0.57 | SignalP-noTM |
| gi_188521537_gb_ACD594821_ | 0.111 | 34 | 0.137 | 11 | 0.281 | 1  | 0.179 | 0.157 | N | 0.57 | SignalP-noTM |
| gi_188521538_gb_ACD594831_ | 0.177 | 64 | 0.137 | 50 | 0.245 | 42 | 0.136 | 0.137 | N | 0.57 | SignalP-noTM |
| gi_188521539_gb_ACD594841_ | 0.162 | 19 | 0.119 | 11 | 0.225 | 1  | 0.133 | 0.126 | N | 0.57 | SignalP-noTM |
| gi_188521543_gb_ACD594881_ | 0.789 | 29 | 0.77  | 29 | 0.923 | 24 | 0.805 | 0.786 | Y | 0.57 | SignalP-noTM |
| gi_188521554_gb_ACD594991_ | 0.148 | 18 | 0.172 | 11 | 0.441 | 1  | 0.277 | 0.211 | N | 0.51 | SignalP-TM   |

|          |          |          |          |                            |
|----------|----------|----------|----------|----------------------------|
| 0.442505 | 0.978773 | 0.647028 | 0.689435 | gi_188521576_gb_ACD595211_ |
| 0.219428 | 0.128532 | 0.090052 | 0.146004 | gi_188521577_gb_ACD595221_ |
| 0.194348 | 0.476767 | 0.10736  | 0.259492 | gi_188521578_gb_ACD595231_ |
| 0.150896 | 0.222008 | 0.126529 | 0.169478 | gi_188521582_gb_ACD595271_ |
| 0.128532 | 0.312383 | 0.219943 | 0.220286 | gi_188521585_gb_ACD595301_ |
| 0.080913 | 0.50375  | 0.174509 | 0.253057 | gi_188521588_gb_ACD595331_ |
| 0.361237 | 0.035778 | 0.481259 | 0.292758 | gi_188521589_gb_ACD595341_ |
| 0.38367  | 0.141122 | 0.49325  | 0.339347 | gi_188521590_gb_ACD595351_ |
| 0.178314 | 0.078928 | 0.143318 | 0.133853 | gi_188521591_gb_ACD595361_ |
| 0.094063 | 0.061399 | 0.129882 | 0.095115 | gi_188521594_gb_ACD595391_ |
| 0.09639  | 0.050931 | 0.130562 | 0.092628 | gi_188521600_gb_ACD595451_ |
| 0.08883  | 0.051368 | 0.109097 | 0.083098 | gi_188521601_gb_ACD595461_ |
| 0.171079 | 0.046486 | 0.210818 | 0.142794 | gi_188521602_gb_ACD595471_ |
| 0.831502 | 0.852205 | 0.844487 | 0.876065 | gi_188521603_gb_ACD595481_ |
| 0.201491 | 0.049642 | 0.118157 | 0.123097 | gi_188521604_gb_ACD595491_ |
| 0.949069 | 0.999375 | 0.910926 | 0.953123 | gi_188521605_gb_ACD595501_ |
| 0.201009 | 0.236855 | 0.145916 | 0.194593 | gi_188521606_gb_ACD595511_ |
| 0.14629  | 0.02401  | 0.179756 | 0.116685 | gi_188521607_gb_ACD595521_ |
| 0.139314 | 0.010761 | 0.143687 | 0.097921 | gi_188521632_gb_ACD595771_ |
| 0.114153 | 0.057216 | 0.20538  | 0.125583 | gi_188521639_gb_ACD595841_ |
| 0.163557 | 0.137525 | 0.111452 | 0.137511 | gi_188521649_gb_ACD595941_ |
| 0.232544 | 0.139314 | 0.147795 | 0.173218 | gi_188521650_gb_ACD595951_ |
| 0.332034 | 0.039925 | 0.400832 | 0.257597 | gi_188521651_gb_ACD595961_ |
| 0.082944 | 0.097969 | 0.165619 | 0.115511 | gi_188521656_gb_ACD596011_ |
| 0.095609 | 0.188314 | 0.188773 | 0.157565 | gi_188521657_gb_ACD596021_ |
| 0.350854 | 0.958073 | 0.49325  | 0.603726 | gi_188521658_gb_ACD596031_ |
| 0.350236 | 0.042778 | 0.234154 | 0.209056 | gi_188521664_gb_ACD596091_ |
| 0.30789  | 0.974913 | 0.185126 | 0.48991  | gi_188521665_gb_ACD596101_ |
| 0.078988 | 0.001287 | 0.119413 | 0.065896 | gi_188521677_gb_ACD596221_ |
| 0.09630  | 0.09639  | 0.196708 | 0.129829 | gi_188521678_gb_ACD596231_ |
| 0.704746 | 0.029974 | 0.671284 | 0.468668 | gi_188521679_gb_ACD596241_ |
| 0.586235 | 0.041297 | 0.520988 | 0.373717 | gi_188521681_gb_ACD5       |



|                            |       |    |       |    |       |    |       |       |   |      |              |
|----------------------------|-------|----|-------|----|-------|----|-------|-------|---|------|--------------|
| gi_188521745_gb_ACD59690.1 | 0.169 | 21 | 0.123 | 56 | 0.136 | 51 | 0.1   | 0.112 | N | 0.57 | SignalP-noTM |
| gi_188521746_gb_ACD59691.1 | 0.145 | 33 | 0.125 | 33 | 0.159 | 30 | 0.093 | 0.11  | N | 0.57 | SignalP-noTM |
| gi_188521747_gb_ACD59692.1 | 0.109 | 12 | 0.095 | 70 | 0.118 | 11 | 0.073 | 0.085 | N | 0.57 | SignalP-noTM |
| gi_188521748_gb_ACD59693.1 | 0.186 | 38 | 0.133 | 38 | 0.151 | 11 | 0.097 | 0.116 | N | 0.57 | SignalP-noTM |
| gi_188521754_gb_ACD59699.1 | 0.201 | 46 | 0.162 | 46 | 0.311 | 2  | 0.119 | 0.142 | N | 0.57 | SignalP-noTM |
| gi_188521755_gb_ACD59700.1 | 0.105 | 48 | 0.101 | 68 | 0.126 | 47 | 0.086 | 0.094 | N | 0.57 | SignalP-noTM |
| gi_188521757_gb_ACD59702.1 | 0.132 | 34 | 0.118 | 34 | 0.195 | 1  | 0.111 | 0.114 | N | 0.57 | SignalP-noTM |
| gi_188521760_gb_ACD59705.1 | 0.346 | 48 | 0.189 | 48 | 0.194 | 45 | 0.098 | 0.146 | N | 0.57 | SignalP-noTM |
| gi_188521761_gb_ACD59706.1 | 0.51  | 21 | 0.692 | 21 | 0.97  | 20 | 0.932 | 0.805 | Y | 0.57 | SignalP-noTM |
| gi_188521762_gb_ACD59707.1 | 0.609 | 20 | 0.495 | 20 | 0.606 | 1  | 0.421 | 0.468 | N | 0.51 | SignalP-TM   |
| gi_188521767_gb_ACD59712.1 | 0.143 | 27 | 0.1   | 27 | 0.106 | 61 | 0.065 | 0.083 | N | 0.57 | SignalP-noTM |
| gi_188521769_gb_ACD59714.1 | 0.17  | 22 | 0.157 | 22 | 0.238 | 31 | 0.152 | 0.155 | N | 0.57 | SignalP-noTM |
| gi_188521770_gb_ACD59715.1 | 0.154 | 30 | 0.142 | 30 | 0.262 | 1  | 0.129 | 0.136 | N | 0.57 | SignalP-noTM |
| gi_188521771_gb_ACD59716.1 | 0.105 | 61 | 0.099 | 29 | 0.125 | 38 | 0.079 | 0.092 | N | 0.51 | SignalP-TM   |
| gi_188521778_gb_ACD59723.1 | 0.102 | 37 | 0.116 | 16 | 0.163 | 10 | 0.131 | 0.123 | N | 0.57 | SignalP-noTM |
| gi_188521780_gb_ACD59725.1 | 0.15  | 36 | 0.14  | 36 | 0.198 | 18 | 0.122 | 0.132 | N | 0.57 | SignalP-noTM |
| gi_188521781_gb_ACD59726.1 | 0.115 | 22 | 0.142 | 54 | 0.246 | 50 | 0.13  | 0.136 | N | 0.57 | SignalP-noTM |
| gi_188521782_gb_ACD59727.1 | 0.121 | 67 | 0.176 | 15 | 0.362 | 8  | 0.316 | 0.228 | N | 0.51 | SignalP-TM   |
| gi_188521786_gb_ACD59731.1 | 0.12  | 45 | 0.13  | 11 | 0.237 | 3  | 0.174 | 0.151 | N | 0.57 | SignalP-noTM |
| gi_188521789_gb_ACD59734.1 | 0.137 | 51 | 0.116 | 51 | 0.249 | 1  | 0.092 | 0.107 | N | 0.51 | SignalP-TM   |
| gi_188521790_gb_ACD59735.1 | 0.12  | 32 | 0.11  | 32 | 0.152 | 27 | 0.097 | 0.105 | N | 0.51 | SignalP-TM   |
| gi_188521792_gb_ACD59737.1 | 0.101 | 7  | 0.138 | 12 | 0.284 | 4  | 0.198 | 0.167 | N | 0.57 | SignalP-noTM |
| gi_188521794_gb_ACD59739.1 | 0.113 | 18 | 0.1   | 67 | 0.102 | 55 | 0.089 | 0.095 | N | 0.57 | SignalP-noTM |
| gi_188521795_gb_ACD59740.1 | 0.108 | 32 | 0.112 | 11 | 0.161 | 1  | 0.122 | 0.117 | N | 0.57 | SignalP-noTM |
| gi_188521796_gb_ACD59741.1 | 0.198 | 36 | 0.125 | 11 | 0.218 | 2  | 0.158 | 0.138 | N | 0.51 | SignalP-TM   |
| gi_188521797_gb_ACD59742.1 | 0.111 | 26 | 0.142 | 11 | 0.294 | 2  | 0.2   | 0.163 | N | 0.51 | SignalP-TM   |
| gi_188521798_gb_ACD59743.1 | 0.44  | 18 | 0.29  | 18 | 0.573 | 1  | 0.267 | 0.282 | N | 0.51 | SignalP-TM   |
| gi_188521799_gb_ACD59744.1 | 0.113 | 47 | 0.117 | 11 | 0.19  | 1  | 0.131 | 0.124 | N | 0.57 | SignalP-noTM |
| gi_188521800_gb_ACD59745.1 | 0.429 | 29 | 0.269 | 29 | 0.244 | 21 | 0.167 | 0.221 | N | 0.57 | SignalP-noTM |
| gi_188521801_gb_ACD59746.1 | 0.111 | 56 | 0.106 | 45 | 0.123 | 9  | 0.099 | 0.103 | N | 0.57 | SignalP-noTM |
| gi_188521804_gb_ACD59749.1 | 0.131 | 26 | 0.115 | 26 | 0.147 | 51 | 0.102 | 0.109 | N | 0.57 | SignalP-noTM |
| gi_188521811_gb_ACD59756.1 | 0.174 | 24 | 0.199 | 24 | 0.472 | 20 | 0.21  | 0.204 | N | 0.57 | SignalP-noTM |
| gi_188521812_gb_ACD59757.1 | 0.258 | 23 | 0.316 | 23 | 0.541 | 10 | 0.423 | 0.356 | N | 0.51 | SignalP-TM   |
| gi_188521813_gb_ACD59758.1 | 0.169 | 33 | 0.127 | 33 | 0.159 | 32 | 0.096 | 0.112 | N | 0.57 | SignalP-noTM |
| gi_188521815_gb_ACD59760.1 | 0.105 | 35 | 0.105 | 12 | 0.141 | 6  | 0.114 | 0.109 | N | 0.57 | SignalP-noTM |
| gi_188521816_gb_ACD59761.1 | 0.101 | 25 | 0.141 | 11 | 0.253 | 4  | 0.201 | 0.169 | N | 0.57 | SignalP-noTM |
| gi_188521817_gb_ACD59762.1 | 0.173 | 29 | 0.193 | 29 | 0.259 | 27 | 0.186 | 0.19  | N | 0.51 | SignalP-TM   |
| gi_188521818_gb_ACD59763.1 | 0.161 | 53 | 0.204 | 53 | 0.432 | 47 | 0.151 | 0.184 | N | 0.51 | SignalP-TM   |
| gi_188521819_gb_ACD59764.1 | 0.143 | 45 | 0.138 | 45 | 0.175 | 43 | 0.113 | 0.129 | N | 0.51 | SignalP-TM   |
| gi_188521822_gb_ACD59767.1 | 0.12  | 62 | 0.101 | 15 | 0.142 | 12 | 0.091 | 0.096 | N | 0.57 | SignalP-noTM |
| gi_188521824_gb_ACD59769.1 | 0.282 | 52 | 0.227 | 52 | 0.524 | 38 | 0.206 | 0.217 | N | 0.57 | SignalP-noTM |
| gi_188521827_gb_ACD59772.1 | 0.139 | 20 | 0.126 | 40 | 0.157 | 38 | 0.094 | 0.111 | N | 0.57 | SignalP-noTM |
| gi_188521828_gb_ACD59773.1 | 0.218 | 65 | 0.208 | 48 | 0.526 | 44 | 0.225 | 0.216 | N | 0.57 | SignalP-noTM |
| gi_188521829_gb_ACD59774.1 | 0.109 | 29 | 0.131 | 11 | 0.273 | 1  | 0.162 | 0.145 | N | 0.57 | SignalP-noTM |
| gi_188521835_gb_ACD59780.1 | 0.28  | 30 | 0.212 | 30 | 0.265 | 3  | 0.175 | 0.195 | N | 0.57 | SignalP-noTM |
| gi_188521836_gb_ACD59781.1 | 0.114 | 30 | 0.116 | 37 | 0.174 | 36 | 0.117 | 0.116 | N | 0.57 | SignalP-noTM |
| gi_188521837_gb_ACD59782.1 | 0.116 | 33 | 0.114 | 33 | 0.164 | 29 | 0.109 | 0.112 | N | 0.57 | SignalP-noTM |
| gi_188521838_gb_ACD59783.1 | 0.118 | 21 | 0.105 | 64 | 0.125 | 50 | 0.093 | 0.1   | N | 0.57 | SignalP-noTM |
| gi_188521840_gb_ACD59785.1 | 0.326 | 34 | 0.271 | 34 | 0.291 | 33 | 0.193 | 0.242 | N | 0.51 | SignalP-TM   |
| gi_188521841_gb_ACD59786.1 | 0.131 | 20 | 0.115 | 20 | 0.148 | 51 | 0.1   | 0.108 | N | 0.57 | SignalP-noTM |
| gi_188521842_gb_ACD59787.1 | 0.184 | 69 | 0.134 | 69 | 0.103 | 38 | 0.09  | 0.113 | N | 0.57 | SignalP-noTM |
| gi_188521843_gb_ACD59788.1 | 0.127 | 28 | 0.12  | 11 | 0.184 | 2  | 0.144 | 0.131 | N | 0.57 | SignalP-noTM |
| gi_188521846_gb_ACD59791.1 | 0.191 | 59 | 0.171 | 59 | 0.245 | 52 | 0.093 | 0.134 | N | 0.57 | SignalP-noTM |
| gi_188521847_gb_ACD59792.1 | 0.116 | 6  | 0.106 | 36 | 0.12  | 30 | 0.096 | 0.101 | N | 0.57 | SignalP-noTM |
| gi_188521848_gb_ACD59793.1 | 0.29  | 20 | 0.18  | 20 | 0.148 | 19 | 0.113 | 0.149 | N | 0.57 | SignalP-noTM |
| gi_188521849_gb_ACD59794.1 | 0.158 | 23 | 0.363 | 23 | 0.967 | 11 | 0.864 | 0.599 | Y | 0.57 | SignalP-noTM |
| gi_188521850_gb_ACD59795.1 | 0.125 | 40 | 0.105 | 65 | 0.128 | 55 | 0.085 | 0.098 | N | 0.51 | SignalP-TM   |
| gi_188521852_gb_ACD59797.1 | 0.144 | 28 | 0.19  | 11 | 0.505 | 2  | 0.369 | 0.256 | N | 0.51 | SignalP-TM   |
| gi_188521853_gb_ACD59798.1 | 0.226 | 29 | 0.193 | 29 | 0.299 | 3  | 0.196 | 0.194 | N | 0.57 | SignalP-noTM |
| gi_188521862_gb_ACD59807.1 | 0.117 | 30 | 0.118 | 53 | 0.168 | 46 | 0.112 | 0.115 | N | 0.57 | SignalP-noTM |
| gi_188521866_gb_ACD59811.1 | 0.107 | 56 | 0.106 | 11 | 0.175 | 2  | 0.108 | 0.107 | N | 0.57 | SignalP-noTM |
| gi_188521872_gb_ACD59817.1 | 0.298 | 22 | 0.372 | 22 | 0.688 | 8  | 0.528 | 0.445 | N | 0.57 | SignalP-noTM |
| gi_188521876_gb_ACD59821.1 | 0.411 | 21 | 0.358 | 21 | 0.512 | 16 | 0.275 | 0.319 | N | 0.57 | SignalP-noTM |
| gi_188521877_gb_ACD59822.1 | 0.246 | 20 | 0.225 | 20 | 0.37  | 17 | 0.177 | 0.202 | N | 0.57 | SignalP-noTM |
| gi_188521878_gb_ACD59823.1 | 0.645 | 19 | 0.696 | 19 | 0.84  | 7  | 0.77  | 0.731 | Y | 0.57 | SignalP-noTM |
| gi_188521879_gb_ACD59824.1 | 0.107 | 25 | 0.128 | 11 | 0.214 | 1  | 0.158 | 0.142 | N | 0.57 | SignalP-noTM |
| gi_188521880_gb_ACD59825.1 | 0.853 | 23 | 0.911 | 23 | 0.984 | 19 | 0.963 | 0.935 | Y | 0.57 | SignalP-noTM |
| gi_188521881_gb_ACD59826.1 | 0.236 | 40 | 0.177 | 23 | 0.297 | 12 | 0.218 | 0.192 | N | 0.51 | SignalP-TM   |
| gi_188521882_gb_ACD59827.1 | 0.13  | 38 | 0.11  | 11 | 0.148 | 5  | 0.129 | 0.117 | N | 0.51 | SignalP-TM   |
| gi_188521982_gb_ACD59927.1 | 0.136 | 20 | 0.146 | 11 | 0.375 | 9  | 0.23  | 0.185 | N | 0.57 | SignalP-noTM |
| gi_188521983_gb_ACD59928.1 | 0.132 | 14 | 0.226 | 14 | 0.625 | 10 | 0.392 | 0.304 | N | 0.57 | SignalP-noTM |
| gi_188521986_gb_ACD59931.1 | 0.116 | 62 | 0.137 | 11 | 0.301 | 24 | 0.185 | 0.159 | N | 0.57 | SignalP-noTM |
| gi_188521990_gb_ACD59935.1 | 0.214 | 27 | 0.291 | 27 | 0.496 | 25 | 0.365 | 0.326 | N | 0.57 | SignalP-noTM |
| gi_188521991_gb_ACD59936.1 | 0.867 | 32 | 0.846 | 32 | 0.92  | 29 | 0.775 | 0.812 | Y | 0.57 | SignalP-noTM |
| gi_188521992_gb_ACD59937.1 | 0.137 | 6  | 0.129 | 11 | 0.227 | 5  | 0.179 | 0.148 | N | 0.51 | SignalP-TM   |
| gi_188521993_gb_ACD59938.1 | 0.883 | 30 | 0.898 | 30 | 0.988 | 17 | 0.939 | 0.917 | Y | 0.57 | SignalP-noTM |
| gi_188521994_gb_ACD59939.1 | 0.216 | 32 | 0.348 | 32 | 0.959 | 18 | 0.771 | 0.547 | N | 0.57 | SignalP-noTM |
| gi_188521995_gb_ACD59940.1 | 0.166 | 25 | 0.138 | 25 | 0.173 | 13 | 0.113 | 0.128 | N | 0.51 | SignalP-TM   |

|          |          |          |          |                            |
|----------|----------|----------|----------|----------------------------|
| 0.101197 | 0.09984  | 0.103958 | 0.101665 | gi_188522021_gb_ACD59966.1 |
| 0.159896 | 0.925532 | 0.086669 | 0.390699 | gi_188522022_gb_ACD59967.1 |
| 0.63599  | 0.533699 | 0.770653 | 0.646781 | gi_188522026_gb_ACD59971.1 |
| 0.162737 | 0.199089 | 0.116603 | 0.159476 | gi_188522028_gb_ACD59973.1 |
| 0.180199 | 0.045564 | 0.224088 | 0.14995  | gi_188522029_gb_ACD59974.1 |
| 0.085959 | 0.087864 | 0.174078 | 0.115967 | gi_188522030_gb_ACD59975.1 |
| 0.161109 | 0.598447 | 0.120999 | 0.293518 | gi_188522031_gb_ACD59976.1 |
| 0.32213  | 0.07806  | 0.280496 | 0.226895 | gi_188522032_gb_ACD59977.1 |
| 0.163557 | 0.154335 | 0.188314 | 0.168735 | gi_188522033_gb_ACD59978.1 |
| 0.153553 | 0.324098 | 0.265612 | 0.247754 | gi_188522034_gb_ACD59979.1 |
| 0.162737 | 0.091289 | 0.181087 | 0.145038 | gi_188522035_gb_ACD59980.1 |
| 0.095349 | 0.059023 | 0.111155 | 0.088509 | gi_188522036_gb_ACD59981.1 |
| 0.135404 | 0.1065   | 0.20538  | 0.149095 | gi_188522037_gb_ACD59982.1 |
| 0.094319 | 0.053454 | 0.190156 | 0.112643 | gi_188522038_gb_ACD59983.1 |
| 0.103123 | 0.510498 | 0.164379 | 0.259333 | gi_188522039_gb_ACD59984.1 |
| 0.121319 | 0.077845 | 0.116603 | 0.105256 | gi_188522041_gb_ACD59986.1 |
| 0.135053 | 0.045695 | 0.204403 | 0.128384 | gi_188522042_gb_ACD59987.1 |
| 0.120881 | 0.160704 | 0.127862 | 0.136416 | gi_188522043_gb_ACD59988.1 |
| 0.127862 | 0.071625 | 0.076775 | 0.092087 | gi_188522044_gb_ACD59989.1 |
| 0.262697 | 0.211818 | 0.361929 | 0.278815 | gi_188522045_gb_ACD59990.1 |
| 0.08883  | 0.059189 | 0.096129 | 0.081383 | gi_188522046_gb_ACD59991.1 |
| 0.1065   | 0.109389 | 0.095609 | 0.103833 | gi_188522047_gb_ACD59992.1 |
| 0.342089 | 0.917511 | 0.32213  | 0.527243 | gi_188522048_gb_ACD59993.1 |
| 0.734388 | 0.732629 | 0.846836 | 0.771284 | gi_188522049_gb_ACD59994.1 |
| 0.069267 | 0.128869 | 0.07385  | 0.090662 | gi_188522050_gb_ACD59995.1 |
| 0.077629 | 0.047021 | 0.104238 | 0.076296 | gi_188522051_gb_ACD59996.1 |
| 0.153164 | 0.139314 | 0.21738  | 0.169953 | gi_188522053_gb_ACD59998.1 |
| 0.075718 | 0.02271  | 0.163967 | 0.087465 | gi_188522057_gb_ACD60002.1 |
| 0.080247 | 0.046089 | 0.099302 | 0.075213 | gi_188522059_gb_ACD60004.1 |
| 0.06985  | 0.00377  | 0.082489 | 0.052036 | gi_188522060_gb_ACD60005.1 |
| 0.934134 | 0.839296 | 0.871804 | 0.881745 | gi_188522062_gb_ACD60007.1 |
| 0.061226 | 0.017793 | 0.079365 | 0.052795 | gi_188                     |

|                            |       |    |       |    |       |    |       |       |   |      |              |
|----------------------------|-------|----|-------|----|-------|----|-------|-------|---|------|--------------|
| gj_188521996_gb_ACD59941.1 | 0.158 | 27 | 0.144 | 27 | 0.262 | 1  | 0.14  | 0.142 | N | 0.57 | SignalP-noTM |
| gj_188521997_gb_ACD59942.1 | 0.398 | 23 | 0.303 | 23 | 0.502 | 1  | 0.288 | 0.296 | N | 0.57 | SignalP-noTM |
| gj_188521998_gb_ACD59943.1 | 0.138 | 26 | 0.247 | 22 | 0.621 | 20 | 0.408 | 0.322 | N | 0.57 | SignalP-noTM |
| gj_188521999_gb_ACD59944.1 | 0.251 | 26 | 0.17  | 20 | 0.335 | 10 | 0.231 | 0.199 | N | 0.57 | SignalP-noTM |
| gj_188522000_gb_ACD59945.1 | 0.251 | 30 | 0.284 | 30 | 0.511 | 24 | 0.233 | 0.265 | N | 0.51 | SignalP-TM   |
| gj_188522001_gb_ACD59946.1 | 0.112 | 26 | 0.149 | 11 | 0.265 | 1  | 0.219 | 0.182 | N | 0.57 | SignalP-noTM |
| gj_188522004_gb_ACD59949.1 | 0.101 | 49 | 0.125 | 49 | 0.185 | 19 | 0.133 | 0.129 | N | 0.57 | SignalP-noTM |
| gj_188522009_gb_ACD59954.1 | 0.103 | 20 | 0.176 | 11 | 0.432 | 2  | 0.308 | 0.238 | N | 0.57 | SignalP-noTM |
| gj_188522010_gb_ACD59955.1 | 0.141 | 24 | 0.121 | 24 | 0.156 | 8  | 0.115 | 0.118 | N | 0.57 | SignalP-noTM |
| gj_188522016_gb_ACD59961.1 | 0.104 | 38 | 0.121 | 52 | 0.184 | 40 | 0.094 | 0.108 | N | 0.57 | SignalP-noTM |
| gj_188522018_gb_ACD59963.1 | 0.426 | 47 | 0.348 | 47 | 0.374 | 44 | 0.17  | 0.282 | N | 0.51 | SignalP-TM   |
| gj_188522019_gb_ACD59964.1 | 0.138 | 36 | 0.112 | 20 | 0.159 | 11 | 0.101 | 0.106 | N | 0.57 | SignalP-noTM |
| gj_188522021_gb_ACD59966.1 | 0.13  | 26 | 0.148 | 11 | 0.334 | 3  | 0.229 | 0.186 | N | 0.57 | SignalP-noTM |
| gj_188522022_gb_ACD59967.1 | 0.16  | 60 | 0.124 | 60 | 0.238 | 1  | 0.107 | 0.116 | N | 0.57 | SignalP-noTM |
| gj_188522026_gb_ACD59971.1 | 0.109 | 34 | 0.123 | 11 | 0.228 | 1  | 0.145 | 0.133 | N | 0.57 | SignalP-noTM |
| gj_188522028_gb_ACD59973.1 | 0.11  | 24 | 0.132 | 12 | 0.244 | 3  | 0.168 | 0.149 | N | 0.57 | SignalP-noTM |
| gj_188522029_gb_ACD59974.1 | 0.121 | 38 | 0.111 | 38 | 0.118 | 31 | 0.092 | 0.102 | N | 0.57 | SignalP-noTM |
| gj_188522030_gb_ACD59975.1 | 0.195 | 58 | 0.222 | 58 | 0.433 | 50 | 0.17  | 0.197 | N | 0.57 | SignalP-noTM |
| gj_188522031_gb_ACD59976.1 | 0.569 | 41 | 0.329 | 41 | 0.331 | 32 | 0.143 | 0.242 | N | 0.57 | SignalP-noTM |
| gj_188522032_gb_ACD59977.1 | 0.216 | 27 | 0.148 | 27 | 0.144 | 26 | 0.088 | 0.12  | N | 0.57 | SignalP-noTM |
| gj_188522033_gb_ACD59978.1 | 0.159 | 31 | 0.16  | 31 | 0.234 | 21 | 0.14  | 0.15  | N | 0.57 | SignalP-noTM |
| gj_188522034_gb_ACD59979.1 | 0.125 | 20 | 0.143 | 11 | 0.287 | 3  | 0.222 | 0.173 | N | 0.51 | SignalP-TM   |
| gj_188522035_gb_ACD59980.1 | 0.125 | 32 | 0.179 | 13 | 0.407 | 10 | 0.288 | 0.23  | N | 0.57 | SignalP-noTM |
| gj_188522036_gb_ACD59981.1 | 0.119 | 34 | 0.12  | 11 | 0.208 | 1  | 0.14  | 0.129 | N | 0.57 | SignalP-noTM |
| gj_188522037_gb_ACD59982.1 | 0.155 | 33 | 0.138 | 33 | 0.203 | 1  | 0.145 | 0.14  | N | 0.51 | SignalP-TM   |
| gj_188522038_gb_ACD59983.1 | 0.164 | 27 | 0.207 | 11 | 0.574 | 1  | 0.418 | 0.285 | N | 0.51 | SignalP-TM   |
| gj_188522039_gb_ACD59984.1 | 0.199 | 38 | 0.118 | 14 | 0.197 | 6  | 0.142 | 0.127 | N | 0.51 | SignalP-TM   |
| gj_188522041_gb_ACD59986.1 | 0.166 | 26 | 0.139 | 26 | 0.187 | 24 | 0.123 | 0.133 | N | 0.51 | SignalP-TM   |
| gj_188522042_gb_ACD59987.1 | 0.15  | 44 | 0.099 | 70 | 0.115 | 5  | 0.06  | 0.085 | N | 0.51 | SignalP-TM   |
| gj_188522043_gb_ACD59988.1 | 0.382 | 25 | 0.591 | 25 | 0.95  | 23 | 0.909 | 0.74  | Y | 0.57 | SignalP-noTM |
| gj_188522044_gb_ACD59989.1 | 0.101 | 22 | 0.113 | 54 | 0.145 | 50 | 0.107 | 0.11  | N | 0.57 | SignalP-noTM |
| gj_188522045_gb_ACD59990.1 | 0.101 | 3  | 0.103 | 65 | 0.119 | 42 | 0.094 | 0.099 | N | 0.57 | SignalP-noTM |
| gj_188522046_gb_ACD59991.1 | 0.113 | 23 | 0.117 | 13 | 0.161 | 10 | 0.14  | 0.127 | N | 0.57 | SignalP-noTM |
| gj_188522047_gb_ACD59992.1 | 0.197 | 41 | 0.141 | 41 | 0.17  | 39 | 0.085 | 0.115 | N | 0.57 | SignalP-noTM |
| gj_188522048_gb_ACD59993.1 | 0.11  | 47 | 0.185 | 11 | 0.456 | 4  | 0.352 | 0.263 | N | 0.57 | SignalP-noTM |
| gj_188522049_gb_ACD59994.1 | 0.101 | 53 | 0.148 | 11 | 0.332 | 2  | 0.22  | 0.182 | N | 0.57 | SignalP-noTM |
| gj_188522050_gb_ACD59995.1 | 0.123 | 25 | 0.105 | 41 | 0.112 | 52 | 0.09  | 0.098 | N | 0.57 | SignalP-noTM |
| gj_188522051_gb_ACD59996.1 | 0.119 | 50 | 0.136 | 11 | 0.299 | 3  | 0.197 | 0.165 | N | 0.57 | SignalP-noTM |
| gj_188522053_gb_ACD59998.1 | 0.252 | 56 | 0.167 | 56 | 0.201 | 2  | 0.119 | 0.144 | N | 0.57 | SignalP-noTM |
| gj_188522057_gb_ACD60002.1 | 0.111 | 27 | 0.121 | 11 | 0.196 | 5  | 0.158 | 0.134 | N | 0.51 | SignalP-TM   |
| gj_188522059_gb_ACD60004.1 | 0.125 | 15 | 0.123 | 51 | 0.168 | 47 | 0.102 | 0.113 | N | 0.57 | SignalP-noTM |
| gj_188522060_gb_ACD60005.1 | 0.132 | 26 | 0.225 | 19 | 0.48  | 2  | 0.423 | 0.298 | N | 0.51 | SignalP-TM   |
| gj_188522062_gb_ACD60007.1 | 0.119 | 18 | 0.106 | 18 | 0.12  | 8  | 0.098 | 0.102 | N | 0.57 | SignalP-noTM |
| gj_188522063_gb_ACD60008.1 | 0.186 | 22 | 0.178 | 22 | 0.372 | 1  | 0.218 | 0.193 | N | 0.51 | SignalP-TM   |
| gj_188522064_gb_ACD60009.1 | 0.102 | 50 | 0.116 | 16 | 0.178 | 8  | 0.128 | 0.121 | N | 0.57 | SignalP-noTM |
| gj_188522065_gb_ACD60010.1 | 0.122 | 31 | 0.16  | 26 | 0.289 | 3  | 0.201 | 0.179 | N | 0.57 | SignalP-noTM |
| gj_188522066_gb_ACD60011.1 | 0.215 | 29 | 0.178 | 29 | 0.33  | 28 | 0.138 | 0.159 | N | 0.57 | SignalP-noTM |
| gj_188522069_gb_ACD60014.1 | 0.234 | 33 | 0.162 | 33 | 0.325 | 18 | 0.167 | 0.164 | N | 0.57 | SignalP-noTM |
| gj_188522070_gb_ACD60015.1 | 0.121 | 35 | 0.161 | 14 | 0.296 | 6  | 0.246 | 0.201 | N | 0.57 | SignalP-noTM |
| gj_188522071_gb_ACD60016.1 | 0.119 | 23 | 0.107 | 23 | 0.128 | 21 | 0.09  | 0.099 | N | 0.57 | SignalP-noTM |
| gj_188522097_gb_ACD60042.1 | 0.114 | 32 | 0.131 | 11 | 0.252 | 1  | 0.157 | 0.143 | N | 0.57 | SignalP-noTM |
| gj_188522098_gb_ACD60043.1 | 0.164 | 37 | 0.231 | 17 | 0.681 | 16 | 0.418 | 0.319 | N | 0.57 | SignalP-noTM |
| gj_188522111_gb_ACD60056.1 | 0.478 | 20 | 0.366 | 20 | 0.451 | 1  | 0.301 | 0.342 | N | 0.51 | SignalP-TM   |
| gj_188522112_gb_ACD60057.1 | 0.142 | 30 | 0.188 | 11 | 0.533 | 1  | 0.335 | 0.243 | N | 0.51 | SignalP-TM   |
| gj_188522113_gb_ACD60058.1 | 0.184 | 17 | 0.29  | 17 | 0.546 | 13 | 0.462 | 0.354 | N | 0.51 | SignalP-TM   |
| gj_188522114_gb_ACD60059.1 | 0.374 | 54 | 0.197 | 54 | 0.266 | 1  | 0.112 | 0.166 | N | 0.51 | SignalP-TM   |
| gj_188522115_gb_ACD60060.1 | 0.17  | 22 | 0.255 | 22 | 0.52  | 1  | 0.38  | 0.301 | N | 0.51 | SignalP-TM   |
| gj_188522116_gb_ACD60061.1 | 0.216 | 20 | 0.269 | 20 | 0.418 | 1  | 0.309 | 0.284 | N | 0.51 | SignalP-TM   |
| gj_188522117_gb_ACD60062.1 | 0.194 | 67 | 0.141 | 67 | 0.138 | 1  | 0.097 | 0.12  | N | 0.57 | SignalP-noTM |
| gj_188522118_gb_ACD60063.1 | 0.8   | 20 | 0.87  | 20 | 0.983 | 10 | 0.94  | 0.903 | Y | 0.57 | SignalP-noTM |
| gj_188522119_gb_ACD60064.1 | 0.119 | 25 | 0.122 | 11 | 0.263 | 1  | 0.138 | 0.128 | N | 0.51 | SignalP-TM   |
| gj_188522120_gb_ACD60065.1 | 0.283 | 20 | 0.433 | 20 | 0.797 | 8  | 0.638 | 0.55  | N | 0.57 | SignalP-noTM |
| gj_188522121_gb_ACD60066.1 | 0.129 | 39 | 0.133 | 39 | 0.183 | 40 | 0.114 | 0.124 | N | 0.57 | SignalP-noTM |
| gj_188522123_gb_ACD60068.1 | 0.27  | 39 | 0.238 | 39 | 0.422 | 27 | 0.241 | 0.239 | N | 0.51 | SignalP-TM   |
| gj_188522124_gb_ACD60069.1 | 0.135 | 27 | 0.126 | 27 | 0.282 | 1  | 0.121 | 0.124 | N | 0.57 | SignalP-noTM |
| gj_188522128_gb_ACD60073.1 | 0.121 | 29 | 0.129 | 12 | 0.28  | 2  | 0.166 | 0.146 | N | 0.57 | SignalP-noTM |
| gj_188522129_gb_ACD60074.1 | 0.112 | 45 | 0.111 | 45 | 0.135 | 47 | 0.096 | 0.104 | N | 0.57 | SignalP-noTM |
| gj_188522130_gb_ACD60075.1 | 0.167 | 22 | 0.139 | 22 | 0.181 | 2  | 0.124 | 0.132 | N | 0.57 | SignalP-noTM |
| gj_188522131_gb_ACD60076.1 | 0.194 | 36 | 0.13  | 36 | 0.138 | 2  | 0.091 | 0.112 | N | 0.57 | SignalP-noTM |
| gj_188522132_gb_ACD60077.1 | 0.136 | 29 | 0.138 | 29 | 0.206 | 25 | 0.152 | 0.144 | N | 0.57 | SignalP-noTM |
| gj_188522133_gb_ACD60078.1 | 0.134 | 27 | 0.108 | 27 | 0.122 | 56 | 0.082 | 0.096 | N | 0.57 | SignalP-noTM |
| gj_188522134_gb_ACD60079.1 | 0.141 | 27 | 0.12  | 27 | 0.126 | 37 | 0.094 | 0.108 | N | 0.57 | SignalP-noTM |
| gj_188522135_gb_ACD60080.1 | 0.161 | 31 | 0.157 | 11 | 0.368 | 1  | 0.239 | 0.187 | N | 0.51 | SignalP-TM   |
| gj_188522136_gb_ACD60081.1 | 0.185 | 42 | 0.211 | 42 | 0.356 | 40 | 0.225 | 0.216 | N | 0.51 | SignalP-TM   |
| gj_188522137_gb_ACD60082.1 | 0.177 | 25 | 0.147 | 11 | 0.268 | 1  | 0.218 | 0.173 | N | 0.51 | SignalP-TM   |
| gj_188522138_gb_ACD60083.1 | 0.12  | 18 | 0.127 | 11 | 0.252 | 2  | 0.153 | 0.137 | N | 0.51 | SignalP-TM   |
| gj_188522139_gb_ACD60084.1 | 0.246 | 33 | 0.222 | 17 | 0.386 | 13 | 0.303 | 0.252 | N | 0.51 | SignalP-TM   |
| gj_188522140_gb_ACD60085.1 | 0.107 | 26 | 0.155 | 11 | 0.366 | 1  | 0.233 | 0.184 | N | 0.51 | SignalP-TM   |

|          |          |          |          |                            |
|----------|----------|----------|----------|----------------------------|
| 0.633207 | 0.027385 | 0.622694 | 0.427762 | gj_188522157_gb_ACD60102.1 |
| 0.125209 | 0.073441 | 0.140035 | 0.112895 | gj_188522158_gb_ACD60103.1 |
| 0.937556 | 0.750447 | 0.890319 | 0.859441 | gj_188522159_gb_ACD60104.1 |
| 0.129882 | 0.231475 | 0.152775 | 0.171377 | gj_188522160_gb_ACD60105.1 |
| 0.130222 | 0.012297 | 0.137881 | 0.093467 | gj_188522162_gb_ACD60107.1 |
| 0.084556 | 0.017124 | 0.121319 | 0.074333 | gj_188522163_gb_ACD60108.1 |
| 0.138596 | 0.076775 | 0.172787 | 0.129386 | gj_188522164_gb_ACD60109.1 |
| 0.14517  | 0.092038 | 0.178873 | 0.138694 | gj_188522165_gb_ACD60110.1 |
| 0.095091 | 0.002097 | 0.125209 | 0.074132 | gj_188522166_gb_ACD60111.1 |
| 0.183772 | 0.23308  | 0.255213 | 0.224022 | gj_188522168_gb_ACD60113.1 |
| 0.132274 | 0.066608 | 0.138238 | 0.112373 | gj_188522169_gb_ACD60114.1 |
| 0.236313 | 0.916138 | 0.311739 | 0.488063 | gj_188522170_gb_ACD60115.1 |
| 0.188314 | 0.037579 | 0.281709 | 0.169201 | gj_188522171_gb_ACD60116.1 |
| 0.777992 | 0.842905 | 0.798026 | 0.806308 | gj_188522172_gb_ACD60117.1 |
| 0.535192 | 0.162737 | 0.521736 | 0.406555 | gj_188522174_gb_ACD60119.1 |
| 0.109097 | 0.02186  | 0.153164 | 0.094707 | gj_188522175_gb_ACD60120.1 |
| 0.192476 | 0.027626 | 0.268548 | 0.162883 | gj_188522176_gb_ACD60121.1 |
| 0.05836  | 0.004802 | 0.084788 | 0.049317 | gj_188522177_gb_ACD60122.1 |
| 0.816678 | 0.506    | 0.833966 | 0.718881 | gj_188522180_gb_ACD60125.1 |
| 0.229878 | 0.381544 | 0.093299 | 0.234907 | gj_188522183_gb_ACD60128.1 |
| 0.180643 | 0.301535 | 0.078493 | 0.18689  | gj_188522184_gb_ACD60129.1 |
| 0.063328 | 0.035468 | 0.102018 | 0.066938 | gj_188522186_gb_ACD60131.1 |
| 0.218915 | 0.115373 | 0.262697 | 0.198995 | gj_188522191_gb_ACD60136.1 |
| 0.095609 | 0.002451 | 0.145916 | 0.081325 | gj_188522192_gb_ACD60137.1 |
| 0.157095 | 0.085021 | 0.123901 | 0.122006 | gj_188522193_gb_ACD60138.1 |
| 0.22461  | 0.571506 | 0.24122  | 0.345779 | gj_188522195_gb_ACD60140.1 |
| 0.681788 | 0.984141 | 0.852959 | 0.839629 | gj_188522196_gb_ACD60141.1 |
| 0.041567 | 0.182873 | 0.125868 | 0.116769 | gj_188522197_gb_ACD60142.1 |
| 0.203915 | 0.207839 | 0.1603   | 0.190685 | gj_188522198_gb_ACD60143.1 |
| 0.172787 | 0.508249 | 0.116294 | 0.265777 | gj_188522199_gb_ACD60144.1 |
| 0.305339 | 0.080691 | 0.287819 | 0.224616 | gj_188522200_gb_ACD60145.1 |
| 0.186032 | 0.567829 | 0.152775 | 0.302212 | gj_188522201_gb_ACD60146.1 |
|          |          |          |          |                            |

|                            |       |    |       |    |       |    |       |       |   |      |              |
|----------------------------|-------|----|-------|----|-------|----|-------|-------|---|------|--------------|
| gj_188522141_gb_ACD60086_1 | 0.105 | 44 | 0.088 | 70 | 0.095 | 61 | 0.054 | 0.075 | N | 0.51 | SignalP-TM   |
| gj_188522142_gb_ACD60087_1 | 0.151 | 31 | 0.12  | 31 | 0.173 | 30 | 0.084 | 0.103 | N | 0.57 | SignalP-noTM |
| gj_188522143_gb_ACD60088_1 | 0.114 | 57 | 0.106 | 44 | 0.123 | 32 | 0.084 | 0.095 | N | 0.57 | SignalP-noTM |
| gj_188522144_gb_ACD60089_1 | 0.105 | 28 | 0.098 | 69 | 0.103 | 62 | 0.082 | 0.091 | N | 0.57 | SignalP-noTM |
| gj_188522145_gb_ACD60090_1 | 0.137 | 55 | 0.115 | 55 | 0.109 | 27 | 0.086 | 0.102 | N | 0.57 | SignalP-noTM |
| gj_188522146_gb_ACD60091_1 | 0.149 | 20 | 0.138 | 37 | 0.24  | 6  | 0.135 | 0.137 | N | 0.57 | SignalP-noTM |
| gj_188522147_gb_ACD60092_1 | 0.114 | 63 | 0.112 | 53 | 0.162 | 47 | 0.11  | 0.111 | N | 0.57 | SignalP-noTM |
| gj_188522148_gb_ACD60093_1 | 0.113 | 31 | 0.117 | 37 | 0.212 | 28 | 0.089 | 0.107 | N | 0.51 | SignalP-TM   |
| gj_188522149_gb_ACD60094_1 | 0.393 | 30 | 0.446 | 30 | 0.648 | 23 | 0.324 | 0.401 | N | 0.51 | SignalP-TM   |
| gj_188522150_gb_ACD60095_1 | 0.48  | 20 | 0.45  | 20 | 0.472 | 15 | 0.404 | 0.428 | N | 0.57 | SignalP-noTM |
| gj_188522152_gb_ACD60097_1 | 0.121 | 40 | 0.113 | 12 | 0.207 | 7  | 0.126 | 0.119 | N | 0.57 | SignalP-noTM |
| gj_188522153_gb_ACD60098_1 | 0.123 | 27 | 0.13  | 27 | 0.236 | 22 | 0.141 | 0.135 | N | 0.57 | SignalP-noTM |
| gj_188522157_gb_ACD60102_1 | 0.594 | 24 | 0.579 | 24 | 0.734 | 15 | 0.595 | 0.585 | Y | 0.51 | SignalP-TM   |
| gj_188522158_gb_ACD60103_1 | 0.239 | 26 | 0.353 | 26 | 0.724 | 19 | 0.52  | 0.415 | N | 0.51 | SignalP-TM   |
| gj_188522159_gb_ACD60104_1 | 0.217 | 27 | 0.446 | 17 | 0.991 | 9  | 0.953 | 0.684 | Y | 0.57 | SignalP-noTM |
| gj_188522160_gb_ACD60105_1 | 0.171 | 45 | 0.112 | 45 | 0.144 | 2  | 0.082 | 0.098 | N | 0.57 | SignalP-noTM |
| gj_188522162_gb_ACD60107_1 | 0.113 | 35 | 0.126 | 14 | 0.2   | 5  | 0.16  | 0.142 | N | 0.57 | SignalP-noTM |
| gj_188522163_gb_ACD60108_1 | 0.112 | 22 | 0.121 | 22 | 0.179 | 12 | 0.125 | 0.122 | N | 0.57 | SignalP-noTM |
| gj_188522164_gb_ACD60109_1 | 0.134 | 33 | 0.154 | 15 | 0.349 | 10 | 0.231 | 0.19  | N | 0.57 | SignalP-noTM |
| gj_188522165_gb_ACD60110_1 | 0.312 | 35 | 0.165 | 35 | 0.124 | 62 | 0.083 | 0.134 | N | 0.51 | SignalP-TM   |
| gj_188522166_gb_ACD60111_1 | 0.125 | 46 | 0.121 | 46 | 0.156 | 37 | 0.089 | 0.106 | N | 0.57 | SignalP-noTM |
| gj_188522168_gb_ACD60113_1 | 0.122 | 19 | 0.207 | 11 | 0.576 | 1  | 0.418 | 0.306 | N | 0.57 | SignalP-noTM |
| gj_188522169_gb_ACD60114_1 | 0.17  | 43 | 0.127 | 43 | 0.115 | 40 | 0.088 | 0.109 | N | 0.57 | SignalP-noTM |
| gj_188522170_gb_ACD60115_1 | 0.134 | 54 | 0.113 | 54 | 0.122 | 36 | 0.095 | 0.104 | N | 0.57 | SignalP-noTM |
| gj_188522171_gb_ACD60116_1 | 0.112 | 50 | 0.104 | 50 | 0.106 | 50 | 0.08  | 0.093 | N | 0.57 | SignalP-noTM |
| gj_188522172_gb_ACD60117_1 | 0.539 | 30 | 0.401 | 30 | 0.605 | 11 | 0.372 | 0.39  | N | 0.51 | SignalP-TM   |
| gj_188522174_gb_ACD60119_1 | 0.149 | 49 | 0.167 | 11 | 0.373 | 1  | 0.271 | 0.216 | N | 0.57 | SignalP-noTM |
| gj_188522175_gb_ACD60120_1 | 0.115 | 64 | 0.12  | 45 | 0.198 | 1  | 0.106 | 0.113 | N | 0.57 | SignalP-noTM |
| gj_188522176_gb_ACD60121_1 | 0.138 | 25 | 0.121 | 11 | 0.208 | 1  | 0.145 | 0.132 | N | 0.57 | SignalP-noTM |
| gj_188522177_gb_ACD60122_1 | 0.148 | 26 | 0.132 | 38 | 0.216 | 33 | 0.105 | 0.119 | N | 0.57 | SignalP-noTM |
| gj_188522180_gb_ACD60125_1 | 0.172 | 14 | 0.208 | 14 | 0.493 | 10 | 0.251 | 0.228 | N | 0.57 | SignalP-noTM |
| gj_188522183_gb_ACD60128_1 | 0.175 | 33 | 0.148 | 33 | 0.218 | 32 | 0.113 | 0.132 | N | 0.57 | SignalP-noTM |
| gj_188522184_gb_ACD60129_1 | 0.175 | 33 | 0.147 | 33 | 0.215 | 32 | 0.11  | 0.13  | N | 0.57 | SignalP-noTM |
| gj_188522186_gb_ACD60131_1 | 0.117 | 24 | 0.171 | 11 | 0.397 | 1  | 0.287 | 0.225 | N | 0.57 | SignalP-noTM |
| gj_188522191_gb_ACD60136_1 | 0.108 | 46 | 0.111 | 11 | 0.16  | 2  | 0.126 | 0.118 | N | 0.57 | SignalP-noTM |
| gj_188522192_gb_ACD60137_1 | 0.12  | 32 | 0.159 | 11 | 0.402 | 2  | 0.263 | 0.208 | N | 0.57 | SignalP-noTM |
| gj_188522193_gb_ACD60138_1 | 0.112 | 27 | 0.128 | 11 | 0.273 | 1  | 0.151 | 0.139 | N | 0.57 | SignalP-noTM |
| gj_188522195_gb_ACD60140_1 | 0.142 | 31 | 0.161 | 25 | 0.269 | 4  | 0.2   | 0.176 | N | 0.51 | SignalP-TM   |
| gj_188522196_gb_ACD60141_1 | 0.136 | 20 | 0.15  | 11 | 0.295 | 3  | 0.22  | 0.183 | N | 0.57 | SignalP-noTM |
| gj_188522197_gb_ACD60142_1 | 0.127 | 28 | 0.101 | 28 | 0.113 | 25 | 0.082 | 0.092 | N | 0.57 | SignalP-noTM |
| gj_188522198_gb_ACD60143_1 | 0.223 | 26 | 0.185 | 26 | 0.33  | 43 | 0.153 | 0.17  | N | 0.57 | SignalP-noTM |
| gj_188522199_gb_ACD60144_1 | 0.133 | 48 | 0.117 | 48 | 0.158 | 44 | 0.091 | 0.105 | N | 0.57 | SignalP-noTM |
| gj_188522200_gb_ACD60145_1 | 0.111 | 38 | 0.1   | 70 | 0.112 | 18 | 0.089 | 0.095 | N | 0.57 | SignalP-noTM |
| gj_188522201_gb_ACD60146_1 | 0.151 | 57 | 0.185 | 28 | 0.306 | 21 | 0.211 | 0.195 | N | 0.51 | SignalP-TM   |
| gj_188522202_gb_ACD60147_1 | 0.199 | 35 | 0.186 | 35 | 0.256 | 30 | 0.126 | 0.164 | N | 0.51 | SignalP-TM   |
| gj_188522203_gb_ACD60148_1 | 0.134 | 48 | 0.107 | 48 | 0.123 | 13 | 0.097 | 0.102 | N | 0.57 | SignalP-noTM |
| gj_188522207_gb_ACD60152_1 | 0.14  | 43 | 0.122 | 43 | 0.194 | 40 | 0.095 | 0.109 | N | 0.57 | SignalP-noTM |
| gj_188522208_gb_ACD60153_1 | 0.141 | 24 | 0.13  | 38 | 0.3   | 37 | 0.115 | 0.123 | N | 0.57 | SignalP-noTM |
| gj_188522209_gb_ACD60154_1 | 0.12  | 26 | 0.109 | 49 | 0.129 | 37 | 0.099 | 0.104 | N | 0.57 | SignalP-noTM |
| gj_188522210_gb_ACD60155_1 | 0.154 | 24 | 0.211 | 24 | 0.432 | 27 | 0.239 | 0.222 | N | 0.51 | SignalP-TM   |
| gj_188522217_gb_ACD60162_1 | 0.161 | 10 | 0.117 | 61 | 0.153 | 50 | 0.093 | 0.108 | N | 0.51 | SignalP-TM   |
| gj_188522218_gb_ACD60163_1 | 0.186 | 19 | 0.155 | 40 | 0.334 | 35 | 0.116 | 0.14  | N | 0.51 | SignalP-TM   |
| gj_188522219_gb_ACD60164_1 | 0.106 | 41 | 0.111 | 61 | 0.144 | 34 | 0.095 | 0.103 | N | 0.57 | SignalP-noTM |
| gj_188522221_gb_ACD60166_1 | 0.107 | 11 | 0.149 | 11 | 0.337 | 1  | 0.182 | 0.165 | N | 0.57 | SignalP-noTM |
| gj_188522222_gb_ACD60167_1 | 0.185 | 22 | 0.143 | 22 | 0.204 | 2  | 0.119 | 0.132 | N | 0.57 | SignalP-noTM |
| gj_188522224_gb_ACD60169_1 | 0.206 | 34 | 0.34  | 34 | 0.674 | 19 | 0.498 | 0.398 | N | 0.51 | SignalP-TM   |
| gj_188522225_gb_ACD60170_1 | 0.111 | 56 | 0.113 | 11 | 0.159 | 3  | 0.13  | 0.121 | N | 0.57 | SignalP-noTM |
| gj_188522226_gb_ACD60171_1 | 0.122 | 42 | 0.117 | 42 | 0.245 | 41 | 0.084 | 0.101 | N | 0.57 | SignalP-noTM |
| gj_188522231_gb_ACD60176_1 | 0.109 | 20 | 0.12  | 11 | 0.172 | 4  | 0.14  | 0.129 | N | 0.57 | SignalP-noTM |
| gj_188522233_gb_ACD60178_1 | 0.106 | 28 | 0.107 | 28 | 0.139 | 25 | 0.106 | 0.106 | N | 0.57 | SignalP-noTM |
| gj_188522234_gb_ACD60179_1 | 0.119 | 47 | 0.122 | 47 | 0.165 | 42 | 0.096 | 0.11  | N | 0.57 | SignalP-noTM |
| gj_188522235_gb_ACD60180_1 | 0.131 | 20 | 0.102 | 39 | 0.143 | 28 | 0.09  | 0.096 | N | 0.57 | SignalP-noTM |
| gj_188522236_gb_ACD60181_1 | 0.115 | 24 | 0.103 | 34 | 0.116 | 61 | 0.092 | 0.098 | N | 0.57 | SignalP-noTM |
| gj_188522237_gb_ACD60182_1 | 0.153 | 45 | 0.135 | 36 | 0.199 | 18 | 0.125 | 0.13  | N | 0.57 | SignalP-noTM |
| gj_188522238_gb_ACD60183_1 | 0.107 | 54 | 0.108 | 54 | 0.132 | 51 | 0.102 | 0.105 | N | 0.57 | SignalP-noTM |
| gj_188522239_gb_ACD60184_1 | 0.254 | 37 | 0.216 | 37 | 0.252 | 9  | 0.181 | 0.203 | N | 0.51 | SignalP-TM   |
| gj_188522242_gb_ACD60187_1 | 0.156 | 42 | 0.146 | 42 | 0.219 | 19 | 0.143 | 0.145 | N | 0.57 | SignalP-noTM |
| gj_188522245_gb_ACD60190_1 | 0.139 | 26 | 0.193 | 26 | 0.35  | 22 | 0.245 | 0.217 | N | 0.57 | SignalP-noTM |
| gj_188522248_gb_ACD60193_1 | 0.133 | 26 | 0.159 | 11 | 0.357 | 1  | 0.247 | 0.191 | N | 0.51 | SignalP-TM   |
| gj_528897488_gb_ACD60195_2 | 0.115 | 22 | 0.145 | 13 | 0.273 | 9  | 0.21  | 0.175 | N | 0.57 | SignalP-noTM |
| gj_188522252_gb_ACD60197_1 | 0.121 | 36 | 0.128 | 20 | 0.204 | 19 | 0.138 | 0.133 | N | 0.57 | SignalP-noTM |
| gj_188522263_gb_ACD60208_1 | 0.12  | 20 | 0.107 | 20 | 0.155 | 43 | 0.093 | 0.101 | N | 0.57 | SignalP-noTM |
| gj_188522264_gb_ACD60209_1 | 0.12  | 23 | 0.104 | 60 | 0.115 | 11 | 0.09  | 0.097 | N | 0.57 | SignalP-noTM |
| gj_188522265_gb_ACD60210_1 | 0.105 | 42 | 0.107 | 20 | 0.141 | 19 | 0.113 | 0.11  | N | 0.57 | SignalP-noTM |
| gj_188522267_gb_ACD60212_1 | 0.106 | 25 | 0.103 | 11 | 0.141 | 2  | 0.104 | 0.103 | N | 0.57 | SignalP-noTM |
| gj_188522271_gb_ACD60216_1 | 0.359 | 15 | 0.504 | 15 | 0.798 | 13 | 0.711 | 0.601 | Y | 0.57 | SignalP-noTM |
| gj_188522276_gb_ACD60221_1 | 0.112 | 26 | 0.128 | 11 | 0.268 | 1  | 0.142 | 0.135 | N | 0.57 | SignalP-noTM |
| gj_188522284_gb_ACD60229_1 | 0.124 | 20 | 0.132 | 25 | 0.178 | 34 | 0.125 | 0.129 | N | 0.57 | SignalP-noTM |

|          |          |          |          |                            |
|----------|----------|----------|----------|----------------------------|
| 0.1065   | 0.022183 | 0.201974 | 0.110219 | gj_188522306_gb_ACD60251_1 |
| 0.094319 | 0.000394 | 0.135053 | 0.076589 | gj_188522308_gb_ACD60253_1 |
| 0.134703 | 0.04429  | 0.181087 | 0.11936  | gj_188522309_gb_ACD60254_1 |
| 0.050498 | 0.14629  | 0.131244 | 0.109344 | gj_188522315_gb_ACD60260_1 |
| 0.109389 | 0.005427 | 0.121319 | 0.078712 | gj_188522316_gb_ACD60261_1 |
| 0.112047 | 0.053302 | 0.112946 | 0.092765 | gj_188522317_gb_ACD60262_1 |
| 0.129544 | 0.042533 | 0.178433 | 0.116837 | gj_188522318_gb_ACD60263_1 |
| 0.357094 | 0.445468 | 0.45289  | 0.418484 | gj_188522319_gb_ACD60264_1 |
| 0.113247 | 0.219943 | 0.23308  | 0.188757 | gj_188522320_gb_ACD60265_1 |
| 0.740775 | 0.869438 | 0.828069 | 0.812761 | gj_528897488_gb_ACD60195_2 |
| 0.163557 | 0.84954  | 0.123901 | 0.378999 | gj_188522322_gb_ACD60267_1 |
| 0.127862 | 0.042656 | 0.168962 | 0.11316  | gj_188522326_gb_ACD60271_1 |
| 0.136461 | 0.072225 | 0.183772 | 0.130819 | gj_188522327_gb_ACD60272_1 |
| 0.94745  | 0.999063 | 0.92194  | 0.956151 | gj_188522385_gb_ACD60330_1 |
| 0.123901 | 0.015217 | 0.183322 | 0.10748  | gj_188522386_gb_ACD60331_1 |
| 0.290904 | 0.558235 | 0.417511 | 0.422217 | gj_188522387_gb_ACD60332_1 |
| 0.917056 | 0.942622 | 0.919309 | 0.926329 | gj_188522388_gb_ACD60333_1 |
| 0.850306 | 0.98722  | 0.876099 | 0.904542 | gj_188522397_gb_ACD60342_1 |
| 0.239031 | 0.13193  | 0.311096 | 0.227352 | gj_188522398_gb_ACD60343_1 |
| 0.900966 | 0.999186 | 0.868756 | 0.922969 | gj_188522399_gb_ACD60344_1 |
| 0.125209 | 0.102569 | 0.115679 | 0.114486 | gj_188522400_gb_ACD60345_1 |
| 0.89853  | 0.999775 | 0.822445 | 0.906917 | gj_188522401_gb_ACD60346_1 |
| 0.100652 | 0.036509 | 0.161515 | 0.099559 | gj_188522402_gb_ACD60347_1 |
| 0.940476 | 0.963385 | 0.904391 | 0.936084 | gj_188522403_gb_ACD60348_1 |
| 0.138596 | 0.584676 | 0.086195 | 0.269822 | gj_188522404_gb_ACD60349_1 |
| 0.169384 | 0.148552 | 0.201491 | 0.173142 | gj_188522405_gb_ACD60350_1 |
| 0.330041 | 0.772239 | 0.446209 | 0.516163 | gj_188522408_gb_ACD60353_1 |
| 0.132619 | 0.050642 | 0.142217 | 0.108493 | gj_188522409_gb_ACD60354_1 |
| 0.271505 | 0.627615 | 0.313028 | 0.404049 | gj_188522410_gb_ACD60355_1 |
| 0.871468 | 0.469289 | 0.879955 | 0.740237 | gj_188522411_gb_ACD60356_1 |
| 0.913331 | 0.999613 | 0.815778 | 0.909574 | gj_188522413_gb_ACD60358_1 |
| 0.820635 | 0.999753 | 0.872138 | 0.930842 | gj_188522415_gb_ACD60360_1 |
| 0.08883  | 0.005641 | 0.       |          |                            |

|                            |       |    |       |    |       |    |       |       |   |      |              |
|----------------------------|-------|----|-------|----|-------|----|-------|-------|---|------|--------------|
| gj_188522287_gb_ACD60232.1 | 0.223 | 49 | 0.26  | 12 | 0.732 | 2  | 0.669 | 0.452 | N | 0.57 | SignalP-noTM |
| gj_188522288_gb_ACD60233.1 | 0.128 | 22 | 0.144 | 22 | 0.207 | 19 | 0.167 | 0.155 | N | 0.57 | SignalP-noTM |
| gj_188522289_gb_ACD60234.1 | 0.144 | 34 | 0.14  | 12 | 0.274 | 1  | 0.191 | 0.164 | N | 0.57 | SignalP-noTM |
| gj_188522290_gb_ACD60235.1 | 0.11  | 24 | 0.098 | 40 | 0.105 | 39 | 0.073 | 0.086 | N | 0.57 | SignalP-noTM |
| gj_188522291_gb_ACD60236.1 | 0.123 | 30 | 0.108 | 30 | 0.118 | 1  | 0.084 | 0.097 | N | 0.57 | SignalP-noTM |
| gj_188522292_gb_ACD60237.1 | 0.156 | 42 | 0.146 | 42 | 0.234 | 19 | 0.152 | 0.149 | N | 0.57 | SignalP-noTM |
| gj_188522294_gb_ACD60239.1 | 0.832 | 39 | 0.874 | 39 | 0.951 | 29 | 0.672 | 0.779 | Y | 0.57 | SignalP-noTM |
| gj_188522295_gb_ACD60240.1 | 0.143 | 29 | 0.139 | 15 | 0.241 | 3  | 0.152 | 0.144 | N | 0.51 | SignalP-TM   |
| gj_188522296_gb_ACD60241.1 | 0.136 | 30 | 0.117 | 21 | 0.418 | 15 | 0.285 | 0.224 | N | 0.57 | SignalP-noTM |
| gj_188522299_gb_ACD60244.1 | 0.108 | 21 | 0.101 | 70 | 0.111 | 70 | 0.083 | 0.093 | N | 0.57 | SignalP-noTM |
| gj_188522300_gb_ACD60245.1 | 0.113 | 25 | 0.127 | 55 | 0.21  | 50 | 0.098 | 0.113 | N | 0.57 | SignalP-noTM |
| gj_188522304_gb_ACD60249.1 | 0.11  | 52 | 0.104 | 58 | 0.165 | 48 | 0.083 | 0.096 | N | 0.51 | SignalP-TM   |
| gj_188522305_gb_ACD60250.1 | 0.505 | 20 | 0.415 | 20 | 0.589 | 16 | 0.385 | 0.401 | N | 0.57 | SignalP-noTM |
| gj_188522306_gb_ACD60251.1 | 0.153 | 37 | 0.244 | 11 | 0.723 | 1  | 0.61  | 0.379 | N | 0.51 | SignalP-TM   |
| gj_188522308_gb_ACD60253.1 | 0.127 | 39 | 0.104 | 39 | 0.103 | 55 | 0.078 | 0.092 | N | 0.57 | SignalP-noTM |
| gj_188522309_gb_ACD60254.1 | 0.333 | 29 | 0.25  | 29 | 0.401 | 21 | 0.212 | 0.232 | N | 0.57 | SignalP-noTM |
| gj_188522315_gb_ACD60260.1 | 0.128 | 32 | 0.112 | 51 | 0.139 | 48 | 0.094 | 0.104 | N | 0.57 | SignalP-noTM |
| gj_188522316_gb_ACD60261.1 | 0.114 | 27 | 0.108 | 11 | 0.165 | 1  | 0.113 | 0.11  | N | 0.57 | SignalP-noTM |
| gj_188522317_gb_ACD60262.1 | 0.244 | 29 | 0.15  | 29 | 0.171 | 38 | 0.087 | 0.121 | N | 0.57 | SignalP-noTM |
| gj_188522318_gb_ACD60263.1 | 0.11  | 30 | 0.11  | 53 | 0.141 | 1  | 0.106 | 0.108 | N | 0.57 | SignalP-noTM |
| gj_188522319_gb_ACD60264.1 | 0.795 | 19 | 0.778 | 19 | 0.928 | 15 | 0.785 | 0.781 | Y | 0.57 | SignalP-noTM |
| gj_188522320_gb_ACD60265.1 | 0.217 | 37 | 0.154 | 37 | 0.152 | 32 | 0.104 | 0.136 | N | 0.51 | SignalP-TM   |
| gj_188522322_gb_ACD60267.1 | 0.144 | 23 | 0.132 | 52 | 0.138 | 41 | 0.1   | 0.112 | N | 0.57 | SignalP-noTM |
| gj_188522326_gb_ACD60271.1 | 0.11  | 51 | 0.132 | 12 | 0.258 | 4  | 0.176 | 0.153 | N | 0.57 | SignalP-noTM |
| gj_188522327_gb_ACD60272.1 | 0.11  | 70 | 0.119 | 34 | 0.189 | 26 | 0.098 | 0.109 | N | 0.57 | SignalP-noTM |
| gj_188522385_gb_ACD60330.1 | 0.115 | 42 | 0.101 | 42 | 0.109 | 39 | 0.076 | 0.089 | N | 0.57 | SignalP-noTM |
| gj_188522386_gb_ACD60331.1 | 0.178 | 19 | 0.117 | 19 | 0.169 | 2  | 0.099 | 0.108 | N | 0.57 | SignalP-noTM |
| gj_188522387_gb_ACD60332.1 | 0.117 | 56 | 0.127 | 11 | 0.227 | 2  | 0.169 | 0.147 | N | 0.57 | SignalP-noTM |
| gj_188522388_gb_ACD60333.1 | 0.132 | 51 | 0.115 | 51 | 0.131 | 23 | 0.092 | 0.104 | N | 0.57 | SignalP-noTM |
| gj_188522397_gb_ACD60342.1 | 0.149 | 55 | 0.14  | 11 | 0.265 | 4  | 0.209 | 0.173 | N | 0.57 | SignalP-noTM |
| gj_188522398_gb_ACD60343.1 | 0.11  | 33 | 0.12  | 33 | 0.189 | 2  | 0.122 | 0.121 | N | 0.57 | SignalP-noTM |
| gj_188522399_gb_ACD60344.1 | 0.476 | 34 | 0.484 | 34 | 0.977 | 17 | 0.783 | 0.624 | Y | 0.57 | SignalP-noTM |
| gj_188522400_gb_ACD60345.1 | 0.104 | 33 | 0.119 | 33 | 0.186 | 2  | 0.123 | 0.121 | N | 0.57 | SignalP-noTM |
| gj_188522401_gb_ACD60346.1 | 0.566 | 21 | 0.447 | 21 | 0.608 | 8  | 0.399 | 0.425 | N | 0.57 | SignalP-noTM |
| gj_188522402_gb_ACD60347.1 | 0.152 | 46 | 0.123 | 46 | 0.134 | 9  | 0.092 | 0.108 | N | 0.57 | SignalP-noTM |
| gj_188522403_gb_ACD60348.1 | 0.154 | 46 | 0.118 | 46 | 0.125 | 1  | 0.093 | 0.106 | N | 0.57 | SignalP-noTM |
| gj_188522404_gb_ACD60349.1 | 0.15  | 39 | 0.247 | 18 | 0.578 | 1  | 0.434 | 0.335 | N | 0.57 | SignalP-noTM |
| gj_188522405_gb_ACD60350.1 | 0.218 | 25 | 0.184 | 25 | 0.408 | 1  | 0.193 | 0.188 | N | 0.57 | SignalP-noTM |
| gj_188522408_gb_ACD60353.1 | 0.103 | 26 | 0.117 | 20 | 0.177 | 18 | 0.14  | 0.128 | N | 0.57 | SignalP-noTM |
| gj_188522409_gb_ACD60354.1 | 0.12  | 53 | 0.117 | 31 | 0.161 | 16 | 0.116 | 0.117 | N | 0.57 | SignalP-noTM |
| gj_188522410_gb_ACD60355.1 | 0.156 | 42 | 0.146 | 42 | 0.219 | 19 | 0.143 | 0.145 | N | 0.57 | SignalP-noTM |
| gj_188522411_gb_ACD60356.1 | 0.12  | 27 | 0.144 | 11 | 0.261 | 25 | 0.22  | 0.179 | N | 0.57 | SignalP-noTM |
| gj_188522413_gb_ACD60358.1 | 0.104 | 10 | 0.131 | 18 | 0.222 | 9  | 0.146 | 0.138 | N | 0.57 | SignalP-noTM |
| gj_188522415_gb_ACD60360.1 | 0.44  | 24 | 0.644 | 24 | 0.963 | 14 | 0.921 | 0.774 | Y | 0.57 | SignalP-noTM |
| gj_188522416_gb_ACD60361.1 | 0.378 | 24 | 0.456 | 24 | 0.763 | 20 | 0.511 | 0.482 | N | 0.57 | SignalP-noTM |
| gj_188522417_gb_ACD60362.1 | 0.157 | 43 | 0.134 | 43 | 0.169 | 23 | 0.109 | 0.122 | N | 0.57 | SignalP-noTM |
| gj_188522418_gb_ACD60363.1 | 0.227 | 32 | 0.219 | 32 | 0.384 | 1  | 0.234 | 0.226 | N | 0.57 | SignalP-noTM |
| gj_188522419_gb_ACD60364.1 | 0.13  | 40 | 0.115 | 18 | 0.171 | 8  | 0.125 | 0.119 | N | 0.51 | SignalP-TM   |
| gj_188522420_gb_ACD60365.1 | 0.192 | 41 | 0.27  | 41 | 0.55  | 40 | 0.263 | 0.267 | N | 0.57 | SignalP-noTM |
| gj_188522422_gb_ACD60367.1 | 0.126 | 12 | 0.121 | 35 | 0.179 | 24 | 0.107 | 0.115 | N | 0.57 | SignalP-noTM |
| gj_188522423_gb_ACD60368.1 | 0.125 | 10 | 0.106 | 39 | 0.123 | 42 | 0.085 | 0.096 | N | 0.57 | SignalP-noTM |
| gj_188522424_gb_ACD60369.1 | 0.143 | 26 | 0.117 | 11 | 0.506 | 1  | 0.268 | 0.216 | N | 0.57 | SignalP-noTM |
| gj_188522425_gb_ACD60370.1 | 0.115 | 37 | 0.113 | 37 | 0.142 | 11 | 0.111 | 0.112 | N | 0.57 | SignalP-noTM |
| gj_188522426_gb_ACD60371.1 | 0.179 | 46 | 0.202 | 46 | 0.395 | 35 | 0.14  | 0.173 | N | 0.57 | SignalP-noTM |
| gj_188522427_gb_ACD60372.1 | 0.386 | 21 | 0.379 | 21 | 0.615 | 1  | 0.434 | 0.404 | N | 0.57 | SignalP-noTM |
| gj_188522432_gb_ACD60377.1 | 0.209 | 35 | 0.128 | 35 | 0.123 | 13 | 0.082 | 0.111 | N | 0.51 | SignalP-TM   |
| gj_188522433_gb_ACD60378.1 | 0.122 | 33 | 0.145 | 18 | 0.32  | 16 | 0.189 | 0.166 | N | 0.57 | SignalP-noTM |
| gj_188522434_gb_ACD60379.1 | 0.113 | 50 | 0.106 | 70 | 0.12  | 69 | 0.085 | 0.096 | N | 0.57 | SignalP-noTM |
| gj_188522444_gb_ACD60389.1 | 0.178 | 27 | 0.187 | 27 | 0.399 | 26 | 0.154 | 0.171 | N | 0.57 | SignalP-noTM |
| gj_188522445_gb_ACD60390.1 | 0.12  | 25 | 0.167 | 12 | 0.411 | 1  | 0.264 | 0.213 | N | 0.57 | SignalP-noTM |
| gj_188522446_gb_ACD60391.1 | 0.11  | 41 | 0.2   | 11 | 0.494 | 3  | 0.401 | 0.294 | N | 0.57 | SignalP-noTM |
| gj_188522454_gb_ACD60399.1 | 0.107 | 54 | 0.194 | 47 | 0.523 | 40 | 0.177 | 0.186 | N | 0.57 | SignalP-noTM |
| gj_188522470_gb_ACD60415.1 | 0.139 | 15 | 0.195 | 15 | 0.55  | 1  | 0.301 | 0.245 | N | 0.57 | SignalP-noTM |
| gj_188522471_gb_ACD60416.1 | 0.114 | 53 | 0.103 | 53 | 0.125 | 13 | 0.082 | 0.093 | N | 0.57 | SignalP-noTM |
| gj_188522472_gb_ACD60417.1 | 0.263 | 40 | 0.197 | 40 | 0.233 | 39 | 0.107 | 0.155 | N | 0.57 | SignalP-noTM |
| gj_188522473_gb_ACD60418.1 | 0.114 | 50 | 0.106 | 61 | 0.12  | 52 | 0.075 | 0.091 | N | 0.57 | SignalP-noTM |
| gj_188522474_gb_ACD60419.1 | 0.157 | 20 | 0.128 | 20 | 0.148 | 1  | 0.108 | 0.119 | N | 0.57 | SignalP-noTM |
| gj_188522476_gb_ACD60421.1 | 0.211 | 26 | 0.308 | 21 | 0.694 | 13 | 0.577 | 0.408 | N | 0.51 | SignalP-TM   |
| gj_188522477_gb_ACD60422.1 | 0.128 | 29 | 0.123 | 29 | 0.141 | 26 | 0.098 | 0.111 | N | 0.57 | SignalP-noTM |
| gj_188522478_gb_ACD60423.1 | 0.117 | 69 | 0.12  | 47 | 0.177 | 42 | 0.099 | 0.11  | N | 0.57 | SignalP-noTM |
| gj_188522481_gb_ACD60426.1 | 0.117 | 27 | 0.168 | 17 | 0.331 | 16 | 0.241 | 0.195 | N | 0.51 | SignalP-TM   |
| gj_188522482_gb_ACD60427.1 | 0.199 | 38 | 0.138 | 38 | 0.244 | 1  | 0.128 | 0.134 | N | 0.57 | SignalP-noTM |
| gj_188522487_gb_ACD60432.1 | 0.269 | 43 | 0.206 | 43 | 0.365 | 41 | 0.123 | 0.167 | N | 0.57 | SignalP-noTM |
| gj_188522489_gb_ACD60434.1 | 0.148 | 24 | 0.164 | 11 | 0.379 | 2  | 0.279 | 0.218 | N | 0.57 | SignalP-noTM |
| gj_188522497_gb_ACD60442.1 | 0.281 | 24 | 0.174 | 24 | 0.144 | 23 | 0.098 | 0.146 | N | 0.51 | SignalP-TM   |
| gj_188522498_gb_ACD60443.1 | 0.123 | 59 | 0.108 | 59 | 0.122 | 54 | 0.088 | 0.099 | N | 0.57 | SignalP-noTM |
| gj_188522499_gb_ACD60444.1 | 0.184 | 24 | 0.154 | 24 | 0.221 | 20 | 0.129 | 0.142 | N | 0.57 | SignalP-noTM |
| gj_188522500_gb_ACD60445.1 | 0.227 | 37 | 0.306 | 37 | 0.561 | 26 | 0.255 | 0.282 | N | 0.57 | SignalP-noTM |

|          |          |          |          |                             |
|----------|----------|----------|----------|-----------------------------|
| 0.324098 | 0.318863 | 0.45289  | 0.365284 | gj_188522522_gb_ACD604671.1 |
| 0.082489 | 0.029627 | 0.093553 | 0.068556 | gj_188522523_gb_ACD60468.1  |
| 0.198134 | 0.732041 | 0.245085 | 0.391753 | gj_188522524_gb_ACD60469.1  |
| 0.392218 | 0.491751 | 0.583948 | 0.489306 | gj_188522525_gb_ACD60470.1  |
| 0.10736  | 0.045045 | 0.132964 | 0.095123 | gj_188522526_gb_ACD60471.1  |
| 0.393649 | 0.082489 | 0.476018 | 0.317385 | gj_188522527_gb_ACD60472.1  |
| 0.208334 | 0.02836  | 0.272693 | 0.169796 | gj_188522528_gb_ACD60473.1  |
| 0.155513 | 0.072024 | 0.17581  | 0.134449 | gj_188522529_gb_ACD60474.1  |
| 0.256355 | 0.617039 | 0.309171 | 0.394188 | gj_188522530_gb_ACD60475.1  |
| 0.227233 | 0.344795 | 0.41314  | 0.328389 | gj_188522531_gb_ACD60476.1  |
| 0.194818 | 0.045304 | 0.225657 | 0.15526  | gj_188522533_gb_ACD60478.1  |
| 0.227233 | 0.024507 | 0.174942 | 0.142227 | gj_188522535_gb_ACD60480.1  |
| 0.20587  | 0.033862 | 0.285978 | 0.175237 | gj_188522537_gb_ACD60482.1  |
| 0.164792 | 0.084556 | 0.21738  | 0.155576 | gj_188522539_gb_ACD60484.1  |
| 0.589766 | 0.568565 | 0.700357 | 0.619563 | gj_188522543_gb_ACD60488.1  |
| 0.424824 | 0.929955 | 0.599168 | 0.651316 | gj_188522545_gb_ACD60490.1  |
| 0.20538  | 0.047834 | 0.183322 | 0.145512 | gj_188522549_gb_ACD60494.1  |
| 0.143318 | 0.345473 | 0.201491 | 0.230094 | gj_188522550_gb_ACD60495.1  |
| 0.703496 | 0.888251 | 0.823319 | 0.805022 | gj_188522551_gb_ACD60496.1  |
| 0.117845 | 0.459588 | 0.099571 | 0.225668 | gj_188522558_gb_ACD60503.1  |
| 0.071226 | 0.006909 | 0.097969 | 0.058701 | gj_188522559_gb_ACD60504.1  |
| 0.070045 | 0.000195 | 0.118157 | 0.062799 | gj_188522560_gb_ACD60505.1  |
| 0.609926 | 0.122604 | 0.651128 | 0.461219 | gj_188522575_gb_ACD60520.1  |
| 0.074675 | 0.5015   | 0.189233 | 0.255136 | gj_188522578_gb_ACD60523.1  |
| 0.076775 | 0.175375 | 0.13717  | 0.129773 | gj_188522579_gb_ACD60524.1  |
| 0.829346 | 0.229878 | 0.575176 | 0.5448   | gj_188522580_gb_ACD60525.1  |
| 0.111452 | 0.296504 | 0.215853 | 0.207936 | gj_188522582_gb_ACD60527.1  |
| 0.119098 | 0.050498 | 0.141851 | 0.103816 | gj_188522583_gb_ACD60528.1  |
| 0.125209 | 0.043898 | 0.132274 | 0.10046  | gj_188522584_gb_ACD60529.1  |
| 0.233617 | 0.35503  | 0.281102 | 0.289916 | gj_188522588_gb_ACD60533.1  |
| 0.063864 | 0.031038 | 0.10736  | 0.067421 | gj_188522591_gb_ACD60536.1  |
| 0.333366 | 0.030149 | 0.349554 | 0.237669 | gj_1885225                  |

|                            |       |    |       |    |       |    |       |       |   |      |              |
|----------------------------|-------|----|-------|----|-------|----|-------|-------|---|------|--------------|
| gj_188522501_gb_ACD60446.1 | 0.294 | 23 | 0.259 | 23 | 0.424 | 1  | 0.252 | 0.256 | N | 0.51 | SignalP-TM   |
| gj_188522502_gb_ACD60447.1 | 0.103 | 44 | 0.125 | 30 | 0.21  | 26 | 0.148 | 0.136 | N | 0.57 | SignalP-noTM |
| gj_188522503_gb_ACD60448.1 | 0.245 | 35 | 0.242 | 35 | 0.353 | 34 | 0.187 | 0.222 | N | 0.51 | SignalP-TM   |
| gj_188522504_gb_ACD60449.1 | 0.186 | 36 | 0.19  | 36 | 0.343 | 13 | 0.217 | 0.2   | N | 0.51 | SignalP-TM   |
| gj_188522507_gb_ACD60452.1 | 0.423 | 22 | 0.578 | 22 | 0.91  | 19 | 0.754 | 0.661 | Y | 0.57 | SignalP-noTM |
| gj_188522508_gb_ACD60453.1 | 0.114 | 37 | 0.123 | 26 | 0.182 | 34 | 0.128 | 0.125 | N | 0.57 | SignalP-noTM |
| gj_188522509_gb_ACD60454.1 | 0.117 | 57 | 0.201 | 11 | 0.526 | 4  | 0.404 | 0.297 | N | 0.57 | SignalP-noTM |
| gj_188522513_gb_ACD60458.1 | 0.118 | 19 | 0.104 | 70 | 0.12  | 31 | 0.085 | 0.095 | N | 0.57 | SignalP-noTM |
| gj_188522514_gb_ACD60459.1 | 0.137 | 30 | 0.146 | 14 | 0.241 | 1  | 0.211 | 0.177 | N | 0.57 | SignalP-noTM |
| gj_528897491_gb_ACD60463.2 | 0.169 | 49 | 0.143 | 49 | 0.195 | 12 | 0.13  | 0.137 | N | 0.57 | SignalP-noTM |
| gj_188522519_gb_ACD60464.1 | 0.115 | 22 | 0.144 | 22 | 0.268 | 11 | 0.186 | 0.163 | N | 0.57 | SignalP-noTM |
| gj_188522520_gb_ACD60465.1 | 0.136 | 30 | 0.124 | 30 | 0.238 | 29 | 0.092 | 0.109 | N | 0.57 | SignalP-noTM |
| gj_188522522_gb_ACD60467.1 | 0.115 | 50 | 0.116 | 50 | 0.212 | 1  | 0.114 | 0.115 | N | 0.57 | SignalP-noTM |
| gj_188522523_gb_ACD60468.1 | 0.139 | 43 | 0.14  | 11 | 0.268 | 2  | 0.199 | 0.168 | N | 0.57 | SignalP-noTM |
| gj_188522524_gb_ACD60469.1 | 0.105 | 32 | 0.155 | 13 | 0.325 | 4  | 0.249 | 0.199 | N | 0.57 | SignalP-noTM |
| gj_188522525_gb_ACD60470.1 | 0.11  | 46 | 0.136 | 13 | 0.25  | 7  | 0.187 | 0.16  | N | 0.57 | SignalP-noTM |
| gj_188522526_gb_ACD60471.1 | 0.125 | 19 | 0.207 | 14 | 0.42  | 12 | 0.343 | 0.271 | N | 0.57 | SignalP-noTM |
| gj_188522527_gb_ACD60472.1 | 0.32  | 29 | 0.482 | 29 | 0.928 | 26 | 0.573 | 0.525 | N | 0.57 | SignalP-noTM |
| gj_188522528_gb_ACD60473.1 | 0.197 | 19 | 0.118 | 19 | 0.123 | 1  | 0.082 | 0.101 | N | 0.57 | SignalP-noTM |
| gj_188522529_gb_ACD60474.1 | 0.11  | 53 | 0.128 | 11 | 0.187 | 8  | 0.171 | 0.148 | N | 0.57 | SignalP-noTM |
| gj_188522530_gb_ACD60475.1 | 0.172 | 29 | 0.236 | 29 | 0.536 | 2  | 0.346 | 0.288 | N | 0.57 | SignalP-noTM |
| gj_188522531_gb_ACD60476.1 | 0.154 | 42 | 0.144 | 42 | 0.21  | 19 | 0.138 | 0.141 | N | 0.57 | SignalP-noTM |
| gj_188522533_gb_ACD60478.1 | 0.701 | 59 | 0.329 | 59 | 0.229 | 49 | 0.11  | 0.226 | N | 0.57 | SignalP-noTM |
| gj_188522535_gb_ACD60480.1 | 0.116 | 18 | 0.167 | 37 | 0.376 | 32 | 0.198 | 0.181 | N | 0.57 | SignalP-noTM |
| gj_188522537_gb_ACD60482.1 | 0.126 | 43 | 0.139 | 43 | 0.19  | 42 | 0.124 | 0.133 | N | 0.51 | SignalP-TM   |
| gj_188522539_gb_ACD60484.1 | 0.111 | 55 | 0.145 | 12 | 0.268 | 7  | 0.215 | 0.178 | N | 0.57 | SignalP-noTM |
| gj_188522543_gb_ACD60488.1 | 0.308 | 10 | 0.176 | 21 | 0.238 | 9  | 0.112 | 0.146 | N | 0.57 | SignalP-noTM |
| gj_188522545_gb_ACD60490.1 | 0.11  | 36 | 0.144 | 11 | 0.292 | 3  | 0.21  | 0.175 | N | 0.57 | SignalP-noTM |
| gj_188522549_gb_ACD60494.1 | 0.367 | 37 | 0.229 | 37 | 0.236 | 36 | 0.106 | 0.171 | N | 0.57 | SignalP-noTM |
| gj_188522550_gb_ACD60495.1 | 0.137 | 34 | 0.095 | 66 | 0.102 | 59 | 0.062 | 0.083 | N | 0.51 | SignalP-TM   |
| gj_188522551_gb_ACD60496.1 | 0.111 | 9  | 0.103 | 70 | 0.119 | 39 | 0.085 | 0.095 | N | 0.57 | SignalP-noTM |
| gj_188522558_gb_ACD60503.1 | 0.292 | 29 | 0.237 | 29 | 0.334 | 5  | 0.235 | 0.236 | N | 0.51 | SignalP-TM   |
| gj_188522559_gb_ACD60504.1 | 0.155 | 38 | 0.232 | 38 | 0.487 | 30 | 0.22  | 0.226 | N | 0.57 | SignalP-noTM |
| gj_188522560_gb_ACD60505.1 | 0.121 | 24 | 0.102 | 65 | 0.111 | 53 | 0.083 | 0.093 | N | 0.57 | SignalP-noTM |
| gj_188522575_gb_ACD60520.1 | 0.113 | 9  | 0.135 | 36 | 0.206 | 29 | 0.146 | 0.14  | N | 0.57 | SignalP-noTM |
| gj_188522578_gb_ACD60523.1 | 0.108 | 27 | 0.099 | 11 | 0.143 | 2  | 0.097 | 0.098 | N | 0.51 | SignalP-TM   |
| gj_188522579_gb_ACD60524.1 | 0.121 | 36 | 0.102 | 17 | 0.126 | 9  | 0.093 | 0.099 | N | 0.51 | SignalP-TM   |
| gj_188522580_gb_ACD60525.1 | 0.1   | 50 | 0.116 | 48 | 0.171 | 43 | 0.116 | 0.116 | N | 0.57 | SignalP-noTM |
| gj_188522582_gb_ACD60527.1 | 0.139 | 52 | 0.113 | 41 | 0.216 | 38 | 0.11  | 0.112 | N | 0.51 | SignalP-TM   |
| gj_188522583_gb_ACD60528.1 | 0.127 | 41 | 0.15  | 28 | 0.267 | 20 | 0.185 | 0.167 | N | 0.57 | SignalP-noTM |
| gj_188522584_gb_ACD60529.1 | 0.127 | 32 | 0.123 | 21 | 0.183 | 38 | 0.117 | 0.12  | N | 0.57 | SignalP-noTM |
| gj_188522588_gb_ACD60533.1 | 0.169 | 23 | 0.192 | 23 | 0.418 | 35 | 0.243 | 0.216 | N | 0.57 | SignalP-noTM |
| gj_188522591_gb_ACD60536.1 | 0.109 | 21 | 0.143 | 11 | 0.26  | 1  | 0.198 | 0.169 | N | 0.57 | SignalP-noTM |
| gj_188522592_gb_ACD60537.1 | 0.233 | 18 | 0.194 | 18 | 0.431 | 1  | 0.194 | 0.194 | N | 0.57 | SignalP-noTM |
| gj_188522593_gb_ACD60538.1 | 0.174 | 20 | 0.173 | 20 | 0.289 | 18 | 0.163 | 0.168 | N | 0.57 | SignalP-noTM |
| gj_188522595_gb_ACD60540.1 | 0.819 | 25 | 0.841 | 25 | 0.909 | 20 | 0.843 | 0.842 | Y | 0.57 | SignalP-noTM |
| gj_188522596_gb_ACD60541.1 | 0.116 | 22 | 0.127 | 11 | 0.215 | 1  | 0.159 | 0.142 | N | 0.57 | SignalP-noTM |
| gj_188522597_gb_ACD60542.1 | 0.414 | 32 | 0.631 | 32 | 0.998 | 22 | 0.962 | 0.786 | Y | 0.57 | SignalP-noTM |
| gj_188522598_gb_ACD60543.1 | 0.135 | 44 | 0.158 | 44 | 0.294 | 4  | 0.153 | 0.155 | N | 0.57 | SignalP-noTM |
| gj_188522599_gb_ACD60544.1 | 0.101 | 33 | 0.102 | 62 | 0.126 | 5  | 0.086 | 0.094 | N | 0.57 | SignalP-noTM |
| gj_188522600_gb_ACD60545.1 | 0.136 | 23 | 0.335 | 23 | 0.934 | 2  | 0.87  | 0.586 | Y | 0.57 | SignalP-noTM |
| gj_188522601_gb_ACD60546.1 | 0.118 | 67 | 0.145 | 11 | 0.31  | 1  | 0.207 | 0.168 | N | 0.51 | SignalP-TM   |
| gj_188522602_gb_ACD60547.1 | 0.125 | 56 | 0.127 | 12 | 0.19  | 10 | 0.158 | 0.141 | N | 0.57 | SignalP-noTM |
| gj_188522603_gb_ACD60548.1 | 0.238 | 28 | 0.191 | 28 | 0.443 | 2  | 0.204 | 0.196 | N | 0.51 | SignalP-TM   |
| gj_188522604_gb_ACD60549.1 | 0.136 | 18 | 0.155 | 18 | 0.259 | 1  | 0.173 | 0.164 | N | 0.57 | SignalP-noTM |
| gj_188522605_gb_ACD60550.1 | 0.178 | 65 | 0.129 | 65 | 0.113 | 4  | 0.084 | 0.108 | N | 0.57 | SignalP-noTM |
| gj_188522606_gb_ACD60551.1 | 0.453 | 20 | 0.341 | 20 | 0.388 | 16 | 0.226 | 0.287 | N | 0.57 | SignalP-noTM |
| gj_188522611_gb_ACD60556.1 | 0.1   | 49 | 0.142 | 11 | 0.286 | 1  | 0.196 | 0.167 | N | 0.57 | SignalP-noTM |
| gj_188522615_gb_ACD60560.1 | 0.185 | 28 | 0.133 | 28 | 0.113 | 1  | 0.094 | 0.115 | N | 0.57 | SignalP-noTM |
| gj_188522622_gb_ACD60567.1 | 0.219 | 28 | 0.146 | 28 | 0.157 | 1  | 0.106 | 0.127 | N | 0.57 | SignalP-noTM |
| gj_188522632_gb_ACD60577.1 | 0.541 | 15 | 0.611 | 15 | 0.83  | 14 | 0.695 | 0.65  | Y | 0.57 | SignalP-noTM |
| gj_188522636_gb_ACD60581.1 | 0.869 | 22 | 0.916 | 22 | 0.984 | 10 | 0.957 | 0.935 | Y | 0.57 | SignalP-noTM |
| gj_188522637_gb_ACD60582.1 | 0.341 | 13 | 0.263 | 13 | 0.318 | 9  | 0.202 | 0.234 | N | 0.57 | SignalP-noTM |
| gj_188522638_gb_ACD60583.1 | 0.269 | 31 | 0.409 | 29 | 0.764 | 25 | 0.538 | 0.457 | N | 0.51 | SignalP-TM   |
| gj_188522639_gb_ACD60584.1 | 0.108 | 30 | 0.132 | 11 | 0.25  | 2  | 0.17  | 0.15  | N | 0.57 | SignalP-noTM |
| gj_188522642_gb_ACD60587.1 | 0.14  | 64 | 0.113 | 21 | 0.144 | 12 | 0.105 | 0.109 | N | 0.57 | SignalP-noTM |
| gj_188522644_gb_ACD60589.1 | 0.136 | 34 | 0.104 | 34 | 0.103 | 70 | 0.075 | 0.09  | N | 0.57 | SignalP-noTM |
| gj_188522645_gb_ACD60590.1 | 0.33  | 45 | 0.221 | 45 | 0.279 | 35 | 0.13  | 0.178 | N | 0.57 | SignalP-noTM |
| gj_188522646_gb_ACD60591.1 | 0.234 | 29 | 0.417 | 29 | 0.948 | 16 | 0.843 | 0.618 | Y | 0.57 | SignalP-noTM |
| gj_188522647_gb_ACD60592.1 | 0.105 | 45 | 0.105 | 51 | 0.184 | 42 | 0.087 | 0.096 | N | 0.57 | SignalP-noTM |
| gj_188522648_gb_ACD60593.1 | 0.103 | 21 | 0.107 | 26 | 0.16  | 20 | 0.105 | 0.106 | N | 0.57 | SignalP-noTM |
| gj_188522651_gb_ACD60596.1 | 0.117 | 15 | 0.114 | 29 | 0.176 | 27 | 0.111 | 0.113 | N | 0.57 | SignalP-noTM |
| gj_188522656_gb_ACD60601.1 | 0.121 | 36 | 0.128 | 20 | 0.204 | 19 | 0.138 | 0.133 | N | 0.57 | SignalP-noTM |
| gj_188522659_gb_ACD60604.1 | 0.162 | 27 | 0.143 | 27 | 0.208 | 2  | 0.147 | 0.145 | N | 0.57 | SignalP-noTM |
| gj_188522660_gb_ACD60605.1 | 0.222 | 45 | 0.213 | 13 | 0.534 | 6  | 0.457 | 0.328 | N | 0.57 | SignalP-noTM |
| gj_188522662_gb_ACD60607.1 | 0.108 | 31 | 0.14  | 43 | 0.289 | 39 | 0.149 | 0.144 | N | 0.57 | SignalP-noTM |
| gj_188522664_gb_ACD60609.1 | 0.133 | 22 | 0.158 | 22 | 0.292 | 11 | 0.194 | 0.175 | N | 0.57 | SignalP-noTM |
| gj_188522670_gb_ACD60615.1 | 0.213 | 28 | 0.417 | 28 | 0.918 | 16 | 0.837 | 0.614 | Y | 0.57 | SignalP-noTM |

|          |          |          |          |                            |
|----------|----------|----------|----------|----------------------------|
| 0.177994 | 0.131587 | 0.110859 | 0.140147 | gj_188522687_gb_ACD60632.1 |
| 0.305339 | 0.013242 | 0.342764 | 0.220448 | gj_188522688_gb_ACD60633.1 |
| 0.093046 | 0.117533 | 0.182426 | 0.131002 | gj_188522689_gb_ACD60634.1 |
| 0.920853 | 0.891775 | 0.8935   | 0.902043 | gj_188522690_gb_ACD60635.1 |
| 0.912855 | 0.284144 | 0.910926 | 0.702642 | gj_188522691_gb_ACD60636.1 |
| 0.172359 | 0.125209 | 0.17023  | 0.155933 | gj_188522692_gb_ACD60637.1 |
| 0.371684 | 0.291523 | 0.274482 | 0.312563 | gj_188522693_gb_ACD60638.1 |
| 0.216346 | 0.259802 | 0.218403 | 0.231184 | gj_188522694_gb_ACD60639.1 |
| 0.127194 | 0.069074 | 0.10736  | 0.101209 | gj_188522695_gb_ACD60640.1 |
| 0.663962 | 0.789182 | 0.666634 | 0.706593 | gj_188522696_gb_ACD60641.1 |
| 0.804711 | 0.971474 | 0.688904 | 0.821696 | gj_188522699_gb_ACD60644.1 |
| 0.199567 | 0.186943 | 0.238486 | 0.208332 | gj_188522700_gb_ACD60645.1 |
| 0.940139 | 0.592667 | 0.911412 | 0.814739 | gj_188522701_gb_ACD60646.1 |
| 0.051368 | 0.087864 | 0.121639 | 0.086957 | gj_188522702_gb_ACD60647.1 |
| 0.217891 | 0.136108 | 0.243977 | 0.199325 | gj_188522705_gb_ACD60650.1 |
| 0.844093 | 0.992775 | 0.666634 | 0.834501 | gj_188522706_gb_ACD60651.1 |
| 0.076562 | 0.01159  | 0.112645 | 0.066932 | gj_188522707_gb_ACD60652.1 |
| 0.112346 | 0.054526 | 0.126861 | 0.097911 | gj_188522708_gb_ACD60653.1 |
| 0.511988 | 0.897707 | 0.424091 | 0.611265 | gj_188522709_gb_ACD60654.1 |
| 0.109881 | 0.070437 | 0.112645 | 0.097588 | gj_188522710_gb_ACD60655.1 |
| 0.109975 | 0.002029 | 0.140035 | 0.083406 | gj_188522711_gb_ACD60656.1 |
| 0.104238 | 0.06985  | 0.164379 | 0.112822 | gj_188522713_gb_ACD60658.1 |
| 0.155513 | 0.087384 | 0.13193  | 0.124942 | gj_188522714_gb_ACD60659.1 |
| 0.127527 | 0.281709 | 0.094063 | 0.167766 | gj_188522724_gb_ACD60669.1 |
| 0.077845 | 0.079365 | 0.157095 | 0.104768 | gj_188522725_gb_ACD60670.1 |
| 0.470036 | 0.242872 | 0.366096 | 0.359668 | gj_188522733_gb_ACD60678.1 |
| 0.198134 | 0.773293 | 0.099302 | 0.35691  | gj_188522737_gb_ACD60682.1 |
| 0.064767 | 0.02516  | 0.099571 | 0.063166 | gj_188522738_gb_ACD60683.1 |
| 0.074675 | 0.022576 | 0.09104  | 0.063824 | gj_188522740_gb_ACD60685.1 |
| 0.065681 | 0.149694 | 0.166034 | 0.171736 | gj_188522741_gb_ACD60686.1 |
| 0.113247 | 0.066982 | 0.106215 | 0.095481 | gj_188522746_gb_ACD60691.1 |
| 0.090052 | 0.001322 | 0.156699 | 0.082691 | gj_18852274                |

|                            |       |    |       |    |       |    |       |       |   |      |              |
|----------------------------|-------|----|-------|----|-------|----|-------|-------|---|------|--------------|
| gj_188522671.gb_ACD606161_ | 0.116 | 31 | 0.099 | 70 | 0.103 | 62 | 0.077 | 0.089 | N | 0.57 | SignalP-noTM |
| gj_188522672.gb_ACD606171_ | 0.182 | 21 | 0.176 | 38 | 0.311 | 27 | 0.155 | 0.168 | N | 0.51 | SignalP-TM   |
| gj_188522673.gb_ACD606181_ | 0.252 | 54 | 0.157 | 54 | 0.153 | 53 | 0.091 | 0.126 | N | 0.57 | SignalP-noTM |
| gj_188522674.gb_ACD606191_ | 0.178 | 17 | 0.282 | 17 | 0.625 | 1  | 0.464 | 0.349 | N | 0.51 | SignalP-TM   |
| gj_188522675.gb_ACD606201_ | 0.131 | 56 | 0.111 | 56 | 0.136 | 36 | 0.091 | 0.102 | N | 0.57 | SignalP-noTM |
| gj_188522676.gb_ACD606211_ | 0.113 | 51 | 0.109 | 35 | 0.19  | 34 | 0.107 | 0.108 | N | 0.57 | SignalP-noTM |
| gj_188522677.gb_ACD606221_ | 0.372 | 26 | 0.593 | 26 | 0.967 | 17 | 0.927 | 0.75  | Y | 0.57 | SignalP-noTM |
| gj_188522678.gb_ACD606231_ | 0.13  | 34 | 0.186 | 11 | 0.47  | 4  | 0.34  | 0.258 | N | 0.57 | SignalP-noTM |
| gj_188522679.gb_ACD606241_ | 0.126 | 30 | 0.138 | 30 | 0.223 | 5  | 0.152 | 0.145 | N | 0.57 | SignalP-noTM |
| gj_188522680.gb_ACD606251_ | 0.128 | 11 | 0.202 | 11 | 0.456 | 9  | 0.332 | 0.263 | N | 0.57 | SignalP-noTM |
| gj_188522681.gb_ACD606261_ | 0.207 | 17 | 0.264 | 17 | 0.654 | 4  | 0.401 | 0.328 | N | 0.57 | SignalP-noTM |
| gj_188522684.gb_ACD606291_ | 0.127 | 36 | 0.113 | 36 | 0.12  | 31 | 0.087 | 0.101 | N | 0.57 | SignalP-noTM |
| gj_188522687.gb_ACD606321_ | 0.159 | 39 | 0.145 | 39 | 0.195 | 37 | 0.111 | 0.129 | N | 0.57 | SignalP-noTM |
| gj_188522688.gb_ACD606331_ | 0.169 | 24 | 0.222 | 24 | 0.629 | 1  | 0.367 | 0.29  | N | 0.57 | SignalP-noTM |
| gj_188522689.gb_ACD606341_ | 0.174 | 20 | 0.148 | 20 | 0.181 | 6  | 0.139 | 0.145 | N | 0.51 | SignalP-TM   |
| gj_188522690.gb_ACD606351_ | 0.499 | 29 | 0.671 | 29 | 0.961 | 19 | 0.892 | 0.775 | Y | 0.57 | SignalP-noTM |
| gj_188522691.gb_ACD606361_ | 0.123 | 36 | 0.156 | 36 | 0.376 | 33 | 0.161 | 0.158 | N | 0.51 | SignalP-TM   |
| gj_188522692.gb_ACD606371_ | 0.151 | 42 | 0.143 | 42 | 0.186 | 37 | 0.101 | 0.128 | N | 0.51 | SignalP-TM   |
| gj_188522693.gb_ACD606381_ | 0.107 | 24 | 0.098 | 24 | 0.123 | 6  | 0.093 | 0.096 | N | 0.51 | SignalP-TM   |
| gj_188522694.gb_ACD606391_ | 0.155 | 21 | 0.259 | 21 | 0.528 | 4  | 0.457 | 0.352 | N | 0.57 | SignalP-noTM |
| gj_188522695.gb_ACD606401_ | 0.126 | 14 | 0.133 | 54 | 0.324 | 50 | 0.106 | 0.12  | N | 0.57 | SignalP-noTM |
| gj_188522698.gb_ACD606431_ | 0.774 | 43 | 0.861 | 43 | 0.987 | 32 | 0.718 | 0.794 | Y | 0.57 | SignalP-noTM |
| gj_188522699.gb_ACD606441_ | 0.136 | 19 | 0.137 | 19 | 0.193 | 1  | 0.142 | 0.139 | N | 0.57 | SignalP-noTM |
| gj_188522700.gb_ACD606451_ | 0.156 | 24 | 0.129 | 24 | 0.122 | 16 | 0.091 | 0.115 | N | 0.51 | SignalP-TM   |
| gj_188522701.gb_ACD606461_ | 0.128 | 46 | 0.115 | 22 | 0.155 | 11 | 0.118 | 0.116 | N | 0.51 | SignalP-TM   |
| gj_188522702.gb_ACD606471_ | 0.111 | 64 | 0.139 | 55 | 0.297 | 49 | 0.131 | 0.135 | N | 0.57 | SignalP-noTM |
| gj_188522705.gb_ACD606501_ | 0.108 | 66 | 0.109 | 25 | 0.134 | 39 | 0.096 | 0.103 | N | 0.57 | SignalP-noTM |
| gj_188522706.gb_ACD606511_ | 0.111 | 28 | 0.108 | 28 | 0.138 | 5  | 0.108 | 0.108 | N | 0.57 | SignalP-noTM |
| gj_188522707.gb_ACD606521_ | 0.123 | 31 | 0.102 | 68 | 0.121 | 38 | 0.083 | 0.093 | N | 0.57 | SignalP-noTM |
| gj_188522708.gb_ACD606531_ | 0.112 | 31 | 0.235 | 11 | 0.649 | 1  | 0.547 | 0.382 | N | 0.57 | SignalP-noTM |
| gj_188522709.gb_ACD606541_ | 0.196 | 24 | 0.143 | 24 | 0.153 | 20 | 0.096 | 0.121 | N | 0.57 | SignalP-noTM |
| gj_188522710.gb_ACD606551_ | 0.128 | 45 | 0.112 | 45 | 0.134 | 20 | 0.094 | 0.104 | N | 0.57 | SignalP-noTM |
| gj_188522711.gb_ACD606561_ | 0.149 | 32 | 0.137 | 11 | 0.264 | 4  | 0.191 | 0.162 | N | 0.57 | SignalP-noTM |
| gj_188522713.gb_ACD606581_ | 0.29  | 23 | 0.261 | 23 | 0.359 | 3  | 0.26  | 0.26  | N | 0.57 | SignalP-noTM |
| gj_188522714.gb_ACD606591_ | 0.131 | 6  | 0.106 | 41 | 0.171 | 3  | 0.109 | 0.107 | N | 0.57 | SignalP-noTM |
| gj_188522724.gb_ACD606691_ | 0.104 | 34 | 0.116 | 41 | 0.164 | 32 | 0.125 | 0.12  | N | 0.57 | SignalP-noTM |
| gj_188522725.gb_ACD606701_ | 0.133 | 49 | 0.119 | 49 | 0.162 | 41 | 0.093 | 0.107 | N | 0.57 | SignalP-noTM |
| gj_188522733.gb_ACD606781_ | 0.128 | 32 | 0.171 | 14 | 0.41  | 29 | 0.302 | 0.233 | N | 0.57 | SignalP-noTM |
| gj_188522737.gb_ACD606821_ | 0.166 | 35 | 0.162 | 35 | 0.322 | 34 | 0.161 | 0.162 | N | 0.57 | SignalP-noTM |
| gj_188522738.gb_ACD606831_ | 0.105 | 20 | 0.102 | 62 | 0.136 | 1  | 0.094 | 0.098 | N | 0.57 | SignalP-noTM |
| gj_188522740.gb_ACD606851_ | 0.161 | 48 | 0.182 | 48 | 0.274 | 45 | 0.142 | 0.164 | N | 0.57 | SignalP-noTM |
| gj_188522741.gb_ACD606861_ | 0.722 | 20 | 0.38  | 20 | 0.289 | 11 | 0.201 | 0.314 | N | 0.51 | SignalP-TM   |
| gj_188522746.gb_ACD606911_ | 0.137 | 18 | 0.11  | 37 | 0.177 | 25 | 0.101 | 0.106 | N | 0.57 | SignalP-noTM |
| gj_188522749.gb_ACD606941_ | 0.178 | 24 | 0.176 | 24 | 0.245 | 1  | 0.175 | 0.175 | N | 0.57 | SignalP-noTM |
| gj_188522750.gb_ACD606951_ | 0.423 | 14 | 0.344 | 14 | 0.458 | 9  | 0.268 | 0.308 | N | 0.57 | SignalP-noTM |
| gj_188522751.gb_ACD606961_ | 0.146 | 34 | 0.15  | 34 | 0.228 | 2  | 0.154 | 0.151 | N | 0.51 | SignalP-TM   |
| gj_188522752.gb_ACD606971_ | 0.135 | 24 | 0.101 | 62 | 0.129 | 3  | 0.087 | 0.095 | N | 0.57 | SignalP-noTM |
| gj_188522757.gb_ACD607021_ | 0.119 | 19 | 0.19  | 12 | 0.485 | 1  | 0.323 | 0.24  | N | 0.51 | SignalP-TM   |
| gj_188522760.gb_ACD607051_ | 0.131 | 46 | 0.153 | 21 | 0.415 | 1  | 0.202 | 0.176 | N | 0.57 | SignalP-noTM |
| gj_188522761.gb_ACD607061_ | 0.212 | 34 | 0.193 | 34 | 0.352 | 39 | 0.182 | 0.188 | N | 0.57 | SignalP-noTM |
| gj_188522762.gb_ACD607071_ | 0.127 | 26 | 0.105 | 54 | 0.151 | 1  | 0.084 | 0.095 | N | 0.57 | SignalP-noTM |
| gj_188522766.gb_ACD607111_ | 0.149 | 30 | 0.124 | 15 | 0.183 | 7  | 0.144 | 0.131 | N | 0.51 | SignalP-TM   |
| gj_188522768.gb_ACD607131_ | 0.117 | 42 | 0.113 | 42 | 0.127 | 12 | 0.099 | 0.106 | N | 0.57 | SignalP-noTM |
| gj_188522769.gb_ACD607141_ | 0.411 | 21 | 0.36  | 21 | 0.517 | 16 | 0.279 | 0.322 | N | 0.57 | SignalP-noTM |
| gj_188522774.gb_ACD607191_ | 0.118 | 21 | 0.17  | 11 | 0.363 | 2  | 0.295 | 0.216 | N | 0.51 | SignalP-TM   |
| gj_188522775.gb_ACD607201_ | 0.125 | 31 | 0.138 | 11 | 0.29  | 1  | 0.18  | 0.157 | N | 0.57 | SignalP-noTM |
| gj_188522776.gb_ACD607211_ | 0.126 | 31 | 0.148 | 31 | 0.264 | 10 | 0.191 | 0.168 | N | 0.57 | SignalP-noTM |
| gj_188522777.gb_ACD607221_ | 0.226 | 26 | 0.294 | 26 | 0.585 | 19 | 0.359 | 0.318 | N | 0.51 | SignalP-TM   |
| gj_188522778.gb_ACD607231_ | 0.544 | 27 | 0.306 | 27 | 0.311 | 5  | 0.204 | 0.268 | N | 0.51 | SignalP-TM   |
| gj_188522779.gb_ACD607241_ | 0.123 | 34 | 0.165 | 34 | 0.307 | 26 | 0.168 | 0.166 | N | 0.51 | SignalP-TM   |
| gj_188522784.gb_ACD607291_ | 0.131 | 48 | 0.104 | 48 | 0.156 | 1  | 0.09  | 0.098 | N | 0.57 | SignalP-noTM |
| gj_188522846.gb_ACD607911_ | 0.166 | 64 | 0.158 | 64 | 0.269 | 53 | 0.158 | 0.158 | N | 0.57 | SignalP-noTM |
| gj_188522847.gb_ACD607921_ | 0.103 | 28 | 0.109 | 33 | 0.127 | 22 | 0.089 | 0.1   | N | 0.57 | SignalP-noTM |
| gj_188522848.gb_ACD607931_ | 0.169 | 56 | 0.149 | 56 | 0.17  | 53 | 0.098 | 0.125 | N | 0.57 | SignalP-noTM |
| gj_188522849.gb_ACD607941_ | 0.12  | 38 | 0.115 | 15 | 0.194 | 13 | 0.129 | 0.122 | N | 0.57 | SignalP-noTM |
| gj_188522850.gb_ACD607951_ | 0.162 | 48 | 0.149 | 48 | 0.199 | 1  | 0.088 | 0.126 | N | 0.51 | SignalP-TM   |
| gj_188522851.gb_ACD607961_ | 0.245 | 19 | 0.399 | 19 | 0.841 | 11 | 0.657 | 0.52  | N | 0.57 | SignalP-noTM |
| gj_188522852.gb_ACD607971_ | 0.129 | 46 | 0.114 | 46 | 0.129 | 30 | 0.102 | 0.109 | N | 0.57 | SignalP-noTM |
| gj_188522853.gb_ACD607981_ | 0.119 | 46 | 0.14  | 14 | 0.269 | 8  | 0.197 | 0.167 | N | 0.57 | SignalP-noTM |
| gj_188522855.gb_ACD608001_ | 0.112 | 65 | 0.102 | 65 | 0.099 | 22 | 0.082 | 0.093 | N | 0.57 | SignalP-noTM |
| gj_188522856.gb_ACD608011_ | 0.288 | 14 | 0.347 | 14 | 0.576 | 10 | 0.415 | 0.379 | N | 0.57 | SignalP-noTM |
| gj_188522857.gb_ACD608021_ | 0.38  | 26 | 0.249 | 26 | 0.312 | 6  | 0.215 | 0.233 | N | 0.57 | SignalP-noTM |
| gj_188522860.gb_ACD608051_ | 0.252 | 13 | 0.251 | 13 | 0.414 | 9  | 0.251 | 0.251 | N | 0.57 | SignalP-noTM |
| gj_188522861.gb_ACD608061_ | 0.147 | 57 | 0.112 | 57 | 0.182 | 3  | 0.093 | 0.103 | N | 0.57 | SignalP-noTM |
| gj_188522862.gb_ACD608071_ | 0.141 | 51 | 0.106 | 12 | 0.176 | 2  | 0.105 | 0.106 | N | 0.51 | SignalP-TM   |
| gj_188522863.gb_ACD608081_ | 0.202 | 62 | 0.149 | 62 | 0.191 | 61 | 0.068 | 0.119 | N | 0.51 | SignalP-TM   |
| gj_188522864.gb_ACD608091_ | 0.357 | 52 | 0.288 | 52 | 0.351 | 48 | 0.192 | 0.253 | N | 0.51 | SignalP-TM   |
| gj_188522867.gb_ACD608121_ | 0.456 | 34 | 0.268 | 34 | 0.573 | 17 | 0.297 | 0.282 | N | 0.57 | SignalP-noTM |

|          |          |          |          |                            |
|----------|----------|----------|----------|----------------------------|
| 0.166866 | 0.02373  | 0.137525 | 0.109374 | gj_188522904.gb_ACD608491_ |
| 0.352287 | 0.852205 | 0.5015   | 0.568664 | gj_188522906.gb_ACD608511_ |
| 0.143318 | 0.073237 | 0.123901 | 0.113485 | gj_188522908.gb_ACD608531_ |
| 0.833134 | 0.923225 | 0.870794 | 0.875718 | gj_188522909.gb_ACD608541_ |
| 0.184673 | 0.443986 | 0.092289 | 0.240316 | gj_188522910.gb_ACD608551_ |
| 0.083862 | 0.03131  | 0.127862 | 0.080110 | gj_188522911.gb_ACD608561_ |
| 0.129882 | 0.904391 | 0.072024 | 0.368766 | gj_188522913.gb_ACD608581_ |
| 0.720713 | 0.995436 | 0.738464 | 0.818204 | gj_188522914.gb_ACD608591_ |
| 0.208829 | 0.864596 | 0.111749 | 0.395058 | gj_188522919.gb_ACD608641_ |
| 0.931311 | 0.913309 | 0.906447 | 0.918022 | gj_188522922.gb_ACD608671_ |
| 0.115679 | 0.059189 | 0.152387 | 0.109085 | gj_188522925.gb_ACD608701_ |
| 0.096129 | 0.064767 | 0.086669 | 0.082522 | gj_188522926.gb_ACD608711_ |
| 0.101197 | 0.06262  | 0.152387 | 0.105401 | gj_188522927.gb_ACD608721_ |
| 0.107647 | 0.013885 | 0.115986 | 0.079173 | gj_188522928.gb_ACD608731_ |
| 0.949646 | 0.98946  | 0.917511 | 0.952206 | gj_188522932.gb_ACD608771_ |
| 0.27508  | 0.76959  | 0.324098 | 0.456256 | gj_188522933.gb_ACD608781_ |
| 0.166034 | 0.94164  | 0.213829 | 0.440501 | gj_188522934.gb_ACD608791_ |
| 0.955212 | 0.995739 | 0.894353 | 0.948435 | gj_188522937.gb_ACD608821_ |
| 0.380836 | 0.925739 | 0.470783 | 0.592453 | gj_188522938.gb_ACD608831_ |
| 0.760969 | 0.395799 | 0.772767 | 0.643178 | gj_188522939.gb_ACD608841_ |
| 0.072831 | 0.004496 | 0.104518 | 0.060615 | gj_188522940.gb_ACD608851_ |
| 0.813968 | 0.950358 | 0.921724 | 0.893535 | gj_188522941.gb_ACD608861_ |
| 0.090545 | 0.013844 | 0.13193  | 0.078773 | gj_188522948.gb_ACD608931_ |
| 0.128532 | 0.002421 | 0.150844 | 0.093932 | gj_188522949.gb_ACD608941_ |
| 0.103123 | 0.094833 | 0.094833 | 0.097596 | gj_188522950.gb_ACD608951_ |
| 0.09984  | 0.000724 | 0.156699 | 0.085754 | gj_188522951.gb_ACD608961_ |
| 0.264443 | 0.810306 | 0.135755 | 0.403501 | gj_188522953.gb_ACD608981_ |
| 0.085021 | 0.152    | 0.099571 | 0.112197 | gj_188522955.gb_ACD609001_ |
| 0.258927 | 0.514246 | 0.289051 | 0.353408 | gj_188522956.gb_ACD609011_ |
| 0.130222 | 0.1603   | 0.115067 | 0.135196 | gj_188522960.gb_ACD609051_ |
| 0.145542 | 0.125868 | 0.199567 | 0.156992 | gj_188522962.gb_ACD609071_ |
| 0.140397 | 0.039468 | 0.147041 | 0.108969 | gj_188522                  |



|                            |       |    |       |    |       |    |       |       |   |      |              |
|----------------------------|-------|----|-------|----|-------|----|-------|-------|---|------|--------------|
| gi_188522868_gb_ACD60813.1 | 0.311 | 35 | 0.211 | 35 | 0.51  | 1  | 0.205 | 0.208 | N | 0.57 | SignalP-noTM |
| gi_188522869_gb_ACD60814.1 | 0.609 | 23 | 0.678 | 23 | 0.925 | 19 | 0.802 | 0.736 | Y | 0.57 | SignalP-noTM |
| gi_188522880_gb_ACD60825.1 | 0.107 | 23 | 0.156 | 11 | 0.366 | 2  | 0.225 | 0.188 | N | 0.57 | SignalP-noTM |
| gi_188522884_gb_ACD60829.1 | 0.128 | 56 | 0.146 | 56 | 0.206 | 46 | 0.147 | 0.147 | N | 0.57 | SignalP-noTM |
| gi_188522886_gb_ACD60831.1 | 0.182 | 51 | 0.135 | 28 | 0.2   | 24 | 0.154 | 0.142 | N | 0.51 | SignalP-TM   |
| gi_188522887_gb_ACD60832.1 | 0.134 | 29 | 0.135 | 29 | 0.189 | 1  | 0.143 | 0.139 | N | 0.57 | SignalP-noTM |
| gi_188522891_gb_ACD60836.1 | 0.105 | 22 | 0.117 | 47 | 0.186 | 45 | 0.079 | 0.103 | N | 0.51 | SignalP-TM   |
| gi_188522892_gb_ACD60837.1 | 0.149 | 19 | 0.128 | 11 | 0.301 | 1  | 0.144 | 0.136 | N | 0.57 | SignalP-noTM |
| gi_188522894_gb_ACD60839.1 | 0.152 | 50 | 0.188 | 12 | 0.45  | 2  | 0.364 | 0.253 | N | 0.51 | SignalP-TM   |
| gi_188522901_gb_ACD60846.1 | 0.466 | 60 | 0.534 | 60 | 0.915 | 43 | 0.449 | 0.494 | N | 0.57 | SignalP-noTM |
| gi_188522902_gb_ACD60847.1 | 0.104 | 36 | 0.115 | 14 | 0.16  | 10 | 0.137 | 0.125 | N | 0.57 | SignalP-noTM |
| gi_188522903_gb_ACD60848.1 | 0.128 | 21 | 0.109 | 21 | 0.135 | 9  | 0.1   | 0.105 | N | 0.57 | SignalP-noTM |
| gi_188522904_gb_ACD60849.1 | 0.111 | 26 | 0.134 | 12 | 0.226 | 9  | 0.185 | 0.158 | N | 0.57 | SignalP-noTM |
| gi_188522906_gb_ACD60851.1 | 0.156 | 42 | 0.146 | 42 | 0.219 | 19 | 0.143 | 0.145 | N | 0.57 | SignalP-noTM |
| gi_188522908_gb_ACD60853.1 | 0.122 | 43 | 0.111 | 43 | 0.141 | 1  | 0.098 | 0.105 | N | 0.57 | SignalP-noTM |
| gi_188522909_gb_ACD60854.1 | 0.118 | 65 | 0.179 | 11 | 0.418 | 3  | 0.323 | 0.247 | N | 0.57 | SignalP-noTM |
| gi_188522910_gb_ACD60855.1 | 0.169 | 37 | 0.172 | 35 | 0.366 | 34 | 0.18  | 0.176 | N | 0.57 | SignalP-noTM |
| gi_188522911_gb_ACD60856.1 | 0.103 | 25 | 0.102 | 62 | 0.139 | 2  | 0.096 | 0.099 | N | 0.57 | SignalP-noTM |
| gi_188522913_gb_ACD60858.1 | 0.158 | 20 | 0.115 | 42 | 0.165 | 25 | 0.1   | 0.108 | N | 0.57 | SignalP-noTM |
| gi_188522914_gb_ACD60859.1 | 0.178 | 39 | 0.144 | 23 | 0.253 | 19 | 0.18  | 0.16  | N | 0.57 | SignalP-noTM |
| gi_188522919_gb_ACD60864.1 | 0.111 | 9  | 0.106 | 68 | 0.124 | 62 | 0.09  | 0.098 | N | 0.57 | SignalP-noTM |
| gi_188522922_gb_ACD60867.1 | 0.125 | 37 | 0.102 | 15 | 0.12  | 5  | 0.102 | 0.102 | N | 0.57 | SignalP-noTM |
| gi_188522925_gb_ACD60870.1 | 0.154 | 36 | 0.12  | 47 | 0.141 | 46 | 0.073 | 0.103 | N | 0.51 | SignalP-TM   |
| gi_188522926_gb_ACD60871.1 | 0.164 | 26 | 0.174 | 26 | 0.375 | 2  | 0.235 | 0.202 | N | 0.57 | SignalP-noTM |
| gi_188522927_gb_ACD60872.1 | 0.17  | 25 | 0.196 | 25 | 0.451 | 21 | 0.218 | 0.204 | N | 0.51 | SignalP-TM   |
| gi_188522928_gb_ACD60873.1 | 0.155 | 50 | 0.111 | 50 | 0.112 | 2  | 0.085 | 0.099 | N | 0.57 | SignalP-noTM |
| gi_188522932_gb_ACD60877.1 | 0.599 | 14 | 0.58  | 14 | 0.848 | 11 | 0.557 | 0.569 | N | 0.57 | SignalP-noTM |
| gi_188522933_gb_ACD60878.1 | 0.156 | 42 | 0.146 | 42 | 0.234 | 19 | 0.152 | 0.149 | N | 0.57 | SignalP-noTM |
| gi_188522934_gb_ACD60879.1 | 0.333 | 19 | 0.469 | 19 | 0.948 | 9  | 0.694 | 0.575 | Y | 0.57 | SignalP-noTM |
| gi_188522937_gb_ACD60882.1 | 0.667 | 20 | 0.768 | 20 | 0.944 | 19 | 0.873 | 0.817 | Y | 0.57 | SignalP-noTM |
| gi_188522938_gb_ACD60883.1 | 0.29  | 40 | 0.219 | 40 | 0.338 | 39 | 0.125 | 0.174 | N | 0.57 | SignalP-noTM |
| gi_188522939_gb_ACD60884.1 | 0.144 | 33 | 0.186 | 41 | 0.548 | 32 | 0.178 | 0.183 | N | 0.57 | SignalP-noTM |
| gi_188522940_gb_ACD60885.1 | 0.109 | 4  | 0.111 | 56 | 0.156 | 1  | 0.106 | 0.109 | N | 0.57 | SignalP-noTM |
| gi_188522941_gb_ACD60886.1 | 0.576 | 27 | 0.549 | 27 | 0.737 | 17 | 0.538 | 0.544 | N | 0.57 | SignalP-noTM |
| gi_188522948_gb_ACD60893.1 | 0.128 | 20 | 0.108 | 20 | 0.139 | 19 | 0.085 | 0.098 | N | 0.57 | SignalP-noTM |
| gi_188522949_gb_ACD60894.1 | 0.248 | 28 | 0.129 | 28 | 0.149 | 2  | 0.081 | 0.106 | N | 0.57 | SignalP-noTM |
| gi_188522950_gb_ACD60895.1 | 0.108 | 18 | 0.111 | 60 | 0.137 | 49 | 0.097 | 0.104 | N | 0.57 | SignalP-noTM |
| gi_188522951_gb_ACD60896.1 | 0.117 | 42 | 0.105 | 44 | 0.125 | 3  | 0.095 | 0.1   | N | 0.57 | SignalP-noTM |
| gi_188522953_gb_ACD60898.1 | 0.101 | 49 | 0.117 | 31 | 0.165 | 9  | 0.127 | 0.122 | N | 0.57 | SignalP-noTM |
| gi_188522955_gb_ACD60900.1 | 0.115 | 25 | 0.115 | 43 | 0.146 | 34 | 0.079 | 0.102 | N | 0.51 | SignalP-TM   |
| gi_188522956_gb_ACD60901.1 | 0.606 | 26 | 0.751 | 26 | 0.97  | 15 | 0.919 | 0.83  | Y | 0.57 | SignalP-noTM |
| gi_188522960_gb_ACD60905.1 | 0.13  | 29 | 0.117 | 11 | 0.171 | 4  | 0.143 | 0.127 | N | 0.51 | SignalP-TM   |
| gi_188522962_gb_ACD60907.1 | 0.593 | 28 | 0.23  | 28 | 0.15  | 24 | 0.096 | 0.181 | N | 0.51 | SignalP-TM   |
| gi_188522963_gb_ACD60908.1 | 0.141 | 21 | 0.152 | 21 | 0.327 | 1  | 0.181 | 0.166 | N | 0.57 | SignalP-noTM |
| gi_188522964_gb_ACD60909.1 | 0.158 | 33 | 0.153 | 12 | 0.242 | 5  | 0.171 | 0.161 | N | 0.57 | SignalP-noTM |
| gi_188522965_gb_ACD60910.1 | 0.134 | 33 | 0.135 | 21 | 0.226 | 19 | 0.137 | 0.136 | N | 0.57 | SignalP-noTM |
| gi_188522966_gb_ACD60911.1 | 0.119 | 61 | 0.121 | 40 | 0.172 | 36 | 0.123 | 0.122 | N | 0.57 | SignalP-noTM |
| gi_188522969_gb_ACD60914.1 | 0.53  | 21 | 0.724 | 21 | 0.993 | 10 | 0.976 | 0.842 | Y | 0.57 | SignalP-noTM |
| gi_188522970_gb_ACD60915.1 | 0.104 | 41 | 0.102 | 41 | 0.115 | 39 | 0.087 | 0.095 | N | 0.57 | SignalP-noTM |
| gi_188522971_gb_ACD60916.1 | 0.147 | 22 | 0.106 | 11 | 0.184 | 1  | 0.104 | 0.105 | N | 0.51 | SignalP-TM   |
| gi_188522972_gb_ACD60917.1 | 0.169 | 19 | 0.198 | 19 | 0.292 | 18 | 0.224 | 0.208 | N | 0.51 | SignalP-TM   |
| gi_188522973_gb_ACD60918.1 | 0.114 | 69 | 0.111 | 70 | 0.148 | 68 | 0.089 | 0.103 | N | 0.51 | SignalP-TM   |
| gi_188522974_gb_ACD60919.1 | 0.104 | 32 | 0.102 | 66 | 0.131 | 31 | 0.089 | 0.096 | N | 0.57 | SignalP-noTM |
| gi_188522975_gb_ACD60920.1 | 0.111 | 43 | 0.101 | 20 | 0.116 | 9  | 0.086 | 0.094 | N | 0.57 | SignalP-noTM |
| gi_188522976_gb_ACD60921.1 | 0.105 | 36 | 0.107 | 11 | 0.132 | 1  | 0.117 | 0.112 | N | 0.57 | SignalP-noTM |
| gi_188522980_gb_ACD60925.1 | 0.105 | 45 | 0.105 | 51 | 0.184 | 42 | 0.087 | 0.096 | N | 0.57 | SignalP-noTM |
| gi_188522981_gb_ACD60926.1 | 0.179 | 22 | 0.166 | 22 | 0.231 | 20 | 0.168 | 0.167 | N | 0.57 | SignalP-noTM |
| gi_188522983_gb_ACD60928.1 | 0.112 | 22 | 0.143 | 13 | 0.257 | 9  | 0.207 | 0.173 | N | 0.57 | SignalP-noTM |
| gi_188522984_gb_ACD60929.1 | 0.199 | 35 | 0.166 | 35 | 0.21  | 33 | 0.134 | 0.151 | N | 0.57 | SignalP-noTM |
| gi_188522985_gb_ACD60930.1 | 0.293 | 13 | 0.493 | 13 | 0.895 | 9  | 0.828 | 0.651 | Y | 0.57 | SignalP-noTM |
| gi_188522986_gb_ACD60931.1 | 0.141 | 35 | 0.137 | 12 | 0.208 | 1  | 0.173 | 0.154 | N | 0.57 | SignalP-noTM |
| gi_188522987_gb_ACD60932.1 | 0.27  | 32 | 0.172 | 32 | 0.163 | 30 | 0.105 | 0.14  | N | 0.57 | SignalP-noTM |
| gi_188522988_gb_ACD60933.1 | 0.117 | 40 | 0.151 | 40 | 0.344 | 33 | 0.182 | 0.166 | N | 0.57 | SignalP-noTM |
| gi_188522989_gb_ACD60934.1 | 0.127 | 32 | 0.191 | 41 | 0.431 | 39 | 0.209 | 0.2   | N | 0.57 | SignalP-noTM |
| gi_188522990_gb_ACD60935.1 | 0.105 | 45 | 0.105 | 51 | 0.184 | 42 | 0.087 | 0.096 | N | 0.57 | SignalP-noTM |
| gi_188522991_gb_ACD60936.1 | 0.161 | 25 | 0.27  | 11 | 0.671 | 9  | 0.533 | 0.393 | N | 0.57 | SignalP-noTM |
| gi_188522992_gb_ACD60937.1 | 0.375 | 27 | 0.591 | 27 | 0.977 | 23 | 0.927 | 0.749 | Y | 0.57 | SignalP-noTM |
| gi_188522995_gb_ACD60940.1 | 0.176 | 21 | 0.174 | 21 | 0.229 | 1  | 0.175 | 0.174 | N | 0.57 | SignalP-noTM |
| gi_188522997_gb_ACD60942.1 | 0.128 | 19 | 0.162 | 11 | 0.434 | 1  | 0.252 | 0.204 | N | 0.57 | SignalP-noTM |
| gi_188522999_gb_ACD60944.1 | 0.103 | 35 | 0.101 | 40 | 0.118 | 33 | 0.079 | 0.091 | N | 0.57 | SignalP-noTM |
| gi_18853000_gb_ACD60945.1  | 0.199 | 43 | 0.136 | 43 | 0.177 | 1  | 0.101 | 0.11  | N | 0.57 | SignalP-noTM |
| gi_18853001_gb_ACD60946.1  | 0.101 | 26 | 0.103 | 21 | 0.115 | 14 | 0.101 | 0.102 | N | 0.57 | SignalP-noTM |
| gi_18853002_gb_ACD60947.1  | 0.124 | 29 | 0.187 | 15 | 0.432 | 11 | 0.343 | 0.26  | N | 0.57 | SignalP-noTM |
| gi_18853003_gb_ACD60948.1  | 0.176 | 19 | 0.202 | 19 | 0.383 | 1  | 0.258 | 0.229 | N | 0.57 | SignalP-noTM |
| gi_18853005_gb_ACD60950.1  | 0.198 | 24 | 0.383 | 24 | 0.919 | 1  | 0.804 | 0.581 | Y | 0.57 | SignalP-noTM |
| gi_18853006_gb_ACD60951.1  | 0.124 | 21 | 0.157 | 21 | 0.306 | 19 | 0.191 | 0.173 | N | 0.57 | SignalP-noTM |
| gi_18853007_gb_ACD60952.1  | 0.284 | 61 | 0.182 | 61 | 0.21  | 52 | 0.109 | 0.148 | N | 0.57 | SignalP-noTM |
| gi_18853008_gb_ACD60953.1  | 0.426 | 29 | 0.317 | 29 | 0.472 | 8  | 0.333 | 0.323 | N | 0.51 | SignalP-TM   |

|          |          |          |          |                            |
|----------|----------|----------|----------|----------------------------|
| 0.172359 | 0.12196  | 0.142583 | 0.145634 | gi_188523029_gb_ACD60974.1 |
| 0.180643 | 0.033278 | 0.246197 | 0.153373 | gi_188523034_gb_ACD60979.1 |
| 0.949789 | 0.999432 | 0.904132 | 0.951118 | gi_188523035_gb_ACD60980.1 |
| 0.921072 | 0.982102 | 0.906192 | 0.936455 | gi_188523036_gb_ACD60981.1 |
| 0.522485 | 0.818468 | 0.697833 | 0.679595 | gi_188523037_gb_ACD60982.1 |
| 0.223047 | 0.041927 | 0.215853 | 0.160276 | gi_188523038_gb_ACD60983.1 |
| 0.167702 | 0.120999 | 0.181532 | 0.156744 | gi_188523039_gb_ACD60984.1 |
| 0.095091 | 0.022776 | 0.162329 | 0.093399 | gi_188523040_gb_ACD60985.1 |
| 0.140397 | 0.040621 | 0.206361 | 0.129126 | gi_188523041_gb_ACD60986.1 |
| 0.148932 | 0.669959 | 0.176245 | 0.331712 | gi_188523042_gb_ACD60987.1 |
| 0.826353 | 0.989949 | 0.753803 | 0.856702 | gi_188523043_gb_ACD60988.1 |
| 0.146665 | 0.129544 | 0.17023  | 0.148813 | gi_188523044_gb_ACD60989.1 |
| 0.119729 | 0.054992 | 0.112346 | 0.095689 | gi_188523046_gb_ACD60991.1 |
| 0.945319 | 0.992903 | 0.926559 | 0.954927 | gi_188523047_gb_ACD60992.1 |
| 0.933578 | 0.999843 | 0.864245 | 0.932555 | gi_188523048_gb_ACD60993.1 |
| 0.958194 | 0.999976 | 0.932074 | 0.963415 | gi_188523050_gb_ACD60995.1 |
| 0.167702 | 0.048661 | 0.220974 | 0.145779 | gi_188523051_gb_ACD60996.1 |
| 0.923012 | 0.999642 | 0.848772 | 0.923809 | gi_528897497_gb_AGS47856.1 |
| 0.943747 | 0.995739 | 0.899348 | 0.946278 | gi_188523053_gb_ACD60998.1 |
| 0.398672 | 0.237941 | 0.634599 | 0.423737 | gi_188523054_gb_ACD60999.1 |
| 0.188773 | 0.03299  | 0.202943 | 0.141569 | gi_188523055_gb_ACD61000.1 |
| 0.247871 | 0.228818 | 0.201491 | 0.22606  | gi_188523057_gb_ACD61002.1 |
| 0.178433 | 0.085255 | 0.200047 | 0.154578 | gi_188523058_gb_ACD61003.1 |
| 0.157493 | 0.235772 | 0.156303 | 0.183189 | gi_188523059_gb_ACD61004.1 |
| 0.100652 | 0.040272 | 0.113548 | 0.084824 | gi_188523069_gb_ACD61014.1 |
| 0.443986 | 0.515745 | 0.547111 | 0.50228  | gi_188523072_gb_ACD61017.1 |
| 0.905424 | 0.894919 | 0.9015   | 0.900614 | gi_188523075_gb_ACD61020.1 |
| 0.230942 | 0.124553 | 0.147795 | 0.167763 | gi_188523076_gb_ACD61021.1 |
| 0.102018 | 0.027266 | 0.115986 | 0.081877 | gi_188523077_gb_ACD61022.1 |
| 0.073441 | 0.024578 | 0.080468 | 0.059496 | gi_188523078_gb_ACD61023.1 |
| 0.941969 | 0.10147  | 0.896321 | 0.646587 | gi_188523079_gb_ACD61024.1 |
| 0.15907  | 0.053911 | 0.182873 | 0.130897 | gi_18852308                |

|                           |       |    |       |    |       |    |       |       |   |      |              |
|---------------------------|-------|----|-------|----|-------|----|-------|-------|---|------|--------------|
| gj_188523009_gb_ACD609541 | 0.147 | 39 | 0.123 | 26 | 0.163 | 1  | 0.107 | 0.116 | N | 0.57 | SignalP-noTM |
| gj_188523010_gb_ACD609551 | 0.131 | 53 | 0.111 | 53 | 0.119 | 28 | 0.086 | 0.099 | N | 0.57 | SignalP-noTM |
| gj_188523011_gb_ACD609561 | 0.119 | 47 | 0.112 | 66 | 0.135 | 57 | 0.101 | 0.107 | N | 0.57 | SignalP-noTM |
| gj_188523012_gb_ACD609571 | 0.19  | 44 | 0.203 | 25 | 0.361 | 21 | 0.223 | 0.212 | N | 0.57 | SignalP-noTM |
| gj_188523013_gb_ACD609581 | 0.141 | 23 | 0.125 | 23 | 0.148 | 21 | 0.115 | 0.12  | N | 0.57 | SignalP-noTM |
| gj_188523014_gb_ACD609591 | 0.293 | 22 | 0.188 | 22 | 0.208 | 19 | 0.113 | 0.153 | N | 0.57 | SignalP-noTM |
| gj_188523015_gb_ACD609601 | 0.117 | 23 | 0.126 | 12 | 0.217 | 1  | 0.155 | 0.14  | N | 0.57 | SignalP-noTM |
| gj_188523016_gb_ACD609611 | 0.102 | 32 | 0.163 | 11 | 0.367 | 2  | 0.268 | 0.212 | N | 0.57 | SignalP-noTM |
| gj_188523017_gb_ACD609621 | 0.105 | 26 | 0.157 | 12 | 0.356 | 5  | 0.25  | 0.201 | N | 0.57 | SignalP-noTM |
| gj_188523019_gb_ACD609641 | 0.144 | 42 | 0.143 | 42 | 0.229 | 35 | 0.144 | 0.144 | N | 0.57 | SignalP-noTM |
| gj_188523027_gb_ACD609721 | 0.114 | 60 | 0.113 | 60 | 0.161 | 5  | 0.096 | 0.105 | N | 0.57 | SignalP-noTM |
| gj_188523028_gb_ACD609731 | 0.112 | 36 | 0.136 | 12 | 0.255 | 3  | 0.184 | 0.158 | N | 0.57 | SignalP-noTM |
| gj_188523029_gb_ACD609741 | 0.149 | 22 | 0.175 | 22 | 0.34  | 5  | 0.234 | 0.203 | N | 0.57 | SignalP-noTM |
| gj_188523034_gb_ACD609791 | 0.134 | 45 | 0.117 | 11 | 0.18  | 1  | 0.135 | 0.126 | N | 0.57 | SignalP-noTM |
| gj_188523035_gb_ACD609801 | 0.137 | 22 | 0.303 | 22 | 0.923 | 1  | 0.732 | 0.505 | N | 0.57 | SignalP-noTM |
| gj_188523036_gb_ACD609811 | 0.304 | 26 | 0.248 | 26 | 0.373 | 21 | 0.19  | 0.226 | N | 0.51 | SignalP-TM   |
| gj_188523037_gb_ACD609821 | 0.145 | 27 | 0.172 | 27 | 0.292 | 21 | 0.173 | 0.172 | N | 0.51 | SignalP-TM   |
| gj_188523038_gb_ACD609831 | 0.136 | 33 | 0.136 | 33 | 0.188 | 2  | 0.146 | 0.141 | N | 0.57 | SignalP-noTM |
| gj_188523039_gb_ACD609841 | 0.251 | 28 | 0.243 | 28 | 0.422 | 3  | 0.253 | 0.247 | N | 0.51 | SignalP-TM   |
| gj_188523040_gb_ACD609851 | 0.204 | 29 | 0.183 | 38 | 0.296 | 34 | 0.17  | 0.179 | N | 0.51 | SignalP-TM   |
| gj_188523041_gb_ACD609861 | 0.397 | 40 | 0.393 | 40 | 0.706 | 32 | 0.282 | 0.352 | N | 0.51 | SignalP-TM   |
| gj_188523042_gb_ACD609871 | 0.17  | 17 | 0.304 | 12 | 0.791 | 2  | 0.62  | 0.421 | N | 0.51 | SignalP-TM   |
| gj_188523043_gb_ACD609881 | 0.111 | 44 | 0.161 | 11 | 0.367 | 4  | 0.262 | 0.198 | N | 0.51 | SignalP-TM   |
| gj_188523044_gb_ACD609891 | 0.134 | 23 | 0.104 | 49 | 0.129 | 42 | 0.085 | 0.095 | N | 0.57 | SignalP-noTM |
| gj_188523046_gb_ACD609911 | 0.199 | 64 | 0.14  | 64 | 0.115 | 24 | 0.096 | 0.119 | N | 0.57 | SignalP-noTM |
| gj_188523047_gb_ACD609921 | 0.117 | 25 | 0.196 | 12 | 0.596 | 10 | 0.376 | 0.281 | N | 0.57 | SignalP-noTM |
| gj_188523048_gb_ACD609931 | 0.129 | 40 | 0.133 | 40 | 0.181 | 5  | 0.131 | 0.133 | N | 0.57 | SignalP-noTM |
| gj_528897497_gb_AGS478561 | 0.472 | 28 | 0.653 | 28 | 0.969 | 21 | 0.846 | 0.743 | Y | 0.57 | SignalP-noTM |
| gj_188523050_gb_ACD609951 | 0.403 | 67 | 0.268 | 67 | 0.509 | 12 | 0.233 | 0.255 | N | 0.51 | SignalP-TM   |
| gj_188523051_gb_ACD609961 | 0.194 | 26 | 0.148 | 26 | 0.267 | 6  | 0.135 | 0.142 | N | 0.57 | SignalP-noTM |
| gj_188523053_gb_ACD609981 | 0.842 | 20 | 0.898 | 20 | 0.972 | 18 | 0.949 | 0.922 | Y | 0.57 | SignalP-noTM |
| gj_188523054_gb_ACD609991 | 0.251 | 26 | 0.236 | 26 | 0.405 | 9  | 0.276 | 0.255 | N | 0.57 | SignalP-noTM |
| gj_188523055_gb_ACD610001 | 0.213 | 23 | 0.226 | 23 | 0.622 | 1  | 0.308 | 0.265 | N | 0.57 | SignalP-noTM |
| gj_188523057_gb_ACD610021 | 0.21  | 46 | 0.192 | 46 | 0.394 | 16 | 0.226 | 0.204 | N | 0.51 | SignalP-TM   |
| gj_188523058_gb_ACD610031 | 0.331 | 38 | 0.297 | 38 | 0.374 | 35 | 0.184 | 0.255 | N | 0.51 | SignalP-TM   |
| gj_188523059_gb_ACD610041 | 0.117 | 34 | 0.1   | 11 | 0.13  | 1  | 0.1   | 0.1   | N | 0.51 | SignalP-TM   |
| gj_188523069_gb_ACD610141 | 0.106 | 58 | 0.105 | 58 | 0.139 | 6  | 0.103 | 0.104 | N | 0.57 | SignalP-noTM |
| gj_188523072_gb_ACD610171 | 0.255 | 15 | 0.342 | 15 | 0.801 | 13 | 0.444 | 0.39  | N | 0.57 | SignalP-noTM |
| gj_188523075_gb_ACD610201 | 0.157 | 24 | 0.156 | 24 | 0.199 | 1  | 0.157 | 0.157 | N | 0.57 | SignalP-noTM |
| gj_188523076_gb_ACD610211 | 0.143 | 51 | 0.148 | 23 | 0.252 | 4  | 0.203 | 0.174 | N | 0.57 | SignalP-noTM |
| gj_188523077_gb_ACD610221 | 0.137 | 25 | 0.197 | 12 | 0.536 | 3  | 0.395 | 0.29  | N | 0.57 | SignalP-noTM |
| gj_188523078_gb_ACD610231 | 0.108 | 69 | 0.111 | 33 | 0.19  | 1  | 0.107 | 0.109 | N | 0.57 | SignalP-noTM |
| gj_188523079_gb_ACD610241 | 0.129 | 21 | 0.107 | 32 | 0.134 | 1  | 0.095 | 0.102 | N | 0.57 | SignalP-noTM |
| gj_188523080_gb_ACD610251 | 0.189 | 44 | 0.215 | 34 | 0.444 | 3  | 0.337 | 0.26  | N | 0.51 | SignalP-TM   |
| gj_188523084_gb_ACD610291 | 0.168 | 17 | 0.248 | 17 | 0.548 | 12 | 0.37  | 0.305 | N | 0.57 | SignalP-noTM |
| gj_188523090_gb_ACD610351 | 0.17  | 36 | 0.124 | 25 | 0.136 | 22 | 0.105 | 0.115 | N | 0.57 | SignalP-noTM |
| gj_188523093_gb_ACD610381 | 0.129 | 36 | 0.129 | 36 | 0.208 | 31 | 0.118 | 0.124 | N | 0.57 | SignalP-noTM |
| gj_188523094_gb_ACD610391 | 0.154 | 49 | 0.131 | 49 | 0.197 | 47 | 0.096 | 0.115 | N | 0.57 | SignalP-noTM |
| gj_188523097_gb_ACD610421 | 0.165 | 29 | 0.15  | 29 | 0.248 | 1  | 0.158 | 0.154 | N | 0.57 | SignalP-noTM |
| gj_188523098_gb_ACD610431 | 0.128 | 21 | 0.12  | 21 | 0.211 | 1  | 0.118 | 0.119 | N | 0.57 | SignalP-noTM |
| gj_188523099_gb_ACD610441 | 0.1   | 22 | 0.107 | 11 | 0.164 | 1  | 0.114 | 0.11  | N | 0.51 | SignalP-TM   |
| gj_188523100_gb_ACD610451 | 0.134 | 24 | 0.152 | 21 | 0.277 | 1  | 0.198 | 0.173 | N | 0.57 | SignalP-noTM |
| gj_188523105_gb_ACD610501 | 0.238 | 33 | 0.159 | 33 | 0.17  | 32 | 0.093 | 0.128 | N | 0.57 | SignalP-noTM |
| gj_188523107_gb_ACD610521 | 0.104 | 27 | 0.122 | 11 | 0.2   | 5  | 0.158 | 0.135 | N | 0.51 | SignalP-TM   |
| gj_188523108_gb_ACD610531 | 0.133 | 22 | 0.158 | 22 | 0.292 | 11 | 0.194 | 0.175 | N | 0.57 | SignalP-noTM |
| gj_188523109_gb_ACD610541 | 0.222 | 34 | 0.208 | 34 | 0.258 | 27 | 0.149 | 0.186 | N | 0.51 | SignalP-TM   |
| gj_188523110_gb_ACD610551 | 0.141 | 25 | 0.18  | 25 | 0.349 | 13 | 0.23  | 0.203 | N | 0.57 | SignalP-noTM |
| gj_188523111_gb_ACD610561 | 0.117 | 26 | 0.121 | 11 | 0.19  | 1  | 0.14  | 0.13  | N | 0.57 | SignalP-noTM |
| gj_188523112_gb_ACD610571 | 0.112 | 18 | 0.122 | 18 | 0.181 | 8  | 0.129 | 0.125 | N | 0.57 | SignalP-noTM |
| gj_188523113_gb_ACD610581 | 0.214 | 25 | 0.23  | 25 | 0.351 | 19 | 0.219 | 0.225 | N | 0.57 | SignalP-noTM |
| gj_188523115_gb_ACD610601 | 0.109 | 27 | 0.158 | 11 | 0.319 | 2  | 0.258 | 0.205 | N | 0.57 | SignalP-noTM |
| gj_188523116_gb_ACD610611 | 0.163 | 49 | 0.147 | 11 | 0.276 | 4  | 0.217 | 0.18  | N | 0.57 | SignalP-noTM |
| gj_188523117_gb_ACD610621 | 0.108 | 34 | 0.207 | 18 | 0.478 | 11 | 0.412 | 0.304 | N | 0.57 | SignalP-noTM |
| gj_188523118_gb_ACD610631 | 0.46  | 28 | 0.232 | 28 | 0.223 | 2  | 0.119 | 0.179 | N | 0.57 | SignalP-noTM |
| gj_188523120_gb_ACD610651 | 0.102 | 60 | 0.101 | 60 | 0.122 | 14 | 0.09  | 0.096 | N | 0.57 | SignalP-noTM |
| gj_188523121_gb_ACD610661 | 0.7   | 24 | 0.794 | 24 | 0.954 | 21 | 0.906 | 0.846 | Y | 0.57 | SignalP-noTM |
| gj_188523122_gb_ACD610671 | 0.653 | 21 | 0.774 | 21 | 0.964 | 18 | 0.89  | 0.829 | Y | 0.57 | SignalP-noTM |
| gj_188523124_gb_ACD610691 | 0.152 | 30 | 0.149 | 30 | 0.222 | 27 | 0.151 | 0.15  | N | 0.57 | SignalP-noTM |
| gj_188523125_gb_ACD610701 | 0.119 | 31 | 0.114 | 31 | 0.159 | 39 | 0.102 | 0.109 | N | 0.57 | SignalP-noTM |
| gj_188523127_gb_ACD610721 | 0.12  | 32 | 0.098 | 55 | 0.11  | 5  | 0.082 | 0.091 | N | 0.57 | SignalP-noTM |
| gj_188523130_gb_ACD610751 | 0.139 | 36 | 0.157 | 36 | 0.243 | 8  | 0.173 | 0.164 | N | 0.57 | SignalP-noTM |
| gj_188523133_gb_ACD610781 | 0.204 | 26 | 0.152 | 26 | 0.162 | 15 | 0.117 | 0.135 | N | 0.57 | SignalP-noTM |
| gj_188523134_gb_ACD610791 | 0.279 | 53 | 0.176 | 53 | 0.205 | 3  | 0.119 | 0.149 | N | 0.57 | SignalP-noTM |
| gj_188523137_gb_ACD610821 | 0.147 | 26 | 0.128 | 26 | 0.177 | 24 | 0.115 | 0.122 | N | 0.57 | SignalP-noTM |
| gj_188523138_gb_ACD610831 | 0.131 | 40 | 0.102 | 40 | 0.112 | 1  | 0.074 | 0.089 | N | 0.57 | SignalP-noTM |
| gj_188523139_gb_ACD610841 | 0.118 | 23 | 0.105 | 55 | 0.134 | 48 | 0.092 | 0.099 | N | 0.57 | SignalP-noTM |
| gj_188523145_gb_ACD610901 | 0.111 | 9  | 0.106 | 68 | 0.124 | 62 | 0.09  | 0.098 | N | 0.57 | SignalP-noTM |
| gj_188523146_gb_ACD610911 | 0.124 | 20 | 0.132 | 25 | 0.178 | 34 | 0.125 | 0.129 | N | 0.57 | SignalP-noTM |

|          |          |          |          |                           |
|----------|----------|----------|----------|---------------------------|
| 0.113247 | 0.039925 | 0.155119 | 0.102764 | gj_188523165_gb_ACD611101 |
| 0.105364 | 0.002421 | 0.178873 | 0.095553 | gj_188523166_gb_ACD611111 |
| 0.153553 | 0.079147 | 0.321475 | 0.184725 | gj_188523167_gb_ACD611121 |
| 0.089562 | 0.056094 | 0.201009 | 0.115555 | gj_188523168_gb_ACD611131 |
| 0.042047 | 0.443246 | 0.12196  | 0.202418 | gj_188523169_gb_ACD611141 |
| 0.157493 | 0.16645  | 0.246754 | 0.190232 | gj_188523170_gb_ACD611151 |
| 0.248431 | 0.953113 | 0.283534 | 0.495026 | gj_188523172_gb_ACD611171 |
| 0.289051 | 0.351603 | 0.263278 | 0.301311 | gj_188523173_gb_ACD611181 |
| 0.873471 | 0.390074 | 0.852205 | 0.70525  | gj_188523174_gb_ACD611191 |
| 0.427759 | 0.991886 | 0.682438 | 0.700694 | gj_188523260_gb_ACD612051 |
| 0.94745  | 0.993775 | 0.905937 | 0.949054 | gj_188523267_gb_ACD612121 |
| 0.536684 | 0.07024  | 0.653849 | 0.420258 | gj_188523268_gb_ACD612131 |
| 0.95879  | 0.983999 | 0.946242 | 0.96301  | gj_188523269_gb_ACD612141 |
| 0.326073 | 0.983714 | 0.199089 | 0.502959 | gj_188523271_gb_ACD612161 |
| 0.054064 | 0.018487 | 0.126861 | 0.066471 | gj_188523275_gb_ACD612201 |
| 0.953113 | 0.999882 | 0.851827 | 0.934941 | gj_188523278_gb_ACD612231 |
| 0.932453 | 0.999868 | 0.926559 | 0.95296  | gj_188523280_gb_ACD612251 |
| 0.169384 | 0.540412 | 0.097969 | 0.269255 | gj_188523281_gb_ACD612261 |
| 0.238855 | 0.359854 | 0.159866 | 0.252202 | gj_188523282_gb_ACD612271 |
| 0.151614 | 0.378011 | 0.136461 | 0.222029 | gj_188523290_gb_ACD612351 |
| 0.198611 | 0.344795 | 0.062444 | 0.20195  | gj_188523293_gb_ACD612381 |
| 0.833134 | 0.990969 | 0.890611 | 0.904905 | gj_188523295_gb_ACD612401 |
| 0.93738  | 0.999902 | 0.924492 | 0.953925 | gj_188523297_gb_ACD612421 |
| 0.958194 | 0.999937 | 0.91819  | 0.958774 | gj_188523299_gb_ACD612441 |
| 0.270912 | 0.854084 | 0.328054 | 0.48435  | gj_188523300_gb_ACD612451 |
| 0.84954  | 0.998865 | 0.831038 | 0.893148 | gj_188523301_gb_ACD612461 |
| 0.142583 | 0.585405 | 0.143687 | 0.290558 | gj_188523303_gb_ACD612481 |
| 0.230942 | 0.771711 | 0.156699 | 0.386451 | gj_188523304_gb_ACD612491 |
| 0.349554 | 0.038457 | 0.364705 | 0.250905 | gj_188523305_gb_ACD612501 |
| 0.144056 | 0.071625 | 0.178873 | 0.131518 | gj_188523306_gb_ACD612511 |
| 0.798991 | 0.63599  | 0.618456 | 0.684479 | gj_188523311_gb_ACD612561 |
| 0.176245 | 0.059861 | 0.219943 | 0.152016 | gj_188523315_gb_ACD612601 |
| 0.07835  | 0.05285  | 0.084556 | 0.071252 | gj_188523316_gb_ACD612611 |
| 0.942945 | 0.998482 | 0.904391 | 0.948606 | gj_188523317_gb_ACD612621 |
| 0.147418 | 0.283534 | 0.181087 | 0.204013 | gj_188523320_gb_ACD612651 |

|                            |       |    |       |    |       |    |       |       |   |      |              |
|----------------------------|-------|----|-------|----|-------|----|-------|-------|---|------|--------------|
| gj_188523147.gb_ACD610921_ | 0.247 | 12 | 0.302 | 12 | 0.659 | 9  | 0.377 | 0.337 | N | 0.57 | SignalP-noTM |
| gj_188523148.gb_ACD610931_ | 0.128 | 27 | 0.113 | 27 | 0.141 | 26 | 0.084 | 0.099 | N | 0.57 | SignalP-noTM |
| gj_188523149.gb_ACD610941_ | 0.112 | 19 | 0.106 | 11 | 0.151 | 9  | 0.114 | 0.11  | N | 0.57 | SignalP-noTM |
| gj_188523152.gb_ACD610971_ | 0.411 | 21 | 0.358 | 21 | 0.512 | 16 | 0.275 | 0.319 | N | 0.57 | SignalP-noTM |
| gj_188523154.gb_ACD610991_ | 0.112 | 50 | 0.144 | 11 | 0.288 | 3  | 0.215 | 0.177 | N | 0.57 | SignalP-noTM |
| gj_188523156.gb_ACD611011_ | 0.122 | 20 | 0.131 | 25 | 0.173 | 34 | 0.124 | 0.128 | N | 0.57 | SignalP-noTM |
| gj_188523158.gb_ACD611031_ | 0.225 | 57 | 0.18  | 30 | 0.402 | 28 | 0.203 | 0.191 | N | 0.57 | SignalP-noTM |
| gj_188523160.gb_ACD611051_ | 0.364 | 19 | 0.38  | 19 | 0.638 | 15 | 0.405 | 0.392 | N | 0.57 | SignalP-noTM |
| gj_188523161.gb_ACD611061_ | 0.129 | 36 | 0.11  | 36 | 0.177 | 10 | 0.092 | 0.101 | N | 0.57 | SignalP-noTM |
| gj_188523162.gb_ACD611071_ | 0.125 | 40 | 0.114 | 40 | 0.123 | 39 | 0.096 | 0.106 | N | 0.57 | SignalP-noTM |
| gj_188523163.gb_ACD611081_ | 0.106 | 29 | 0.109 | 29 | 0.126 | 20 | 0.104 | 0.107 | N | 0.57 | SignalP-noTM |
| gj_188523164.gb_ACD611091_ | 0.135 | 36 | 0.138 | 16 | 0.239 | 8  | 0.183 | 0.159 | N | 0.57 | SignalP-noTM |
| gj_188523165.gb_ACD611101_ | 0.107 | 48 | 0.105 | 53 | 0.165 | 1  | 0.099 | 0.102 | N | 0.57 | SignalP-noTM |
| gj_188523166.gb_ACD611111_ | 0.16  | 20 | 0.184 | 20 | 0.426 | 2  | 0.257 | 0.218 | N | 0.57 | SignalP-noTM |
| gj_188523167.gb_ACD611121_ | 0.166 | 33 | 0.145 | 33 | 0.204 | 1  | 0.13  | 0.139 | N | 0.51 | SignalP-TM   |
| gj_188523168.gb_ACD611131_ | 0.133 | 25 | 0.155 | 25 | 0.266 | 1  | 0.195 | 0.17  | N | 0.51 | SignalP-TM   |
| gj_188523169.gb_ACD611141_ | 0.143 | 45 | 0.156 | 45 | 0.204 | 36 | 0.104 | 0.137 | N | 0.51 | SignalP-TM   |
| gj_188523170.gb_ACD611151_ | 0.216 | 28 | 0.193 | 28 | 0.433 | 1  | 0.216 | 0.202 | N | 0.51 | SignalP-TM   |
| gj_188523172.gb_ACD611171_ | 0.127 | 31 | 0.118 | 31 | 0.131 | 16 | 0.105 | 0.112 | N | 0.57 | SignalP-noTM |
| gj_188523173.gb_ACD611181_ | 0.148 | 32 | 0.121 | 32 | 0.109 | 31 | 0.088 | 0.105 | N | 0.57 | SignalP-noTM |
| gj_188523174.gb_ACD611191_ | 0.587 | 22 | 0.656 | 22 | 0.878 | 1  | 0.767 | 0.708 | Y | 0.57 | SignalP-noTM |
| gj_188523260.gb_ACD612051_ | 0.101 | 22 | 0.101 | 11 | 0.138 | 1  | 0.099 | 0.1   | N | 0.57 | SignalP-noTM |
| gj_188523267.gb_ACD612121_ | 0.154 | 21 | 0.287 | 21 | 0.637 | 13 | 0.518 | 0.373 | N | 0.51 | SignalP-TM   |
| gj_188523268.gb_ACD612131_ | 0.19  | 21 | 0.184 | 26 | 0.343 | 25 | 0.185 | 0.184 | N | 0.57 | SignalP-noTM |
| gj_188523269.gb_ACD612141_ | 0.192 | 19 | 0.288 | 19 | 0.796 | 8  | 0.509 | 0.392 | N | 0.57 | SignalP-noTM |
| gj_188523271.gb_ACD612161_ | 0.127 | 28 | 0.127 | 66 | 0.181 | 59 | 0.103 | 0.118 | N | 0.51 | SignalP-TM   |
| gj_188523275.gb_ACD612201_ | 0.101 | 36 | 0.133 | 19 | 0.27  | 17 | 0.165 | 0.148 | N | 0.57 | SignalP-noTM |
| gj_188523278.gb_ACD612231_ | 0.114 | 26 | 0.185 | 11 | 0.454 | 5  | 0.351 | 0.263 | N | 0.57 | SignalP-noTM |
| gj_188523280.gb_ACD612251_ | 0.14  | 46 | 0.166 | 11 | 0.41  | 1  | 0.264 | 0.212 | N | 0.57 | SignalP-noTM |
| gj_188523281.gb_ACD612261_ | 0.126 | 44 | 0.11  | 22 | 0.411 | 20 | 0.119 | 0.114 | N | 0.57 | SignalP-noTM |
| gj_188523282.gb_ACD612271_ | 0.14  | 55 | 0.116 | 55 | 0.148 | 9  | 0.104 | 0.11  | N | 0.57 | SignalP-noTM |
| gj_188523290.gb_ACD612351_ | 0.115 | 21 | 0.11  | 38 | 0.149 | 36 | 0.095 | 0.103 | N | 0.57 | SignalP-noTM |
| gj_188523293.gb_ACD612381_ | 0.123 | 22 | 0.153 | 11 | 0.348 | 3  | 0.236 | 0.192 | N | 0.57 | SignalP-noTM |
| gj_188523295.gb_ACD612401_ | 0.141 | 27 | 0.109 | 48 | 0.107 | 43 | 0.077 | 0.094 | N | 0.57 | SignalP-noTM |
| gj_188523297.gb_ACD612421_ | 0.156 | 27 | 0.118 | 48 | 0.15  | 53 | 0.076 | 0.098 | N | 0.57 | SignalP-noTM |
| gj_188523299.gb_ACD612441_ | 0.241 | 19 | 0.364 | 19 | 0.732 | 9  | 0.547 | 0.45  | N | 0.57 | SignalP-noTM |
| gj_188523300.gb_ACD612451_ | 0.542 | 20 | 0.541 | 20 | 0.623 | 17 | 0.495 | 0.52  | N | 0.57 | SignalP-noTM |
| gj_188523301.gb_ACD612461_ | 0.134 | 58 | 0.133 | 11 | 0.219 | 1  | 0.167 | 0.149 | N | 0.57 | SignalP-noTM |
| gj_188523303.gb_ACD612481_ | 0.166 | 30 | 0.218 | 30 | 0.416 | 2  | 0.278 | 0.24  | N | 0.51 | SignalP-TM   |
| gj_188523304.gb_ACD612491_ | 0.145 | 31 | 0.124 | 37 | 0.128 | 29 | 0.096 | 0.111 | N | 0.57 | SignalP-noTM |
| gj_188523305.gb_ACD612501_ | 0.109 | 11 | 0.093 | 37 | 0.097 | 23 | 0.072 | 0.083 | N | 0.57 | SignalP-noTM |
| gj_188523306.gb_ACD612511_ | 0.224 | 28 | 0.153 | 22 | 0.22  | 7  | 0.152 | 0.153 | N | 0.51 | SignalP-TM   |
| gj_188523311.gb_ACD612561_ | 0.134 | 35 | 0.151 | 35 | 0.319 | 28 | 0.136 | 0.144 | N | 0.57 | SignalP-noTM |
| gj_188523315.gb_ACD612601_ | 0.139 | 23 | 0.162 | 11 | 0.35  | 1  | 0.265 | 0.2   | N | 0.51 | SignalP-TM   |
| gj_188523316.gb_ACD612611_ | 0.245 | 25 | 0.263 | 25 | 0.533 | 6  | 0.349 | 0.303 | N | 0.57 | SignalP-noTM |
| gj_188523317.gb_ACD612621_ | 0.768 | 30 | 0.798 | 30 | 0.958 | 19 | 0.871 | 0.832 | Y | 0.57 | SignalP-noTM |
| gj_188523320.gb_ACD612651_ | 0.117 | 37 | 0.112 | 46 | 0.141 | 40 | 0.092 | 0.103 | N | 0.57 | SignalP-noTM |
| gj_188523321.gb_ACD612661_ | 0.13  | 47 | 0.201 | 47 | 0.476 | 38 | 0.18  | 0.191 | N | 0.57 | SignalP-noTM |
| gj_188523322.gb_ACD612671_ | 0.118 | 47 | 0.124 | 12 | 0.193 | 10 | 0.155 | 0.139 | N | 0.57 | SignalP-noTM |
| gj_188523323.gb_ACD612681_ | 0.121 | 59 | 0.116 | 32 | 0.158 | 28 | 0.119 | 0.117 | N | 0.51 | SignalP-TM   |
| gj_188523329.gb_ACD612741_ | 0.135 | 39 | 0.113 | 39 | 0.113 | 38 | 0.081 | 0.098 | N | 0.57 | SignalP-noTM |
| gj_188523333.gb_ACD612781_ | 0.116 | 24 | 0.118 | 24 | 0.154 | 21 | 0.113 | 0.116 | N | 0.57 | SignalP-noTM |
| gj_188523334.gb_ACD612791_ | 0.149 | 20 | 0.184 | 20 | 0.291 | 15 | 0.196 | 0.189 | N | 0.51 | SignalP-TM   |
| gj_188523336.gb_ACD612811_ | 0.139 | 28 | 0.251 | 15 | 0.723 | 10 | 0.589 | 0.41  | N | 0.57 | SignalP-noTM |
| gj_188523346.gb_ACD612911_ | 0.107 | 29 | 0.184 | 11 | 0.426 | 1  | 0.338 | 0.257 | N | 0.57 | SignalP-noTM |
| gj_188523348.gb_ACD612931_ | 0.231 | 39 | 0.178 | 39 | 0.35  | 2  | 0.193 | 0.184 | N | 0.51 | SignalP-TM   |
| gj_188523349.gb_ACD612941_ | 0.784 | 28 | 0.286 | 28 | 0.163 | 1  | 0.121 | 0.209 | N | 0.57 | SignalP-noTM |
| gj_188523350.gb_ACD612951_ | 0.115 | 37 | 0.139 | 11 | 0.325 | 10 | 0.189 | 0.162 | N | 0.57 | SignalP-noTM |
| gj_188523356.gb_ACD613011_ | 0.153 | 33 | 0.142 | 33 | 0.222 | 31 | 0.131 | 0.137 | N | 0.57 | SignalP-noTM |
| gj_188523357.gb_ACD613021_ | 0.119 | 44 | 0.106 | 44 | 0.12  | 50 | 0.081 | 0.094 | N | 0.57 | SignalP-noTM |
| gj_188523360.gb_ACD613051_ | 0.141 | 65 | 0.134 | 33 | 0.282 | 32 | 0.15  | 0.141 | N | 0.57 | SignalP-noTM |
| gj_188523361.gb_ACD613061_ | 0.116 | 29 | 0.146 | 11 | 0.337 | 2  | 0.197 | 0.17  | N | 0.57 | SignalP-noTM |
| gj_188523362.gb_ACD613071_ | 0.105 | 39 | 0.12  | 15 | 0.17  | 11 | 0.144 | 0.131 | N | 0.57 | SignalP-noTM |
| gj_188523363.gb_ACD613081_ | 0.144 | 41 | 0.151 | 11 | 0.341 | 1  | 0.215 | 0.181 | N | 0.57 | SignalP-noTM |
| gj_188523364.gb_ACD613091_ | 0.364 | 33 | 0.235 | 33 | 0.244 | 30 | 0.135 | 0.188 | N | 0.57 | SignalP-noTM |
| gj_188523365.gb_ACD613101_ | 0.126 | 37 | 0.12  | 37 | 0.179 | 25 | 0.089 | 0.106 | N | 0.57 | SignalP-noTM |
| gj_188523366.gb_ACD613111_ | 0.133 | 48 | 0.119 | 27 | 0.167 | 1  | 0.121 | 0.12  | N | 0.57 | SignalP-noTM |
| gj_188523367.gb_ACD613121_ | 0.139 | 22 | 0.134 | 22 | 0.196 | 1  | 0.138 | 0.136 | N | 0.57 | SignalP-noTM |
| gj_188523370.gb_ACD613151_ | 0.144 | 46 | 0.139 | 46 | 0.173 | 44 | 0.094 | 0.118 | N | 0.57 | SignalP-noTM |
| gj_188523371.gb_ACD613161_ | 0.207 | 46 | 0.132 | 46 | 0.176 | 11 | 0.102 | 0.118 | N | 0.57 | SignalP-noTM |
| gj_188523372.gb_ACD613171_ | 0.11  | 35 | 0.113 | 18 | 0.156 | 9  | 0.121 | 0.117 | N | 0.57 | SignalP-noTM |
| gj_188523373.gb_ACD613181_ | 0.199 | 23 | 0.309 | 23 | 0.575 | 21 | 0.434 | 0.368 | N | 0.57 | SignalP-noTM |
| gj_188523375.gb_ACD613201_ | 0.101 | 32 | 0.202 | 11 | 0.47  | 10 | 0.402 | 0.296 | N | 0.57 | SignalP-noTM |
| gj_188523376.gb_ACD613211_ | 0.207 | 22 | 0.181 | 11 | 0.438 | 1  | 0.324 | 0.234 | N | 0.51 | SignalP-TM   |
| gj_188523377.gb_ACD613221_ | 0.14  | 53 | 0.141 | 11 | 0.312 | 1  | 0.183 | 0.161 | N | 0.57 | SignalP-noTM |
| gj_188523378.gb_ACD613231_ | 0.336 | 43 | 0.164 | 43 | 0.1   | 55 | 0.074 | 0.122 | N | 0.57 | SignalP-noTM |
| gj_188523379.gb_ACD613241_ | 0.145 | 28 | 0.124 | 28 | 0.149 | 19 | 0.089 | 0.107 | N | 0.57 | SignalP-noTM |
| gj_188523381.gb_ACD613261_ | 0.115 | 22 | 0.146 | 13 | 0.28  | 9  | 0.215 | 0.178 | N | 0.57 | SignalP-noTM |

|          |          |          |          |                            |
|----------|----------|----------|----------|----------------------------|
| 0.237398 | 0.881216 | 0.186032 | 0.434882 | gj_188523404.gb_ACD613491_ |
| 0.235772 | 0.067358 | 0.158691 | 0.15394  | gj_188523405.gb_ACD613501_ |
| 0.114457 | 0.09984  | 0.211318 | 0.141872 | gj_188523410.gb_ACD613551_ |
| 0.102845 | 0.078928 | 0.187399 | 0.123057 | gj_188523411.gb_ACD613561_ |
| 0.341414 | 0.078928 | 0.422627 | 0.28099  | gj_188523412.gb_ACD613571_ |
| 0.898003 | 0.50675  | 0.869778 | 0.758444 | gj_188523414.gb_ACD613591_ |
| 0.447692 | 0.159092 | 0.514246 | 0.373677 | gj_188523415.gb_ACD613601_ |
| 0.071028 | 0.037906 | 0.107647 | 0.072194 | gj_188523416.gb_ACD613611_ |
| 0.103123 | 0.066982 | 0.165619 | 0.111908 | gj_188523417.gb_ACD613621_ |
| 0.966625 | 0.985741 | 0.876749 | 0.943038 | gj_188523418.gb_ACD613631_ |
| 0.871804 | 0.997006 | 0.821127 | 0.896646 | gj_188523419.gb_ACD613641_ |
| 0.87804  | 0.993867 | 0.83355  | 0.901819 | gj_188523420.gb_ACD613651_ |
| 0.086669 | 0.031768 | 0.109975 | 0.076137 | gj_188523421.gb_ACD613661_ |
| 0.507499 | 0.983665 | 0.707857 | 0.733007 | gj_188523425.gb_ACD613701_ |
| 0.948339 | 0.954174 | 0.936672 | 0.946395 | gj_188523427.gb_ACD613721_ |
| 0.115986 | 0.089806 | 0.190618 | 0.132137 | gj_188523428.gb_ACD613731_ |
| 0.159896 | 0.186032 | 0.151228 | 0.165719 | gj_188523429.gb_ACD613741_ |
| 0.551566 | 0.931311 | 0.684386 | 0.722421 | gj_188523432.gb_ACD613771_ |
| 0.645656 | 0.567829 | 0.70537  | 0.639618 | gj_188523433.gb_ACD613781_ |
| 0.096129 | 0.050787 | 0.108806 | 0.085241 | gj_188523434.gb_ACD613791_ |
| 0.068689 | 0.051515 | 0.082944 | 0.067716 | gj_188523435.gb_ACD613801_ |
| 0.944538 | 0.999977 | 0.811227 | 0.918581 | gj_188523436.gb_ACD613811_ |
| 0.14295  | 0.081585 | 0.157892 | 0.127476 | gj_188523437.gb_ACD613821_ |
| 0.086196 | 0.012481 | 0.177118 | 0.091931 | gj_188523438.gb_ACD613831_ |
| 0.748758 | 0.184222 | 0.776953 | 0.569978 | gj_188523439.gb_ACD613841_ |
| 0.953779 | 0.980334 | 0.89853  | 0.944214 | gj_188523440.gb_ACD613851_ |
| 0.26386  | 0.029627 | 0.398672 | 0.23072  | gj_188523441.gb_ACD613861_ |
| 0.089562 | 0.06262  | 0.174078 | 0.108753 | gj_188523442.gb_ACD613871_ |
| 0.269138 | 0.633207 | 0.29713  | 0.399825 | gj_188523444.gb_ACD613891_ |
| 0.141851 | 0.001417 | 0.161921 | 0.10173  | gj_188523445.gb_ACD613901_ |
| 0.148913 | 0.040272 | 0.209325 | 0.13297  | gj_188523446.gb_ACD613911_ |
| 0.190156 | 0.508999 | 0.154727 | 0.284627 | gj_188523                  |

|                            |       |    |       |    |       |    |       |       |   |      |              |
|----------------------------|-------|----|-------|----|-------|----|-------|-------|---|------|--------------|
| gj_188523382_gb_ACD61327.1 | 0.136 | 28 | 0.162 | 26 | 0.265 | 6  | 0.216 | 0.188 | N | 0.57 | SignalP-noTM |
| gj_188523383_gb_ACD61328.1 | 0.143 | 42 | 0.106 | 42 | 0.153 | 2  | 0.082 | 0.095 | N | 0.57 | SignalP-noTM |
| gj_188523384_gb_ACD61329.1 | 0.174 | 27 | 0.16  | 20 | 0.271 | 1  | 0.182 | 0.17  | N | 0.57 | SignalP-noTM |
| gj_188523385_gb_ACD61330.1 | 0.375 | 38 | 0.268 | 38 | 0.49  | 1  | 0.223 | 0.251 | N | 0.51 | SignalP-TM   |
| gj_188523386_gb_ACD61331.1 | 0.122 | 70 | 0.147 | 11 | 0.286 | 3  | 0.218 | 0.181 | N | 0.57 | SignalP-noTM |
| gj_188523392_gb_ACD61337.1 | 0.155 | 70 | 0.145 | 11 | 0.262 | 3  | 0.224 | 0.182 | N | 0.57 | SignalP-noTM |
| gj_188523393_gb_ACD61338.1 | 0.102 | 15 | 0.13  | 11 | 0.252 | 3  | 0.17  | 0.149 | N | 0.57 | SignalP-noTM |
| gj_188523394_gb_ACD61339.1 | 0.11  | 36 | 0.139 | 11 | 0.258 | 3  | 0.194 | 0.165 | N | 0.57 | SignalP-noTM |
| gj_188523395_gb_ACD61340.1 | 0.102 | 37 | 0.11  | 11 | 0.137 | 1  | 0.119 | 0.114 | N | 0.57 | SignalP-noTM |
| gj_188523396_gb_ACD61341.1 | 0.128 | 42 | 0.145 | 14 | 0.251 | 5  | 0.209 | 0.175 | N | 0.57 | SignalP-noTM |
| gj_188523397_gb_ACD61342.1 | 0.113 | 35 | 0.108 | 68 | 0.115 | 69 | 0.084 | 0.096 | N | 0.57 | SignalP-noTM |
| gj_188523400_gb_ACD61345.1 | 0.137 | 51 | 0.123 | 31 | 0.217 | 1  | 0.126 | 0.124 | N | 0.51 | SignalP-TM   |
| gj_188523404_gb_ACD61349.1 | 0.178 | 25 | 0.212 | 40 | 0.518 | 44 | 0.249 | 0.23  | N | 0.57 | SignalP-noTM |
| gj_188523405_gb_ACD61350.1 | 0.26  | 31 | 0.163 | 31 | 0.148 | 3  | 0.093 | 0.13  | N | 0.57 | SignalP-noTM |
| gj_188523410_gb_ACD61355.1 | 0.11  | 24 | 0.121 | 11 | 0.21  | 3  | 0.154 | 0.133 | N | 0.51 | SignalP-TM   |
| gj_188523411_gb_ACD61356.1 | 0.187 | 35 | 0.188 | 19 | 0.316 | 2  | 0.233 | 0.205 | N | 0.51 | SignalP-TM   |
| gj_188523412_gb_ACD61357.1 | 0.161 | 24 | 0.164 | 24 | 0.259 | 13 | 0.167 | 0.165 | N | 0.51 | SignalP-TM   |
| gj_188523414_gb_ACD61359.1 | 0.152 | 27 | 0.226 | 11 | 0.628 | 3  | 0.534 | 0.34  | N | 0.51 | SignalP-TM   |
| gj_188523415_gb_ACD61360.1 | 0.524 | 44 | 0.447 | 44 | 0.495 | 28 | 0.262 | 0.379 | N | 0.51 | SignalP-TM   |
| gj_188523416_gb_ACD61361.1 | 0.233 | 48 | 0.236 | 48 | 0.457 | 46 | 0.126 | 0.184 | N | 0.57 | SignalP-noTM |
| gj_188523417_gb_ACD61362.1 | 0.142 | 35 | 0.145 | 18 | 0.293 | 1  | 0.18  | 0.161 | N | 0.57 | SignalP-noTM |
| gj_188523418_gb_ACD61363.1 | 0.144 | 20 | 0.108 | 58 | 0.136 | 49 | 0.086 | 0.098 | N | 0.57 | SignalP-noTM |
| gj_188523419_gb_ACD61364.1 | 0.196 | 23 | 0.315 | 23 | 0.862 | 1  | 0.621 | 0.459 | N | 0.57 | SignalP-noTM |
| gj_188523420_gb_ACD61365.1 | 0.248 | 20 | 0.474 | 20 | 0.948 | 8  | 0.911 | 0.679 | Y | 0.57 | SignalP-noTM |
| gj_188523421_gb_ACD61366.1 | 0.145 | 20 | 0.132 | 20 | 0.216 | 2  | 0.13  | 0.131 | N | 0.57 | SignalP-noTM |
| gj_188523425_gb_ACD61370.1 | 0.114 | 27 | 0.179 | 27 | 0.339 | 21 | 0.262 | 0.218 | N | 0.57 | SignalP-noTM |
| gj_188523427_gb_ACD61372.1 | 0.34  | 69 | 0.289 | 21 | 0.495 | 15 | 0.339 | 0.307 | N | 0.51 | SignalP-TM   |
| gj_188523428_gb_ACD61373.1 | 0.155 | 17 | 0.138 | 53 | 0.224 | 29 | 0.121 | 0.13  | N | 0.57 | SignalP-noTM |
| gj_188523429_gb_ACD61374.1 | 0.303 | 39 | 0.182 | 39 | 0.255 | 2  | 0.11  | 0.148 | N | 0.57 | SignalP-noTM |
| gj_188523432_gb_ACD61377.1 | 0.129 | 10 | 0.175 | 12 | 0.376 | 4  | 0.318 | 0.242 | N | 0.57 | SignalP-noTM |
| gj_188523433_gb_ACD61378.1 | 0.232 | 45 | 0.297 | 45 | 0.513 | 36 | 0.257 | 0.282 | N | 0.51 | SignalP-TM   |
| gj_188523434_gb_ACD61379.1 | 0.531 | 21 | 0.713 | 21 | 0.971 | 13 | 0.943 | 0.821 | Y | 0.57 | SignalP-noTM |
| gj_188523435_gb_ACD61380.1 | 0.118 | 26 | 0.097 | 69 | 0.117 | 3  | 0.085 | 0.092 | N | 0.57 | SignalP-noTM |
| gj_188523436_gb_ACD61381.1 | 0.138 | 5  | 0.144 | 19 | 0.268 | 9  | 0.17  | 0.156 | N | 0.57 | SignalP-noTM |
| gj_188523437_gb_ACD61382.1 | 0.158 | 48 | 0.152 | 48 | 0.352 | 1  | 0.168 | 0.159 | N | 0.57 | SignalP-noTM |
| gj_188523438_gb_ACD61383.1 | 0.215 | 27 | 0.235 | 27 | 0.63  | 5  | 0.388 | 0.292 | N | 0.51 | SignalP-TM   |
| gj_188523439_gb_ACD61384.1 | 0.301 | 15 | 0.524 | 15 | 0.976 | 9  | 0.901 | 0.701 | Y | 0.57 | SignalP-noTM |
| gj_188523440_gb_ACD61385.1 | 0.86  | 24 | 0.835 | 24 | 0.936 | 17 | 0.844 | 0.839 | Y | 0.57 | SignalP-noTM |
| gj_188523441_gb_ACD61386.1 | 0.125 | 29 | 0.13  | 11 | 0.239 | 2  | 0.173 | 0.15  | N | 0.57 | SignalP-noTM |
| gj_188523442_gb_ACD61387.1 | 0.107 | 28 | 0.095 | 68 | 0.103 | 10 | 0.085 | 0.09  | N | 0.57 | SignalP-noTM |
| gj_188523444_gb_ACD61389.1 | 0.156 | 42 | 0.146 | 42 | 0.234 | 19 | 0.152 | 0.149 | N | 0.57 | SignalP-noTM |
| gj_188523445_gb_ACD61390.1 | 0.189 | 44 | 0.214 | 44 | 0.481 | 11 | 0.223 | 0.218 | N | 0.57 | SignalP-noTM |
| gj_188523446_gb_ACD61391.1 | 0.127 | 34 | 0.137 | 54 | 0.241 | 48 | 0.123 | 0.131 | N | 0.57 | SignalP-noTM |
| gj_188523447_gb_ACD61392.1 | 0.252 | 32 | 0.11  | 32 | 0.147 | 1  | 0.081 | 0.099 | N | 0.51 | SignalP-TM   |
| gj_188523448_gb_ACD61393.1 | 0.121 | 26 | 0.124 | 11 | 0.275 | 1  | 0.14  | 0.13  | N | 0.51 | SignalP-TM   |
| gj_188523449_gb_ACD61394.1 | 0.14  | 23 | 0.128 | 56 | 0.221 | 49 | 0.09  | 0.11  | N | 0.57 | SignalP-noTM |
| gj_188523451_gb_ACD61396.1 | 0.151 | 33 | 0.141 | 33 | 0.269 | 1  | 0.151 | 0.145 | N | 0.51 | SignalP-TM   |
| gj_188523453_gb_ACD61398.1 | 0.137 | 25 | 0.145 | 25 | 0.335 | 24 | 0.146 | 0.146 | N | 0.57 | SignalP-noTM |
| gj_188523456_gb_ACD61401.1 | 0.211 | 30 | 0.158 | 30 | 0.206 | 36 | 0.129 | 0.144 | N | 0.57 | SignalP-noTM |
| gj_188523457_gb_ACD61402.1 | 0.167 | 21 | 0.163 | 21 | 0.247 | 3  | 0.186 | 0.171 | N | 0.51 | SignalP-TM   |
| gj_188523459_gb_ACD61404.1 | 0.836 | 21 | 0.867 | 21 | 0.943 | 19 | 0.883 | 0.875 | Y | 0.57 | SignalP-noTM |
| gj_188523460_gb_ACD61405.1 | 0.123 | 20 | 0.128 | 20 | 0.178 | 2  | 0.139 | 0.133 | N | 0.57 | SignalP-noTM |
| gj_188523462_gb_ACD61407.1 | 0.105 | 45 | 0.136 | 11 | 0.262 | 3  | 0.179 | 0.156 | N | 0.57 | SignalP-noTM |
| gj_188523463_gb_ACD61408.1 | 0.109 | 32 | 0.102 | 57 | 0.12  | 50 | 0.093 | 0.098 | N | 0.57 | SignalP-noTM |
| gj_188523469_gb_ACD61414.1 | 0.101 | 32 | 0.114 | 27 | 0.168 | 22 | 0.116 | 0.115 | N | 0.51 | SignalP-TM   |
| gj_188523470_gb_ACD61415.1 | 0.135 | 21 | 0.141 | 21 | 0.278 | 27 | 0.154 | 0.147 | N | 0.57 | SignalP-noTM |
| gj_188523471_gb_ACD61416.1 | 0.353 | 26 | 0.589 | 26 | 0.993 | 15 | 0.977 | 0.771 | Y | 0.57 | SignalP-noTM |
| gj_188523472_gb_ACD61417.1 | 0.103 | 29 | 0.103 | 29 | 0.117 | 27 | 0.096 | 0.1   | N | 0.57 | SignalP-noTM |
| gj_188523473_gb_ACD61418.1 | 0.202 | 20 | 0.202 | 20 | 0.326 | 29 | 0.203 | 0.202 | N | 0.51 | SignalP-TM   |
| gj_188523474_gb_ACD61419.1 | 0.143 | 20 | 0.156 | 11 | 0.445 | 2  | 0.229 | 0.19  | N | 0.57 | SignalP-noTM |
| gj_188523475_gb_ACD61420.1 | 0.106 | 31 | 0.116 | 11 | 0.198 | 2  | 0.134 | 0.124 | N | 0.57 | SignalP-noTM |
| gj_188523477_gb_ACD61422.1 | 0.119 | 30 | 0.102 | 30 | 0.108 | 29 | 0.075 | 0.089 | N | 0.57 | SignalP-noTM |
| gj_188523483_gb_ACD61428.1 | 0.411 | 21 | 0.358 | 21 | 0.512 | 16 | 0.275 | 0.319 | N | 0.57 | SignalP-noTM |
| gj_188523484_gb_ACD61429.1 | 0.108 | 30 | 0.116 | 11 | 0.2   | 2  | 0.129 | 0.122 | N | 0.57 | SignalP-noTM |
| gj_188523488_gb_ACD61433.1 | 0.105 | 20 | 0.102 | 62 | 0.136 | 1  | 0.094 | 0.098 | N | 0.57 | SignalP-noTM |
| gj_188523494_gb_ACD61439.1 | 0.311 | 26 | 0.199 | 26 | 0.243 | 22 | 0.109 | 0.157 | N | 0.57 | SignalP-noTM |
| gj_188523496_gb_ACD61441.1 | 0.109 | 62 | 0.105 | 18 | 0.134 | 14 | 0.109 | 0.107 | N | 0.57 | SignalP-noTM |
| gj_188523502_gb_ACD61447.1 | 0.655 | 33 | 0.794 | 33 | 0.99  | 18 | 0.929 | 0.858 | Y | 0.57 | SignalP-noTM |
| gj_188523506_gb_ACD61451.1 | 0.339 | 30 | 0.436 | 30 | 0.732 | 24 | 0.548 | 0.489 | N | 0.57 | SignalP-noTM |
| gj_188523508_gb_ACD61453.1 | 0.138 | 47 | 0.178 | 22 | 0.354 | 19 | 0.257 | 0.215 | N | 0.57 | SignalP-noTM |
| gj_188523509_gb_ACD61454.1 | 0.156 | 42 | 0.144 | 42 | 0.208 | 19 | 0.137 | 0.141 | N | 0.57 | SignalP-noTM |
| gj_188523510_gb_ACD61455.1 | 0.128 | 29 | 0.123 | 29 | 0.141 | 26 | 0.098 | 0.111 | N | 0.57 | SignalP-noTM |
| gj_188523511_gb_ACD61456.1 | 0.111 | 26 | 0.1   | 65 | 0.105 | 34 | 0.078 | 0.089 | N | 0.57 | SignalP-noTM |
| gj_188523512_gb_ACD61457.1 | 0.134 | 28 | 0.162 | 14 | 0.343 | 1  | 0.256 | 0.197 | N | 0.51 | SignalP-TM   |
| gj_188523514_gb_ACD61459.1 | 0.111 | 9  | 0.106 | 68 | 0.124 | 62 | 0.09  | 0.098 | N | 0.57 | SignalP-noTM |
| gj_188523517_gb_ACD61462.1 | 0.166 | 17 | 0.139 | 17 | 0.335 | 1  | 0.151 | 0.144 | N | 0.51 | SignalP-TM   |
| gj_188523520_gb_ACD61465.1 | 0.13  | 37 | 0.136 | 11 | 0.273 | 2  | 0.18  | 0.156 | N | 0.57 | SignalP-noTM |
| gj_188523521_gb_ACD61466.1 | 0.118 | 15 | 0.127 | 11 | 0.204 | 7  | 0.158 | 0.138 | N | 0.51 | SignalP-TM   |

|          |          |          |          |                            |
|----------|----------|----------|----------|----------------------------|
| 0.262697 | 0.935414 | 0.158291 | 0.452134 | gj_188521884_gb_ACD59829.1 |
| 0.106215 | 0.050642 | 0.109389 | 0.088749 | gj_188521885_gb_ACD59830.1 |
| 0.072831 | 0.363316 | 0.120045 | 0.185397 | gj_188521886_gb_ACD59831.1 |
| 0.097969 | 0.01356  | 0.102569 | 0.071366 | gj_188521887_gb_ACD59832.1 |
| 0.094063 | 0.00049  | 0.14295  | 0.079168 | gj_188521888_gb_ACD59833.1 |
| 0.105647 | 0.022183 | 0.126529 | 0.084786 | gj_188521889_gb_ACD59834.1 |
| 0.195289 | 0.028113 | 0.220974 | 0.148125 | gj_188521890_gb_ACD59835.1 |
| 0.120681 | 0.235772 | 0.093046 | 0.149833 | gj_188521891_gb_ACD59836.1 |
| 0.101744 | 0.053454 | 0.09639  | 0.083863 | gj_188521892_gb_ACD59837.1 |
| 0.188943 | 0.020075 | 0.090298 | 0.099105 | gj_188521894_gb_ACD59839.1 |
| 0.639455 | 0.681137 | 0.770653 | 0.697082 | gj_188521895_gb_ACD59840.1 |
| 0.120363 | 0.132274 | 0.207839 | 0.153492 | gj_188521901_gb_ACD59846.1 |
| 0.882155 | 0.973247 | 0.67787  | 0.844424 | gj_188521902_gb_ACD59847.1 |
| 0.949213 | 0.973325 | 0.893214 | 0.938584 | gj_188521906_gb_ACD59851.1 |
| 0.920853 | 0.995082 | 0.872806 | 0.92958  | gj_188521919_gb_ACD59864.1 |
| 0.144427 | 0.005006 | 0.225133 | 0.124855 | gj_188521920_gb_ACD59865.1 |
| 0.110563 | 0.424824 | 0.089806 | 0.208398 | gj_188521926_gb_ACD59871.1 |
| 0.186943 | 0.854458 | 0.105364 | 0.382255 | gj_188521928_gb_ACD59873.1 |
| 0.664631 | 0.638763 | 0.638071 | 0.647155 | gj_188521929_gb_ACD59874.1 |
| 0.092289 | 0.038126 | 0.092541 | 0.074319 | gj_188521930_gb_ACD59875.1 |
| 0.075091 | 0.010477 | 0.099034 | 0.061534 | gj_188521931_gb_ACD59876.1 |
| 0.138955 | 0.132964 | 0.124881 | 0.132267 | gj_188521932_gb_ACD59877.1 |
| 0.096651 | 0.009613 | 0.134354 | 0.080206 | gj_188521935_gb_ACD59880.1 |
| 0.195761 | 0.004456 | 0.271505 | 0.157241 | gj_188521936_gb_ACD59881.1 |
| 0.126198 | 0.007923 | 0.126861 | 0.086994 | gj_188521942_gb_ACD59887.1 |
| 0.924909 | 0.999549 | 0.782109 | 0.902189 | gj_188521944_gb_ACD59889.1 |
| 0.098302 | 0.040855 | 0.111749 | 0.083969 | gj_188521946_gb_ACD59891.1 |
| 0.230942 | 0.998431 | 0.198134 | 0.475836 | gj_188521952_gb_ACD59897.1 |
| 0.330041 | 0.844487 | 0.464808 | 0.546465 | gj_188521953_gb_ACD59898.1 |
| 0.085489 | 0.031861 | 0.10736  | 0.074903 | gj_188523558_gb_ACD61503.1 |
| 0.203429 | 0.033667 | 0.229878 | 0.155658 | gj_188523559_gb_ACD61504.1 |
| 0.156699 | 0.087864 | 0.15046  | 0.131674 | gj_188523560_gb_ACD61505.1 |
| 0.350919 | 0.797057 | 0.419701 | 0.522559 | gj_188523561_gb_ACD61506.1 |
| 0.144427 | 0.031129 | 0        |          |                            |

|                            |       |    |       |    |       |    |       |       |   |      |              |  |
|----------------------------|-------|----|-------|----|-------|----|-------|-------|---|------|--------------|--|
| gj_188523524_gb_ACD61469.1 | 0.125 | 40 | 0.1   | 40 | 0.11  | 12 | 0.084 | 0.092 | N | 0.57 | SignalP-noTM |  |
| gj_188523525_gb_ACD61470.1 | 0.13  | 45 | 0.128 | 25 | 0.185 | 20 | 0.143 | 0.135 | N | 0.57 | SignalP-noTM |  |
| gj_188523526_gb_ACD61471.1 | 0.185 | 19 | 0.143 | 19 | 0.193 | 18 | 0.112 | 0.128 | N | 0.57 | SignalP-noTM |  |
| gj_188523529_gb_ACD61474.1 | 0.115 | 22 | 0.146 | 13 | 0.28  | 9  | 0.215 | 0.178 | N | 0.57 | SignalP-noTM |  |
| gj_188523532_gb_ACD61477.1 | 0.277 | 33 | 0.179 | 33 | 0.167 | 32 | 0.109 | 0.146 | N | 0.57 | SignalP-noTM |  |
| gj_188523536_gb_ACD61481.1 | 0.159 | 19 | 0.132 | 19 | 0.161 | 38 | 0.104 | 0.119 | N | 0.57 | SignalP-noTM |  |
| gj_188523543_gb_ACD61488.1 | 0.115 | 23 | 0.151 | 13 | 0.338 | 12 | 0.214 | 0.18  | N | 0.57 | SignalP-noTM |  |
| gj_188523544_gb_ACD61489.1 | 0.111 | 27 | 0.123 | 11 | 0.202 | 5  | 0.163 | 0.138 | N | 0.51 | SignalP-TM   |  |
| gj_188523545_gb_ACD61490.1 | 0.111 | 9  | 0.11  | 36 | 0.136 | 28 | 0.082 | 0.097 | N | 0.57 | SignalP-noTM |  |
| gj_188523546_gb_ACD61491.1 | 0.123 | 22 | 0.131 | 27 | 0.178 | 36 | 0.128 | 0.13  | N | 0.57 | SignalP-noTM |  |
| gj_188523550_gb_ACD61495.1 | 0.103 | 21 | 0.107 | 50 | 0.123 | 28 | 0.101 | 0.104 | N | 0.57 | SignalP-noTM |  |
| gj_188523558_gb_ACD61503.1 | 0.167 | 30 | 0.135 | 30 | 0.214 | 47 | 0.102 | 0.119 | N | 0.57 | SignalP-noTM |  |
| gj_188523559_gb_ACD61504.1 | 0.12  | 26 | 0.134 | 26 | 0.208 | 22 | 0.141 | 0.137 | N | 0.57 | SignalP-noTM |  |
| gj_188523560_gb_ACD61505.1 | 0.138 | 67 | 0.115 | 11 | 0.176 | 7  | 0.138 | 0.123 | N | 0.51 | SignalP-TM   |  |
| gj_188523561_gb_ACD61506.1 | 0.603 | 22 | 0.72  | 22 | 0.963 | 18 | 0.87  | 0.79  | Y | 0.57 | SignalP-noTM |  |
| gj_188523563_gb_ACD61508.1 | 0.258 | 29 | 0.226 | 29 | 0.351 | 8  | 0.205 | 0.218 | N | 0.51 | SignalP-TM   |  |
| gj_188523564_gb_ACD61509.1 | 0.135 | 56 | 0.179 | 11 | 0.428 | 4  | 0.323 | 0.247 | N | 0.57 | SignalP-noTM |  |
| gj_188523565_gb_ACD61510.1 | 0.101 | 55 | 0.191 | 11 | 0.395 | 4  | 0.37  | 0.275 | N | 0.57 | SignalP-noTM |  |
| gj_188523566_gb_ACD61511.1 | 0.175 | 33 | 0.148 | 33 | 0.218 | 32 | 0.113 | 0.132 | N | 0.57 | SignalP-noTM |  |
| gj_188523567_gb_ACD61512.1 | 0.522 | 30 | 0.512 | 30 | 0.641 | 27 | 0.449 | 0.488 | N | 0.51 | SignalP-TM   |  |
| gj_188523568_gb_ACD61513.1 | 0.104 | 8  | 0.102 | 23 | 0.122 | 14 | 0.096 | 0.099 | N | 0.57 | SignalP-noTM |  |
| gj_188523569_gb_ACD61514.1 | 0.27  | 13 | 0.349 | 13 | 0.723 | 10 | 0.45  | 0.396 | N | 0.57 | SignalP-noTM |  |
| gj_188523570_gb_ACD61515.1 | 0.741 | 20 | 0.731 | 20 | 0.843 | 1  | 0.73  | 0.73  | Y | 0.57 | SignalP-noTM |  |
| gj_188523571_gb_ACD61516.1 | 0.167 | 54 | 0.182 | 54 | 0.319 | 44 | 0.156 | 0.17  | N | 0.57 | SignalP-noTM |  |
| gj_188523573_gb_ACD61518.1 | 0.115 | 63 | 0.131 | 12 | 0.233 | 4  | 0.178 | 0.153 | N | 0.57 | SignalP-noTM |  |
| gj_188523574_gb_ACD61519.1 | 0.115 | 22 | 0.145 | 13 | 0.273 | 9  | 0.21  | 0.175 | N | 0.57 | SignalP-noTM |  |
| gj_188523579_gb_ACD61524.1 | 0.122 | 60 | 0.116 | 42 | 0.159 | 8  | 0.12  | 0.118 | N | 0.57 | SignalP-noTM |  |
| gj_188523580_gb_ACD61525.1 | 0.108 | 17 | 0.112 | 17 | 0.153 | 11 | 0.114 | 0.113 | N | 0.57 | SignalP-noTM |  |
| gj_188523581_gb_ACD61526.1 | 0.79  | 20 | 0.872 | 20 | 0.975 | 16 | 0.952 | 0.909 | Y | 0.57 | SignalP-noTM |  |
| gj_188523582_gb_ACD61527.1 | 0.153 | 28 | 0.192 | 19 | 0.463 | 13 | 0.329 | 0.257 | N | 0.57 | SignalP-noTM |  |
| gj_188523585_gb_ACD61530.1 | 0.847 | 19 | 0.79  | 19 | 0.834 | 16 | 0.701 | 0.748 | Y | 0.57 | SignalP-noTM |  |
| gj_188523587_gb_ACD61532.1 | 0.14  | 50 | 0.166 | 30 | 0.352 | 27 | 0.192 | 0.176 | N | 0.51 | SignalP-TM   |  |
| gj_188523588_gb_ACD61533.1 | 0.169 | 37 | 0.153 | 37 | 0.365 | 34 | 0.115 | 0.135 | N | 0.57 | SignalP-noTM |  |
| gj_188523589_gb_ACD61534.1 | 0.105 | 20 | 0.104 | 62 | 0.133 | 1  | 0.094 | 0.099 | N | 0.57 | SignalP-noTM |  |
| gj_188523591_gb_ACD61536.1 | 0.111 | 28 | 0.223 | 12 | 0.523 | 1  | 0.455 | 0.332 | N | 0.57 | SignalP-noTM |  |
| gj_188523592_gb_ACD61537.1 | 0.186 | 27 | 0.114 | 27 | 0.148 | 51 | 0.079 | 0.098 | N | 0.57 | SignalP-noTM |  |
| gj_188523593_gb_ACD61538.1 | 0.123 | 30 | 0.103 | 30 | 0.105 | 34 | 0.081 | 0.093 | N | 0.57 | SignalP-noTM |  |
| gj_188523594_gb_ACD61539.1 | 0.105 | 13 | 0.117 | 11 | 0.201 | 1  | 0.125 | 0.121 | N | 0.57 | SignalP-noTM |  |
| gj_188523595_gb_ACD61540.1 | 0.138 | 54 | 0.135 | 11 | 0.216 | 8  | 0.189 | 0.16  | N | 0.57 | SignalP-noTM |  |
| gj_188523598_gb_ACD61543.1 | 0.134 | 20 | 0.211 | 20 | 0.492 | 2  | 0.366 | 0.284 | N | 0.57 | SignalP-noTM |  |
| gj_188523599_gb_ACD61544.1 | 0.156 | 34 | 0.124 | 11 | 0.231 | 1  | 0.145 | 0.134 | N | 0.57 | SignalP-noTM |  |
| gj_188523600_gb_ACD61545.1 | 0.15  | 41 | 0.119 | 41 | 0.173 | 2  | 0.105 | 0.113 | N | 0.57 | SignalP-noTM |  |
| gj_188523602_gb_ACD61547.1 | 0.115 | 42 | 0.095 | 34 | 0.139 | 1  | 0.077 | 0.087 | N | 0.57 | SignalP-noTM |  |
| gj_188523604_gb_ACD61549.1 | 0.107 | 18 | 0.098 | 28 | 0.122 | 3  | 0.09  | 0.095 | N | 0.57 | SignalP-noTM |  |
| gj_188523605_gb_ACD61550.1 | 0.118 | 42 | 0.104 | 42 | 0.104 | 26 | 0.084 | 0.094 | N | 0.57 | SignalP-noTM |  |
| gj_188523606_gb_ACD61551.1 | 0.214 | 57 | 0.237 | 35 | 0.499 | 6  | 0.353 | 0.292 | N | 0.57 | SignalP-noTM |  |
| gj_188523607_gb_ACD61552.1 | 0.126 | 55 | 0.1   | 69 | 0.145 | 1  | 0.081 | 0.091 | N | 0.57 | SignalP-noTM |  |
| gj_188523608_gb_ACD61553.1 | 0.119 | 29 | 0.161 | 11 | 0.333 | 1  | 0.248 | 0.202 | N | 0.57 | SignalP-noTM |  |
| gj_188523611_gb_ACD61556.1 | 0.433 | 31 | 0.558 | 31 | 0.985 | 13 | 0.868 | 0.704 | Y | 0.57 | SignalP-noTM |  |
| gj_188523612_gb_ACD61557.1 | 0.12  | 21 | 0.139 | 51 | 0.26  | 43 | 0.15  | 0.145 | N | 0.57 | SignalP-noTM |  |
| gj_188523613_gb_ACD61558.1 | 0.144 | 46 | 0.111 | 46 | 0.172 | 30 | 0.088 | 0.1   | N | 0.57 | SignalP-noTM |  |
| gj_188523614_gb_ACD61559.1 | 0.147 | 13 | 0.105 | 24 | 0.112 | 31 | 0.074 | 0.091 | N | 0.57 | SignalP-noTM |  |
| gj_188523620_gb_ACD61565.1 | 0.129 | 41 | 0.218 | 27 | 0.63  | 15 | 0.327 | 0.269 | N | 0.57 | SignalP-noTM |  |
| gj_188523623_gb_ACD61568.1 | 0.176 | 26 | 0.134 | 26 | 0.195 | 23 | 0.075 | 0.112 | N | 0.51 | SignalP-TM   |  |
| gj_188523626_gb_ACD61571.1 | 0.236 | 34 | 0.263 | 34 | 0.429 | 25 | 0.231 | 0.251 | N | 0.51 | SignalP-TM   |  |
| gj_188523627_gb_ACD61572.1 | 0.35  | 65 | 0.354 | 25 | 0.866 | 18 | 0.718 | 0.489 | N | 0.51 | SignalP-TM   |  |
| gj_188523629_gb_ACD61574.1 | 0.16  | 38 | 0.159 | 30 | 0.268 | 2  | 0.17  | 0.164 | N | 0.57 | SignalP-noTM |  |
| gj_188523633_gb_ACD61578.1 | 0.117 | 28 | 0.098 | 67 | 0.103 | 58 | 0.069 | 0.084 | N | 0.57 | SignalP-noTM |  |
| gj_188523634_gb_ACD61579.1 | 0.125 | 23 | 0.166 | 11 | 0.362 | 2  | 0.27  | 0.215 | N | 0.57 | SignalP-noTM |  |
| gj_188521883_gb_ACD59828.1 | 0.2   | 17 | 0.242 | 17 | 0.351 | 12 | 0.265 | 0.251 | N | 0.51 | SignalP-TM   |  |
| gj_188521884_gb_ACD59829.1 | 0.107 | 21 | 0.117 | 11 | 0.203 | 5  | 0.143 | 0.129 | N | 0.57 | SignalP-noTM |  |
| gj_188521885_gb_ACD59830.1 | 0.105 | 66 | 0.097 | 50 | 0.104 | 42 | 0.077 | 0.088 | N | 0.57 | SignalP-noTM |  |
| gj_188521886_gb_ACD59831.1 | 0.111 | 65 | 0.116 | 12 | 0.159 | 29 | 0.128 | 0.12  | N | 0.51 | SignalP-TM   |  |
| gj_188521887_gb_ACD59832.1 | 0.124 | 55 | 0.126 | 12 | 0.208 | 3  | 0.163 | 0.143 | N | 0.57 | SignalP-noTM |  |
| gj_188521888_gb_ACD59833.1 | 0.132 | 33 | 0.105 | 33 | 0.112 | 70 | 0.078 | 0.092 | N | 0.57 | SignalP-noTM |  |
| gj_188521889_gb_ACD59834.1 | 0.139 | 36 | 0.142 | 36 | 0.273 | 32 | 0.127 | 0.135 | N | 0.57 | SignalP-noTM |  |
| gj_188521890_gb_ACD59835.1 | 0.133 | 23 | 0.171 | 23 | 0.373 | 7  | 0.25  | 0.2   | N | 0.51 | SignalP-TM   |  |
| gj_188521891_gb_ACD59836.1 | 0.113 | 31 | 0.137 | 11 | 0.296 | 19 | 0.194 | 0.164 | N | 0.57 | SignalP-noTM |  |
| gj_188521892_gb_ACD59837.1 | 0.154 | 22 | 0.151 | 22 | 0.161 | 11 | 0.139 | 0.145 | N | 0.57 | SignalP-noTM |  |
| gj_188521894_gb_ACD59839.1 | 0.115 | 19 | 0.249 | 11 | 0.74  | 4  | 0.611 | 0.419 | N | 0.57 | SignalP-noTM |  |
| gj_188521895_gb_ACD59840.1 | 0.155 | 23 | 0.135 | 23 | 0.16  | 1  | 0.111 | 0.124 | N | 0.57 | SignalP-noTM |  |
| gj_188521901_gb_ACD59846.1 | 0.114 | 25 | 0.126 | 14 | 0.184 | 7  | 0.154 | 0.136 | N | 0.51 | SignalP-TM   |  |
| gj_188521902_gb_ACD59847.1 | 0.124 | 23 | 0.141 | 11 | 0.325 | 1  | 0.176 | 0.157 | N | 0.57 | SignalP-noTM |  |
| gj_188521906_gb_ACD59851.1 | 0.114 | 26 | 0.122 | 11 | 0.172 | 3  | 0.154 | 0.137 | N | 0.57 | SignalP-noTM |  |
| gj_188521919_gb_ACD59864.1 | 0.104 | 5  | 0.111 | 21 | 0.155 | 1  | 0.119 | 0.114 | N | 0.57 | SignalP-noTM |  |
| gj_188521920_gb_ACD59865.1 | 0.115 | 41 | 0.119 | 11 | 0.191 | 1  | 0.138 | 0.128 | N | 0.57 | SignalP-noTM |  |
| gj_188521926_gb_ACD59871.1 | 0.109 | 50 | 0.11  | 50 | 0.144 | 3  | 0.1   | 0.105 | N | 0.57 | SignalP-noTM |  |
| gj_188521928_gb_ACD59873.1 | 0.111 | 9  | 0.106 | 68 | 0.124 | 62 | 0.09  | 0.098 | N | 0.57 | SignalP-noTM |  |

|          |          |          |          |                            |
|----------|----------|----------|----------|----------------------------|
| 0.214333 | 0.225657 | 0.295879 | 0.24529  | gj_188521955_gb_ACD59900.1 |
| 0.928972 | 0.935776 | 0.86807  | 0.910939 | gj_188521956_gb_ACD59901.1 |
| 0.284144 | 0.90896  | 0.313674 | 0.502259 | gj_188521961_gb_ACD59906.1 |
| 0.253506 | 0.105081 | 0.136108 | 0.164898 | gj_188521962_gb_ACD59907.1 |
| 0.115679 | 0.055619 | 0.192476 | 0.121258 | gj_188521963_gb_ACD59908.1 |
| 0.141486 | 0.427759 | 0.097704 | 0.222316 | gj_188521964_gb_ACD59909.1 |
| 0.104799 | 0.040156 | 0.162329 | 0.102428 | gj_188521965_gb_ACD59910.1 |
| 0.083173 | 0.036509 | 0.115679 | 0.078454 | gj_188521966_gb_ACD59911.1 |
| 0.841309 | 0.066236 | 0.771711 | 0.559752 | gj_188521967_gb_ACD59912.1 |
| 0.302167 | 0.989615 | 0.110859 | 0.467547 | gj_188521970_gb_ACD59915.1 |
| 0.24177  | 0.085255 | 0.299643 | 0.208889 | gj_188521975_gb_ACD59920.1 |
| 0.559714 | 0.322785 | 0.707237 | 0.529912 | gj_188521979_gb_ACD59924.1 |
| 0.566014 | 0.138238 | 0.58904  | 0.427764 | gj_188521980_gb_ACD59925.1 |
| 0.934686 | 0.999878 | 0.879001 | 0.937855 | gj_188521981_gb_ACD59926.1 |
| 0.940307 | 0.990301 | 0.900698 | 0.943769 | gj_188522328_gb_ACD60273.1 |
| 0.858514 | 0.927775 | 0.752129 | 0.846139 | gj_188522330_gb_ACD60275.1 |
| 0.135053 | 0.029369 | 0.17023  | 0.111551 | gj_188522331_gb_ACD60276.1 |
| 0.945836 | 0.998928 | 0.895201 | 0.946688 | gj_188522333_gb_ACD60278.1 |
| 0.951478 | 0.984556 | 0.897982 | 0.944672 | gj_188522334_gb_ACD60279.1 |
| 0.083402 | 0.117222 | 0.174078 | 0.124901 | gj_188522336_gb_ACD60281.1 |
| 0.080247 | 0.059357 | 0.127862 | 0.089155 | gj_188522339_gb_ACD60284.1 |
| 0.130222 | 0.058525 | 0.118784 | 0.10251  | gj_188522340_gb_ACD60285.1 |
| 0.219428 | 0.545623 | 0.112346 | 0.292466 | gj_188522342_gb_ACD60287.1 |
| 0.155513 | 0.033472 | 0.166866 | 0.118617 | gj_188522343_gb_ACD60288.1 |
| 0.111749 | 0.197658 | 0.087384 | 0.132264 | gj_188522344_gb_ACD60289.1 |
| 0.114153 | 0.031676 | 0.123251 | 0.089693 | gj_188522347_gb_ACD60292.1 |
| 0.709096 | 0.049642 | 0.775912 | 0.51155  | gj_188522348_gb_ACD60293.1 |
| 0.102018 | 0.136108 | 0.089317 | 0.109148 | gj_188522349_gb_ACD60294.1 |
| 0.924701 | 0.993922 | 0.883706 | 0.93411  | gj_188522351_gb_ACD60296.1 |
| 0.208829 | 0.43807  | 0.185579 | 0.2774   |                            |

|                            |       |    |       |    |       |    |       |       |   |      |              |
|----------------------------|-------|----|-------|----|-------|----|-------|-------|---|------|--------------|
| gj_188521929_gb_ACD598741_ | 0.124 | 20 | 0.134 | 25 | 0.174 | 19 | 0.126 | 0.13  | N | 0.57 | SignalP-noTM |
| gj_188521930_gb_ACD598751_ | 0.12  | 40 | 0.117 | 40 | 0.132 | 32 | 0.099 | 0.108 | N | 0.57 | SignalP-noTM |
| gj_188521931_gb_ACD598761_ | 0.233 | 21 | 0.239 | 21 | 0.317 | 7  | 0.254 | 0.246 | N | 0.57 | SignalP-noTM |
| gj_188521932_gb_ACD598771_ | 0.142 | 33 | 0.166 | 19 | 0.386 | 9  | 0.213 | 0.188 | N | 0.57 | SignalP-noTM |
| gj_188521935_gb_ACD598801_ | 0.113 | 30 | 0.16  | 30 | 0.417 | 27 | 0.176 | 0.166 | N | 0.51 | SignalP-TM   |
| gj_188521936_gb_ACD598811_ | 0.108 | 36 | 0.103 | 29 | 0.135 | 9  | 0.1   | 0.102 | N | 0.57 | SignalP-noTM |
| gj_188521942_gb_ACD598871_ | 0.411 | 21 | 0.358 | 21 | 0.512 | 16 | 0.275 | 0.319 | N | 0.57 | SignalP-noTM |
| gj_188521944_gb_ACD598891_ | 0.131 | 42 | 0.118 | 11 | 0.198 | 1  | 0.133 | 0.125 | N | 0.57 | SignalP-noTM |
| gj_188521946_gb_ACD598911_ | 0.108 | 48 | 0.103 | 48 | 0.139 | 6  | 0.103 | 0.103 | N | 0.57 | SignalP-noTM |
| gj_188521952_gb_ACD598971_ | 0.11  | 36 | 0.129 | 17 | 0.242 | 6  | 0.155 | 0.141 | N | 0.57 | SignalP-noTM |
| gj_188521953_gb_ACD598981_ | 0.156 | 42 | 0.146 | 42 | 0.219 | 19 | 0.143 | 0.145 | N | 0.57 | SignalP-noTM |
| gj_188521954_gb_ACD598991_ | 0.206 | 21 | 0.145 | 21 | 0.18  | 20 | 0.107 | 0.131 | N | 0.51 | SignalP-TM   |
| gj_188521955_gb_ACD599001_ | 0.116 | 56 | 0.127 | 14 | 0.226 | 12 | 0.149 | 0.137 | N | 0.57 | SignalP-noTM |
| gj_188521956_gb_ACD599011_ | 0.115 | 18 | 0.132 | 11 | 0.263 | 4  | 0.177 | 0.153 | N | 0.57 | SignalP-noTM |
| gj_188521961_gb_ACD599061_ | 0.113 | 10 | 0.11  | 16 | 0.15  | 10 | 0.111 | 0.11  | N | 0.57 | SignalP-noTM |
| gj_188521962_gb_ACD599071_ | 0.14  | 49 | 0.121 | 44 | 0.134 | 8  | 0.1   | 0.111 | N | 0.57 | SignalP-noTM |
| gj_188521963_gb_ACD599081_ | 0.137 | 49 | 0.182 | 11 | 0.465 | 3  | 0.345 | 0.259 | N | 0.57 | SignalP-noTM |
| gj_188521964_gb_ACD599091_ | 0.14  | 23 | 0.117 | 23 | 0.228 | 44 | 0.089 | 0.104 | N | 0.57 | SignalP-noTM |
| gj_188521965_gb_ACD599101_ | 0.14  | 19 | 0.14  | 19 | 0.198 | 18 | 0.143 | 0.142 | N | 0.57 | SignalP-noTM |
| gj_188521966_gb_ACD599111_ | 0.152 | 27 | 0.183 | 25 | 0.423 | 15 | 0.255 | 0.217 | N | 0.57 | SignalP-noTM |
| gj_188521967_gb_ACD599121_ | 0.136 | 18 | 0.17  | 11 | 0.42  | 1  | 0.276 | 0.22  | N | 0.57 | SignalP-noTM |
| gj_188521970_gb_ACD599151_ | 0.118 | 39 | 0.111 | 39 | 0.136 | 35 | 0.086 | 0.099 | N | 0.57 | SignalP-noTM |
| gj_188521975_gb_ACD599201_ | 0.684 | 36 | 0.692 | 36 | 0.959 | 21 | 0.8   | 0.743 | Y | 0.57 | SignalP-noTM |
| gj_188521979_gb_ACD599241_ | 0.246 | 29 | 0.223 | 29 | 0.481 | 11 | 0.298 | 0.259 | N | 0.57 | SignalP-noTM |
| gj_188521980_gb_ACD599251_ | 0.397 | 20 | 0.385 | 20 | 0.655 | 4  | 0.458 | 0.419 | N | 0.57 | SignalP-noTM |
| gj_188521981_gb_ACD599261_ | 0.729 | 24 | 0.814 | 24 | 0.973 | 17 | 0.927 | 0.867 | Y | 0.57 | SignalP-noTM |
| gj_188522328_gb_ACD602731_ | 0.126 | 29 | 0.122 | 23 | 0.177 | 10 | 0.134 | 0.128 | N | 0.57 | SignalP-noTM |
| gj_188522330_gb_ACD602751_ | 0.123 | 52 | 0.152 | 11 | 0.279 | 4  | 0.233 | 0.19  | N | 0.57 | SignalP-noTM |
| gj_188522331_gb_ACD602761_ | 0.156 | 16 | 0.215 | 16 | 0.38  | 13 | 0.297 | 0.254 | N | 0.57 | SignalP-noTM |
| gj_188522333_gb_ACD602781_ | 0.732 | 28 | 0.808 | 28 | 0.962 | 27 | 0.829 | 0.818 | Y | 0.57 | SignalP-noTM |
| gj_188522334_gb_ACD602791_ | 0.183 | 32 | 0.224 | 32 | 0.592 | 14 | 0.385 | 0.3   | N | 0.57 | SignalP-noTM |
| gj_188522336_gb_ACD602811_ | 0.179 | 31 | 0.195 | 31 | 0.373 | 27 | 0.223 | 0.205 | N | 0.51 | SignalP-TM   |
| gj_188522339_gb_ACD602841_ | 0.143 | 41 | 0.112 | 41 | 0.111 | 25 | 0.086 | 0.1   | N | 0.57 | SignalP-noTM |
| gj_188522340_gb_ACD602851_ | 0.119 | 42 | 0.107 | 18 | 0.137 | 11 | 0.101 | 0.104 | N | 0.57 | SignalP-noTM |
| gj_188522342_gb_ACD602871_ | 0.138 | 45 | 0.207 | 15 | 0.6   | 11 | 0.388 | 0.292 | N | 0.57 | SignalP-noTM |
| gj_188522343_gb_ACD602881_ | 0.194 | 31 | 0.181 | 31 | 0.266 | 8  | 0.181 | 0.181 | N | 0.57 | SignalP-noTM |
| gj_188522344_gb_ACD602891_ | 0.263 | 22 | 0.23  | 22 | 0.339 | 1  | 0.2   | 0.216 | N | 0.57 | SignalP-noTM |
| gj_188522347_gb_ACD602921_ | 0.358 | 28 | 0.228 | 28 | 0.394 | 1  | 0.214 | 0.223 | N | 0.51 | SignalP-TM   |
| gj_188522348_gb_ACD602931_ | 0.171 | 48 | 0.203 | 12 | 0.506 | 1  | 0.396 | 0.293 | N | 0.57 | SignalP-noTM |
| gj_188522349_gb_ACD602941_ | 0.116 | 30 | 0.111 | 11 | 0.146 | 10 | 0.127 | 0.119 | N | 0.57 | SignalP-noTM |
| gj_188522351_gb_ACD602961_ | 0.161 | 68 | 0.117 | 68 | 0.134 | 6  | 0.083 | 0.101 | N | 0.57 | SignalP-noTM |
| gj_188522352_gb_ACD602971_ | 0.118 | 52 | 0.108 | 52 | 0.16  | 51 | 0.087 | 0.098 | N | 0.57 | SignalP-noTM |
| gj_188522353_gb_ACD602981_ | 0.207 | 38 | 0.172 | 28 | 0.273 | 10 | 0.191 | 0.181 | N | 0.57 | SignalP-noTM |
| gj_188522355_gb_ACD603001_ | 0.149 | 45 | 0.125 | 45 | 0.143 | 43 | 0.097 | 0.112 | N | 0.57 | SignalP-noTM |
| gj_188522356_gb_ACD603011_ | 0.127 | 20 | 0.207 | 14 | 0.446 | 13 | 0.342 | 0.27  | N | 0.57 | SignalP-noTM |
| gj_188522358_gb_ACD603031_ | 0.111 | 35 | 0.108 | 46 | 0.13  | 34 | 0.095 | 0.102 | N | 0.57 | SignalP-noTM |
| gj_188522359_gb_ACD603041_ | 0.102 | 44 | 0.108 | 57 | 0.129 | 46 | 0.091 | 0.1   | N | 0.57 | SignalP-noTM |
| gj_188522360_gb_ACD603051_ | 0.131 | 33 | 0.121 | 52 | 0.185 | 41 | 0.108 | 0.115 | N | 0.57 | SignalP-noTM |
| gj_188522361_gb_ACD603061_ | 0.119 | 61 | 0.121 | 40 | 0.175 | 36 | 0.118 | 0.12  | N | 0.57 | SignalP-noTM |
| gj_188522362_gb_ACD603071_ | 0.113 | 24 | 0.133 | 24 | 0.269 | 21 | 0.142 | 0.137 | N | 0.57 | SignalP-noTM |
| gj_188522363_gb_ACD603081_ | 0.123 | 60 | 0.117 | 12 | 0.154 | 11 | 0.12  | 0.119 | N | 0.57 | SignalP-noTM |
| gj_188522364_gb_ACD603091_ | 0.125 | 40 | 0.119 | 11 | 0.214 | 1  | 0.13  | 0.124 | N | 0.57 | SignalP-noTM |
| gj_528897490_gb_AGS478541_ | 0.121 | 43 | 0.141 | 43 | 0.217 | 33 | 0.149 | 0.145 | N | 0.57 | SignalP-noTM |
| gj_188522369_gb_ACD603141_ | 0.124 | 45 | 0.117 | 45 | 0.174 | 40 | 0.092 | 0.105 | N | 0.57 | SignalP-noTM |
| gj_188522370_gb_ACD603151_ | 0.113 | 14 | 0.106 | 66 | 0.116 | 36 | 0.09  | 0.098 | N | 0.57 | SignalP-noTM |
| gj_188522372_gb_ACD603171_ | 0.101 | 67 | 0.168 | 11 | 0.311 | 2  | 0.286 | 0.223 | N | 0.57 | SignalP-noTM |
| gj_188522373_gb_ACD603181_ | 0.141 | 39 | 0.157 | 17 | 0.331 | 16 | 0.228 | 0.191 | N | 0.57 | SignalP-noTM |
| gj_188522374_gb_ACD603191_ | 0.111 | 17 | 0.128 | 11 | 0.276 | 2  | 0.152 | 0.137 | N | 0.51 | SignalP-TM   |
| gj_188522375_gb_ACD603201_ | 0.134 | 44 | 0.177 | 32 | 0.279 | 20 | 0.196 | 0.186 | N | 0.57 | SignalP-noTM |
| gj_188522377_gb_ACD603221_ | 0.152 | 35 | 0.127 | 54 | 0.207 | 50 | 0.104 | 0.116 | N | 0.57 | SignalP-noTM |
| gj_188522378_gb_ACD603231_ | 0.12  | 61 | 0.116 | 19 | 0.167 | 12 | 0.117 | 0.116 | N | 0.57 | SignalP-noTM |
| gj_188522379_gb_ACD603241_ | 0.141 | 26 | 0.135 | 26 | 0.218 | 1  | 0.136 | 0.136 | N | 0.57 | SignalP-noTM |
| gj_188522380_gb_ACD603251_ | 0.172 | 20 | 0.133 | 20 | 0.121 | 12 | 0.096 | 0.116 | N | 0.57 | SignalP-noTM |
| gj_188522381_gb_ACD603261_ | 0.118 | 61 | 0.136 | 11 | 0.312 | 1  | 0.169 | 0.152 | N | 0.57 | SignalP-noTM |
| gj_188522382_gb_ACD603271_ | 0.115 | 24 | 0.125 | 24 | 0.154 | 18 | 0.129 | 0.127 | N | 0.57 | SignalP-noTM |
| gj_188522383_gb_ACD603281_ | 0.123 | 54 | 0.114 | 54 | 0.111 | 47 | 0.084 | 0.1   | N | 0.57 | SignalP-noTM |
| gj_188522384_gb_ACD603291_ | 0.113 | 27 | 0.109 | 11 | 0.149 | 2  | 0.122 | 0.115 | N | 0.57 | SignalP-noTM |
| gj_188523635_gb_ACD615801_ | 0.168 | 23 | 0.167 | 23 | 0.211 | 20 | 0.166 | 0.167 | N | 0.51 | SignalP-TM   |
| gj_188523638_gb_ACD615831_ | 0.183 | 21 | 0.245 | 21 | 0.543 | 12 | 0.315 | 0.278 | N | 0.57 | SignalP-noTM |
| gj_188523641_gb_ACD615861_ | 0.112 | 55 | 0.112 | 55 | 0.159 | 40 | 0.1   | 0.106 | N | 0.57 | SignalP-noTM |
| gj_188523642_gb_ACD615871_ | 0.157 | 42 | 0.145 | 42 | 0.219 | 19 | 0.142 | 0.143 | N | 0.57 | SignalP-noTM |
| gj_188523643_gb_ACD615881_ | 0.194 | 32 | 0.155 | 32 | 0.336 | 3  | 0.154 | 0.155 | N | 0.57 | SignalP-noTM |
| gj_188523649_gb_ACD615941_ | 0.111 | 27 | 0.122 | 11 | 0.197 | 5  | 0.159 | 0.136 | N | 0.51 | SignalP-TM   |
| gj_188523651_gb_ACD615961_ | 0.106 | 55 | 0.115 | 14 | 0.183 | 11 | 0.129 | 0.122 | N | 0.57 | SignalP-noTM |
| gj_188523652_gb_ACD615971_ | 0.452 | 29 | 0.453 | 29 | 0.64  | 12 | 0.493 | 0.468 | N | 0.51 | SignalP-TM   |
| gj_188523656_gb_ACD616011_ | 0.643 | 22 | 0.768 | 22 | 0.961 | 11 | 0.915 | 0.837 | Y | 0.57 | SignalP-noTM |
| gj_188523657_gb_ACD616021_ | 0.751 | 21 | 0.798 | 21 | 0.898 | 2  | 0.845 | 0.82  | Y | 0.57 | SignalP-noTM |
| gj_188523660_gb_ACD616051_ | 0.812 | 26 | 0.846 | 26 | 0.965 | 11 | 0.902 | 0.872 | Y | 0.57 | SignalP-noTM |

|          |          |          |          |                            |
|----------|----------|----------|----------|----------------------------|
| 0.831459 | 0.038126 | 0.83355  | 0.567712 | gj_188523220_gb_ACD611651_ |
| 0.932264 | 0.999695 | 0.828495 | 0.920151 | gj_188523221_gb_ACD611661_ |
| 0.196234 | 0.097969 | 0.162329 | 0.152177 | gj_188523224_gb_ACD611691_ |
| 0.118157 | 0.139314 | 0.092038 | 0.116503 | gj_188523225_gb_ACD611701_ |
| 0.135404 | 0.362622 | 0.184673 | 0.227566 | gj_188523226_gb_ACD611711_ |
| 0.189233 | 0.002329 | 0.194818 | 0.128793 | gj_188523227_gb_ACD611721_ |
| 0.87804  | 0.99723  | 0.781597 | 0.885622 | gj_188523229_gb_ACD611741_ |
| 0.377306 | 0.908711 | 0.22461  | 0.503542 | gj_188523231_gb_ACD611761_ |
| 0.167702 | 0.142217 | 0.137881 | 0.149267 | gj_188523234_gb_ACD611791_ |
| 0.094576 | 0.649764 | 0.195761 | 0.313367 | gj_188523236_gb_ACD611811_ |
| 0.126198 | 0.312383 | 0.248431 | 0.229004 | gj_188523237_gb_ACD611821_ |
| 0.13331  | 0.094319 | 0.125209 | 0.117613 | gj_188523238_gb_ACD611831_ |
| 0.129544 | 0.005899 | 0.300273 | 0.145239 | gj_188523695_gb_ACD616401_ |
| 0.258649 | 0.486503 | 0.230942 | 0.325365 | gj_188523696_gb_ACD616411_ |
| 0.092541 | 0.015172 | 0.153164 | 0.086959 | gj_188523697_gb_ACD616421_ |
| 0.125868 | 0.091289 | 0.182426 | 0.133194 | gj_188523698_gb_ACD616431_ |
| 0.460334 | 0.06717  | 0.548596 | 0.3587   | gj_188523699_gb_ACD616441_ |
| 0.104238 | 0.049219 | 0.109097 | 0.087518 | gj_188523700_gb_ACD616451_ |
| 0.082036 | 0.031129 | 0.082036 | 0.065067 | gj_188523701_gb_ACD616461_ |
| 0.114153 | 0.011974 | 0.14629  | 0.090806 | gj_188523704_gb_ACD616491_ |
| 0.163147 | 0.134354 | 0.144427 | 0.147309 | gj_188523706_gb_ACD616511_ |
| 0.195761 | 0.037471 | 0.27032  | 0.167851 | gj_188523707_gb_ACD616521_ |
| 0.686972 | 0.594114 | 0.633904 | 0.63883  | gj_188523708_gb_ACD616531_ |
| 0.363316 | 0.98189  | 0.455865 | 0.600357 | gj_188523709_gb_ACD616541_ |
| 0.50375  | 0.989397 | 0.373788 | 0.622312 | gj_188523710_gb_ACD616551_ |
| 0.168541 | 0.027225 | 0.161109 | 0.118958 | gj_188523239_gb_ACD611841_ |
| 0.083173 | 0.043772 | 0.119729 | 0.082225 | gj_188523240_gb_ACD611851_ |
| 0.115679 | 0.039128 | 0.129544 | 0.094784 | gj_188523241_gb_ACD611861_ |
| 0.116912 | 0.033961 | 0.178433 | 0.109769 | gj_188523243_gb_ACD611881_ |
| 0.248431 | 0.972775 | 0.073441 | 0.431549 | gj_188523245_gb_ACD611901_ |
| 0.087624 | 0.071226 | 0.211318 | 0.123389 | gj_188523247_gb_ACD611921_ |
| 0.082036 | 0.050068 | 0.090052 | 0.074052 | gj_188523248               |

|                            |       |    |       |    |       |    |       |       |   |      |              |
|----------------------------|-------|----|-------|----|-------|----|-------|-------|---|------|--------------|
| gj_188523661_gb_ACD61606_1 | 0.12  | 35 | 0.145 | 35 | 0.258 | 5  | 0.172 | 0.157 | N | 0.57 | SignalP-noTM |
| gj_188523663_gb_ACD61608_1 | 0.173 | 21 | 0.168 | 21 | 0.365 | 1  | 0.203 | 0.184 | N | 0.57 | SignalP-noTM |
| gj_188523664_gb_ACD61609_1 | 0.127 | 11 | 0.124 | 21 | 0.236 | 9  | 0.121 | 0.122 | N | 0.57 | SignalP-noTM |
| gj_188523665_gb_ACD61610_1 | 0.161 | 20 | 0.101 | 45 | 0.106 | 52 | 0.056 | 0.08  | N | 0.57 | SignalP-noTM |
| gj_188523666_gb_ACD61611_1 | 0.124 | 48 | 0.164 | 14 | 0.345 | 7  | 0.265 | 0.211 | N | 0.57 | SignalP-noTM |
| gj_188523667_gb_ACD61612_1 | 0.123 | 22 | 0.132 | 22 | 0.178 | 21 | 0.141 | 0.136 | N | 0.57 | SignalP-noTM |
| gj_188523668_gb_ACD61613_1 | 0.131 | 60 | 0.187 | 21 | 0.561 | 17 | 0.288 | 0.234 | N | 0.57 | SignalP-noTM |
| gj_188523669_gb_ACD61614_1 | 0.109 | 7  | 0.111 | 62 | 0.141 | 52 | 0.099 | 0.106 | N | 0.57 | SignalP-noTM |
| gj_188523673_gb_ACD61618_1 | 0.124 | 26 | 0.105 | 67 | 0.145 | 56 | 0.083 | 0.097 | N | 0.51 | SignalP-TM   |
| gj_188523674_gb_ACD61619_1 | 0.185 | 18 | 0.126 | 18 | 0.129 | 14 | 0.089 | 0.109 | N | 0.57 | SignalP-noTM |
| gj_188523677_gb_ACD61622_1 | 0.175 | 17 | 0.178 | 45 | 0.483 | 37 | 0.182 | 0.18  | N | 0.51 | SignalP-TM   |
| gj_188523681_gb_ACD61626_1 | 0.215 | 40 | 0.191 | 40 | 0.274 | 36 | 0.169 | 0.18  | N | 0.57 | SignalP-noTM |
| gj_188523682_gb_ACD61627_1 | 0.12  | 28 | 0.142 | 11 | 0.272 | 2  | 0.194 | 0.166 | N | 0.57 | SignalP-noTM |
| gj_188523683_gb_ACD61628_1 | 0.277 | 33 | 0.179 | 33 | 0.168 | 32 | 0.109 | 0.146 | N | 0.57 | SignalP-noTM |
| gj_188523684_gb_ACD61629_1 | 0.104 | 3  | 0.094 | 16 | 0.104 | 4  | 0.088 | 0.091 | N | 0.57 | SignalP-noTM |
| gj_188523685_gb_ACD61630_1 | 0.273 | 26 | 0.169 | 26 | 0.156 | 9  | 0.114 | 0.143 | N | 0.57 | SignalP-noTM |
| gj_188523686_gb_ACD61631_1 | 0.122 | 28 | 0.102 | 70 | 0.112 | 65 | 0.084 | 0.094 | N | 0.57 | SignalP-noTM |
| gj_188523687_gb_ACD61632_1 | 0.102 | 68 | 0.108 | 32 | 0.132 | 30 | 0.105 | 0.107 | N | 0.57 | SignalP-noTM |
| gj_188523688_gb_ACD61633_1 | 0.127 | 42 | 0.122 | 11 | 0.202 | 5  | 0.164 | 0.138 | N | 0.51 | SignalP-TM   |
| gj_188523689_gb_ACD61634_1 | 0.135 | 26 | 0.178 | 26 | 0.302 | 25 | 0.222 | 0.198 | N | 0.57 | SignalP-noTM |
| gj_188523691_gb_ACD61636_1 | 0.141 | 20 | 0.148 | 20 | 0.297 | 4  | 0.185 | 0.165 | N | 0.57 | SignalP-noTM |
| gj_188523692_gb_ACD61637_1 | 0.843 | 30 | 0.819 | 30 | 0.972 | 19 | 0.866 | 0.841 | Y | 0.57 | SignalP-noTM |
| gj_188523693_gb_ACD61638_1 | 0.118 | 53 | 0.118 | 37 | 0.161 | 9  | 0.124 | 0.121 | N | 0.57 | SignalP-noTM |
| gj_188523694_gb_ACD61639_1 | 0.1   | 18 | 0.101 | 42 | 0.113 | 14 | 0.097 | 0.099 | N | 0.57 | SignalP-noTM |
| gj_188523695_gb_ACD61640_1 | 0.163 | 40 | 0.108 | 40 | 0.188 | 1  | 0.087 | 0.098 | N | 0.57 | SignalP-noTM |
| gj_188523696_gb_ACD61641_1 | 0.141 | 66 | 0.188 | 12 | 0.442 | 13 | 0.354 | 0.266 | N | 0.57 | SignalP-noTM |
| gj_188523697_gb_ACD61642_1 | 0.121 | 63 | 0.115 | 11 | 0.179 | 2  | 0.132 | 0.123 | N | 0.57 | SignalP-noTM |
| gj_188523698_gb_ACD61643_1 | 0.106 | 24 | 0.133 | 24 | 0.239 | 21 | 0.165 | 0.145 | N | 0.51 | SignalP-TM   |
| gj_188523699_gb_ACD61644_1 | 0.657 | 51 | 0.485 | 51 | 0.471 | 43 | 0.268 | 0.405 | N | 0.51 | SignalP-TM   |
| gj_188523700_gb_ACD61645_1 | 0.107 | 46 | 0.101 | 64 | 0.137 | 58 | 0.079 | 0.093 | N | 0.51 | SignalP-TM   |
| gj_188523701_gb_ACD61646_1 | 0.142 | 52 | 0.116 | 52 | 0.126 | 2  | 0.092 | 0.105 | N | 0.57 | SignalP-noTM |
| gj_188523704_gb_ACD61649_1 | 0.6   | 24 | 0.716 | 24 | 0.961 | 20 | 0.854 | 0.781 | Y | 0.57 | SignalP-noTM |
| gj_188523706_gb_ACD61651_1 | 0.115 | 50 | 0.166 | 11 | 0.47  | 1  | 0.257 | 0.2   | N | 0.51 | SignalP-TM   |
| gj_188523707_gb_ACD61652_1 | 0.215 | 23 | 0.419 | 23 | 0.919 | 1  | 0.844 | 0.618 | Y | 0.57 | SignalP-noTM |
| gj_188523708_gb_ACD61653_1 | 0.216 | 29 | 0.268 | 29 | 0.511 | 1  | 0.334 | 0.293 | N | 0.51 | SignalP-TM   |
| gj_188523709_gb_ACD61654_1 | 0.115 | 49 | 0.133 | 49 | 0.221 | 47 | 0.14  | 0.137 | N | 0.57 | SignalP-noTM |
| gj_188523710_gb_ACD61655_1 | 0.101 | 29 | 0.139 | 11 | 0.244 | 4  | 0.197 | 0.167 | N | 0.57 | SignalP-noTM |
| gj_188523175_gb_ACD61120_1 | 0.102 | 3  | 0.104 | 48 | 0.122 | 41 | 0.092 | 0.098 | N | 0.57 | SignalP-noTM |
| gj_188523176_gb_ACD61121_1 | 0.581 | 36 | 0.696 | 36 | 0.924 | 32 | 0.605 | 0.653 | Y | 0.57 | SignalP-noTM |
| gj_188523177_gb_ACD61122_1 | 0.108 | 18 | 0.116 | 70 | 0.179 | 1  | 0.102 | 0.111 | N | 0.51 | SignalP-TM   |
| gj_188523179_gb_ACD61124_1 | 0.129 | 40 | 0.129 | 40 | 0.23  | 1  | 0.093 | 0.115 | N | 0.51 | SignalP-TM   |
| gj_188523180_gb_ACD61125_1 | 0.231 | 19 | 0.459 | 19 | 0.956 | 10 | 0.922 | 0.677 | Y | 0.57 | SignalP-noTM |
| gj_188523181_gb_ACD61126_1 | 0.136 | 18 | 0.101 | 18 | 0.152 | 1  | 0.082 | 0.094 | N | 0.51 | SignalP-TM   |
| gj_188523182_gb_ACD61127_1 | 0.145 | 36 | 0.107 | 36 | 0.132 | 8  | 0.095 | 0.101 | N | 0.57 | SignalP-noTM |
| gj_188523183_gb_ACD61128_1 | 0.165 | 48 | 0.172 | 11 | 0.357 | 1  | 0.304 | 0.221 | N | 0.51 | SignalP-TM   |
| gj_188523189_gb_ACD61134_1 | 0.215 | 37 | 0.142 | 37 | 0.213 | 3  | 0.109 | 0.127 | N | 0.57 | SignalP-noTM |
| gj_188523190_gb_ACD61135_1 | 0.121 | 33 | 0.12  | 14 | 0.168 | 8  | 0.144 | 0.131 | N | 0.57 | SignalP-noTM |
| gj_188523191_gb_ACD61136_1 | 0.126 | 42 | 0.116 | 42 | 0.131 | 53 | 0.094 | 0.105 | N | 0.57 | SignalP-noTM |
| gj_188523193_gb_ACD61138_1 | 0.368 | 23 | 0.593 | 23 | 0.969 | 15 | 0.943 | 0.757 | Y | 0.57 | SignalP-noTM |
| gj_188523194_gb_ACD61139_1 | 0.103 | 21 | 0.103 | 53 | 0.153 | 1  | 0.098 | 0.1   | N | 0.57 | SignalP-noTM |
| gj_188523195_gb_ACD61140_1 | 0.168 | 16 | 0.257 | 16 | 0.526 | 6  | 0.411 | 0.329 | N | 0.57 | SignalP-noTM |
| gj_188523196_gb_ACD61141_1 | 0.116 | 56 | 0.106 | 56 | 0.134 | 51 | 0.086 | 0.096 | N | 0.57 | SignalP-noTM |
| gj_188523197_gb_ACD61142_1 | 0.103 | 25 | 0.122 | 11 | 0.197 | 2  | 0.145 | 0.132 | N | 0.57 | SignalP-noTM |
| gj_188523199_gb_ACD61144_1 | 0.154 | 31 | 0.131 | 31 | 0.195 | 33 | 0.111 | 0.121 | N | 0.57 | SignalP-noTM |
| gj_188523200_gb_ACD61145_1 | 0.356 | 23 | 0.434 | 23 | 0.808 | 18 | 0.522 | 0.475 | N | 0.57 | SignalP-noTM |
| gj_188523202_gb_ACD61147_1 | 0.341 | 27 | 0.576 | 27 | 0.992 | 19 | 0.964 | 0.759 | Y | 0.57 | SignalP-noTM |
| gj_188523210_gb_ACD61155_1 | 0.172 | 19 | 0.156 | 19 | 0.249 | 9  | 0.137 | 0.149 | N | 0.51 | SignalP-TM   |
| gj_188523211_gb_ACD61156_1 | 0.136 | 47 | 0.145 | 11 | 0.329 | 3  | 0.196 | 0.169 | N | 0.57 | SignalP-noTM |
| gj_188523214_gb_ACD61159_1 | 0.11  | 45 | 0.101 | 65 | 0.11  | 55 | 0.082 | 0.092 | N | 0.57 | SignalP-noTM |
| gj_188523216_gb_ACD61161_1 | 0.111 | 22 | 0.109 | 22 | 0.125 | 11 | 0.099 | 0.105 | N | 0.57 | SignalP-noTM |
| gj_188523217_gb_ACD61162_1 | 0.119 | 25 | 0.157 | 18 | 0.296 | 13 | 0.212 | 0.178 | N | 0.51 | SignalP-TM   |
| gj_188523218_gb_ACD61163_1 | 0.369 | 65 | 0.201 | 65 | 0.204 | 14 | 0.117 | 0.161 | N | 0.57 | SignalP-noTM |
| gj_188523219_gb_ACD61164_1 | 0.124 | 19 | 0.132 | 39 | 0.254 | 1  | 0.097 | 0.119 | N | 0.51 | SignalP-TM   |
| gj_188523220_gb_ACD61165_1 | 0.533 | 41 | 0.364 | 41 | 0.403 | 38 | 0.17  | 0.273 | N | 0.57 | SignalP-noTM |
| gj_188523221_gb_ACD61166_1 | 0.114 | 28 | 0.15  | 31 | 0.365 | 27 | 0.187 | 0.167 | N | 0.57 | SignalP-noTM |
| gj_188523224_gb_ACD61169_1 | 0.163 | 23 | 0.123 | 23 | 0.229 | 2  | 0.116 | 0.12  | N | 0.57 | SignalP-noTM |
| gj_188523225_gb_ACD61170_1 | 0.141 | 22 | 0.142 | 12 | 0.249 | 10 | 0.201 | 0.169 | N | 0.57 | SignalP-noTM |
| gj_188523226_gb_ACD61171_1 | 0.129 | 43 | 0.149 | 43 | 0.272 | 40 | 0.131 | 0.14  | N | 0.57 | SignalP-noTM |
| gj_188523227_gb_ACD61172_1 | 0.208 | 41 | 0.216 | 21 | 0.453 | 14 | 0.341 | 0.262 | N | 0.51 | SignalP-TM   |
| gj_188523229_gb_ACD61174_1 | 0.118 | 39 | 0.113 | 11 | 0.15  | 7  | 0.129 | 0.12  | N | 0.57 | SignalP-noTM |
| gj_188523231_gb_ACD61176_1 | 0.106 | 26 | 0.117 | 35 | 0.206 | 1  | 0.119 | 0.118 | N | 0.57 | SignalP-noTM |
| gj_188523234_gb_ACD61179_1 | 0.533 | 60 | 0.321 | 60 | 0.271 | 55 | 0.114 | 0.223 | N | 0.57 | SignalP-noTM |
| gj_188523236_gb_ACD61181_1 | 0.16  | 32 | 0.194 | 21 | 0.342 | 19 | 0.218 | 0.203 | N | 0.51 | SignalP-TM   |
| gj_188523237_gb_ACD61182_1 | 0.155 | 16 | 0.338 | 16 | 0.85  | 13 | 0.743 | 0.528 | N | 0.57 | SignalP-noTM |
| gj_188523238_gb_ACD61183_1 | 0.117 | 20 | 0.124 | 20 | 0.154 | 12 | 0.13  | 0.127 | N | 0.57 | SignalP-noTM |
| gj_188523239_gb_ACD61184_1 | 0.126 | 33 | 0.124 | 33 | 0.202 | 30 | 0.12  | 0.122 | N | 0.57 | SignalP-noTM |
| gj_188523240_gb_ACD61185_1 | 0.108 | 18 | 0.11  | 39 | 0.142 | 35 | 0.104 | 0.107 | N | 0.57 | SignalP-noTM |
| gj_188523241_gb_ACD61186_1 | 0.327 | 29 | 0.165 | 29 | 0.323 | 1  | 0.133 | 0.153 | N | 0.51 | SignalP-TM   |

|          |          |          |          |                            |
|----------|----------|----------|----------|----------------------------|
| 0.805652 | 0.981403 | 0.843301 | 0.876785 | gj_188518777_gb_ACD56722_1 |
| 0.973789 | 0.753246 | 0.965444 | 0.897493 | gj_188518778_gb_ACD56723_1 |
| 0.112346 | 0.040272 | 0.149694 | 0.100771 | gj_188518783_gb_ACD56728_1 |
| 0.280496 | 0.419701 | 0.448434 | 0.382877 | gj_188518784_gb_ACD56729_1 |
| 0.165619 | 0.065498 | 0.257501 | 0.162873 | gj_188518785_gb_ACD56730_1 |
| 0.90016  | 0.99789  | 0.905424 | 0.934491 | gj_188518786_gb_ACD56731_1 |
| 0.054992 | 0.006647 | 0.061399 | 0.041013 | gj_188518791_gb_ACD56736_1 |
| 0.940476 | 0.999432 | 0.937203 | 0.959037 | gj_188518792_gb_ACD56737_1 |
| 0.182426 | 0.001923 | 0.295254 | 0.159868 | gj_188518793_gb_ACD56738_1 |
| 0.594837 | 0.458843 | 0.699097 | 0.584259 | gj_188518794_gb_ACD56739_1 |
| 0.099302 | 0.023939 | 0.140397 | 0.087879 | gj_188518795_gb_ACD56740_1 |
| 0.078493 | 0.007971 | 0.197182 | 0.094549 | gj_188518796_gb_ACD56741_1 |
| 0.07385  | 0.115679 | 0.140759 | 0.110096 | gj_188518797_gb_ACD56742_1 |
| 0.073237 | 0.033472 | 0.148552 | 0.085087 | gj_188518798_gb_ACD56743_1 |
| 0.091289 | 0.10147  | 0.166866 | 0.119875 | gj_188518800_gb_ACD56745_1 |
| 0.074468 | 0.019379 | 0.119413 | 0.071087 | gj_188518801_gb_ACD56746_1 |
| 0.6142   | 0.018057 | 0.795597 | 0.475951 | gj_188518809_gb_ACD56754_1 |
| 0.647028 | 0.960189 | 0.856313 | 0.821177 | gj_188518812_gb_ACD56757_1 |
| 0.195761 | 0.093808 | 0.105931 | 0.131833 | gj_188518813_gb_ACD56758_1 |
| 0.183322 | 0.079585 | 0.257501 | 0.173469 | gj_188518815_gb_ACD56760_1 |
| 0.902031 | 0.999903 | 0.731452 | 0.877795 | gj_188518817_gb_ACD56762_1 |
| 0.330705 | 0.935595 | 0.470036 | 0.578779 | gj_188518818_gb_ACD56763_1 |
| 0.96296  | 0.996792 | 0.913568 | 0.957773 | gj_188518819_gb_ACD56764_1 |
| 0.087145 | 0.057867 | 0.152387 | 0.099133 | gj_188518820_gb_ACD56765_1 |
| 0.891194 | 0.965842 | 0.801866 | 0.886301 | gj_188518821_gb_ACD56766_1 |
| 0.159494 | 0.053758 | 0.16645  | 0.126567 | gj_188518823_gb_ACD56768_1 |
| 0.13717  | 0.07806  | 0.136108 | 0.117113 | gj_188518826_gb_ACD56771_1 |
| 0.391503 | 0.591942 | 0.54711  | 0.510185 | gj_188518828_gb_ACD56773_1 |
| 0.172359 | 0.116912 | 0.194348 | 0.161206 | gj_188518830_gb_ACD56775_1 |
| 0.30853  | 0.039582 | 0.547853 | 0.298655 | gj_188518831_gb_ACD56776_1 |
| 0.05869  | 0.038346 | 0.112346 | 0.069794 | gj_188518840_gb_ACD56785_1 |
| 0.884321 | 0.85705  | 0.861045 | 0.867472 | gj_188518841_gb_ACD56786_1 |
| 0.191081 | 0.075091 | 0.23041  | 0.165527 | gj_188519118_gb_ACD57063_1 |
| 0.27032  |          |          |          |                            |

|                            |       |    |       |    |       |    |       |       |   |      |              |
|----------------------------|-------|----|-------|----|-------|----|-------|-------|---|------|--------------|
| gi_188523243_gb_ACD61188.1 | 0.116 | 57 | 0.098 | 34 | 0.104 | 29 | 0.088 | 0.093 | N | 0.57 | SignalP-noTM |
| gi_188523245_gb_ACD61190.1 | 0.171 | 35 | 0.148 | 35 | 0.316 | 34 | 0.119 | 0.135 | N | 0.57 | SignalP-noTM |
| gi_188523247_gb_ACD61192.1 | 0.12  | 61 | 0.113 | 61 | 0.124 | 1  | 0.092 | 0.103 | N | 0.57 | SignalP-noTM |
| gi_188523248_gb_ACD61193.1 | 0.12  | 35 | 0.108 | 48 | 0.187 | 1  | 0.098 | 0.104 | N | 0.57 | SignalP-noTM |
| gi_188523250_gb_ACD61195.1 | 0.134 | 32 | 0.13  | 16 | 0.212 | 12 | 0.172 | 0.15  | N | 0.57 | SignalP-noTM |
| gi_188523251_gb_ACD61196.1 | 0.106 | 23 | 0.098 | 70 | 0.108 | 67 | 0.081 | 0.09  | N | 0.57 | SignalP-noTM |

|          |          |          |          |                            |
|----------|----------|----------|----------|----------------------------|
| 0.716466 | 0.998496 | 0.757128 | 0.82403  | gi_188519231_gb_ACD57176.1 |
| 0.945628 | 0.999174 | 0.933578 | 0.95946  | gi_188519232_gb_ACD57177.1 |
| 0.844881 | 0.282316 | 0.868413 | 0.665203 | gi_188519239_gb_ACD57184.1 |
| 0.094063 | 0.073237 | 0.095868 | 0.087723 | gi_188522382_gb_ACD60327.1 |
| 0.086195 | 0.027868 | 0.148552 | 0.087538 | gi_188522383_gb_ACD60328.1 |
| 0.931694 | 0.981621 | 0.76959  | 0.894302 | gi_188522384_gb_ACD60329.1 |



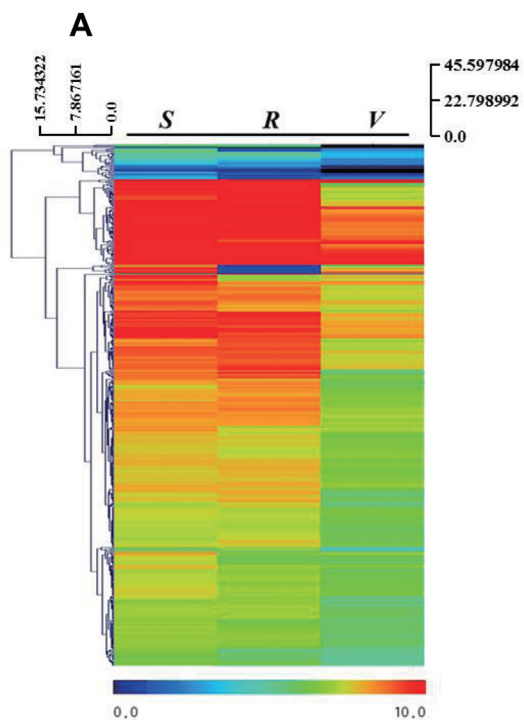

Up-regulated genes  
in Dongjin cultivar

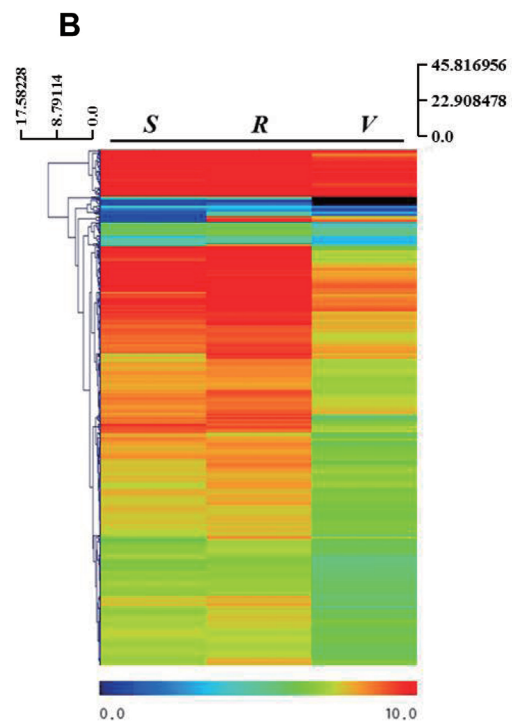

Up-regulated genes  
in Samgwang cultivar

**Supplementary Fig. 1.** Heat map of up-regulated genes during *in planta* [susceptible (S) and resistant (R)] growth as compared to *in vitro* (V) culture conditions.
